# Supplementary material for: A Convenient Synthesis of Novel Isoxazolidine and Isoxazole Isoquinolinones Fused Hybrids
Source: MDPI journal article supplement (doi:10.3390/molecules29010091), 2023-12-22

# A Convenient Synthesis of Novel Isoxazolidine and Isoxazole Isoquinolinones Fused Hybrids

Konstantinos A. Ouzounthanasis <sup>1</sup>, Stergios R. Rizos <sup>2</sup> and Alexandros E. Koumbis <sup>1,\*</sup>

<sup>1</sup>Laboratory of Organic Chemistry, Department of Chemistry, Aristotle University of Thessaloniki, Thessaloniki 54124, Greece

<sup>2</sup>Department of Chemistry and Chemical Biology, Harvard University, 12 Oxford St., Cambridge, 02138, Massachusetts, USA

\*akoumbis@chem.auth.gr

## SUPPORTING INFORMATION

### *Table of Contents*

|                                                                                       |     |
|---------------------------------------------------------------------------------------|-----|
| 1. Data for compounds <b>4</b> .....                                                  | S2  |
| 2. Data for compounds <b>5</b> .....                                                  | S4  |
| 3. Data for compounds <b>6, 7 and 8</b> .....                                         | S7  |
| 4. Data for compounds <b>9 and 10</b> .....                                           | S17 |
| 5. Data for compounds <b>12 and 13</b> .....                                          | S23 |
| 6. Data for compounds <b>18</b> .....                                                 | S31 |
| 7. Data for compounds <b>22</b> .....                                                 | S34 |
| 8. Data for compounds <b>23</b> .....                                                 | S38 |
| 9. Copies of <sup>1</sup> H, <sup>13</sup> C, <sup>19</sup> F and 2D NMR Spectra..... | S42 |

## 1. Data for compounds **4**

### (*Z*)-*N*-Benzyl-1-phenylmethanimine oxide (**4a**)

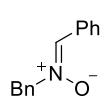

Yield: 97%; white solid;  $R_f = 0.31$  (*n*-hexane/EtOAc 1:1 *v/v*). All spectroscopic data were in accordance with those reported in the literature [1].

### (*Z*)-*N*-Benzyl-1-(*p*-tolyl)methanimine oxide (**4b**)

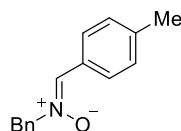

Yield: 97%; white solid;  $R_f = 0.25$  (*n*-hexane/EtOAc 1:1 *v/v*). All spectroscopic data were in accordance with those reported in the literature [1].

### (*Z*)-*N*-Benzyl-1-(4-methoxyphenyl)methanimine oxide (**4c**)

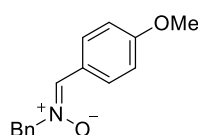

Yield: 99%; white solid;  $R_f = 0.17$  (*n*-hexane/EtOAc 1:1 *v/v*). All spectroscopic data were in accordance with those reported in the literature [1].

### (*Z*)-*N*-Benzyl-1-(4-hydroxyphenyl)methanimine oxide (**4d**)

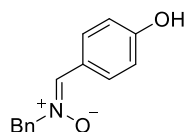

Yield: 91%; white solid;  $R_f = 0.17$  (*n*-hexane/EtOAc 1:3 *v/v*). All spectroscopic data were in accordance with those reported in the literature [2].

### (*Z*)-*N*-Benzyl-1-(4-morpholinophenyl)methanimine oxide (**4e**)

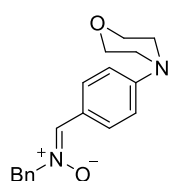

Yield: 99%; m.p. 190–191 °C; white solid;  $R_f = 0.08$  (*n*-hexane/EtOAc 1:2 *v/v*);  $^1\text{H}$  NMR (500 MHz,  $\text{CDCl}_3$ ):  $\delta = 8.16$  (d,  $J = 9.1$  Hz, 2H), 7.48 – 7.45 (m, 2H), 7.42 – 7.35 (m, 3H), 7.27 (s, 1H), 6.86 (d,  $J = 9.1$  Hz, 2H), 5.01 (s, 2H), 3.83 (t,  $J = 4.8$  Hz, 4H), 3.24 (t,  $J = 4.8$  Hz, 4H) ppm;  $^{13}\text{C}$  NMR (125 MHz,  $\text{CDCl}_3$ ):  $\delta = 152.2, 134.2, 133.5, 130.3, 129.1, 128.8, 128.7, 121.5, 113.9, 70.4, 66.6, 47.8$  ppm; FT-IR (neat):  $\nu = 3067, 2955, 2857, 1601, 1506, 1456, 1229, 1154, 1111, 923, 825, 702$   $\text{cm}^{-1}$ ; HRMS (ESI),  $m/z$ :  $[\text{M} + \text{Na}]^+$  calcd for  $\text{C}_{18}\text{H}_{20}\text{N}_2\text{NaO}_2^+$  319.1417; found 319.1410.

### (*Z*)-*N*-Benzyl-1-(4-(trifluoromethyl)phenyl)methanimine oxide (**4f**)

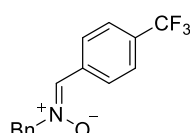

Yield: 99%; white solid;  $R_f = 0.20$  (*n*-hexane/EtOAc 3:1 *v/v*). All spectroscopic data were in accordance with those reported in the literature [1].

**1** He, C.-T.; Han, X.-L.; Zhang, Y.-X.; Du, Z.-T.; Si, C.-M.; Wei, B.-G.  $\text{Sc}(\text{OTf})_3$ -Catalyzed [3 + 2]-Cycloaddition of Nitrones with Ynones. *Org. Biomol. Chem.* **2021**, 19, 457–466.

**2** Bortolini, o.; Mulani, I.; De Niro, A.; Maiuolo, L.; Nardi, M.; Russo, B.; Avnet, S. Efficient Synthesis of Isoxazolidine-Substituted Bisphosphonates By 1,3-Dipolar Cycloaddition Reactions. *Tetrahedron* **2011**, 67, 5635–5641.

(Z)-N-Benzyl-1-(2-(trifluoromethyl)phenyl)methanimine oxide (**4g**)

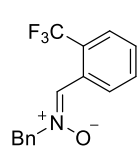

Yield: 98%; white solid; m.p. 54–55 °C;  $R_f$  = 0.25 (*n*-hexane/EtOAc 3:1 *v/v*);  $^1\text{H}$  NMR (500 MHz,  $\text{CDCl}_3$ ):  $\delta$  = 9.40 (d,  $J$  = 8.1 Hz, 1H), 7.74 (s, 1H), 7.69 (d,  $J$  = 7.8 Hz, 1H), 7.62 (t,  $J$  = 7.8 Hz, 1H), 7.50–7.47 (m, 3H), 7.46–7.41 (m, 3H), 5.14 (s, 2H) ppm;  $^{13}\text{C}$  NMR (125 MHz,  $\text{CDCl}_3$ ):  $\delta$  = 133.6, 132.5, 132.1, 129.8, 129.4, 129.3, 129.2, 129.1, 128.8, 127.5, 125.8 (q,  $J$  = 5.8 Hz), 122.8, 72.2 ppm;  $^{19}\text{F}$  NMR (470 MHz,  $\text{CDCl}_3$ ):  $\delta$  = –58.72 ppm; FT-IR (neat):  $\nu$  = 3078, 3034, 1580, 1424, 1316, 1292, 1153, 1107, 1036, 773, 714  $\text{cm}^{-1}$ ; HRMS (ESI),  $m/z$ :  $[\text{M} + \text{Na}]^+$  calcd for  $\text{C}_{15}\text{H}_{12}\text{F}_3\text{NNaO}^+$  302.0763; found 302.0768.

(Z)-N-Benzyl-1-(2-bromophenyl)methanimine oxide (**4h**)

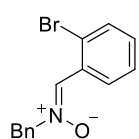

Yield: 98%; white solid;  $R_f$  = 0.31 (*n*-hexane/EtOAc 2:1 *v/v*). All spectroscopic data were in accordance with those reported in the literature [3].

(Z)-N-Benzyl-1-(2-morpholinophenyl)methanimine oxide (**4i**)

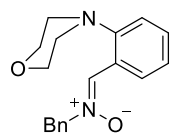

Yield: 99%; white solid; m.p. 144.5–145.5 °C;  $R_f$  = 0.20 (*n*-hexane/EtOAc 1:2 *v/v*);  $^1\text{H}$  NMR (500 MHz,  $\text{CDCl}_3$ ):  $\delta$  = 9.16 (d,  $J$  = 7.9 Hz, 1H), 7.70 (s, 1H), 7.49–7.42 (m, 5H), 7.35 (t,  $J$  = 7.0 Hz, 1H), 7.15 (t,  $J$  = 7.6 Hz, 1H), 7.03 (d,  $J$  = 8.0 Hz, 1H), 5.09 (s, 2H), 3.58 (t,  $J$  = 3.6 Hz, 4H), 2.78 (t,  $J$  = 4.5 Hz, 4H) ppm;  $^{13}\text{C}$  NMR (125 MHz,  $\text{CDCl}_3$ ):  $\delta$  = 151.3, 133.3, 131.2, 130.9, 129.7, 129.2, 128.8, 124.4, 123.9, 118.7, 71.5, 67.0, 53.4 ppm; FT-IR (neat):  $\nu$  = 3092, 2947, 2857, 1585, 1455, 1329, 1223, 1125, 1111, 931, 760, 701  $\text{cm}^{-1}$ ; HRMS (ESI),  $m/z$ :  $[\text{M} + \text{Na}]^+$  calcd for  $\text{C}_{18}\text{H}_{20}\text{N}_2\text{NaO}_2^+$  319.1417; found 319.1427.

(Z)-N-Benzyl-1-(pyridin-3-yl)methanimine oxide (**4j**)

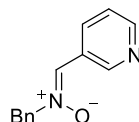

Yield: 98%; white solid; m.p. 95–96 °C;  $R_f$  = 0.12 (*n*-hexane/EtOAc 1:4 *v/v*). All spectroscopic data were in accordance with those reported in the literature [4].

(Z)-N-Benzyl-1-mesitylmethanimine oxide (**4k**)

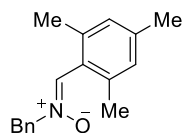

Yield: 85%; white solid; m.p. 144–145 °C;  $R_f$  = 0.24 (*n*-hexane/EtOAc 1:1 *v/v*);  $^1\text{H}$  NMR (500 MHz,  $\text{CDCl}_3$ ):  $\delta$  = 7.62 (s, 1H), 7.54–7.50 (m, 2H), 7.45–7.34 (m, 3H), 6.83 (s, 2H), 5.12 (s, 2H), 2.25 (s, 3H), 2.16 (s, 6H) ppm;  $^{13}\text{C}$  NMR (125 MHz,  $\text{CDCl}_3$ ):  $\delta$  = 139.5, 137.5, 136.4, 133.2, 129.3, 129.0, 128.3, 125.2, 69.9, 21.1, 19.7 ppm; FT-IR (neat):  $\nu$  = 3041, 2971, 2914, 1567, 1456, 1192, 1163, 951, 696  $\text{cm}^{-1}$ ; HRMS (ESI),  $m/z$ :  $[\text{M} + \text{Na}]^+$  calcd for  $\text{C}_{17}\text{H}_{19}\text{NNaO}^+$  276.1359; found 276.1360.

3 Poulsen, P. H.; Vergura, S.; Monleón, A.; Jørgensen, D. K. B.; Jørgensen, K. A. Controlling Asymmetric Remote and Cascade 1,3-Dipolar Cycloaddition Reactions by Organocatalysis. *J. Am. Chem. Soc.* **2016**, *138*, 6412–6415.  
4 Delso, I.; Terejo, T.;  $^1\text{H}$ – $^{15}\text{N}$  HMBC as a Valuable Tool for the Identification and Characterization of Nitrones. *Tetrahedron Lett.* **2007**, *48*, 4101–4104.

(Z)-N-Benzyl-1-(2,6-dichlorophenyl)methanimine oxide (**4l**)

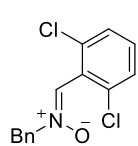

Yield: 99%; white solid; m.p. 164–165 °C;  $R_f$  = 0.34 (*n*-hexane/EtOAc 1:1 v/v);  $^1\text{H}$  NMR (500 MHz,  $\text{CDCl}_3$ ):  $\delta$  = 7.55 – 7.51 (m, 3H), 7.46 – 7.38 (m, 2H), 7.31 (d,  $J$  = 8.0 Hz, 2H), 7.26 – 7.22 (m, 1H), 5.14 (s, 2H) ppm;  $^{13}\text{C}$  NMR (125 MHz,  $\text{CDCl}_3$ ):  $\delta$  = 135.4, 132.5, 130.9, 130.6, 129.5, 129.1, 129.0, 128.1, 127.9, 70.3 ppm; FT-IR (neat):  $\nu$  = 3064, 3028, 2995, 1556, 1430, 1165, 952, 808, 776, 699  $\text{cm}^{-1}$ ; HRMS (ESI),  $m/z$ :  $[\text{M} + \text{Na}]^+$  calcd for  $\text{C}_{14}\text{H}_{11}\text{Cl}_2\text{NNaO}^+$  302.0110; found 302.0101.

(Z)-N-Benzyl-1-(perfluorophenyl)methanimine oxide (**4m**)

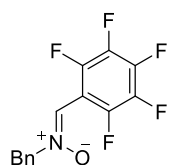

Yield: 97%; white solid;  $R_f$  = 0.28 (*n*-hexane/EtOAc 3:1 v/v). All spectroscopic data were in accordance with those reported in the literature [5].

(Z)-N-Benzyl-1-octylmethanimine oxide (**4n**)

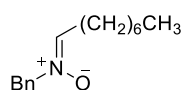

Yield: 93%; white solid;  $R_f$  = 0.11 (*n*-hexane/EtOAc 1:2 v/v). All spectroscopic data were in accordance with those reported in the literature [6].

## 2. Data for compounds 5

Benzaldehyde oxime (**5a**)

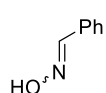

Yield: 99%; white solid;  $R_f$  = 0.4 (*n*-hexane/EtOAc 3:1 v/v). All spectroscopic data were in accordance with those reported in the literature [7].

4-Methylbenzaldehyde oxime (**5b**)

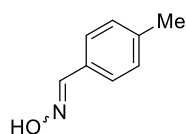

Yield: 98%;  $R_f$  = 0.37 (*n*-hexane/EtOAc 5:1 v/v). All spectroscopic data were in accordance with those reported in the literature [8].

- 
- 5 Chakraborty, B.; Chettri, E. Synthesis of Some Novel Class of Regioselective Spiro Isoxazolidine Derivatives via 1,3-Dipolar Cycloaddition Reaction of *N*-Benzyl-C-fluorosubstituted Phenyl Nitrones in Ionic Liquid. *J. Heterocyclic Chem.* **2018**, 55, 1157–1165.
- 6 Katahara, S.; Kobayashi, S.; Fujita, K.; Matsumoto, T.; Sato, T.; Chida, N. An Iridium-Catalyzed Reductive Approach to Nitrones from *N*-Hydroxyamides. *J. Am. Chem. Soc.* **2016**, 138, 5246–5249.
- 7 Schierle, S.; Neumann, S.; Heitel, P.; Willems, S.; Kaiser, A.; Pollinger, J.; Merk, D. Design and Structural Optimization of Dual FXR/PPAR $\delta$  Activators. *J. Med. Chem.* **2020**, 63, 8369–8379.
- 8 Di Nunno, L.; Vitale, P.; Scilimati, A.; Simone, L.; Capitelli, F. Stereoselective Dimerization of 3-Arylisoxazoles to Cage-Shaped Bis-b-lactams *syn* 2,6-Diaryl-3,7-diazatricyclo[4.2.0.02,5]-octan-4,8-diones Induced by Hindered Lithium Amides. *Tetrahedron* **2007**, 63, 12388–12395.

#### 4-Methoxybenzaldehyde oxime (**5c**)

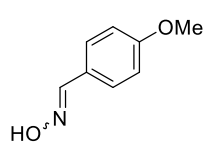

Yield: 96%; white solid;  $R_f = 0.32$  (*n*-hexane/EtOAc 2:1 v/v). All spectroscopic data were in accordance with those reported in the literature [8].

#### 4-(Trifluoromethyl)benzaldehyde oxime (**5d**)

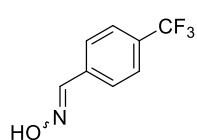

Yield: 98%; white solid;  $R_f = 0.42$  (*n*-hexane/EtOAc 3:1 v/v). All spectroscopic data were in accordance with those reported in the literature [8].

#### 4-Fluorobenzaldehyde oxime (**5e**)

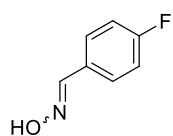

Yield: 99%; white solid;  $R_f = 0.41$  (*n*-hexane/EtOAc 4:1 v/v). All spectroscopic data were in accordance with those reported in the literature [8].

#### 4-(*t*-Butyl)benzaldehyde oxime (**5f**)

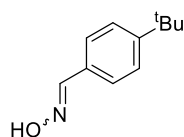

Yield: 93%; white solid;  $R_f = 0.38$  (*n*-hexane/EtOAc 4:1 v/v). All spectroscopic data were in accordance with those reported in the literature [9].

#### 2-Bromobenzaldehyde oxime (**5g**)

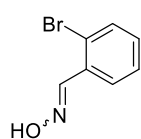

Yield: 97%; white solid;  $R_f = 0.38$  (*n*-hexane/EtOAc 4:1 v/v). All spectroscopic data were in accordance with those reported in the literature [10].

#### 2-(Trifluoromethyl)benzaldehyde oxime (**5h**)

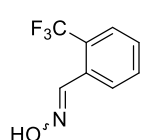

Yield: 96%; white solid;  $R_f = 0.40$  (*n*-hexane/EtOAc 3:1 v/v). All spectroscopic data were in accordance with those reported in the literature [7].

**9** Tambara, K.; Dan Pantos, G. Conversion of Aldoximes into Nitriles and Amides Under Mild Conditions. *Org. Biomol. Chem.*, **2013**, 11, 2466–2472.

**10** Steiger, S. A.; Li, C.; Backos, D. S.; Reigan, P.; Natale, N.R. Dimeric Isoxazolyl-1,4-Dihydropyridines Have Enhanced Binding at the Multi-Drug Resistance Transporter. *Bioorg. Med. Chem.* **2017**, 25, 3223–3234.

### 3-Nitrobenzaldehyde oxime (**5i**)

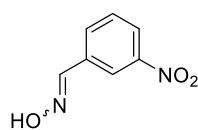

Yield: 99%; white solid;  $R_f$  = 0.23 (*n*-hexane/EtOAc 1:1 v/v). All spectroscopic data were in accordance with those reported in the literature [11].

### 2,4,6-Trimethylbenzaldehyde oxime (**5j**)

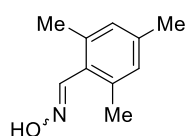

Yield: 97%; white solid;  $R_f$  = 0.43 (*n*-hexane/EtOAc 5:1 v/v). All spectroscopic data were in accordance with those reported in the literature [12].

### 2,3,4,5,6-Pentafluorobenzaldehyde oxime (**5k**)

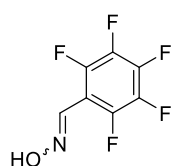

Yield: 90%; white solid;  $R_f$  = 0.52 (*n*-hexane/EtOAc 3:1 v/v). All spectroscopic data were in accordance with those reported in the literature [13].

### 2,6-Dichlorobenzaldehyde oxime (**5l**)

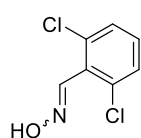

Yield: 99%; white solid;  $R_f$  = 0.54 (*n*-hexane/EtOAc 4:1 v/v). All spectroscopic data were in accordance with those reported in the literature [7].

### 5-Chlorofuran-2-carbaldehyde oxime (**5m**)

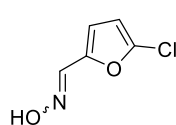

Yield: 88%; white solid;  $R_f$  = 0.43 (*n*-hexane/EtOAc 4:1 v/v). All spectroscopic data were in accordance with those reported in the literature [14].

- 
- 11 Yu, J.; Lu, M. Metal-Free: A Novel and Efficient Aerobic Oxidation of Primary Amines to Oximes Using *N,N',N''*-Trihydroxyisocyanuric Acid and Acetaldoxime as Catalysts in Water. *SYNLETT* **2014**, 25, 1873–1878.
- 12 McIntosh, M. L.; Naffziger, M. R.; Ashburn, B. O.; Zakharov, L. N.; Carter, R. G. Highly Regioselective Nitrile Oxide Dipolar Cycloadditions with *ortho*-Nitrophenyl Alkynes. *Org. Biomol. Chem.* **2012**, 10, 9204–9213.
- 13 Jawalekar, A. M.; Reubsaet, E.; Rutjes F. P. J. T.; van Delft, F. L. Synthesis of Isoxazoles by Hypervalent Iodine-Induced Cycloaddition of Nitrile Oxides to Alkynes. *Chem. Commun.* **2011**, 47, 3198–3200.
- 14 Kanemasa, S.; Matsuda, H.; Kamimurac, A.; Kakinami, T. Synthesis of Hydroximoyl Chlorides from Aldoximes and Benzyltrimethylammonium Tetrachloroiodate (BTMA ICl<sub>4</sub>). *Tetrahedron* **2000**, 56, 1057–1064.

### Thiophene-2-carbaldehyde oxime (**5n**)

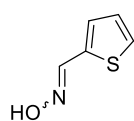

Yield: 83%; white solid;  $R_f$  = 0.43 (*n*-hexane/EtOAc 4:1 *v/v*). All spectroscopic data were in accordance with those reported in the literature [11].

### Octanal oxime (**5o**)

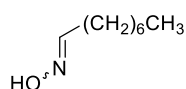

Yield: 94%; white solid;  $R_f$  = 0.39 (*n*-hexane/EtOAc 2:1 *v/v*). All spectroscopic data were in accordance with those reported in the literature [15].

## 3. Data for compounds **6**, **8** and **7**

### (3*R*,3*aR*,8*bS*)-2-Benzyl-3-phenyl-2,3,3*a*,8*b*-tetrahydro-4*H*-indeno[2,1-*d*]isoxazol-4-one (**6a**)

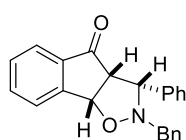

Yield: 50%; white solid; m.p. 159–160 °C;  $R_f$  = 0.38 (*n*-hexane/EtOAc 3:1 *v/v*);  $^1\text{H}$  NMR (500 MHz, DMSO- $d_6$ ):  $\delta$  = 7.79 (tt,  $J$  = 7.9, 1.9 Hz, 1H), 7.70 (d,  $J$  = 7.6 Hz, 1H), 7.59 – 7.52 (m, 2H), 7.28 – 7.15 (m, 6H), 7.09 (t,  $J$  = 6.1 Hz, 4H), 5.75 (d,  $J$  = 6.3 Hz, 1H), 4.20 (d,  $J$  = 9.3 Hz, 1H), 3.85 – 3.78 (m, 2H), 3.71 (d,  $J$  = 15.3 Hz, 1H) ppm;  $^{13}\text{C}$

NMR (125 MHz, DMSO- $d_6$ ):  $\delta$  = 201.7, 153.2, 138.7, 137.9, 136.2, 135.8, 130.0, 128.6, 128.6, 128.31, 128.26, 128.1, 127.1, 126.8, 122.1, 78.4, 73.5, 60.1, 58.5 ppm; FT-IR (neat):  $\nu$  = 3058, 3024, 2855, 1715, 1600, 1495, 1455, 1264, 775, 756, 733, 698  $\text{cm}^{-1}$ ; HRMS (ESI),  $m/z$ :  $[\text{M} + \text{Na}]^+$  calcd for  $\text{C}_{23}\text{H}_{19}\text{NNaO}_2^+$  364.1308; found 364.1300.

### (3*S*,3*aR*,8*bS*)-2-Benzyl-3-phenyl-2,3,3*a*,8*b*-tetrahydro-4*H*-indeno[2,1-*d*]isoxazol-4-one (**7a**)

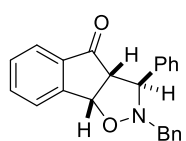

Yield: 40%; white solid; m.p. 190–191 °C;  $R_f$  = 0.50 (*n*-hexane/EtOAc 3:1 *v/v*);  $^1\text{H}$  NMR (500 MHz, DMSO- $d_6$ , 60 °C):  $\delta$  = 7.78 (t,  $J$  = 7.4 Hz, 1H), 7.72 (t,  $J$  = 7.9 Hz, 2H), 7.63 (t,  $J$  = 7.3 Hz, 1H), 7.53 (d,  $J$  = 7.4 Hz, 2H), 7.44 (t,  $J$  = 7.5 Hz, 2H), 7.36 (t,  $J$  = 7.4 Hz, 1H), 7.25 – 7.16 (m, 3H), 7.13 (d,  $J$  = 6.8 Hz, 2H), 5.81 (d,  $J$  = 6.4 Hz, 1H), 4.07

(d,  $J$  = 5.7 Hz, 1H), 3.81 (t,  $J$  = 6.1 Hz, 1H), 3.66 (dd,  $J$  = 14.9, 5.2 Hz, 2H) ppm;  $^{13}\text{C}$  NMR (125 MHz, DMSO- $d_6$ , 60 °C):  $\delta$  = 203.3, 150.8, 138.6, 137.8, 136.5, 135.9, 130.5, 128.8, 128.4, 128.3, 128.2, 128.1, 127.6, 127.0, 123.6, 78.7, 72.2, 63.5, 58.7 ppm; FT-IR (neat):  $\nu$  = 3022, 2915, 2856, 1714, 1604, 1495, 1456, 1348, 1231, 754, 731, 694  $\text{cm}^{-1}$ ; HRMS (ESI),  $m/z$ :  $[\text{M} + \text{Na}]^+$  calcd for  $\text{C}_{23}\text{H}_{19}\text{NNaO}_2^+$  364.1308; found 364.1302.

(3*R*,3*aR*,8*bS*)-2-Benzyl-3-(*p*-tolyl)-2,3,3*a*,8*b*-tetrahydro-4*H*-indeno[2,1-*d'*]isoxazol-4-one (**6b**)

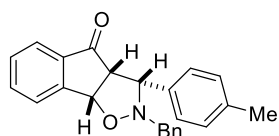

Yield: 40%; white solid; m.p. 145.5–146.5 °C;  $R_f$  = 0.70 (*n*-hexane/EtOAc 4:1 *v/v*);  $^1\text{H}$  NMR (500 MHz, DMSO- $d_6$ ):  $\delta$  = 7.79 (tt,  $J$  = 8.1, 5.8, 2.5 Hz, 1H), 7.70 (d,  $J$  = 7.6 Hz, 1H), 7.59 – 7.54 (m, 2H), 7.23 – 7.15 (m, 3H), 7.10 – 7.06 (m, 4H), 6.96 (d,  $J$  = 8.0 Hz, 2H), 5.73 (d,  $J$  = 6.3 Hz, 1H), 4.14 (d,  $J$  = 9.4 Hz, 1H), 3.80 – 3.76 (m, 2H), 3.67 (d,  $J$  = 15.3 Hz, 1H), 2.26 (s, 3H) ppm;  $^{13}\text{C}$  NMR (125 MHz, DMSO- $d_6$ ):  $\delta$  = 201.9, 153.4, 138.8, 138.0, 137.3, 135.9, 133.1, 130.1, 129.3, 128.6, 128.4, 128.3, 127.2, 126.9, 122.2, 78.4, 73.4, 60.1, 58.4, 21.2 ppm; FT-IR (neat):  $\nu$  = 3024, 2921, 2852, 1712, 1599, 1346, 1213, 1079, 1042, 814, 773, 734, 695  $\text{cm}^{-1}$ ; HRMS (ESI),  $m/z$ :  $[\text{M} + \text{Na}]^+$  calcd for  $\text{C}_{24}\text{H}_{21}\text{NNaO}_2^+$  378.1465; found 378.1472.

(3*S*,3*aR*,8*bS*)-2-Benzyl-3-(*p*-tolyl)-2,3,3*a*,8*b*-tetrahydro-4*H*-indeno[2,1-*d'*]isoxazol-4-one (**7b**)

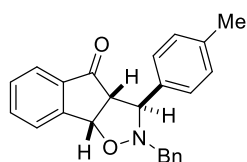

Yield: 37%; white solid; m.p. 159–160 °C;  $R_f$  = 0.58 (*n*-hexane/EtOAc 4:1 *v/v*);  $^1\text{H}$  NMR (500 MHz, DMSO- $d_6$ , 60 °C):  $\delta$  = 7.78 (t,  $J$  = 7.4 Hz, 1H), 7.72 (t,  $J$  = 6.3 Hz, 2H), 7.63 (t,  $J$  = 7.5 Hz, 1H), 7.40 (d,  $J$  = 7.9 Hz, 2H), 7.26 – 7.17 (m, 5H), 7.12 (d,  $J$  = 7.2 Hz, 2H), 5.79 (d,  $J$  = 6.4 Hz, 1H), 4.01 (d,  $J$  = 5.8 Hz, 1H), 3.78 (t,  $J$  = 6.1 Hz, 1H), 3.66 (d,  $J$  = 14.9 Hz, 1H), 3.61 (d,  $J$  = 14.7 Hz, 1H), 2.34 (s, 3H) ppm;  $^{13}\text{C}$  NMR (125 MHz, DMSO- $d_6$ , 60 °C):  $\delta$  = 203.3, 150.8, 137.9, 137.5, 136.5, 135.8, 135.4, 130.5, 129.4, 128.4, 128.3, 128.1, 127.6, 127.0, 123.6, 78.6, 72.1, 63.4, 58.5, 20.9 ppm; FT-IR (neat):  $\nu$  = 3032, 2950, 2843, 1714, 1605, 1350, 1278, 1056, 763, 701  $\text{cm}^{-1}$ ; HRMS (ESI),  $m/z$ :  $[\text{M} + \text{Na}]^+$  calcd for  $\text{C}_{24}\text{H}_{21}\text{NNaO}_2^+$  378.1465; found 378.1470.

(3*R*,3*aR*,8*bS*)-2-Benzyl-3-(4-methoxyphenyl)-2,3,3*a*,8*b*-tetrahydro-4*H*-indeno[2,1-*d'*]isoxazol-4-one (**6c**)

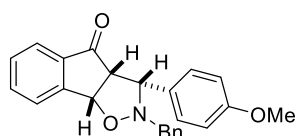

Yield: 47%; white solid; m.p. 130–131 °C;  $R_f$  = 0.43 (*n*-hexane/EtOAc 3:1 *v/v*);  $^1\text{H}$  NMR (500 MHz, DMSO- $d_6$ ):  $\delta$  = 7.82 – 7.77 (m, 1H), 7.71 (d,  $J$  = 7.6 Hz, 1H), 7.56 (d,  $J$  = 4.5 Hz, 2H), 7.24 – 7.15 (m, 3H), 7.09 (d,  $J$  = 8.0 Hz, 2H), 7.00 (d,  $J$  = 8.7 Hz, 2H), 6.83 (d,  $J$  = 8.8 Hz, 2H), 5.73 (d,  $J$  = 6.2 Hz, 1H), 4.13 (d,  $J$  = 9.5 Hz, 1H), 3.81 – 3.74 (m, 2H), 3.72 (s, 3H), 3.66 (d,  $J$  = 15.3 Hz, 1H) ppm;  $^{13}\text{C}$  NMR (125 MHz, DMSO- $d_6$ ):  $\delta$  = 202.0, 159.2, 153.4, 138.8, 138.0, 135.8, 130.1, 129.8, 128.4, 128.3, 127.8, 127.2, 126.9, 122.2, 114.1, 78.3, 73.2, 60.0, 58.4, 55.4 ppm; FT-IR (neat):  $\nu$  = 3024, 3007, 2844, 1711, 1613, 1598, 1514, 1254, 1032, 836, 774, 735  $\text{cm}^{-1}$ ; HRMS (ESI),  $m/z$ :  $[\text{M} + \text{K}]^+$  calcd for  $\text{C}_{24}\text{H}_{21}\text{KNO}_3^+$  433.1045; found 433.1056.

(3*S*,3*aR*,8*bS*)-2-Benzyl-3-(4-methoxyphenyl)-2,3,3*a*,8*b*-tetrahydro-4*H*-indeno[2,1-*d*]isoxazol-4-one  
(7c)

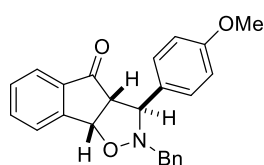

Yield: 24%; white solid; m.p. 127–128 °C;  $R_f$  = 0.60 (*n*-hexane/EtOAc 3:1 v/v);  $^1\text{H}$  NMR (500 MHz, DMSO- $d_6$ , 60 °C):  $\delta$  = 7.78 (t,  $J$  = 7.4 Hz, 1H), 7.72 (t,  $J$  = 6.6 Hz, 2H), 7.62 (t,  $J$  = 7.7 Hz, 1H), 7.43 (d,  $J$  = 8.6 Hz, 2H), 7.25 – 7.16 (m, 3H), 7.13 (d,  $J$  = 7.3 Hz, 2H), 6.99 (d,  $J$  = 8.7 Hz, 2H), 5.79 (d,  $J$  = 6.4 Hz, 1H), 3.99 (br s, 1H), 3.79 (s, 3H), 3.77 (t,  $J$  = 6.1 Hz, 1H), 3.63 (dd,  $J$  = 14.7, 5.3 Hz, 2H) ppm;  $^{13}\text{C}$  NMR (125 MHz, DMSO- $d_6$ , 60 °C):  $\delta$  = 203.3, 159.4, 150.9, 137.9, 136.5, 135.8, 130.5, 130.22, 129.7, 128.3, 128.1, 127.6, 127.0, 123.6, 114.4, 78.6, 71.8, 63.4, 58.4, 55.4 ppm; FT-IR (neat):  $\nu$  = 3032, 2909, 2835, 1718, 1613, 1514, 1248, 1178, 1035, 829, 770, 731  $\text{cm}^{-1}$ ; HRMS (ESI),  $m/z$   $[\text{M} + \text{Na}]^+$  calcd for  $\text{C}_{24}\text{H}_{21}\text{NNaO}_3^+$  394.1414; found 394.1422.

(3*R*,3*aR*,8*bS*)-2-Benzyl-3-(4-hydroxyphenyl)-2,3,3*a*,8*b*-tetrahydro-4*H*-indeno[2,1-*d*]isoxazol-4-one  
(6d)

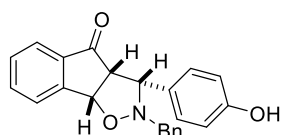

Yield: 45%; white solid; m.p. 202–204 °C;  $R_f$  = 0.28 (*n*-hexane/EtOAc 1:1 v/v);  $^1\text{H}$  NMR (500 MHz, DMSO- $d_6$ ):  $\delta$  = 9.36 (br s, 1H), 7.81 – 7.76 (m, 1H), 7.70 (d,  $J$  = 7.6 Hz, 1H), 7.59 – 7.54 (m, 2H), 7.23 – 7.14 (m, 3H), 7.08 (d,  $J$  = 6.9 Hz, 2H), 6.86 (d,  $J$  = 8.5 Hz, 2H), 6.64 (d,  $J$  = 8.6 Hz, 2H), 5.71 (d,  $J$  = 6.3 Hz, 1H), 4.07 (d,  $J$  = 9.3 Hz, 1H), 3.78 (d,  $J$  = 15.4 Hz, 1H), 3.72 (dd,  $J$  = 9.3, 6.3 Hz, 1H), 3.64 (d,  $J$  = 15.4 Hz, 1H) ppm;  $^{13}\text{C}$  NMR (125 MHz, DMSO- $d_6$ ):  $\delta$  = 202.1, 157.4, 153.5, 138.9, 138.1, 135.8, 130.1, 129.8, 128.4, 128.3, 127.1, 126.9, 126.0, 122.1, 115.5, 78.3, 73.5, 60.0, 58.3 ppm; FT-IR (neat):  $\nu$  = 3284, 3024, 2847, 1694, 1600, 1518, 1454, 1274, 1263, 834, 768, 741, 694  $\text{cm}^{-1}$ ; HRMS (ESI),  $m/z$   $[\text{M} + \text{Na}]^+$  calcd for  $\text{C}_{23}\text{H}_{19}\text{NNaO}_3^+$  380.1257; found 380.1260.

(3*S*,3*aR*,8*bS*)-2-Benzyl-3-(4-hydroxyphenyl)-2,3,3*a*,8*b*-tetrahydro-4*H*-indeno[2,1-*d*]isoxazol-4-one  
(7d)

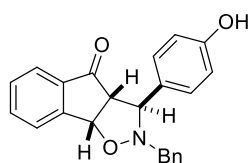

Yield: 26%; white solid; m.p. 189–190 °C;  $R_f$  = 0.40 (*n*-hexane/EtOAc 1:1 v/v);  $^1\text{H}$  NMR (500 MHz, DMSO- $d_6$ , 60 °C):  $\delta$  = 9.33 (br s, 1H), 7.77 (t,  $J$  = 7.4 Hz, 1H), 7.71 (t,  $J$  = 7.1 Hz, 2H), 7.62 (t,  $J$  = 7.5 Hz, 1H), 7.31 (d,  $J$  = 8.4 Hz, 2H), 7.25 – 7.11 (m, 5H), 6.82 (d,  $J$  = 8.4 Hz, 2H), 5.77 (d,  $J$  = 6.4 Hz, 1H), 3.92 (br s, 1H), 3.75 (t,  $J$  = 6.1 Hz, 1H), 3.66 (d,  $J$  = 14.8 Hz, 1H), 3.58 (d,  $J$  = 14.7 Hz, 1H) ppm;  $^{13}\text{C}$  NMR (125 MHz, DMSO- $d_6$ , 60 °C):  $\delta$  = 203.4, 157.5, 150.9, 138.0, 136.5, 135.8, 130.4, 129.7, 128.4, 128.3, 128.1, 127.5, 126.9, 123.6, 115.7, 78.5, 72.0, 63.3, 58.3 ppm; FT-IR (neat):  $\nu$  = 3482, 3024, 2919, 2849, 1699, 1602, 1518, 1348, 1277, 1233, 843, 833, 733, 694  $\text{cm}^{-1}$ ; HRMS (ESI),  $m/z$   $[\text{M} + \text{Na}]^+$  calcd for  $\text{C}_{23}\text{H}_{19}\text{NNaO}_3^+$  380.1257; found 380.1251.

(3*R*,3*aR*,8*bS*)-2-Benzyl-3-(4-morpholinophenyl)-2,3,3*a*,8*b*-tetrahydro-4*H*-indeno[2,1-*d*]isoxazol-4-one  
(**6e**)

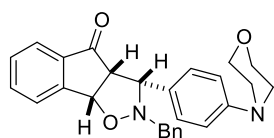

Yield: 43%; white solid; m.p. 151–152 °C;  $R_f$  = 0.34 (*n*-hexane/EtOAc 2:1 *v/v*);  $^1\text{H}$  NMR (500 MHz, DMSO- $d_6$ ):  $\delta$  = 7.79 (ddd,  $J$  = 8.0, 5.6, 2.7 Hz, 1H), 7.70 (d,  $J$  = 7.6 Hz, 1H), 7.59 – 7.54 (m, 2H), 7.23 – 7.15 (m, 3H), 7.08 (d,  $J$  = 6.9 Hz, 2H), 6.93 (d,  $J$  = 8.6 Hz, 2H), 6.82 (d,  $J$  = 8.8 Hz, 2H), 5.71 (d,  $J$  = 6.3 Hz, 1H), 4.08 (d,  $J$  = 9.3 Hz, 1H), 3.77 (d,  $J$  = 15.4 Hz, 1H), 3.74 – 3.69 (m, 5H), 3.64 (d,  $J$  = 15.4 Hz, 1H), 3.11 – 3.04 (m, 4H) ppm;  $^{13}\text{C}$  NMR (125 MHz, DMSO- $d_6$ ):  $\delta$  = 202.0, 153.5, 150.8, 138.8, 138.1, 135.8, 130.0, 129.4, 128.4, 128.2, 127.1, 126.9, 126.0, 122.1, 115.0, 78.3, 73.5, 66.6, 60.0, 58.3, 48.5 ppm; FT-IR (neat):  $\nu$  = 3035, 2950, 2838, 1715, 1612, 1516, 1264, 1234, 1218, 1120, 927, 770, 735  $\text{cm}^{-1}$ ; HRMS (ESI),  $m/z$ :  $[\text{M} + \text{Na}]^+$  calcd for  $\text{C}_{27}\text{H}_{26}\text{N}_2\text{NaO}_3^+$  449.1836; found 449.1832.

(3*S*,3*aR*,8*bS*)-2-Benzyl-3-(4-morpholinophenyl)-2,3,3*a*,8*b*-tetrahydro-4*H*-indeno[2,1-*d*]isoxazol-4-one  
(**7e**)

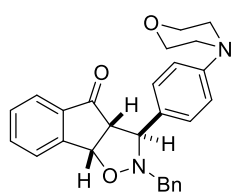

Yield: 26%; white solid; m.p. 219–220 °C;  $R_f$  = 0.53 (*n*-hexane/EtOAc 2:1 *v/v*);  $^1\text{H}$  NMR (500 MHz, DMSO- $d_6$ , 60 °C):  $\delta$  = 7.78 (t,  $J$  = 7.4 Hz, 1H), 7.72 (t,  $J$  = 6.3 Hz, 2H), 7.62 (t,  $J$  = 7.5 Hz, 1H), 7.37 (d,  $J$  = 8.6 Hz, 2H), 7.26 – 7.16 (m, 3H), 7.13 (d,  $J$  = 7.2 Hz, 2H), 6.99 (d,  $J$  = 8.7 Hz, 2H), 5.78 (d,  $J$  = 6.4 Hz, 1H), 3.93 (br s, 1H), 3.78 – 3.74 (m, 4H), 3.67 (d,  $J$  = 14.9 Hz, 1H), 3.59 (d,  $J$  = 14.8 Hz, 1H), 3.15 (d,  $J$  = 5.1 Hz, 4H) ppm;  $^{13}\text{C}$  NMR (125 MHz, DMSO- $d_6$ , 60 °C):  $\delta$  = 203.3, 151.0, 150.9, 138.0, 136.5, 135.8, 130.4, 129.2, 128.4, 128.3, 128.1, 127.5, 126.9, 123.6, 115.2, 78.5, 72.0, 66.4, 63.3, 58.4, 48.6 ppm; FT-IR (neat):  $\nu$  = 3011, 2966, 2837, 1721, 1610, 1521, 1350, 1234, 1122, 926, 821, 742, 688  $\text{cm}^{-1}$ ; HRMS (ESI),  $m/z$ :  $[\text{M} + \text{H}]^+$  calcd for  $\text{C}_{27}\text{H}_{27}\text{N}_2\text{O}_3^+$  427.2016; found 427.2011.

(3*R*,3*aR*,8*bS*)-2-Benzyl-3-(4-(trifluoromethyl)phenyl)-2,3,3*a*,8*b*-tetrahydro-4*H*-indeno[2,1-*d*]isoxazol-4-one  
(**6f**)

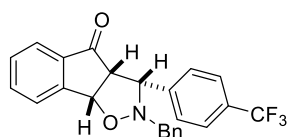

Yield: 54%; white solid; m.p. 145–146 °C;  $R_f$  = 0.47 (*n*-hexane/EtOAc 3:1 *v/v*);  $^1\text{H}$  NMR (500 MHz, DMSO- $d_6$ ):  $\delta$  = 7.80 (ddd,  $J$  = 7.7, 6.2, 2.1 Hz, 1H), 7.72 (d,  $J$  = 7.6 Hz, 1H), 7.64 (d,  $J$  = 8.2 Hz, 2H), 7.58 – 7.53 (m, 2H), 7.33 (d,  $J$  = 8.1 Hz, 2H), 7.24 – 7.16 (m, 3H), 7.13 – 7.10 (m, 2H), 5.80 (d,  $J$  = 6.3 Hz, 1H), 4.36 (d,  $J$  = 9.3 Hz, 1H), 3.92 (dd,  $J$  = 9.3, 6.4 Hz, 1H), 3.84 (d,  $J$  = 15.2 Hz, 1H), 3.75 (d,  $J$  = 15.2 Hz, 1H) ppm;  $^{13}\text{C}$  NMR (125 MHz, DMSO- $d_6$ ):  $\delta$  = 201.5, 153.0, 141.3, 138.5, 137.6, 135.9, 130.1, 129.4, 128.8 (q,  $J$  = 31.6 Hz), 128.5, 128.3, 127.2, 126.9, 125.4 (q,  $J$  = 3.9 Hz), 124.7 (q,  $J$  = 272.1 Hz), 122.3, 78.6, 72.7, 60.2, 58.9 ppm;  $^{19}\text{F}$  NMR (470 MHz,  $\text{CDCl}_3$ ):  $\delta$  = –62.62 (s, 3F) ppm; FT-IR (neat):  $\nu$  = 3034, 2953, 2922, 1721, 1602, 1329, 1163, 1122, 1068, 833, 752, 699, 590, 452  $\text{cm}^{-1}$ ; HRMS (ESI),  $m/z$ :  $[\text{M} + \text{H}]^+$  calcd for  $\text{C}_{24}\text{H}_{19}\text{F}_3\text{NO}_2^+$  410.1362; found 410.1356.

(3*S*,3*aR*,8*bS*)-2-Benzyl-3-(4-(trifluoromethyl)phenyl)-2,3,3*a*,8*b*-tetrahydro-4*H*-indeno[2,1-*d*]isoxazol-4-one (**7f**)

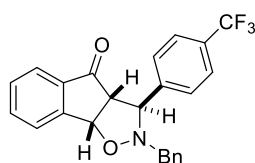

Yield: 24%; white solid; m.p. 170–171 °C;  $R_f$  = 0.66 (*n*-hexane/EtOAc 3:1 *v/v*);  $^1\text{H}$  NMR (500 MHz, DMSO- $d_6$ , 60 °C):  $\delta$  = 7.83 – 7.72 (m, 7H), 7.65 (t,  $J$  = 7.4 Hz, 1H), 7.25 – 7.17 (m, 3H), 7.13 (d,  $J$  = 7.1 Hz, 2H), 5.83 (d,  $J$  = 6.4 Hz, 1H), 4.24 (d,  $J$  = 5.4 Hz, 1H), 3.85 (t,  $J$  = 5.9 Hz, 1H), 3.71 (d,  $J$  = 14.6 Hz, 1H), 3.67 (d,  $J$  = 14.8 Hz, 1H) ppm;  $^{13}\text{C}$  NMR (125 MHz, DMSO- $d_6$ , 60 °C):  $\delta$  = 203.0, 150.8, 143.6, 137.5, 136.4, 136.0, 130.6, 129.1, 128.9 (q,  $J$  = 31.9 Hz), 128.4, 128.2, 127.6, 127.1, 125.7 (q,  $J$  = 3.9 Hz), 124.4 (q,  $J$  = 272.2 Hz), 123.7, 78.9, 71.4, 63.6, 59.1 ppm;  $^{19}\text{F}$  NMR (470 MHz, CDCl<sub>3</sub>):  $\delta$  = –62.61 (s, 3F) ppm; FT-IR (neat):  $\nu$  = 3035, 2955, 2850, 1715, 1607, 1331, 1159, 1111, 1068, 855, 762, 703, 463  $\text{cm}^{-1}$ ; HRMS (ESI),  $m/z$ :  $[\text{M} + \text{Na}]^+$  calcd for  $\text{C}_{24}\text{H}_{18}\text{F}_3\text{NNaO}_2^+$  432.1182; found 432.1189.

(3*R*,3*aR*,8*bS*)-2-Benzyl-3-(2-(trifluoromethyl)phenyl)-2,3,3*a*,8*b*-tetrahydro-4*H*-indeno[2,1-*d*]isoxazol-4-one (**6g**)

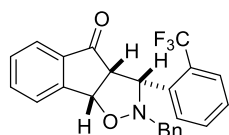

Yield: 31%; white solid; m.p. 155–157 °C;  $R_f$  = 0.54 (*n*-hexane/EtOAc 4:1 *v/v*);  $^1\text{H}$  NMR (500 MHz, DMSO- $d_6$ ):  $\delta$  = 7.81 (td,  $J$  = 7.5, 7.0, 1.3 Hz, 1H), 7.78 – 7.72 (m, 2H), 7.60 – 7.52 (m, 2H), 7.48 – 7.43 (m, 2H), 7.23 – 7.09 (m, 6H), 5.82 (d,  $J$  = 6.3 Hz, 1H), 4.40 (d,  $J$  = 9.2 Hz, 1H), 3.84 – 3.80 (m, 2H), 3.76 (d,  $J$  = 15.0 Hz, 1H) ppm;  $^{13}\text{C}$  NMR (125 MHz, DMSO- $d_6$ ):  $\delta$  = 201.0, 153.0, 138.5, 137.2, 135.7, 134.6 (d,  $J$  = 1.5 Hz), 132.5, 130.0, 128.9, 128.4, 128.11, 128.09, 128.0 (q,  $J$  = 29.6 Hz), 127.0, 126.7, 126.0 (q,  $J$  = 5.7 Hz), 124.6 (q,  $J$  = 274.0 Hz), 122.0, 78.4, 69.1, 60.0, 58.6 ppm;  $^{19}\text{F}$  NMR (470 MHz, CDCl<sub>3</sub>):  $\delta$  = –58.78 (s, 3F) ppm; FT-IR (neat):  $\nu$  = 3021, 2945, 2883, 1716, 1653, 1455, 1313, 1261, 1165, 1103, 1033, 785, 748, 701, 660  $\text{cm}^{-1}$ ; HRMS (ESI),  $m/z$ :  $[\text{M} + \text{Na}]^+$  calcd for  $\text{C}_{24}\text{H}_{18}\text{F}_3\text{NNaO}_2^+$  432.1182; found 432.1181.

(3*S*,3*aR*,8*bS*)-2-Benzyl-3-(2-(trifluoromethyl)phenyl)-2,3,3*a*,8*b*-tetrahydro-4*H*-indeno[2,1-*d*]isoxazol-4-one (**7g**)

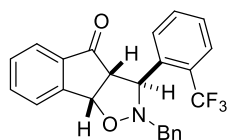

Yield: 24%; white solid; m.p. 152–153 °C;  $R_f$  = 0.43 (*n*-hexane/EtOAc 4:1 *v/v*);  $^1\text{H}$  NMR (500 MHz, DMSO- $d_6$ , 60 °C):  $\delta$  = 8.07 (d,  $J$  = 7.9 Hz, 1H), 7.83 – 7.73 (m, 5H), 7.65 (t,  $J$  = 7.5 Hz, 1H), 7.58 (t,  $J$  = 7.6 Hz, 1H), 7.24 – 7.16 (m, 3H), 7.07 (d,  $J$  = 6.8 Hz, 2H), 5.90 (d,  $J$  = 6.5 Hz, 1H), 4.48 (d,  $J$  = 3.8 Hz, 1H), 3.92 (t,  $J$  = 5.8 Hz, 1H), 3.65 (d,  $J$  = 14.3 Hz, 1H), 3.61 (d,  $J$  = 14.4 Hz, 1H) ppm;  $^{13}\text{C}$  NMR (125 MHz, DMSO- $d_6$ , 60 °C):  $\delta$  = 202.1, 151.1, 138.1 (d,  $J$  = 1.8 Hz), 137.7, 136.4, 136.3, 133.4, 130.9, 130.7, 128.9, 128.6, 128.4, 127.9 (q,  $J$  = 29.6 Hz), 127.8, 127.4, 126.2 (q,  $J$  = 5.9 Hz), 124.6 (q,  $J$  = 274.7 Hz), 124.0, 79.7, 67.7, 64.9, 59.7 ppm;  $^{19}\text{F}$  NMR (470 MHz, CDCl<sub>3</sub>):  $\delta$  = –56.83 (s, 3F) ppm; FT-IR (neat):  $\nu$  = 3021, 2925, 2874, 1716, 1647, 1456, 1312, 1277, 1162, 1121, 1034, 769, 694, 666  $\text{cm}^{-1}$ ; HRMS (ESI),  $m/z$ :  $[\text{M} + \text{Na}]^+$  calcd for  $\text{C}_{24}\text{H}_{18}\text{F}_3\text{NNaO}_2^+$  432.1182; found 432.1186.

(3*R*,3*aS*,8*aR*)-2-Benzyl-3-(2-(trifluoromethyl)phenyl)-2,3,3*a*,8*a*-tetrahydro-8*H*-indeno[1,2-*d*]isoxazol-8-one (**8g**)

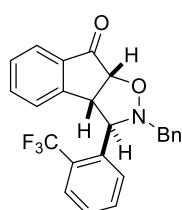

Yield: 16%; white solid; m.p. 165–166 °C;  $R_f$  = 0.22 (*n*-hexane/DCM 1:1 *v/v*);  $^1\text{H}$  NMR (500 MHz,  $\text{DMSO-}d_6$ , 60 °C):  $\delta$  = 8.07 (d,  $J$  = 7.9 Hz, 1H), 7.86 – 7.74 (m, 4H), 7.63 – 7.56 (m, 2H), 7.44 (d,  $J$  = 7.7 Hz, 1H), 7.25 – 7.17 (m, 3H), 7.09 (d,  $J$  = 7.1 Hz, 2H), 5.02 (d,  $J$  = 6.8 Hz, 1H), 4.51 (dd,  $J$  = 6.8, 4.3 Hz, 1H), 4.40 (d,  $J$  = 2.8 Hz, 1H), 3.65 (d,  $J$  = 14.4 Hz, 1H), 3.57 (d,  $J$  = 14.4 Hz, 1H) ppm;  $^{13}\text{C}$  NMR (125 MHz,  $\text{DMSO-}d_6$ , 60 °C):  $\delta$  = 201.2, 152.9, 137.9, 137.3, 136.6, 135.1, 133.4, 130.4, 129.4, 128.7, 128.3, 128.2, 127.4 (q,  $J$  = 29.3 Hz), 127.2, 126.8, 125.9 (q,  $J$  = 5.8 Hz), 124.5 (q,  $J$  = 274.4 Hz), 124.2, 81.8, 70.2, 59.3, 57.5 ppm;  $^{19}\text{F}$  NMR (470 MHz,  $\text{CDCl}_3$ ):  $\delta$  = –56.71 (s, 3F) ppm; FT-IR (neat):  $\nu$  = 2934, 1717, 1647, 1541, 1465, 1311, 1161, 1121, 825, 779, 697, 668  $\text{cm}^{-1}$ ; HRMS (ESI),  $m/z$ :  $[\text{M} + \text{K}]^+$  calcd for  $\text{C}_{24}\text{H}_{18}\text{F}_3\text{KNO}_2^+$  448.0921; found 448.0930.

(3*R*,3*aR*,8*bS*)-2-Benzyl-3-(2-bromophenyl)-2,3,3*a*,8*b*-tetrahydro-4*H*-indeno[2,1-*d*]isoxazol-4-one (**6h**)

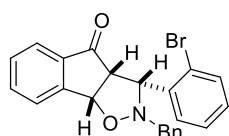

Yield: 28%; white solid; m.p. 139–140 °C;  $R_f$  = 0.54 (*n*-hexane/THF 20:1 *v/v*);  $^1\text{H}$  NMR (500 MHz,  $\text{DMSO-}d_6$ ):  $\delta$  = 7.79 (t,  $J$  = 7.4 Hz, 1H), 7.73 (d,  $J$  = 7.6 Hz, 1H), 7.68 – 7.64 (m, 1H), 7.55 (t,  $J$  = 7.3 Hz, 1H), 7.49 (d,  $J$  = 7.5 Hz, 1H), 7.25 – 7.17 (m, 5H), 7.12 (d,  $J$  = 7.0 Hz, 2H), 6.91 – 6.88 (m, 1H), 5.81 (d,  $J$  = 6.4 Hz, 1H), 4.43 (d,  $J$  = 9.3 Hz, 1H), 3.96 – 3.90 (m, 2H), 3.78 (d,  $J$  = 15.2 Hz, 1H) ppm;  $^{13}\text{C}$  NMR (125 MHz,  $\text{DMSO-}d_6$ ):  $\delta$  = 200.8, 152.9, 138.3, 137.1, 135.6, 135.4, 132.8, 129.9, 129.6, 128.7, 128.3, 128.1, 127.8, 127.0, 126.7, 124.2, 121.9, 78.1, 71.9, 58.5, 57.5 ppm; FT-IR (neat):  $\nu$  = 3026, 2945, 2868, 1712, 1602, 1260, 1221, 1015, 766, 748, 697, 620  $\text{cm}^{-1}$ ; HRMS (ESI),  $m/z$ :  $[\text{M} + \text{H}]^+$  calcd for  $\text{C}_{23}\text{H}_{19}\text{BrNO}_2^+$  420.0594; found 420.0596.

(3*S*,3*aR*,8*bS*)-2-Benzyl-3-(2-bromophenyl)-2,3,3*a*,8*b*-tetrahydro-4*H*-indeno[2,1-*d*]isoxazol-4-one (**7h**)

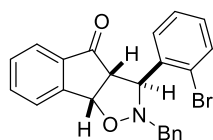

Yield: 20%; white solid; m.p. 148–150 °C;  $R_f$  = 0.52 (*n*-hexane/THF 20:1 *v/v*);  $^1\text{H}$  NMR (500 MHz,  $\text{DMSO-}d_6$ , 60 °C):  $\delta$  = 7.82 – 7.72 (m, 4H), 7.68 – 7.62 (m, 2H), 7.48 (t,  $J$  = 7.5 Hz, 1H), 7.29 (td,  $J$  = 7.7, 1.7 Hz, 1H), 7.23 – 7.15 (m, 3H), 7.06 (d,  $J$  = 6.9 Hz, 2H), 5.86 (d,  $J$  = 6.5 Hz, 1H), 4.70 (d,  $J$  = 4.6 Hz, 1H), 3.91 (dd,  $J$  = 6.5, 4.7 Hz, 1H), 3.71 (d,  $J$  = 14.2 Hz, 1H), 3.64 (d,  $J$  = 14.4 Hz, 1H). ppm;  $^{13}\text{C}$  NMR (125 MHz,  $\text{DMSO-}d_6$ , 60 °C):  $\delta$  = 202.7, 151.3, 137.7, 137.4, 136.3, 136.0, 133.1, 130.6, 130.3, 130.0, 128.4, 128.3, 128.1, 127.6, 127.1, 123.8, 123.7, 79.3, 70.5, 63.6, 59.4 ppm; FT-IR (neat):  $\nu$  = 3028, 2919, 2870, 1715, 1600, 1472, 1347, 1276, 1233, 1022, 844, 752, 743, 698, 618  $\text{cm}^{-1}$ ; HRMS (ESI),  $m/z$ :  $[\text{M} + \text{H}]^+$  calcd for  $\text{C}_{23}\text{H}_{19}\text{BrNO}_2^+$  420.0594; found 420.0596.

(3*R*,3*aS*,8*aR*)-2-Benzyl-3-(2-bromophenyl)-2,3,3*a*,8*a*-tetrahydro-8*H*-indeno[1,2-*d*]isoxazol-8-one (**8h**)

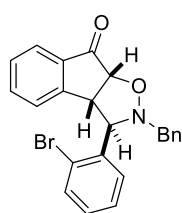

Yield: 23%; white solid; m.p. 123–124 °C;  $R_f$  = 0.30 (DCM);  $^1\text{H}$  NMR (500 MHz,  $\text{DMSO-}d_6$ , 60 °C):  $\delta$  = 7.84 – 7.78 (m, 2H), 7.77 – 7.71 (m, 2H), 7.69 (d,  $J$  = 8.0 Hz, 1H), 7.58 (t,  $J$  = 7.4 Hz, 1H), 7.51 (t,  $J$  = 7.5 Hz, 1H), 7.31 (td,  $J$  = 7.7, 1.7 Hz, 1H), 7.25 – 7.17 (m, 3H), 7.08 (d,  $J$  = 7.0 Hz, 2H), 4.92 (d,  $J$  = 6.8 Hz, 1H), 4.66 (d,  $J$  = 3.6 Hz, 1H), 4.46 (dd,  $J$  = 6.9, 3.7 Hz, 1H), 3.71 (d,  $J$  = 14.2 Hz, 1H), 3.62 (d,  $J$  = 14.2 Hz, 1H) ppm;  $^{13}\text{C}$  NMR (125 MHz,  $\text{DMSO-}d_6$ , 60 °C):  $\delta$  = 201.6, 153.6, 138.5, 137.2, 136.6, 135.2, 133.0, 130.0, 130.0, 129.3, 128.5, 128.4, 128.2, 127.2, 127.1, 124.2, 123.4, 81.9, 73.0, 59.8, 56.7 ppm; FT-IR (neat):  $\nu$  = 3027, 2934, 2896, 1721, 1603, 1472, 1251, 1020, 764, 752, 697, 634  $\text{cm}^{-1}$ ; HRMS (ESI),  $m/z$ :  $[\text{M} + \text{Na}]^+$  calcd for  $\text{C}_{23}\text{H}_{18}\text{BrNNaO}_2^+$  442.0413; found 442.0420.

(3*R*,3*aR*,8*bS*)-2-Benzyl-3-(2-morpholinophenyl)-2,3,3*a*,8*b*-tetrahydro-4*H*-indeno[2,1-*d*]isoxazol-4-one (**6i**)

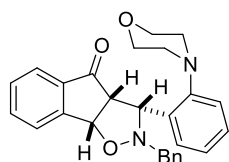

Yield: 42%; white solid; m.p. 186–187 °C;  $R_f$  = 0.31 (*n*-hexane/EtOAc 3:1 *v/v*);  $^1\text{H}$  NMR (500 MHz,  $\text{DMSO-}d_6$ ):  $\delta$  = 7.80 (td,  $J$  = 7.3, 1.3 Hz, 1H), 7.73 (d,  $J$  = 7.6 Hz, 1H), 7.55 (t,  $J$  = 7.2 Hz, 1H), 7.51 (d,  $J$  = 7.5 Hz, 1H), 7.29 – 7.17 (m, 5H), 7.10 (d,  $J$  = 6.6 Hz, 2H), 6.92 (td,  $J$  = 7.5, 1.3 Hz, 1H), 6.78 (dd,  $J$  = 7.8, 1.6 Hz, 1H), 5.78 (d,  $J$  = 6.3 Hz, 1H), 4.69 (d,  $J$  = 9.6 Hz, 1H), 3.88 (dd,  $J$  = 9.6, 6.3 Hz, 1H), 3.82 (d,  $J$  = 15.1 Hz, 1H), 3.80 – 3.72 (m, 4H), 3.67 (d,  $J$  = 15.1 Hz, 1H), 3.08 – 3.03 (m, 2H), 2.81 – 2.76 (m, 2H) ppm;  $^{13}\text{C}$  NMR (125 MHz,  $\text{DMSO-}d_6$ ):  $\delta$  = 201.8, 153.4, 152.3, 138.7, 137.5, 135.7, 132.5, 129.9, 128.6, 128.5, 128.2, 127.8, 127.1, 126.8, 124.7, 122.1, 121.8, 78.4, 67.2, 67.1, 58.9, 58.3, 53.5 ppm; FT-IR (neat):  $\nu$  = 3030, 2944, 2842, 1715, 1599, 1490, 1454, 1222, 1117, 1080, 928, 742, 704  $\text{cm}^{-1}$ ; HRMS (ESI),  $m/z$ :  $[\text{M} + \text{Na}]^+$  calcd for  $\text{C}_{27}\text{H}_{26}\text{N}_2\text{NaO}_3^+$  449.1836; found 449.1842.

(3*S*,3*aR*,8*bS*)-2-Benzyl-3-(2-morpholinophenyl)-2,3,3*a*,8*b*-tetrahydro-4*H*-indeno[2,1-*d*]isoxazol-4-one (**7i**)

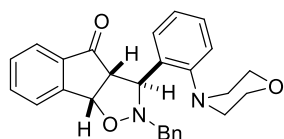

Yield: 34%; white solid; m.p. 183–184 °C;  $R_f$  = 0.51 (*n*-hexane/EtOAc 3:1 *v/v*);  $^1\text{H}$  NMR (500 MHz,  $\text{DMSO-}d_6$ , 60 °C):  $\delta$  7.80 (t,  $J$  = 7.4 Hz, 1H), 7.77 – 7.71 (m, 3H), 7.64 (t,  $J$  = 7.4 Hz, 1H), 7.35 (t,  $J$  = 7.6 Hz, 1H), 7.27 – 7.14 (m, 5H), 7.01 (d,  $J$  = 6.9 Hz, 2H), 5.86 (d,  $J$  = 6.4 Hz, 1H), 4.94 (d,  $J$  = 4.6 Hz, 1H), 3.84 (dd,  $J$  = 6.5, 4.6 Hz, 1H), 3.74 – 3.59 (m, 6H), 3.06 – 3.02 (m, 2H), 2.68 – 2.63 (m, 2H) ppm;  $^{13}\text{C}$  NMR (125 MHz,  $\text{DMSO-}d_6$ , 60 °C):  $\delta$  = 203.8, 151.9, 151.5, 137.8, 136.6, 135.9, 134.7, 130.5, 129.1, 128.9, 128.4, 128.1, 127.6, 127.0, 124.9, 123.5, 121.4, 79.2, 66.8, 65.4, 63.6, 59.0, 53.4 ppm; FT-IR (neat):  $\nu$  = 3031, 2892, 2823, 1715, 1598, 1491, 1452, 1294, 1114, 1068, 933, 749, 735  $\text{cm}^{-1}$ ; HRMS (ESI),  $m/z$ :  $[\text{M} + \text{Na}]^+$  calcd for  $\text{C}_{27}\text{H}_{26}\text{N}_2\text{NaO}_3^+$  449.1836; found 449.1833.

(3*R*,3*aR*,8*bS*)-2-Benzyl-3-(pyridin-3-yl)-2,3,3*a*,8*b*-tetrahydro-4*H*-indeno[2,1-*d*]isoxazol-4-one (**6j**)

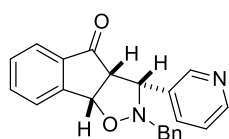

Yield: 55%; white solid; m.p. 149–150 °C;  $R_f$  = 0.23 (*n*-hexane/EtOAc 1:2 *v/v*);  $^1\text{H}$  NMR (500 MHz, DMSO- $d_6$ ):  $\delta$  = 8.44 (dd,  $J$  = 4.8, 1.6 Hz, 1H), 8.34 (d,  $J$  = 2.2 Hz, 1H), 7.81 (td,  $J$  = 7.3, 6.5, 1.9 Hz, 1H), 7.72 (d,  $J$  = 7.6 Hz, 1H), 7.59 – 7.54 (m, 2H), 7.38 (dt,  $J$  = 8.0, 1.9 Hz, 1H), 7.29 – 7.16 (m, 4H), 7.11 (d,  $J$  = 7.0 Hz, 2H), 5.81 (d,  $J$  = 6.3 Hz, 1H), 4.32 (d,  $J$  = 9.2 Hz, 1H), 3.92 (dd,  $J$  = 9.3, 6.7 Hz, 1H), 3.84 (d,  $J$  = 15.1 Hz, 1H), 3.78 (d,  $J$  = 15.1 Hz, 1H) ppm;  $^{13}\text{C}$  NMR (125 MHz, DMSO- $d_6$ ):  $\delta$  = 202.0, 153.1, 149.9, 149.4, 138.5, 137.6, 136.2, 136.1, 132.2, 130.3, 128.48, 128.45, 127.3, 127.0, 123.8, 122.3, 78.6, 70.9, 60.1, 58.8 ppm; FT-IR (neat):  $\nu$  = 3029, 2942, 2844, 1715, 1604, 1424, 1338, 1230, 1023, 967, 874, 766, 750, 719, 700  $\text{cm}^{-1}$ ; HRMS (ESI),  $m/z$ :  $[\text{M} + \text{K}]^+$  calcd for  $\text{C}_{22}\text{H}_{18}\text{KN}_2\text{O}_2^+$  381.1000; found 381.1010.

(3*S*,3*aR*,8*bS*)-2-Benzyl-3-(pyridin-3-yl)-2,3,3*a*,8*b*-tetrahydro-4*H*-indeno[2,1-*d*]isoxazol-4-one (**7j**)

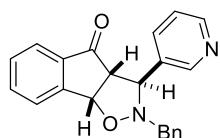

Yield: 27%; white solid; m.p. 172–173 °C;  $R_f$  = 0.34 (*n*-hexane/EtOAc 1:2 *v/v*);  $^1\text{H}$  NMR (500 MHz, DMSO- $d_6$ , 60 °C):  $\delta$  = 8.69 (d,  $J$  = 2.2 Hz, 1H), 8.57 (dd,  $J$  = 4.8, 1.6 Hz, 1H), 7.91 (dt,  $J$  = 7.9, 2.0 Hz, 1H), 7.80 (td,  $J$  = 7.4, 1.2 Hz, 1H), 7.77 – 7.73 (m, 2H), 7.64 (t,  $J$  = 7.5 Hz, 1H), 7.45 (dd,  $J$  = 7.8, 4.7 Hz, 1H), 7.24 – 7.16 (m, 3H), 7.10 (d,  $J$  = 7.1 Hz, 2H), 5.86 (d,  $J$  = 6.4 Hz, 1H), 4.22 (d,  $J$  = 5.2 Hz, 1H), 3.88 (dd,  $J$  = 6.5, 5.2 Hz, 1H), 3.70 (d,  $J$  = 14.5 Hz, 1H), 3.64 (d,  $J$  = 14.7 Hz, 1H) ppm;  $^{13}\text{C}$  NMR (125 MHz, DMSO- $d_6$ , 60 °C):  $\delta$  = 203.1, 150.9, 149.7, 149.5, 137.5, 136.5, 136.0, 136.0, 134.1, 130.6, 128.4, 128.2, 127.6, 127.1, 123.9, 123.6, 78.8, 69.7, 63.2, 58.7 ppm; FT-IR (neat):  $\nu$  = 3022, 2918, 2856, 1715, 1604, 1426, 1348, 1277, 1029, 944, 840, 762, 733, 715, 696  $\text{cm}^{-1}$ ; HRMS (ESI),  $m/z$ :  $[\text{M} + \text{Na}]^+$  calcd for  $\text{C}_{22}\text{H}_{18}\text{N}_2\text{NaO}_2^+$  365.1260; found 365.1267.

(3*R*,3*aR*,8*bS*)-2-Benzyl-3-mesityl-2,3,3*a*,8*b*-tetrahydro-4*H*-indeno[2,1-*d*]isoxazol-4-one (**6k**)

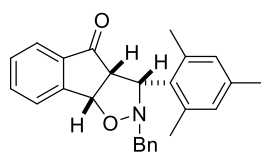

Yield: 32%; white solid; m.p. 177–178 °C;  $R_f$  = 0.68 (*n*-hexane/EtOAc 3:1 *v/v*);  $^1\text{H}$  NMR (500 MHz, DMSO- $d_6$ ):  $\delta$  = 7.78 – 7.70 (m, 3H), 7.63 (t,  $J$  = 7.3 Hz, 1H), 7.28 – 7.24 (m, 2H), 7.22 – 7.18 (m, 3H), 6.90 (s, 2H), 5.79 (d,  $J$  = 6.2 Hz, 1H), 4.23 (d,  $J$  = 8.1 Hz, 1H), 4.01 (dd,  $J$  = 8.1, 6.2 Hz, 1H), 3.70 (d,  $J$  = 14.8 Hz, 1H), 3.64 (d,  $J$  = 14.8 Hz, 1H), 2.54 (br s, 6H), 2.24 (s, 3H) ppm;  $^{13}\text{C}$  NMR (125 MHz, DMSO- $d_6$ ):  $\delta$  = 204.0, 149.9, 138.2, 137.7, 137.0, 136.3, 135.7, 130.7, 130.3, 129.9, 128.3, 128.2, 127.7, 127.0, 124.0, 78.8, 69.0, 61.2, 59.7, 21.1, 20.6 ppm; FT-IR (neat):  $\nu$  = 3023, 2926, 2871, 1714, 1605, 1494, 1350, 1278, 1232, 1059, 941, 863, 762, 720  $\text{cm}^{-1}$ ; HRMS (ESI),  $m/z$ :  $[\text{M} + \text{Na}]^+$  calcd for  $\text{C}_{26}\text{H}_{25}\text{NNaO}_2^+$  406.1778; found 406.1780.

(3*S*,3*aR*,8*bS*)-2-Benzyl-3-mesityl-2,3,3*a*,8*b*-tetrahydro-4*H*-indeno[2,1-*d*]isoxazol-4-one (**7k**)

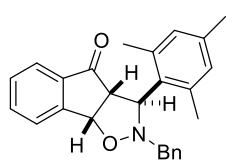

Yield: 20%; white solid; m.p. 191–192 °C;  $R_f$  = 0.48 (*n*-hexane/EtOAc 3:1 *v/v*);  $^1\text{H}$  NMR (500 MHz, DMSO- $d_6$ , 60 °C):  $\delta$  = 7.81 (td,  $J$  = 7.4, 1.4 Hz, 1H), 7.74 (d,  $J$  = 7.6 Hz, 1H), 7.62 – 7.55 (m, 2H), 7.23 – 7.16 (m, 3H), 7.09 (d,  $J$  = 6.9 Hz, 2H), 6.89 (s, 1H), 6.66 (s, 1H), 5.72 (d,  $J$  = 6.4 Hz, 1H), 4.33 (d,  $J$  = 9.1 Hz, 1H), 3.83 (d,  $J$  = 15.5 Hz, 1H), 3.77 (dd,  $J$  = 9.1, 6.4 Hz, 1H), 3.60 (d,  $J$  = 15.6 Hz, 1H), 2.38 (s, 3H), 2.20 (s, 3H), 1.80 (s, 3H) ppm;  $^{13}\text{C}$  NMR (125 MHz, DMSO- $d_6$ , 60 °C):  $\delta$  = 201.3, 153.2, 138.8, 137.5, 137.4, 137.2, 136.2, 135.5, 130.9, 129.8, 129.1, 128.04, 128.00, 127.9, 126.8, 126.7, 121.9, 77.5, 72.0, 58.4, 56.9, 21.9, 20.9, 20.5 ppm; FT-IR (neat):  $\nu$  = 3025, 2916, 2859, 1717, 1653, 1559, 1496, 1464, 1259, 1077, 866, 760, 728  $\text{cm}^{-1}$ ; HRMS (ESI),  $m/z$ :  $[\text{M} + \text{Na}]^+$  calcd for  $\text{C}_{26}\text{H}_{25}\text{NNaO}_2^+$  406.1778; found 406.1777.

(3*R*,3*aR*,8*bS*)-2-Benzyl-3-(2,6-dichlorophenyl)-2,3,3*a*,8*b*-tetrahydro-4*H*-indeno[2,1-*d*]isoxazol-4-one (**6l**)

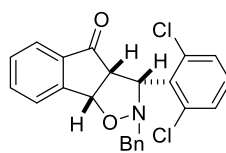

Yield: 40%; white solid; m.p. 193–194 °C;  $R_f$  = 0.54 (*n*-hexane/EtOAc 4:1 *v/v*);  $^1\text{H}$  NMR (500 MHz, DMSO- $d_6$ ):  $\delta$  = 7.80 – 7.73 (m, 3H), 7.65 (td,  $J$  = 7.5, 1.2 Hz, 1H), 7.52 (d,  $J$  = 8.0 Hz, 2H), 7.38 (dd,  $J$  = 8.5, 7.6 Hz, 1H), 7.23 – 7.14 (m, 5H), 5.87 (d,  $J$  = 6.1 Hz, 1H), 4.66 (d,  $J$  = 7.5 Hz, 1H), 4.31 (dd,  $J$  = 7.6, 6.1 Hz, 1H), 3.80 (d,  $J$  = 14.4 Hz, 1H), 3.70 (d,  $J$  = 14.3 Hz, 1H) ppm;  $^{13}\text{C}$  NMR (125 MHz, DMSO- $d_6$ ):  $\delta$  = 203.5, 149.7, 137.7, 136.4, 136.2, 131.4, 131.3, 131.2, 128.6, 128.4, 128.1, 127.5, 124.5, 79.4, 68.8, 60.9, 60.7 ppm; FT-IR (neat):  $\nu$  = 3031, 2898, 2874, 1713, 1610, 1566, 1428, 1288, 1185, 945, 843, 785, 760, 740, 607  $\text{cm}^{-1}$ ; HRMS (ESI),  $m/z$ :  $[\text{M} + \text{Na}]^+$  calcd for  $\text{C}_{23}\text{H}_{17}\text{Cl}_2\text{NNaO}_2^+$  432.0529; found 432.0536.

(3*R*,3*aR*,8*bS*)-2-Benzyl-3-(perfluorophenyl)-2,3,3*a*,8*b*-tetrahydro-4*H*-indeno[2,1-*d*]isoxazol-4-one (**6m**)

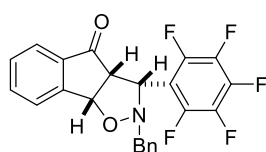

Yield: 18%; white solid; m.p. 163–164 °C;  $R_f$  = 0.51 (*n*-hexane/EtOAc 3:1 *v/v*);  $^1\text{H}$  NMR (500 MHz, DMSO- $d_6$ ):  $\delta$  = 7.82 (t,  $J$  = 7.4 Hz, 1H), 7.74 (d,  $J$  = 7.6 Hz, 1H), 7.66 (d,  $J$  = 7.6 Hz, 1H), 7.59 (t,  $J$  = 7.4 Hz, 1H), 7.20 – 7.13 (m, 3H), 7.10 – 7.05 (m, 2H), 5.81 (d,  $J$  = 6.4 Hz, 1H), 4.44 (d,  $J$  = 8.9 Hz, 1H), 3.95 (d,  $J$  = 14.4 Hz, 1H), 3.89 – 3.85 (m, 2H) ppm;  $^{13}\text{C}$  NMR (125 MHz, DMSO- $d_6$ ):  $\delta$  = 202.1, 152.6, 138.3, 136.8, 136.3, 130.3, 128.8, 128.3, 127.5, 127.3, 122.5, 78.3, 64.8, 59.8, 57.8 ppm;  $^{19}\text{F}$  NMR (470 MHz, CDCl<sub>3</sub>):  $\delta$  = –130.34 (d,  $J$  = 21.7 Hz, 1F), –141.56 (d,  $J$  = 22.5 Hz, 1F), –153.39 (t,  $J$  = 20.9 Hz, 1F), –161.33 (t,  $J$  = 18.4 Hz, 1F), –162.11 (t,  $J$  = 17.7 Hz, 1F) ppm; FT-IR (neat):  $\nu$  = 3025, 2918, 2847, 1706, 1652, 1604, 1522, 1500, 1364, 1270, 1030, 1012, 980, 773, 761, 711, 673  $\text{cm}^{-1}$ ; HRMS (ESI),  $m/z$ :  $[\text{M} + \text{Na}]^+$  calcd for  $\text{C}_{23}\text{H}_{14}\text{F}_5\text{NNaO}_2^+$  454.0837; found 454.0841.

(3*S*,3*aR*,8*bS*)-2-Benzyl-3-(perfluorophenyl)-2,3,3*a*,8*b*-tetrahydro-4*H*-indeno[2,1-*d*]isoxazol-4-one (**7m**)

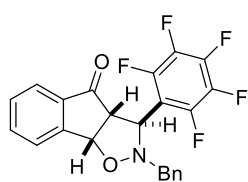

Yield: 37%; white solid; m.p. 131–133 °C;  $R_f$  = 0.58 (*n*-hexane/EtOAc 3:1 *v/v*);  $^1\text{H}$  NMR (500 MHz, DMSO- $d_6$ , 60 °C):  $\delta$  = 7.81 (t,  $J$  = 7.3 Hz, 1H), 7.78 – 7.74 (m, 2H), 7.66 (t,  $J$  = 7.4 Hz, 1H), 7.22 – 7.12 (m, 5H), 5.83 (d,  $J$  = 6.1 Hz, 1H), 4.36 (d,  $J$  = 5.5 Hz, 1H), 4.08 (t,  $J$  = 5.9 Hz, 1H), 3.90 (d,  $J$  = 13.9 Hz, 1H), 3.79 (d,  $J$  = 13.8 Hz, 1H) ppm;  $^{13}\text{C}$  NMR (125 MHz, DMSO- $d_6$ , 60 °C):  $\delta$  = 202.9, 150.0, 136.6, 136.3, 136.1, 130.8, 128.5, 128.0, 127.7, 127.3, 123.8, 78.9, 62.2, 61.2, 59.6 ppm;  $^{19}\text{F}$  NMR (470 MHz, CDCl<sub>3</sub>):  $\delta$  = –139.58 (d,  $J$  = 16.1 Hz, 2F), –153.31 (t,  $J$  = 20.8 Hz, 1F), –161.79 (td,  $J$  = 22.2, 8.0 Hz, 2F) ppm; FT-IR (neat):  $\nu$  = 3087, 3033, 2882, 1718, 1652, 1605, 1524, 1503, 1372, 1274, 1230, 1057, 1007, 969, 954, 756, 696, 670  $\text{cm}^{-1}$ ; HRMS (ESI),  $m/z$ :  $[\text{M} + \text{Na}]^+$  calcd for  $\text{C}_{23}\text{H}_{14}\text{F}_5\text{NNaO}_2^+$  454.0837; found 454.0832.

(3*S*,3*aR*,8*bS*)-2-Benzyl-3-heptyl-2,3,3*a*,8*b*-tetrahydro-4*H*-indeno[2,1-*d*]isoxazol-4-one (**6n**)

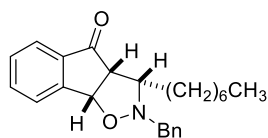

Yield: 21%; white solid; m.p. 59–60 °C;  $R_f$  = 0.63 (*n*-hexane/EtOAc 3:1 *v/v*);  $^1\text{H}$  NMR (500 MHz, DMSO- $d_6$ ):  $\delta$  = 7.74 (t,  $J$  = 7.8 Hz, 1H), 7.63 (d,  $J$  = 7.6 Hz, 2H), 7.54 (t,  $J$  = 7.5 Hz, 1H), 7.26 – 7.16 (m, 5H), 5.67 (d,  $J$  = 6.6 Hz, 1H), 4.07 (d,  $J$  = 14.4 Hz, 1H), 3.82 – 3.74 (m, 2H), 3.03 (q,  $J$  = 7.3 Hz, 1H), 1.62 – 1.52 (m, 1H), 1.40 – 1.14 (m, 10H), 0.85 (t,  $J$  = 6.9 Hz, 3H) ppm;  $^{13}\text{C}$  NMR (125 MHz, DMSO- $d_6$ ):  $\delta$  = 203.3, 152.5, 138.1, 138.0, 135.9, 130.1, 128.9, 128.4, 127.2, 127.1, 122.4, 78.2, 68.8, 59.1, 57.3, 31.7, 29.4, 29.1, 28.2, 26.6, 22.6, 14.4 ppm; FT-IR (neat):  $\nu$  = 3030, 2925, 2855, 1702, 1603, 1466, 1270, 955, 769, 753, 701  $\text{cm}^{-1}$ ; HRMS (ESI),  $m/z$ :  $[\text{M} + \text{Na}]^+$  calcd for  $\text{C}_{24}\text{H}_{29}\text{NNaO}_2^+$  386.2091; found 386.2090.

(3*R*,3*aR*,8*bS*)-2-Benzyl-3-heptyl-2,3,3*a*,8*b*-tetrahydro-4*H*-indeno[2,1-*d*]isoxazol-4-one (**7n**)

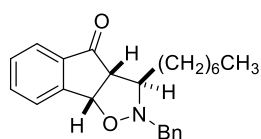

Yield: 55%; white solid; m.p. 64–65 °C;  $R_f$  = 0.57 (*n*-hexane/EtOAc 3:1 *v/v*);  $^1\text{H}$  NMR (500 MHz, DMSO- $d_6$ , 60 °C):  $\delta$  = 7.74 (t,  $J$  = 7.3 Hz, 1H), 7.70 – 7.65 (m, 2H), 7.59 (t,  $J$  = 7.4 Hz, 1H), 7.28 – 7.18 (m, 3H), 7.15 (d,  $J$  = 7.2 Hz, 2H), 5.60 (d,  $J$  = 6.4 Hz, 1H), 3.82 (d,  $J$  = 14.1 Hz, 1H), 3.65 (d,  $J$  = 14.0 Hz, 1H), 3.53 (dd,  $J$  = 6.5, 4.8 Hz, 1H), 3.09 (q,  $J$  = 5.9 Hz, 1H), 1.73 – 1.64 (m, 1H), 1.62 – 1.54 (m, 1H), 1.54 – 1.40 (m, 2H), 1.33 – 1.24 (m, 7H), 0.88 (t,  $J$  = 6.7 Hz, 3H) ppm;  $^{13}\text{C}$  NMR (125 MHz, DMSO- $d_6$ , 60 °C):  $\delta$  = 204.1, 151.6, 138.0, 136.4, 135.7, 130.3, 128.7, 128.1, 127.5, 127.0, 123.5, 79.0, 68.4, 61.3, 60.0, 32.0, 31.4, 29.1, 28.8, 25.7, 22.2, 14.0 ppm; FT-IR (neat):  $\nu$  = 3034, 2925, 2857, 1708, 1604, 1466, 1352, 1284, 1232, 771, 760, 703  $\text{cm}^{-1}$ ; HRMS (ESI),  $m/z$ :  $[\text{M} + \text{Na}]^+$  calcd for  $\text{C}_{24}\text{H}_{29}\text{NNaO}_2^+$  386.2091; found 386.2085.

#### 4. Data for compounds **9** and **10**

##### (3*S*,3*aR*,9*bR*)-2-Benzyl-3-phenyl-2,3,3*a*,9*b*-tetrahydroisoxazolo[4,5-*c*]isoquinolin-5(4*H*)-one (**9a**)

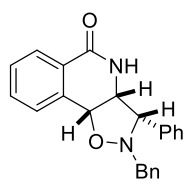

Reaction time: 48 h; yield: 78%; white solid; m.p. 169–170 °C;  $R_f$  = 0.14 (*n*-hexane/EtOAc 1:1 v/v);  $^1\text{H}$  NMR (500 MHz, DMSO- $d_6$ ):  $\delta$  = 7.83 (d,  $J$  = 7.6 Hz, 1H), 7.59 (td,  $J$  = 7.5, 1.4 Hz, 1H), 7.45 (t,  $J$  = 7.8 Hz, 1H), 7.41 (d,  $J$  = 7.7 Hz, 1H), 7.28 – 7.18 (m, 8H), 7.15 – 7.12 (m, 3H), 5.59 (d,  $J$  = 7.6 Hz, 1H), 4.76 (td,  $J$  = 7.7, 3.7 Hz, 1H), 4.28 (d,  $J$  = 7.7 Hz, 1H), 3.94 (d,  $J$  = 14.9 Hz, 1H), 3.89 (d,  $J$  = 15.0 Hz, 1H) ppm;  $^{13}\text{C}$  NMR (125 MHz, DMSO- $d_6$ ):  $\delta$  = 162.6, 138.1, 137.9, 136.3, 132.5, 129.2, 128.7, 128.5, 128.5, 128.34, 128.25, 128.1, 127.8, 127.2, 126.9, 74.6, 71.9, 60.2, 59.6 ppm; FT-IR (neat):  $\nu$  = 3206, 3074, 2855, 1652, 1582, 1412, 1342, 997, 745, 697  $\text{cm}^{-1}$ ; HRMS (ESI),  $m/z$ :  $[\text{M} + \text{Na}]^+$  calcd for  $\text{C}_{23}\text{H}_{20}\text{N}_2\text{NaO}_2^+$  379.1417; found 379.1422.

##### (4*aR*,5*S*,7*aR*)-6-Benzyl-5-phenyl-4*a*,5,6,7*a*-tetrahydroisoxazolo[4,5-*c*]tetrazolo[5,1-*a*]isoquinoline (**10a**)

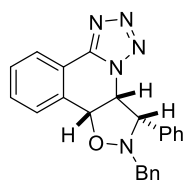

Reaction time: 48 h; yield: 14%; white solid; m.p. 148–150 °C;  $R_f$  = 0.36 (*n*-hexane/EtOAc 2:1 v/v);  $^1\text{H}$  NMR (500 MHz,  $\text{CDCl}_3$ ):  $\delta$  = 8.18 (d,  $J$  = 7.2 Hz, 1H), 7.63 – 7.54 (m, 3H), 7.29 – 7.24 (m, 3H), 7.20 – 7.10 (m, 5H), 6.94 (d,  $J$  = 6.9 Hz, 2H), 5.91 – 5.85 (m, 2H), 4.44 (d,  $J$  = 7.8 Hz, 1H), 4.07 (d,  $J$  = 14.9 Hz, 1H), 3.84 (d,  $J$  = 14.9 Hz, 1H) ppm;  $^{13}\text{C}$  NMR (125 MHz,  $\text{CDCl}_3$ ):  $\delta$  = 149.9, 136.3, 132.3, 129.5, 129.1, 128.7, 128.20, 128.19, 128.1, 128.0, 127.3, 124.9, 119.7, 74.5, 74.3, 63.3, 59.1 ppm; FT-IR (neat):  $\nu$  = 3022, 2859, 1556, 1490, 1447, 983, 788, 738, 702, 694  $\text{cm}^{-1}$ ; HRMS (ESI),  $m/z$ :  $[\text{M} + \text{Na}]^+$  calcd for  $\text{C}_{23}\text{H}_{19}\text{N}_5\text{NaO}^+$  404.1482; found 404.1476.

##### (3*S*,3*aR*,9*bR*)-2-Benzyl-3-(*p*-tolyl)-2,3,3*a*,9*b*-tetrahydroisoxazolo[4,5-*c*]isoquinolin-5(4*H*)-one (**9b**)

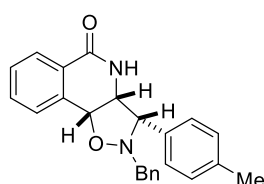

Reaction time: 48 h; yield: 59%; white solid; m.p. 157.5–158.5 °C;  $R_f$  = 0.41 (*n*-hexane/EtOAc 1:1 v/v);  $^1\text{H}$  NMR (500 MHz, DMSO- $d_6$ ):  $\delta$  = 7.83 (d,  $J$  = 7.3 Hz, 1H), 7.59 (td,  $J$  = 7.5, 1.4 Hz, 1H), 7.46 (t,  $J$  = 7.3 Hz, 1H), 7.39 (d,  $J$  = 7.7 Hz, 1H), 7.27 – 7.15 (m, 6H), 7.07 (d,  $J$  = 7.9 Hz, 2H), 7.00 (d,  $J$  = 8.0 Hz, 2H), 5.59 (d,  $J$  = 7.8 Hz, 1H), 4.70 (td,  $J$  = 7.8, 3.8 Hz, 1H), 4.20 (d,  $J$  = 7.8 Hz, 1H), 3.87 (s, 2H), 2.25 (s, 3H) ppm;  $^{13}\text{C}$  NMR (125 MHz, DMSO- $d_6$ ):  $\delta$  = 162.3, 138.0, 137.6, 137.0, 132.9, 132.2, 128.99, 128.95, 128.5, 128.4, 128.2, 128.1, 127.7, 127.0, 126.7, 74.4, 71.8, 60.0, 60.0, 20.9 ppm; FT-IR (neat):  $\nu$  = 3206, 3088, 2895, 1652, 1583, 1409, 1354, 755, 734  $\text{cm}^{-1}$ ; HRMS (ESI),  $m/z$ :  $[\text{M} + \text{Na}]^+$  calcd for  $\text{C}_{24}\text{H}_{22}\text{N}_2\text{NaO}_2^+$  393.1573; found 393.1573.

(4*aR*,5*S*,7*aR*)-6-Benzyl-5-(*p*-tolyl)-4*a*,5,6,7*a*-tetrahydroisoxazolo[4,5-*c*]tetrazolo[5,1-*a*]isoquinoline  
(**10b**)

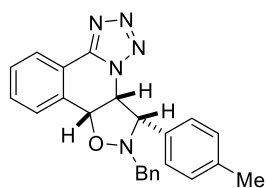

Reaction time: 48 h; yield: 19%; white solid; m.p. 151–152 °C;  $R_f$  = 0.57 (*n*-hexane/EtOAc 1:1 v/v);  $^1\text{H}$  NMR (500 MHz,  $\text{CDCl}_3$ ):  $\delta$  = 8.19 (d,  $J$  = 7.2 Hz, 1H), 7.62 – 7.54 (m, 3H), 7.29 – 7.23 (m, 3H), 7.15 – 7.11 (m, 2H), 6.93 (d,  $J$  = 7.8 Hz, 2H), 6.82 (d,  $J$  = 7.7 Hz, 2H), 5.89 – 5.83 (m, 2H), 4.40 (d,  $J$  = 6.2 Hz, 1H), 4.05 (d,  $J$  = 14.9 Hz, 1H), 3.81 (d,  $J$  = 15.0 Hz, 1H), 2.22 (s, 3H) ppm;  $^{13}\text{C}$  NMR (125 MHz,  $\text{CDCl}_3$ ):  $\delta$  = 149.9, 138.9, 136.4, 132.3, 129.46, 129.45, 129.2, 129.0, 128.23, 128.21, 128.1, 128.03, 127.99, 127.2, 124.9, 119.8, 74.5, 74.2, 63.3, 59.0, 21.1 ppm; FT-IR (neat):  $\nu$  = 3067, 3028, 2877, 1557, 1513, 1494, 1450, 1330, 1111, 1051, 818, 731, 723, 695  $\text{cm}^{-1}$ ; HRMS (ESI),  $m/z$ :  $[\text{M} + \text{Na}]^+$  calcd for  $\text{C}_{24}\text{H}_{21}\text{N}_5\text{NaO}^+$  418.1638; found 418.1640.

3*S*,3*aR*,9*bR*)-2-Benzyl-3-(4-methoxyphenyl)-2,3,3*a*,9*b*-tetrahydroisoxazolo[4,5-*c*]isoquinolin-5(4*H*)-  
one (**9c**)

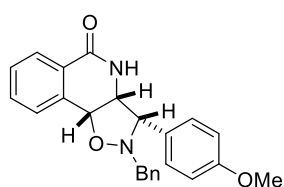

Reaction time: 48 h; yield: 62%; white solid; m.p. 170–171 °C;  $R_f$  = 0.14 (*n*-hexane/EtOAc 1:1 v/v);  $^1\text{H}$  NMR (500 MHz,  $\text{DMSO}-d_6$ ):  $\delta$  = 7.86 (d,  $J$  = 6.9 Hz, 1H), 7.59 (td,  $J$  = 7.5, 1.4 Hz, 1H), 7.46 (t,  $J$  = 7.3 Hz, 1H), 7.40 (d,  $J$  = 7.6 Hz, 1H), 7.27 – 7.16 (m, 6H), 7.04 (d,  $J$  = 8.7 Hz, 2H), 6.83 (d,  $J$  = 8.7 Hz, 2H), 5.58 (d,  $J$  = 7.7 Hz, 1H), 4.68 (td,  $J$  = 7.7, 3.7 Hz, 1H), 4.19 (d,  $J$  = 7.7 Hz, 1H), 3.87 (s, 2H), 3.71 (s, 3H) ppm;  $^{13}\text{C}$  NMR (125 MHz,  $\text{DMSO}-d_6$ ):  $\delta$  = 162.6, 159.3, 138.3, 138.2, 132.6, 130.5, 128.7, 128.5, 128.4, 128.3, 127.9, 127.7, 127.2, 126.9, 114.1, 74.3, 71.9, 60.0, 59.4, 55.5 ppm; FT-IR (neat):  $\nu$  = 3197, 3087, 1652, 1582, 1513, 1251, 1176, 1031, 829, 757  $\text{cm}^{-1}$ ; HRMS (ESI),  $m/z$ :  $[\text{M} + \text{Na}]^+$  calcd for  $\text{C}_{24}\text{H}_{22}\text{N}_2\text{NaO}_3^+$  409.1523; found 409.1526.

(3*S*,3*aR*,9*bR*)-2-Benzyl-3-(4-hydroxyphenyl)-2,3,3*a*,9*b*-tetrahydroisoxazolo[4,5-*c*]isoquinolin-5(4*H*)-  
one (**9d**)

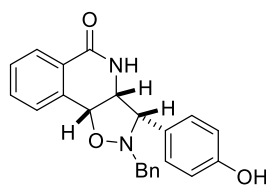

Reaction time: 48 h; yield: 54%; white solid; m.p. 163–164 °C;  $R_f$  = 0.12 (*n*-hexane/EtOAc 1:1 v/v);  $^1\text{H}$  NMR (500 MHz,  $\text{DMSO}-d_6$ ):  $\delta$  = 9.38 (s, 1H), 7.86 (d,  $J$  = 7.6 Hz, 1H), 7.58 (t,  $J$  = 7.5 Hz, 1H), 7.46 (t,  $J$  = 7.5 Hz, 1H), 7.39 (d,  $J$  = 7.6 Hz, 1H), 7.26 – 7.15 (m, 6H), 6.93 (d,  $J$  = 8.4 Hz, 2H), 6.66 (d,  $J$  = 8.5 Hz, 2H), 5.56 (d,  $J$  = 7.7 Hz, 1H), 4.64 (td,  $J$  = 7.7, 3.6 Hz, 1H), 4.13 (d,  $J$  = 7.6 Hz, 1H), 3.86 (d,  $J$  = 15.2 Hz, 1H), 3.86 (d,  $J$  = 15.2 Hz, 1H) ppm;  $^{13}\text{C}$  NMR (125 MHz,  $\text{DMSO}-d_6$ ):  $\delta$  = 162.6, 157.4, 138.4, 138.2, 132.6, 130.5, 128.7, 128.5, 128.4, 127.8, 127.2, 126.9, 126.1, 115.5, 74.5, 71.9, 60.0, 59.4 ppm; FT-IR (neat):  $\nu$  = 3332, 3140, 1645, 1577, 1516, 1454, 1231, 738  $\text{cm}^{-1}$ ; HRMS (ESI),  $m/z$ :  $[\text{M} + \text{Na}]^+$  calcd for  $\text{C}_{23}\text{H}_{20}\text{N}_2\text{NaO}_3^+$  395.1366; found 395.1370.

(3*S*,3*aR*,9*bR*)-2-Benzyl-3-(4-morpholinophenyl)-2,3,3*a*,9*b*-tetrahydroisoxazolo[4,5-*c*]isoquinolin-5(4*H*)-one (**9e**)

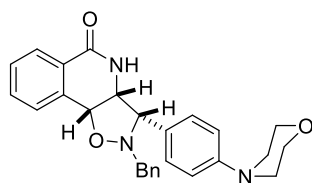

Reaction time: 72 h; yield: 81%; white solid; m.p. 167–168 °C;  $R_f$  = 0.25 (*n*-hexane/THF 1:1 *v/v*);  $^1\text{H}$  NMR (500 MHz, DMSO- $d_6$ ):  $\delta$  = 7.87 (d,  $J$  = 7.0 Hz, 1H), 7.59 (td,  $J$  = 7.5, 1.4 Hz, 1H), 7.47 (t,  $J$  = 7.3 Hz, 1H), 7.39 (d,  $J$  = 7.6 Hz, 1H), 7.26 – 7.15 (m, 6H), 6.99 (d,  $J$  = 8.7 Hz, 2H), 6.84 (d,  $J$  = 8.8 Hz, 2H), 5.56 (d,  $J$  = 7.7 Hz, 1H), 4.65 (td,  $J$  = 7.7, 3.7 Hz, 1H), 4.13 (d,  $J$  = 7.6 Hz, 1H), 3.85 (d,  $J$  = 15.3 Hz, 1H), 3.84 (d,  $J$  = 15.1 Hz, 1H), 3.70 (t,  $J$  = 4.8 Hz, 4H), 3.12 – 3.01 (m, 4H) ppm;  $^{13}\text{C}$  NMR (125 MHz, DMSO- $d_6$ ):  $\delta$  = 162.6, 151.0, 138.4, 138.2, 132.5, 130.1, 128.67, 128.4, 128.3, 127.8, 127.2, 126.9, 126.1, 115.1, 74.6, 71.9, 66.6, 59.9, 59.4, 48.6 ppm; FT-IR (neat):  $\nu$  = 3216, 2963, 2853, 1654, 1583, 1518, 1350, 1239, 1122, 926, 762, 734  $\text{cm}^{-1}$ ; HRMS (ESI),  $m/z$ :  $[\text{M} + \text{Na}]^+$  calcd for  $\text{C}_{27}\text{H}_{27}\text{N}_3\text{NaO}_3^+$  464.1945; found 464.1955.

(3*S*,3*aR*,9*bR*)-2-Benzyl-3-(4-(trifluoromethyl)phenyl)-2,3,3*a*,9*b*-tetrahydroisoxazolo[4,5-*c*]isoquinolin-5(4*H*)-one (**9f**)

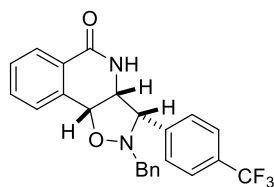

Reaction time: 72 h; yield: 70%; white solid; m.p. 165–166 °C;  $R_f$  = 0.39 (*n*-hexane/EtOAc 1:1 *v/v*);  $^1\text{H}$  NMR (500 MHz, DMSO- $d_6$ ):  $\delta$  = 7.81 (d,  $J$  = 7.7 Hz, 1H), 7.62 – 7.57 (m, 3H), 7.54 (d,  $J$  = 3.8 Hz, 1H), 7.48 – 7.40 (m, 2H), 7.32 (d,  $J$  = 8.1 Hz, 2H), 7.27 – 7.19 (m, 5H), 5.63 (d,  $J$  = 7.8 Hz, 1H), 4.84 (td,  $J$  = 7.9, 3.8 Hz, 1H), 4.41 (d,  $J$  = 7.9 Hz, 1H), 3.98 (d,  $J$  = 14.8 Hz, 1H), 3.92 (d,  $J$  = 14.8 Hz, 1H) ppm;  $^{13}\text{C}$  NMR (125 MHz, DMSO- $d_6$ ):  $\delta$  = 162.6, 141.5, 137.9, 137.9, 132.6, 130.0, 128.7, 128.6, 128.5 (q,  $J$  = 31.2 Hz), 128.4, 128.1, 127.7, 127.3, 126.9, 125.3 (q,  $J$  = 3.8 Hz), 124.7 (q,  $J$  = 272.0 Hz), 73.9, 71.8, 60.3, 59.6 ppm;  $^{19}\text{F}$  NMR (470 MHz,  $\text{CDCl}_3$ ):  $\delta$  = –62.73 (s, 3F) ppm; FT-IR (neat):  $\nu$  = 3203, 3086, 2899, 1647, 1584, 1410, 1326, 1165, 1132, 1369, 758, 735  $\text{cm}^{-1}$ ; HRMS (ESI),  $m/z$ :  $[\text{M} + \text{Na}]^+$  calcd for  $\text{C}_{24}\text{H}_{19}\text{F}_3\text{N}_2\text{NaO}_2^+$  447.1290; found 447.1286.

(3*S*,3*aR*,9*bR*)-2-Benzyl-3-(2-(trifluoromethyl)phenyl)-2,3,3*a*,9*b*-tetrahydroisoxazolo[4,5-*c*]isoquinolin-5(4*H*)-one (**9g**)

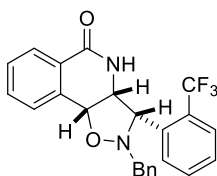

Reaction time: 48 h; yield: 65%; white solid; m.p. 175–176 °C;  $R_f$  = 0.26 (*n*-hexane/EtOAc 2:1 *v/v*);  $^1\text{H}$  NMR (500 MHz, DMSO- $d_6$ ):  $\delta$  = 7.87 (d,  $J$  = 7.0 Hz, 1H), 7.74 (d,  $J$  = 7.1 Hz, 1H), 7.62 (td,  $J$  = 7.5, 1.4 Hz, 1H), 7.55 (d,  $J$  = 3.8 Hz, 1H), 7.52 – 7.44 (m, 3H), 7.41 (d,  $J$  = 7.6 Hz, 1H), 7.25 – 7.16 (m, 4H), 7.12 (d,  $J$  = 6.7 Hz, 2H), 5.66 (d,  $J$  = 7.8 Hz, 1H), 4.75 (td,  $J$  = 7.8, 4.0 Hz, 1H), 4.38 (d,  $J$  = 8.5 Hz, 1H), 3.88 (d,  $J$  = 14.9 Hz, 1H), 3.82 (d,  $J$  = 14.9 Hz, 1H) ppm;  $^{13}\text{C}$  NMR (125 MHz, DMSO- $d_6$ ):  $\delta$  = 162.5, 137.8, 137.3, 134.5, 132.4, 132.2, 130.7, 129.0 (q,  $J$  = 34.2 Hz), 128.6, 128.4, 128.3, 128.1, 128.0, 127.6, 127.1, 126.7, 125.9 (q,  $J$  = 5.7 Hz), 124.5 (q,  $J$  = 274.0 Hz), 72.0, 71.3, 60.0, 59.9 ppm;  $^{19}\text{F}$  NMR (470 MHz,  $\text{CDCl}_3$ ):  $\delta$  = –58.99 (s, 3F) ppm; FT-IR (neat):  $\nu$  = 3196, 3064, 2922, 1682, 1311, 1164,

1114, 1103, 1033, 778, 737, 696  $\text{cm}^{-1}$ ; HRMS (ESI),  $m/z$ :  $[\text{M} + \text{Na}]^+$  calcd for  $\text{C}_{24}\text{H}_{19}\text{F}_3\text{N}_2\text{NaO}_2^+$  447.1290; found 447.1306.

(4a*R*,5*S*,7a*R*)-6-Benzyl-5-(2-(trifluoromethyl)phenyl)-4a,5,6,7a-tetrahydroisoxazolo[4,5-*c*]tetrazolo[5,1-*a*]isoquinoline (**10g**)

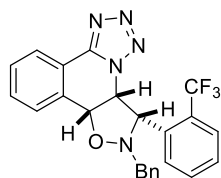

Reaction time: 48 h; yield: 12%; white solid; m.p. 161–162 °C;  $R_f$  = 0.51 (*n*-hexane/EtOAc 2:1 *v/v*);  $^1\text{H}$  NMR (500 MHz,  $\text{CDCl}_3$ ):  $\delta$  = 8.20 (d,  $J$  = 7.8 Hz, 1H), 7.66 (d,  $J$  = 7.9 Hz, 1H), 7.63 – 7.55 (m, 3H), 7.29 (t,  $J$  = 7.7 Hz, 1H), 7.24 – 7.20 (m, 3H), 7.12 (t,  $J$  = 7.7 Hz, 1H), 7.10 – 7.06 (m, 2H), 6.87 (d,  $J$  = 7.8 Hz, 1H), 5.95 (t,  $J$  = 8.5 Hz, 1H), 5.90 (d,  $J$  = 8.8 Hz, 1H), 4.81 (d,  $J$  = 7.8 Hz, 1H), 3.97 (d,  $J$  = 15.0 Hz, 1H), 3.86 (d,  $J$  = 15.0 Hz, 1H) ppm;  $^{13}\text{C}$  NMR (125 MHz,  $\text{CDCl}_3$ ):  $\delta$  = 149.9, 136.2, 135.1, 132.4, 132.1, 131.1 (q,  $J$  = 1.6 Hz), 129.6, 128.9, 128.2, 128.04, 128.02, 127.9, 127.3, 126.2 (q,  $J$  = 5.5 Hz), 124.9, 124.1 (q,  $J$  = 273.7 Hz), 119.5, 74.7, 70.8, 63.6, 59.1 ppm;  $^{19}\text{F}$  NMR (470 MHz,  $\text{CDCl}_3$ ):  $\delta$  = –58.25 (s, 3F) ppm; FT-IR (neat):  $\nu$  = 3072, 3040, 2945, 1455, 1309, 1277, 1176, 1114, 1033, 772, 741, 697  $\text{cm}^{-1}$ ; HRMS (ESI),  $m/z$ :  $[\text{M} + \text{Na}]^+$  calcd for  $\text{C}_{24}\text{H}_{18}\text{F}_3\text{N}_5\text{NaO}^+$  472.1356; found 472.1349.

(3*S*,3a*R*,9b*R*)-2-Benzyl-3-(2-bromophenyl)-2,3,3a,9b-tetrahydroisoxazolo[4,5-*c*]isoquinolin-5(4*H*)-one (**9h**)

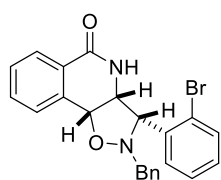

Reaction time: 48 h; yield: 65%; white solid; m.p. 159–161 °C;  $R_f$  = 0.40 (*n*-hexane/EtOAc 1:1 *v/v*);  $^1\text{H}$  NMR (500 MHz,  $\text{DMSO}-d_6$ ):  $\delta$  = 7.81 (d,  $J$  = 7.5 Hz, 1H), 7.64 – 7.59 (m, 2H), 7.47 (t,  $J$  = 7.5 Hz, 1H), 7.43 (d,  $J$  = 7.7 Hz, 1H), 7.34 (d,  $J$  = 3.8 Hz, 1H), 7.27 – 7.16 (m, 6H), 7.05 (dd,  $J$  = 6.0, 3.7 Hz, 1H), 5.65 (d,  $J$  = 7.3 Hz, 1H), 4.83 (td,  $J$  = 7.5, 3.9 Hz, 1H), 4.55 (d,  $J$  = 7.6 Hz, 1H), 3.96 (d,  $J$  = 14.8 Hz, 1H), 3.91 (d,  $J$  = 14.8 Hz, 1H) ppm;  $^{13}\text{C}$  NMR (125 MHz,  $\text{DMSO}-d_6$ ):  $\delta$  = 162.7, 137.8, 137.7, 135.5, 132.9, 132.7, 130.7, 130.0, 128.9, 128.7, 128.4, 128.3, 127.88, 127.85, 127.4, 126.9, 124.6, 73.9, 72.2, 60.4, 58.5 ppm; FT-IR (neat):  $\nu$  = 3190, 3063, 2949, 1675, 1583, 1416, 763, 736  $\text{cm}^{-1}$ ; HRMS (ESI),  $m/z$ :  $[\text{M} + \text{Na}]^+$  calcd for  $\text{C}_{23}\text{H}_{19}\text{BrN}_2\text{NaO}_2^+$  457.0522; found 457.0531,

(4a*R*,5*S*,7a*R*)-6-Benzyl-5-(2-bromophenyl)-4a,5,6,7a-tetrahydroisoxazolo[4,5-*c*]tetrazolo[5,1-*a*]isoquinoline (**10h**)

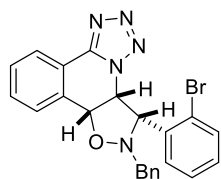

Reaction time: 48 h; yield: 17%; white solid; m.p. 158–159 °C;  $R_f$  = 0.74 (*n*-hexane/EtOAc 1:1 *v/v*);  $^1\text{H}$  NMR (500 MHz,  $\text{CDCl}_3$ ):  $\delta$  = 8.16 (d,  $J$  = 7.5 Hz, 1H), 7.63 – 7.53 (m, 4H), 7.27 – 7.23 (m, 3H), 7.14 – 7.10 (m, 2H), 7.05 (td,  $J$  = 7.7, 1.8 Hz, 1H), 6.91 (td,  $J$  = 7.6, 1.2 Hz, 1H), 6.70 (dd,  $J$  = 7.8, 1.7 Hz, 1H), 6.02 (t,  $J$  = 8.4 Hz, 1H), 5.89 (d,  $J$  = 8.7 Hz, 1H), 4.92 (d,  $J$  = 8.2 Hz, 1H), 4.06 (d,  $J$  = 15.0 Hz, 1H), 3.87 (d,  $J$  = 15.0 Hz, 1H) ppm;  $^{13}\text{C}$  NMR (125 MHz,  $\text{CDCl}_3$ ):  $\delta$  = 149.8, 135.9, 135.0, 132.9, 132.3, 132.1, 130.2, 129.6, 128.2, 128.1, 127.6, 127.3, 125.5, 124.9, 119.7, 74.5, 73.2, 62.0, 59.0 ppm; FT-IR

(neat):  $\nu = 3067, 2980, 2879, 1481, 1449, 1435, 1376, 1018, 977, 740, 697, 605 \text{ cm}^{-1}$ ; HRMS (ESI),  $m/z$ :  $[M + Na]^+$  calcd for  $C_{23}H_{18}BrN_5NaO^+$  482.0587; found 482.0577.

(3*S*,3*aR*,9*bR*)-2-Benzyl-3-(2-morpholinophenyl)-2,3,3*a*,9*b*-tetrahydroisoxazolo[4,5-*c*]isoquinolin-5(4*H*)-one (**9i**)

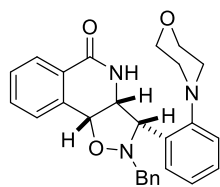

Reaction time: 72 h; yield: 51%; off-white solid; m.p. 162.5–163.5 °C;  $R_f = 0.20$  (*n*-hexane/THF 1:1 *v/v*);  $^1\text{H}$  NMR (500 MHz, DMSO- $d_6$ ):  $\delta = 7.88$  (d,  $J = 6.9$  Hz, 1H), 7.61 (td,  $J = 7.5, 1.4$  Hz, 1H), 7.49 (t,  $J = 7.5$  Hz, 1H), 7.44 (d,  $J = 7.6$  Hz, 1H), 7.27 – 7.13 (m, 7H), 7.10 (d,  $J = 3.4$  Hz, 1H), 7.04 (dd,  $J = 7.8, 1.7$  Hz, 1H), 6.98 (td,  $J = 7.9, 7.4, 1.6$  Hz, 1H), 5.63 (d,  $J = 7.3$  Hz, 1H), 4.83 (td,  $J = 7.3, 3.5$  Hz, 1H), 4.75 (d,  $J = 7.3$  Hz, 1H), 3.84 (s, 2H), 3.74 (dtd,  $J = 17.1, 10.9, 2.9$  Hz, 4H), 2.89 (ddd,  $J = 11.7, 6.1, 3.1$  Hz, 2H), 2.77 (ddd,  $J = 8.5, 6.0, 3.2$  Hz, 2H) ppm;  $^{13}\text{C}$  NMR (125 MHz, DMSO- $d_6$ ):  $\delta = 162.8, 152.6, 137.92, 137.85, 132.6, 131.7, 130.2, 128.88, 128.87, 128.8, 128.4, 128.3, 128.2, 127.3, 126.9, 124.5, 121.4, 72.2, 69.2, 67.3, 60.0, 58.9, 53.8$  ppm; FT-IR (neat):  $\nu = 3194, 3062, 2949, 2846, 1675, 1425, 1113, 1031, 741 \text{ cm}^{-1}$ ; HRMS (ESI),  $m/z$ :  $[M + H]^+$  calcd for  $C_{27}H_{28}N_3O_3^+$  442.2125; found 442.2134.

(3*S*,3*aR*,9*bR*)-2-Benzyl-3-(pyridin-3-yl)-2,3,3*a*,9*b*-tetrahydroisoxazolo[4,5-*c*]isoquinolin-5(4*H*)-one (**9j**)

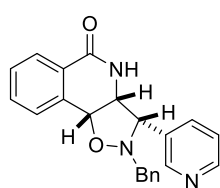

Reaction time: 48 h; yield: 53%; off-white solid; m.p. 164–165 °C;  $R_f = 0.17$  (DCM:acetone 1:1 *v/v*);  $^1\text{H}$  NMR (500 MHz, DMSO- $d_6$ ):  $\delta = 8.40$  (dd,  $J = 4.8, 1.7$  Hz, 1H), 8.29 (d,  $J = 2.1$  Hz, 1H), 7.80 (dd,  $J = 7.7, 1.4$  Hz, 1H), 7.64 (d,  $J = 3.9$  Hz, 1H), 7.60 (td,  $J = 7.5, 1.4$  Hz, 1H), 7.47 – 7.40 (m, 2H), 7.34 (dt,  $J = 7.9, 2.0$  Hz, 1H), 7.27 – 7.18 (m, 6H), 5.64 (d,  $J = 8.0$  Hz, 1H), 4.82 (td,  $J = 8.0, 3.9$  Hz, 1H), 4.35 (d,  $J = 8.0$  Hz, 1H), 3.99 (d,  $J = 14.7$  Hz, 1H), 3.92 (d,  $J = 14.7$  Hz, 1H) ppm;  $^{13}\text{C}$  NMR (125 MHz, DMSO- $d_6$ ):  $\delta = 162.6, 150.6, 149.1, 138.0, 137.9, 136.7, 132.7, 132.4, 128.7, 128.6, 128.4, 128.0, 127.6, 127.4, 126.9, 123.5, 72.2, 71.7, 60.3, 59.3$  ppm; FT-IR (neat):  $\nu = 3193, 3051, 2958, 1667, 1496, 1417, 1037, 735, 715 \text{ cm}^{-1}$ ; HRMS (ESI),  $m/z$ :  $[M + Na]^+$  calcd for  $C_{22}H_{19}N_3NaO_2^+$  380.1369; found 380.1360.

(3*S*,3*aR*,9*bR*)-2-Benzyl-3-mesityl-2,3,3*a*,9*b*-tetrahydroisoxazolo[4,5-*c*]isoquinolin-5(4*H*)-one (**9k**)

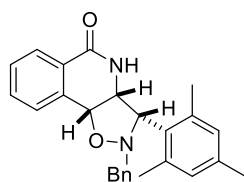

Reaction time: 48 h; yield: 90%; white solid; m.p. 175–176 °C;  $R_f = 0.34$  (*n*-hexane/EtOAc 2:1 *v/v*);  $^1\text{H}$  NMR (500 MHz, DMSO- $d_6$ , 60 °C):  $\delta = 8.25$  (br s, 1H), 8.04 (d,  $J = 7.7$  Hz, 1H), 7.60 (td,  $J = 7.4, 1.5$  Hz, 1H), 7.55 – 7.50 (m, 2H), 7.27 – 7.17 (m, 5H), 6.88 (s, 2H), 5.43 (d,  $J = 7.5$  Hz, 1H), 4.76 (td,  $J = 7.2, 2.5$  Hz, 1H), 4.29 (d,  $J = 6.9$  Hz, 1H), 3.72 (d,  $J = 14.7$  Hz, 1H), 3.66 (d,  $J = 14.8$  Hz, 1H), 2.50 (s, 6H), 2.22 (s, 3H) ppm;  $^{13}\text{C}$  NMR (125 MHz, DMSO- $d_6$ , 60 °C):  $\delta = 161.5, 138.3, 138.1, 137.0, 134.6, 132.4, 130.3, 129.9, 129.3, 129.1, 128.4, 128.2, 127.6, 127.3, 127.0, 76.9, 71.8, 60.7,$

60.1, 21.2, 20.6 ppm; FT-IR (neat):  $\nu$  = 3179, 3044, 2915, 1679, 1586, 1422, 844, 766, 701  $\text{cm}^{-1}$ ; HRMS (ESI),  $m/z$ :  $[M + K]^+$  calcd for  $\text{C}_{26}\text{H}_{26}\text{KN}_2\text{O}_2^+$  437.1626; found 437.1635.

(3*S*,3*aR*,9*bR*)-2-Benzyl-3-(2,6-dichlorophenyl)-2,3,3*a*,9*b*-tetrahydroisoxazolo[4,5-*c*]isoquinolin-5(4*H*)-one (**9l**)

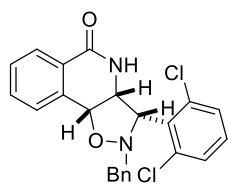

Reaction time: 72 h; yield: 72%; white solid; m.p. 179–180 °C;  $R_f$  = 0.43 (*n*-hexane/EtOAc 1:1 *v/v*);  $^1\text{H}$  NMR (500 MHz,  $\text{DMSO}-d_6$ , 60 °C):  $\delta$  = 8.48 (br s, 1H), 8.05 (d,  $J$  = 7.4 Hz, 1H), 7.61 (t,  $J$  = 7.4 Hz, 1H), 7.58 – 7.53 (m, 2H), 7.48 (d,  $J$  = 8.0 Hz, 2H), 7.35 (t,  $J$  = 8.1 Hz, 1H), 7.24 – 7.13 (m, 5H), 5.53 (d,  $J$  = 7.2 Hz, 1H), 5.06 (td,  $J$  = 6.5, 2.4 Hz, 1H), 4.71 (d,  $J$  = 6.2 Hz, 1H), 3.85 (d,  $J$  = 14.3 Hz, 1H), 3.72 (d,  $J$  = 14.3 Hz, 1H) ppm;  $^{13}\text{C}$  NMR (125 MHz,  $\text{DMSO}-d_6$ , 60 °C):  $\delta$  = 161.3, 137.4, 136.2, 134.1, 132.4, 130.9, 130.7, 130.0, 129.8, 129.5, 128.3, 128.0, 127.6, 127.4, 127.1, 77.0, 72.0, 60.9, 60.2 ppm; FT-IR (neat):  $\nu$  = 3176, 3035, 2910, 1661, 1582, 1434, 1416, 783, 762, 736  $\text{cm}^{-1}$ ; HRMS (ESI),  $m/z$ :  $[M + \text{Na}]^+$  calcd for  $\text{C}_{23}\text{H}_{18}\text{Cl}_2\text{N}_2\text{NaO}_2^+$  447.0638; found 447.0644.

(4*aR*,5*S*,7*aR*)-6-Benzyl-5-(2,6-dichlorophenyl)-4*a*,5,6,7*a*-tetrahydroisoxazolo[4,5-*c*]tetrazolo[5,1-*a*]isoquinoline (**10l**)

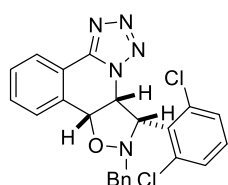

Reaction time: 72 h; yield: 13%; white solid; m.p. 188–189 °C;  $R_f$  = 0.68 (*n*-hexane/EtOAc 1:1 *v/v*);  $^1\text{H}$  NMR (500 MHz,  $\text{CDCl}_3$ ):  $\delta$  = 8.34 (dd,  $J$  = 7.2, 1.7 Hz, 1H), 7.69 (dd,  $J$  = 7.4, 1.7 Hz, 1H), 7.66 – 7.59 (m, 2H), 7.41 (d,  $J$  = 8.0 Hz, 2H), 7.31 – 7.16 (m, 6H), 6.02 (dd,  $J$  = 6.7, 5.3 Hz, 1H), 5.92 (d,  $J$  = 6.7 Hz, 1H), 5.08 (d,  $J$  = 5.3 Hz, 1H), 3.94 (d,  $J$  = 14.4 Hz, 1H), 3.85 (d,  $J$  = 14.3 Hz, 1H) ppm;  $^{13}\text{C}$  NMR (125 MHz,  $\text{CDCl}_3$ ):  $\delta$  = 148.9, 136.5, 132.2, 131.4, 130.9, 130.7, 129.5, 129.1, 128.3, 128.0, 127.3, 126.0, 120.5, 75.53, 75.46, 64.3, 60.1 ppm; FT-IR (neat):  $\nu$  = 3090, 2951, 2919, 1488, 1455, 1435, 1318, 1049, 786, 773, 749, 624  $\text{cm}^{-1}$ ; HRMS (ESI),  $m/z$ :  $[M + \text{Na}]^+$  calcd for  $\text{C}_{23}\text{H}_{17}\text{Cl}_2\text{N}_5\text{NaO}^+$  472.0702; found 472.0711.

(3*S*,3*aR*,9*bR*)-2-Benzyl-3-(perfluorophenyl)-2,3,3*a*,9*b*-tetrahydroisoxazolo[4,5-*c*]isoquinolin-5(4*H*)-one (**9m**)

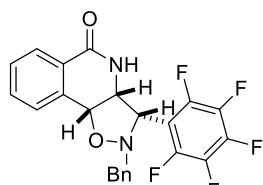

Reaction time: 48 h; yield: 65%; white solid; m.p. 192–193 °C;  $R_f$  = 0.18 (*n*-hexane/EtOAc 2:1 *v/v*);  $^1\text{H}$  NMR (500 MHz,  $\text{DMSO}-d_6$ ):  $\delta$  = 7.94 (d,  $J$  = 7.5 Hz, 1H), 7.76 (d,  $J$  = 2.7 Hz, 1H), 7.62 (td,  $J$  = 7.5, 1.4 Hz, 1H), 7.52 – 7.47 (m, 2H), 7.22 – 7.15 (m, 5H), 5.66 (d,  $J$  = 7.6 Hz, 1H), 4.85 (td,  $J$  = 7.5, 3.1 Hz, 1H), 4.59 (d,  $J$  = 7.4 Hz, 1H), 4.08 (d,  $J$  = 13.8 Hz, 1H), 4.02 (d,  $J$  = 13.8 Hz, 1H) ppm;  $^{13}\text{C}$  NMR (125 MHz,  $\text{DMSO}-d_6$ ):  $\delta$  = 162.6, 137.0, 136.3, 132.6, 129.1, 129.0, 128.7, 128.3, 128.1, 127.6, 127.0, 71.8, 68.0, 60.9, 59.3 ppm;  $^{19}\text{F}$  NMR (470 MHz,  $\text{CDCl}_3$ ):  $\delta$  = –133.97 (br s, 1F), –140.75 (br s, 1F), –156.44 (t,  $J$  = 22.2 Hz, 1F), –164.03 (d,  $J$  = 276.0 Hz, 2F) ppm; FT-IR (neat):  $\nu$  =

3182, 3052, 2928, 1657, 1522, 1499, 1415, 1348, 970, 738, 693  $\text{cm}^{-1}$ ; HRMS (ESI),  $m/z$ :  $[\text{M} + \text{Na}]^+$  calcd for  $\text{C}_{23}\text{H}_{15}\text{F}_5\text{N}_2\text{NaO}_2^+$  469.0946; found 464.0960.

**3*S*,3*aR*,9*bR*)-2-Benzyl-3-heptyl-2,3,3*a*,9*b*-tetrahydroisoxazolo[4,5-*c*]isoquinolin-5(4*H*)-one (9*n*)**

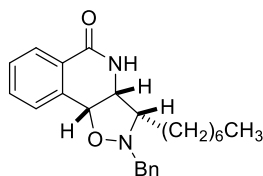

Reaction time: 48 h; yield: 69%; white solid; m.p. 138–139 °C;  $R_f$  = 0.37 (*n*-hexane/EtOAc 1:1 *v/v*);  $^1\text{H}$  NMR (500 MHz,  $\text{DMSO}-d_6$ ):  $\delta$  = 7.98 – 7.92 (m, 2H), 7.56 (td,  $J$  = 7.5, 1.4 Hz, 1H), 7.48 (t,  $J$  = 7.5 Hz, 1H), 7.38 (d,  $J$  = 7.5 Hz, 1H), 7.33 – 7.21 (m, 5H), 5.41 (d,  $J$  = 7.1 Hz, 1H), 4.63 (td,  $J$  = 6.8, 2.4 Hz, 1H), 4.04 (d,  $J$  = 13.8 Hz, 1H), 3.98 (d,  $J$  = 13.8 Hz, 1H), 3.23 (q,  $J$  = 6.8 Hz, 1H), 1.53 – 1.45 (m, 1H), 1.29 – 1.10 (m, 10H), 0.84 (t,  $J$  = 7.1 Hz, 3H) ppm;  $^{13}\text{C}$  NMR (125 MHz,  $\text{DMSO}-d_6$ ):  $\delta$  = 163.0, 138.5, 135.8, 132.6, 129.3, 129.2, 129.0, 128.5, 128.1, 127.4, 127.3, 71.1, 70.2, 61.2, 57.9, 31.7, 29.4, 29.1, 28.4, 26.7, 22.6, 14.4 ppm; FT-IR (neat):  $\nu$  = 3209, 2915, 2849, 1664, 1583, 1418, 1339, 761, 727, 694  $\text{cm}^{-1}$ ; HRMS (ESI),  $m/z$ :  $[\text{M} + \text{Na}]^+$  calcd for  $\text{C}_{24}\text{H}_{30}\text{N}_2\text{NaO}_2^+$  401.2199; found 401.2200.

**(4*aR*,5*S*,7*aR*)-6-Benzyl-5-heptyl-4*a*,5,6,7*a*-tetrahydroisoxazolo[4,5-*c*]tetrazolo[5,1-*a*]isoquinoline (10*n*)**

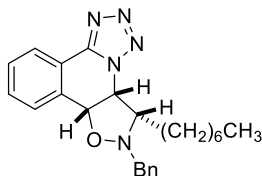

Reaction time: 48 h; yield: 11%; white solid; m.p. 119–120 °C;  $R_f$  = 0.80 (*n*-hexane/EtOAc 1:1 *v/v*);  $^1\text{H}$  NMR (500 MHz,  $\text{CDCl}_3$ ):  $\delta$  = 8.24 (dd,  $J$  = 7.5, 1.8 Hz, 1H), 7.60 – 7.52 (m, 3H), 7.38 – 7.29 (m, 5H), 5.82 – 5.76 (m, 1H), 4.15 (d,  $J$  = 13.5 Hz, 1H), 4.09 (d,  $J$  = 13.6 Hz, 1H), 3.68 (q,  $J$  = 6.9 Hz, 1H), 1.28 – 1.17 (m, 4H), 1.15 – 1.06 (m, 4H), 1.04 – 0.95 (m, 4H), 0.83 (t,  $J$  = 7.2 Hz, 3H) ppm;  $^{13}\text{C}$  NMR (125 MHz,  $\text{CDCl}_3$ ):  $\delta$  = 150.3, 136.1, 133.1, 132.4, 129.8, 128.8, 128.7, 128.4, 127.7, 125.4, 119.1, 73.8, 69.1, 61.4, 60.4, 31.6, 29.0, 29.0, 27.3, 26.2, 22.5, 14.0 ppm; FT-IR (neat):  $\nu$  = 3064, 2947, 2926, 2855, 1493, 1455, 1111, 788, 745, 710  $\text{cm}^{-1}$ ; HRMS (ESI),  $m/z$ :  $[\text{M} + \text{Na}]^+$  calcd for  $\text{C}_{24}\text{H}_{29}\text{N}_5\text{NaO}^+$  404.2445; found 404.2435.

**5. Data for compounds 12 and 13**

**(3*R*,3*aR*,9*bR*)-2-Benzyl-3-phenyl-2,3,3*a*,9*b*-tetrahydroisoxazolo[4,5-*c*]isoquinolin-5(4*H*)-one (12*a*)**

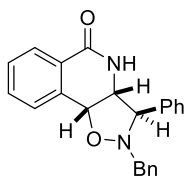

Yield: 82%; white solid; m.p. 160–161 °C;  $R_f$  = 0.11 (*n*-hexane/EtOAc 1:1 *v/v*);  $^1\text{H}$  NMR (500 MHz,  $\text{DMSO}-d_6$ , 60 °C):  $\delta$  = 8.36 (br s, 1H), 8.04 (d,  $J$  = 7.6 Hz, 1H), 7.61 – 7.50 (m, 6H), 7.40 (t,  $J$  = 7.5 Hz, 2H), 7.33 (t,  $J$  = 7.3 Hz, 1H), 7.28 – 7.18 (m, 4H), 5.23 (d,  $J$  = 6.2 Hz, 1H), 4.42 (t,  $J$  = 4.9 Hz, 1H), 4.17 (d,  $J$  = 4.0 Hz, 1H), 3.97 (d,  $J$  = 14.4 Hz, 1H), 3.90 (d,  $J$  = 14.3 Hz, 1H) ppm;  $^{13}\text{C}$  NMR (125 MHz,  $\text{DMSO}-d_6$ , 60 °C):  $\delta$  = 161.6, 138.9, 137.8, 133.8, 132.3, 130.0, 130.0, 128.7, 128.6, 128.14, 128.08, 128.06, 128.0, 127.3,

127.1, 78.3, 72.4, 65.0, 60.8 ppm; FT-IR (neat):  $\nu$  = 3179, 3047, 2934, 1668, 1606, 1586, 1419, 1350, 748, 700  $\text{cm}^{-1}$ ; HRMS (ESI),  $m/z$ :  $[M + \text{Na}]^+$  calcd for  $\text{C}_{23}\text{H}_{20}\text{N}_2\text{NaO}_2^+$  379.1417; found 379.1420.

(4*aR*,5*R*,7*aR*)-6-Benzyl-5-phenyl-4*a*,5,6,7*a*-tetrahydroisoxazolo[4,5-*c*]tetrazolo[5,1-*a*]isoquinoline (13*a*)

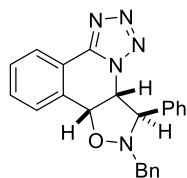

Yield: 14%; white solid; m.p. 170–171 °C;  $R_f$  = 0.40 (*n*-hexane/EtOAc 2:1 *v/v*);  $^1\text{H}$  NMR (500 MHz,  $\text{CDCl}_3$ ):  $\delta$  = 8.32 (dd,  $J$  = 7.3, 1.6 Hz, 1H), 7.76 (d,  $J$  = 7.2 Hz, 2H), 7.67 – 7.57 (m, 3H), 7.51 – 7.47 (m, 2H), 7.44 – 7.40 (m, 1H), 7.30 – 7.22 (m, 5H), 5.60 (d,  $J$  = 6.3 Hz, 1H), 5.24 (dd,  $J$  = 6.4, 4.4 Hz, 1H), 4.39 (d,  $J$  = 4.4 Hz, 1H), 3.99 (d,  $J$  = 14.5 Hz, 1H), 3.77 (d,  $J$  = 14.5 Hz, 1H) ppm;  $^{13}\text{C}$  NMR (125 MHz,  $\text{CDCl}_3$ ):  $\delta$  = 148.8, 136.2, 136.1, 132.2, 131.2, 130.9, 129.2, 129.0, 129.0, 128.9, 128.3, 128.2, 127.6, 126.0, 120.5, 78.52, 75.5, 68.3, 59.7 ppm; FT-IR (neat):  $\nu$  = 3081, 3022, 2859, 1555, 1490, 1447, 1157, 983, 788, 738, 702  $\text{cm}^{-1}$ ; HRMS (ESI),  $m/z$ :  $[M + \text{Na}]^+$  calcd for  $\text{C}_{23}\text{H}_{19}\text{N}_5\text{NaO}^+$  404.1482; found 404.1474.

(3*R*,3*aR*,9*bR*)-2-Benzyl-3-(*p*-tolyl)-2,3,3*a*,9*b*-tetrahydroisoxazolo[4,5-*c*]isoquinolin-5(4*H*)-one (12*b*)

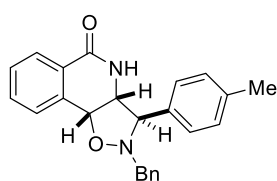

Yield: 72%; white solid; m.p. 156–157 °C;  $R_f$  = 0.43 (*n*-hexane/EtOAc 1:1 *v/v*);  $^1\text{H}$  NMR (500 MHz,  $\text{DMSO}-d_6$ , 60 °C):  $\delta$  = 8.33 (br s, 1H), 8.04 (d,  $J$  = 7.6 Hz, 1H), 7.61 – 7.49 (m, 3H), 7.47 (d,  $J$  = 7.8 Hz, 2H), 7.28 – 7.17 (m, 7H), 5.22 (d,  $J$  = 6.2 Hz, 1H), 4.38 (t,  $J$  = 5.2 Hz, 1H), 4.11 (d,  $J$  = 4.1 Hz, 1H), 3.95 (d,  $J$  = 14.5 Hz, 1H), 3.86 (d,  $J$  = 14.4 Hz, 1H), 2.32 (s, 3H) ppm;  $^{13}\text{C}$  NMR (125 MHz,  $\text{DMSO}-d_6$ , 60 °C):  $\delta$  = 161.6, 137.9, 137.3, 135.8, 133.9, 132.3, 130.00, 129.45, 129.3, 128.7, 128.2, 128.0, 127.3, 127.1, 78.2, 72.4, 64.9, 60.7, 20.9 ppm; FT-IR (neat):  $\nu$  = 3186, 3023, 2924, 1667, 1496, 1418, 1026, 762, 741, 695  $\text{cm}^{-1}$ ; HRMS (ESI),  $m/z$ :  $[M + \text{Na}]^+$  calcd for  $\text{C}_{24}\text{H}_{22}\text{N}_2\text{NaO}_2^+$  393.1573; found 393.1580.

(4*aR*,5*R*,7*aR*)-6-Benzyl-5-(*p*-tolyl)-4*a*,5,6,7*a*-tetrahydroisoxazolo[4,5-*c*]tetrazolo[5,1-*a*]isoquinoline (13*a*)

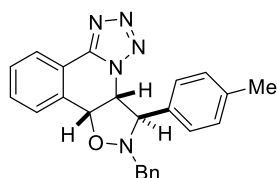

Yield: 14%; white solid; m.p. 162–163 °C;  $R_f$  = 0.66 (*n*-hexane/EtOAc 1:1 *v/v*);  $^1\text{H}$  NMR (500 MHz,  $\text{CDCl}_3$ ):  $\delta$  = 8.31 (dd,  $J$  = 7.2, 1.6 Hz, 1H), 7.66 – 7.57 (m, 5H), 7.30 (d,  $J$  = 7.8 Hz, 2H), 7.28 – 7.22 (m, 5H), 5.59 (d,  $J$  = 6.5 Hz, 1H), 5.22 (dd,  $J$  = 6.5, 4.6 Hz, 1H), 4.33 (d,  $J$  = 4.6 Hz, 1H), 3.99 (d,  $J$  = 14.5 Hz, 1H), 3.73 (d,  $J$  = 14.5 Hz, 1H), 2.42 (s, 3H) ppm;  $^{13}\text{C}$  NMR (125 MHz,  $\text{CDCl}_3$ ):  $\delta$  = 148.8, 138.9, 136.6, 133.4, 132.2, 131.2, 130.8, 129.9, 129.2, 128.8, 128.19, 128.15, 127.4, 126.0, 120.5, 78.5, 75.4, 68.4, 59.6, 21.2 ppm; FT-IR (neat):  $\nu$  = 3065, 3031, 2896, 1494, 1452, 1430, 1367, 1318, 1056, 964, 817, 757, 696  $\text{cm}^{-1}$ ; HRMS (ESI),  $m/z$ :  $[M + \text{Na}]^+$  calcd for  $\text{C}_{24}\text{H}_{21}\text{N}_5\text{NaO}^+$  418.1638; found 418.1644.

(3*R*,3*aR*,9*bR*)-2-Benzyl-3-(4-methoxyphenyl)-2,3,3*a*,9*b*-tetrahydroisoxazolo[4,5-*c*]isoquinolin-5(4*H*)-one (**12c**)

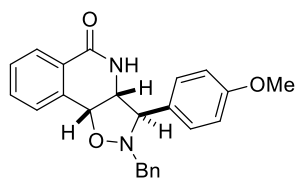

Yield: 83%; white solid; m.p. 151–152 °C;  $R_f$  = 0.40 (*n*-hexane/EtOAc 1:1 *v/v*);  $^1\text{H}$  NMR (500 MHz, DMSO- $d_6$ , 60 °C):  $\delta$  = 8.31 (br s, 1H), 8.02 (d,  $J$  = 7.6 Hz, 1H), 7.59 (td,  $J$  = 7.4, 1.5 Hz, 1H), 7.56 – 7.51 (m, 2H), 7.49 (d,  $J$  = 8.8 Hz, 2H), 7.28 – 7.18 (m, 5H), 6.96 (d,  $J$  = 8.7 Hz, 2H), 5.22 (d,  $J$  = 6.3 Hz, 1H), 4.37 (ddd,  $J$  = 6.2, 4.2, 1.7 Hz, 1H), 4.06 (d,  $J$  = 4.2 Hz, 1H), 3.94 (d,  $J$  = 14.5 Hz, 1H), 3.84 (d,  $J$  = 14.5 Hz, 1H), 3.77 (s, 3H) ppm;  $^{13}\text{C}$  NMR (125 MHz, DMSO- $d_6$ , 60 °C):  $\delta$  = 161.6, 159.3, 138.0, 133.9, 132.4, 130.6, 130.0, 130.0, 129.3, 128.7, 128.2, 128.1, 127.3, 127.1, 114.2, 78.1, 72.3, 64.8, 60.5, 55.4 ppm; FT-IR (neat):  $\nu$  = 3175, 3035, 2924, 1672, 1511, 1415, 1249, 1173, 1029, 759  $\text{cm}^{-1}$ ; HRMS (ESI),  $m/z$ :  $[\text{M} + \text{Na}]^+$  calcd for  $\text{C}_{24}\text{H}_{22}\text{N}_2\text{NaO}_3^+$  409.1523; found 409.1529.

(4*aR*,5*R*,7*aR*)-6-Benzyl-5-(4-methoxyphenyl)-4*a*,5,6,7*a*-tetrahydroisoxazolo[4,5-*c*]tetrazolo[5,1-*a*]isoquinoline (**13c**)

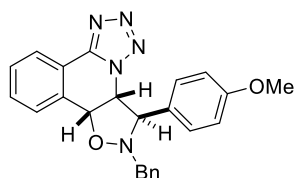

Yield: 14%; white solid; m.p. 139–140 °C;  $R_f$  = 0.57 (*n*-hexane/EtOAc 1:1 *v/v*);  $^1\text{H}$  NMR (500 MHz,  $\text{CDCl}_3$ ):  $\delta$  = 8.31 (dd,  $J$  = 7.3, 1.7 Hz, 1H), 7.68 – 7.57 (m, 5H), 7.30 – 7.22 (m, 5H), 7.01 (d,  $J$  = 8.7 Hz, 2H), 5.60 (d,  $J$  = 6.6 Hz, 1H), 5.22 (dd,  $J$  = 6.6, 4.6 Hz, 1H), 4.29 (d,  $J$  = 4.6 Hz, 1H), 3.99 (d,  $J$  = 14.6 Hz, 1H), 3.86 (s, 3H), 3.73 (d,  $J$  = 14.5 Hz, 1H) ppm;  $^{13}\text{C}$  NMR (125 MHz,  $\text{CDCl}_3$ ):  $\delta$  = 160.1, 148.8, 136.5, 132.2, 131.2, 130.8, 130.0, 129.2, 128.8, 128.20, 128.17, 127.4, 126.0, 120.5, 114.6, 78.3, 75.3, 68.3, 59.5, 55.4 ppm; FT-IR (neat):  $\nu$  = 3064, 3032, 2891, 2835, 1612, 1516, 1454, 1247, 1182, 1033, 962, 833, 754, 712, 695  $\text{cm}^{-1}$ ; HRMS (ESI),  $m/z$ :  $[\text{M} + \text{Na}]^+$  calcd for  $\text{C}_{24}\text{H}_{21}\text{N}_5\text{NaO}_2^+$  434.1587; found 434.1577.

(3*R*,3*aR*,9*bR*)-2-Benzyl-3-(4-hydroxyphenyl)-2,3,3*a*,9*b*-tetrahydroisoxazolo[4,5-*c*]isoquinolin-5(4*H*)-one (**12d**)

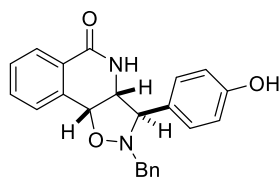

Yield: 75%; white solid; m.p. 161–162.5 °C;  $R_f$  = 0.20 (*n*-hexane/EtOAc 1:1 *v/v*);  $^1\text{H}$  NMR (500 MHz, DMSO- $d_6$ , 60 °C):  $\delta$  = 9.28 (br s, 1H), 8.28 (br s, 1H), 8.03 (d,  $J$  = 7.6 Hz, 1H), 7.59 (td,  $J$  = 7.4, 1.5 Hz, 1H), 7.54 – 7.48 (m, 2H), 7.37 (d,  $J$  = 8.5 Hz, 2H), 7.28 – 7.17 (m, 5H), 6.81 (d,  $J$  = 8.4 Hz, 2H), 5.22 (d,  $J$  = 6.4 Hz, 1H), 4.36 (t,  $J$  = 4.8 Hz, 2H), 4.00 (d,  $J$  = 4.3 Hz, 1H), 3.93 (d,  $J$  = 14.5 Hz, 1H), 3.81 (d,  $J$  = 14.5 Hz, 1H) ppm;  $^{13}\text{C}$  NMR (125 MHz, DMSO- $d_6$ , 60 °C):  $\delta$  = 161.6, 157.4, 138.1, 134.1, 132.4, 130.0, 129.4, 129.3, 128.71, 128.70, 128.2, 128.0, 127.3, 127.1, 115.6, 78.3, 72.3, 64.7, 60.4 ppm; FT-IR (neat):  $\nu$  = 3328, 3196, 3047, 1679, 1520, 1419, 1261, 1179, 765, 728, 699  $\text{cm}^{-1}$ ; HRMS (ESI),  $m/z$ :  $[\text{M} + \text{Na}]^+$  calcd for  $\text{C}_{23}\text{H}_{20}\text{N}_2\text{NaO}_3^+$  395.1366; found 395.1371.

(3*R*,3*aR*,9*bR*)-2-Benzyl-3-(4-morpholinophenyl)-2,3,3*a*,9*b*-tetrahydroisoxazolo[4,5-*c*]isoquinolin-5(4*H*)-one (**12e**)

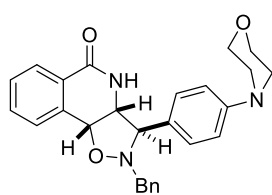

Yield: 84%; white solid; m.p. 158.5–159.5 °C;  $R_f$  = 0.17 (*n*-hexane/THF 1:1 *v/v*);  $^1\text{H}$  NMR (500 MHz,  $\text{DMSO-}d_6$ , 60 °C):  $\delta$  = 8.28 (br s, 1H), 8.02 (d,  $J$  = 7.6 Hz, 1H), 7.59 (td,  $J$  = 7.4, 1.5 Hz, 1H), 7.55 – 7.49 (m, 2H), 7.42 (d,  $J$  = 8.6 Hz, 2H), 7.28 – 7.18 (m, 5H), 6.96 (d,  $J$  = 8.5 Hz, 2H), 5.22 (d,  $J$  = 6.3 Hz, 1H), 4.37 (t,  $J$  = 4.6 Hz, 1H), 4.02 (d,  $J$  = 4.3 Hz, 1H), 3.94 (d,  $J$  = 14.5 Hz, 1H), 3.82 (d,  $J$  = 14.5 Hz, 1H), 3.75 (t,  $J$  = 4.8 Hz, 4H), 3.13 (t,  $J$  = 4.8 Hz, 4H) ppm;  $^{13}\text{C}$  NMR (125 MHz,  $\text{DMSO-}d_6$ , 60 °C):  $\delta$  = 161.6, 151.0, 138.1, 134.0, 132.3, 130.0, 129.4, 128.9, 128.8, 128.7, 128.1, 128.0, 127.3, 127.0, 115.2, 78.2, 72.3, 66.4, 64.7, 60.4, 48.7 ppm; FT-IR (neat):  $\nu$  = 3184, 3043, 2954, 1667, 1516, 1417, 1241, 1123, 930, 734  $\text{cm}^{-1}$ ; HRMS (ESI),  $m/z$ :  $[\text{M} + \text{Na}]^+$  calcd for  $\text{C}_{27}\text{H}_{27}\text{N}_3\text{NaO}_3^+$  464.1945; found 464.1949.

(4*aR*,5*R*,7*aR*)-6-Benzyl-5-(4-morpholinophenyl)-4*a*,5,6,7*a*-tetrahydroisoxazolo[4,5-*c*]tetrazolo[5,1-*a*]isoquinoline (**13e**)

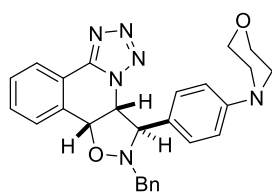

Yield: 14%; white solid; m.p. 164–166 °C;  $R_f$  = 0.43 (*n*-hexane/EtOAc 1:1 *v/v*);  $^1\text{H}$  NMR (500 MHz,  $\text{CDCl}_3$ ):  $\delta$  = 8.31 (dd,  $J$  = 7.3, 1.7 Hz, 1H), 7.66 – 7.57 (m, 5H), 7.31 – 7.22 (m, 5H), 7.03 (d,  $J$  = 8.2 Hz, 2H), 5.59 (d,  $J$  = 6.6 Hz, 1H), 5.22 (dd,  $J$  = 6.6, 4.6 Hz, 1H), 4.26 (d,  $J$  = 4.7 Hz, 1H), 3.99 (d,  $J$  = 14.6 Hz, 1H), 3.90 (t,  $J$  = 4.8 Hz, 4H), 3.71 (d,  $J$  = 14.5 Hz, 1H), 3.24 (t,  $J$  = 4.8 Hz, 4H) ppm;  $^{13}\text{C}$  NMR (125 MHz,  $\text{CDCl}_3$ ):  $\delta$  = 148.8, 136.7, 132.2, 131.2, 130.8, 129.3, 129.2, 128.8, 128.2, 127.4, 126.0, 120.5, 116.0, 78.4, 75.3, 68.2, 66.8, 59.5, 49.0 ppm; FT-IR (neat):  $\nu$  = 3034, 2949, 2894, 1608, 1516, 1454, 1235, 1118, 1053, 923, 761, 712, 696  $\text{cm}^{-1}$ ; HRMS (ESI),  $m/z$ :  $[\text{M} + \text{Na}]^+$  calcd for  $\text{C}_{27}\text{H}_{26}\text{N}_6\text{NaO}_2^+$  489.2009; found 489.2011.

(3*R*,3*aR*,9*bR*)-2-Benzyl-3-(4-(trifluoromethyl)phenyl)-2,3,3*a*,9*b*-tetrahydroisoxazolo[4,5-*c*]isoquinolin-5(4*H*)-one (**12f**)

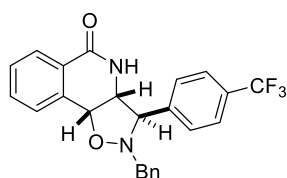

Yield: 85%; white solid; m.p. 158–159 °C;  $R_f$  = 0.31 (*n*-hexane/EtOAc 21:1 *v/v*);  $^1\text{H}$  NMR (500 MHz,  $\text{DMSO-}d_6$ , 60 °C):  $\delta$  = 8.39 (br s, 1H), 8.04 (d,  $J$  = 7.6 Hz, 1H), 7.80 (d,  $J$  = 8.1 Hz, 2H), 7.74 (d,  $J$  = 8.2 Hz, 2H), 7.61 (td,  $J$  = 7.4, 1.5 Hz, 1H), 7.57 – 7.52 (m, 2H), 7.27 – 7.17 (m, 5H), 5.24 (d,  $J$  = 6.1 Hz, 1H), 4.45 (ddd,  $J$  = 5.9, 3.9, 1.7 Hz, 1H), 4.31 (d,  $J$  = 3.8 Hz, 1H), 3.98 (s, 2H) ppm;  $^{13}\text{C}$  NMR (125 MHz,  $\text{DMSO-}d_6$ , 60 °C):  $\delta$  = 161.8, 144.0, 137.7, 134.0, 132.7, 130.3, 129.8, 129.12, 129.07, 128.9 (q,  $J$  = 27.5 Hz), 128.4, 128.2, 127.6, 127.4, 125.7 (q,  $J$  = 3.8 Hz), 124.7 (q,  $J$  = 27.1 Hz), 77.8, 72.8, 65.3, 61.4 ppm;  $^{19}\text{F}$  NMR (470 MHz,  $\text{DMSO-}d_6$ ):  $\delta$  = –62.69 (s, 3F) ppm; FT-IR (neat):  $\nu$  = 3182, 3046, 1668, 1585, 1421, 1328, 1165, 1113, 1070, 837, 759, 699  $\text{cm}^{-1}$ ; HRMS (ESI),  $m/z$ :  $[\text{M} + \text{Na}]^+$  calcd for  $\text{C}_{24}\text{H}_{19}\text{F}_3\text{N}_2\text{NaO}_2^+$  447.1291; found 447.1299.

(4a*R*,5*R*,7a*R*)-6-Benzyl-5-(4-(trifluoromethyl)phenyl)-4a,5,6,7a-tetrahydroisoxazolo[4,5-*c*]tetrazolo[5,1-*a*]isoquinoline (**13f**)

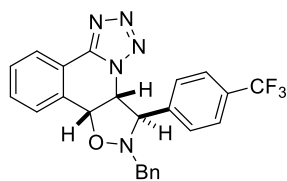

Yield: 14%; white solid; m.p. 164–165 °C;  $R_f$  = 0.66 (*n*-hexane/EtOAc 2:1 *v/v*);  $^1\text{H}$  NMR (500 MHz,  $\text{CDCl}_3$ ):  $\delta$  = 8.33 (dd,  $J$  = 7.1, 1.7 Hz, 1H), 7.90 (d,  $J$  = 8.0 Hz, 2H), 7.74 (d,  $J$  = 8.1 Hz, 2H), 7.69 – 7.60 (m, 3H), 7.30 – 7.22 (m, 5H), 5.60 (d,  $J$  = 6.4 Hz, 1H), 5.22 (dd,  $J$  = 6.4, 4.4 Hz, 1H), 4.47 (d,  $J$  = 4.3 Hz, 1H), 3.94 (d,  $J$  = 14.3 Hz, 1H), 3.85 (d,  $J$  = 14.3 Hz, 1H) ppm;  $^{13}\text{C}$  NMR (125 MHz,  $\text{CDCl}_3$ ):  $\delta$  = 148.9, 140.7, 135.8, 132.4, 131.22, 131.15 (q,  $J$  = 32.4 Hz), 131.05, 128.9, 128.8, 128.6, 128.3, 127.7, 126.2 (q,  $J$  = 3.7 Hz), 126.1, 123.9 (q,  $J$  = 272.3 Hz), 120.4, 77.9, 75.5, 68.4, 60.1 ppm;  $^{19}\text{F}$  NMR (470 MHz,  $\text{CDCl}_3$ ):  $\delta$  = –62.72 (s, 3F) ppm; FT-IR (neat):  $\nu$  = 3036, 2881, 1616, 1455, 1322, 1161, 1122, 1112, 1067, 839, 788, 761, 695  $\text{cm}^{-1}$ ; HRMS (ESI),  $m/z$ :  $[\text{M} + \text{Na}]^+$  calcd for  $\text{C}_{24}\text{H}_{18}\text{F}_3\text{N}_5\text{NaO}^+$  472.1356; found 472.1357.

(3*R*,3a*R*,9b*R*)-2-Benzyl-3-(2-(trifluoromethyl)phenyl)-2,3,3a,9b-tetrahydroisoxazolo[4,5-*c*]isoquinolin-5(4*H*)-one (**12g**)

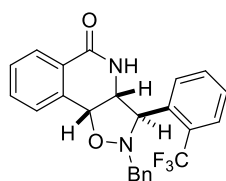

Yield: 82%; white solid; m.p. 158–159 °C;  $R_f$  = 0.46 (*n*-hexane/EtOAc 1:1 *v/v*);  $^1\text{H}$  NMR (500 MHz,  $\text{DMSO}-d_6$ , 60 °C):  $\delta$  = 8.08 (d,  $J$  = 7.3 Hz, 2H), 8.03 (d,  $J$  = 7.7 Hz, 1H), 7.80 – 7.73 (m, 2H), 7.62 (td,  $J$  = 7.5, 1.5 Hz, 1H), 7.57 – 7.50 (m, 3H), 7.27 – 7.17 (m, 5H), 5.39 (d,  $J$  = 6.8 Hz, 1H), 4.49 (td,  $J$  = 6.8, 6.2, 2.4 Hz, 1H), 4.45 (d,  $J$  = 4.4 Hz, 2H), 3.86 (s, 2H) ppm;  $^{13}\text{C}$  NMR (125 MHz,  $\text{DMSO}-d_6$ , 60 °C):  $\delta$  = 161.7, 137.6, 137.0, 135.1, 133.0, 132.6, 130.1, 129.4 (q,  $J$  = 31.5 Hz), 129.32, 129.31, 128.63, 128.61, 128.2, 127.4, 127.3, 127.2, 125.9 (q,  $J$  = 5.6 Hz), 124.5 (q,  $J$  = 274.4 Hz), 73.2, 72.1, 65.1, 61.1 ppm;  $^{19}\text{F}$  NMR (470 MHz,  $\text{DMSO}-d_6$ ):  $\delta$  = –57.04 (s, 3F) ppm; FT-IR (neat):  $\nu$  = 3193, 3068, 2944, 1675, 1606, 1411, 1311, 1122, 1034, 771, 754, 699  $\text{cm}^{-1}$ ; HRMS (ESI),  $m/z$ :  $[\text{M} + \text{K}]^+$  calcd for  $\text{C}_{24}\text{H}_{19}\text{F}_3\text{KN}_2\text{O}_2^+$  463.1030; found 463.1040.

(4a*R*,5*R*,7a*R*)-6-Benzyl-5-(2-(trifluoromethyl)phenyl)-4a,5,6,7a-tetrahydroisoxazolo[4,5-*c*]tetrazolo[5,1-*a*]isoquinoline (**13g**)

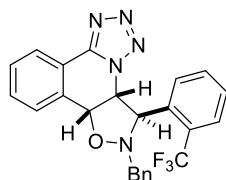

Yield: 14%; white solid; m.p. 178–180 °C;  $R_f$  = 0.57 (*n*-hexane/EtOAc 1:1 *v/v*);  $^1\text{H}$  NMR (500 MHz,  $\text{CDCl}_3$ ):  $\delta$  = 8.33 (d,  $J$  = 7.5 Hz, 1H), 8.14 (d,  $J$  = 7.9 Hz, 1H), 7.78 (d,  $J$  = 7.9 Hz, 1H), 7.74 (t,  $J$  = 7.6 Hz, 1H), 7.66 – 7.59 (m, 3H), 7.55 (t,  $J$  = 7.7 Hz, 1H), 7.29 – 7.20 (m, 5H), 5.69 (d,  $J$  = 6.7 Hz, 1H), 5.42 (dd,  $J$  = 6.7, 4.8 Hz, 1H), 4.99 (d,  $J$  = 4.7 Hz, 1H), 3.76 (s, 2H) ppm;  $^{13}\text{C}$  NMR (125 MHz,  $\text{CDCl}_3$ ):  $\delta$  = 149.0, 136.5, 135.0, 132.6, 132.3, 130.8, 130.6, 130.1, 129.9, 129.6 (q,  $J$  = 30.1 Hz), 129.1, 128.7, 128.2, 127.5, 126.6 (q,  $J$  = 5.8 Hz), 126.1, 125.0, 120.0, 75.4, 72.7, 68.3, 60.3 ppm;  $^{19}\text{F}$  NMR (470 MHz,  $\text{CDCl}_3$ ):  $\delta$  = –57.10 (s, 3F) ppm; FT-IR (neat):  $\nu$  = 3040, 2916, 1450, 1312, 1283, 1155, 1126, 1035, 970, 786, 727, 695  $\text{cm}^{-1}$ ; HRMS (ESI),  $m/z$ :  $[\text{M} + \text{Na}]^+$  calcd for  $\text{C}_{24}\text{H}_{18}\text{F}_3\text{N}_5\text{NaO}^+$  472.1356; found 472.1364.

(3*R*,3*aR*,9*bR*)-2-Benzyl-3-(2-bromophenyl)-2,3,3*a*,9*b*-tetrahydroisoxazolo[4,5-*c*]isoquinolin-5(4*H*)-one (**12h**)

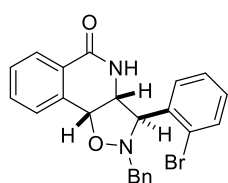

Yield: 87%; white solid; m.p. 150–151 °C;  $R_f$  = 0.48 (*n*-hexane/EtOAc 1:1 *v/v*);  $^1\text{H}$  NMR (500 MHz, DMSO- $d_6$ , 60 °C):  $\delta$  = 8.55 (br s, 1H), 8.01 (dd,  $J$  = 7.7, 1.5 Hz, 1H), 7.86 (dd,  $J$  = 7.8, 1.7 Hz, 1H), 7.64 (dd,  $J$  = 8.0, 1.2 Hz, 1H), 7.60 (td,  $J$  = 7.4, 1.5 Hz, 1H), 7.55 (td,  $J$  = 7.5, 1.5 Hz, 1H), 7.52 – 7.46 (m, 2H), 7.28 (td,  $J$  = 7.7, 1.7 Hz, 1H), 7.26 – 7.17 (m, 5H), 5.15 (d,  $J$  = 5.7 Hz, 1H), 4.68 (d,  $J$  = 3.5 Hz, 1H), 4.47 (ddd,  $J$  = 5.6, 3.5, 1.7 Hz, 1H), 4.03 (s, 2H) ppm;  $^{13}\text{C}$  NMR (125 MHz, DMSO- $d_6$ , 60 °C):  $\delta$  = 161.9, 137.7, 137.6, 134.3, 132.9, 132.5, 130.1, 129.9, 129.8, 129.5, 128.7, 128.2, 128.1, 127.8, 127.4, 127.2, 123.7, 76.0, 72.6, 64.3, 61.7 ppm; FT-IR (neat):  $\nu$  = 3176, 3057, 2905, 1668, 1604, 1584, 1406, 1024, 752  $\text{cm}^{-1}$ ; HRMS (ESI),  $m/z$ :  $[\text{M} + \text{Na}]^+$  calcd for  $\text{C}_{23}\text{H}_{19}\text{BrN}_2\text{NaO}_2^+$  457.0522; found 457.0535.

4*aR*,5*R*,7*aR*)-6-Benzyl-5-(2-bromophenyl)-4*a*,5,6,7*a*-tetrahydroisoxazolo[4,5-*c*]tetrazolo[5,1-*a*]isoquinoline (**13h**)

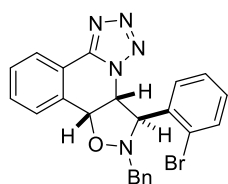

Yield: 12%; white solid; m.p. 174–176 °C;  $R_f$  = 0.60 (*n*-hexane/EtOAc 1:1 *v/v*);  $^1\text{H}$  NMR (500 MHz,  $\text{CDCl}_3$ ):  $\delta$  = 8.34 (d,  $J$  = 7.4 Hz, 1H), 7.90 (dd,  $J$  = 7.9, 1.8 Hz, 1H), 7.68 – 7.57 (m, 4H), 7.45 (td,  $J$  = 7.6, 1.3 Hz, 1H), 7.29 – 7.19 (m, 6H), 5.58 (d,  $J$  = 6.0 Hz, 1H), 5.38 (dd,  $J$  = 6.0, 3.7 Hz, 1H), 5.16 (d,  $J$  = 3.7 Hz, 1H), 3.81 (d,  $J$  = 13.9 Hz, 1H), 3.78 (d,  $J$  = 14.1 Hz, 1H) ppm;  $^{13}\text{C}$  NMR (125 MHz,  $\text{CDCl}_3$ ):  $\delta$  = 149.1, 136.3, 135.7, 133.7, 132.2, 130.9, 130.4, 130.3, 129.5, 128.8, 128.2, 128.0, 127.5, 126.2, 124.1, 120.4, 75.9, 75.7, 67.50, 60.9 ppm; FT-IR (neat):  $\nu$  = 3064, 2918, 1490, 1474, 1452, 1308, 1050, 961, 778, 756, 746, 696  $\text{cm}^{-1}$ ; HRMS (ESI),  $m/z$ :  $[\text{M} + \text{Na}]^+$  calcd for  $\text{C}_{23}\text{H}_{18}\text{BrN}_5\text{NaO}^+$  482.0587; found 482.0576.

(3*R*,3*aR*,9*bR*)-2-Benzyl-3-(2-morpholinophenyl)-2,3,3*a*,9*b*-tetrahydroisoxazolo[4,5-*c*]isoquinolin-5(4*H*)-one (**12i**)

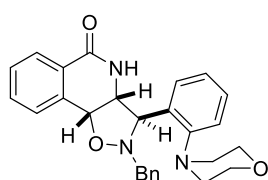

Yield: 84%; white solid; m.p. 140–141 °C;  $R_f$  = 0.41 (*n*-hexane/EtOAc 1:1 *v/v*);  $^1\text{H}$  NMR (500 MHz, DMSO- $d_6$ , 60 °C):  $\delta$  = 8.09 (br s, 1H), 8.03 (d,  $J$  = 7.7 Hz, 1H), 7.71 (dd,  $J$  = 7.7, 1.6 Hz, 1H), 7.62 (td,  $J$  = 7.5, 1.5 Hz, 1H), 7.56 – 7.51 (m, 2H), 7.36 – 7.29 (m, 2H), 7.27 – 7.17 (m, 6H), 5.27 (d,  $J$  = 6.5 Hz, 1H), 4.72 (d,  $J$  = 5.3 Hz, 1H), 4.46 (ddd,  $J$  = 6.5, 5.3, 2.3 Hz, 1H), 3.94 (d,  $J$  = 14.3 Hz, 1H), 3.88 (d,  $J$  = 14.3 Hz, 1H), 3.70 (t,  $J$  = 4.5 Hz, 4H), 2.86 (dt,  $J$  = 11.6, 4.5 Hz, 2H), 2.77 (dt,  $J$  = 11.6, 4.5 Hz, 2H) ppm;  $^{13}\text{C}$  NMR (125 MHz, DMSO- $d_6$ , 60 °C):  $\delta$  = 161.9, 152.3, 138.1, 135.4, 134.5, 132.5, 129.5, 129.2, 128.9, 128.7, 128.4, 128.1, 127.7, 127.3, 127.0, 125.4, 122.2, 72.3, 72.1, 66.8, 64.1, 61.2, 53.6 ppm; FT-IR (neat):  $\nu$  = 3177, 3032, 2899, 1667, 1584, 1404, 1342, 1113, 931, 771, 755  $\text{cm}^{-1}$ ; HRMS (ESI),  $m/z$ :  $[\text{M} + \text{H}]^+$  calcd for  $\text{C}_{27}\text{H}_{28}\text{N}_3\text{O}_3^+$  442.2125; found 442.2133.

(4*aR*,5*R*,7*aR*)-6-Benzyl-5-(2-morpholinophenyl)-4*a*,5,6,7*a*-tetrahydroisoxazolo[4,5-*c*]tetrazolo[5,1-*a*]isoquinoline (**13i**)

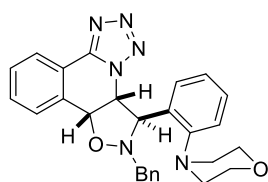

Yield: 8%; white solid; m.p. 168–170 °C;  $R_f$  = 0.56 (*n*-hexane/EtOAc 1:1 *v/v*);  $^1\text{H}$  NMR (500 MHz,  $\text{CDCl}_3$ ):  $\delta$  = 8.34 (d,  $J$  = 7.4 Hz, 1H), 7.85 (dd,  $J$  = 8.0, 1.6 Hz, 1H), 7.67 – 7.58 (m, 3H), 7.43 (td,  $J$  = 7.5, 1.6 Hz, 1H), 7.37 – 7.32 (m, 2H), 7.26 – 7.17 (m, 5H), 5.61 (d,  $J$  = 5.7 Hz, 1H), 5.38 – 5.34 (m, 2H), 3.89 – 3.77 (m, 5H), 3.69 (d,  $J$  = 13.8 Hz, 1H), 3.09 – 3.04 (m, 2H), 2.77 (br s, 2H) ppm;  $^{13}\text{C}$  NMR (125 MHz,  $\text{CDCl}_3$ ):  $\delta$  = 152.1, 149.1, 136.6, 133.2, 132.2, 130.9, 130.8, 129.8, 129.4, 128.7, 128.2, 127.4, 126.1, 125.9, 122.6, 120.5, 76.0, 71.7, 67.9, 67.3, 60.7, 53.8 ppm; FT-IR (neat):  $\nu$  = 3063, 2892, 2854, 1491, 1451, 1316, 1223, 1114, 1058, 971, 932, 796, 729, 695  $\text{cm}^{-1}$ ; HRMS (ESI),  $m/z$ :  $[\text{M} + \text{H}]^+$  calcd for  $\text{C}_{27}\text{H}_{27}\text{N}_6\text{O}_2^+$  467.2190; found 467.2199.

(3*R*,3*aR*,9*bR*)-2-Benzyl-3-(pyridin-3-yl)-2,3,3*a*,9*b*-tetrahydroisoxazolo[4,5-*c*]isoquinolin-5(4*H*)-one (**12j**)

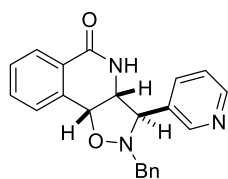

Yield: 64%; off-white solid; m.p. 166–168 °C;  $R_f$  = 0.24 (DCM:acetone 3:1 *v/v*);  $^1\text{H}$  NMR (500 MHz,  $\text{DMSO}-d_6$ , 60 °C):  $\delta$  = 8.70 (d,  $J$  = 2.2 Hz, 1H), 8.51 (dd,  $J$  = 4.8, 1.7 Hz, 1H), 8.37 (br s, 1H), 8.03 (d,  $J$  = 7.6 Hz, 1H), 7.93 (dt,  $J$  = 7.8, 2.0 Hz, 1H), 7.61 (td,  $J$  = 7.4, 1.5 Hz, 1H), 7.58 – 7.52 (m, 2H), 7.40 (dd,  $J$  = 7.9, 4.8 Hz, 1H), 7.26 – 7.16 (m, 5H), 5.27 (d,  $J$  = 6.2 Hz, 1H), 4.47 (ddd,  $J$  = 6.0, 4.0, 1.7 Hz, 1H), 4.20 (d,  $J$  = 4.0 Hz, 1H), 3.95 (s, 2H) ppm;  $^{13}\text{C}$  NMR (125 MHz,  $\text{DMSO}-d_6$ , 60 °C):  $\delta$  = 161.6, 149.6, 149.3, 137.5, 135.8, 134.5, 133.7, 132.5, 130.1, 129.6, 128.9, 128.2, 128.0, 127.4, 127.3, 123.7, 76.3, 72.5, 64.9, 60.9 ppm; FT-IR (neat):  $\nu$  = 3188, 3061, 2869, 1670, 1418, 1364, 1343, 1028, 763, 733  $\text{cm}^{-1}$ ; HRMS (ESI),  $m/z$ :  $[\text{M} + \text{Na}]^+$  calcd for  $\text{C}_{22}\text{H}_{19}\text{N}_3\text{NaO}_2^+$  380.1369; found 380.1377.

(3*R*,3*aR*,9*bR*)-2-Benzyl-3-(perfluorophenyl)-2,3,3*a*,9*b*-tetrahydroisoxazolo[4,5-*c*]isoquinolin-5(4*H*)-one (**12m**)

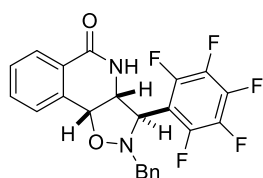

Yield: 81%; white solid; m.p. 182–183 °C;  $R_f$  = 0.20 (*n*-hexane/EtOAc 3:1 *v/v*);  $^1\text{H}$  NMR (500 MHz,  $\text{DMSO}-d_6$ , 60 °C):  $\delta$  = 8.36 (br s, 1H), 8.05 (d,  $J$  = 8.0 Hz, 1H), 7.64 (td,  $J$  = 7.2, 1.5 Hz, 1H), 7.60 – 7.55 (m, 2H), 7.25 – 7.15 (m, 5H), 5.37 (d,  $J$  = 6.8 Hz, 1H), 4.77 (ddd,  $J$  = 7.0, 5.2, 1.9 Hz, 1H), 4.19 (d,  $J$  = 5.1 Hz, 1H), 4.06 (d,  $J$  = 13.7 Hz, 1H), 3.90 (d,  $J$  = 13.6 Hz, 1H) ppm;  $^{13}\text{C}$  NMR (125 MHz,  $\text{DMSO}-d_6$ , 60 °C):  $\delta$  = 161.2, 136.5, 132.9, 132.5, 130.3, 129.7, 128.8, 128.0, 127.8, 127.4, 127.3, 72.3, 70.9, 61.9, 60.8 ppm;  $^{19}\text{F}$  NMR (470 MHz,  $\text{DMSO}-d_6$ ):  $\delta$  = –139.38 (d,  $J$  = 14.6 Hz, 2F), –153.11 (t,  $J$  = 20.9 Hz, 1F), –161.59 (td,  $J$  = 22.1, 8.0 Hz, 2F) ppm; FT-IR (neat):  $\nu$  = 3207, 3062, 2956, 1683, 1521, 1504, 1415, 1339, 1131, 1006, 958, 759, 698  $\text{cm}^{-1}$ ; HRMS (ESI),  $m/z$ :  $[\text{M} + \text{Na}]^+$  calcd for  $\text{C}_{23}\text{H}_{15}\text{F}_5\text{N}_2\text{NaO}_2^+$  469.0946; found 469.0947.

(4*aR*,5*R*,7*aR*)-6-Benzyl-5-(perfluorophenyl)-4*a*,5,6,7*a*-tetrahydroisoxazolo[4,5-*c*]tetrazolo[5,1-*a*]isoquinoline (**13m**)

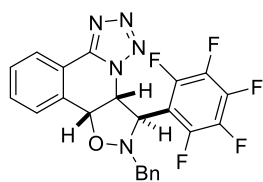

Yield: 12%; white solid; m.p. 175.5–176.5 °C;  $R_f$  = 0.33 (*n*-hexane/EtOAc 3:1 *v/v*);  $^1\text{H}$  NMR (500 MHz,  $\text{CDCl}_3$ ):  $\delta$  = 8.34 (dd,  $J$  = 7.3, 1.8 Hz, 1H), 7.74 – 7.63 (m, 3H), 7.24 – 7.18 (m, 4H), 5.75 (d,  $J$  = 6.3 Hz, 1H), 5.55 (dd,  $J$  = 6.3, 4.6 Hz, 1H), 4.58 (d,  $J$  = 4.6 Hz, 1H), 4.24 (d,  $J$  = 13.3 Hz, 1H), 3.78 (d,  $J$  = 13.3 Hz, 1H) ppm;  $^{13}\text{C}$  NMR (125 MHz,  $\text{CDCl}_3$ ):  $\delta$  = 148.9, 134.7, 132.5, 131.4, 131.3, 128.7, 128.4, 128.1, 127.9, 126.2, 120.5, 75.5, 69.3, 65.8, 61.0 ppm;  $^{19}\text{F}$  NMR (470 MHz,  $\text{CDCl}_3$ ):  $\delta$  = –139.63 (d,  $J$  = 15.6 Hz, 2F), –151.74 (t,  $J$  = 20.8 Hz, 1F), –160.75 (td,  $J$  = 22.1, 21.3, 8.0 Hz, 2F) ppm; FT-IR (neat):  $\nu$  = 3031, 2913, 1522, 1506, 1455, 1343, 1064, 1012, 959, 948, 755, 710, 699  $\text{cm}^{-1}$ ; HRMS (ESI),  $m/z$ :  $[\text{M} + \text{Na}]^+$  calcd for  $\text{C}_{23}\text{H}_{14}\text{F}_5\text{N}_5\text{NaO}^+$  494.1011; found 494.1020.

(3*R*,3*aR*,9*bR*)-2-Benzyl-3-heptyl-2,3,3*a*,9*b*-tetrahydroisoxazolo[4,5-*c*]isoquinolin-5(4*H*)-one (**12n**)

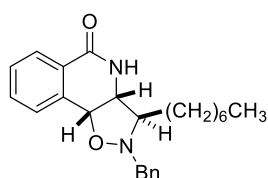

Yield: 90%; white solid; m.p. 119.5–120.5 °C;  $R_f$  = 0.54 (*n*-hexane/EtOAc 1:1 *v/v*);  $^1\text{H}$  NMR (500 MHz,  $\text{DMSO}-d_6$ , 60 °C):  $\delta$  = 8.12 (br s, 1H), 8.01 (d,  $J$  = 7.6 Hz, 1H), 7.58 (td,  $J$  = 7.4, 1.5 Hz, 1H), 7.53 (td,  $J$  = 7.5, 1.4 Hz, 1H), 7.48 (d,  $J$  = 7.3 Hz, 1H), 7.31 – 7.21 (m, 5H), 4.99 (d,  $J$  = 5.4 Hz, 1H), 4.19 (d,  $J$  = 4.7 Hz, 1H), 4.01 (d,  $J$  = 13.7 Hz, 1H), 3.93 (d,  $J$  = 13.7 Hz, 1H), 3.22 (dd,  $J$  = 6.6, 2.6 Hz, 1H), 1.54 (q,  $J$  = 7.3 Hz, 2H), 1.42 – 1.21 (m, 10H), 0.87 (t,  $J$  = 6.9 Hz, 3H) ppm;  $^{13}\text{C}$  NMR (125 MHz,  $\text{DMSO}-d_6$ , 60 °C):  $\delta$  = 161.8, 138.2, 134.0, 132.2, 130.0, 129.4, 129.0, 128.3, 128.2, 127.3, 127.1, 73.6, 72.6, 62.3, 61.9, 32.5, 31.4, 29.2, 28.7, 25.4, 22.2, 14.0 ppm; FT-IR (neat):  $\nu$  = 3185, 3034, 2924, 2852, 1667, 1585, 1421, 762, 692  $\text{cm}^{-1}$ ; HRMS (ESI),  $m/z$ :  $[\text{M} + \text{Na}]^+$  calcd for  $\text{C}_{24}\text{H}_{30}\text{N}_2\text{NaO}_2^+$  401.2199; found 401.2190.

(4*aR*,5*R*,7*aR*)-6-Benzyl-5-heptyl-4*a*,5,6,7*a*-tetrahydroisoxazolo[4,5-*c*]tetrazolo[5,1-*a*]isoquinoline (**13n**)

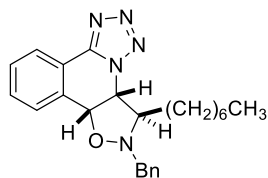

Yield: 9%; white solid; m.p. 126–127 °C;  $R_f$  = 0.86 (*n*-hexane/EtOAc 1:1 *v/v*);  $^1\text{H}$  NMR (500 MHz,  $\text{CDCl}_3$ ):  $\delta$  = 8.31 (d,  $J$  = 7.8 Hz, 1H), 7.65 – 7.56 (m, 3H), 7.33 – 7.24 (m, 5H), 5.34 (d,  $J$  = 5.4 Hz, 1H), 4.98 (dd,  $J$  = 5.5, 2.8 Hz, 1H), 3.85 (s, 2H), 3.74 (td,  $J$  = 6.5, 2.8 Hz, 1H), 1.86 – 1.80 (m, 2H), 1.66 – 1.59 (m, 2H), 1.44 – 1.25 (m, 8H), 0.90 (t,  $J$  = 6.8 Hz, 3H) ppm;  $^{13}\text{C}$  NMR (125 MHz,  $\text{CDCl}_3$ ):  $\delta$  = 149.1, 136.2, 132.1, 131.0, 130.9, 129.4, 129.1, 128.4, 127.6, 126.0, 120.7, 75.5, 73.4, 65.8, 61.7, 32.8, 31.7, 29.5, 29.1, 25.9, 22.6, 14.1 ppm; FT-IR (neat):  $\nu$  = 3061, 2945, 2923, 2854, 1491, 1455, 1111, 789, 744, 710  $\text{cm}^{-1}$ ; HRMS (ESI),  $m/z$ :  $[\text{M} + \text{Na}]^+$  calcd for  $\text{C}_{24}\text{H}_{30}\text{N}_2\text{NaO}_2^+$  426.2264; found 426.2266.

## 6. Data for compounds **18**

### 2-(3-(*p*-Tolyl)isoxazol-5-yl)benzamide (**18b**)

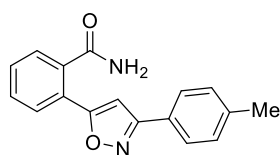

Yield: 89%; white solid; m.p. 176–177 °C;  $R_f$  = 0.36 (*n*-hexane/EtOAc 1:2 v/v);

$^1\text{H}$  NMR (500 MHz, DMSO- $d_6$ ):  $\delta$  = 8.00 (br s, 1H), 7.82 – 7.77 (m, 3H), 7.63 – 7.53 (m, 4H), 7.36 (d,  $J$  = 7.9 Hz, 2H), 7.22 (s, 1H), 2.38 (s, 3H) ppm;  $^{13}\text{C}$

NMR (125 MHz, DMSO- $d_6$ ):  $\delta$  = 170.7, 169.6, 162.5, 140.5, 137.4, 130.7, 130.2, 130.0, 128.8, 128.3, 126.9, 126.2, 124.7, 101.0, 21.5 ppm; FT-IR (neat):  $\nu$  = 3333, 3158, 2920, 1663, 1605, 1427, 1388, 918, 797, 758  $\text{cm}^{-1}$ ; HRMS (ESI),  $m/z$ :  $[\text{M} + \text{Na}]^+$  calcd for  $\text{C}_{17}\text{H}_{14}\text{N}_2\text{NaO}_2^+$  301.0947; found 301.0950.

### 2-(3-(4-Methoxyphenyl)isoxazol-5-yl)benzamide (**18c**)

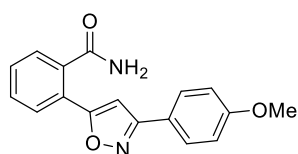

Yield: 87%; white solid; m.p. 175–176 °C;  $R_f$  = 0.47 (DCM/acetone 4:1 v/v);

$^1\text{H}$  NMR (500 MHz, DMSO- $d_6$ ):  $\delta$  = 7.98 (br s, 1H), 7.83 (d,  $J$  = 8.8 Hz, 2H), 7.82 – 7.78 (m, 1H), 7.62 – 7.52 (m, 4H), 7.19 (s, 1H), 7.10 (d,  $J$  = 8.8 Hz, 2H), 3.83 (s, 3H) ppm;  $^{13}\text{C}$  NMR (125 MHz, DMSO- $d_6$ ):  $\delta$  = 170.7, 169.4,

162.2, 161.2, 137.4, 130.7, 130.0, 128.8, 128.5, 128.3, 124.8, 121.4, 115.1, 100.9, 55.8 ppm; FT-IR (neat):  $\nu$  = 3336, 3164, 1662, 1614, 1433, 1390, 1247, 1026, 832, 799  $\text{cm}^{-1}$ ; HRMS (ESI),  $m/z$ :  $[\text{M} + \text{Na}]^+$  calcd for  $\text{C}_{17}\text{H}_{14}\text{N}_2\text{NaO}_3^+$  317.0897; found 317.0891.

### 2-(3-(4-(Trifluoromethyl)phenyl)isoxazol-5-yl)benzamide (**18d**)

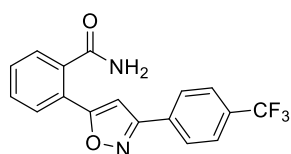

Yield: 86%; white solid; m.p. 178–179 °C;  $R_f$  = 0.17 (*n*-hexane/EtOAc 1:1 v/v);  $^1\text{H}$  NMR (500 MHz, DMSO- $d_6$ ):  $\delta$  = 8.13 (d,  $J$  = 8.1 Hz, 2H), 8.02 (br s, 1H), 7.92 (d,  $J$  = 8.1 Hz, 2H), 7.83 – 7.80 (m, 1H), 7.64 – 7.55 (m, 4H), 7.38

(s, 1H) ppm;  $^{13}\text{C}$  NMR (125 MHz, DMSO- $d_6$ ):  $\delta$  = 170.6, 170.5, 161.7, 137.5,

133.0, 130.99, 130.98 (q,  $J$  = 32.2 Hz, 1C), 130.2, 129.1, 128.5, 127.9, 126.7 (q,  $J$  = 4.0 Hz, 1C), 124.6, 124.5 (q,  $J$  = 272.4 Hz, 1C), 101.5 ppm;  $^{19}\text{F}$  NMR (470 MHz, DMSO- $d_6$ )  $\delta$  = –61.36 (s, 3F) ppm; FT-IR (neat):  $\nu$  = 3377, 3193, 1652, 1441, 1327, 1167, 1122, 1065, 952, 769  $\text{cm}^{-1}$ ; HRMS (ESI),  $m/z$ :  $[\text{M} + \text{Na}]^+$  calcd for  $\text{C}_{17}\text{H}_{11}\text{F}_3\text{N}_2\text{NaO}_2^+$  355.0665; found 355.0666.

### 2-(3-(4-Fluorophenyl)isoxazol-5-yl)benzamide (**18e**)

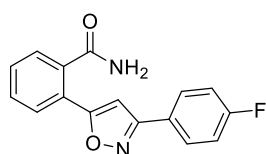

Yield: 88%; white solid; m.p. 175–176 °C;  $R_f$  = 0.46 (DCM/acetone 4:1 v/v);  $^1\text{H}$

NMR (500 MHz, DMSO- $d_6$ ):  $\delta$  = 8.00 (br s, 1H), 7.98 – 7.93 (m, 2H), 7.82 – 7.78 (m, 1H), 7.63 – 7.53 (m, 4H), 7.42 – 7.36 (m, 2H), 7.26 (s, 1H) ppm;  $^{13}\text{C}$

NMR (125 MHz, DMSO- $d_6$ ):  $\delta$  = 170.6, 170.0, 163.7 (d,  $J$  = 247.6 Hz, 1C),

161.7, 137.5, 130.8, 130.1, 129.4 (d,  $J$  = 8.6 Hz, 1C), 128.9, 128.4, 125.6 (d,  $J$  = 3.2 Hz, 1C), 124.7,

116.7 (d,  $J = 21.9$  Hz, 1C), 101.1 ppm;  $^{19}\text{F}$  NMR (470 MHz,  $\text{DMSO}-d_6$ )  $\delta = -110.59$  (ddd,  $J = 14.2, 8.9, 5.4$  Hz, 1F) ppm; FT-IR (neat):  $\nu = 3372, 3181, 1651, 1607, 1438, 1396, 1231, 1159, 950, 784$   $\text{cm}^{-1}$ ; HRMS (ESI),  $m/z$ :  $[\text{M} + \text{Na}]^+$  calcd for  $\text{C}_{16}\text{H}_{11}\text{FN}_2\text{NaO}_2^+$  305.0697; found 305.0690.

2-(3-(4-(tert-Butyl)phenyl)isoxazol-5-yl)benzamide (**18f**)

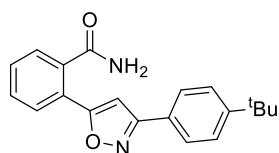

Yield: 91%; white solid; m.p. 165–166 °C;  $R_f = 0.54$  (DCM/acetone 4:1 v/v);  $^1\text{H}$  NMR (500 MHz,  $\text{DMSO}-d_6$ ):  $\delta = 8.00$  (br s, 1H), 7.84 – 7.80 (m, 3H), 7.62 – 7.53 (m, 6H), 7.22 (s, 1H), 1.32 (s, 9H) ppm;  $^{13}\text{C}$  NMR (125 MHz,  $\text{DMSO}-d_6$ ):  $\delta = 170.7, 169.6, 162.5, 153.4, 137.4, 130.7, 130.0, 128.8, 128.3, 126.8, 126.4, 126.3, 124.7, 101.1, 35.1, 31.4$  ppm; FT-IR (neat):  $\nu = 3334, 3162, 2952, 1666, 1626, 1430, 1389, 952, 839, 759$   $\text{cm}^{-1}$ ; HRMS (ESI),  $m/z$ :  $[\text{M} + \text{K}]^+$  calcd for  $\text{C}_{16}\text{H}_{11}\text{FKN}_2\text{O}_2^+$  359.1156; found 359.1163.

2-(3-(2-Bromophenyl)isoxazol-5-yl)benzamide (**18g**)

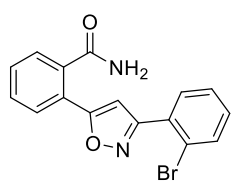

Yiel: 92%; white solid; m.p. 174–175 °C;  $R_f = 0.18$  (*n*-hexane/EtOAc 1:1 v/v);  $^1\text{H}$  NMR (500 MHz,  $\text{DMSO}-d_6$ ):  $\delta = 8.02$  (br s, 1H), 7.88 – 7.86 (m, 1H), 7.84 (dd,  $J = 8.0, 1.2$  Hz, 1H), 7.69 (dd,  $J = 7.6, 1.7$  Hz, 1H), 7.62 (br s, 1H), 7.61 – 7.58 (m, 2H), 7.58 – 7.51 (m, 2H), 7.48 (td,  $J = 7.7, 1.8$  Hz, 1H), 7.16 (s, 1H) ppm;  $^{13}\text{C}$  NMR (125 MHz,  $\text{DMSO}-d_6$ ):  $\delta = 170.8, 168.5, 162.7, 137.5, 134.1, 132.3, 131.8, 130.8, 130.3, 130.0, 128.7, 128.5, 128.2, 124.1, 122.0, 104.2$  ppm; FT-IR (neat):  $\nu = 3373, 3189, 1634, 1605, 1451, 1440, 1395, 952, 760$   $\text{cm}^{-1}$ ; HRMS (ESI),  $m/z$ :  $[\text{M} + \text{Na}]^+$  calcd for  $\text{C}_{16}\text{H}_{11}\text{BrN}_2\text{NaO}_2^+$  364.9896; found 364.9890.

2-(3-(2-(Trifluoromethyl)phenyl)isoxazol-5-yl)benzamide (**18h**)

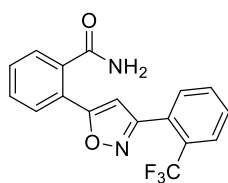

Yield: 89%; white solid; m.p. 153–154 °C;  $R_f = 0.18$  (*n*-hexane/EtOAc 1:1 v/v);  $^1\text{H}$  NMR (500 MHz,  $\text{DMSO}-d_6$ ):  $\delta = 8.02$  (br s, 1H), 7.96 (d,  $J = 7.8$  Hz, 1H), 7.90 – 7.82 (m, 2H), 7.78 (t,  $J = 7.6$  Hz, 1H), 7.73 (d,  $J = 7.5$  Hz, 1H), 7.64 – 7.57 (m, 3H), 7.54 – 7.51 (m, 1H), 7.00 (s, 1H) ppm;  $^{13}\text{C}$  NMR (125 MHz,  $\text{DMSO}-d_6$ ):  $\delta = 170.8, 168.8, 161.8, 137.5, 133.4, 132.3, 131.0, 130.9, 130.0, 128.6, 128.3, 128.0$  (q,  $J = 2.4$  Hz, 1C), 127.9 (q,  $J = 30.7$  Hz, 1C), 127.2 (q,  $J = 5.4$  Hz, 1C), 124.2 (q,  $J = 273.7$  Hz, 1C), 123.9, 104.2 (q,  $J = 2.0$  Hz, 1C) ppm;  $^{19}\text{F}$  NMR (470 MHz,  $\text{DMSO}-d_6$ )  $\delta = -56.86$  (s, 3F) ppm; FT-IR (neat):  $\nu = 3362, 3186, 1651, 1392, 1309, 1138, 1114, 954, 772$   $\text{cm}^{-1}$ ; HRMS (ESI),  $m/z$ :  $[\text{M} + \text{Na}]^+$  calcd for  $\text{C}_{17}\text{H}_{11}\text{F}_3\text{N}_2\text{NaO}_2^+$  355.0665; found 355.0669.

2-(3-(3-Nitrophenyl)isoxazol-5-yl)benzamide (**18i**)

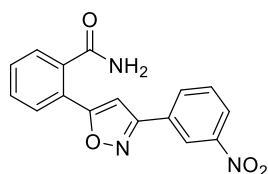

Yield: 83%; white solid; m.p. 247–248 °C;  $R_f$  = 0.31 (*n*-hexane/EtOAc 1:2 *v/v*);  $^1\text{H}$  NMR (500 MHz, DMSO- $d_6$ ):  $\delta$  = 8.66 (br s, 1H), 8.37 (t,  $J$  = 7.8 Hz, 2H), 8.02 (br s, 1H), 7.89 – 7.80 (m, 2H), 7.64 – 7.56 (m, 4H), 7.48 (s, 1H) ppm;  $^{13}\text{C}$  NMR (125 MHz, DMSO- $d_6$ ):  $\delta$  = 170.7, 170.5, 161.1, 148.9, 137.5, 133.3, 131.5, 131.0, 130.6, 130.2, 129.1, 128.4, 125.4, 124.5, 121.5, 101.4 ppm; FT-IR (neat):  $\nu$  = 3353, 3171, 2363, 2342, 1660, 1542, 1347, 809, 763, 745  $\text{cm}^{-1}$ ; HRMS (ESI),  $m/z$ :  $[\text{M} + \text{Na}]^+$  calcd for  $\text{C}_{16}\text{H}_{11}\text{N}_3\text{NaO}_4^+$  332.0642; found 332.0652.

2-(3-Mesitylisoxazol-5-yl)benzamide (**18j**)

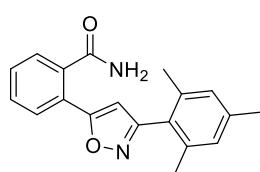

Yield: 90%; white solid; m.p. 177–178 °C;  $R_f$  = 0.28 (*n*-hexane/EtOAc 1:1 *v/v*);  $^1\text{H}$  NMR (500 MHz,  $\text{CDCl}_3$ ):  $\delta$  = 7.86 (dd,  $J$  = 7.6, 1.7 Hz, 1H), 7.55 (td,  $J$  = 7.8, 1.4 Hz, 2H), 7.49 (td,  $J$  = 7.7, 7.2, 1.3 Hz, 1H), 6.94 (s, 2H), 6.58 (s, 1H), 6.16 (br s, 1H), 5.94 (br s, 1H), 2.32 (s, 3H), 2.17 (s, 6H) ppm;  $^{13}\text{C}$  NMR (125 MHz,  $\text{CDCl}_3$ ):  $\delta$  = 171.2, 167.4, 162.7, 138.9, 137.2, 135.0, 130.3, 130.1, 128.7, 128.4, 127.8, 125.9, 124.9, 104.8, 21.2, 20.3 ppm; FT-IR (neat):  $\nu$  = 3348, 3179, 1658, 1581, 1571, 1487, 1377, 841, 774  $\text{cm}^{-1}$ ; HRMS (ESI),  $m/z$ :  $[\text{M} + \text{Na}]^+$  calcd for  $\text{C}_{19}\text{H}_{18}\text{N}_2\text{NaO}_2^+$  329.1260; found 329.1253.

2-(3-(Perfluorophenyl)isoxazol-5-yl)benzamide (**18k**)

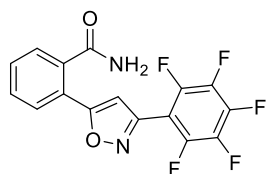

Yield: 84%; white solid; m.p. 218–219 °C;  $R_f$  = 0.28 (*n*-hexane/EtOAc 1:1 *v/v*);  $^1\text{H}$  NMR (500 MHz, DMSO- $d_6$ ):  $\delta$  = 8.05 (br s, 1H), 7.89 – 7.85 (m, 1H), 7.64 (br s, 1H), 7.63 – 7.60 (m, 2H), 7.59 – 7.55 (m, 1H), 7.16 (s, 1H) ppm;  $^{13}\text{C}$  NMR (125 MHz, DMSO- $d_6$ ):  $\delta$  = 170.6, 170.0, 152.0, 137.5, 131.2, 130.2, 128.9, 128.4, 123.7, 104.1 (t,  $J$  = 3.3 Hz, 1C) ppm;  $^{19}\text{F}$  NMR (470 MHz, DMSO- $d_6$ )  $\delta$  = –139.21 (dd,  $J$  = 22.7, 6.7 Hz, 2F), –151.85 (t,  $J$  = 22.2 Hz, 1F), –161.56 (td,  $J$  = 21.7, 5.6 Hz, 2F) ppm; FT-IR (neat):  $\nu$  = 3359, 3176, 1653, 1534, 1506, 1400, 1092, 997, 815, 764  $\text{cm}^{-1}$ ; HRMS (ESI),  $m/z$ :  $[\text{M} + \text{Na}]^+$  calcd for  $\text{C}_{16}\text{H}_7\text{F}_5\text{N}_2\text{NaO}_2^+$  377.0320; found 377.0329.

2-(3-(2,6-Dichlorophenyl)isoxazol-5-yl)benzamide (**18l**)

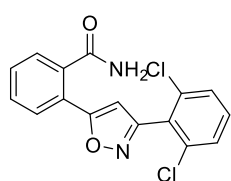

Yield: 93%; white solid; m.p. 197–198 °C;  $R_f$  = 0.34 (*n*-hexane/EtOAc 2:3 *v/v*);  $^1\text{H}$  NMR (500 MHz, DMSO- $d_6$ ):  $\delta$  = 8.02 (br s, 1H), 7.91 – 7.87 (m, 1H), 7.67 (d,  $J$  = 7.8 Hz, 2H), 7.63 – 7.57 (m, 4H), 7.54 – 7.51 (m, 1H), 6.97 (s, 1H) ppm;  $^{13}\text{C}$  NMR (125 MHz, DMSO- $d_6$ ):  $\delta$  = 170.8, 169.2, 159.3, 137.5, 134.9, 132.9, 130.9, 130.0, 129.2, 128.5, 128.3, 128.1, 123.8, 104.5 ppm; FT-IR (neat):  $\nu$  = 3356, 3169, 1648, 1625, 1433, 1406, 1384, 1193, 1124, 780  $\text{cm}^{-1}$ ; HRMS (ESI),  $m/z$ :  $[\text{M} + \text{K}]^+$  calcd for  $\text{C}_{16}\text{H}_{10}\text{Cl}_2\text{KN}_2\text{O}_2^+$  370.9751; found 370.9759.

### 2-(3-(5-Chlorofuran-2-yl)isoxazol-5-yl)benzamide (**18m**)

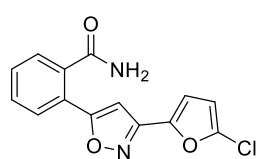

Yield: 80%; white solid; m.p. 172–173 °C;  $R_f$  = 0.4 (*n*-hexane/EtOAc 1:2 *v/v*);

$^1\text{H}$  NMR (500 MHz, DMSO- $d_6$ ):  $\delta$  = 8.00 (br s, 1H), 7.82 – 7.78 (m, 1H), 7.62 – 7.57 (m, 3H), 7.56 – 7.52 (m, 1H), 7.26 (d,  $J$  = 3.5 Hz, 1H), 7.09 (s, 1H), 6.76 (d,  $J$  = 3.5 Hz, 1H) ppm;  $^{13}\text{C}$  NMR (125 MHz, DMSO- $d_6$ ):  $\delta$  = 170.6, 169.7,

154.2, 143.8, 137.7, 137.5, 131.0, 130.1, 128.9, 128.4, 124.1, 114.3, 109.9, 100.3 ppm; FT-IR (neat):  $\nu$  = 3380, 3187, 1645, 1620, 1522, 1429, 1397, 1205, 1014, 766  $\text{cm}^{-1}$ ; HRMS (ESI),  $m/z$ :  $[\text{M} + \text{Na}]^+$  calcd for  $\text{C}_{14}\text{H}_9\text{ClN}_2\text{NaO}_3^+$  311.0194; found 311.0199.

### 2-(3-(Thiophen-2-yl)isoxazol-5-yl)benzamide (**18n**)

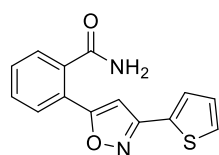

Yield: 79%; white solid; m.p. 171.5–172.5 °C;  $R_f$  = 0.34 (*n*-hexane/EtOAc 1:2 *v/v*);

$^1\text{H}$  NMR (500 MHz, DMSO- $d_6$ ):  $\delta$  = 8.00 (br s, 1H), 7.81 – 7.77 (m, 1H), 7.76 (d,  $J$  = 4.9 Hz, 1H), 7.71 (d,  $J$  = 3.4 Hz, 1H), 7.64 – 7.53 (m, 4H), 7.24 (dd,  $J$  = 5.1, 3.6 Hz, 1H), 7.19 (s, 1H) ppm;  $^{13}\text{C}$  NMR (125 MHz, DMSO- $d_6$ ):  $\delta$  = 170.6, 169.7, 158.1,

137.5, 130.9, 130.4, 130.1, 129.2, 129.0, 128.7, 128.4, 124.5, 101.1 ppm; FT-IR (neat):  $\nu$  = 3370, 3200, 1625, 1602, 1582, 1428, 1394, 914, 762, 706  $\text{cm}^{-1}$ ; HRMS (ESI),  $m/z$ :  $[\text{M} + \text{Na}]^+$  calcd for  $\text{C}_{14}\text{H}_{10}\text{N}_2\text{NaO}_2\text{S}^+$  293.0355; found 293.0354.

### 2-(3-Heptylisoxazol-5-yl)benzamide (**18o**)

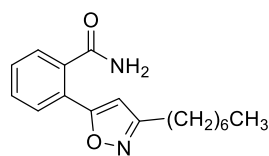

Yield: 92%; white solid; m.p. 105–106 °C;  $R_f$  = 0.46 (*n*-hexane/EtOAc 2:3 *v/v*);

$^1\text{H}$  NMR (500 MHz, DMSO- $d_6$ ):  $\delta$  = 7.93 (br s, 1H), 7.77 – 7.73 (m, 1H), 7.58 – 7.51 (m, 3H), 7.49 – 7.45 (m, 1H), 6.64 (s, 1H), 2.64 (t,  $J$  = 7.6 Hz, 2H), 1.63 (p,  $J$  = 7.3 Hz, 2H), 1.37 – 1.21 (m, 8H), 0.86 (t,  $J$  = 6.8 Hz, 3H) ppm;  $^{13}\text{C}$  NMR

(125 MHz, DMSO- $d_6$ ):  $\delta$  = 170.9, 168.1, 164.5, 137.4, 130.4, 129.8, 128.5, 128.1, 124.6, 102.7, 31.7, 29.0, 28.9, 28.2, 25.8, 22.6, 14.4 ppm; FT-IR (neat):  $\nu$  = 3363, 3182, 2920, 2850, 1652, 1602, 1463, 1396, 797, 767  $\text{cm}^{-1}$ ; HRMS (ESI),  $m/z$ :  $[\text{M} + \text{Na}]^+$  calcd for  $\text{C}_{17}\text{H}_{22}\text{N}_2\text{NaO}_2^+$  309.1573; found 309.1563.

## 7. Data for compounds **22**

### 2-(4-Iodo-5-phenylisoxazol-3-yl)benzamide (**22a**)

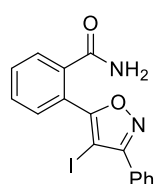

Yield: 97%; white solid; m.p. 177.5–179 °C;  $R_f$  = 0.2 (*n*-hexane/EtOAc 1:1 *v/v*);  $^1\text{H}$  NMR (500 MHz, DMSO- $d_6$ ):  $\delta$  = 8.02 (br s, 1H), 7.81 – 7.78 (m, 2H), 7.76 – 7.73 (m, 1H), 7.71 – 7.64 (m, 3H), 7.62 – 7.56 (m, 3H), 7.46 (br s, 1H) ppm;  $^{13}\text{C}$  NMR (125 MHz, DMSO- $d_6$ ):  $\delta$  = 171.9, 169.3, 163.4, 137.9, 131.3, 131.2, 130.7, 130.6, 129.3, 129.1, 128.9,

128.8, 126.2, 61.3 ppm; FT-IR (neat):  $\nu$  = 3466, 3144, 1673, 1604, 1379, 982, 766, 699, 515  $\text{cm}^{-1}$ ; HRMS (ESI),  $m/z$ :  $[\text{M} + \text{Na}]^+$  calcd for  $\text{C}_{16}\text{H}_{11}\text{N}_2\text{NaO}_2^+$  412.9757; found 412.9750.

2-(4-Iodo-5-(*p*-tolyl)isoxazol-3-yl)benzamide (**22b**)

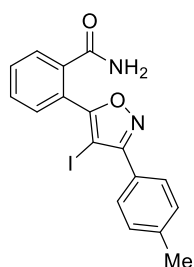

Yield: 99%; white solid; m.p. 184–185 °C;  $R_f$  = 0.44 (*n*-hexane/EtOAc 1:2 *v/v*);  $^1\text{H}$  NMR (500 MHz,  $\text{CDCl}_3$ ):  $\delta$  = 7.78 – 7.71 (m, 3H), 7.65 (d,  $J$  = 6.9 Hz, 1H), 7.58 (dtd,  $J$  = 17.0, 7.4, 1.6 Hz, 2H), 7.30 (d,  $J$  = 7.8 Hz, 2H), 6.13 (br s, 1H), 5.93 (br s, 1H), 2.42 (s, 3H) ppm;  $^{13}\text{C}$  NMR (125 MHz,  $\text{CDCl}_3$ ):  $\delta$  = 170.3, 169.6, 163.4, 140.3, 136.1, 131.04, 130.9, 130.6, 129.2, 128.6, 128.5, 125.7, 125.4, 59.7, 21.4 ppm; FT-IR (neat):  $\nu$  = 3468, 3153, 1678, 1604, 1379, 1110, 982, 820, 767, 495  $\text{cm}^{-1}$ ; HRMS (ESI),  $m/z$ :  $[\text{M} + \text{Na}]^+$  calcd for  $\text{C}_{17}\text{H}_{13}\text{N}_2\text{NaO}_2^+$  426.9914; found 426.9907.

2-(4-Iodo-5-(3-iodo-4-methoxyphenyl)isoxazol-3-yl)benzamide (**22c**)

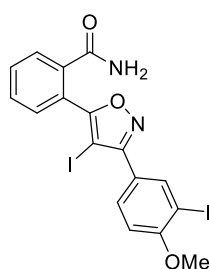

Yield: 88%; white solid; m.p. 195–196 °C;  $R_f$  = 0.31 (*n*-hexane/EtOAc 1:1 *v/v*);  $^1\text{H}$  NMR (500 MHz,  $\text{DMSO}-d_6$ ):  $\delta$  = 8.18 (d,  $J$  = 2.2 Hz, 1H), 8.02 (br s, 1H), 7.84 (dd,  $J$  = 8.5, 2.2 Hz, 1H), 7.76 – 7.71 (m, 1H), 7.68 – 7.63 (m, 3H), 7.46 (br s, 1H), 7.21 (d,  $J$  = 8.6 Hz, 1H), 3.92 (s, 3H) ppm;  $^{13}\text{C}$  NMR (125 MHz,  $\text{DMSO}-d_6$ ):  $\delta$  = 172.0, 169.3, 161.6, 159.7, 139.1, 137.9, 131.4, 131.2, 130.6, 130.5, 128.8, 126.2, 123.1, 112.2, 86.7, 61.3, 57.2 ppm; FT-IR (neat):  $\nu$  = 34061, 3208, 2930, 1652, 1600, 1397, 1274, 1258, 1046, 987, 728  $\text{cm}^{-1}$ ; HRMS (ESI),  $m/z$ :  $[\text{M} + \text{Na}]^+$  calcd for  $\text{C}_{17}\text{H}_{12}\text{I}_2\text{N}_2\text{NaO}_3^+$  568.8829; found 568.8840.

2-(4-Iodo-5-(4-(trifluoromethyl)phenyl)isoxazol-3-yl)benzamide (**22d**)

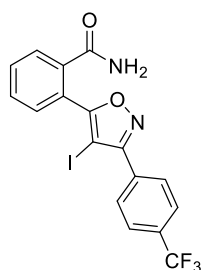

Yield: 99%; white solid; m.p. 174–175 °C;  $R_f$  = 0.46 (*n*-hexane/EtOAc 1:2 *v/v*);  $^1\text{H}$  NMR (500 MHz,  $\text{DMSO}-d_6$ ):  $\delta$  = 8.07 – 8.02 (m, 3H), 7.98 (d,  $J$  = 8.2 Hz, 2H), 7.78 – 7.74 (m, 1H), 7.71 – 7.64 (m, 3H), 7.48 (br s, 1H) ppm;  $^{13}\text{C}$  NMR (125 MHz,  $\text{DMSO}-d_6$ ):  $\delta$  = 172.5, 169.2, 162.5, 137.9, 133.1, 131.4, 131.3, 130.9 (q,  $J$  = 32.3 Hz, 1C), 130.7, 129.9, 128.8, 126.3 (q,  $J$  = 3.6 Hz, 1C), 126.0, 124.5 (q,  $J$  = 272.4 Hz, 1C), 61.3 ppm;  $^{19}\text{F}$  NMR (470 MHz,  $\text{DMSO}-d_6$ )  $\delta$  = –61.36 (s, 3F) ppm; FT-IR (neat):  $\nu$  = 3469, 3279, 3167, 1675, 1640, 1600, 1319, 1127, 1110, 1067, 766  $\text{cm}^{-1}$ ; HRMS (ESI),  $m/z$ :  $[\text{M} + \text{H}]^+$  calcd for  $\text{C}_{17}\text{H}_{11}\text{F}_3\text{N}_2\text{O}_2^+$  458.9812; found 458.9821.

2-(5-(4-Fluorophenyl)-4-iodoisoxazol-3-yl)benzamide (**22e**)

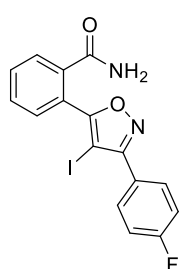

Yield: 97%; white solid; m.p. 151–152 °C;  $R_f$  = 0.48 (*n*-hexane/EtOAc 1:2 v/v);  $^1\text{H}$  NMR (500 MHz, DMSO- $d_6$ ):  $\delta$  = 8.03 (br s, 1H), 7.88 – 7.84 (m, 2H), 7.76 – 7.72 (m, 1H), 7.70 – 7.64 (m, 3H), 7.49 – 7.41 (m, 3H) ppm;  $^{13}\text{C}$  NMR (125 MHz, DMSO- $d_6$ ):  $\delta$  = 172.0, 169.2, 163.6 (d,  $J$  = 247.9 Hz, 1C), 162.6, 137.9, 131.3 (2C), 131.2, 131.2, 130.5, 128.7, 126.1, 125.5 (d,  $J$  = 3.3 Hz, 1C), 116.4 (d,  $J$  = 21.9 Hz, 1C), 61.3 ppm;  $^{19}\text{F}$  NMR (470 MHz, DMSO- $d_6$ )  $\delta$  = –110.57 (tt,  $J$  = 9.2, 5.2 Hz, 1F) ppm; FT-IR (neat):  $\nu$  = 3359, 3151, 1678, 1604, 1482, 1399, 1216, 986, 841, 766  $\text{cm}^{-1}$ ; HRMS (ESI),  $m/z$ :

$[\text{M} + \text{Na}]^+$  calcd for  $\text{C}_{16}\text{H}_{10}\text{FIN}_2\text{NaO}_2^+$  430.9663; found 430.9669.

2-(5-(4-(tert-Butyl)phenyl)-4-iodoisoxazol-3-yl)benzamide (**22f**)

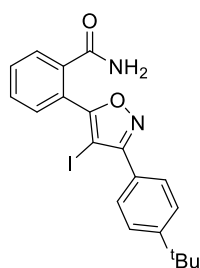

Yield: 97%; white solid; m.p. 215–216 °C;  $R_f$  = 0.58 (*n*-hexane/EtOAc 1:2 v/v);  $^1\text{H}$  NMR (500 MHz, DMSO- $d_6$ ):  $\delta$  = 8.02 (br s, 1H), 7.75 – 7.72 (m, 3H), 7.70 – 7.63 (m, 3H), 7.61 (d,  $J$  = 8.3 Hz, 2H), 7.47 (br s, 1H), 1.34 (s, 9H) ppm;  $^{13}\text{C}$  NMR (125 MHz, DMSO- $d_6$ ):  $\delta$  = 171.7, 169.3, 163.2, 153.27, 137.9, 131.3, 131.1, 130.5, 128.7, 126.2, 126.2, 126.1, 61.2, 35.1, 31.5 ppm; FT-IR (neat):  $\nu$  = 3417, 3198, 2961, 1671, 1611, 1590, 1375, 984, 842, 767  $\text{cm}^{-1}$ ; HRMS (ESI),  $m/z$ :  $[\text{M} + \text{Na}]^+$  calcd for

$\text{C}_{20}\text{H}_{19}\text{IN}_2\text{NaO}_2^+$  469.0383; found 469.0392.

2-(5-(2-Bromophenyl)-4-iodoisoxazol-3-yl)benzamide (**22g**)

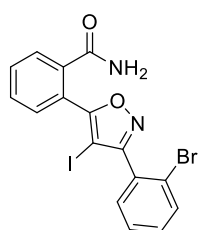

Yield: 99%; white solid; m.p. 224–225 °C;  $R_f$  = 0.34 (*n*-hexane/EtOAc 1:2 v/v);  $^1\text{H}$  NMR (500 MHz, DMSO- $d_6$ ):  $\delta$  = 7.99 (br s, 1H), 7.85 (d,  $J$  = 7.8 Hz, 1H), 7.75 – 7.71 (m, 1H), 7.71 – 7.63 (m, 3H), 7.58 (t,  $J$  = 7.4 Hz, 1H), 7.52 (td,  $J$  = 7.7, 1.9 Hz, 1H), 7.49 (br s, 1H), 7.45 (dd,  $J$  = 7.4, 1.9 Hz, 1H) ppm;  $^{13}\text{C}$  NMR (125 MHz, DMSO- $d_6$ ):  $\delta$  = 170.8, 169.3, 165.6, 138.0, 133.4, 132.5, 132.3, 131.2, 131.0, 130.7, 130.5, 128.8, 128.4, 125.7, 123.2, 64.1 ppm; FT-IR (neat):  $\nu$  = 3470, 3313, 3175, 1682,

1662, 1599, 1473, 1379, 982, 760  $\text{cm}^{-1}$ ; HRMS (ESI),  $m/z$ :  $[\text{M} + \text{Na}]^+$  calcd for  $\text{C}_{16}\text{H}_{10}\text{BrIN}_2\text{NaO}_2^+$  490.8863; found 490.8860.

2-(4-Iodo-5-(2-(trifluoromethyl)phenyl)isoxazol-3-yl)benzamide (**22h**)

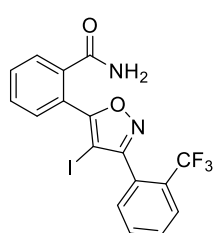

Yield: 99%; white solid; m.p. 190–191 °C;  $R_f$  = 0.37 (*n*-hexane/EtOAc 1:2 v/v);  $^1\text{H}$  NMR (500 MHz, DMSO- $d_6$ ):  $\delta$  = 8.00 – 7.95 (m, 2H), 7.88 (t,  $J$  = 7.5 Hz, 1H), 7.81 (t,  $J$  = 7.7 Hz, 1H), 7.75 – 7.72 (m, 1H), 7.70 – 7.65 (m, 3H), 7.54 (d,  $J$  = 7.7 Hz, 1H), 7.50 (br s, 1H) ppm;  $^{13}\text{C}$  NMR (125 MHz, DMSO- $d_6$ ):  $\delta$  = 170.7, 169.3, 164.2, 138.0, 133.1, 132.6, 131.2, 131.2, 131.0, 130.5, 128.9 (d,  $J$  = 30.6 Hz, 1C), 128.8, 127.8 (q,  $J$  = 1.7 Hz, 1C), 127.2 (q,  $J$  = 4.8 Hz, 1C), 125.7, 124.0 (q,  $J$  = 274.1 Hz,

1C), 64.1 ppm;  $^{19}\text{F}$  NMR (470 MHz, DMSO- $d_6$ )  $\delta$  = –57.17 (s, 3F) ppm; FT-IR (neat):  $\nu$  = 3440, 3115,

1681, 1656, 1610, 1396, 1316, 1174, 1127, 1032, 766  $\text{cm}^{-1}$ ; HRMS (ESI),  $m/z$ :  $[\text{M} + \text{Na}]^+$  calcd for  $\text{C}_{17}\text{H}_{10}\text{F}_3\text{IN}_2\text{NaO}_2^+$  480.9631; found 480.9627.

2-(4-Iodo-5-(3-nitrophenyl)isoxazol-3-yl)benzamide (**22i**)

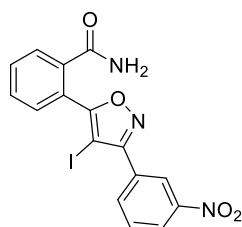

Yield: 99%; white solid; m.p. 222–223  $^{\circ}\text{C}$ ;  $R_f$  = 0.46 (*n*-hexane/EtOAc 1:2 v/v);  $^1\text{H}$  NMR (500 MHz,  $\text{DMSO}-d_6$ ):  $\delta$  = 8.65 (t,  $J$  = 2.0 Hz, 1H), 8.45 (ddd,  $J$  = 8.3, 2.4, 1.1 Hz, 1H), 8.28 (dt,  $J$  = 7.7, 1.2 Hz, 1H), 8.05 (br s, 1H), 7.92 (t,  $J$  = 8.0 Hz, 1H), 7.79 – 7.75 (m, 1H), 7.72 – 7.66 (m, 3H), 7.48 (br s, 1H) ppm;  $^{13}\text{C}$  NMR (125 MHz,  $\text{DMSO}-d_6$ ):  $\delta$  = 172.7, 169.1, 161.6, 148.3, 137.8, 135.2, 131.3, 131.3, 131.3, 130.6, 130.5, 128.8, 125.9, 125.5, 123.3, 61.3 ppm; FT-IR (neat):  $\nu$  = 3458, 3297, 3176, 1660, 1603, 1525, 1386, 1347, 997, 765  $\text{cm}^{-1}$ ; HRMS (ESI),  $m/z$ :  $[\text{M} + \text{Na}]^+$  calcd for  $\text{C}_{16}\text{H}_{10}\text{IN}_3\text{NaO}_4^+$  457.9608; found 457.9603.

2-(4-Iodo-5-(perfluorophenyl)isoxazol-3-yl)benzamide (**22k**)

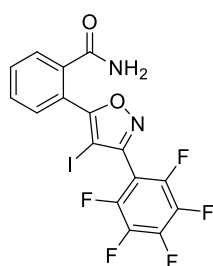

Yield: 99%; white solid; m.p. 178–179  $^{\circ}\text{C}$ ;  $R_f$  = 0.5 (*n*-hexane/EtOAc 1:2 v/v);  $^1\text{H}$  NMR (500 MHz,  $\text{DMSO}-d_6$ ):  $\delta$  = 8.07 (br s, 1H), 7.79 – 7.75 (m, 1H), 7.73 – 7.67 (m, 3H), 7.53 (br s, 1H) ppm;  $^{13}\text{C}$  NMR (125 MHz,  $\text{DMSO}-d_6$ ):  $\delta$  = 172.8, 169.1, 155.4, 137.8, 131.5, 131.2, 130.7, 128.8, 125.3, 63.9 ppm;  $^{19}\text{F}$  NMR (470 MHz,  $\text{DMSO}-d_6$ )  $\delta$  = –138.55 – –138.65 (m, 2F), –149.48 (t,  $J$  = 22.4 Hz, 1F), –160.55 – –160.71 (m, 2F) ppm; FT-IR (neat):  $\nu$  = 3476, 3200, 1673, 1506, 1494, 1372, 1126, 1021, 990  $\text{cm}^{-1}$ ; HRMS (ESI),  $m/z$ :  $[\text{M} + \text{Na}]^+$  calcd for  $\text{C}_{16}\text{H}_6\text{F}_5\text{IN}_2\text{NaO}_2^+$  502.9286; found 502.9271.

2-(5-(2,6-Dichlorophenyl)-4-iodoisoxazol-3-yl)benzamide (**22l**)

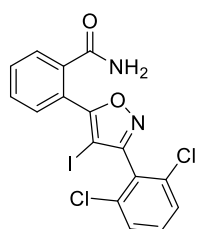

Yield: 98%; white solid; m.p. 264–265  $^{\circ}\text{C}$ ;  $R_f$  = 0.48 (*n*-hexane/EtOAc 1:2 v/v);  $^1\text{H}$  NMR (500 MHz,  $\text{DMSO}-d_6$ ):  $\delta$  = 7.98 (br s, 1H), 7.76 – 7.61 (m, 7H), 7.51 (br s, 1H) ppm;  $^{13}\text{C}$  NMR (125 MHz,  $\text{DMSO}-d_6$ ):  $\delta$  = 171.4, 169.3, 162.9, 138.0, 135.3, 133.4, 131.3, 130.9, 130.5, 129.0, 128.8, 127.9, 125.5, 63.8 ppm; FT-IR (neat):  $\nu$  = 3432, 3111, 1680, 1661, 1605, 1429, 1369, 1193, 1112, 985  $\text{cm}^{-1}$ ; HRMS (ESI),  $m/z$ :  $[\text{M} + \text{Na}]^+$  calcd for  $\text{C}_{16}\text{H}_9\text{Cl}_2\text{IN}_2\text{NaO}_2^+$  480.8978; found 480.8977.

### 2-(5-Heptyl-4-iodoisoxazol-3-yl)benzamide (**22o**)

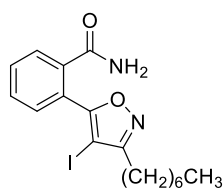

Yield: 98%; white solid; m.p. 84–85 °C;  $R_f$  = 0.54 (*n*-hexane/EtOAc 1:2 v/v);  $^1\text{H}$  NMR (500 MHz,  $\text{CDCl}_3$ ):  $\delta$  = 7.79 – 7.73 (m, 1H), 7.62 – 7.54 (m, 3H), 5.85 (br s, 1H), 5.76 (br s, 1H), 2.67 (t,  $J$  = 7.5 Hz, 2H), 1.76 (p,  $J$  = 7.6 Hz, 2H), 1.46 – 1.26 (m, 8H), 0.89 (t,  $J$  = 6.7 Hz, 3H) ppm;  $^{13}\text{C}$  NMR (125 MHz,  $\text{CDCl}_3$ ):  $\delta$  = 169.5, 168.8, 165.3, 135.9, 130.7, 130.6, 128.6, 125.6, 61.4, 31.7, 28.9, 27.2, 26.9, 22.6, 14.1 ppm; FT-IR (neat):  $\nu$  = 3306, 3140, 2926, 2855, 1687, 1667, 1607, 1385, 1047  $\text{cm}^{-1}$ ; HRMS (ESI),  $m/z$ :  $[\text{M} + \text{Na}]^+$  calcd for  $\text{C}_{17}\text{H}_{21}\text{IN}_2\text{NaO}_2^+$  435.0540; found 435.0550.

## 8. Data for compounds **23**

### 3-Phenylisoxazolo[4,5-*c*]isoquinolin-5(4*H*)-one (**23a**)

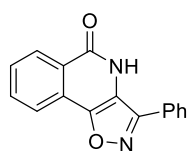

Yield: 78%; white solid; m.p. >250 °C (decomposed);  $R_f$  = 0.46 (DCM/acetone 8:1 v/v);  $^1\text{H}$  NMR (500 MHz,  $\text{DMSO}-d_6$ ):  $\delta$  = 11.88 (br s, 1H), 8.35 (dd,  $J$  = 8.2, 2.4 Hz, 1H), 8.13 – 8.07 (m, 1H), 7.99 – 7.88 (m, 3H), 7.76 (td,  $J$  = 7.6, 2.3 Hz, 1H), 7.61 – 7.54 (m, 3H) ppm;  $^{13}\text{C}$  NMR (125 MHz,  $\text{DMSO}-d_6$ ):  $\delta$  = 162.1, 152.7, 150.1, 138.2, 134.0, 130.9, 130.5, 130.0, 129.4, 129.1, 128.6, 127.0, 125.1, 121.3 ppm; FT-IR (neat):  $\nu$  = 3441, 2924, 1664, 1598, 1346, 769, 689  $\text{cm}^{-1}$ ; HRMS (ESI),  $m/z$ :  $[\text{M} + \text{Na}]^+$  calcd for  $\text{C}_{16}\text{H}_{10}\text{N}_2\text{NaO}_2^+$  285.0634; found 285.0639

### 3-(*p*-Tolyl)isoxazolo[4,5-*c*]isoquinolin-5(4*H*)-one (**23b**)

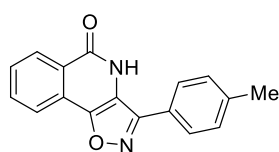

Yield: 67%; white solid; m.p. >250 °C (decomposed);  $R_f$  = 0.64 (*n*-hexane/EtOAc 1:1 v/v);  $^1\text{H}$  NMR (500 MHz, 4% TFA-*d* in  $\text{CDCl}_3$ ):  $\delta$  = 8.55 (d,  $J$  = 8.1 Hz, 1H), 8.19 (d,  $J$  = 7.9 Hz, 1H), 7.99 (t,  $J$  = 7.6 Hz, 1H), 7.82 – 7.73 (m, 3H), 7.40 (d,  $J$  = 7.6 Hz, 2H), 2.47 (s, 3H) ppm;  $^{13}\text{C}$  NMR (125 MHz, 4% TFA-*d* in  $\text{CDCl}_3$ ):  $\delta$  = 164.4, 152.5, 151.4, 141.7, 134.9, 130.3, 130.2, 129.4, 127.6, 125.7, 124.0, 122.8, 121.5, 117.4, 21.5 ppm; FT-IR (neat):  $\nu$  = 3094, 2982, 1646, 1596, 1481, 1339, 821, 766, 725  $\text{cm}^{-1}$ ; HRMS (ESI),  $m/z$ :  $[\text{M} + \text{K}]^+$  calcd for  $\text{C}_{17}\text{H}_{12}\text{KN}_2\text{O}_2^+$  315.0530; found 315.0533.

### 3-(3-Iodo-4-methoxyphenyl)isoxazolo[4,5-*c*]isoquinolin-5(4*H*)-one (**23c**)

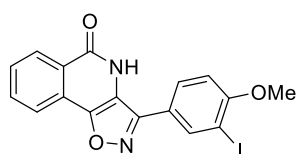

Yield: 93%; white solid; m.p. >260 °C (decomposed);  $R_f$  = 0.4 (*n*-hexane/EtOAc 1:1 v/v);  $^1\text{H}$  NMR (500 MHz, 4% TFA-*d* in  $\text{CDCl}_3$ ):  $\delta$  = 8.56 (d,  $J$  = 8.2 Hz, 1H), 8.26 (d,  $J$  = 2.1 Hz, 1H), 8.21 (d,  $J$  = 8.0 Hz, 1H), 8.01 (t,  $J$  = 7.6 Hz, 1H), 7.86 – 7.78 (m, 2H), 7.01 (d,  $J$  = 8.5 Hz, 1H), 3.99 (s, 3H) ppm;  $^{13}\text{C}$  NMR (125 MHz, 4% TFA-*d* in  $\text{CDCl}_3$ ):  $\delta$  = 164.5, 160.5, 151.6, 151.0, 138.5, 135.0, 130.4, 129.4, 125.6, 121.6, 119.7, 117.2, 111.2, 87.1, 56.6 ppm; FT-IR (neat):  $\nu$  = 3086, 2845, 1652,

1599, 1480, 1393, 1197, 1154, 1044, 779  $\text{cm}^{-1}$ ; HRMS (ESI),  $m/z$ :  $[\text{M} + \text{Na}]^+$  calcd for  $\text{C}_{17}\text{H}_{11}\text{N}_2\text{NaO}_3^+$  440.9707; found 440.9716.

### 3-(4-(Trifluoromethyl)phenyl)isoxazolo[4,5-*c*]isoquinolin-5(4*H*)-one (**23d**)

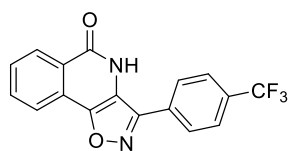

Yield: 81%; white solid; m.p.  $>255\text{ }^{\circ}\text{C}$  (decomposed);  $R_f = 0.51$  (*n*-hexane/EtOAc 2:1 *v/v*);  $^1\text{H}$  NMR (500 MHz, 4% TFA-*d* in  $\text{CDCl}_3$ ):  $\delta = 8.57$  (d,  $J = 8.1$  Hz, 1H), 8.24 (d,  $J = 7.9$  Hz, 1H), 8.06 – 7.99 (m, 3H), 7.90 – 7.82 (m, 3H) ppm;  $^{13}\text{C}$  NMR (125 MHz, 4% TFA-*d* in  $\text{CDCl}_3$ ):  $\delta = 164.6$ , 152.2, 151.4, 135.2, 133.3 (q,  $J = 33.0$  Hz, 1C), 130.7, 129.5, 129.1, 128.3, 126.6 (q,  $J = 3.7$  Hz, 1C), 125.4, 124.0, 123.6 (q,  $J = 272.5$  Hz, 1C), 121.7, 117.3 ppm;  $^{19}\text{F}$  NMR (470 MHz, 4% TFA-*d* in  $\text{CDCl}_3$ )  $\delta = -63.18$  (s, 3F) ppm; FT-IR (neat):  $\nu = 3086$ , 1652, 1598, 1327, 1198, 1134, 1111, 1070, 841, 770  $\text{cm}^{-1}$ ; HRMS (ESI),  $m/z$ :  $[\text{M} + \text{Na}]^+$  calcd for  $\text{C}_{17}\text{H}_9\text{F}_3\text{N}_2\text{NaO}_2^+$  353.0508; found 353.0517.

### 3-(4-Fluorophenyl)isoxazolo[4,5-*c*]isoquinolin-5(4*H*)-one (**23e**)

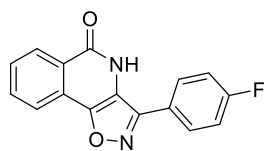

Yield: 89%; white solid; m.p.  $>270\text{ }^{\circ}\text{C}$  (decomposed);  $R_f = 0.66$  (*n*-hexane/EtOAc 1:1 *v/v*);  $^1\text{H}$  NMR (500 MHz, 4% TFA-*d* in  $\text{CDCl}_3$ ):  $\delta = 8.56$  (d,  $J = 8.1$  Hz, 1H), 8.23 (d,  $J = 8.0$  Hz, 1H), 8.02 (t,  $J = 7.6$  Hz, 1H), 7.90 – 7.81 (m, 3H), 7.31 (t,  $J = 8.5$  Hz, 2H) ppm;  $^{13}\text{C}$  NMR (125 MHz, 4% TFA-*d* in  $\text{CDCl}_3$ ):  $\delta = 164.7$  (d,  $J = 253.1$  Hz, 1C), 164.6, 151.8, 151.8, 135.2, 130.6, 130.0 (d,  $J = 8.7$  Hz, 1C), 129.5, 125.5, 124.1, 121.7, 121.5 (d,  $J = 3.4$  Hz, 1C), 117.3, 117.0 (d,  $J = 22.0$  Hz, 1C) ppm;  $^{19}\text{F}$  NMR (470 MHz, 4% TFA-*d* in  $\text{CDCl}_3$ )  $\delta = -107.45$  (tt,  $J = 8.9$ , 5.0 Hz, 1F) ppm; FT-IR (neat):  $\nu = 3090$ , 2981, 1662, 1600, 1485, 1420, 1344, 1235, 828, 760  $\text{cm}^{-1}$ ; HRMS (ESI),  $m/z$ :  $[\text{M} + \text{Na}]^+$  calcd for  $\text{C}_{16}\text{H}_9\text{FN}_2\text{NaO}_2^+$  303.0540; found 303.0533.

### 3-(4-(*tert*-Butyl)phenyl)isoxazolo[4,5-*c*]isoquinolin-5(4*H*)-one (**23f**)

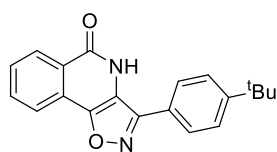

Yield: 78%; white solid; m.p.  $>265\text{ }^{\circ}\text{C}$  (decomposed);  $R_f = 0.44$  (*n*-hexane/EtOAc 2:1 *v/v*);  $^1\text{H}$  NMR (500 MHz, 4% TFA-*d* in  $\text{CDCl}_3$ ):  $\delta = 8.57$  (d,  $J = 8.2$  Hz, 1H), 8.22 (d,  $J = 8.0$  Hz, 1H), 8.00 (t,  $J = 7.6$  Hz, 1H), 7.80 (t,  $J = 7.3$  Hz, 3H), 7.64 (d,  $J = 7.9$  Hz, 2H), 1.40 (s, 9H) ppm;  $^{13}\text{C}$  NMR (125 MHz, 4% TFA-*d* in  $\text{CDCl}_3$ ):  $\delta = 164.4$ , 154.8, 152.5, 151.4, 134.9, 130.2, 129.5, 127.5, 126.6, 125.7, 124.0, 122.8, 121.6, 117.6, 35.0, 31.1 ppm; FT-IR (neat):  $\nu = 3113$ , 2965, 1645, 1598, 1340, 1134, 834, 769  $\text{cm}^{-1}$ ; HRMS (ESI),  $m/z$ :  $[\text{M} + \text{Na}]^+$  calcd for  $\text{C}_{20}\text{H}_{18}\text{N}_2\text{NaO}_2^+$  341.1260; found 341.1266.

### 3-(2-Bromophenyl)isoxazolo[4,5-*c*]isoquinolin-5(4*H*)-one (**23g**)

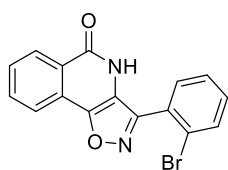

Yield: 58%; white solid; m.p. >240 °C (decomposed);  $R_f$  = 0.46 (*n*-hexane/EtOAc 1:1 v/v);  $^1\text{H}$  NMR (500 MHz, 4% TFA-*d* in  $\text{CDCl}_3$ ):  $\delta$  = 8.50 (d,  $J$  = 8.2 Hz, 1H), 8.21 (d,  $J$  = 8.0 Hz, 1H), 8.02 – 7.94 (m, 1H), 7.78 (q,  $J$  = 8.0, 7.4 Hz, 2H), 7.65 – 7.57 (m, 1H), 7.50 (dtd,  $J$  = 21.4, 7.5, 1.6 Hz, 2H) ppm;  $^{13}\text{C}$  NMR (125 MHz, 4% TFA-*d* in  $\text{CDCl}_3$ ):  $\delta$  = 163.6, 152.9, 150.9, 134.5, 133.6, 132.3, 132.1, 129.9, 129.5, 128.0, 127.8, 127.4, 125.7, 122.8, 121.5, 118.8 ppm; FT-IR (neat):  $\nu$  = 3077, 2971, 1652, 1596, 1339, 855, 760, 730, 700  $\text{cm}^{-1}$ ; HRMS (ESI),  $m/z$ :  $[\text{M} + \text{Na}]^+$  calcd for  $\text{C}_{16}\text{H}_9\text{BrN}_2\text{NaO}_2^+$  362.9740; found 362.9745.

### 3-(2-(Trifluoromethyl)phenyl)isoxazolo[4,5-*c*]isoquinolin-5(4*H*)-one (**23h**)

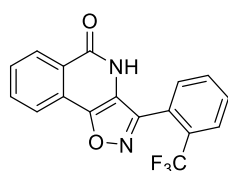

Yield: 61%; white solid; m.p. 238–239 °C;  $R_f$  = 0.47 (*n*-hexane/EtOAc 1:1 v/v);  $^1\text{H}$  NMR (500 MHz,  $\text{DMSO}-d_6$ ):  $\delta$  = 11.91 (br s, 1H), 8.35 (d,  $J$  = 8.0 Hz, 1H), 8.14 (d,  $J$  = 7.8 Hz, 1H), 7.99 – 7.95 (m, 2H), 7.90 – 7.71 (m, 4H) ppm;  $^{13}\text{C}$  NMR (125 MHz,  $\text{DMSO}-d_6$ ):  $\delta$  = 161.7, 151.7, 148.9, 134.2, 133.1, 133.1, 131.3, 130.2, 129.3, 129.2 (q,  $J$  = 30.6 Hz, 1C) 126.9 (q,  $J$  = 4.9 Hz, 1C), 126.2, 125.1 (q,  $J$  = 4.1 Hz, 1C), 125.1, 124.1 (q,  $J$  = 273.7 Hz, 1C), 121.5, 121.4 ppm;  $^{19}\text{F}$  NMR (470 MHz, 4% TFA-*d* in  $\text{CDCl}_3$ )  $\delta$  = –57.79 (s, 3F) ppm; FT-IR (neat):  $\nu$  = 3080, 2981, 1645, 1595, 1341, 1311, 1123, 1068, 1037, 766  $\text{cm}^{-1}$ ; HRMS (ESI),  $m/z$ :  $[\text{M} + \text{Na}]^+$  calcd for  $\text{C}_{17}\text{H}_9\text{F}_3\text{N}_2\text{NaO}_2^+$  353.0508; found 353.0517.

### 3-(Perfluorophenyl)isoxazolo[4,5-*c*]isoquinolin-5(4*H*)-one (**23k**)

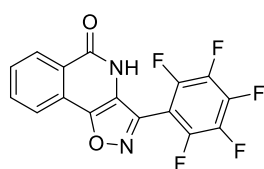

Yield: 29%; white solid; m.p. >260 °C (decomposed);  $R_f$  = 0.47 (*n*-hexane/EtOAc 3:1 v/v);  $^1\text{H}$  NMR (500 MHz, 4% TFA-*d* in  $\text{CDCl}_3$ ):  $\delta$  = 8.58 (d,  $J$  = 8.1 Hz, 1H), 8.27 (d,  $J$  = 7.9 Hz, 1H), 8.05 (t,  $J$  = 7.6 Hz, 1H), 7.86 (t,  $J$  = 7.7 Hz, 1H) ppm;  $^{13}\text{C}$  NMR (125 MHz, 4% TFA-*d* in  $\text{CDCl}_3$ ):  $\delta$  = 164.5, 152.1, 141.5, 135.1, 130.7, 129.6, 125.3, 124.1, 121.6, 118.6 ppm;  $^{19}\text{F}$  NMR (470 MHz, 4% TFA-*d* in  $\text{CDCl}_3$ )  $\delta$  = –137.51 – –137.62 (m, 2F), –147.82 (t,  $J$  = 20.8 Hz, 1F), –159.30 – –159.44 (m, 2F) ppm; FT-IR (neat):  $\nu$  = 3087, 1649, 1600, 1474, 1342, 1180, 899  $\text{cm}^{-1}$ ; HRMS (ESI),  $m/z$ :  $[\text{M} + \text{Na}]^+$  calcd for  $\text{C}_{16}\text{H}_5\text{F}_5\text{N}_2\text{NaO}_2^+$  375.0163; found 375.0163.

### 3-(2,6-Dichlorophenyl)isoxazolo[4,5-*c*]isoquinolin-5(4*H*)-one (**23l**)

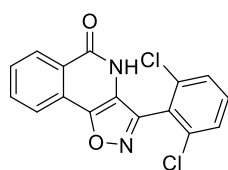

Yield: 46%; white solid; m.p. >270 °C (decomposed);  $R_f$  = 0.47 (*n*-hexane/EtOAc 1:1 v/v);  $^1\text{H}$  NMR (500 MHz, 4% TFA-*d* in  $\text{CDCl}_3$ ):  $\delta$  = 8.55 (d,  $J$  = 8.1 Hz, 1H), 8.26 (d,  $J$  = 8.0 Hz, 1H), 8.01 (t,  $J$  = 7.7 Hz, 1H), 7.81 (t,  $J$  = 7.9 Hz, 1H), 7.58 – 7.47 (m, 3H) ppm;  $^{13}\text{C}$  NMR (125 MHz, 4% TFA-*d* in  $\text{CDCl}_3$ ):  $\delta$  = 164.3, 151.3, 149.1, 135.9, 134.8, 132.6, 130.2, 129.5, 128.7, 125.7, 124.2, 124.0, 121.6, 118.9

ppm; FT-IR (neat):  $\nu = 2914, 1652, 1602, 1434, 1339, 1196, 894, 783, 772 \text{ cm}^{-1}$ ; HRMS (ESI),  $m/z$ :  $[M + Na]^+$  calcd for  $C_{16}H_8Cl_2N_2NaO_2^+$  352.9855; found 352.9863.

3-Heptylisoxazolo[4,5-*c*]isoquinolin-5(4*H*)-one (**23o**)

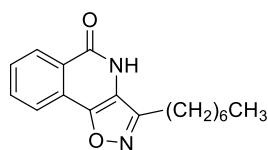

Yield: 80%; white solid; m.p. 177–178 °C;  $R_f = 0.46$  (*n*-hexane/EtOAc 2:1 *v/v*);  $^1H$  NMR (500 MHz, DMSO- $d_6$ ):  $\delta = 11.94$  (br s, 1H), 8.32 (dd,  $J = 8.2, 1.3$  Hz, 1H), 8.01 (d,  $J = 7.9$  Hz, 1H), 7.90 (td,  $J = 7.6, 1.3$  Hz, 1H), 7.72 (t,  $J = 7.2$  Hz, 1H), 2.84 (t,  $J = 7.6$  Hz, 2H), 1.67 (p,  $J = 7.4$  Hz, 2H), 1.37 – 1.21 (m, 8H), 0.84 (t,  $J = 6.8$  Hz, 3H) ppm;  $^{13}C$  NMR (125 MHz, DMSO- $d_6$ ):  $\delta = 161.8, 154.1, 148.4, 133.9, 129.6, 129.3, 126.0, 125.4, 121.2, 120.5, 31.6, 29.0, 28.8, 27.7, 24.1, 22.5, 14.4$  ppm; FT-IR (neat):  $\nu = 2952, 2924, 2850, 1662, 1602, 1424, 1335, 1241, 859, 764 \text{ cm}^{-1}$ ; HRMS (ESI),  $m/z$ :  $[M + Na]^+$  calcd for  $C_{17}H_{20}N_2NaO_2^+$  307.1417; found 307.1409.

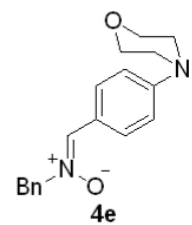

$^1\text{H}$  NMR, 500 MHz  
 $\text{CDCl}_3$ , 25  $^\circ\text{C}$

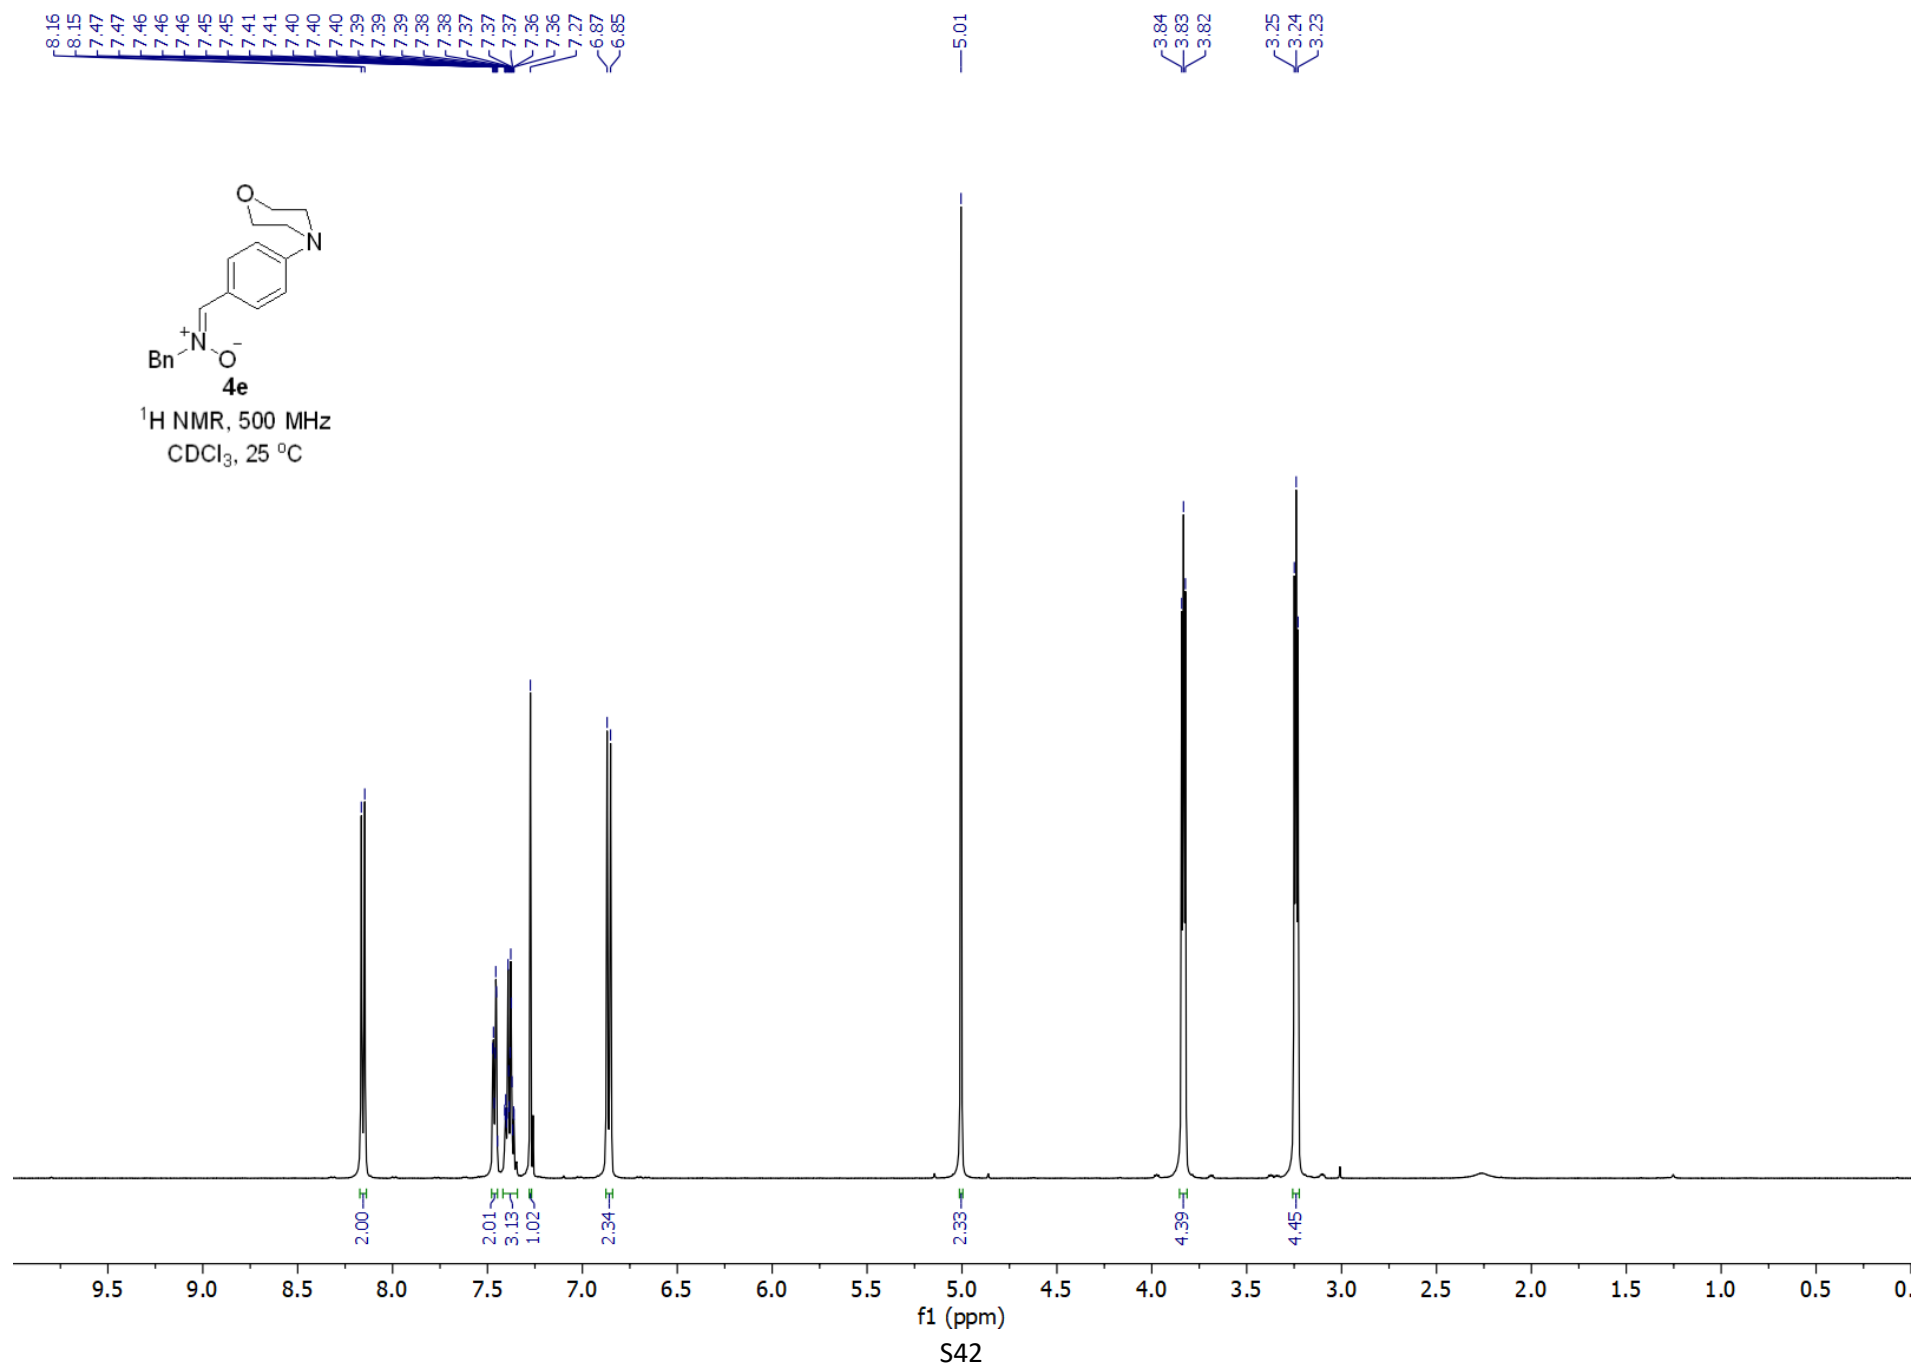

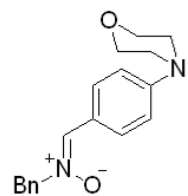

**4e**  
 $^{13}\text{C}$  NMR, 125 MHz  
 $\text{CDCl}_3$ , 25  $^\circ\text{C}$

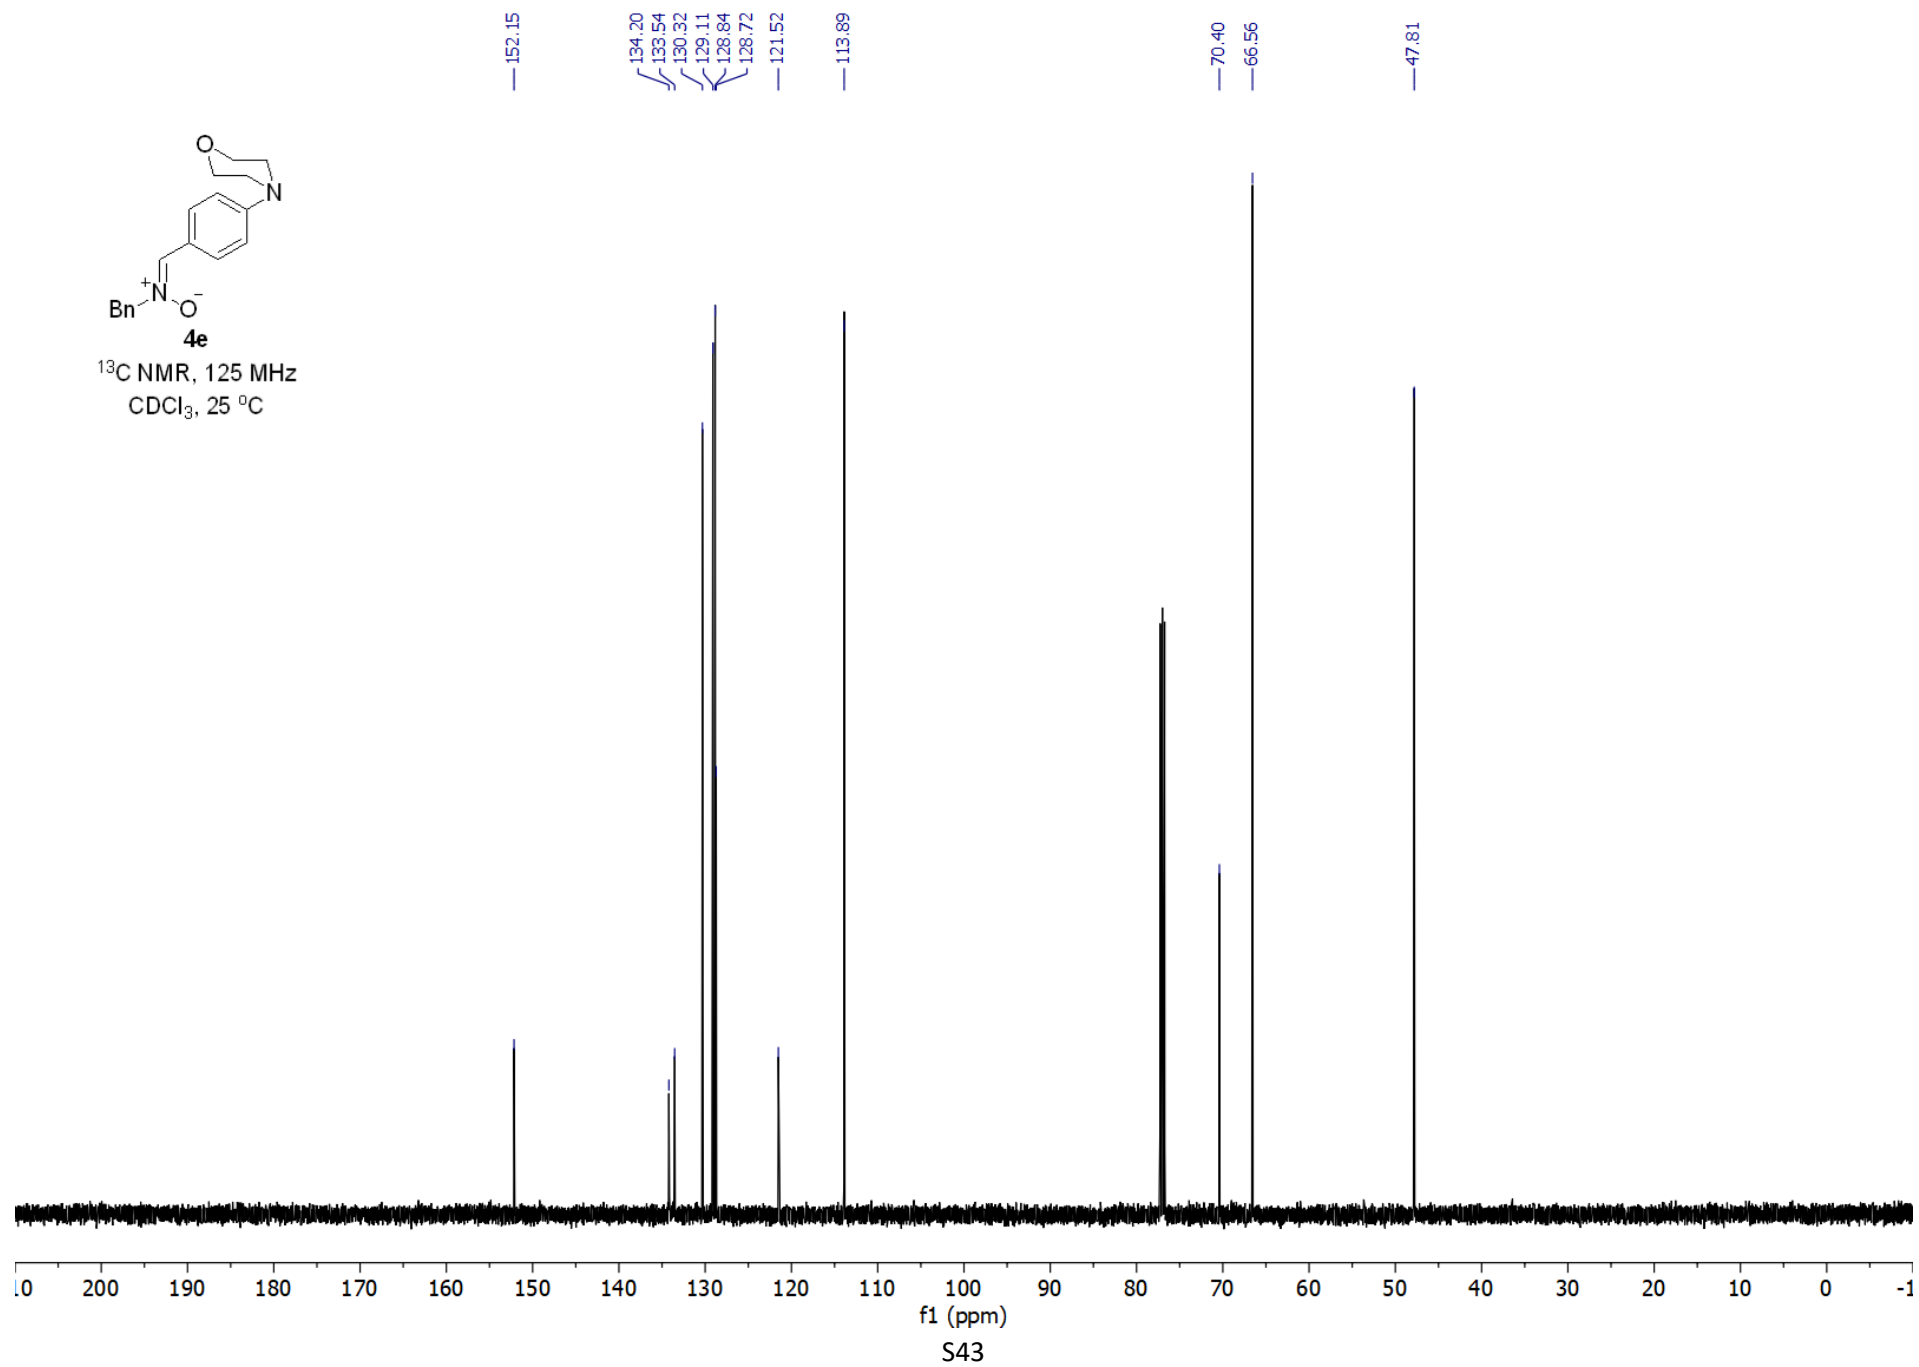

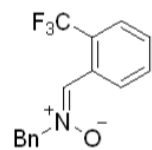

**4g**

<sup>1</sup>H NMR, 500 MHz  
CDCl<sub>3</sub>, 25 °C

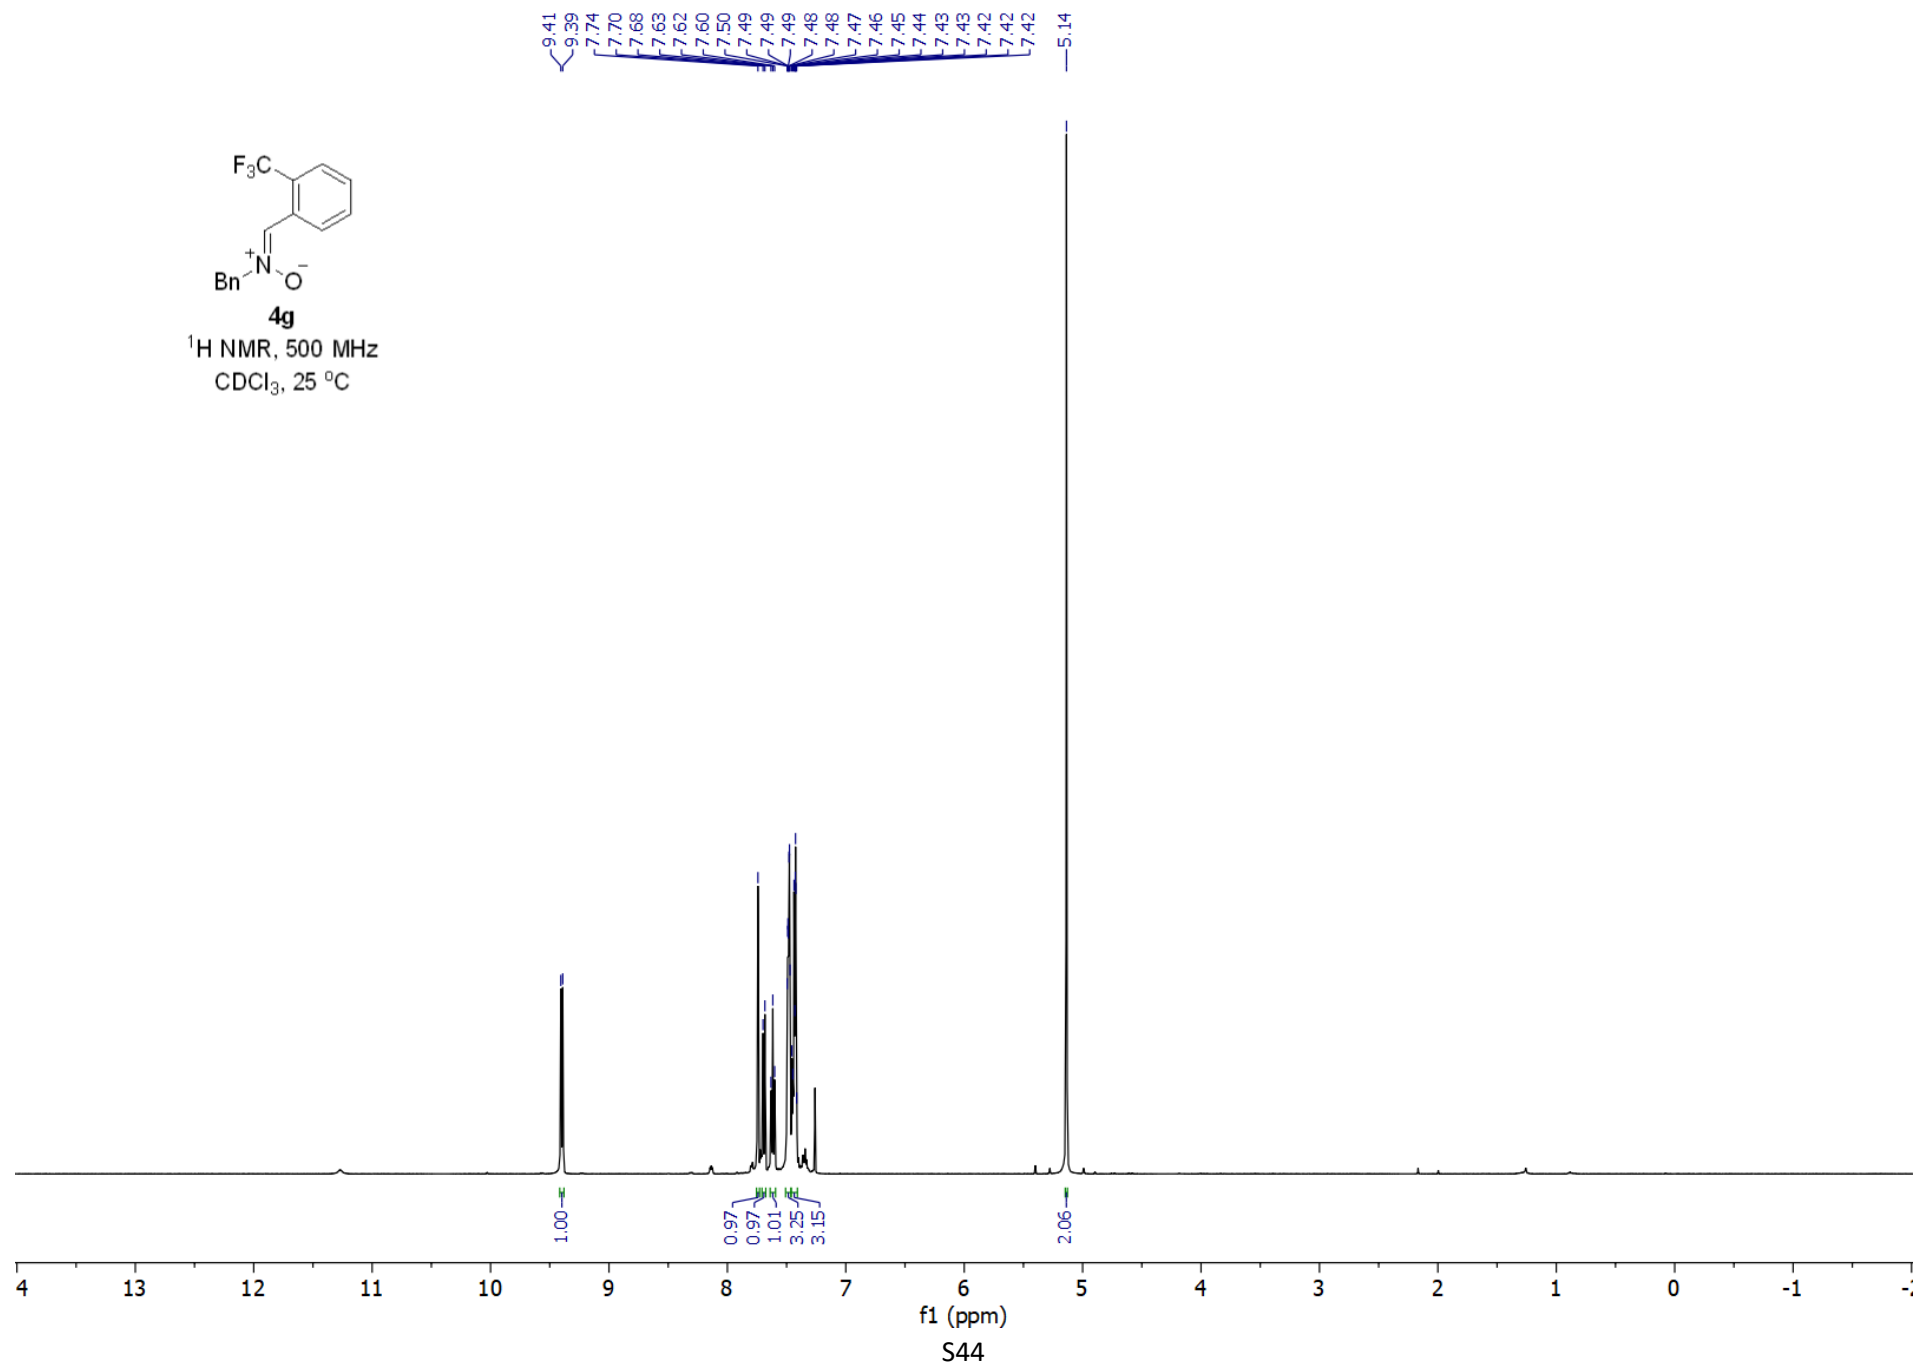

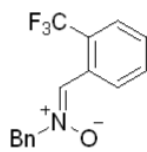

**4g**

$^{13}\text{C}$  NMR, 125 MHz

$\text{CDCl}_3$ , 25 °C

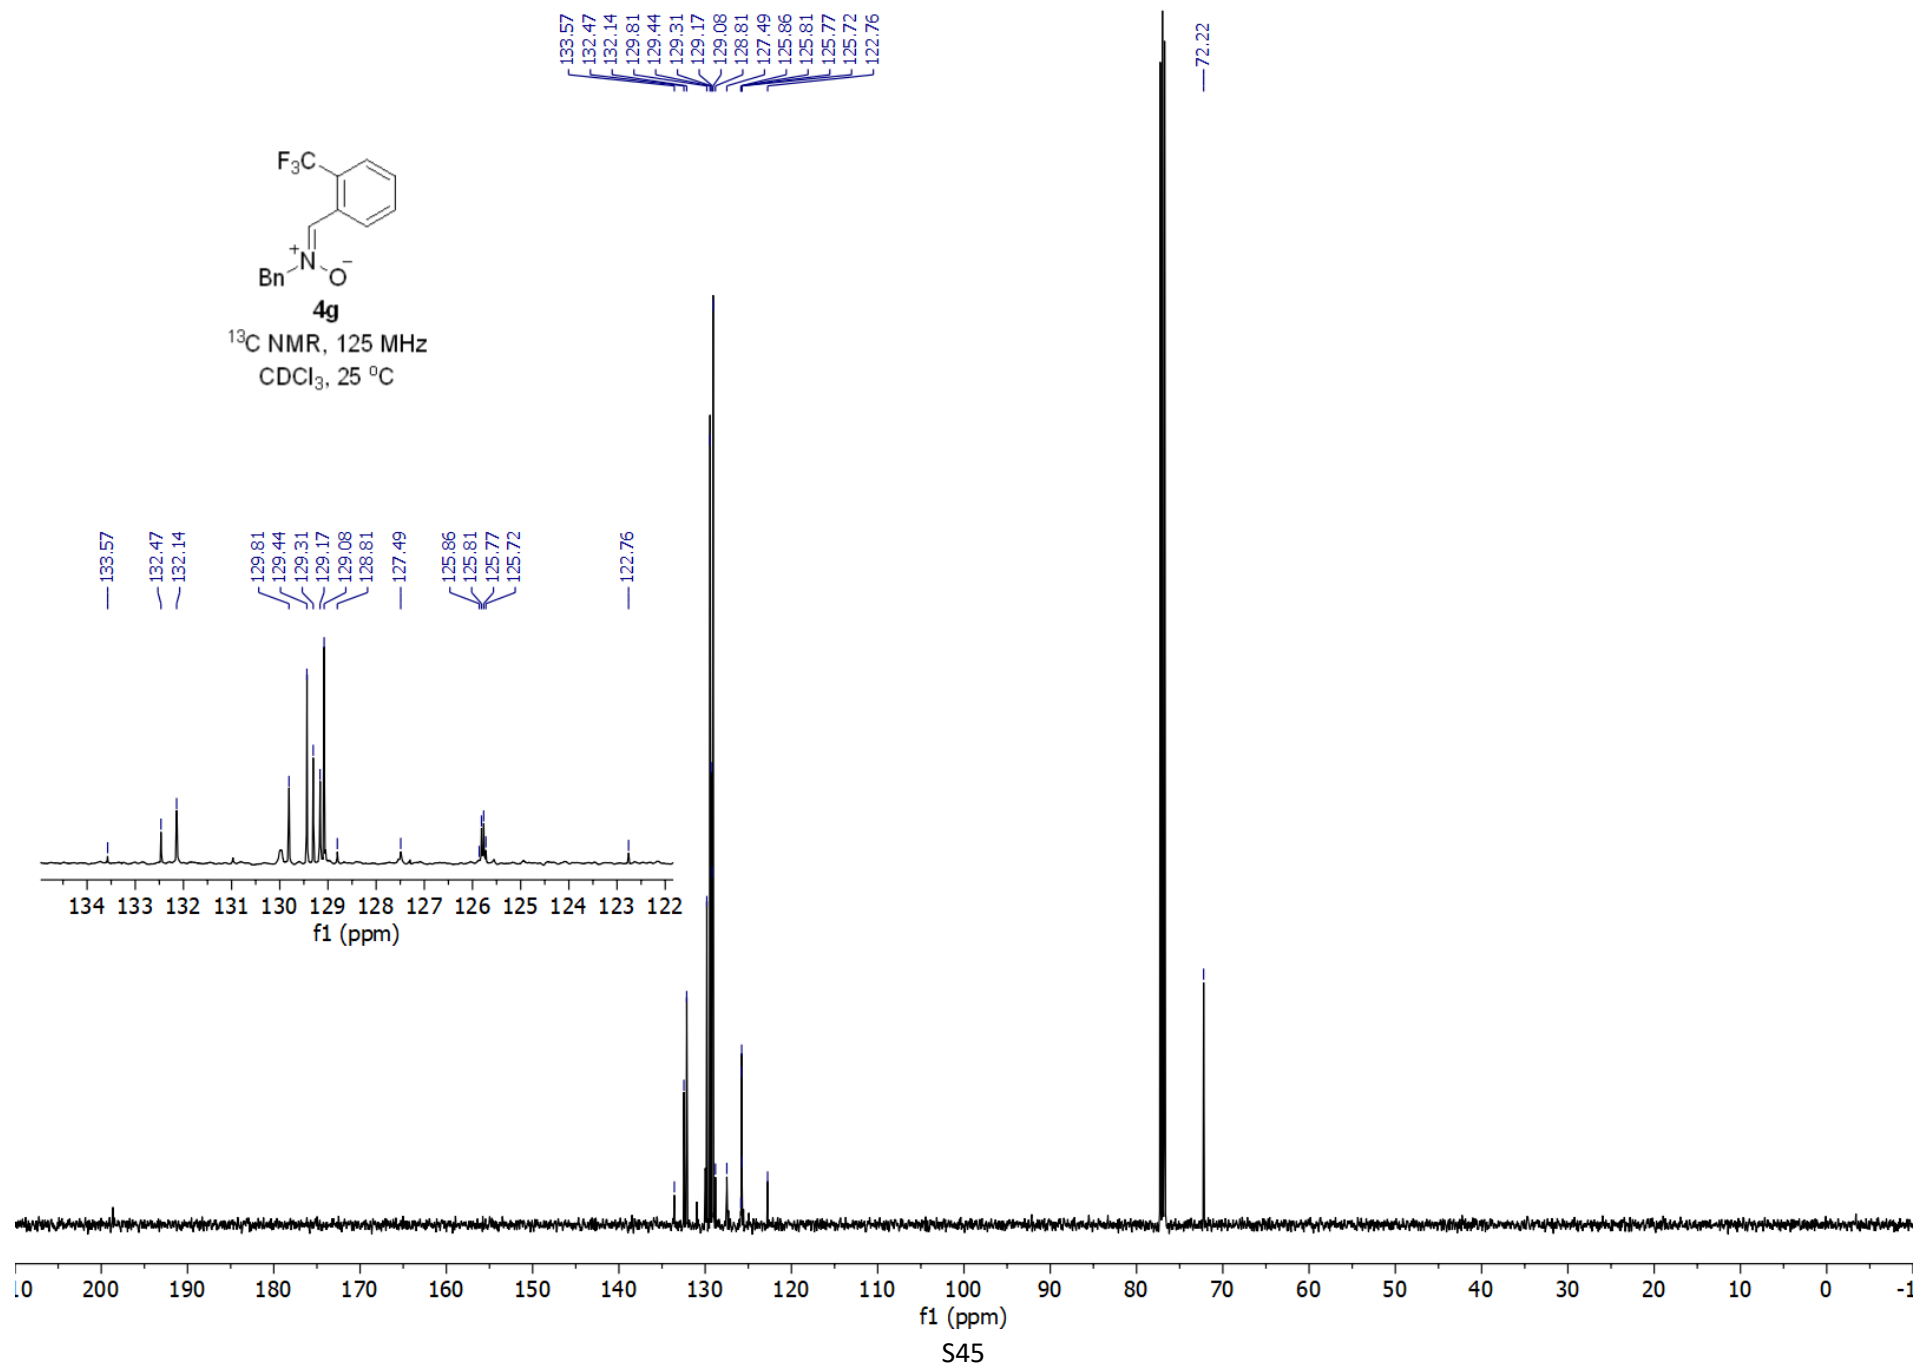

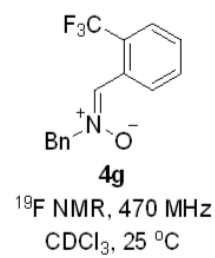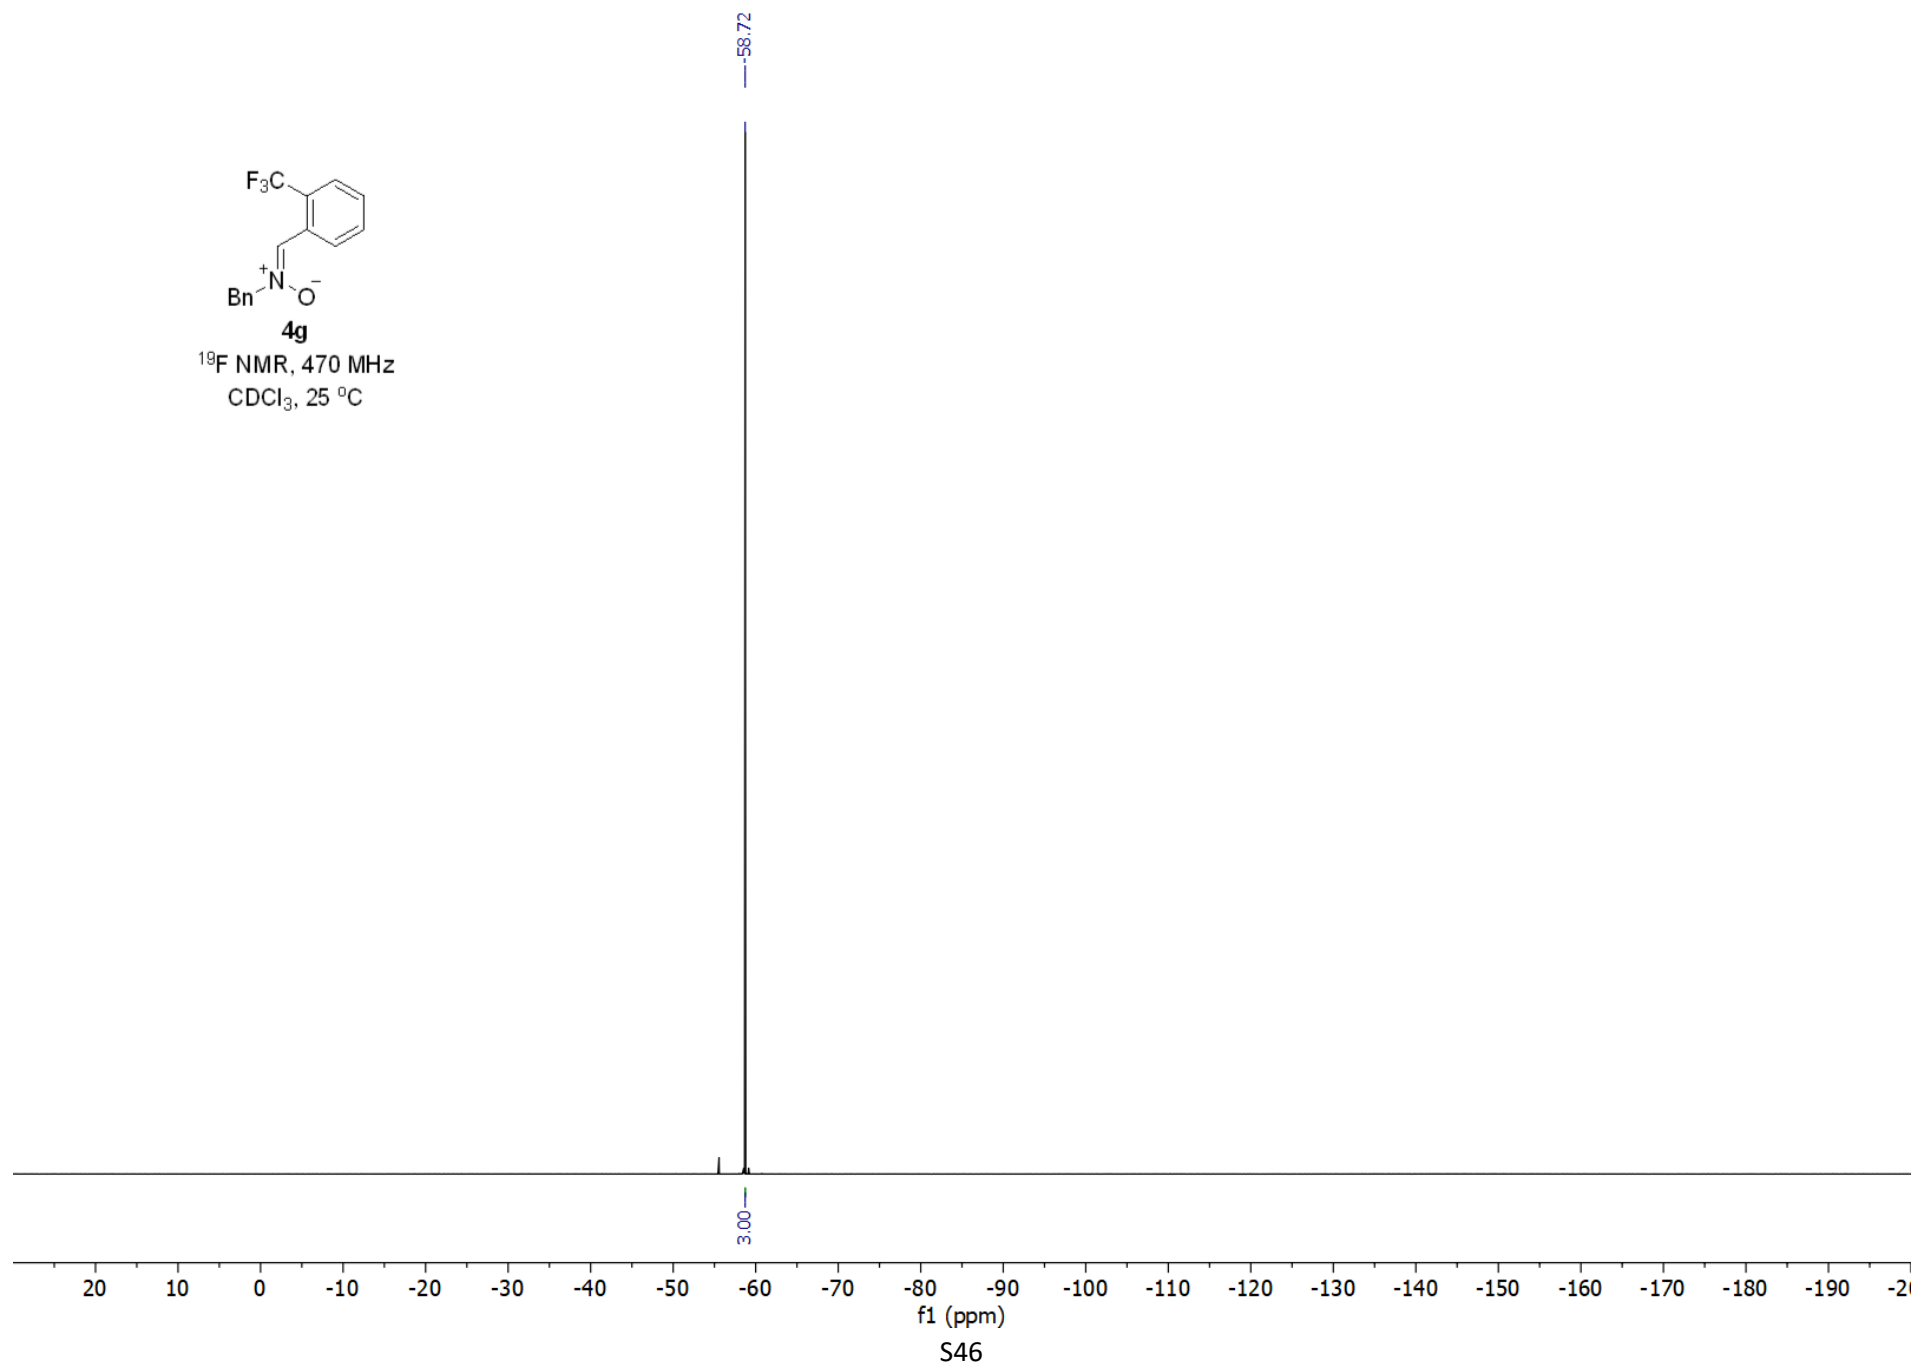

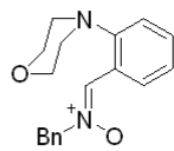

**4i**

$^1\text{H}$  NMR, 500 MHz  
 $\text{CDCl}_3$ , 25  $^\circ\text{C}$

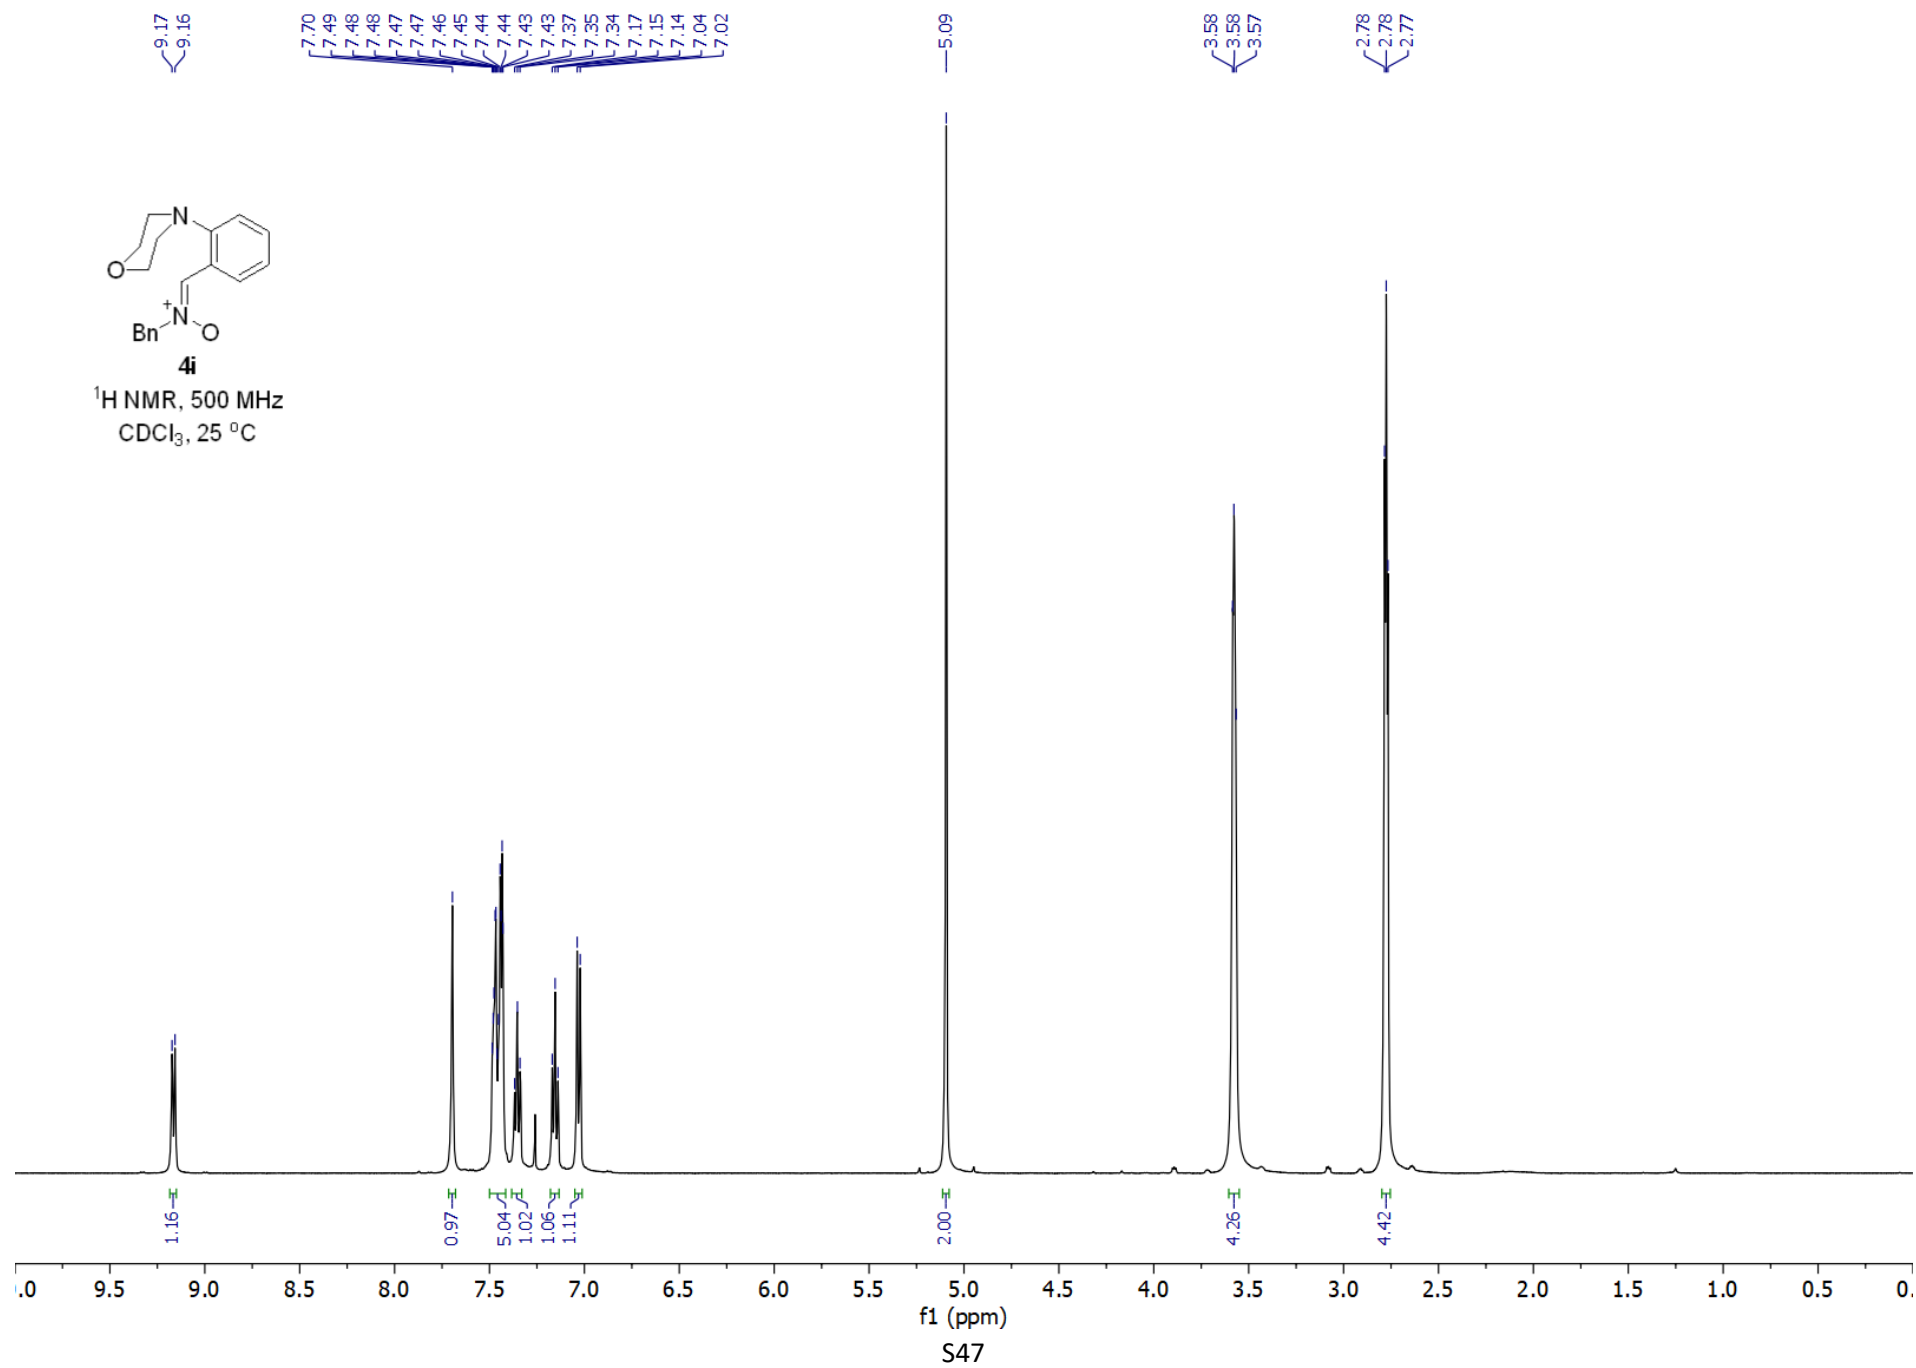

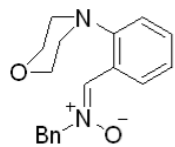

**4i**

$^{13}\text{C}$  NMR, 125 MHz  
 $\text{CDCl}_3$ , 25  $^\circ\text{C}$

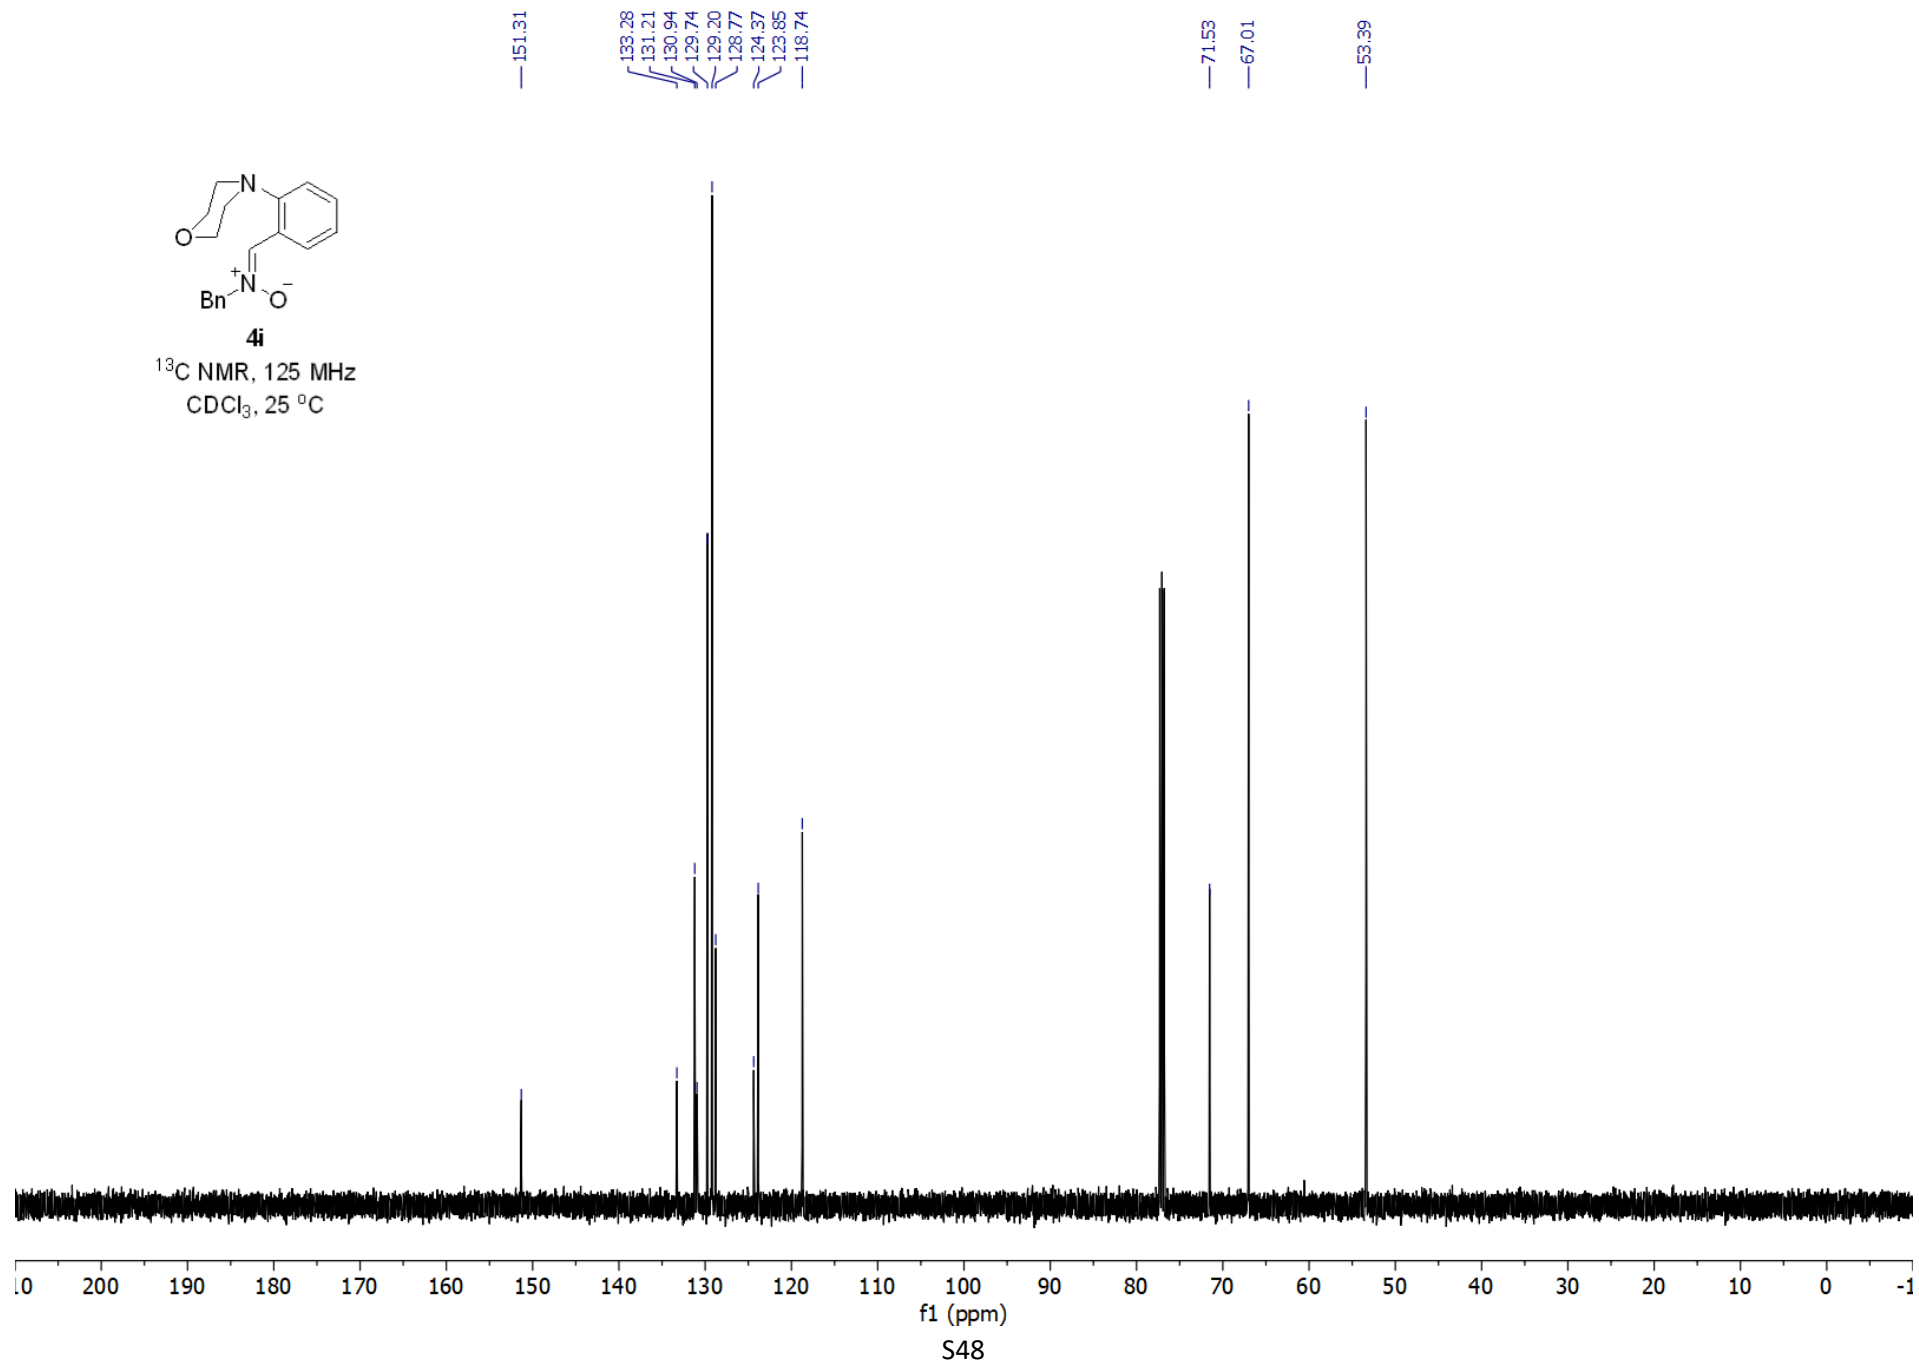

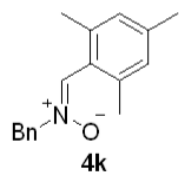

<sup>1</sup>H NMR, 500 MHz  
CDCl<sub>3</sub>, 25 °C

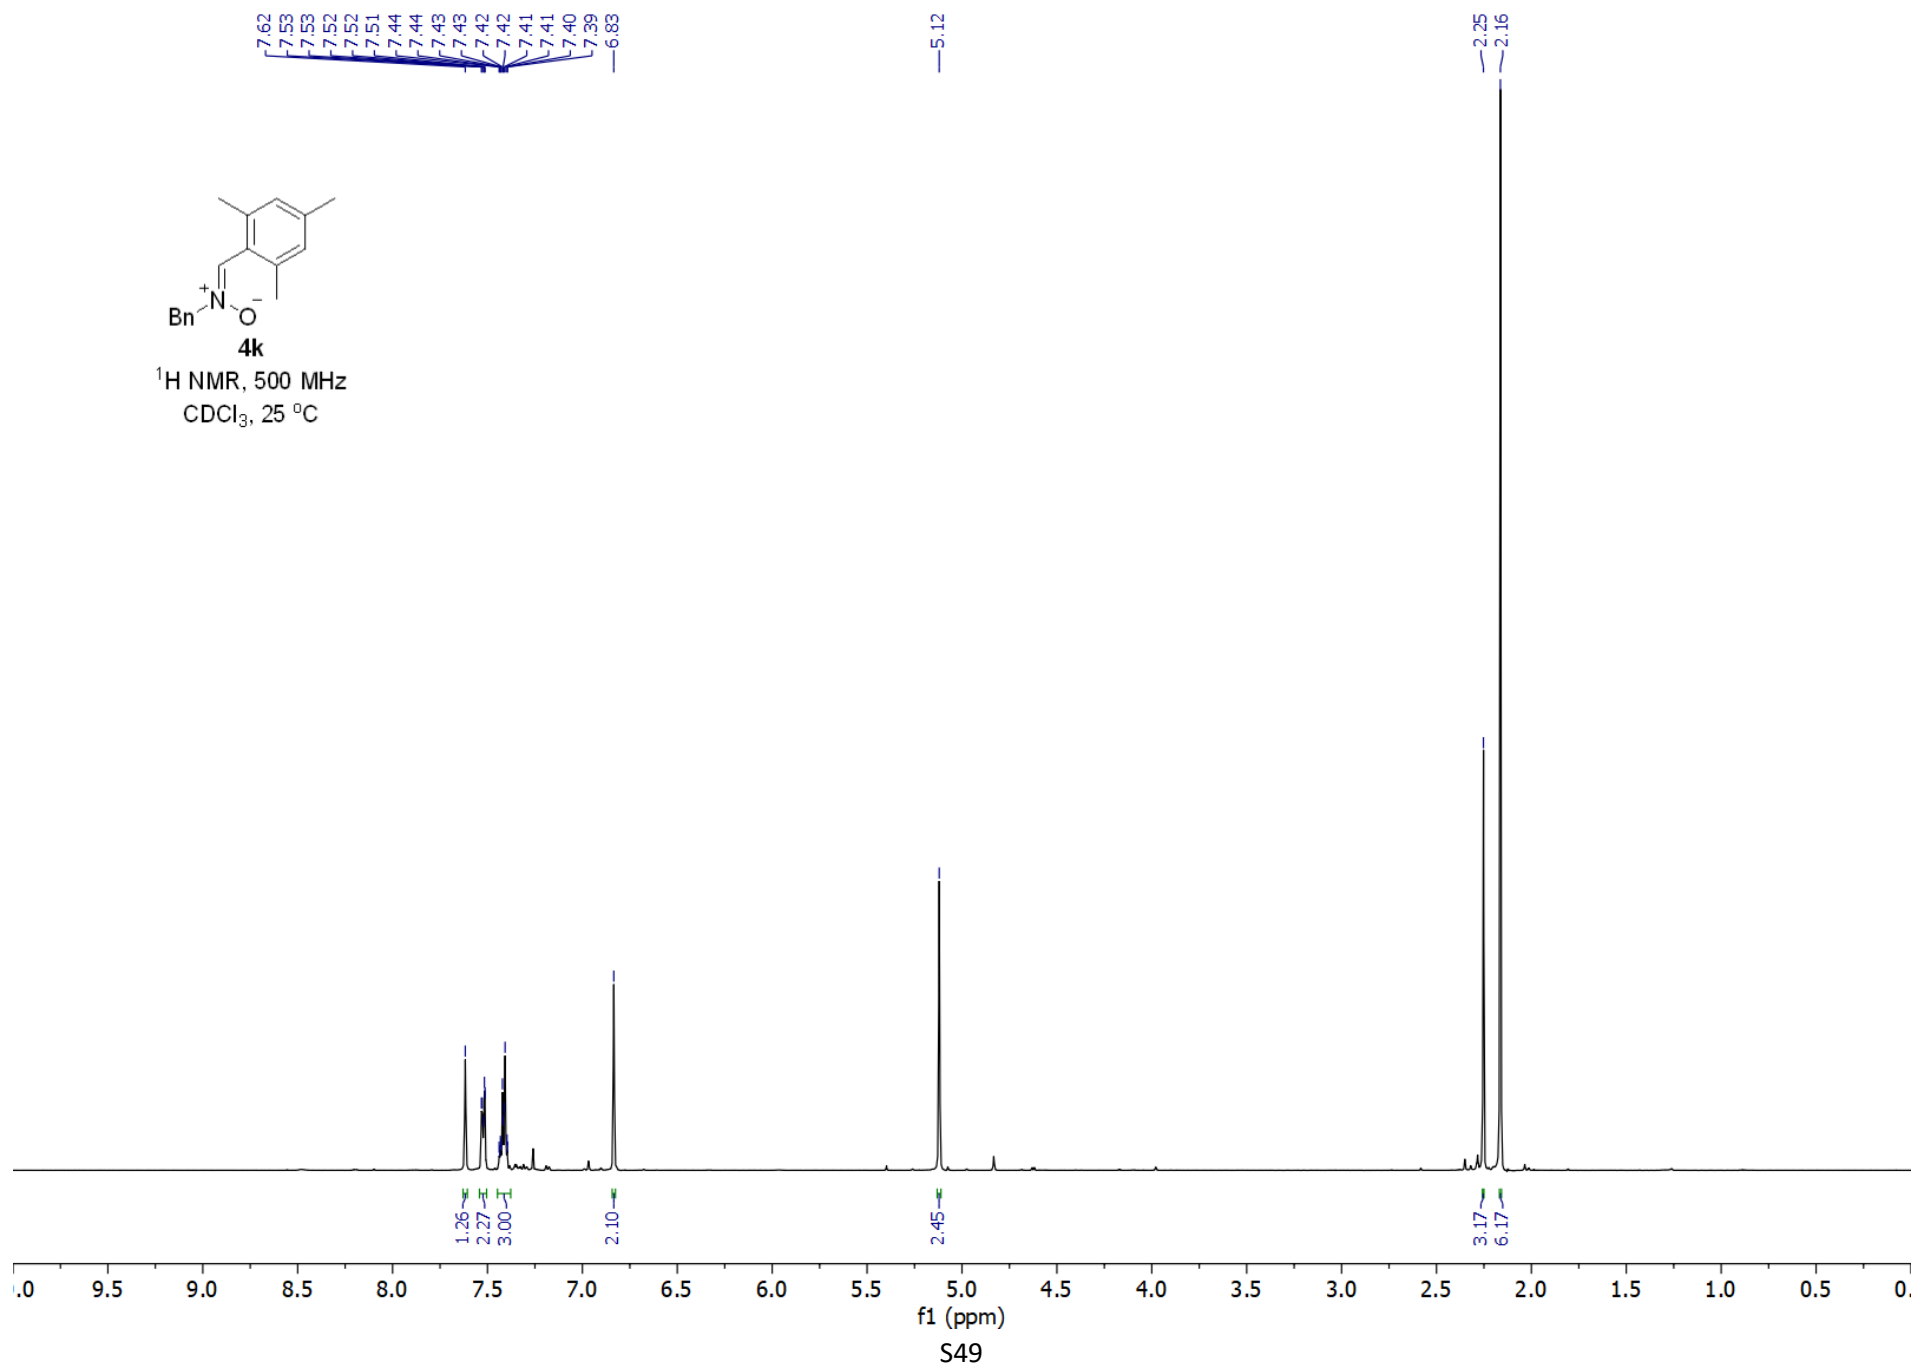

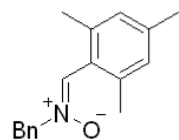

**4k**

$^{13}\text{C}$  NMR, 125 MHz  
 $\text{CDCl}_3$ , 25 °C

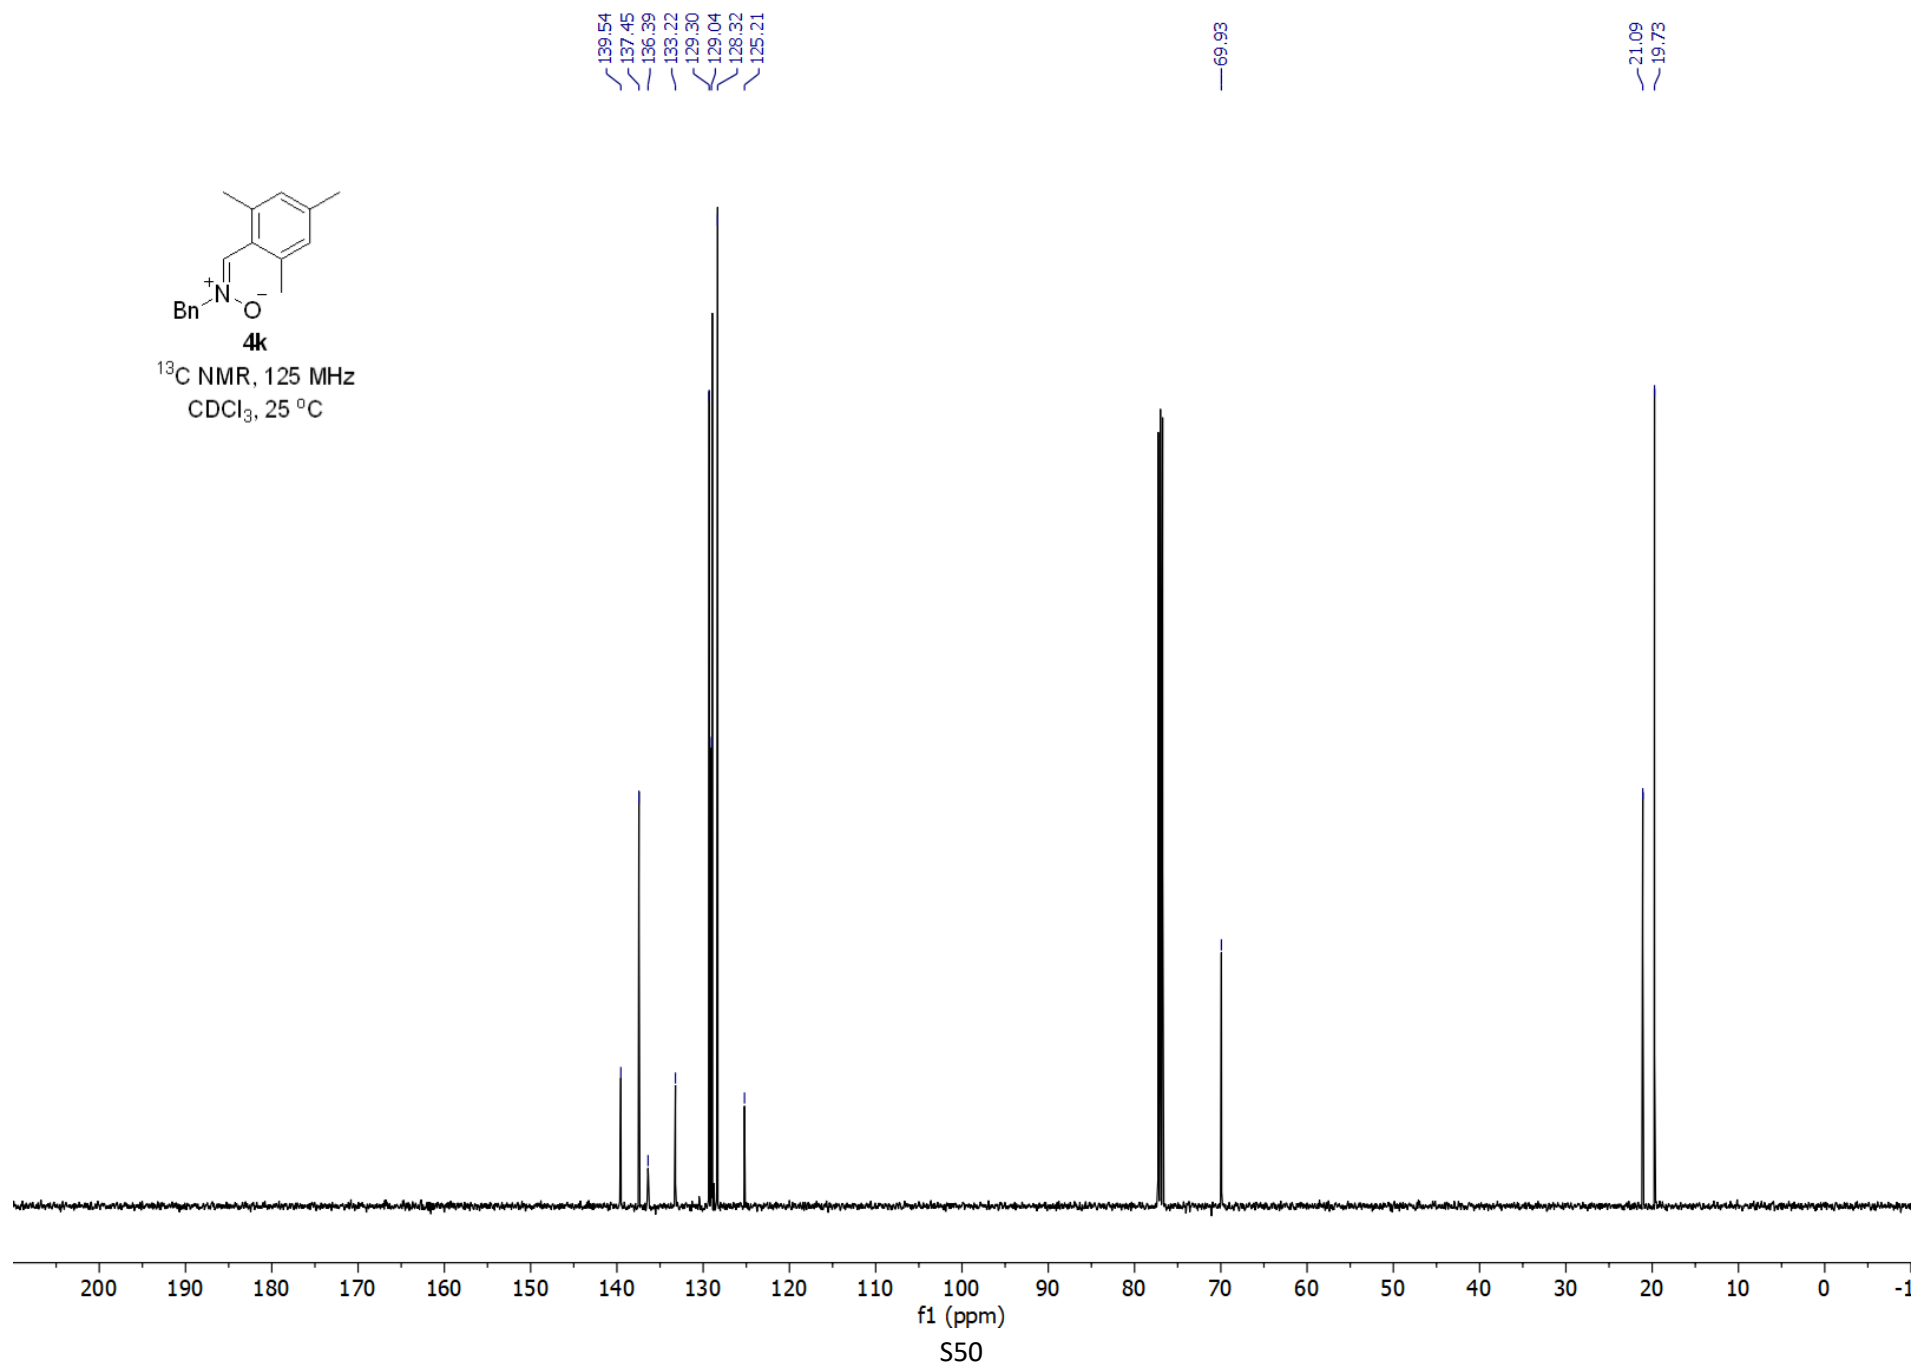

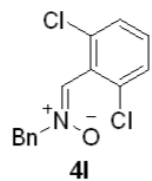

$^1\text{H}$  NMR, 500 MHz  
 $\text{CDCl}_3$ , 25  $^\circ\text{C}$

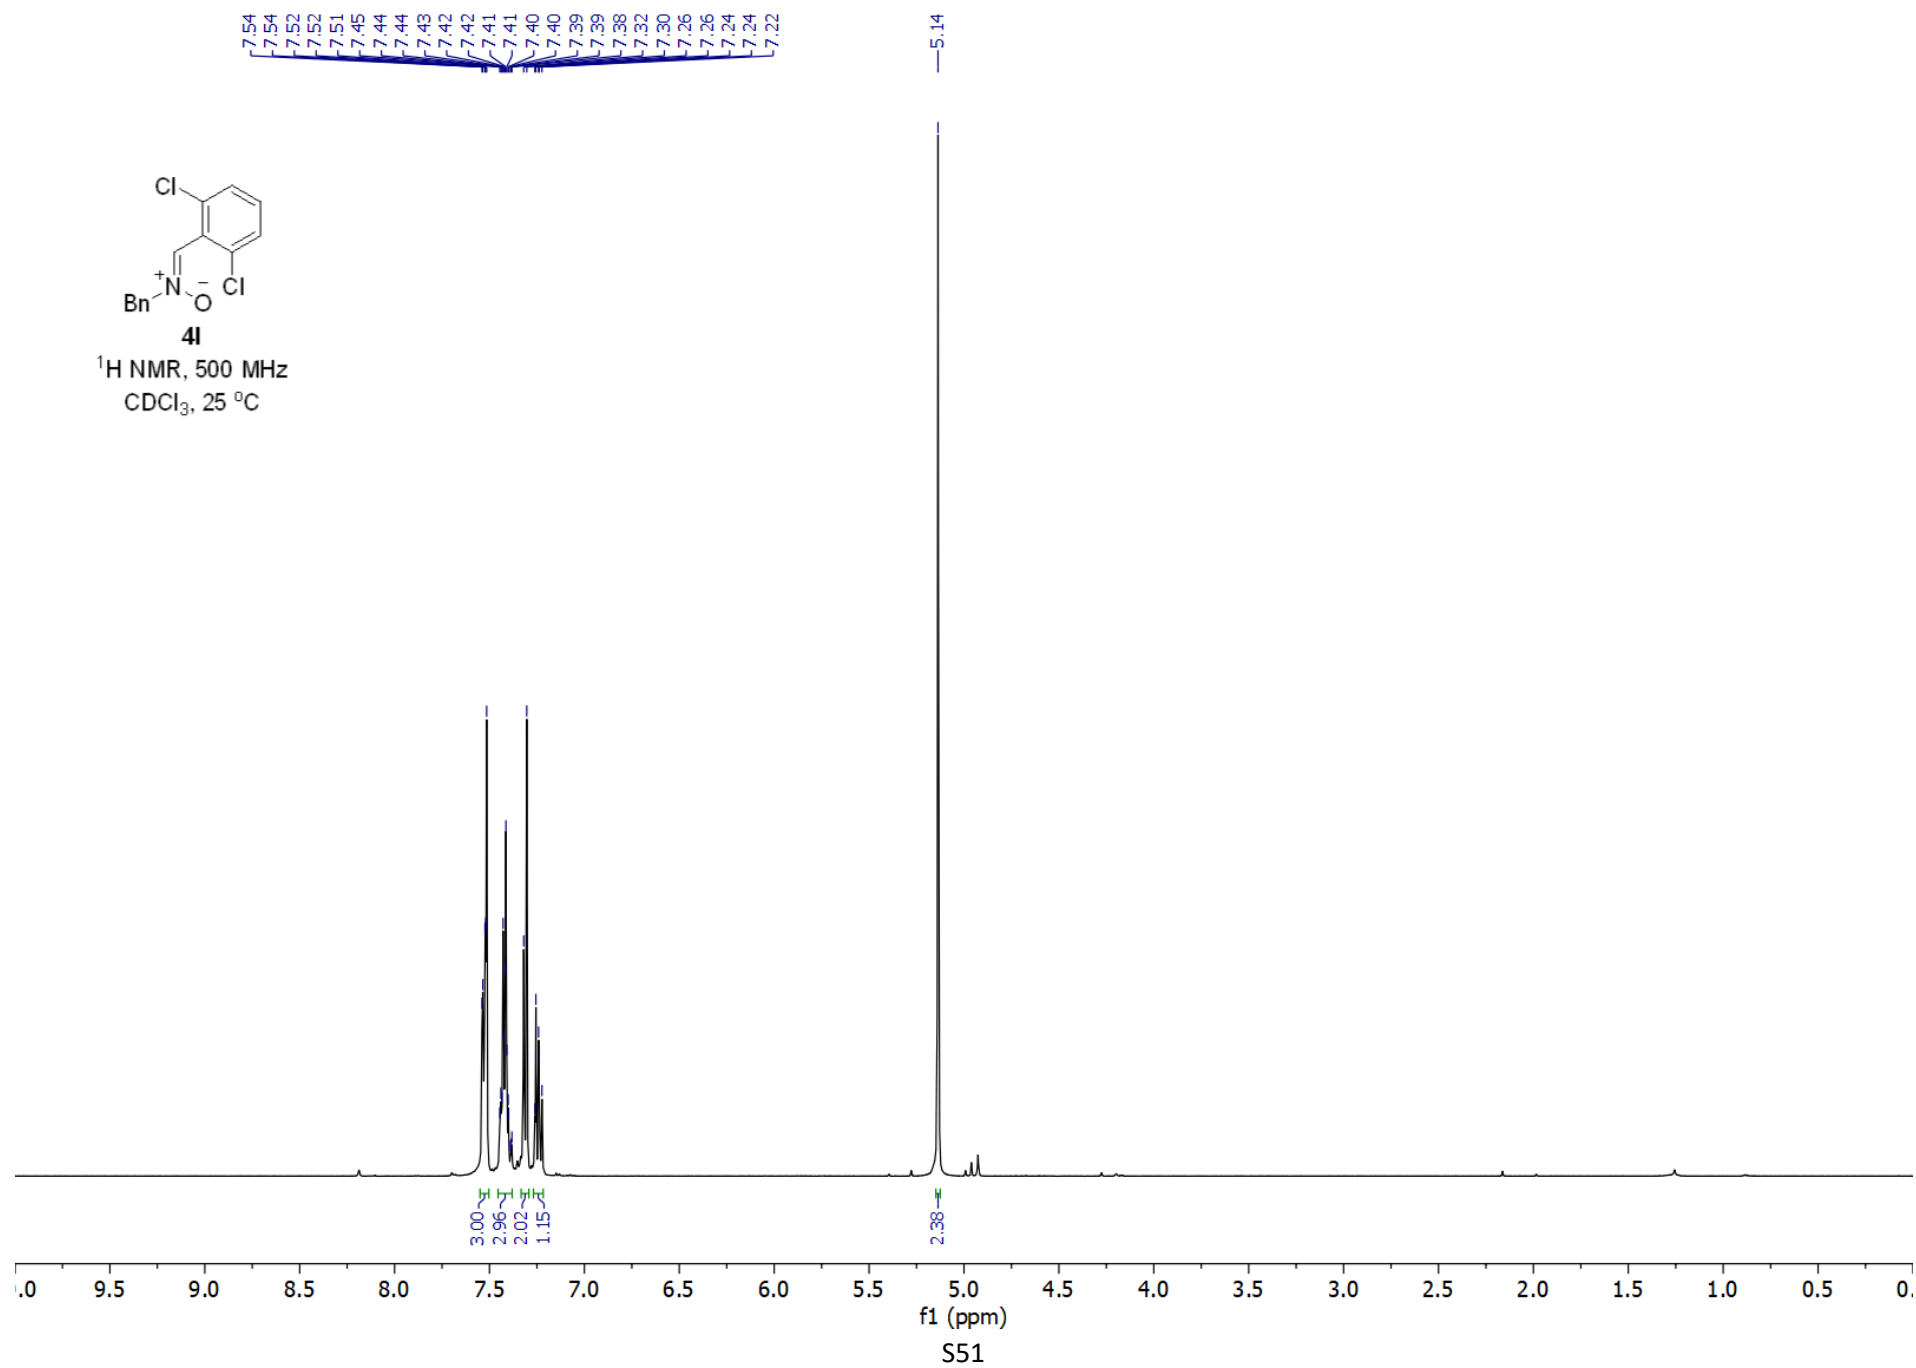

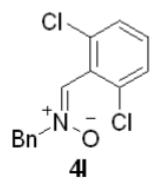

$^{13}\text{C}$  NMR, 125 MHz  
 $\text{CDCl}_3$ , 25  $^\circ\text{C}$

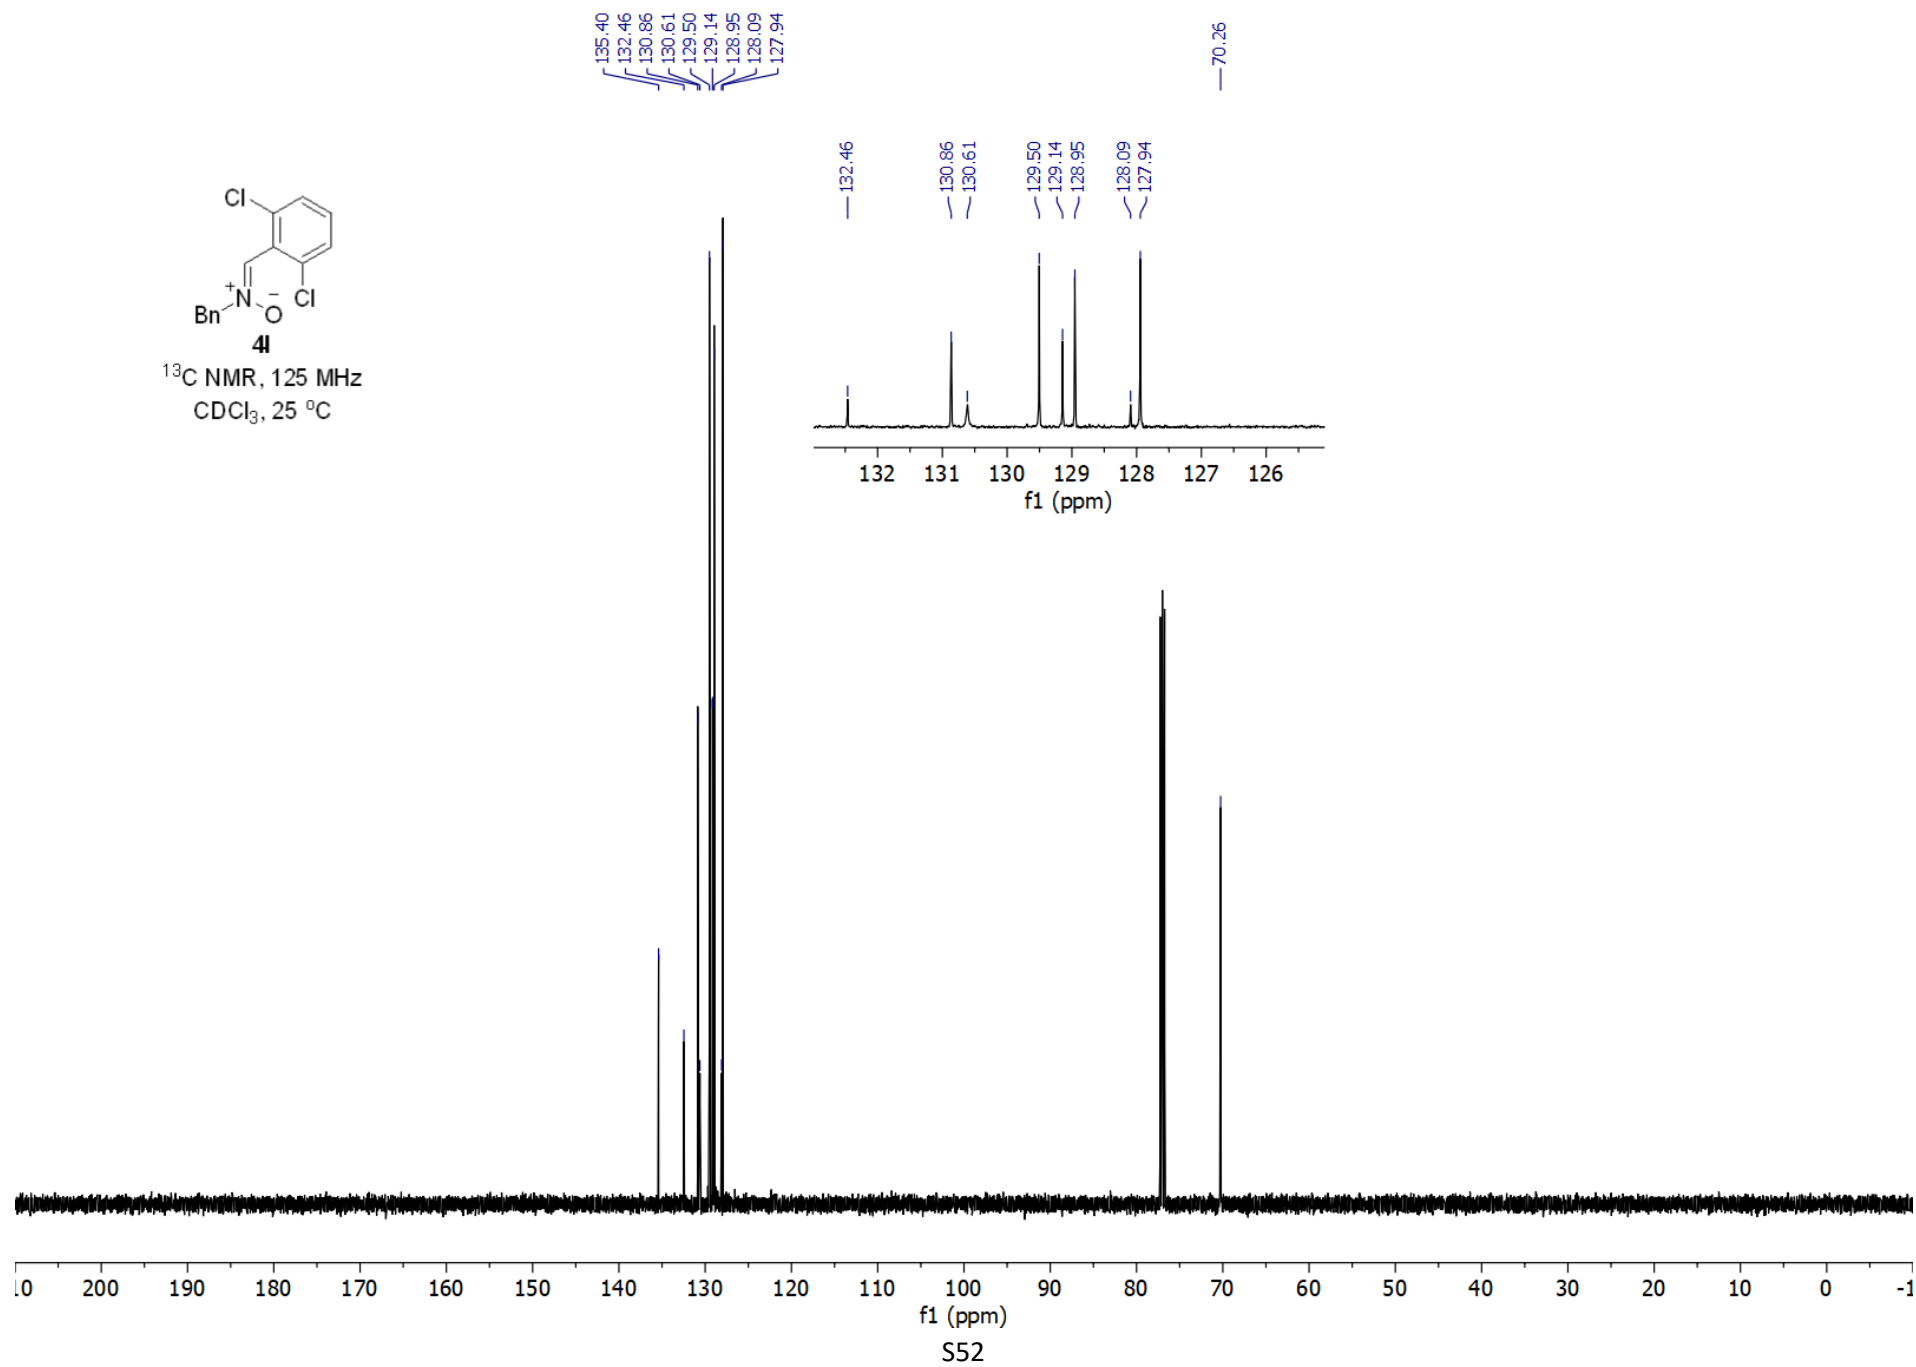

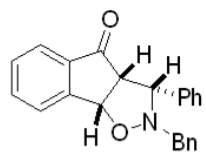

**6a**

$^1\text{H}$  NMR, 500 MHz  
DMSO- $d_6$ , 25  $^\circ\text{C}$

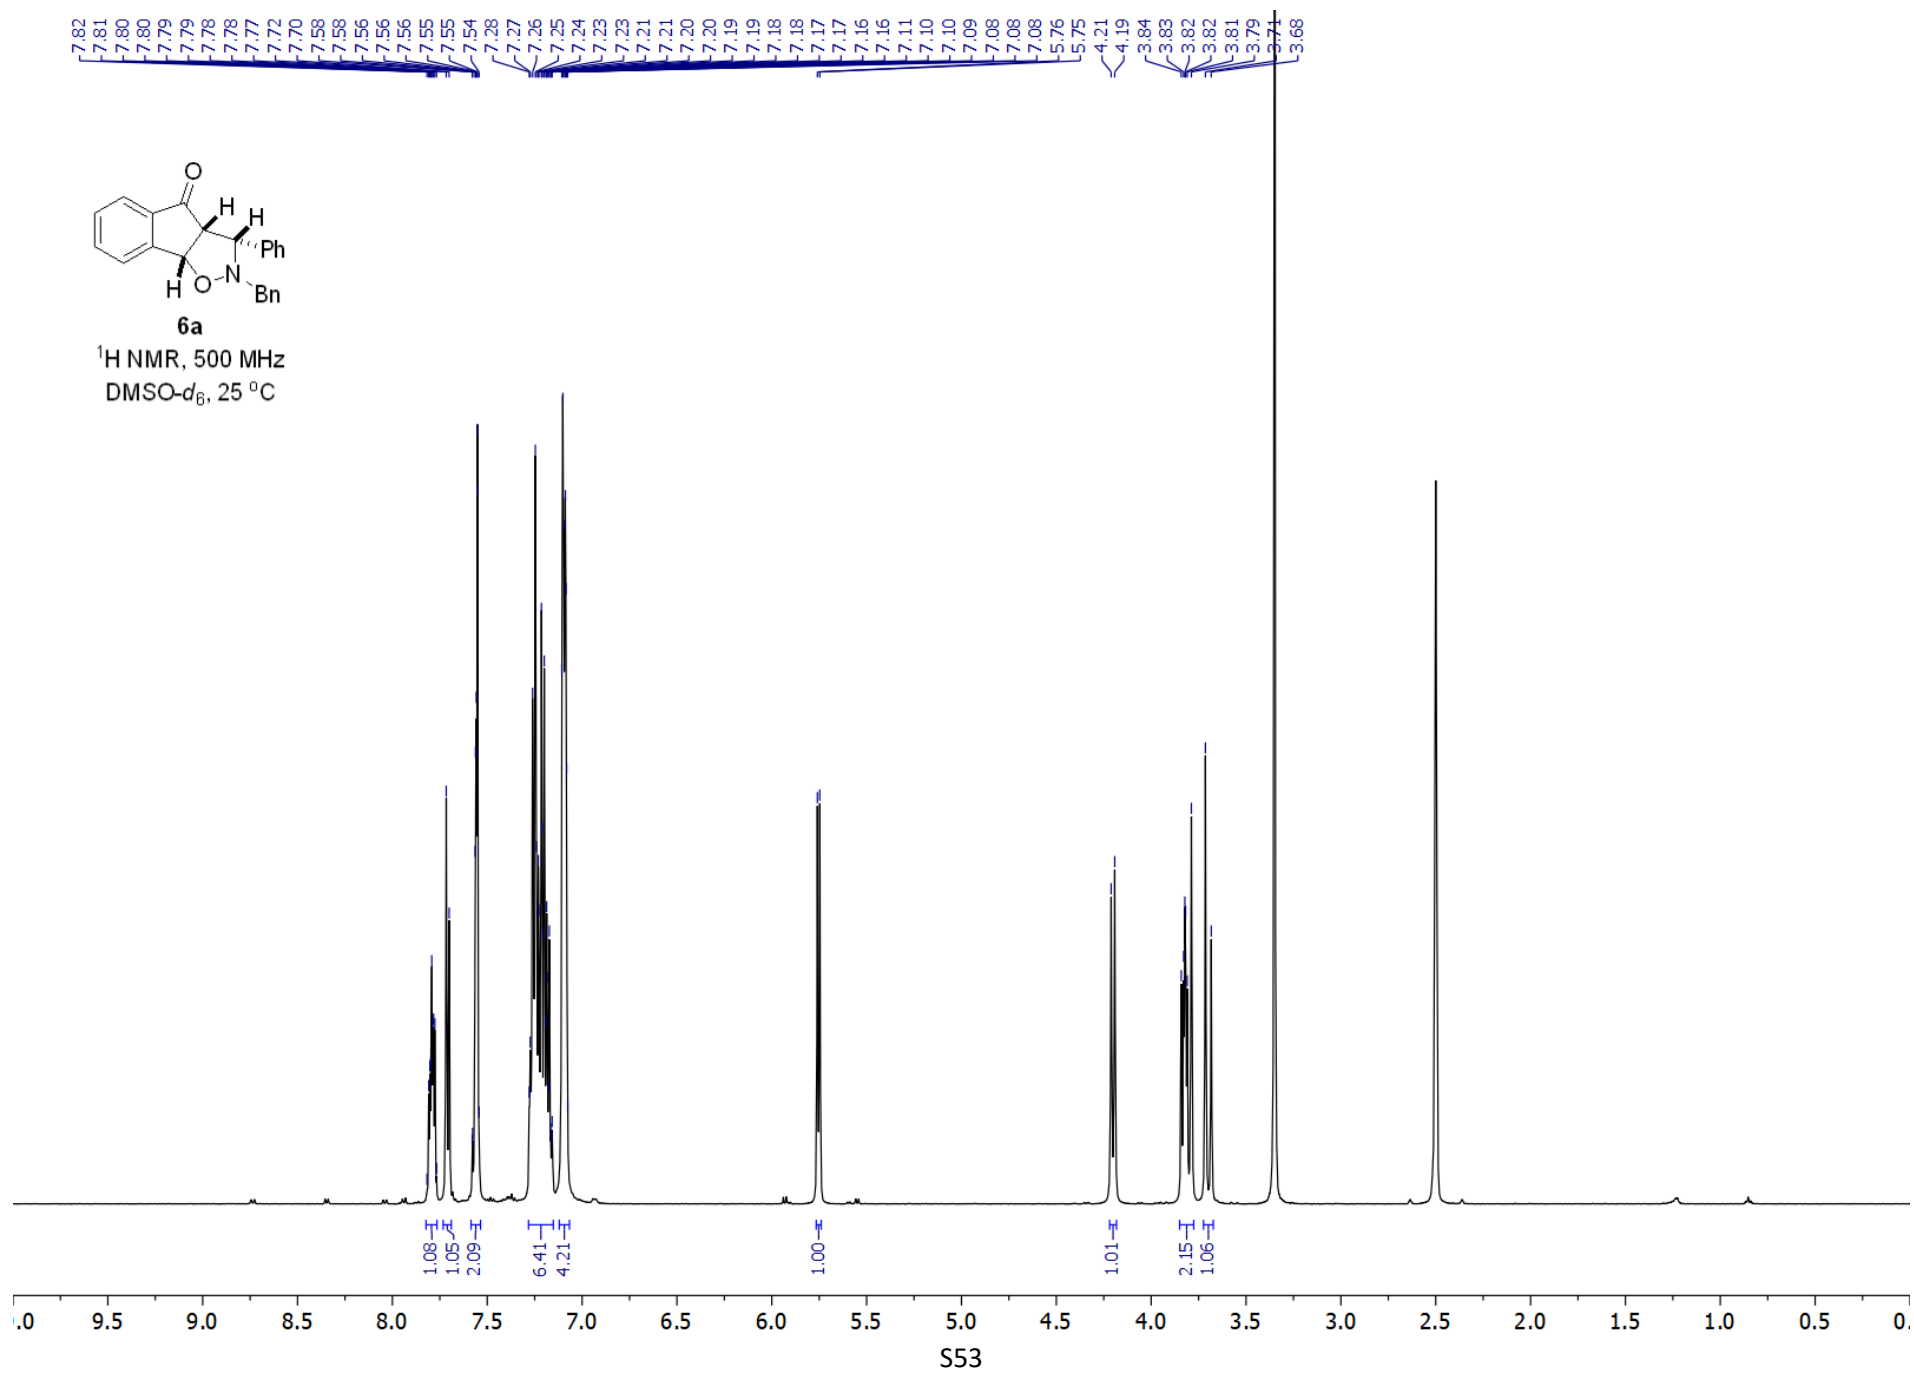

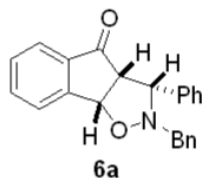

$^{13}\text{C}$  NMR, 125 MHz  
DMSO- $d_6$ , 25 °C

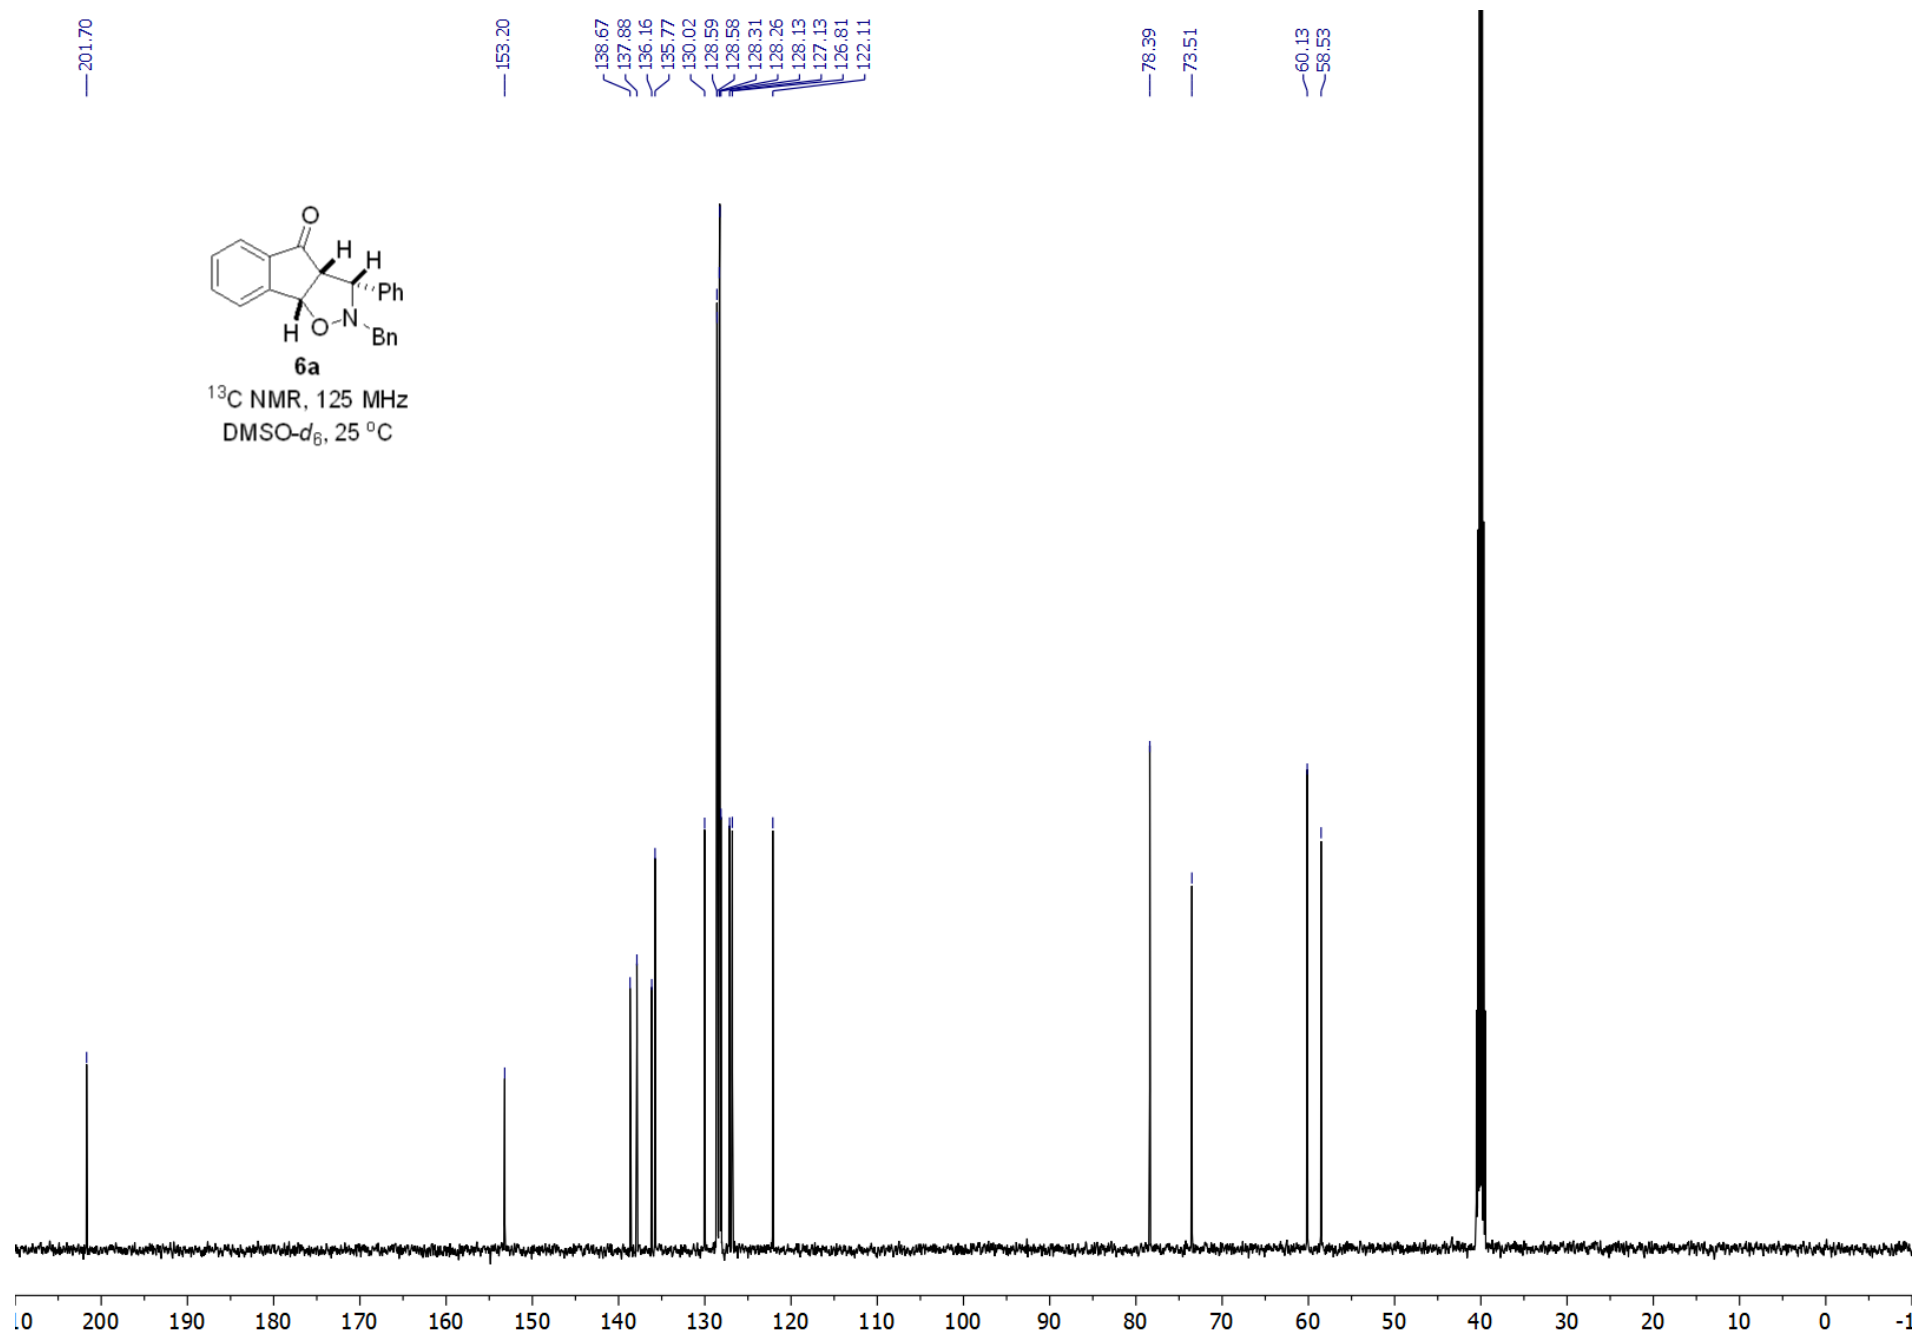

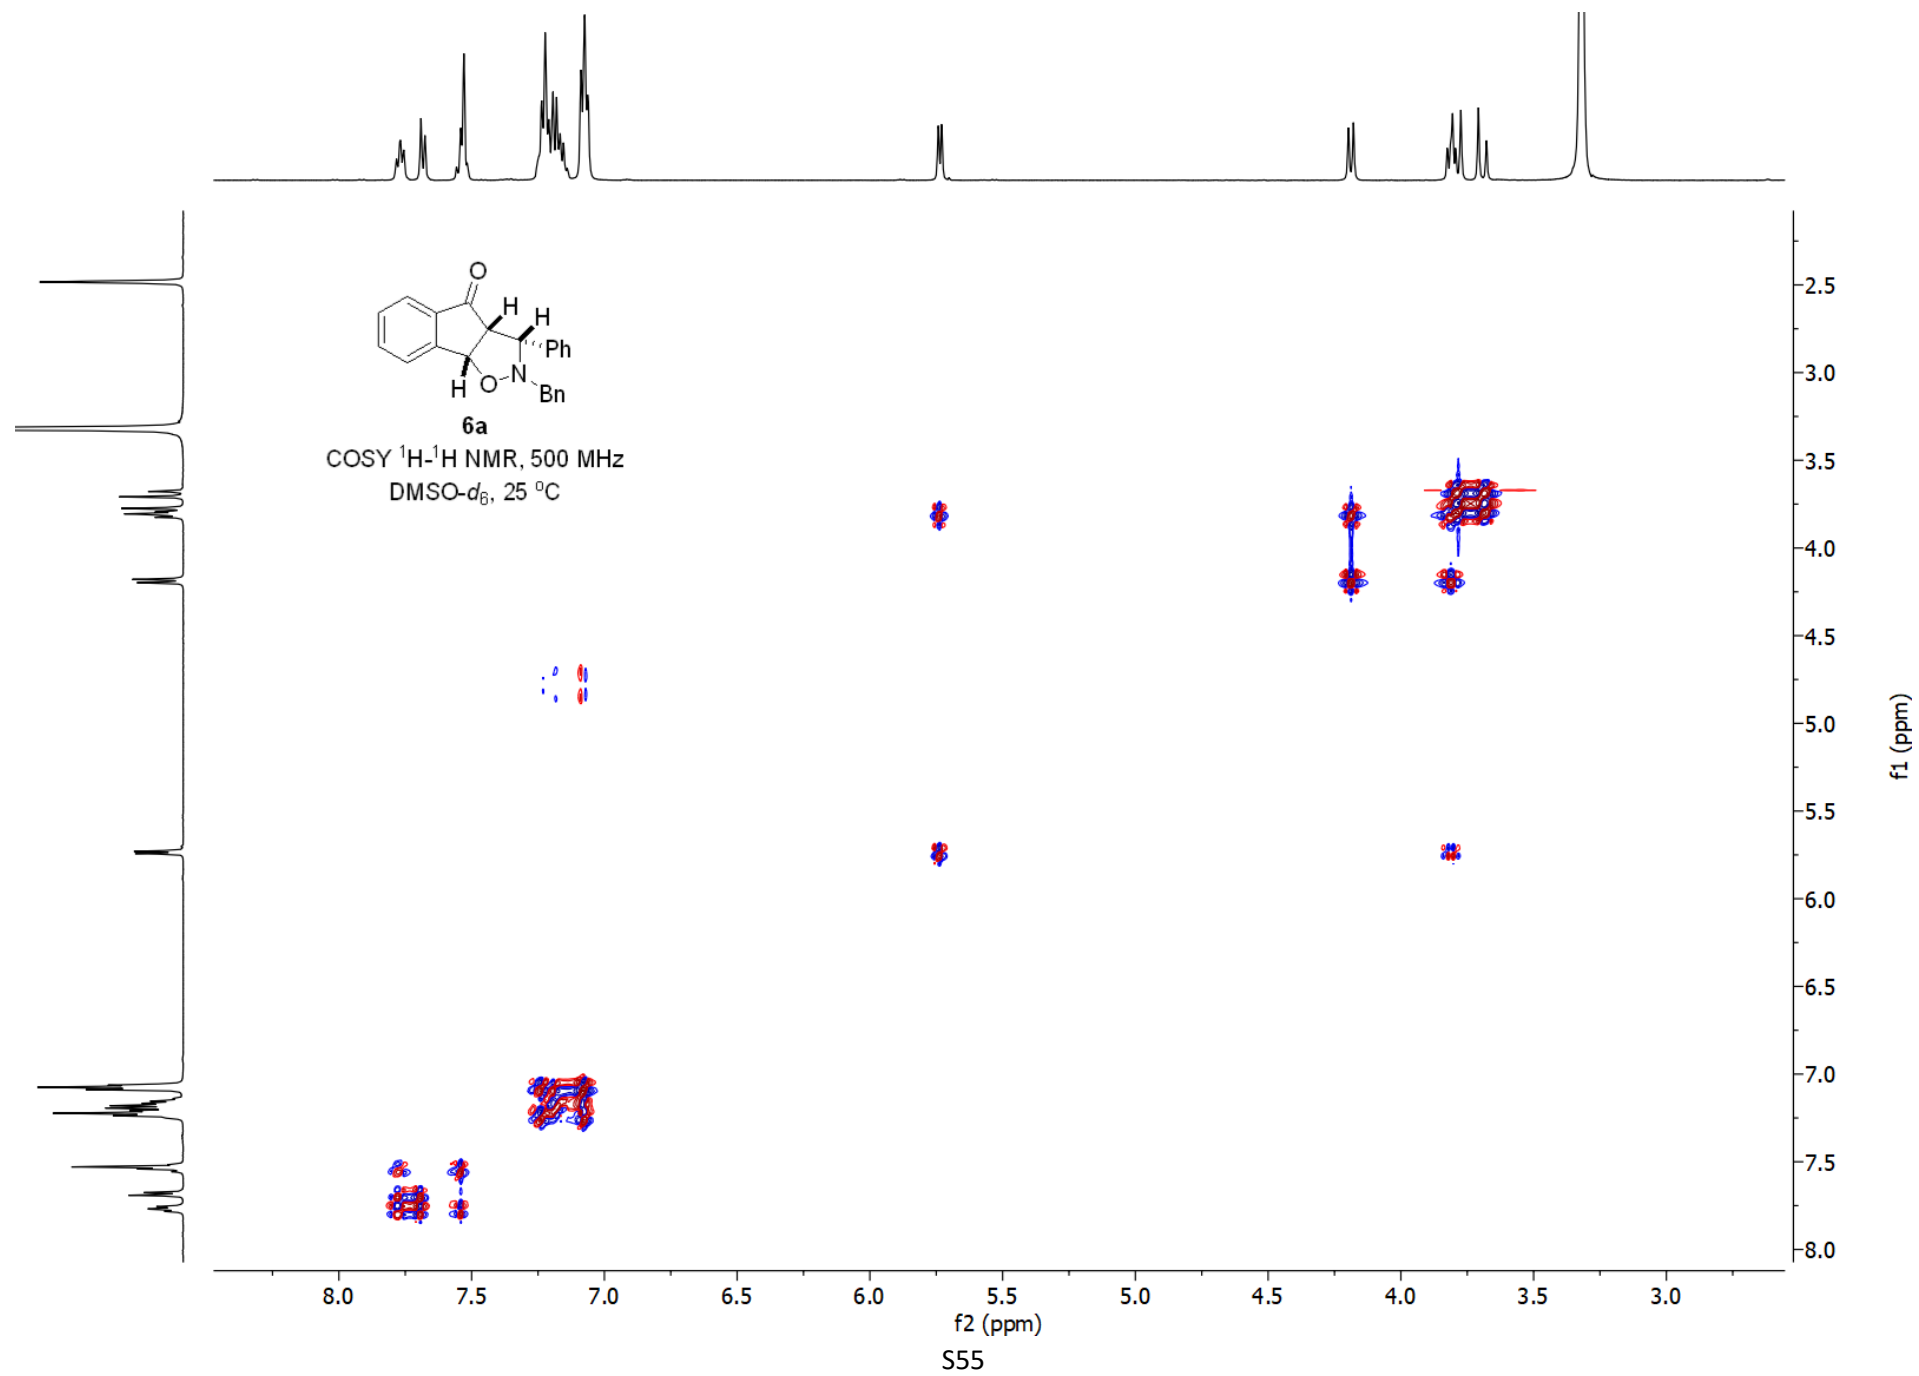

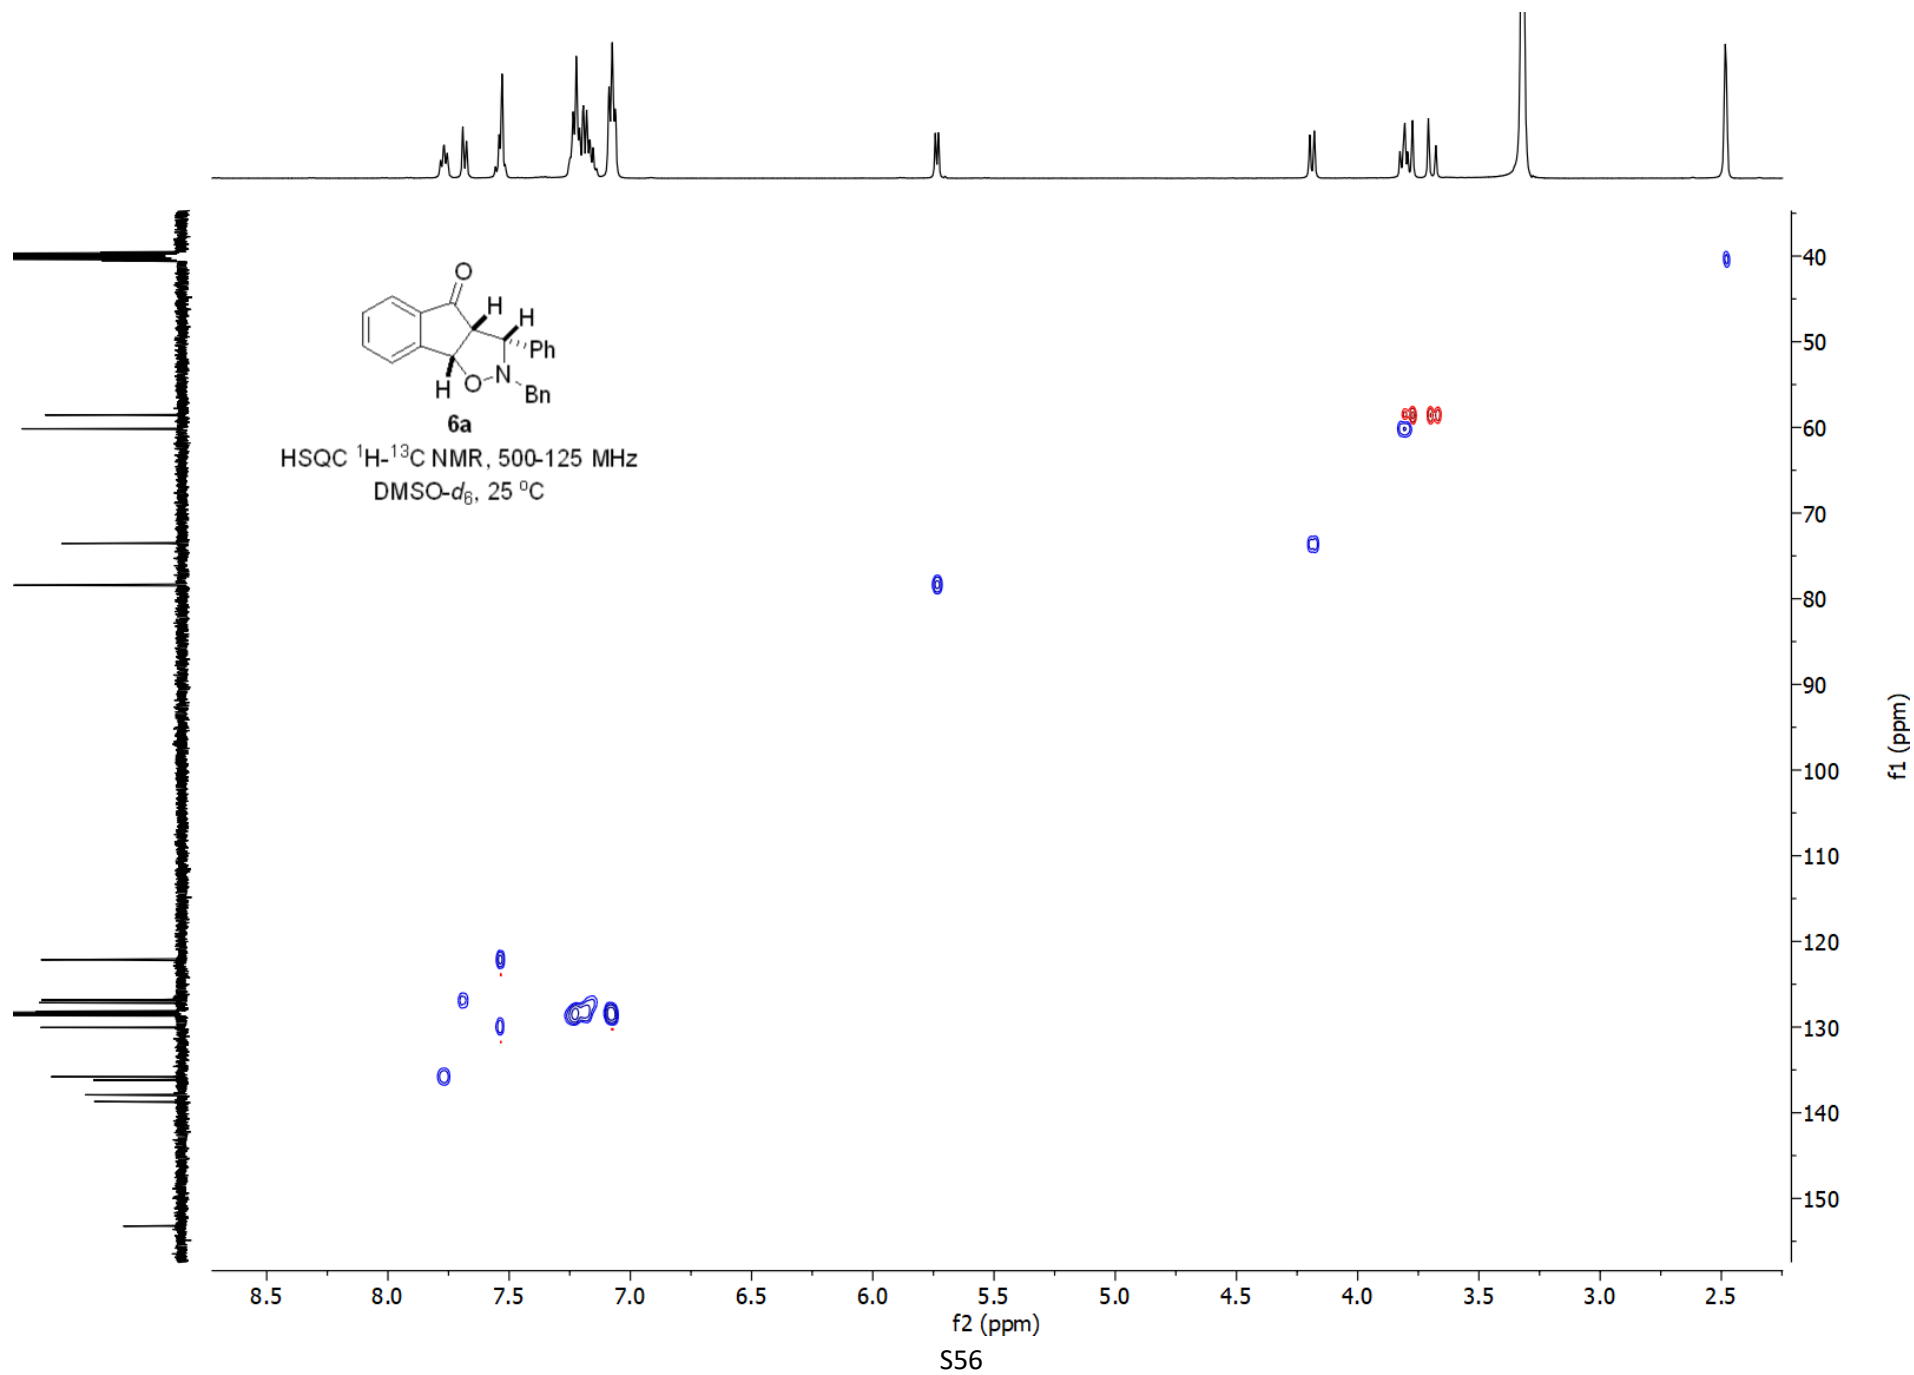

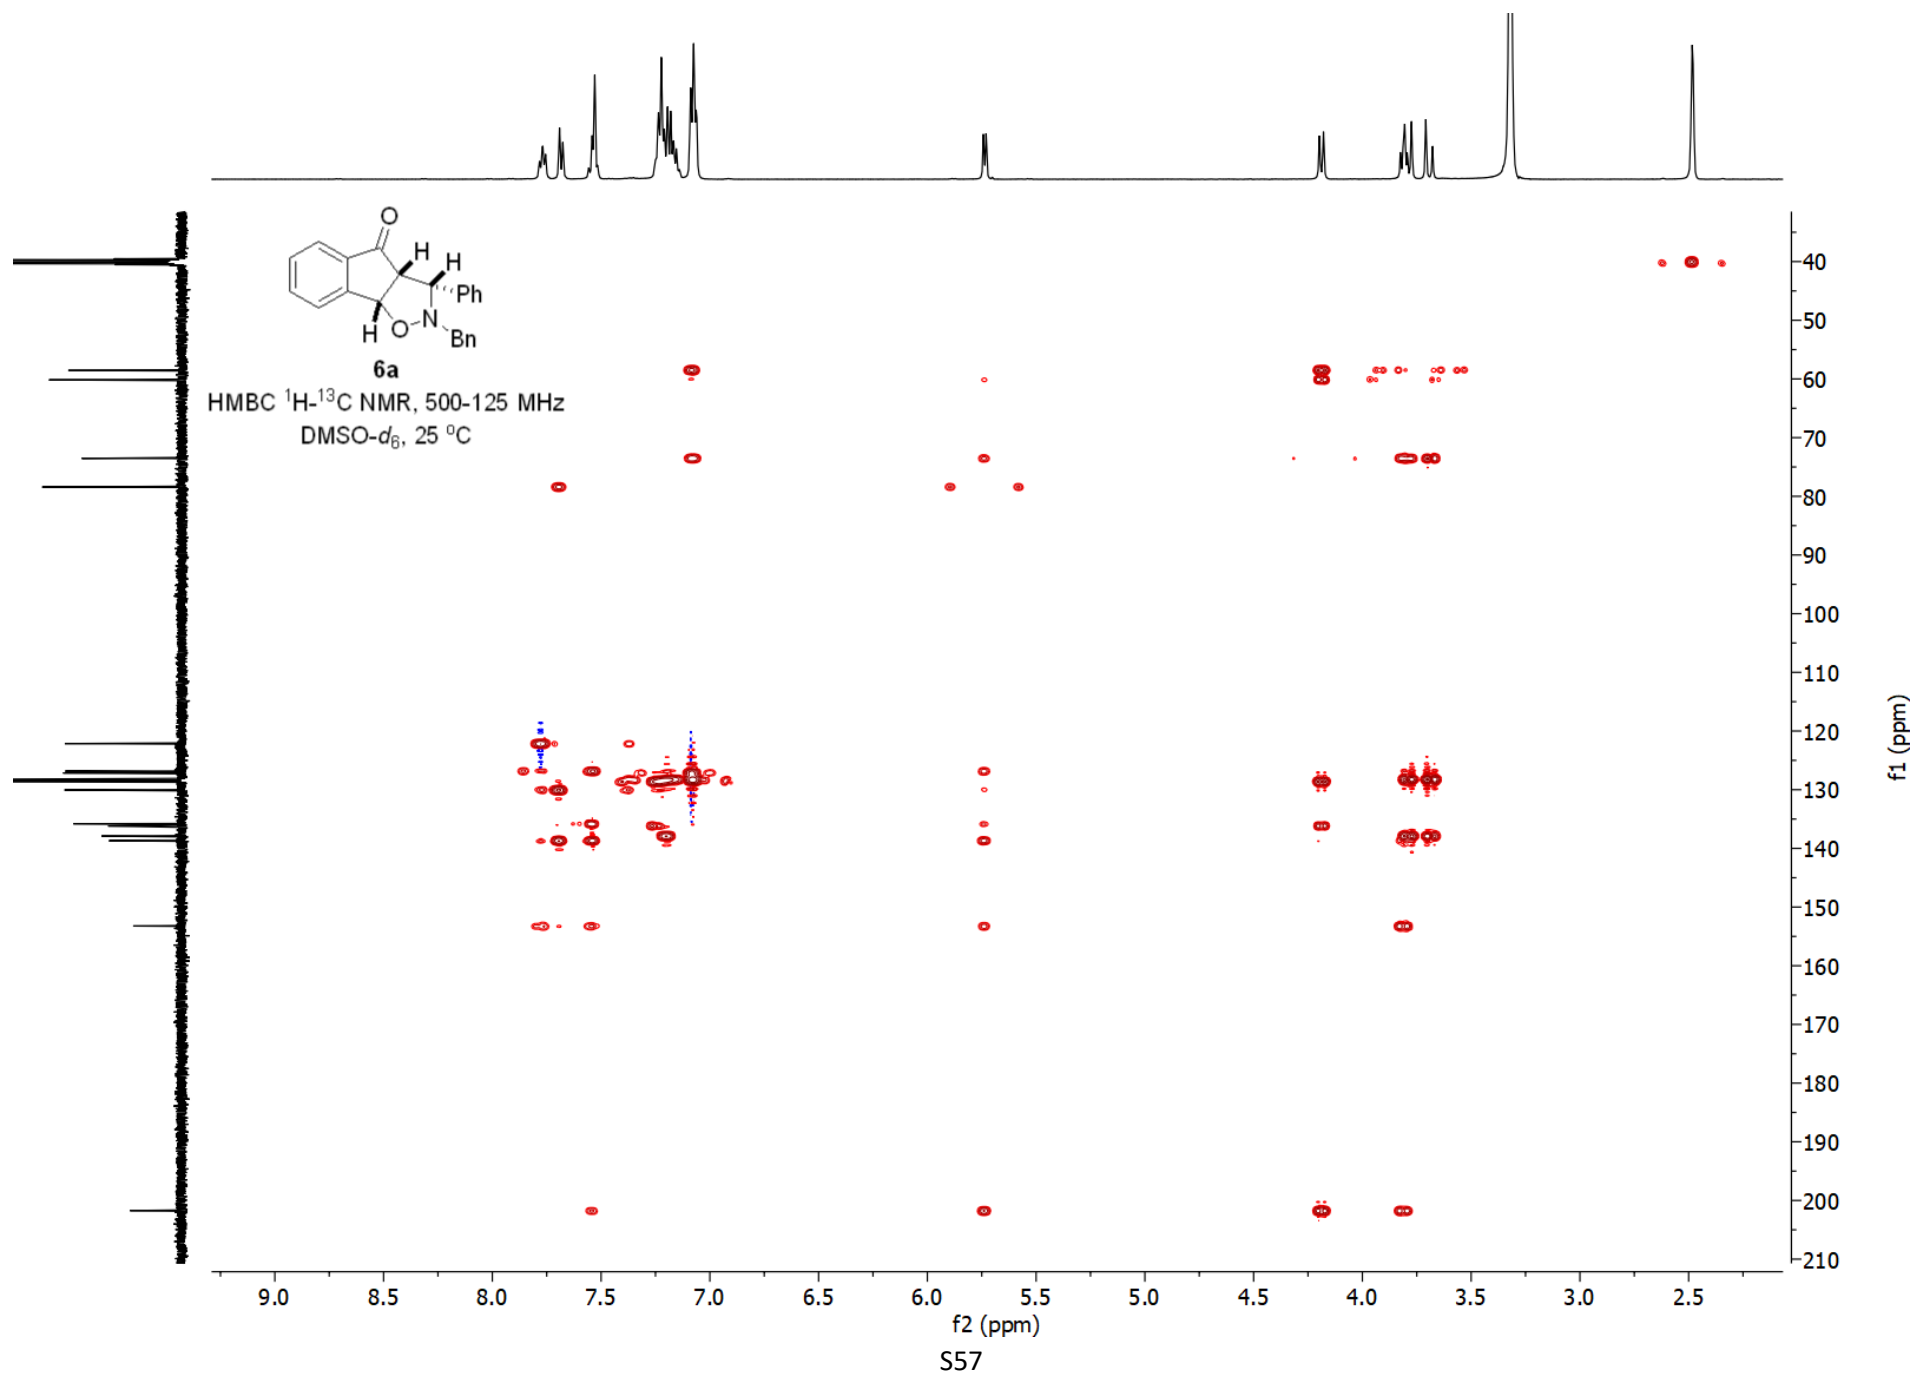

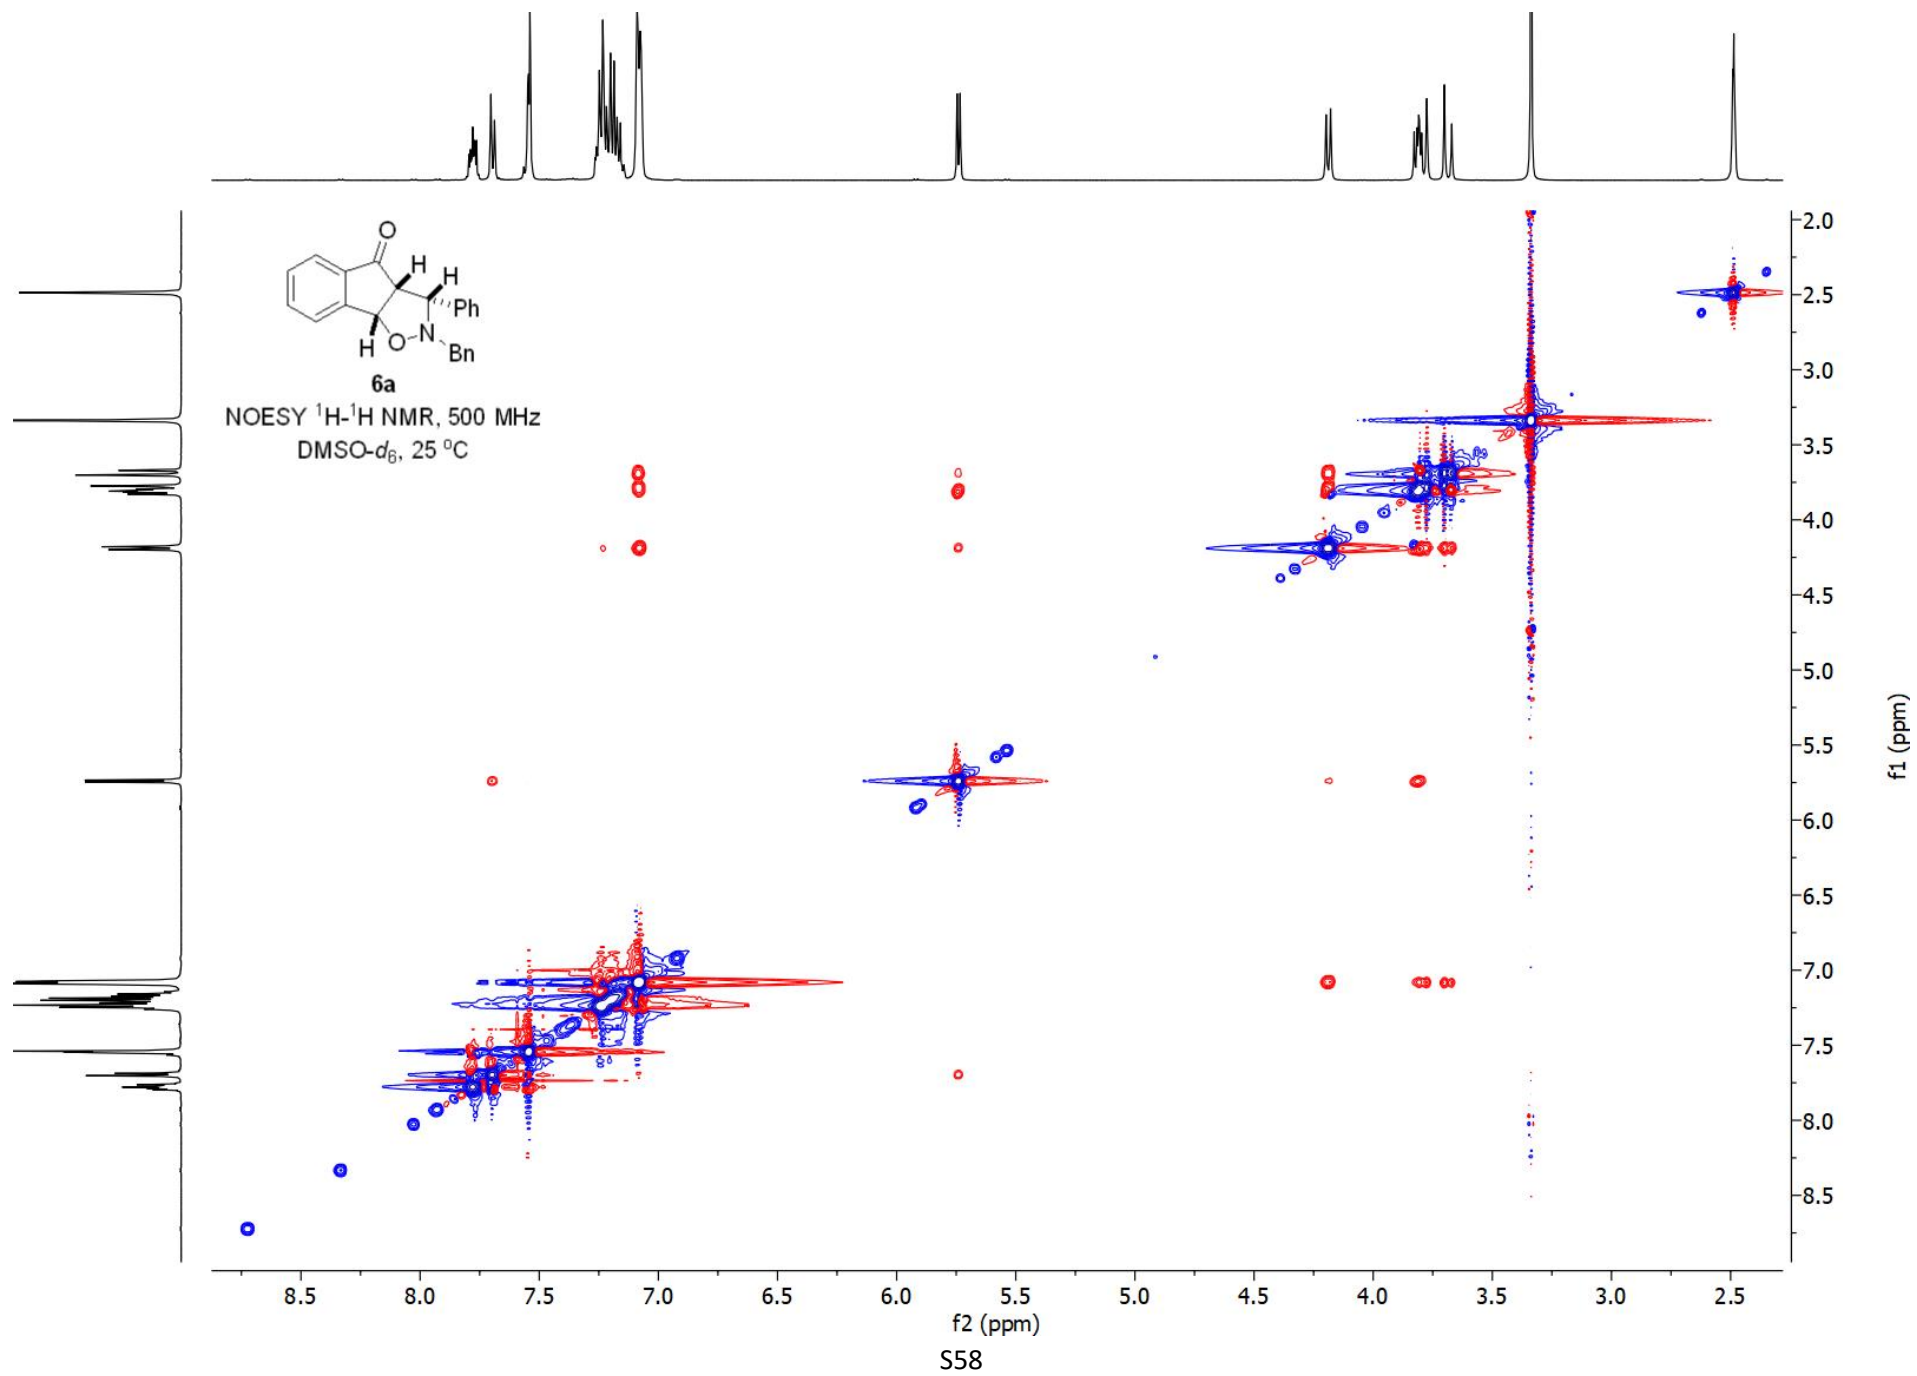

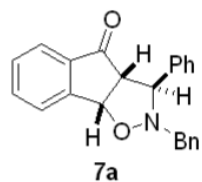

$^1\text{H}$  NMR, 500 MHz  
DMSO- $d_6$ , 60  $^\circ\text{C}$

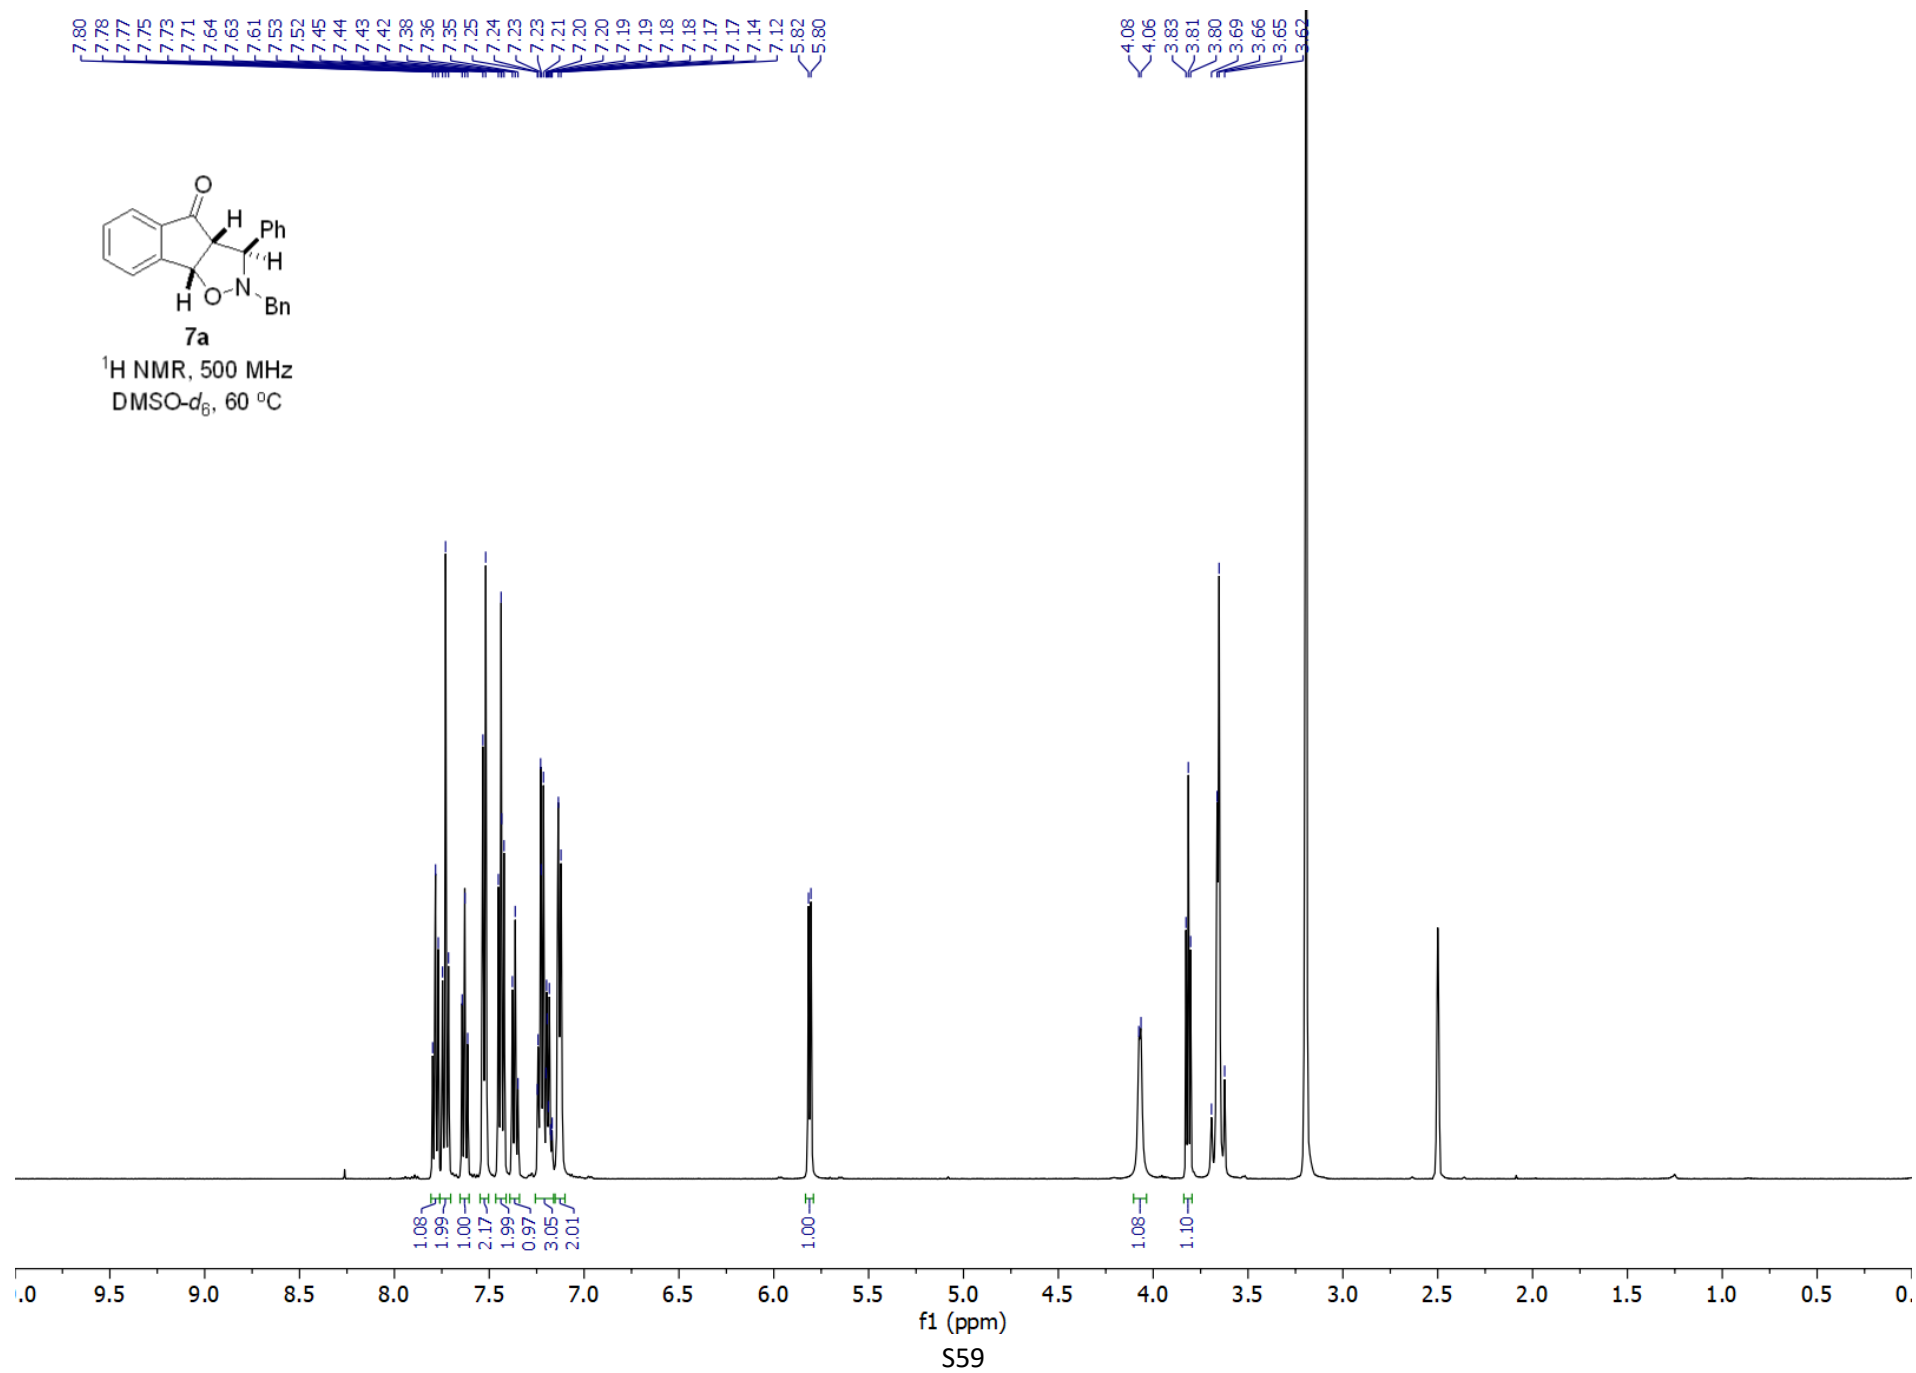

— 203.26

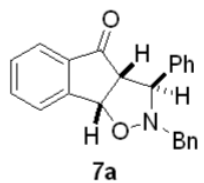

$^{13}\text{C}$  NMR, 125 MHz  
DMSO- $d_6$ , 60 °C

— 150.84

— 138.56

— 137.82

— 136.48

— 135.88

— 130.50

— 128.81

— 128.40

— 128.34

— 128.18

— 128.14

— 127.59

— 127.02

— 123.63

— 78.72

— 72.24

— 63.53

— 58.72

— 130.50

— 128.81

— 128.40

— 128.34

— 128.18

— 128.14

— 127.59

— 127.02

— 123.63

132 131 130 129 128 127 126 125 124 123  
f1 (ppm)

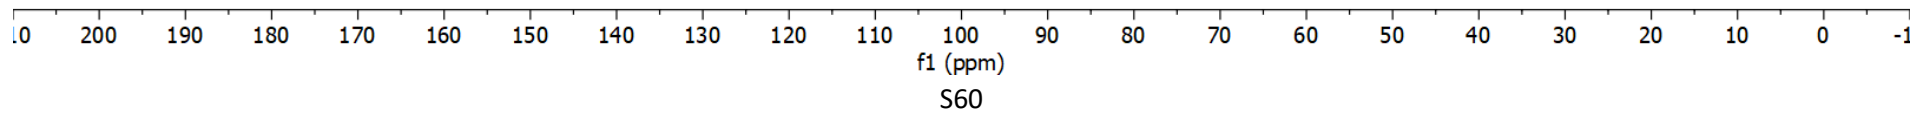

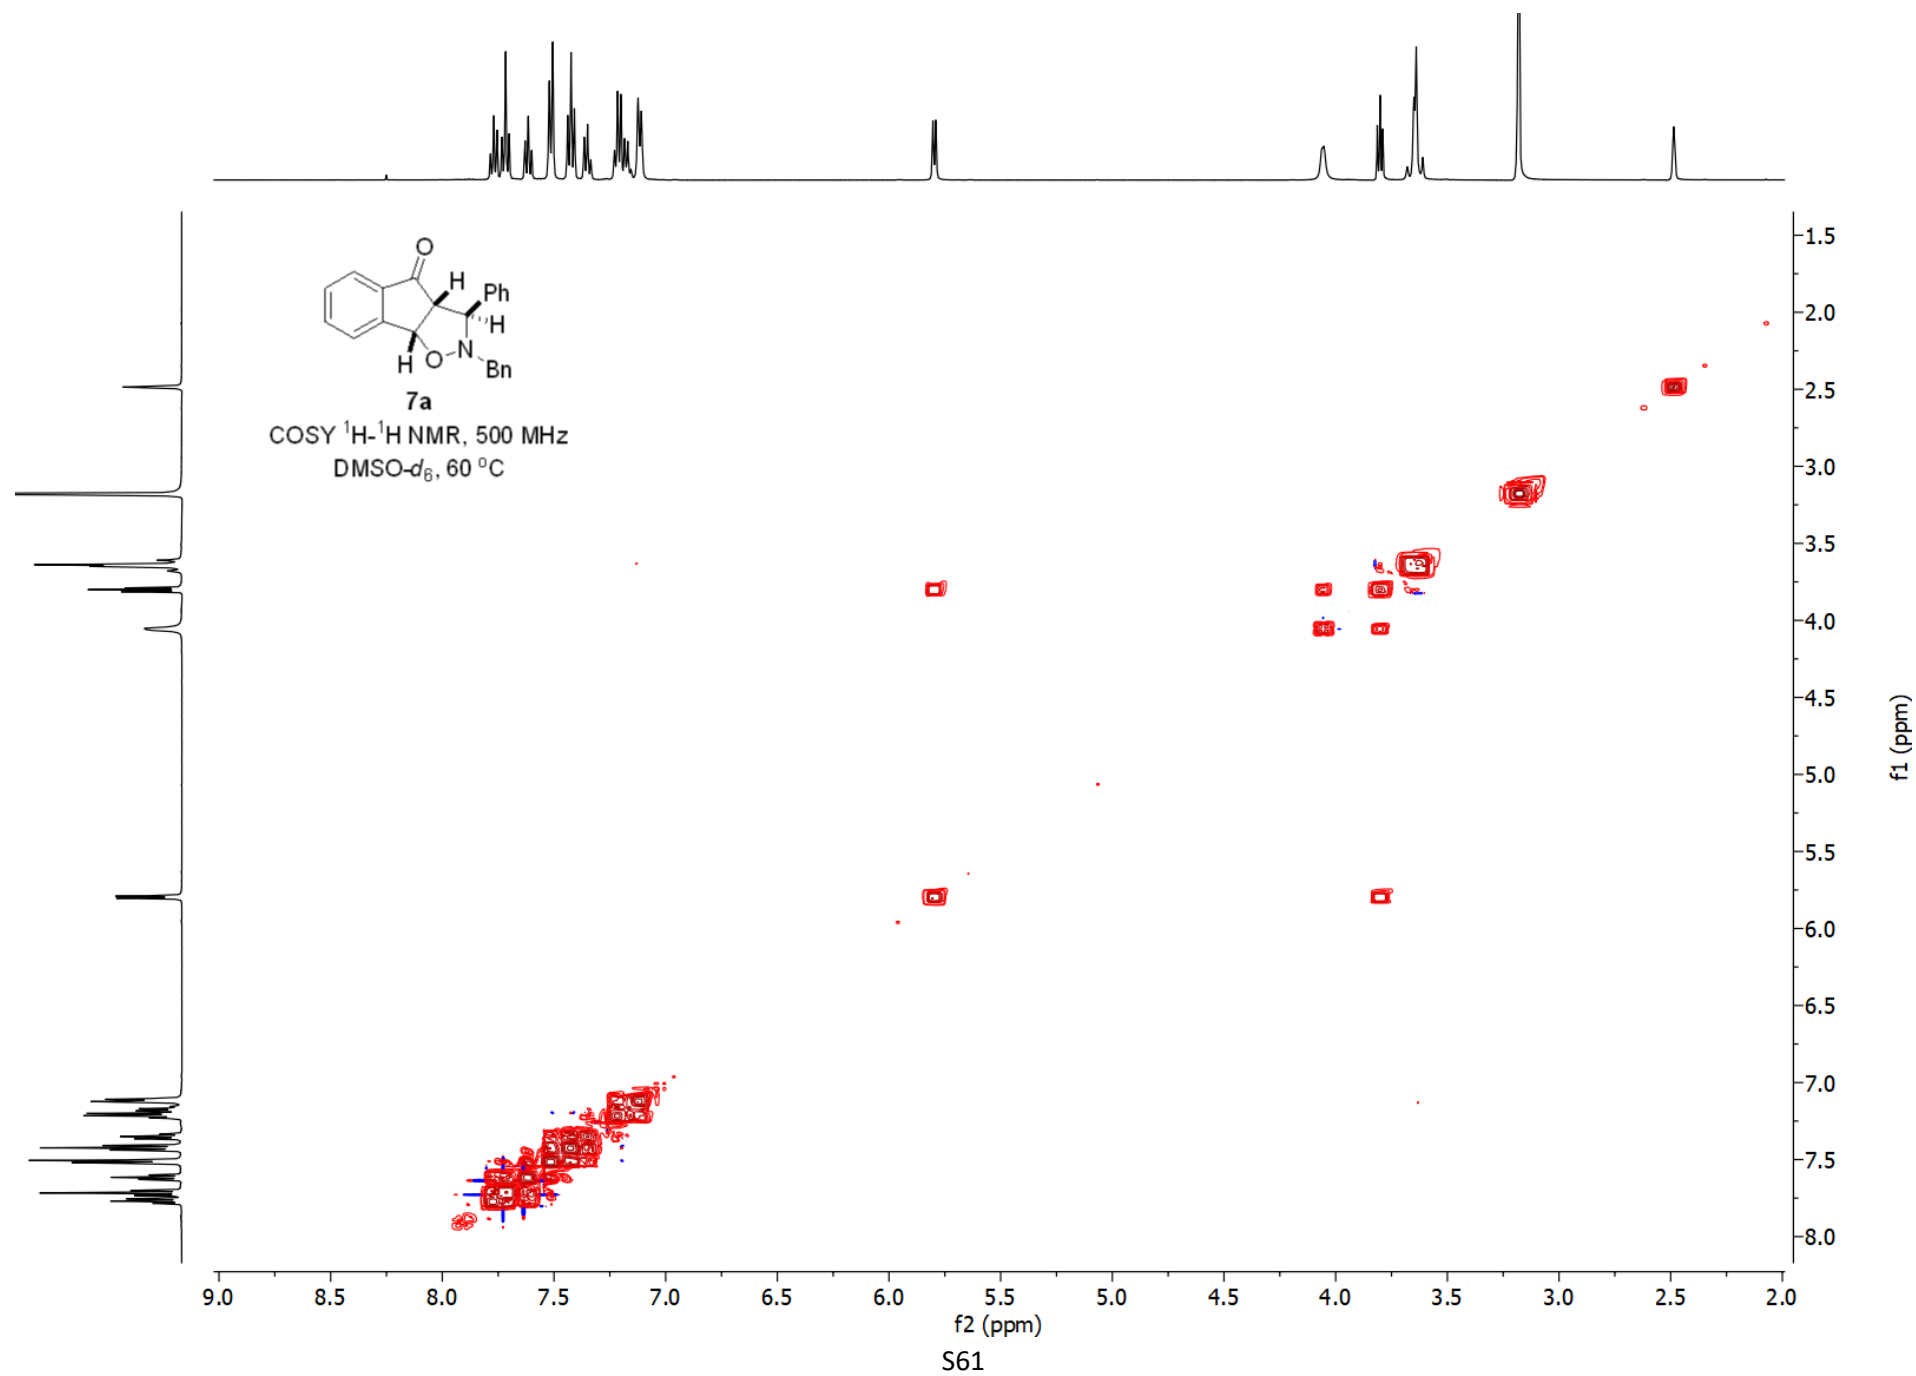

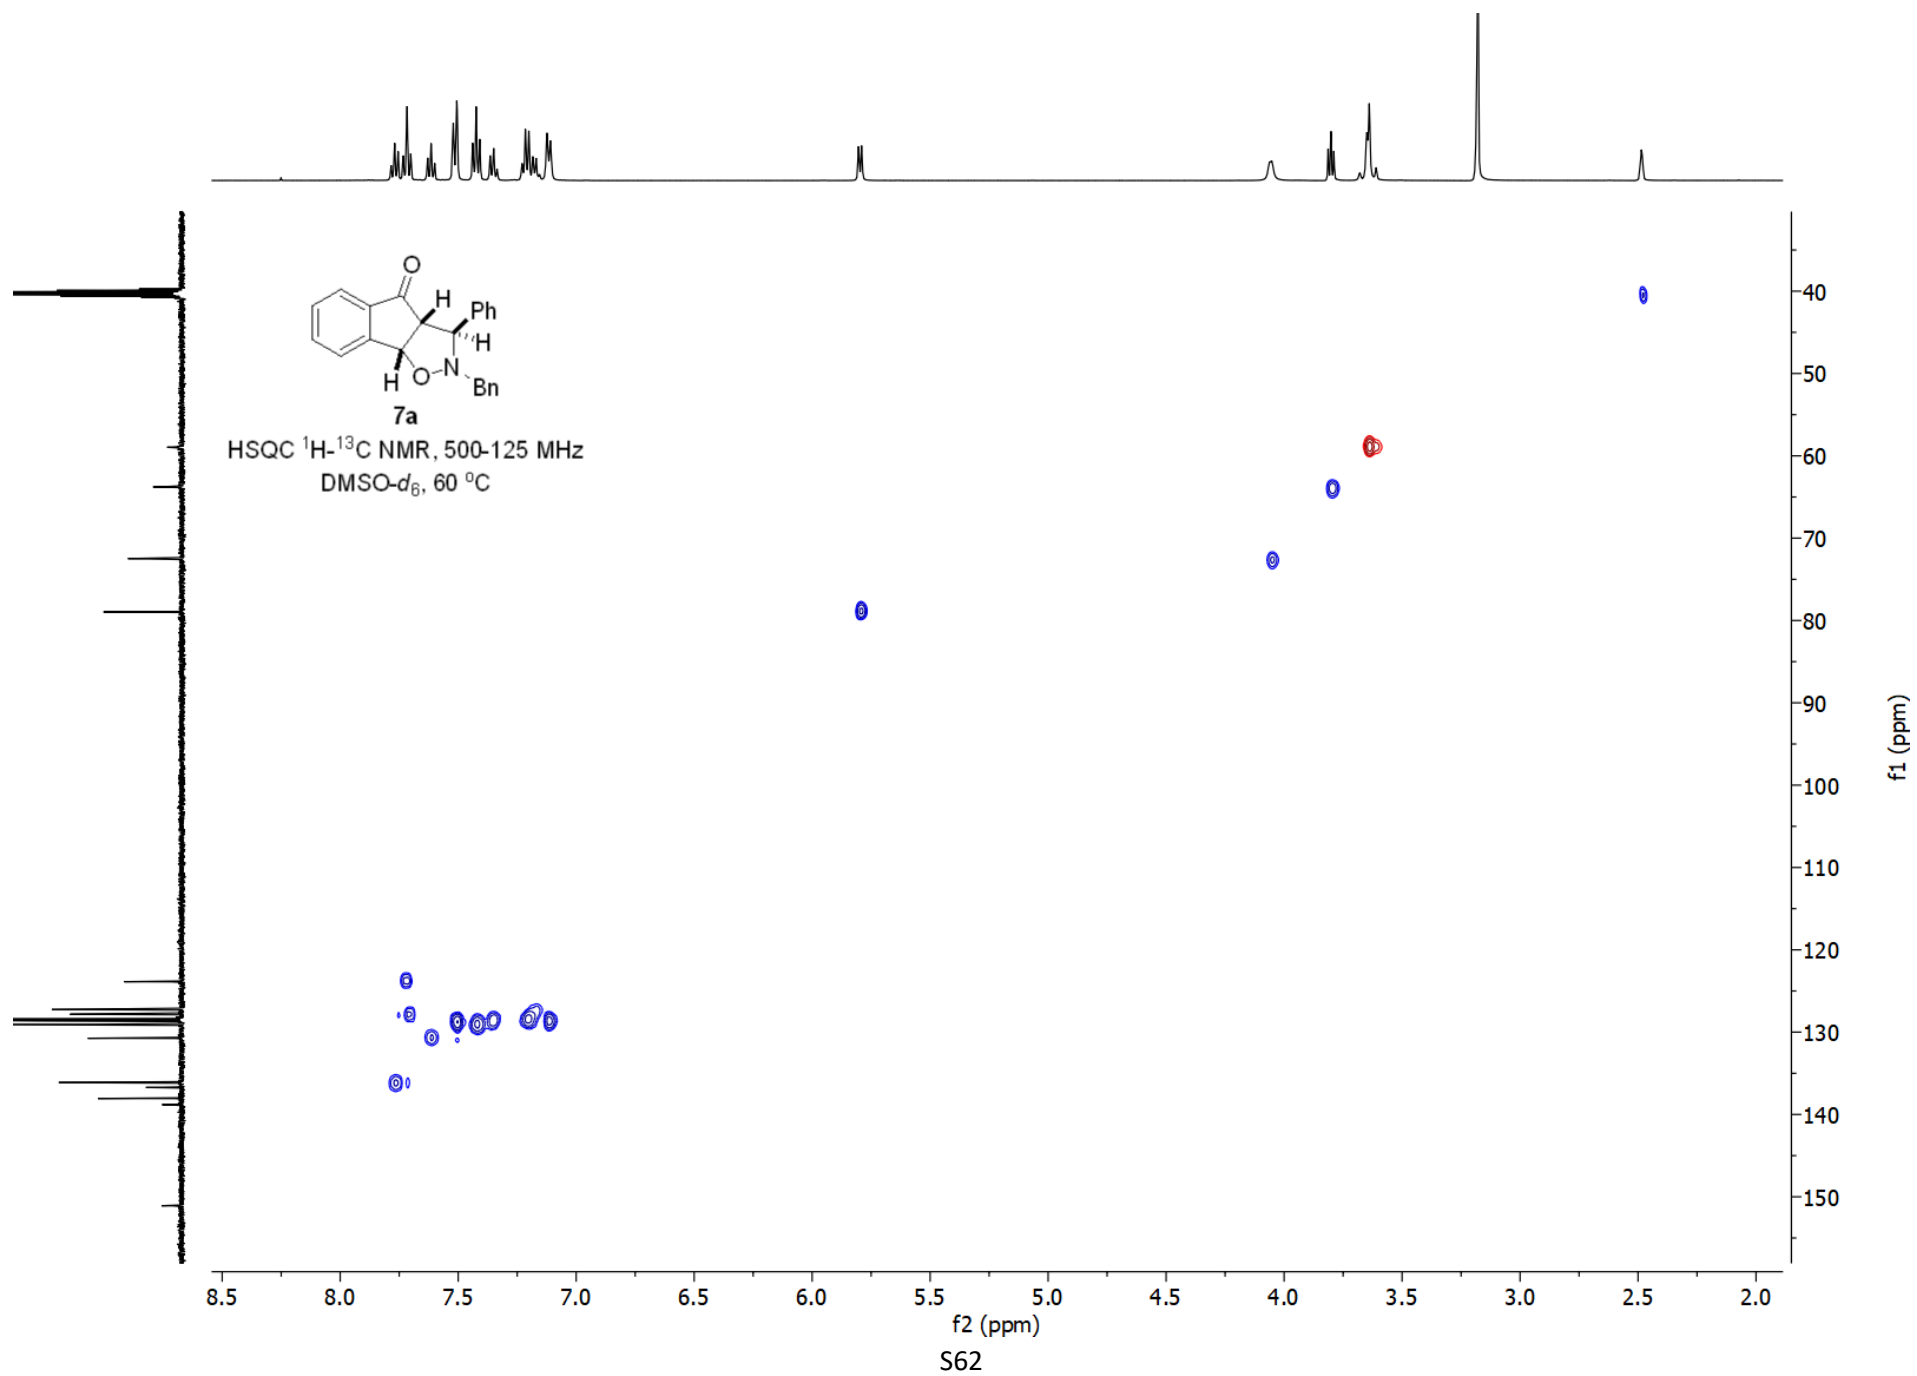

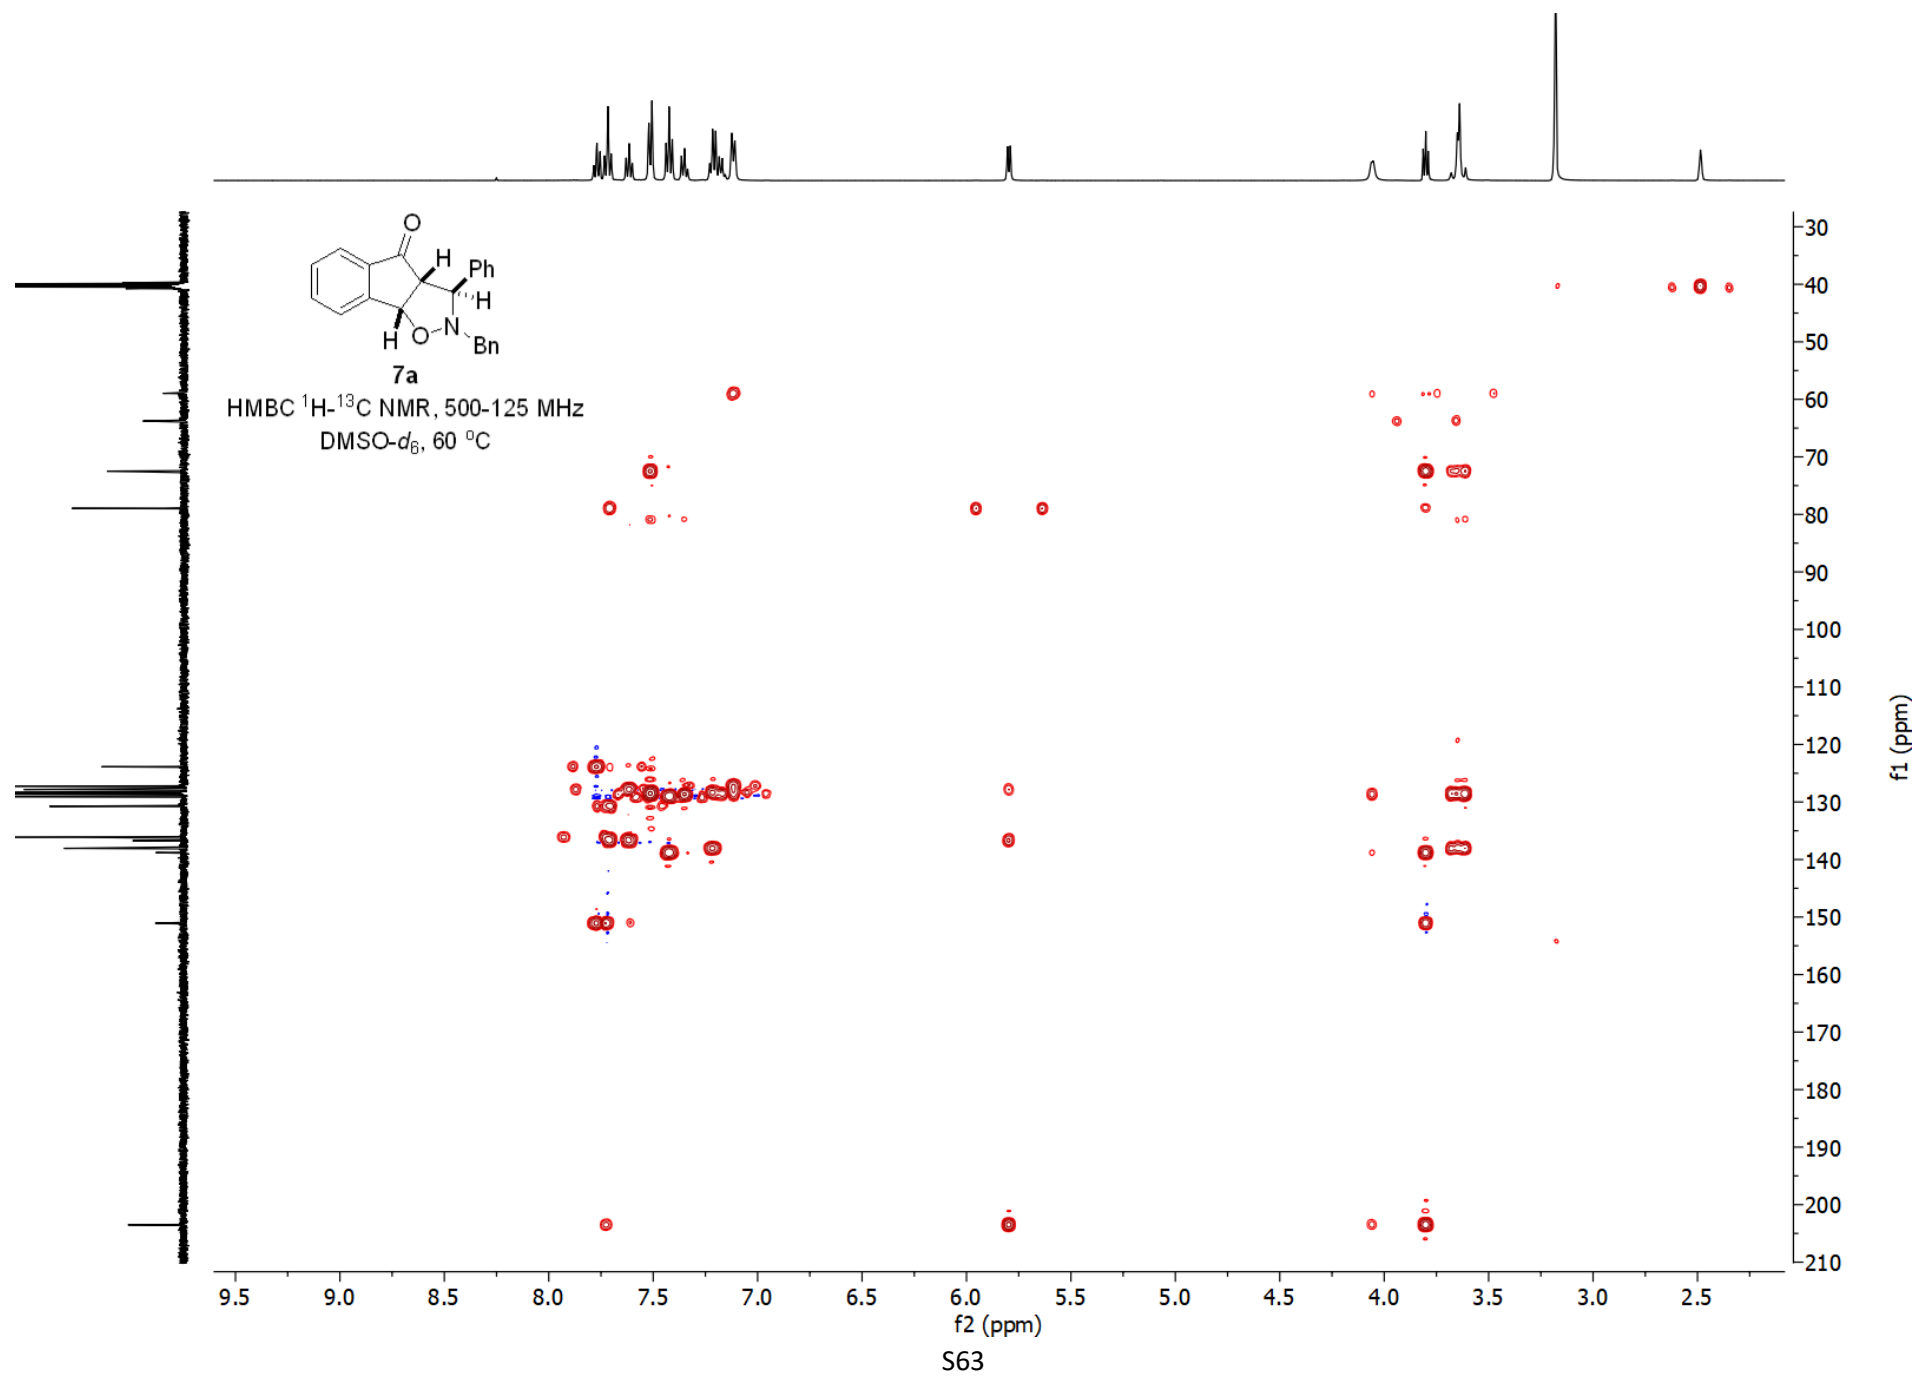

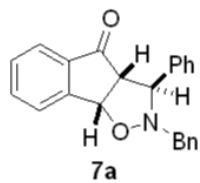

NOESY  $^1\text{H}$ - $^1\text{H}$  NMR, 500 MHz  
DMSO- $d_6$ , 60  $^\circ\text{C}$

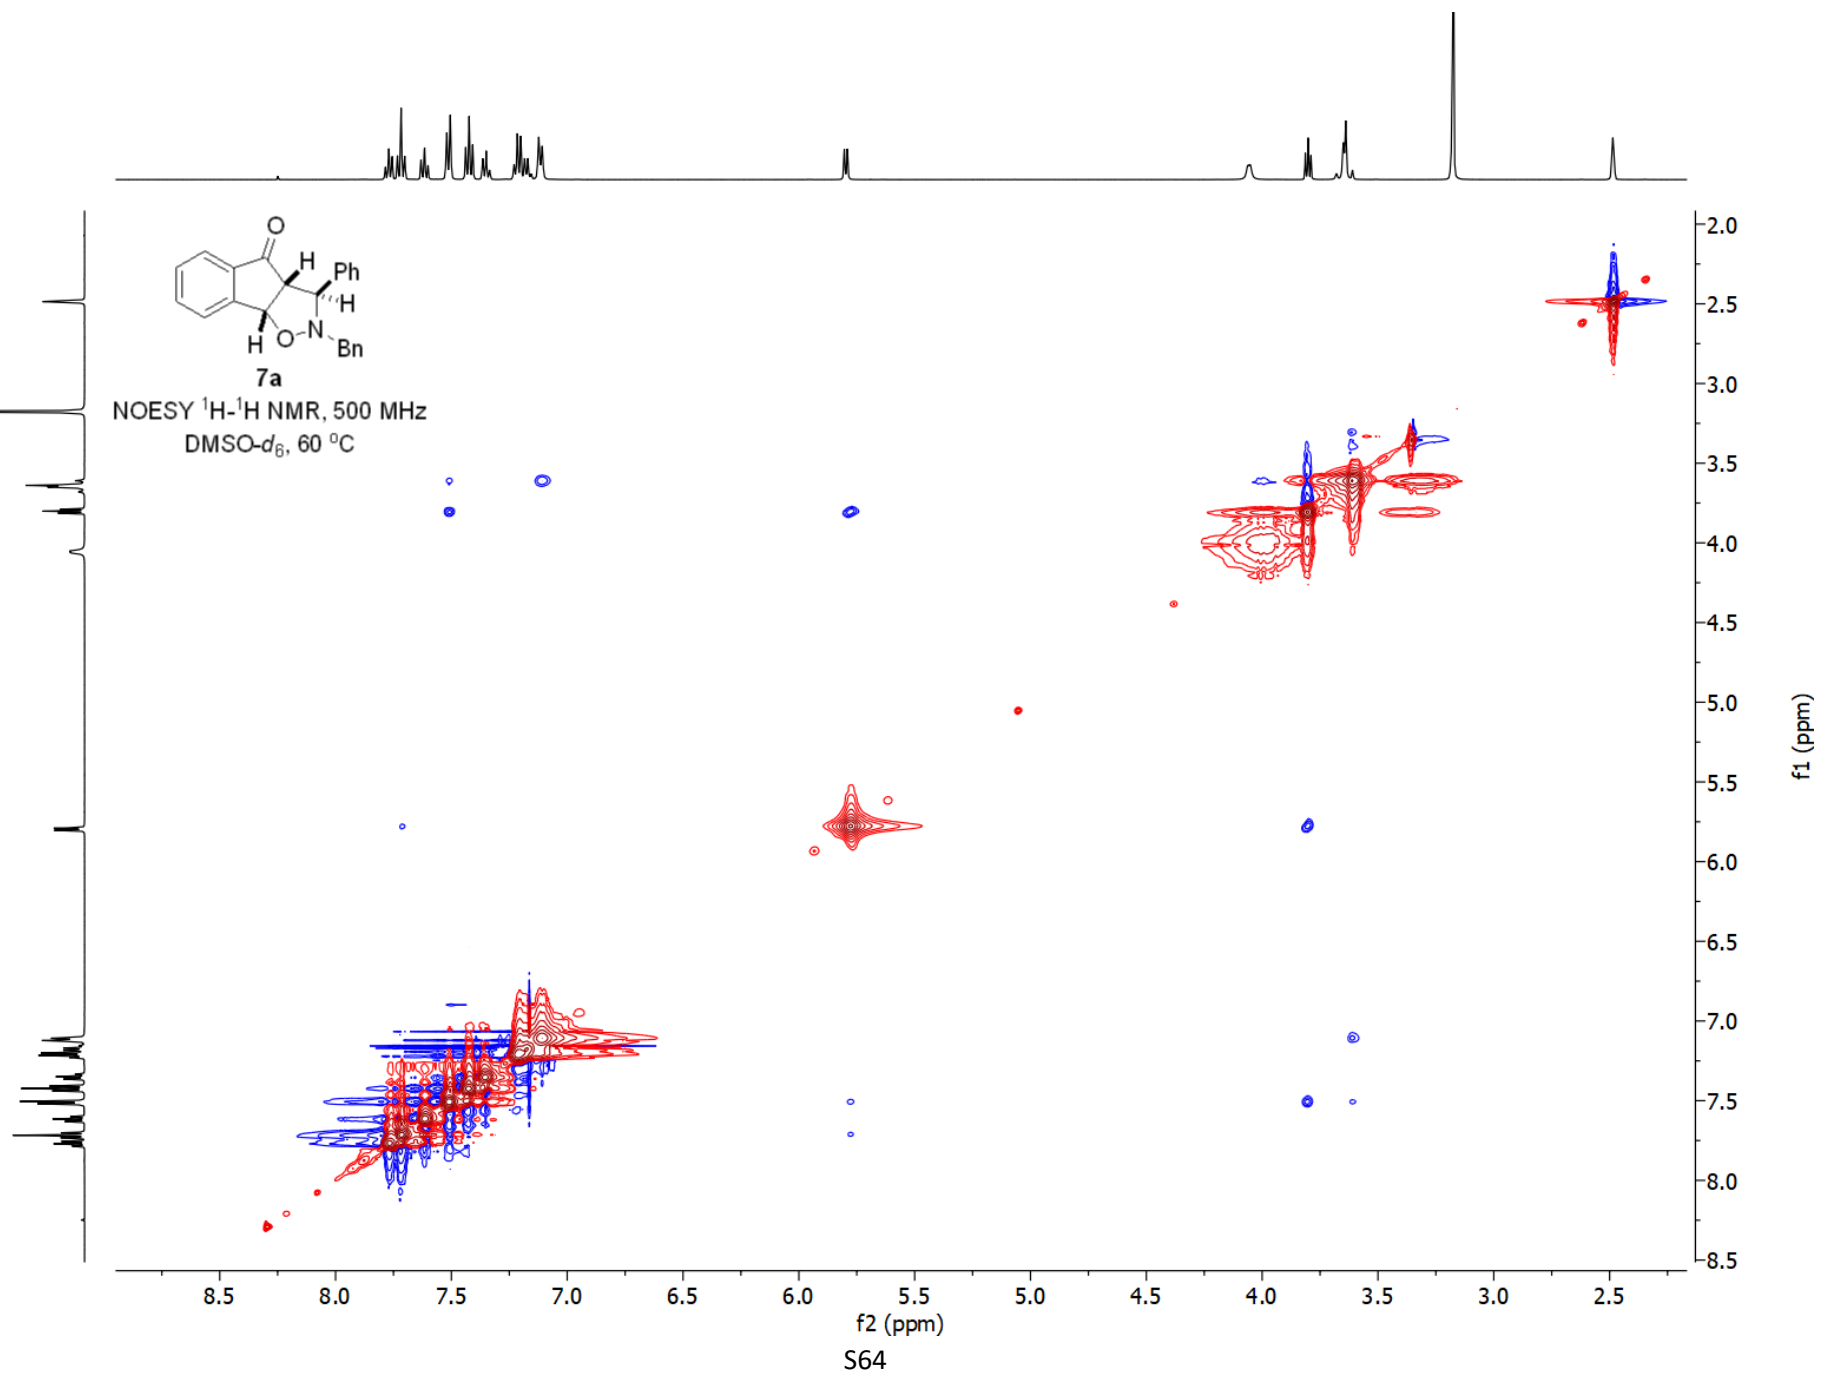

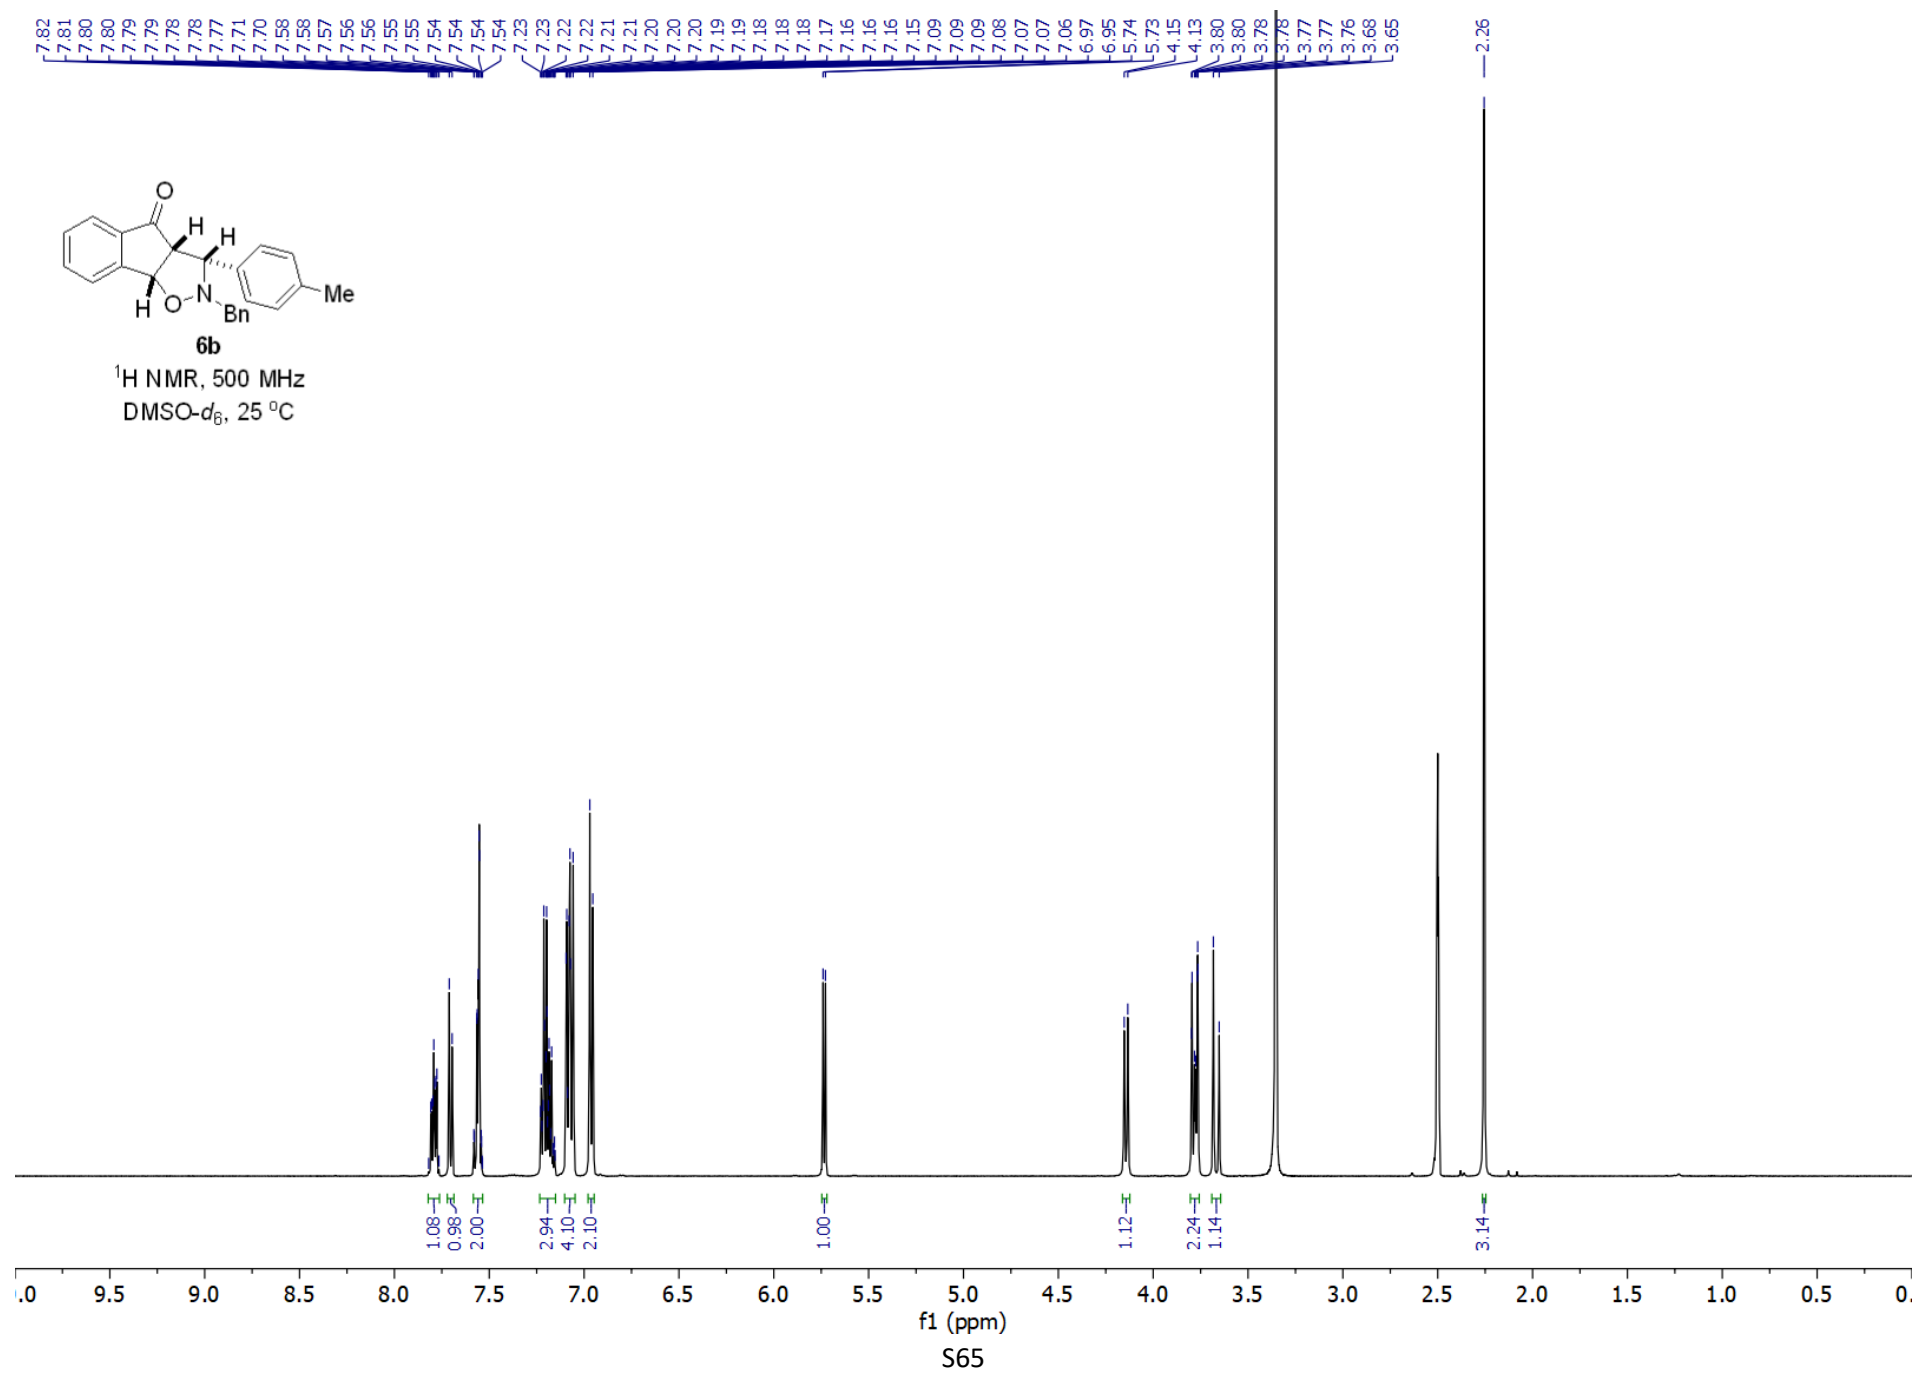

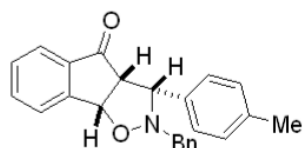

**6b**

$^{13}\text{C}$  NMR, 125 MHz  
DMSO- $d_6$ , 25 °C

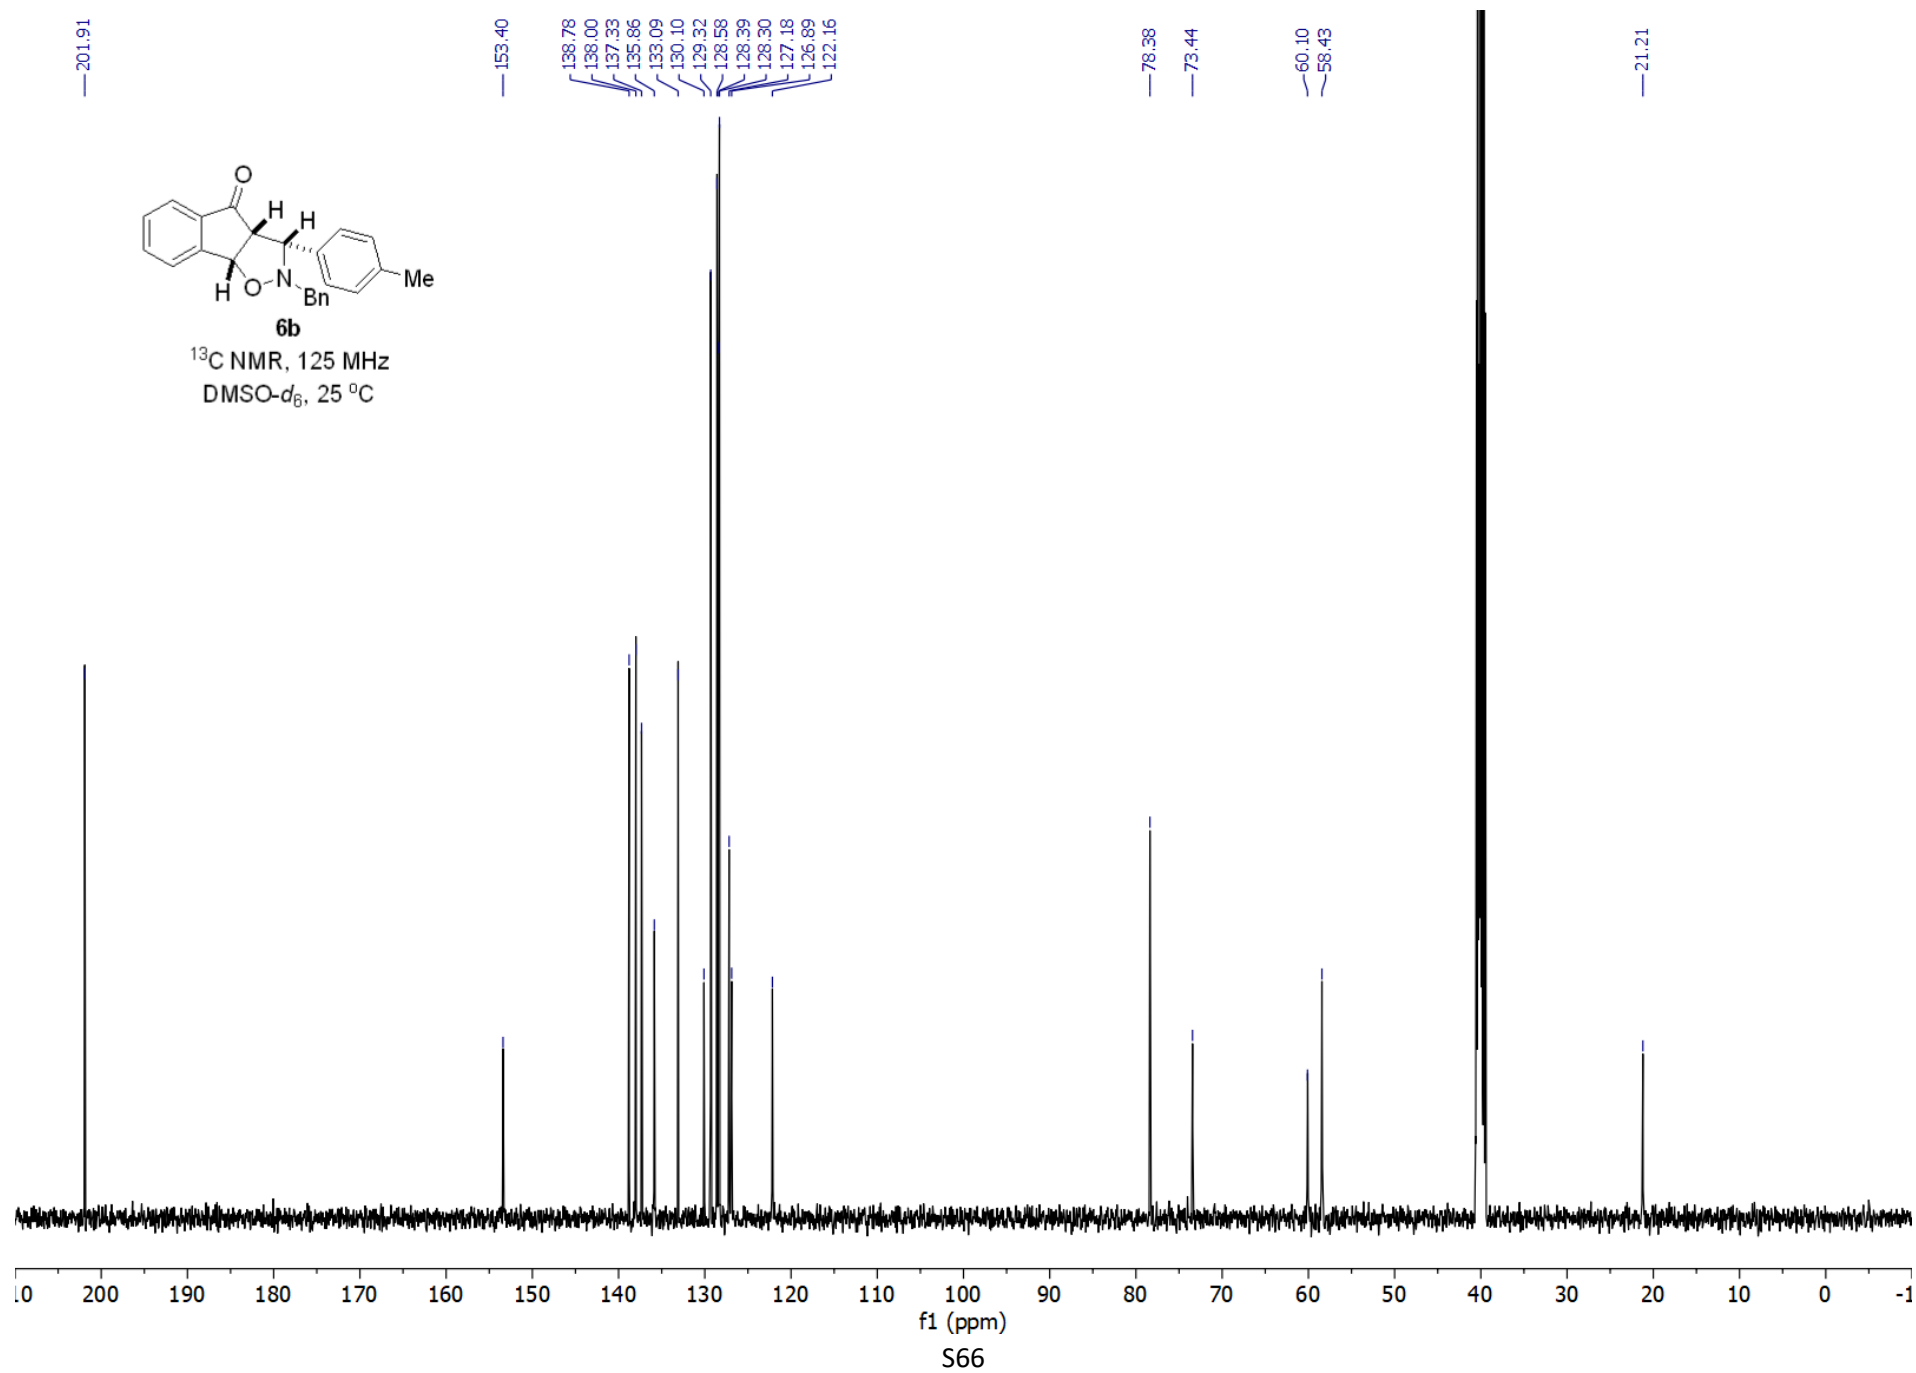

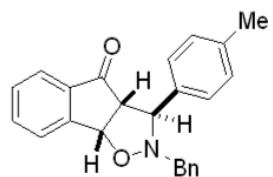

**7b**

$^1\text{H}$  NMR, 500 MHz  
DMSO- $d_6$ , 60  $^\circ\text{C}$

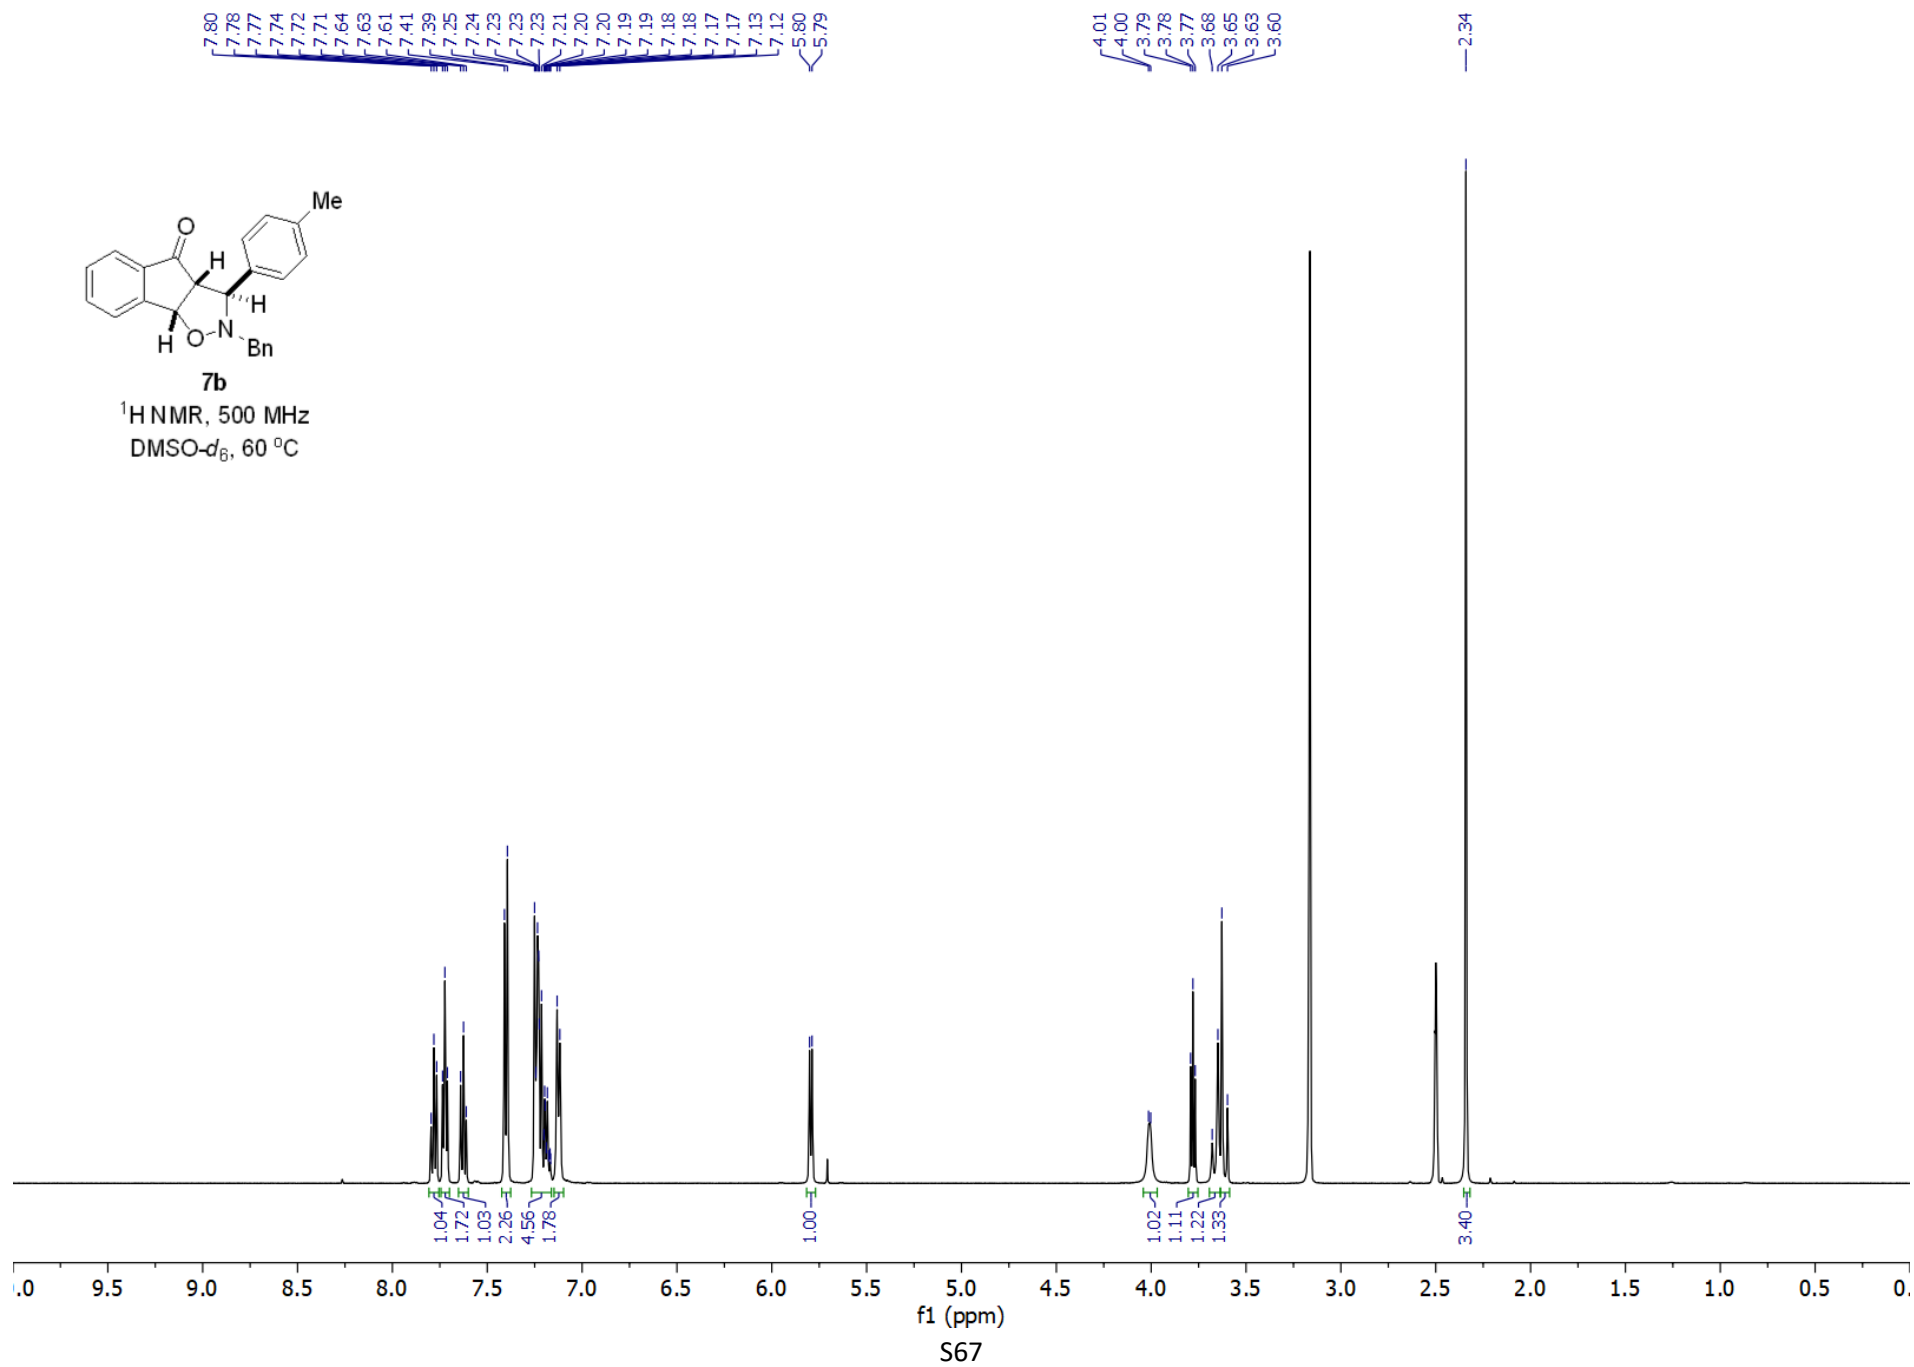

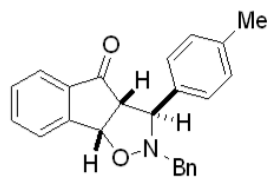

**7b**

$^{13}\text{C}$  NMR, 125 MHz  
DMSO- $d_6$ , 60 °C

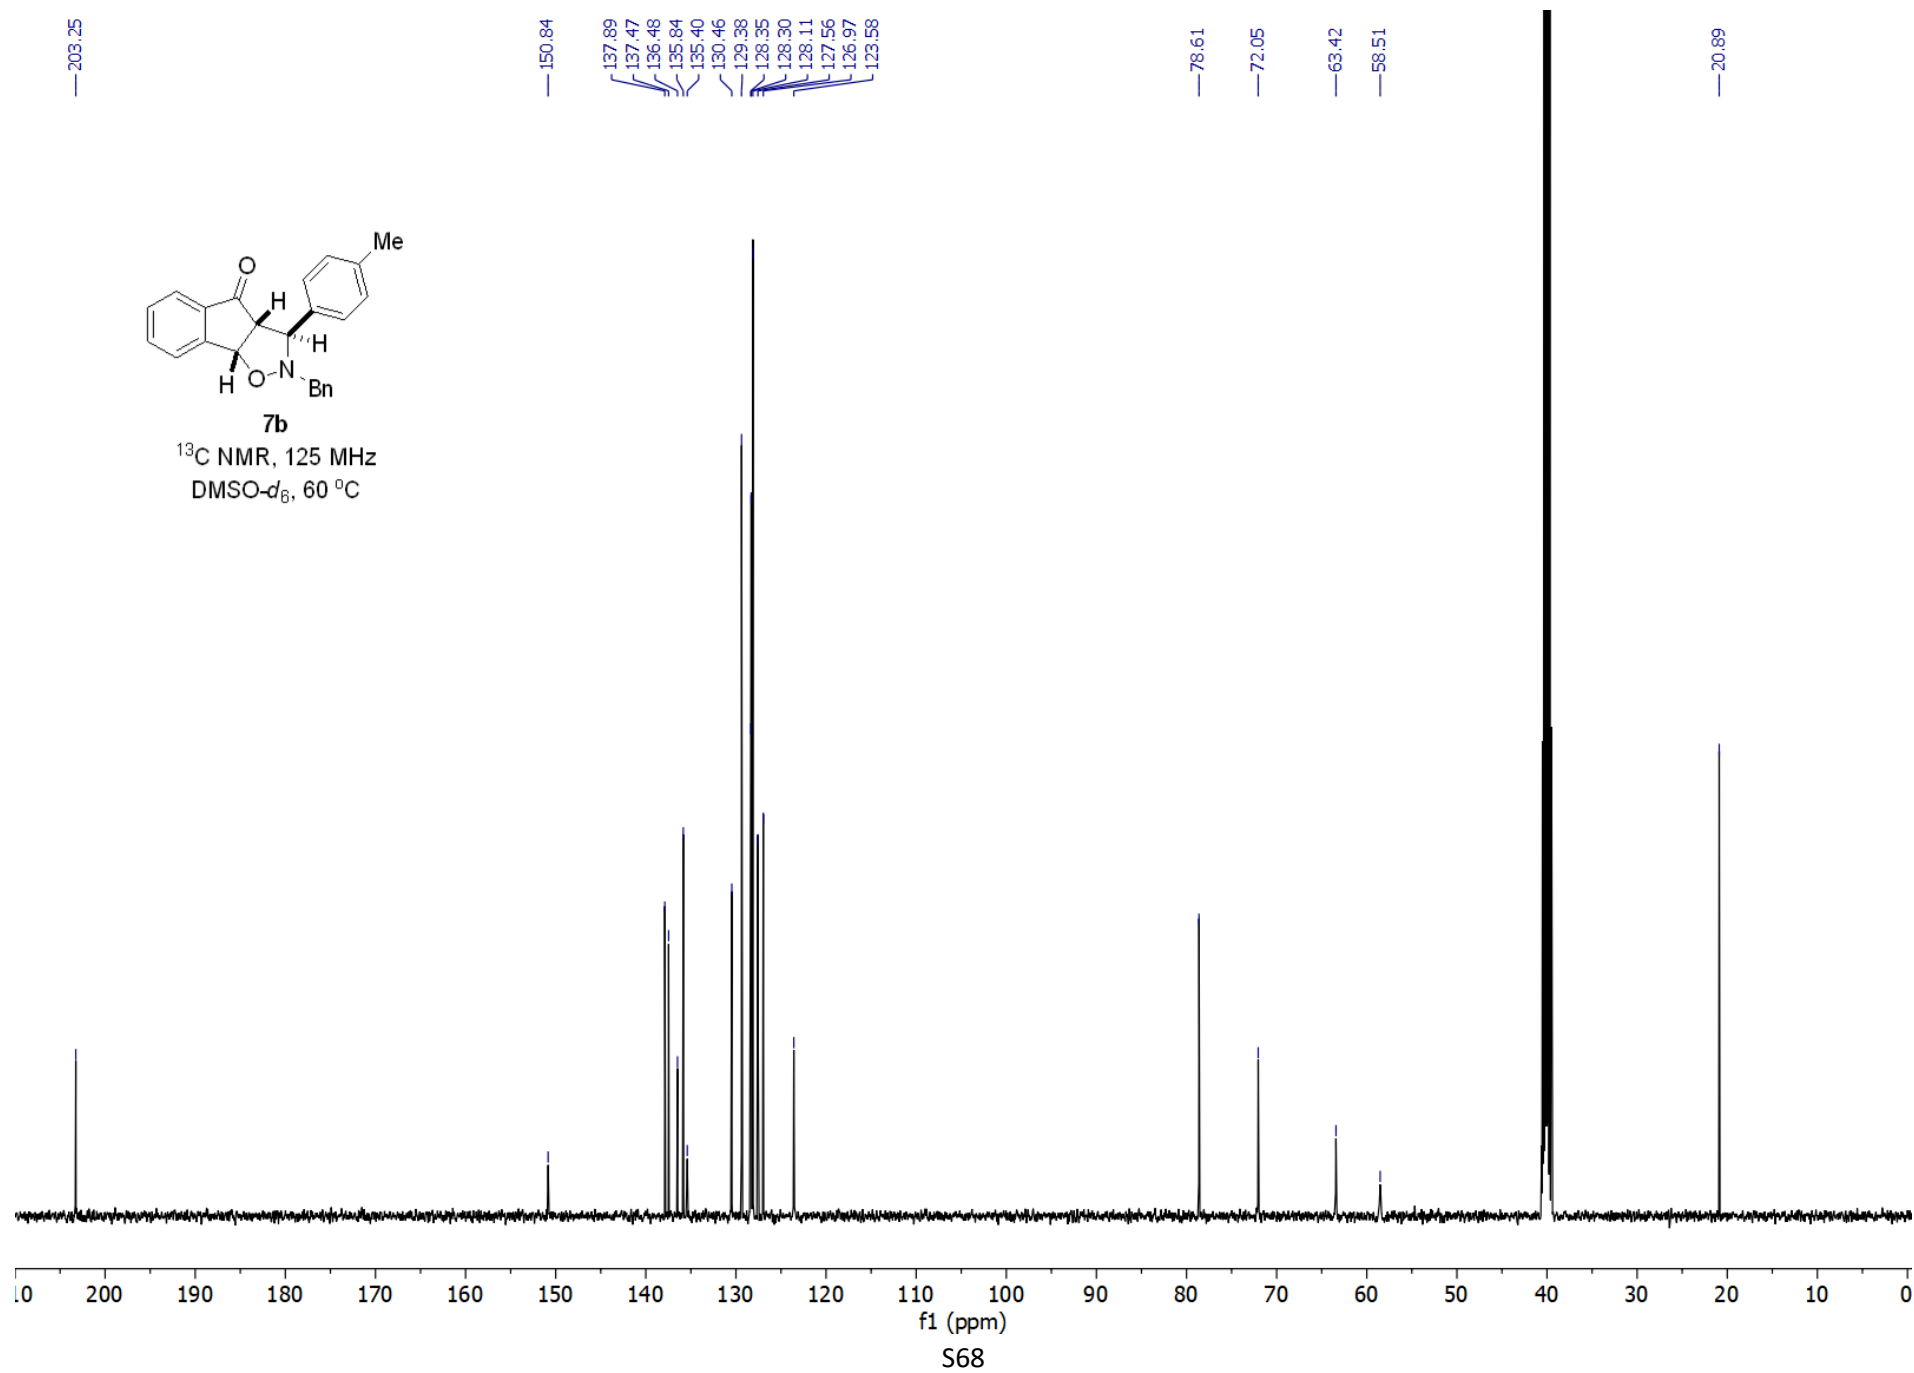

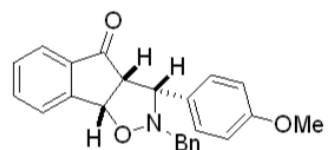

**6c**

$^1\text{H}$  NMR, 500 MHz

$\text{DMSO-}d_6$ , 25  $^\circ\text{C}$

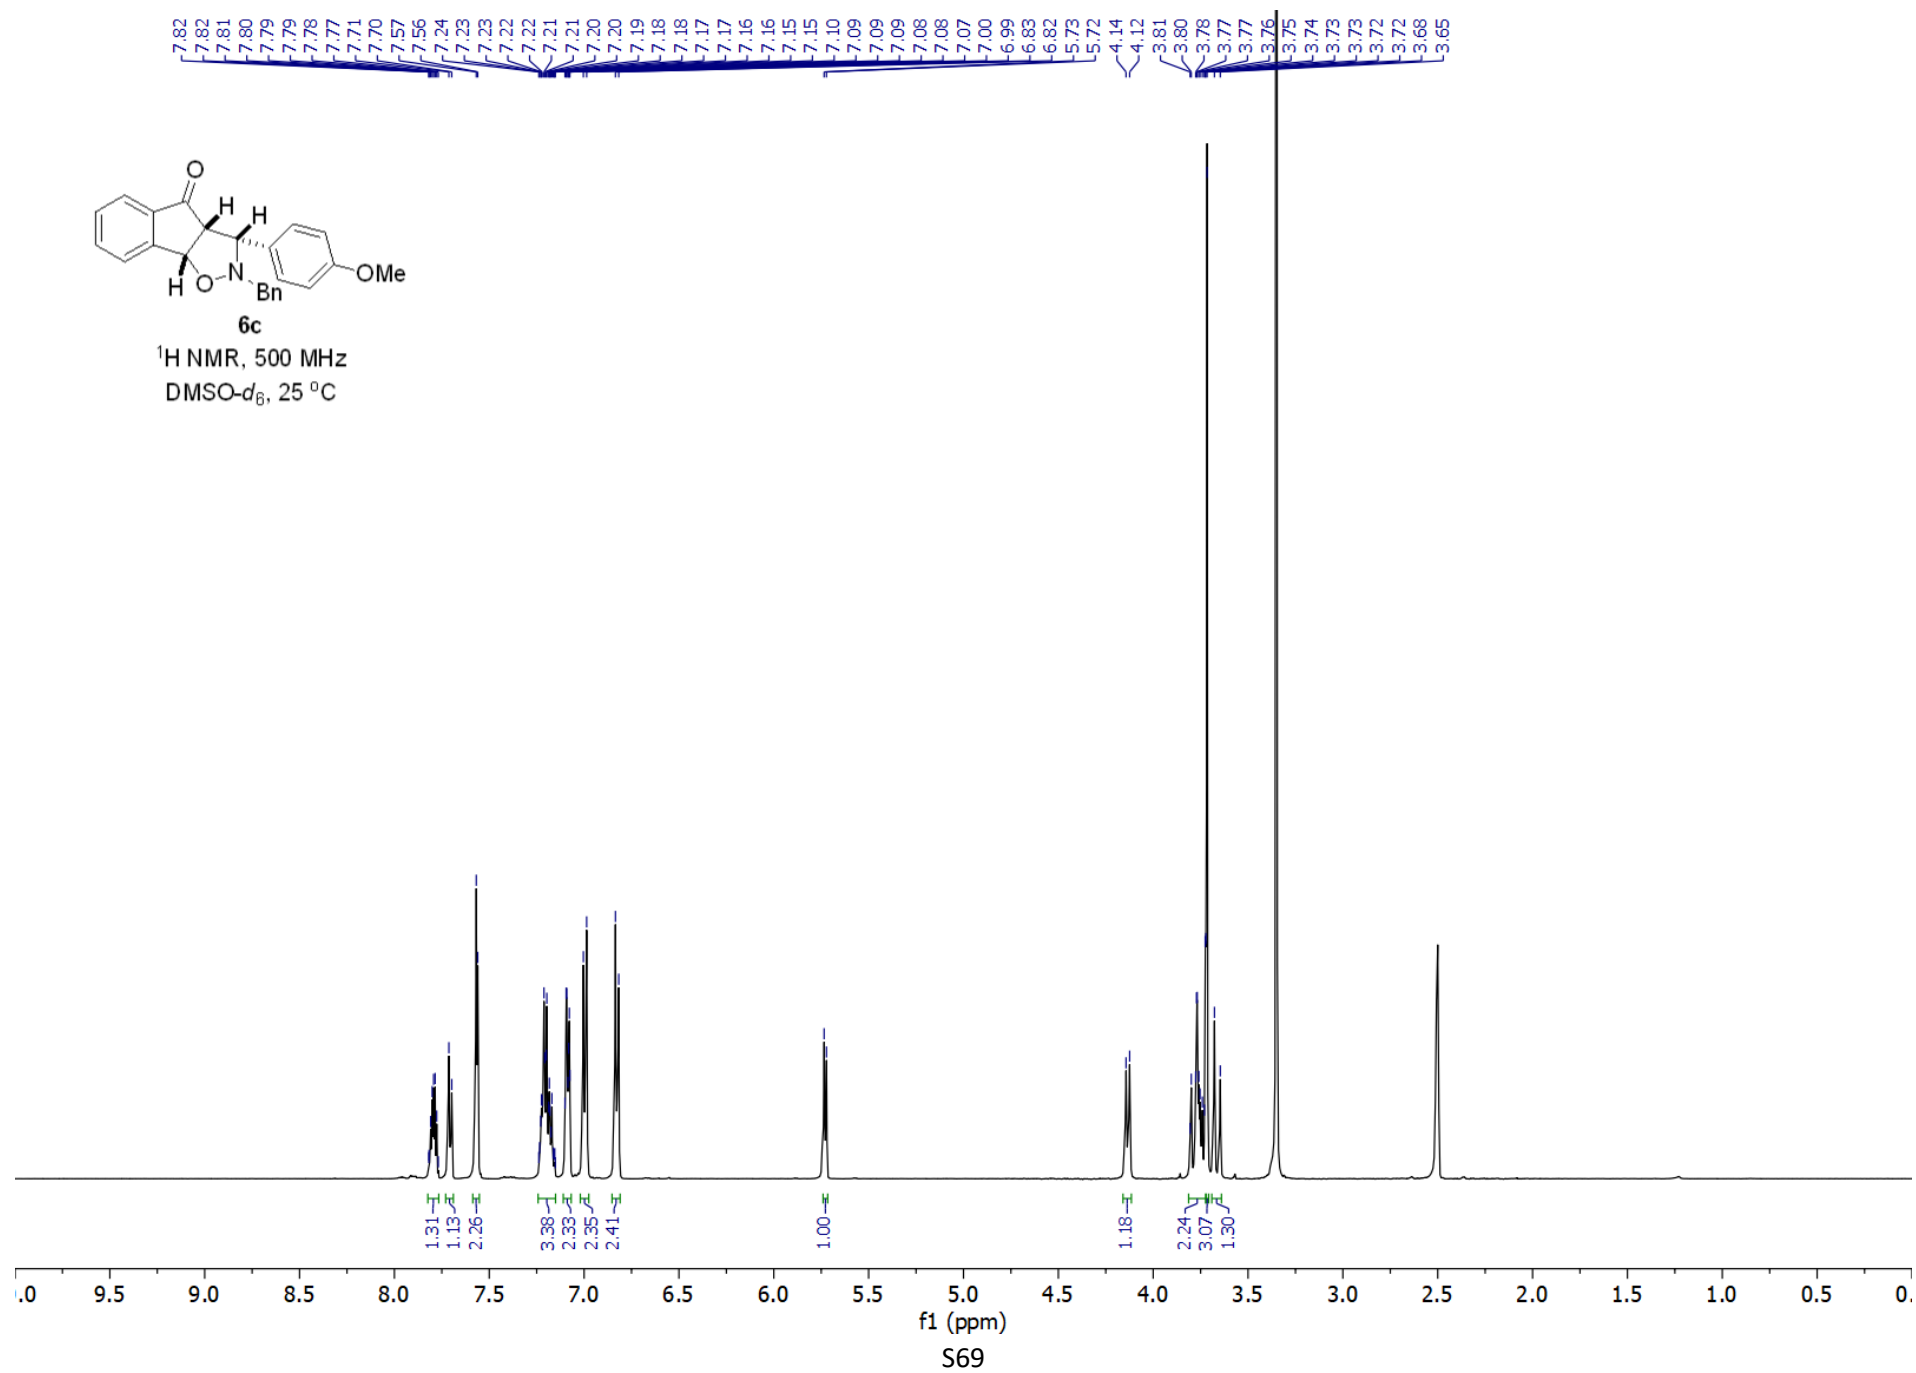

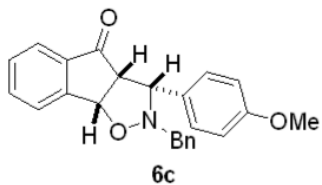

$^{13}\text{C}$  NMR, 125 MHz  
DMSO- $d_6$ , 25  $^{\circ}\text{C}$

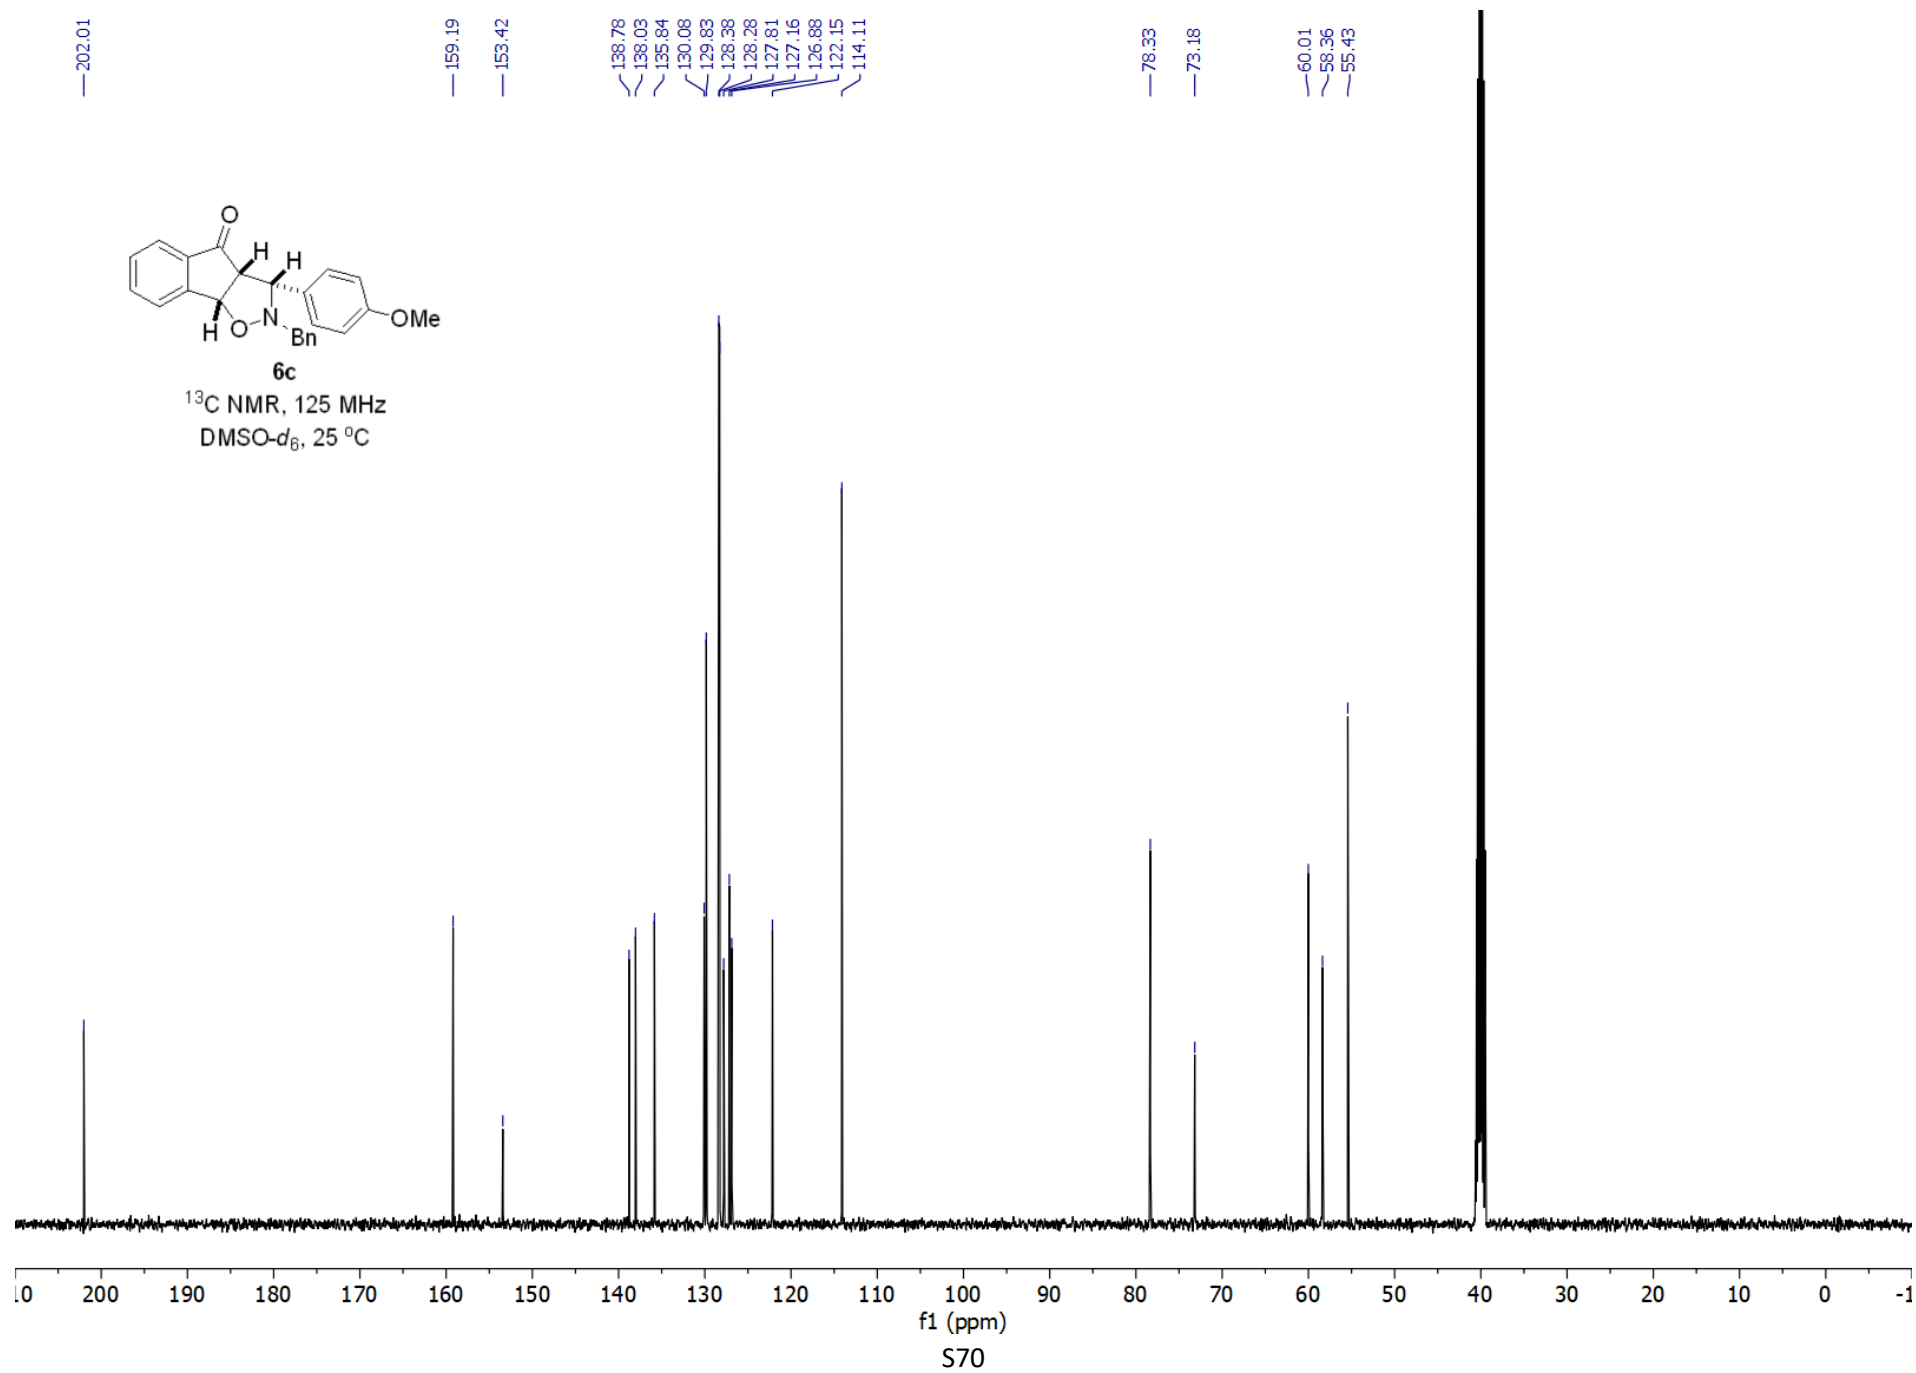

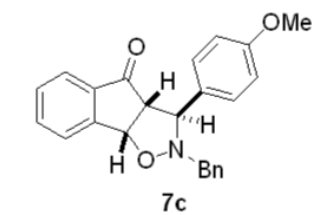

$^1\text{H}$  NMR, 500 MHz  
DMSO- $d_6$ , 60  $^\circ\text{C}$

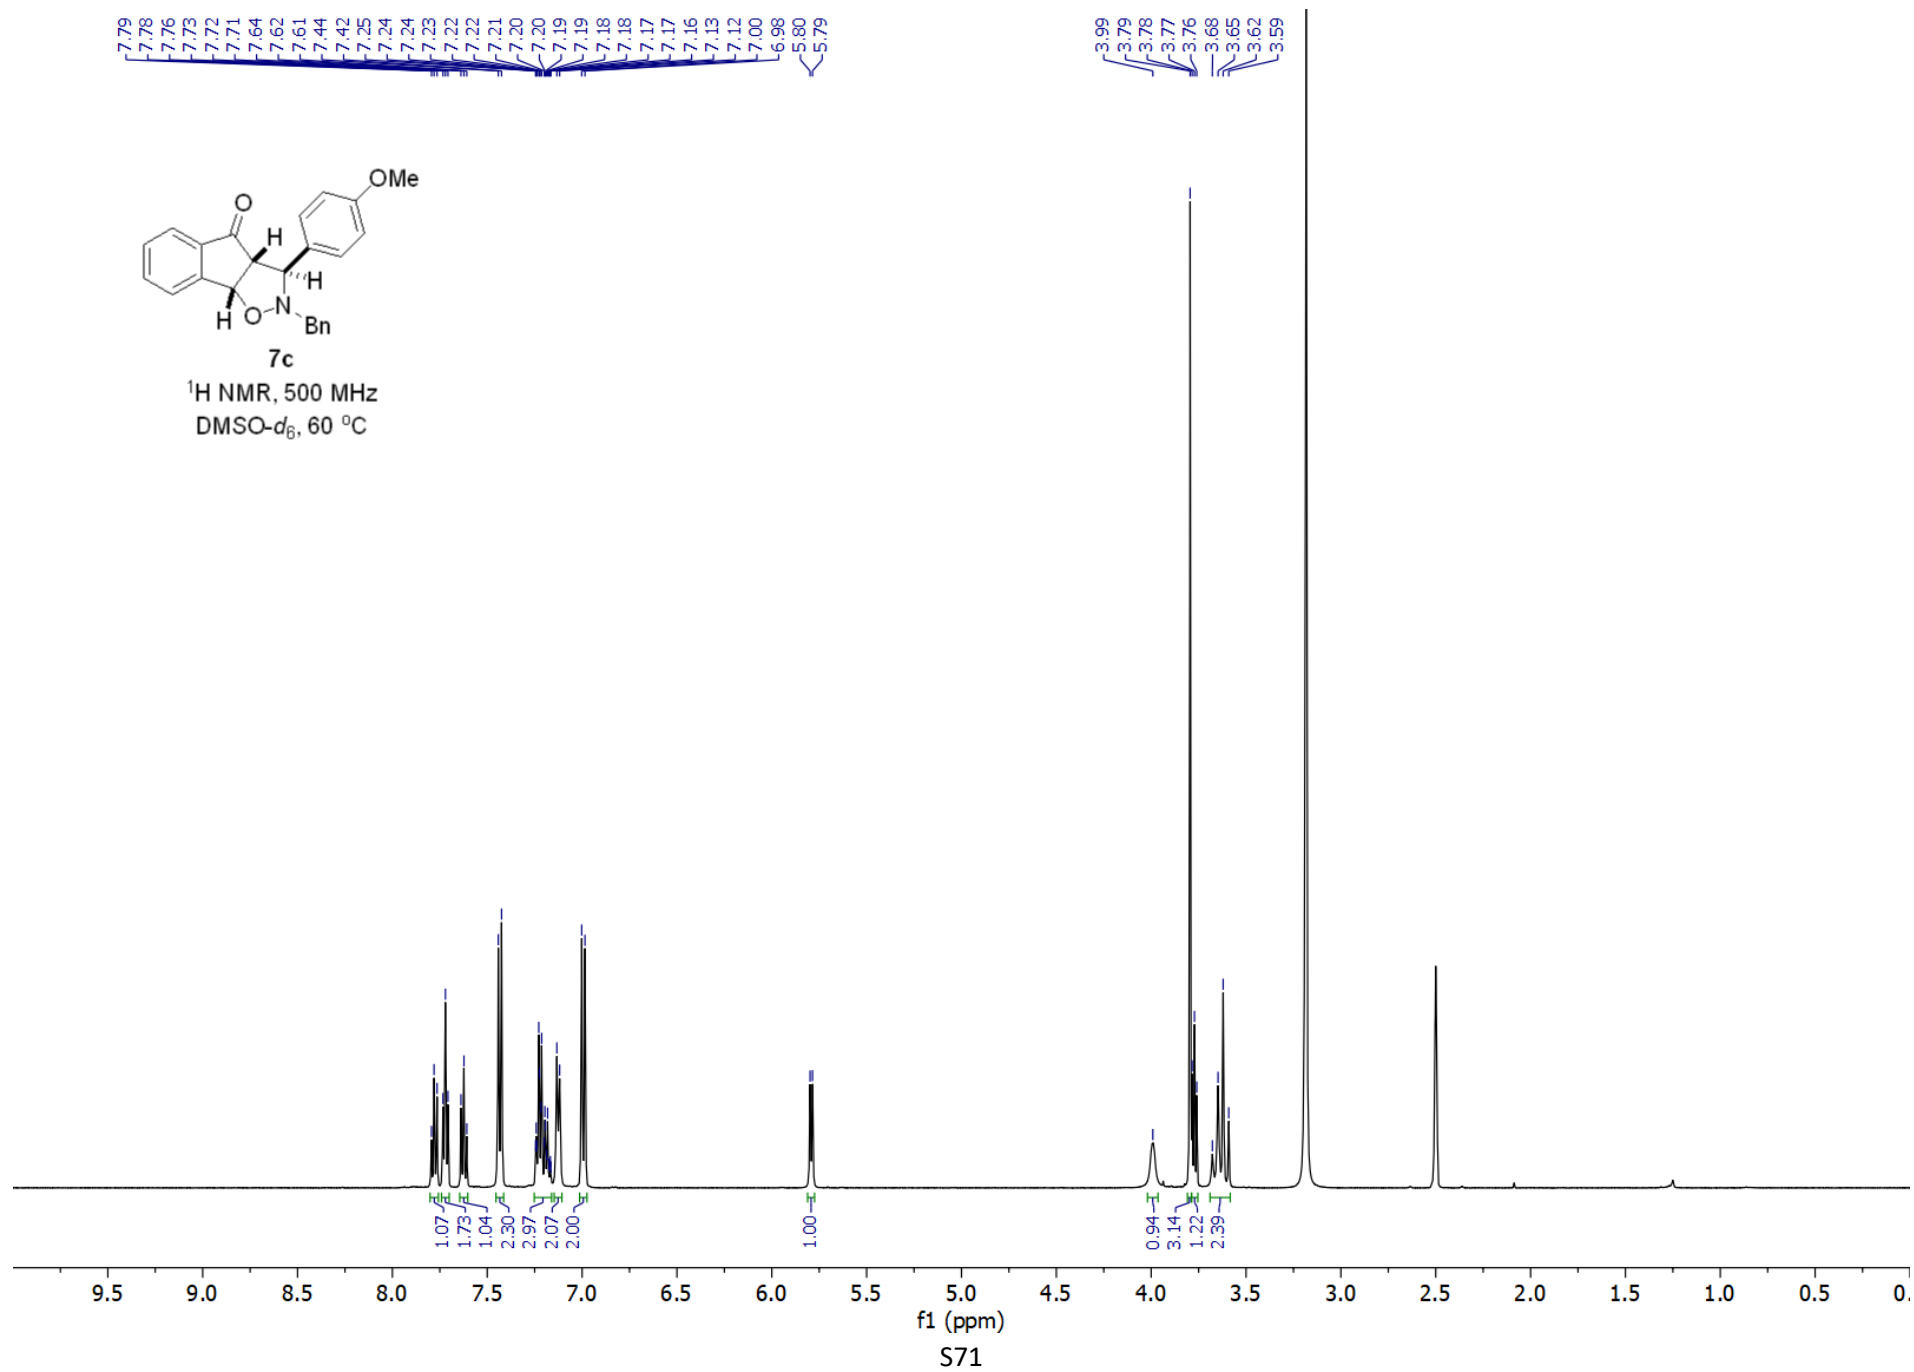

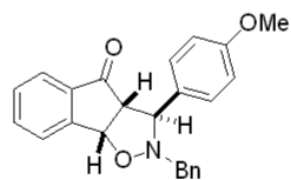

7c

$^{13}\text{C}$  NMR, 125 MHz  
DMSO- $d_6$ , 60  $^{\circ}\text{C}$

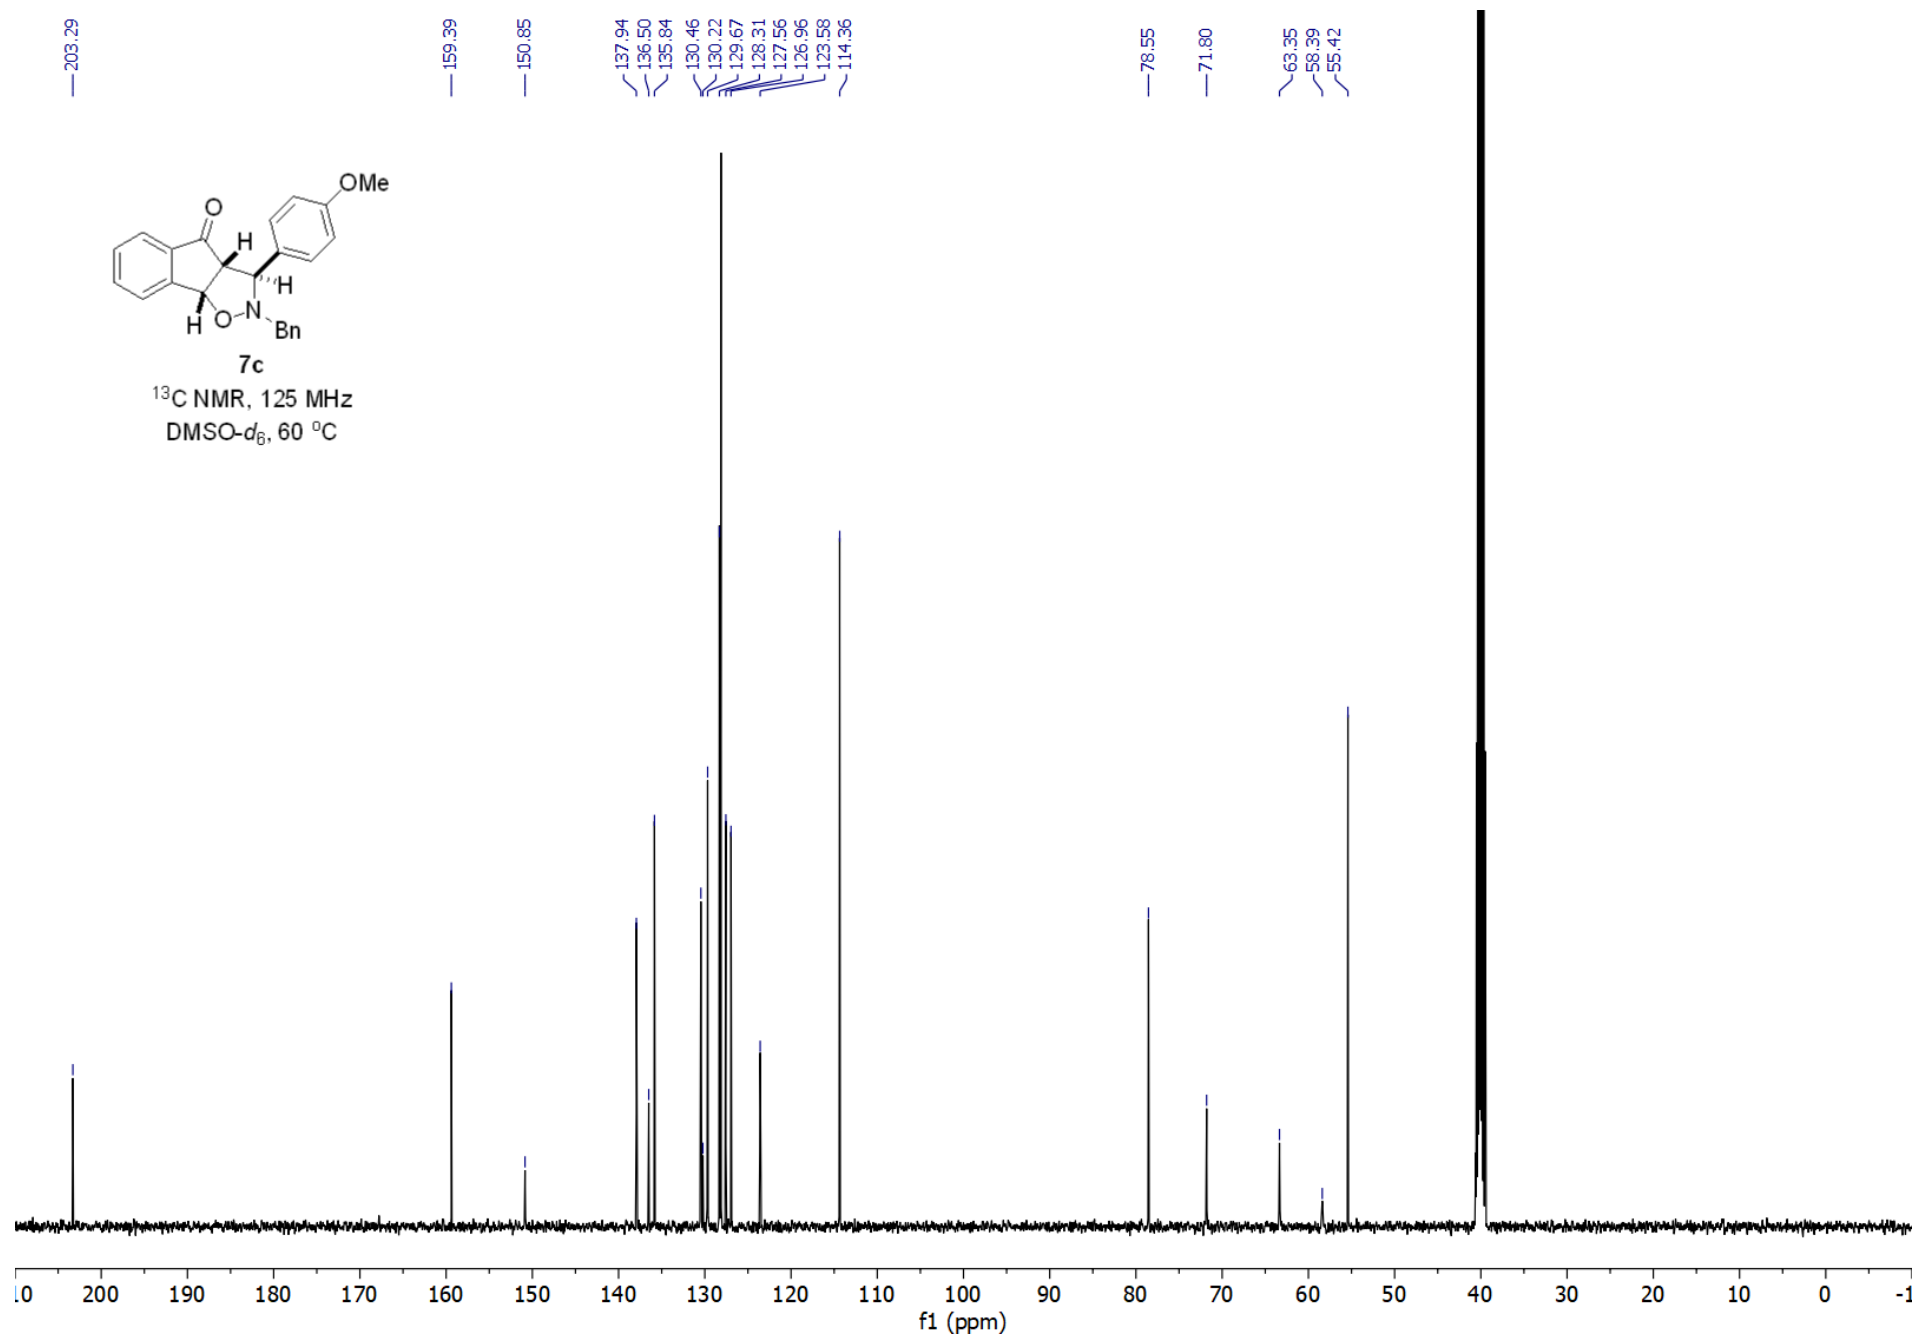

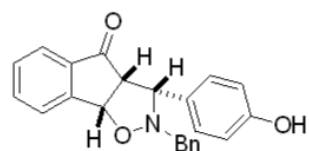

**6d**

$^1\text{H}$  NMR, 500 MHz  
DMSO- $d_6$ , 25  $^\circ\text{C}$

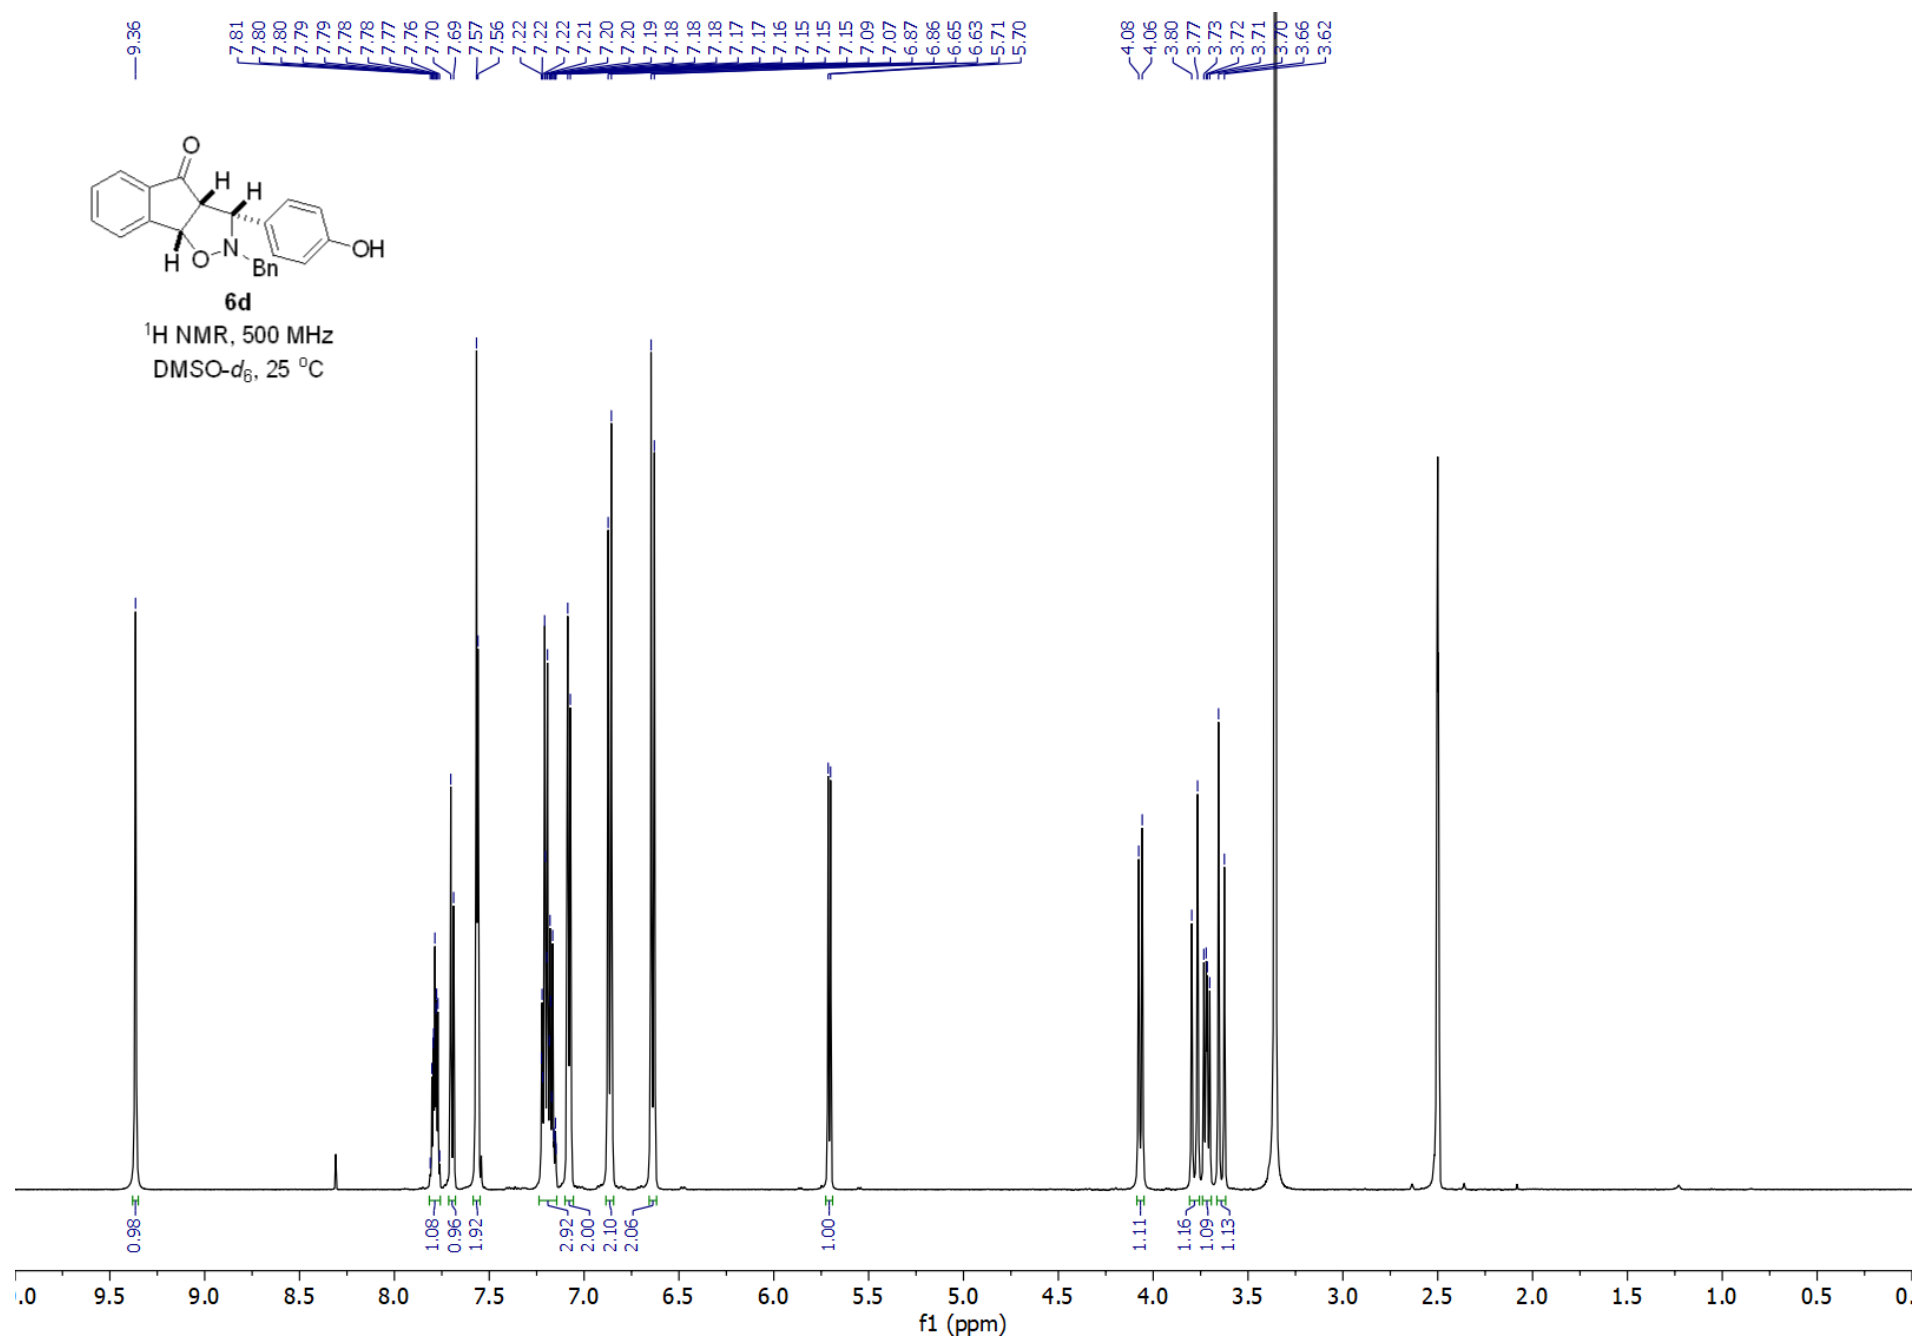

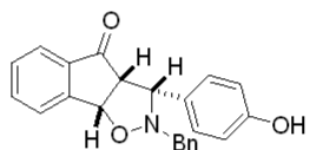

**6d**

$^{13}\text{C}$  NMR, 125 MHz  
DMSO- $d_6$ , 25 °C

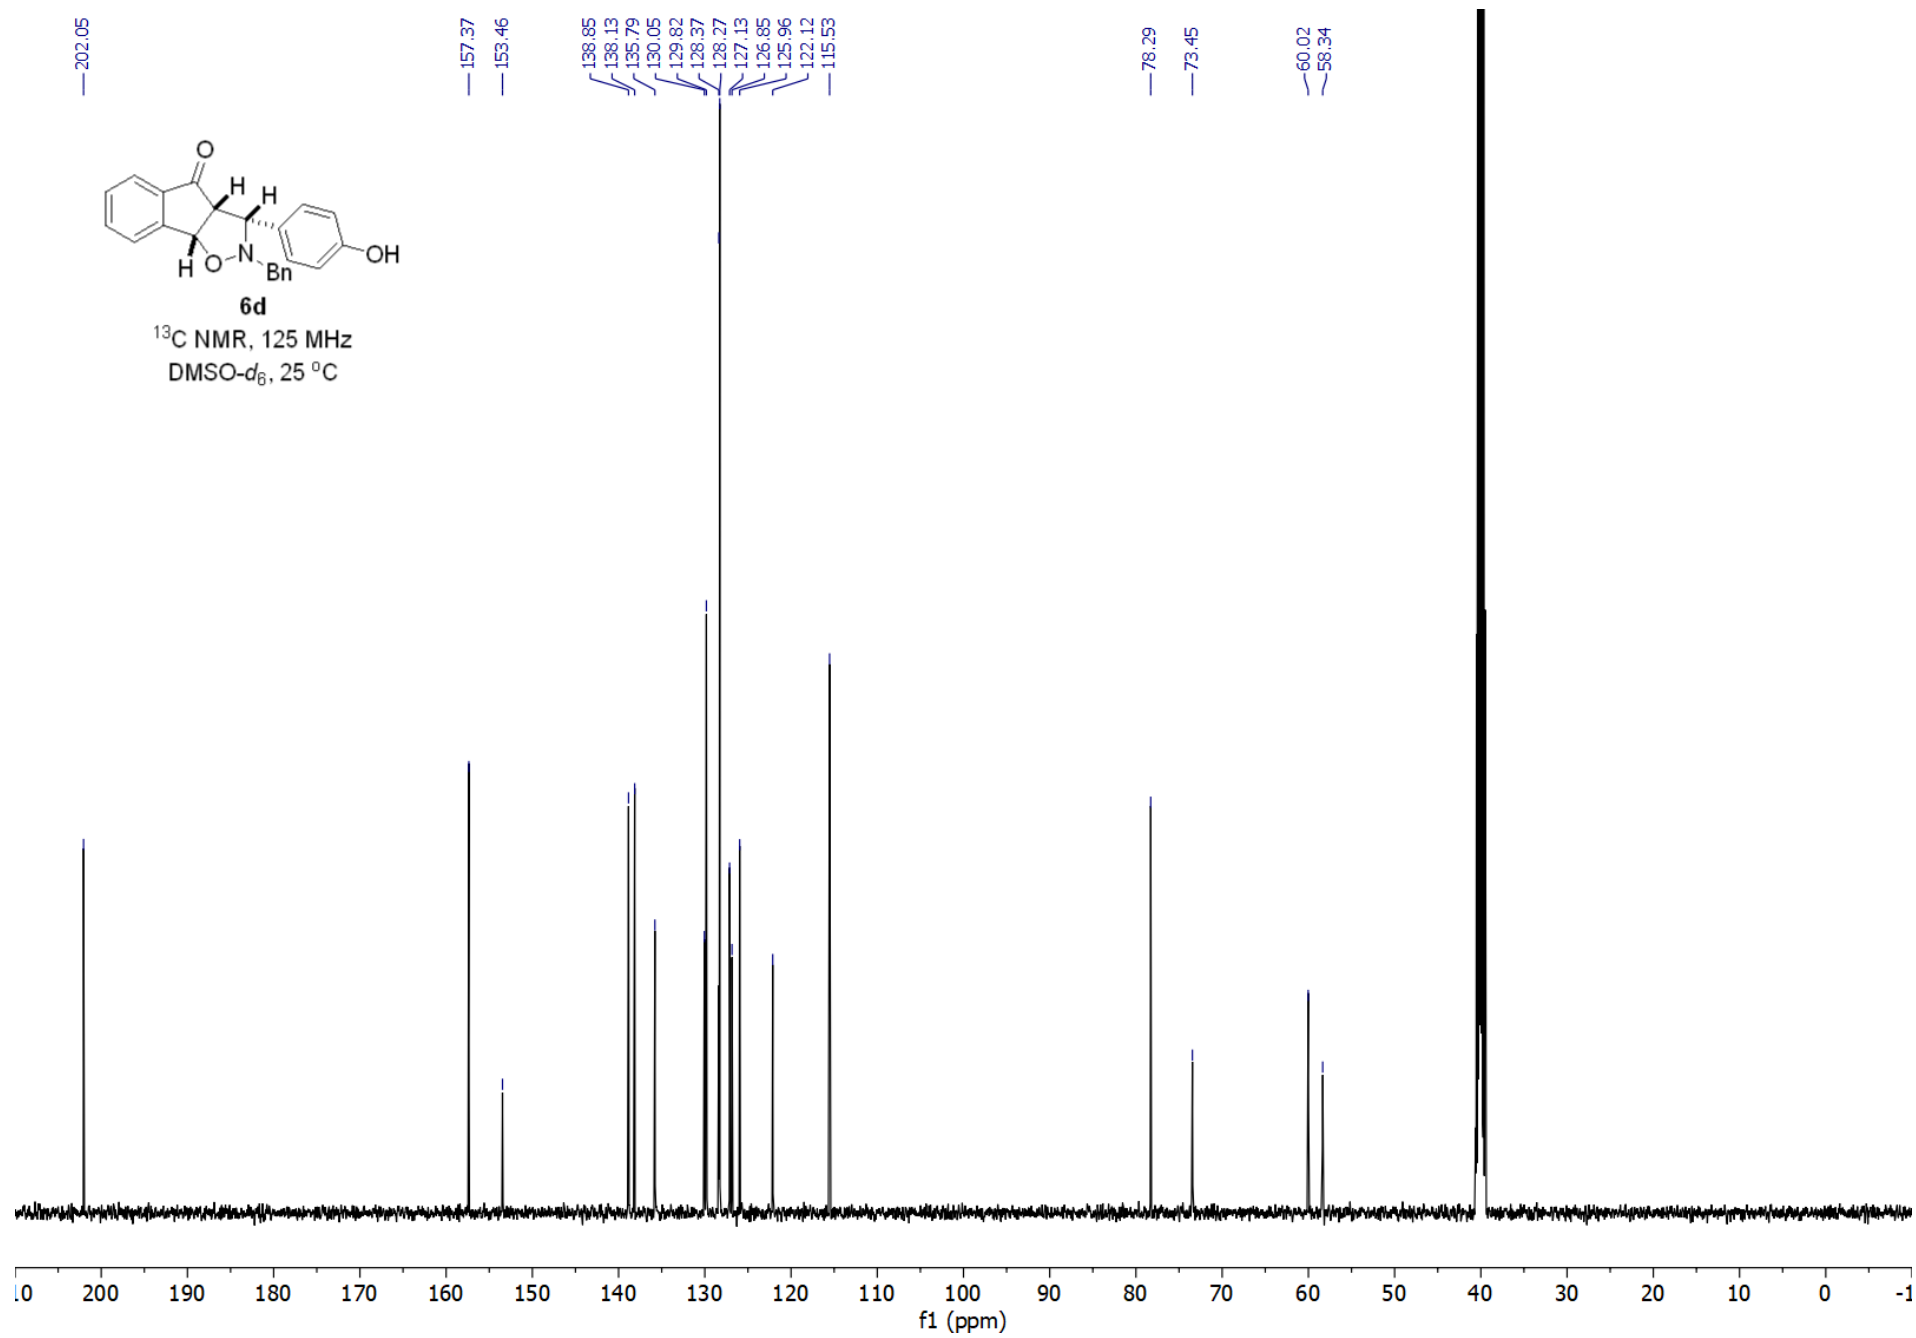

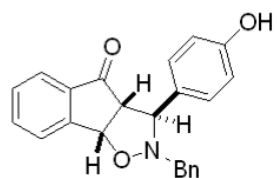

**7d**

$^1\text{H}$  NMR, 500 MHz  
DMSO- $d_6$ , 60  $^\circ\text{C}$

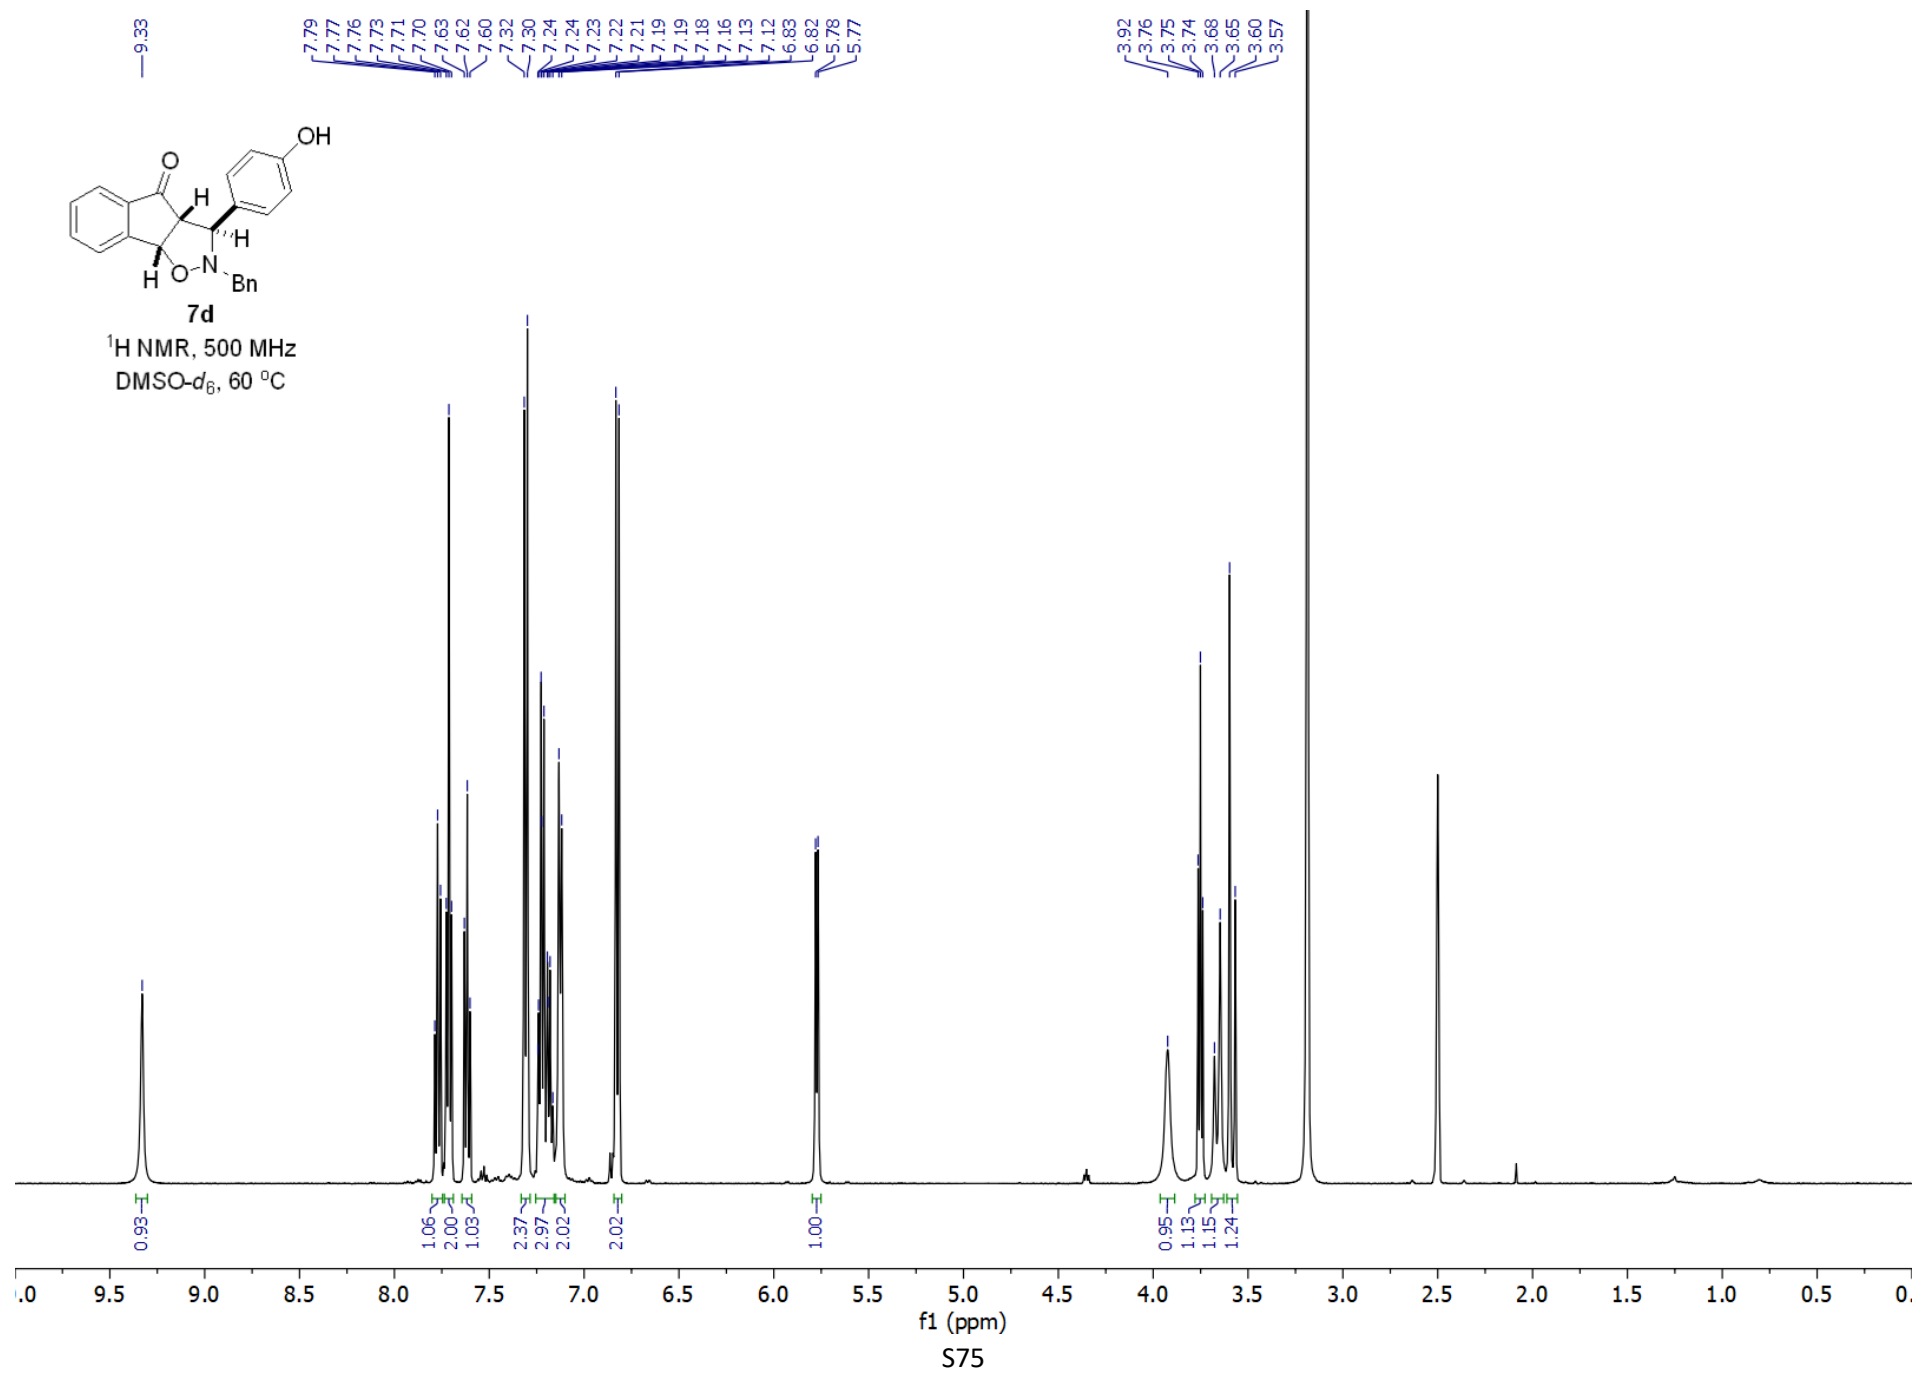

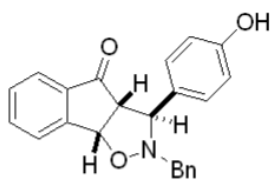

**7d**

$^{13}\text{C}$  NMR, 125 MHz  
DMSO- $d_6$ , 60  $^{\circ}\text{C}$

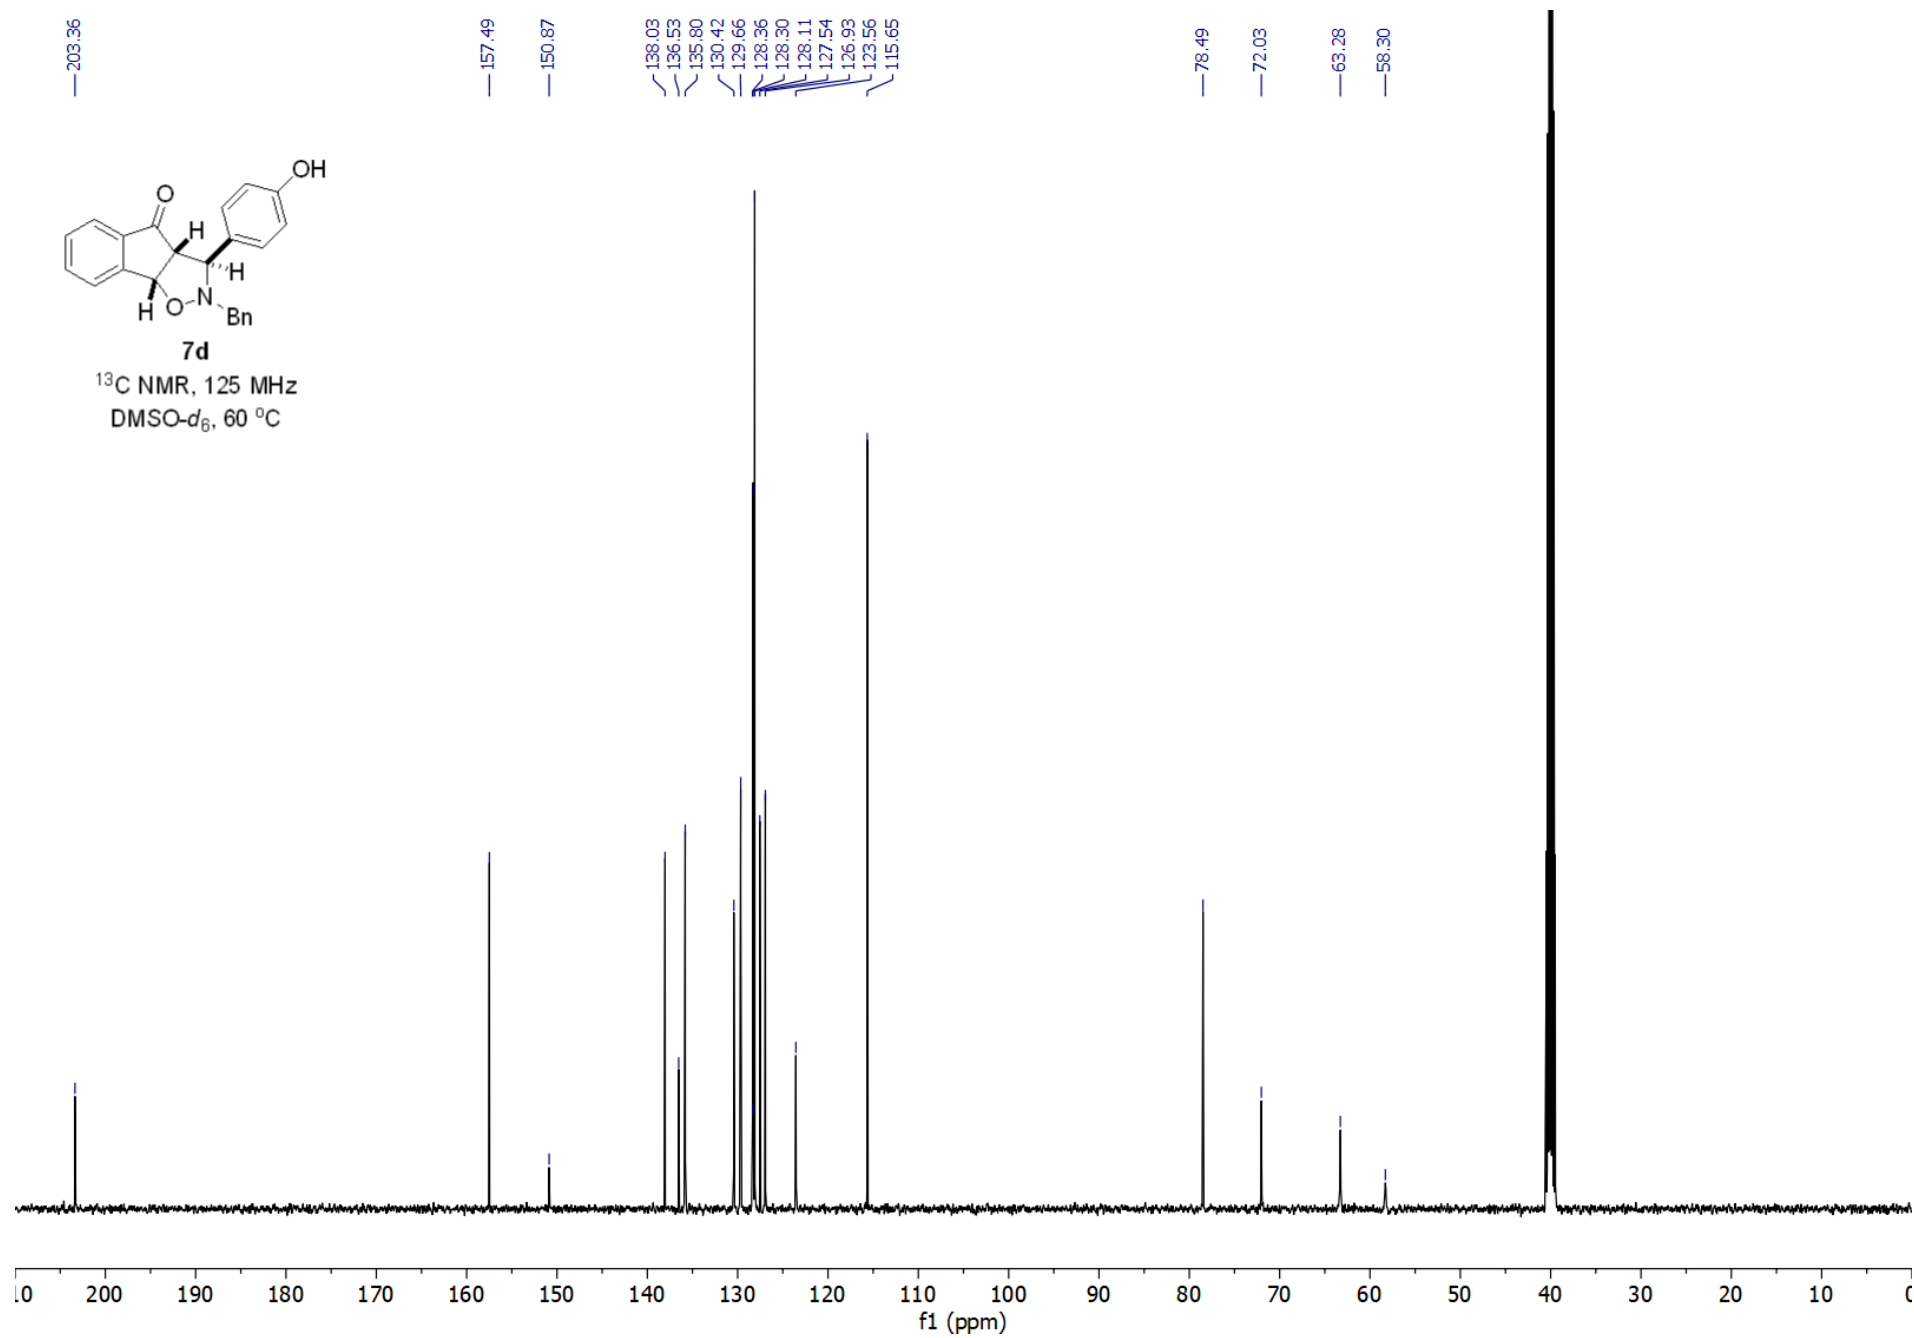

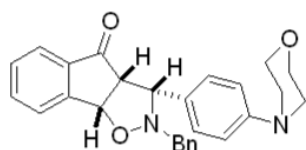

**6e**

$^1\text{H}$  NMR, 500 MHz  
DMSO- $d_6$ , 25 °C

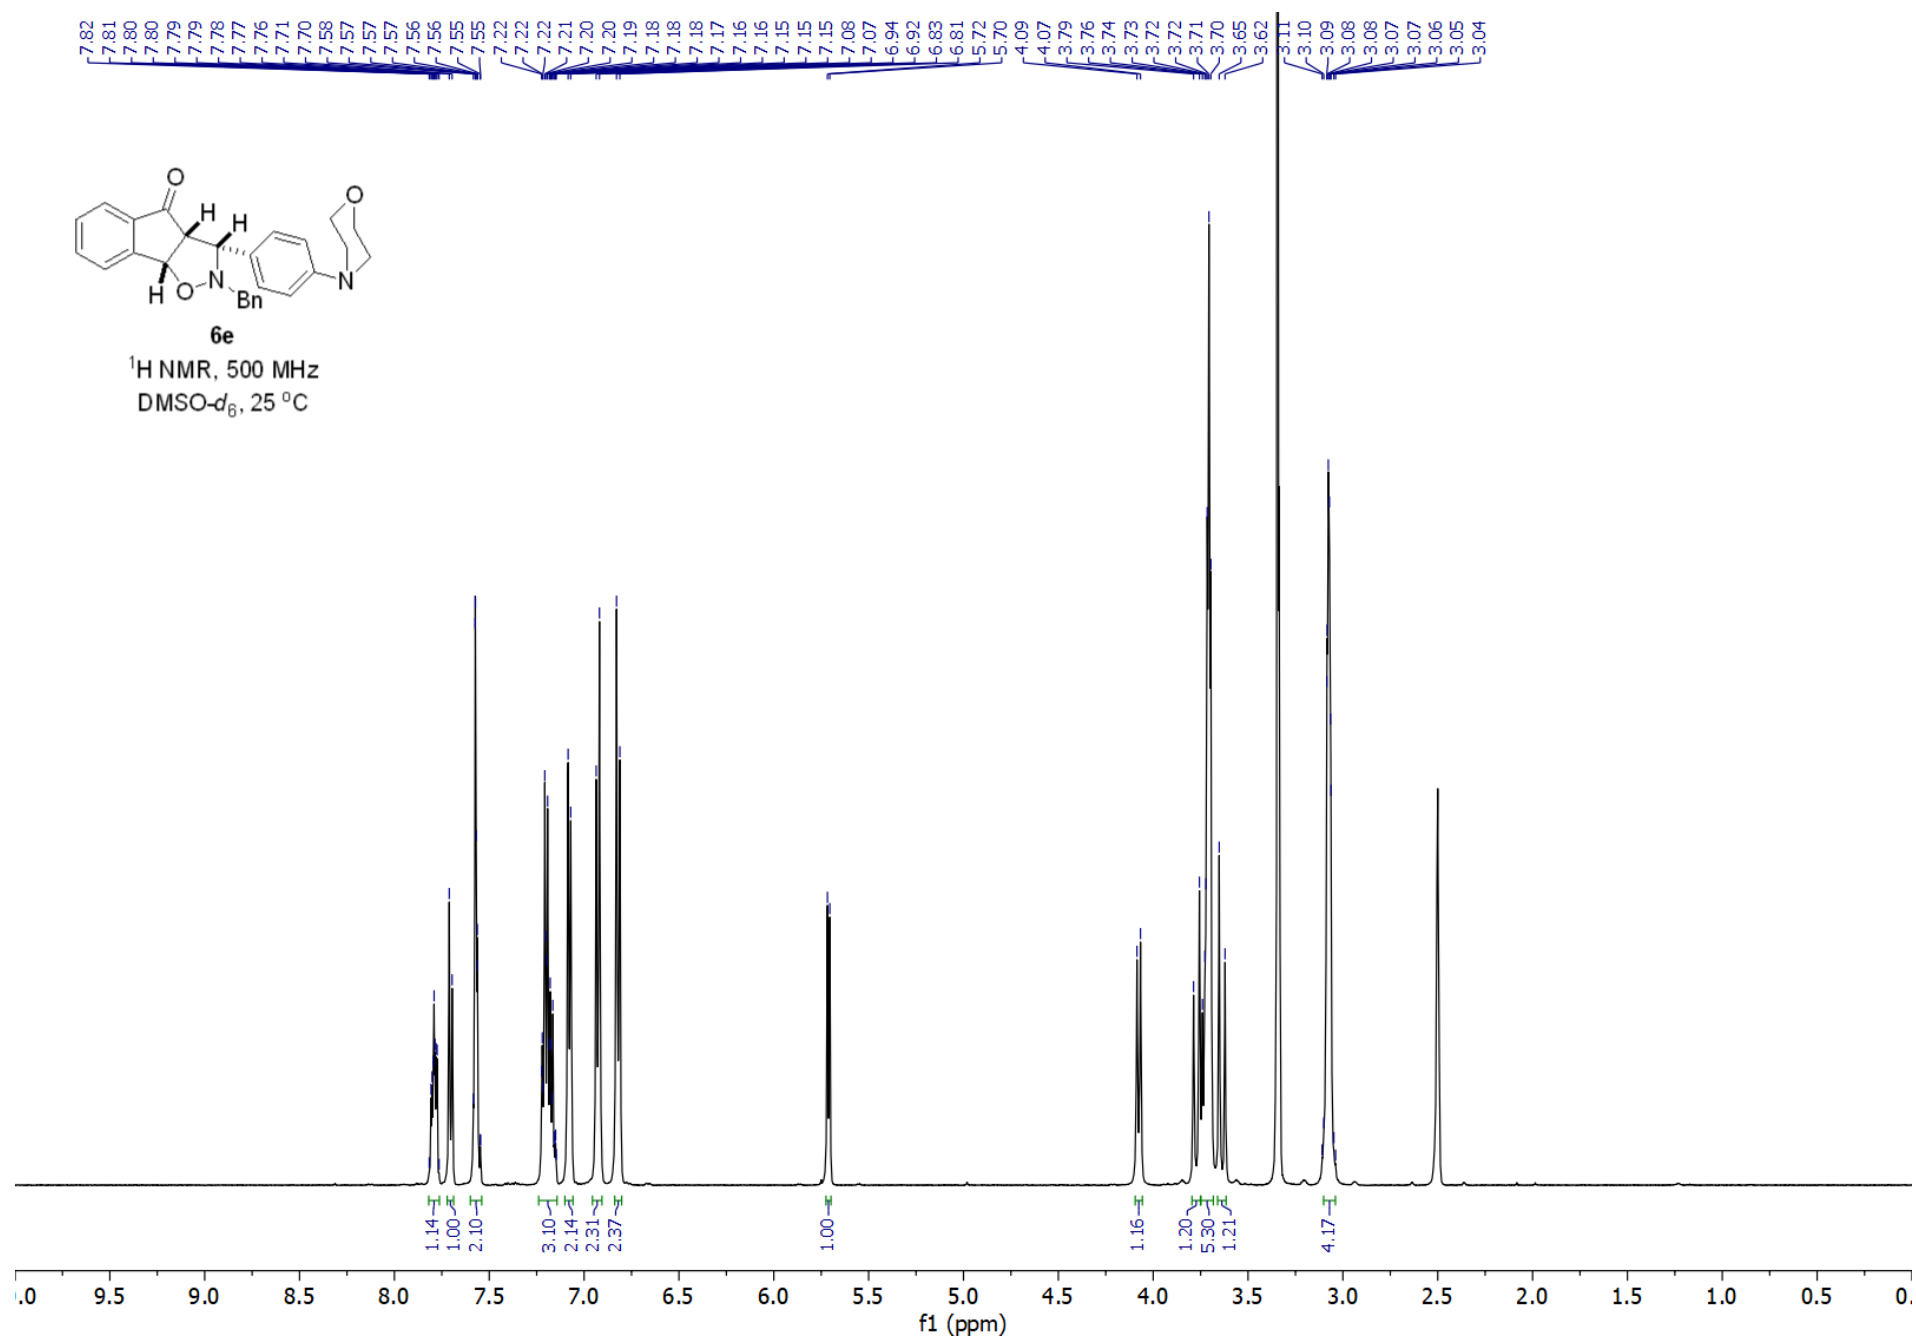

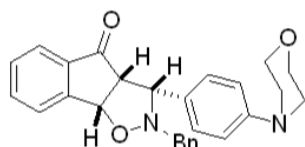

**6e**

$^{13}\text{C}$  NMR, 125 MHz  
DMSO- $d_6$ , 25 °C

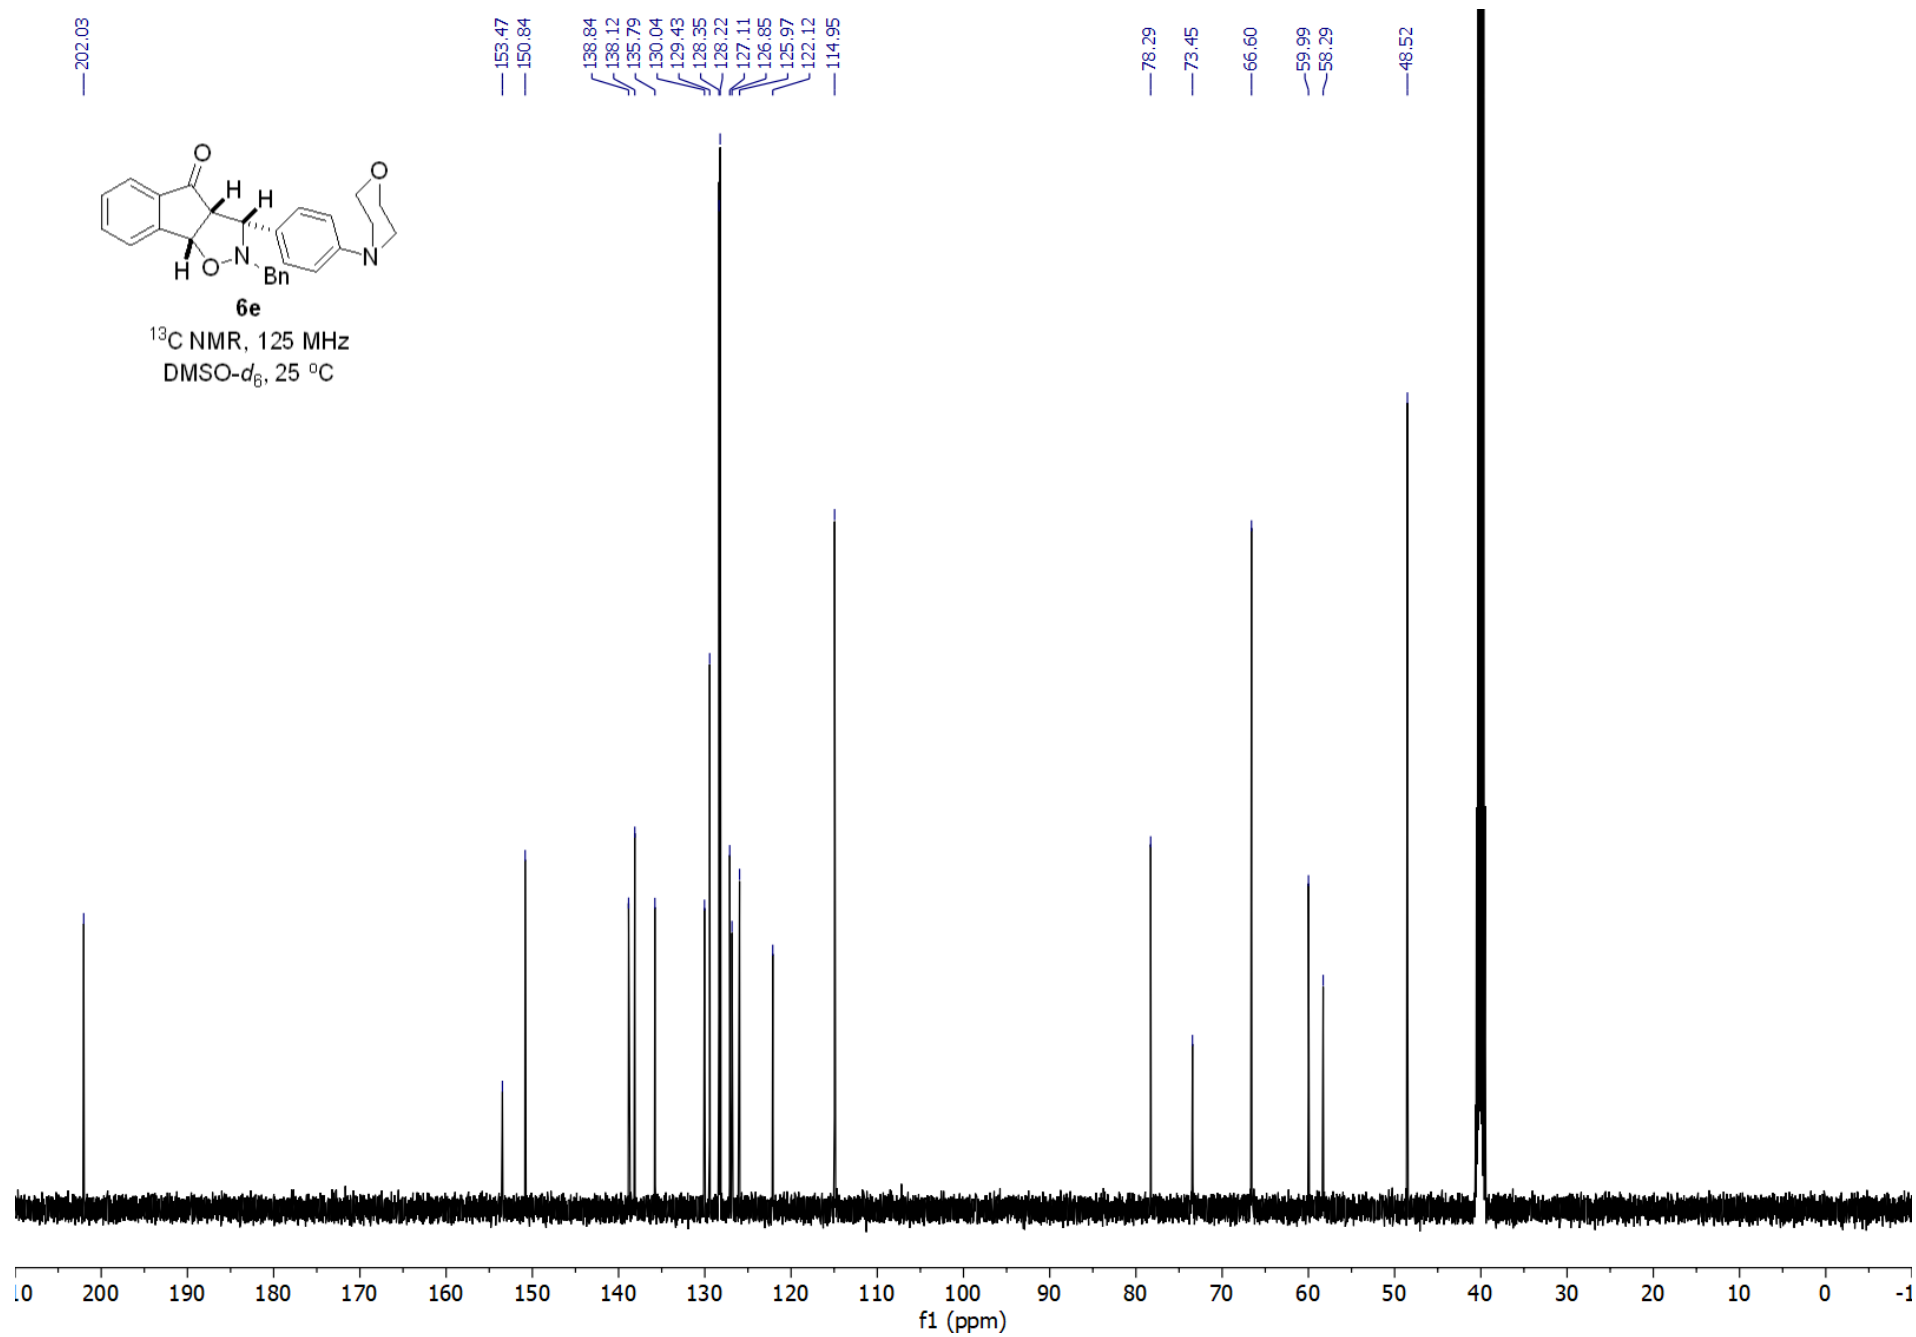

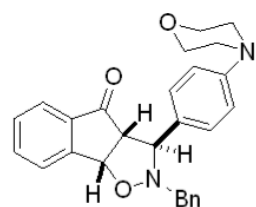

**7e**

$^1\text{H}$  NMR, 500 MHz  
DMSO- $d_6$ , 60 °C

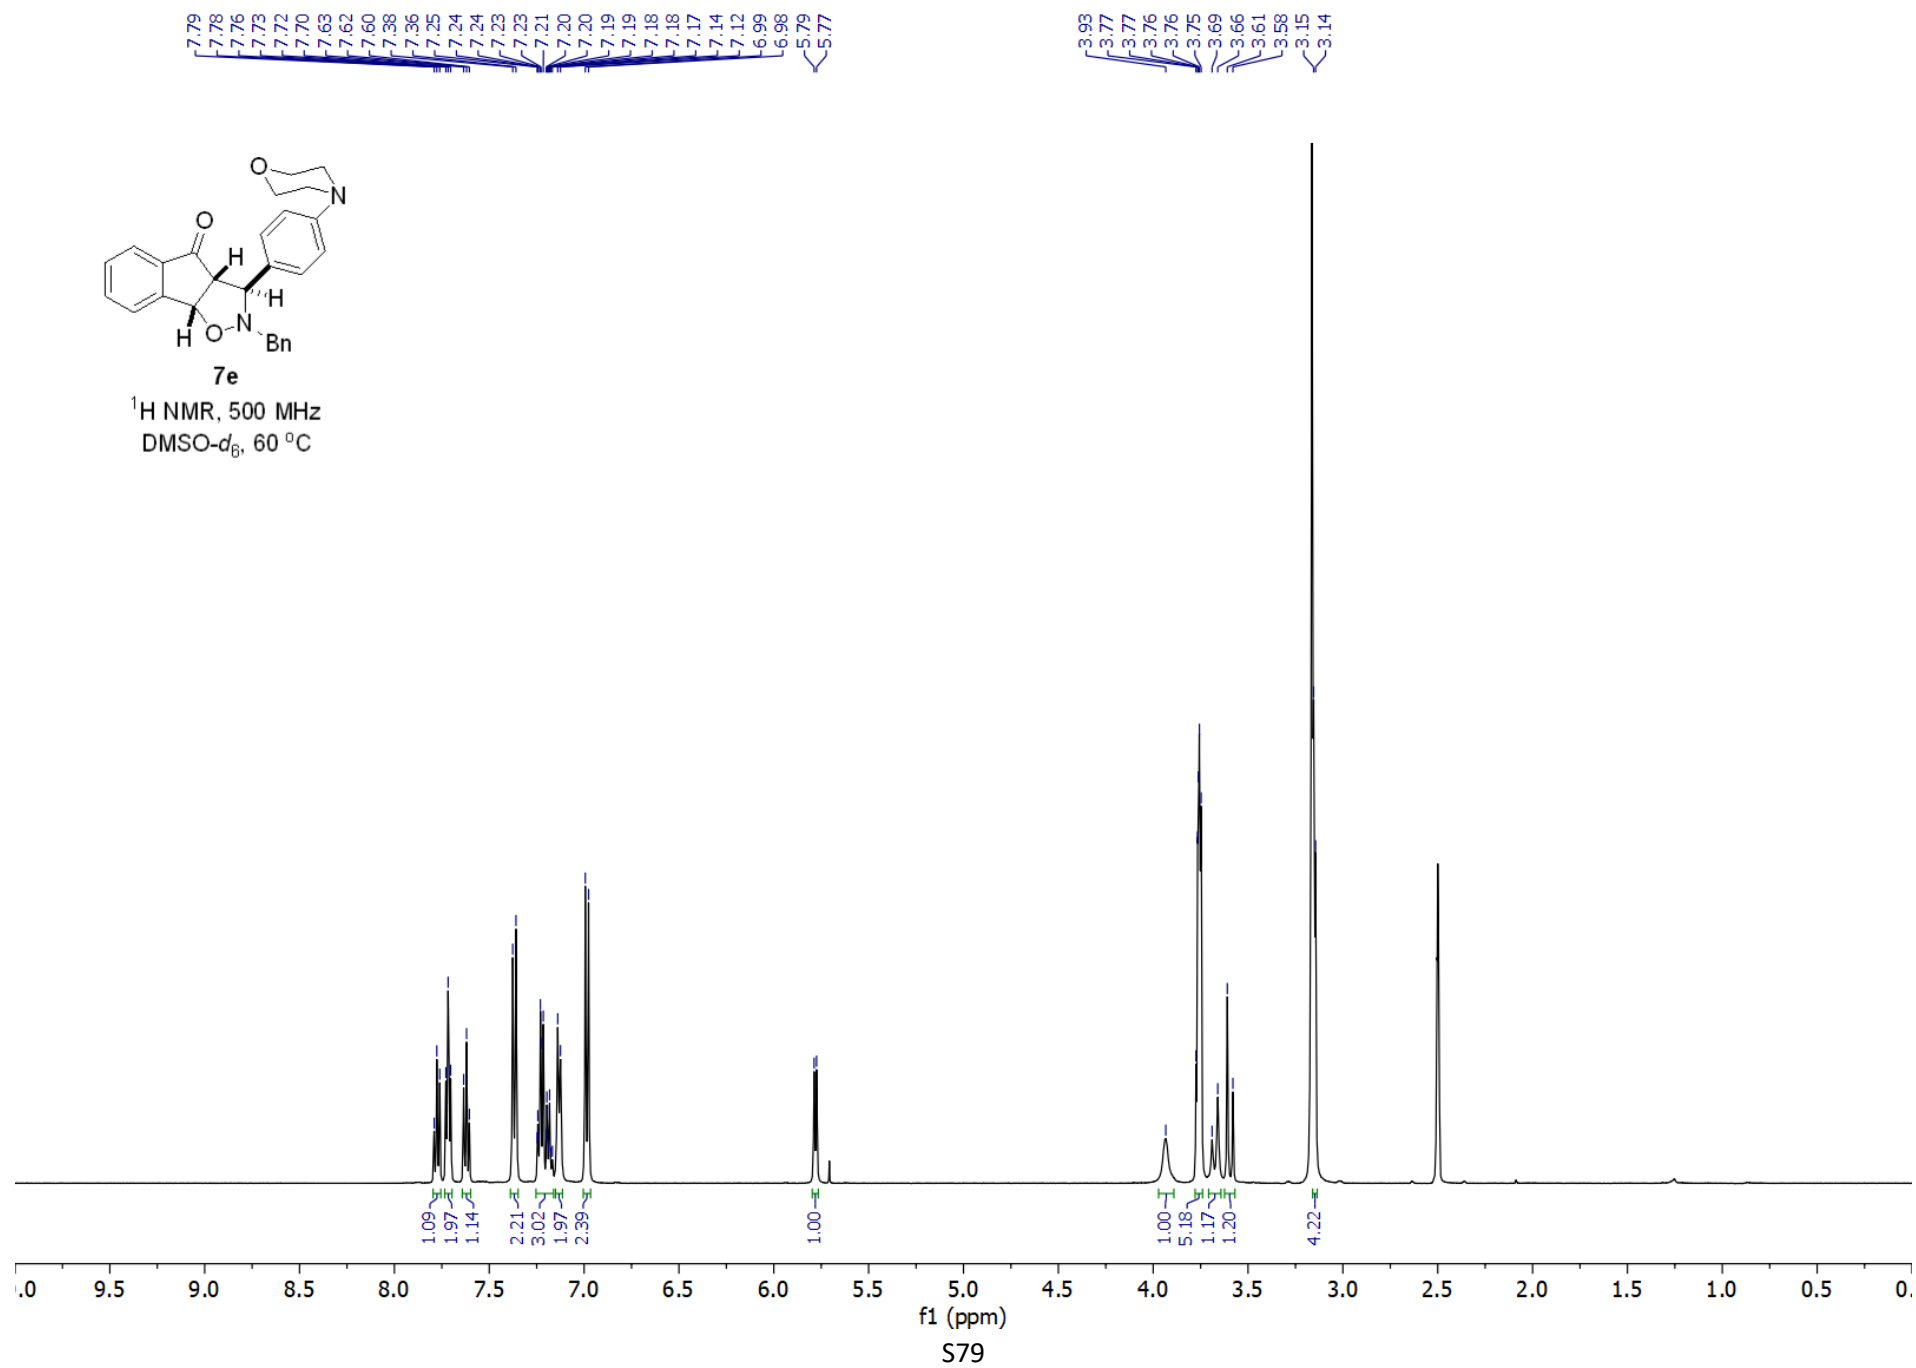

— 203.31

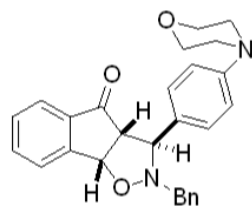

**7e**

$^{13}\text{C}$  NMR, 125 MHz  
DMSO- $d_6$ , 60 °C

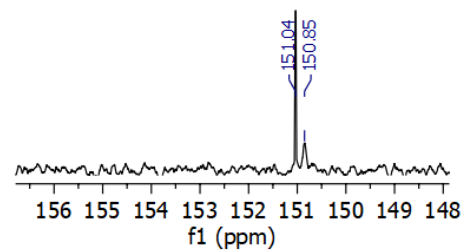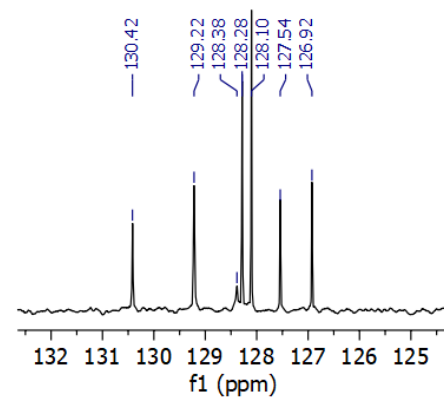

151.04  
150.85

138.03  
136.51  
135.80

130.42  
129.22  
128.38

128.28  
128.10  
127.54

126.92  
123.55  
115.23

78.51

71.97

66.35  
63.25  
58.32

48.60

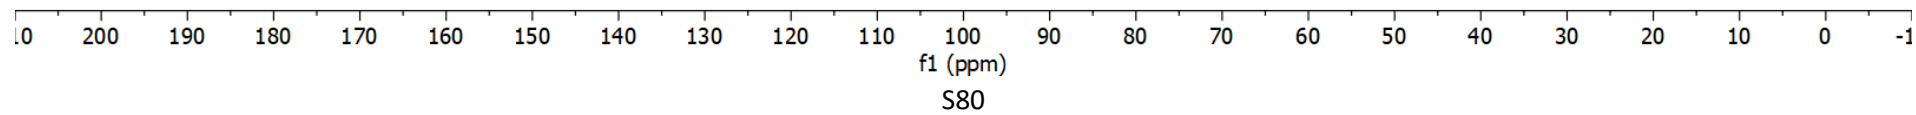

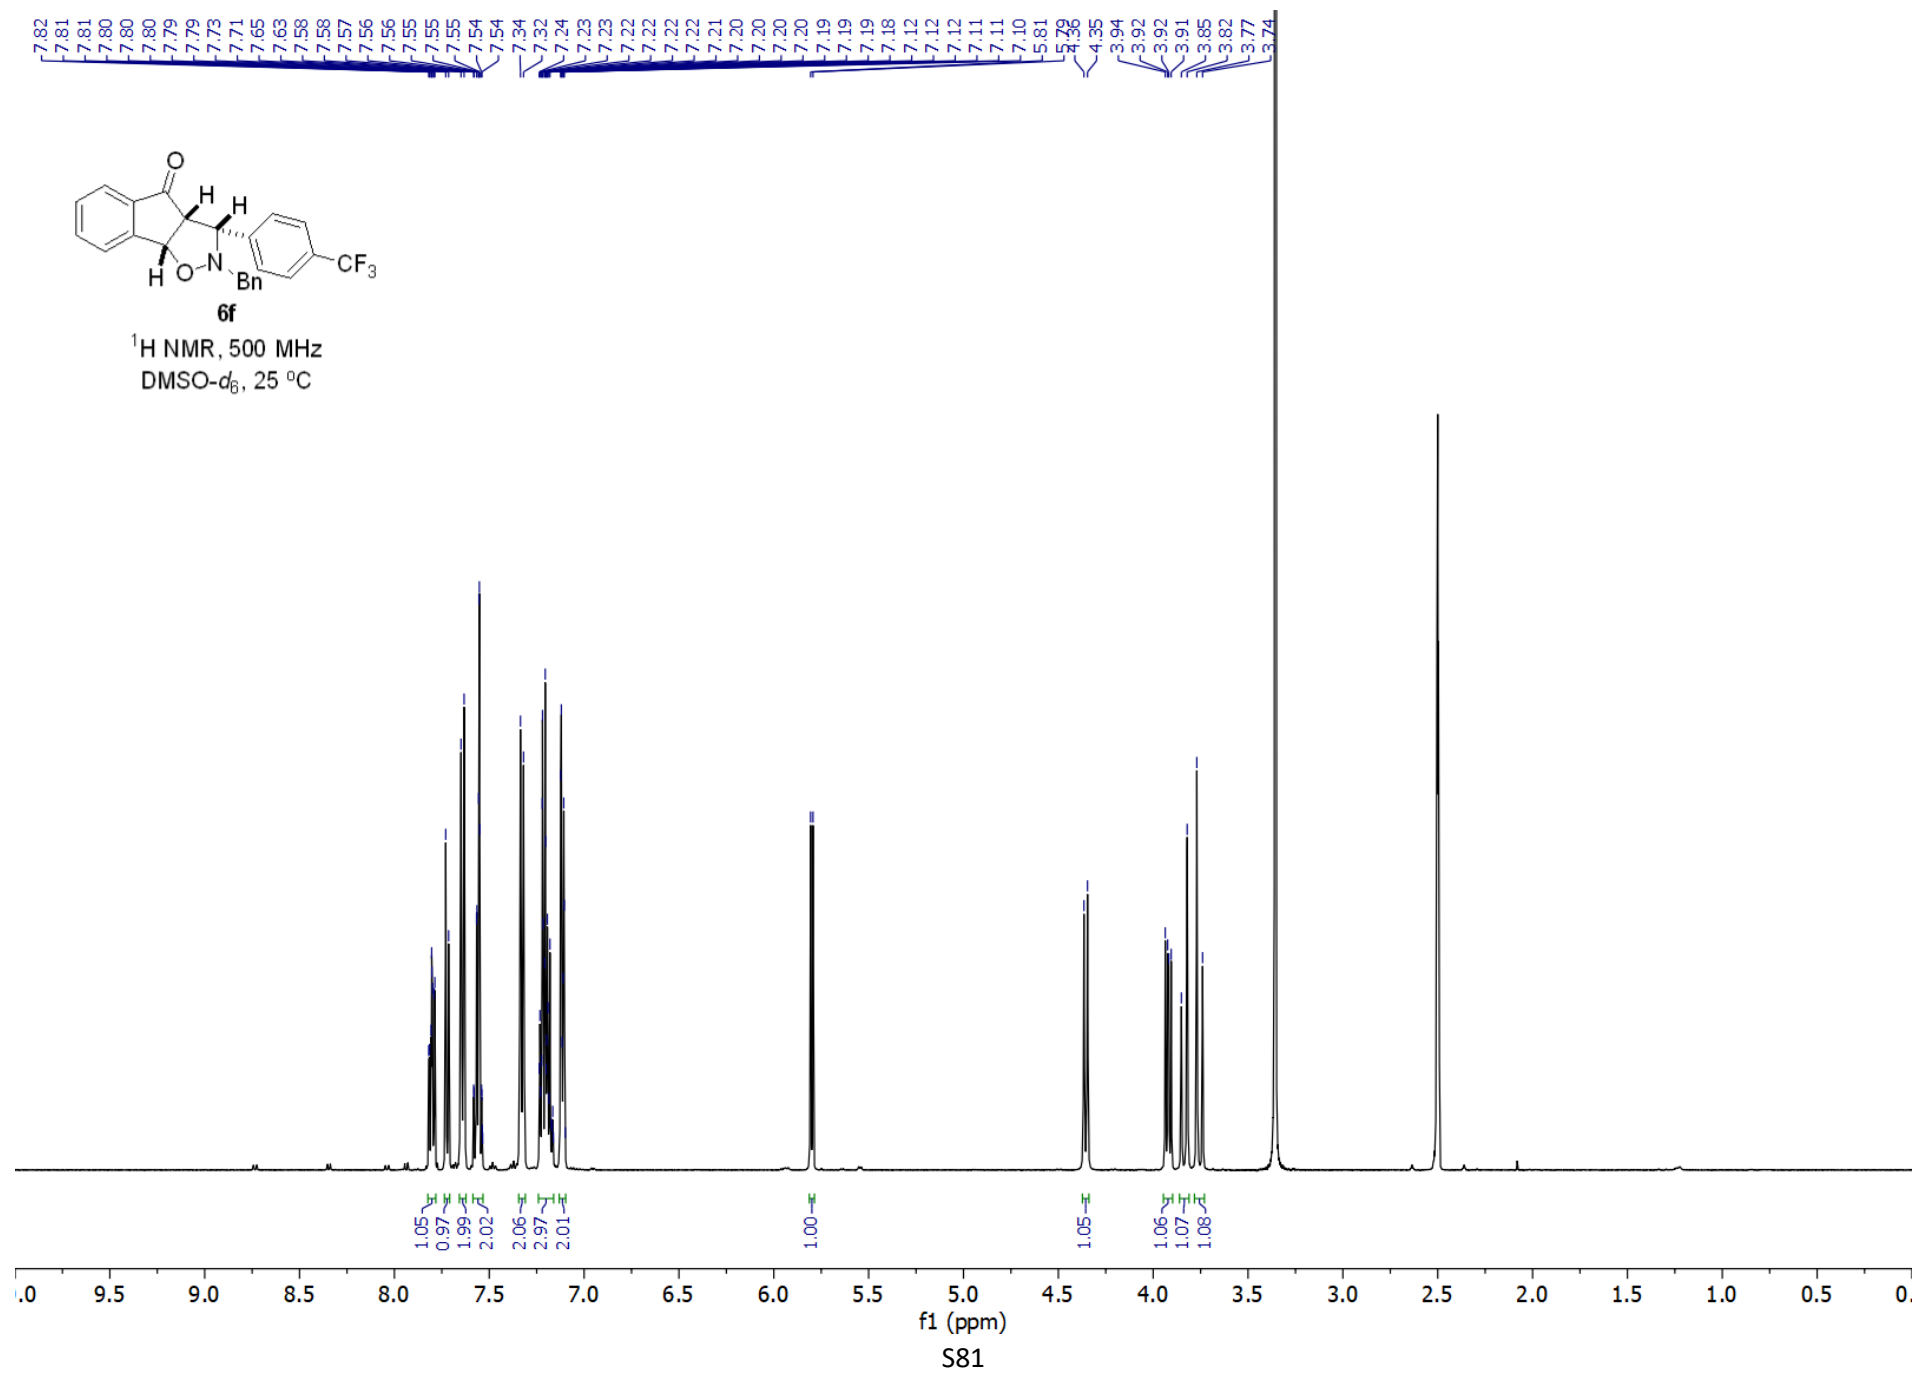

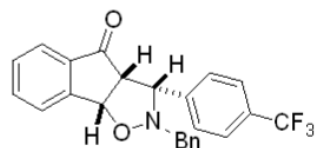

**6f**

$^{13}\text{C}$  NMR, 125 MHz  
DMSO- $d_6$ , 25 °C

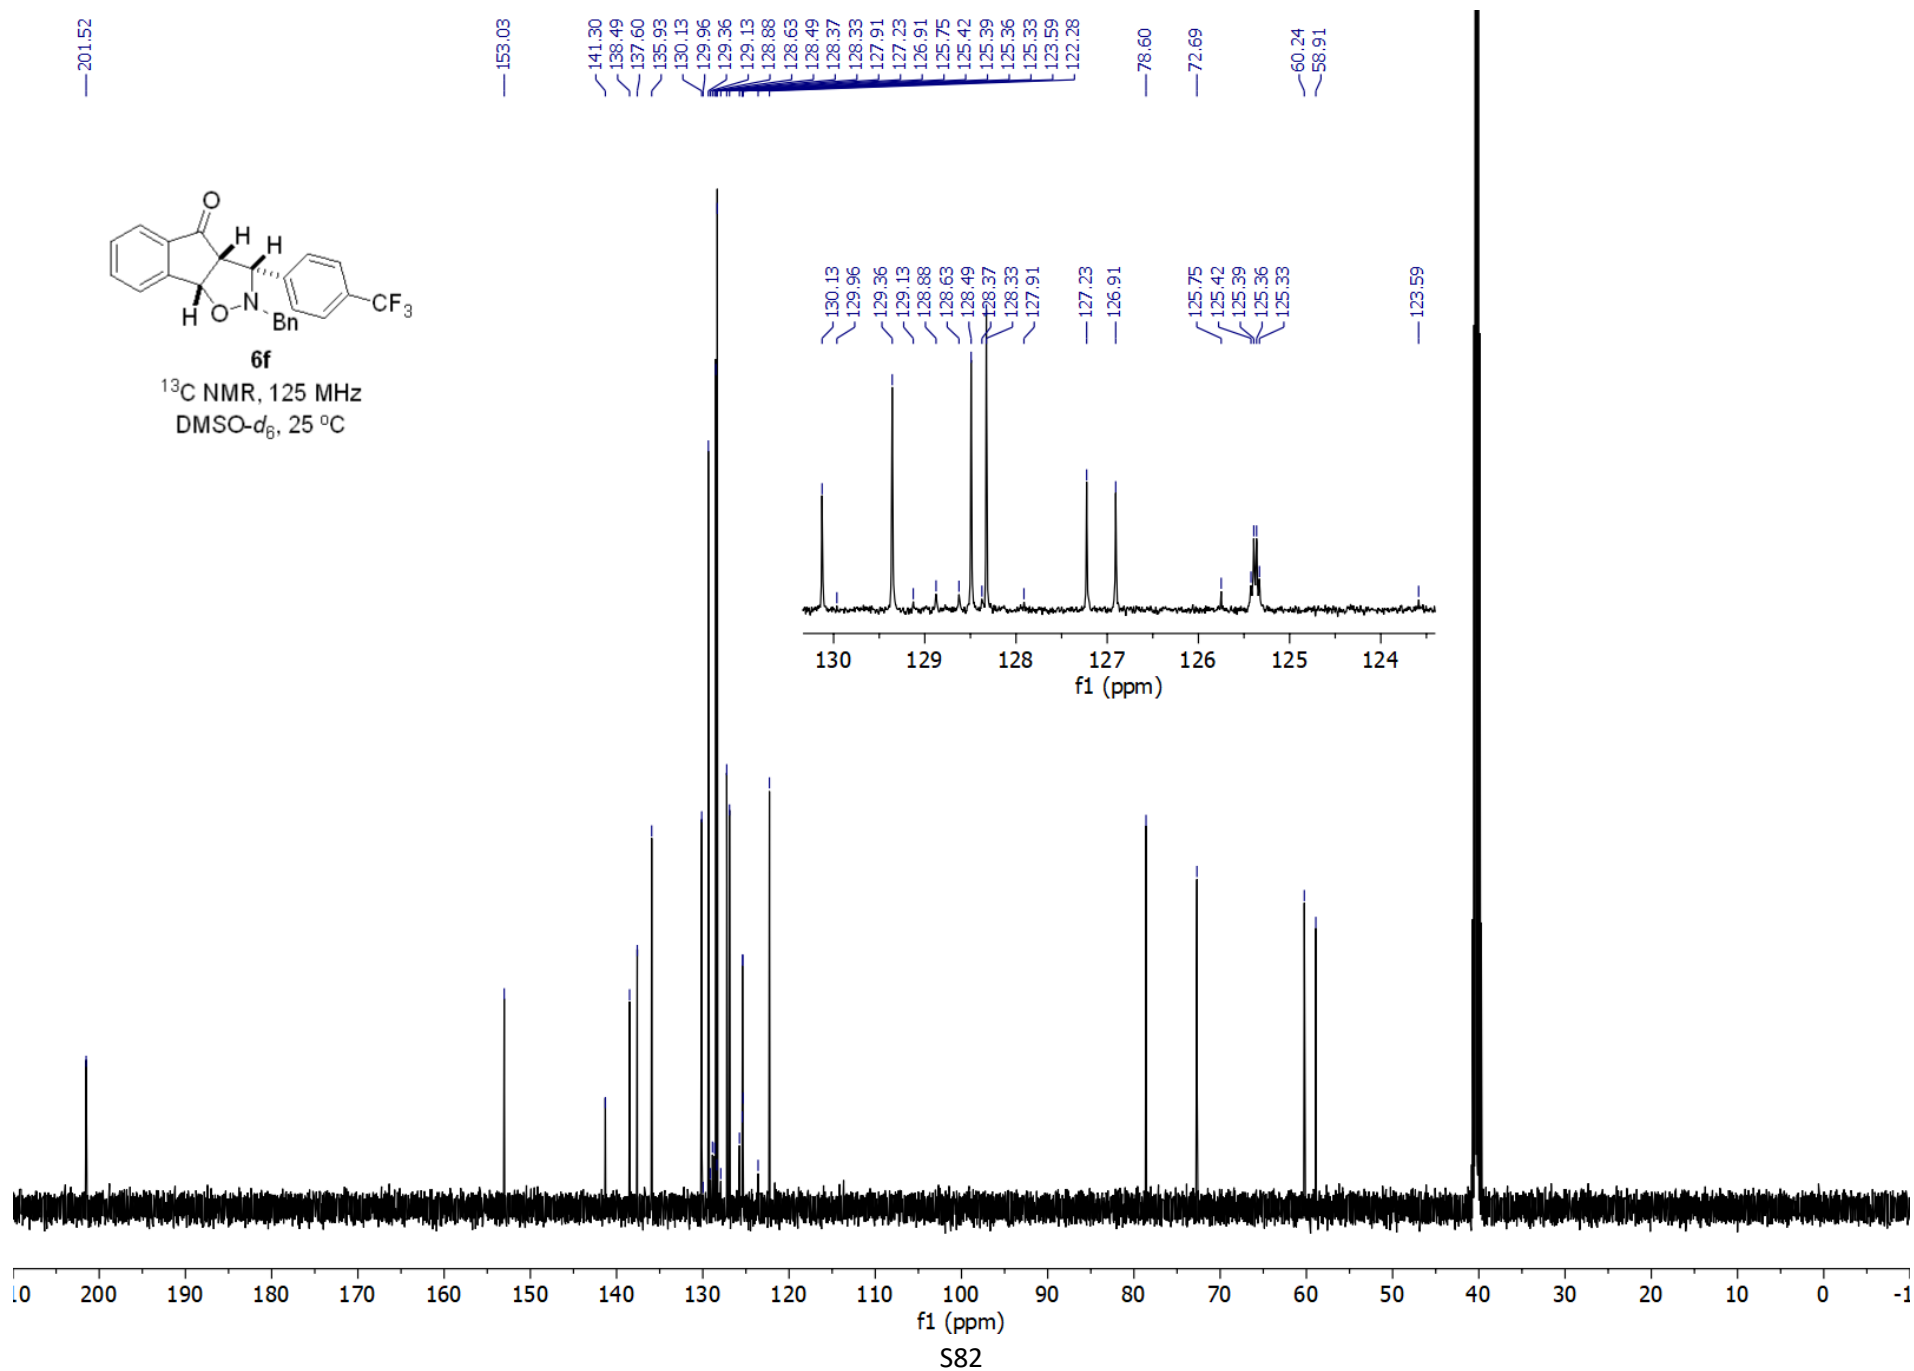

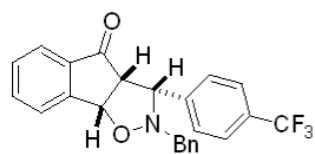

**6f**

$^{19}\text{F}$  NMR, 470 MHz

DMSO- $d_6$ , 25 °C

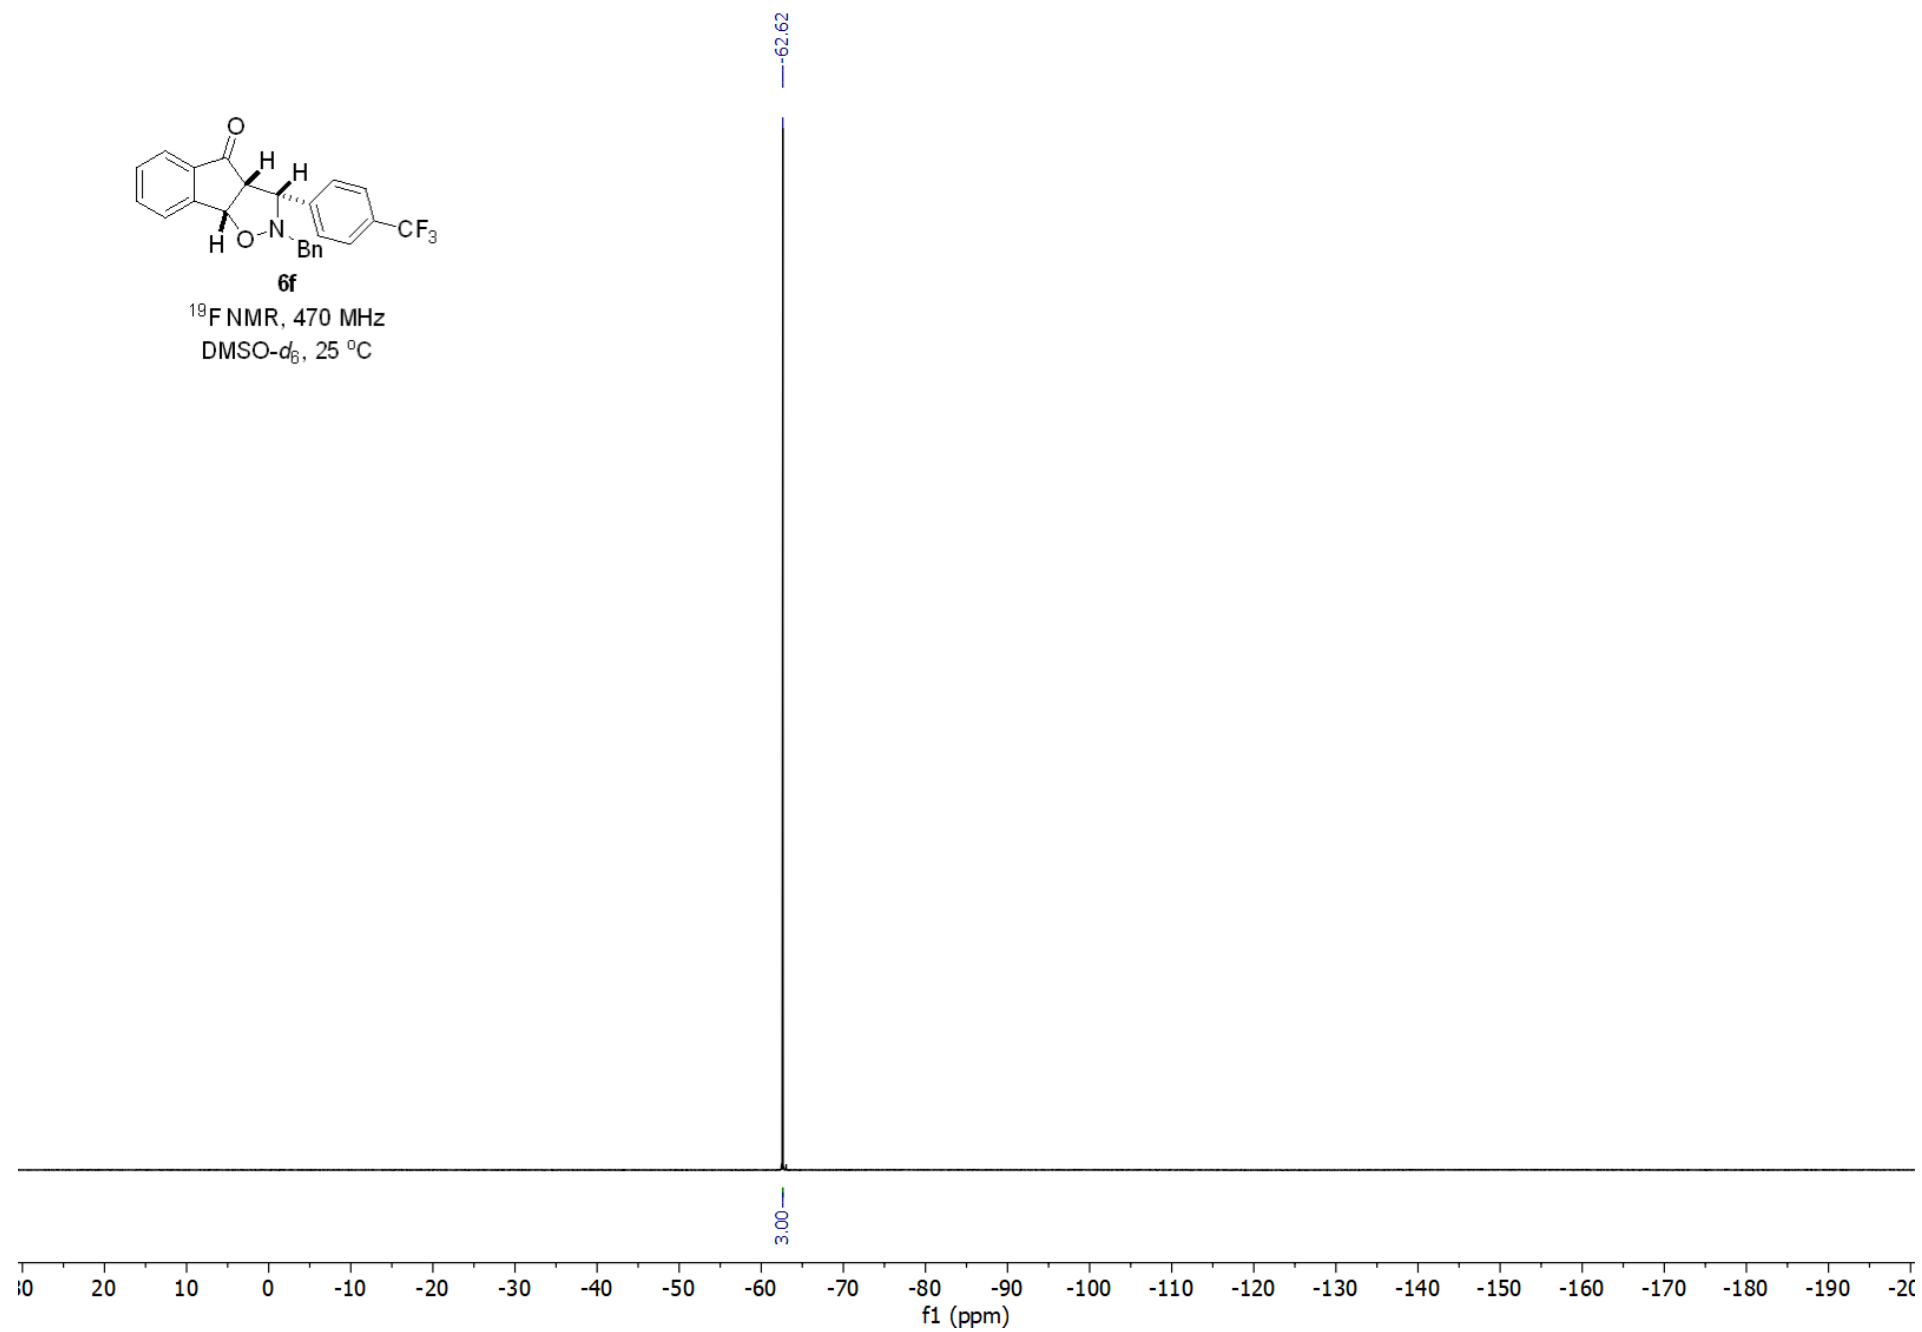

S83

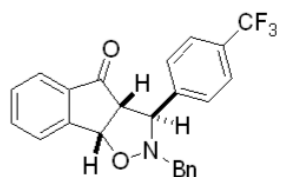

**7f**

$^1\text{H}$  NMR, 500 MHz  
DMSO- $d_6$ , 60  $^\circ\text{C}$

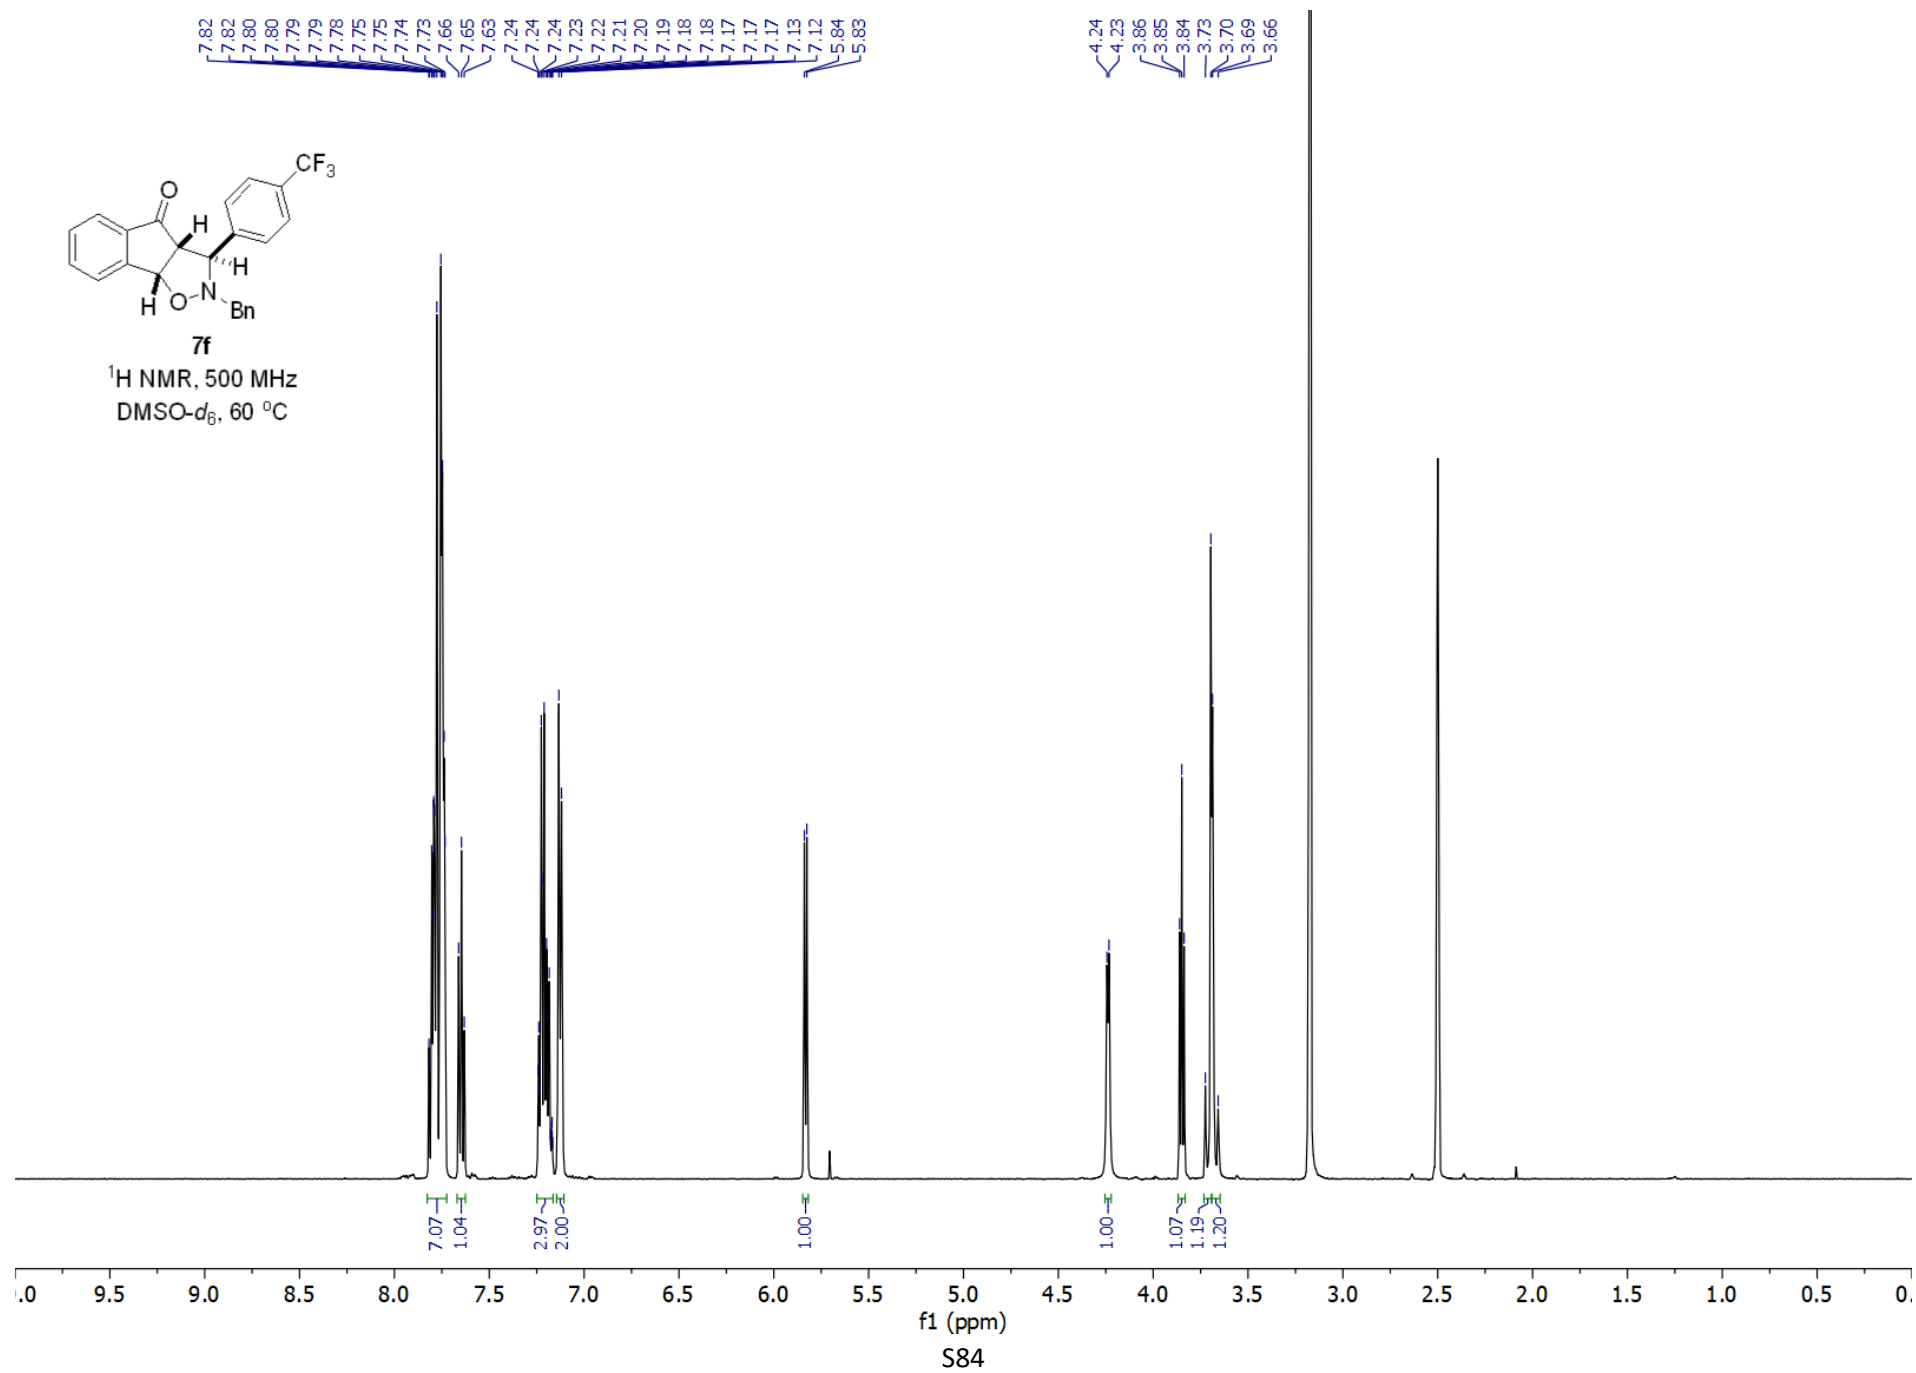

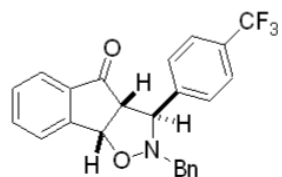

**7f**  
 $^{13}\text{C}$  NMR, 125 MHz  
 DMSO- $d_6$ , 60 °C

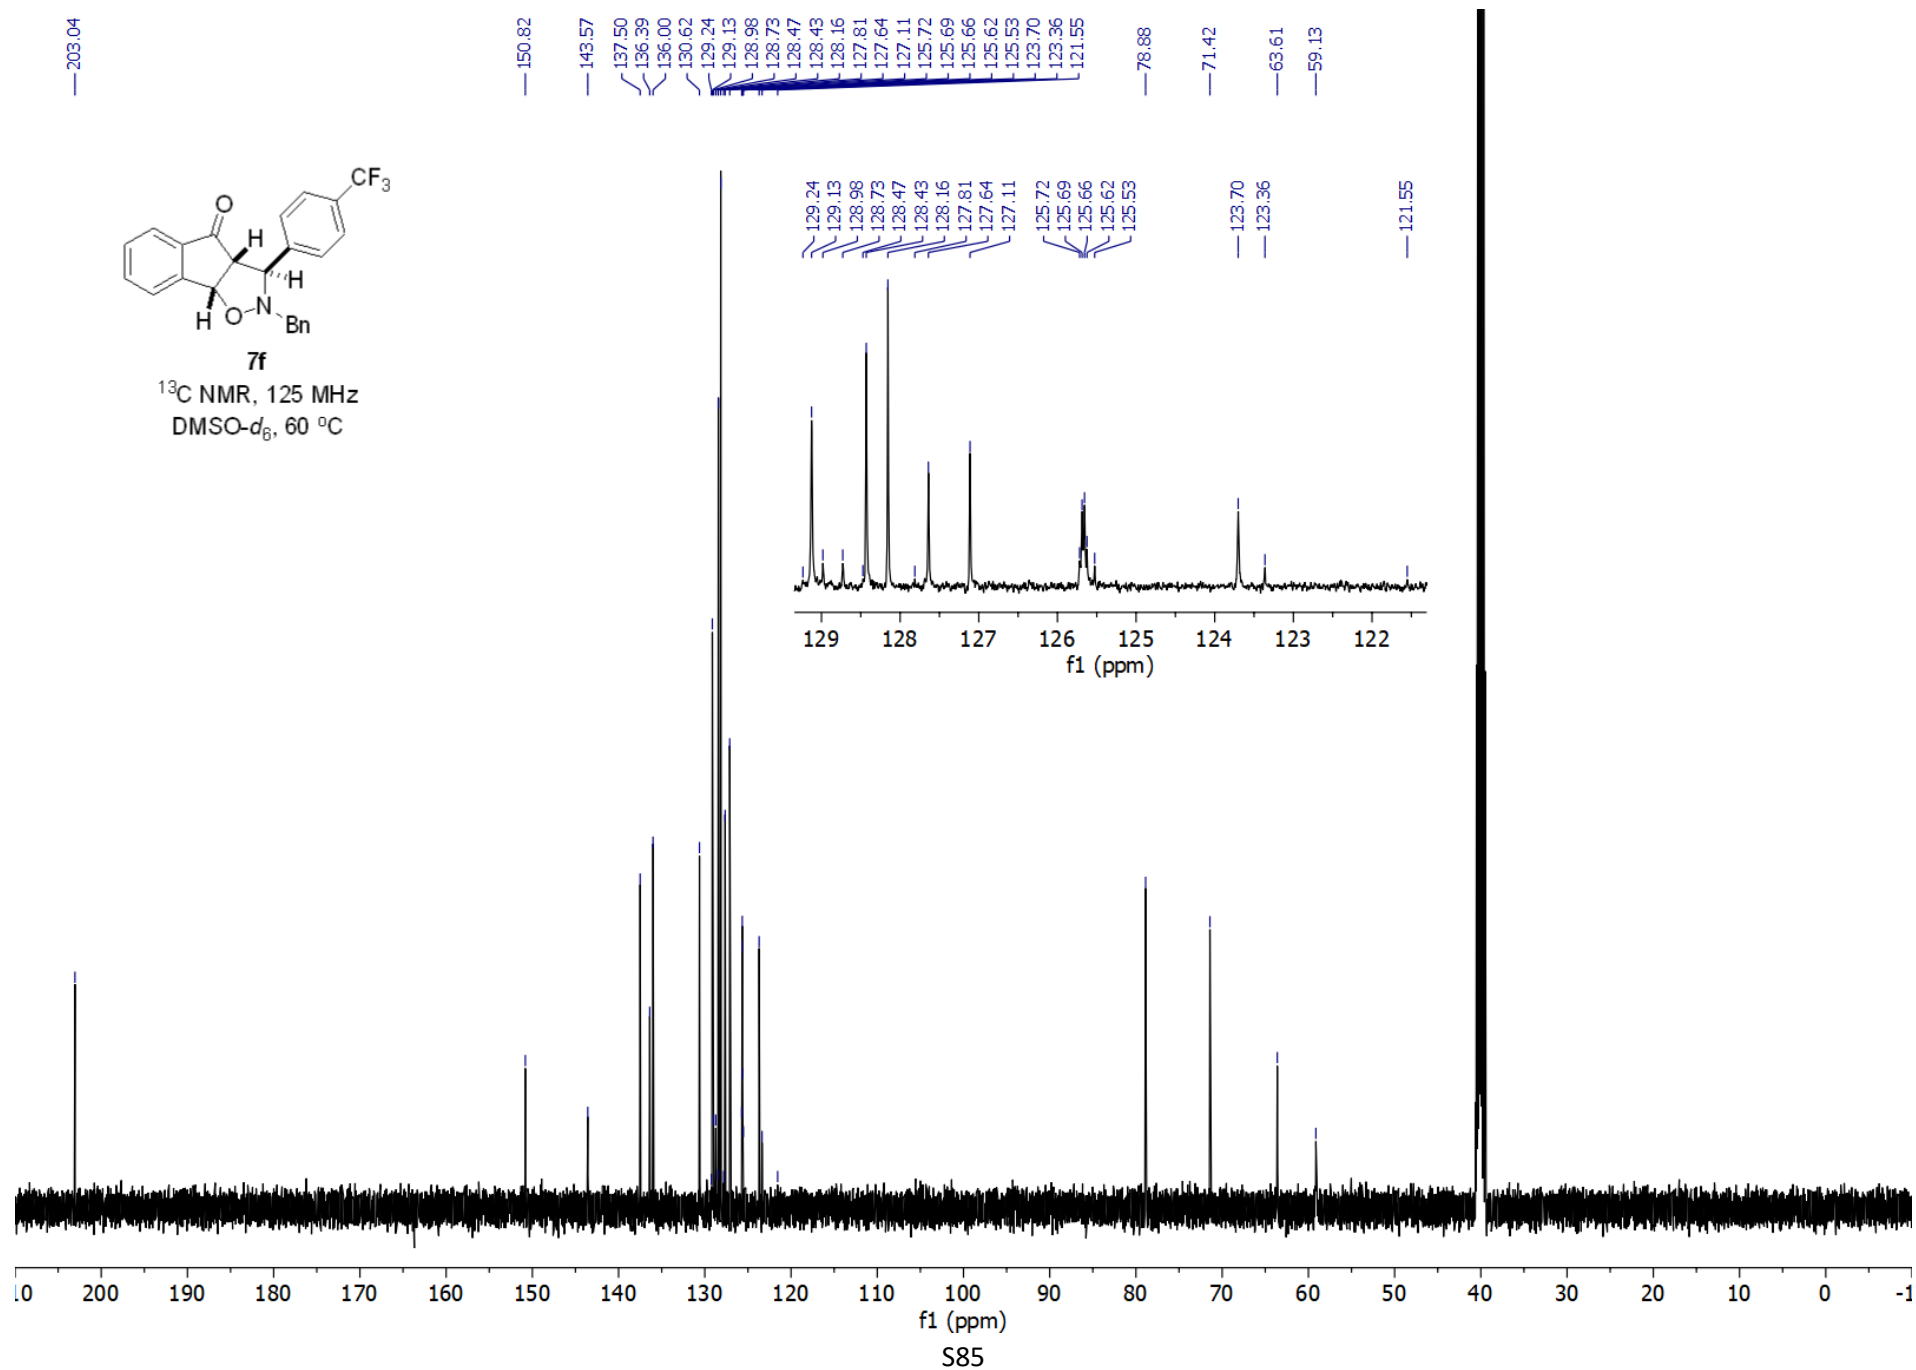

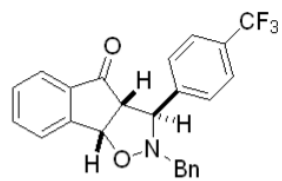

**7f**

$^{19}\text{F}$  NMR, 470 MHz

$\text{DMSO-}d_6$ , 25  $^{\circ}\text{C}$

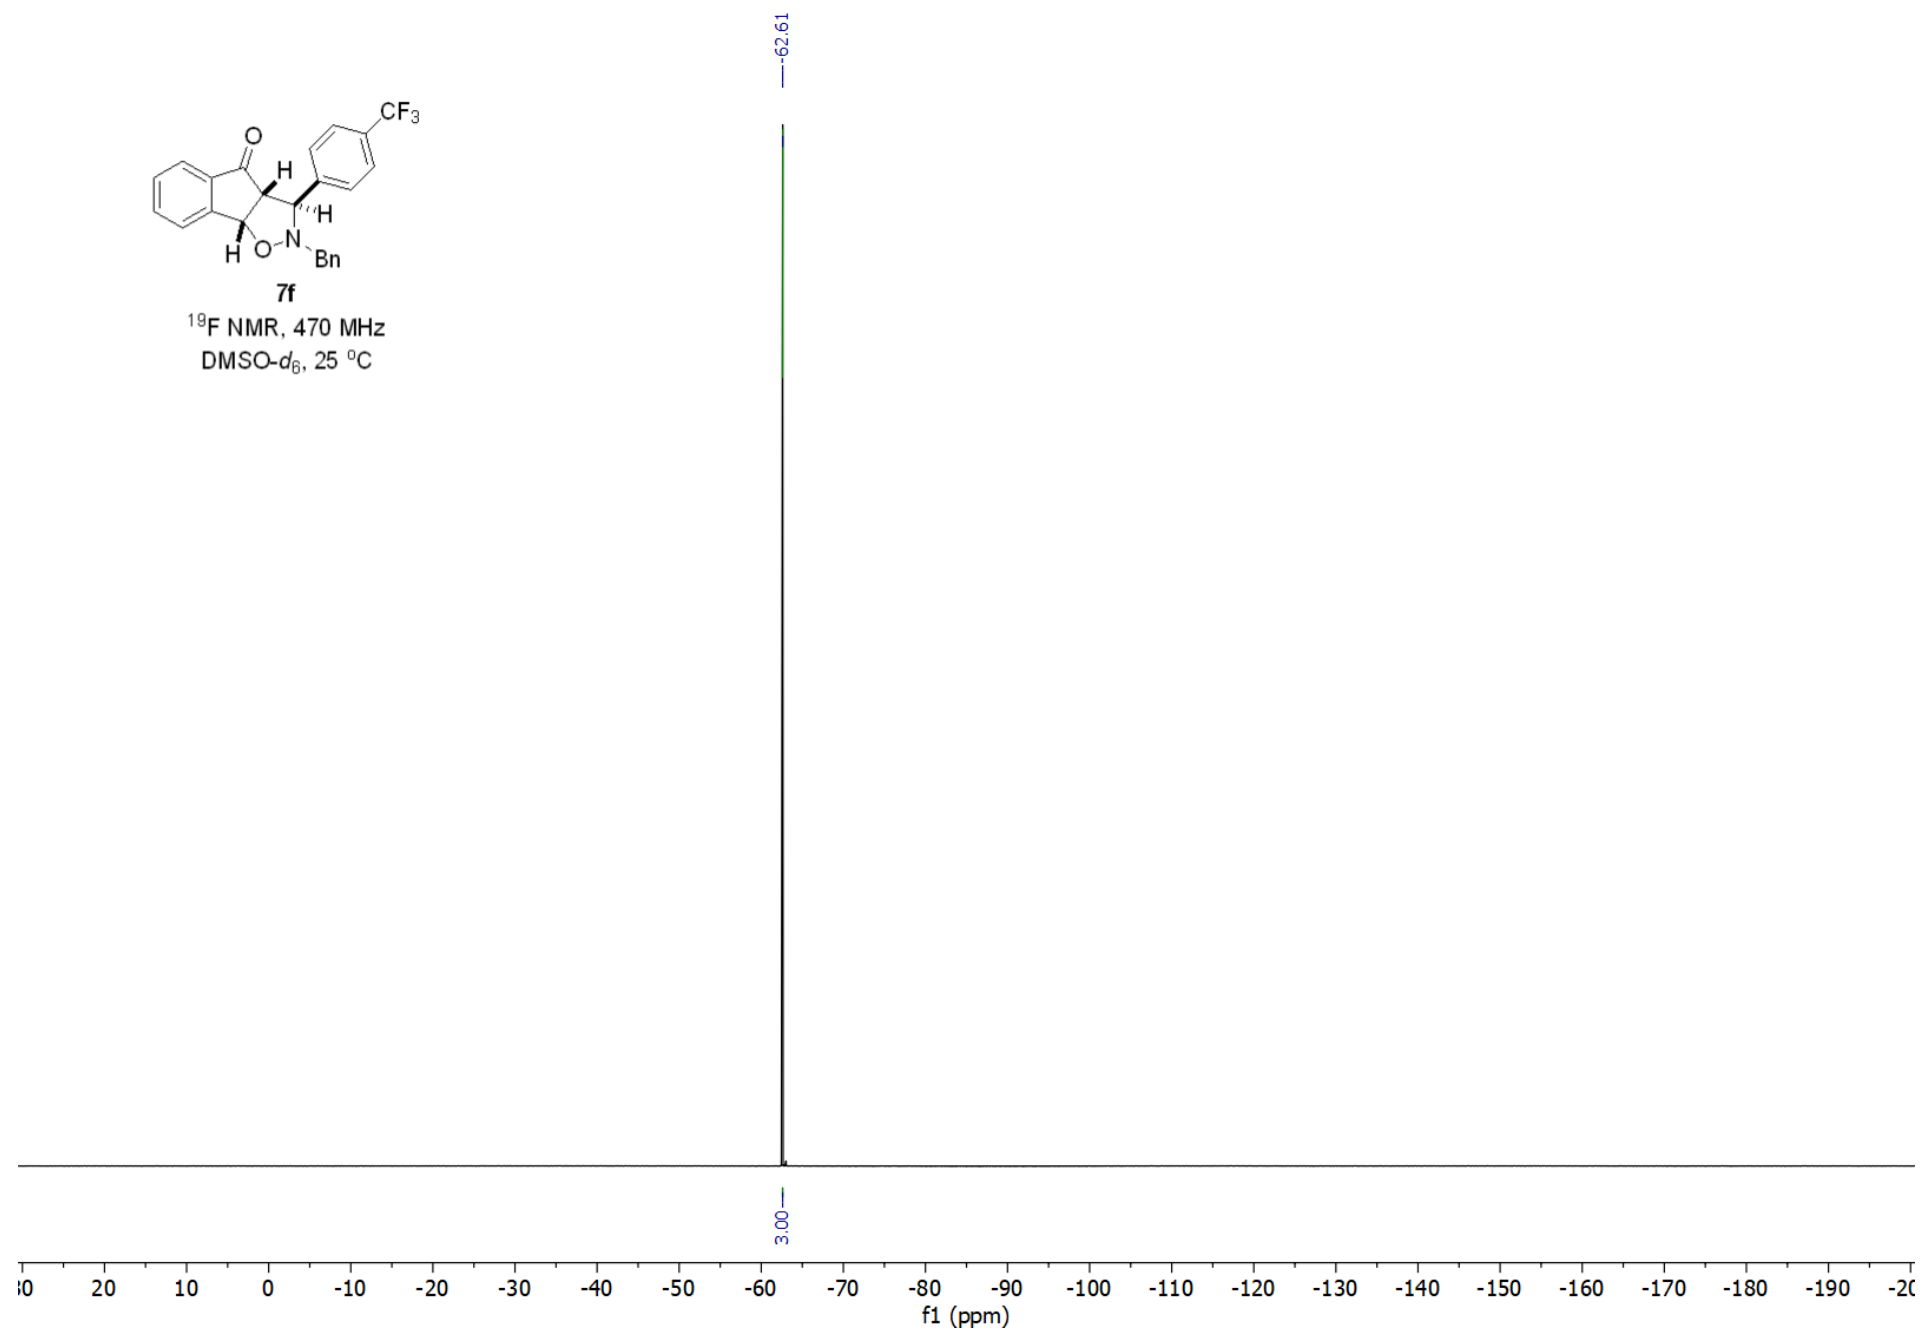

S86

7.83  
7.83  
7.82  
7.82  
7.80  
7.80  
7.78  
7.77  
7.77  
7.77  
7.76  
7.76  
7.75  
7.74  
7.74  
7.73  
7.73  
7.73  
7.60  
7.59  
7.58  
7.58  
7.57  
7.57  
7.55  
7.55  
7.55  
7.54  
7.53  
7.53  
7.49  
7.48  
7.48  
7.47  
7.47  
7.46  
7.46  
7.46  
7.45  
7.45  
7.44  
7.44  
7.44  
7.22  
7.22  
7.22  
7.21  
7.21  
7.20  
7.20  
7.20  
7.19  
7.19  
7.18  
7.18  
7.17  
7.16  
7.16  
7.16  
7.15  
7.15  
7.14  
7.13  
7.13  
7.12  
7.12  
7.11  
7.11  
7.10  
7.09  
7.09  
5.82  
5.81  
4.39  
4.37  
3.82  
3.81  
3.79  
3.76  
3.73

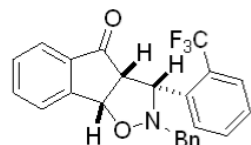

**6g**

$^1\text{H}$  NMR, 500 MHz

$\text{DMSO}-d_6$ , 25 °C

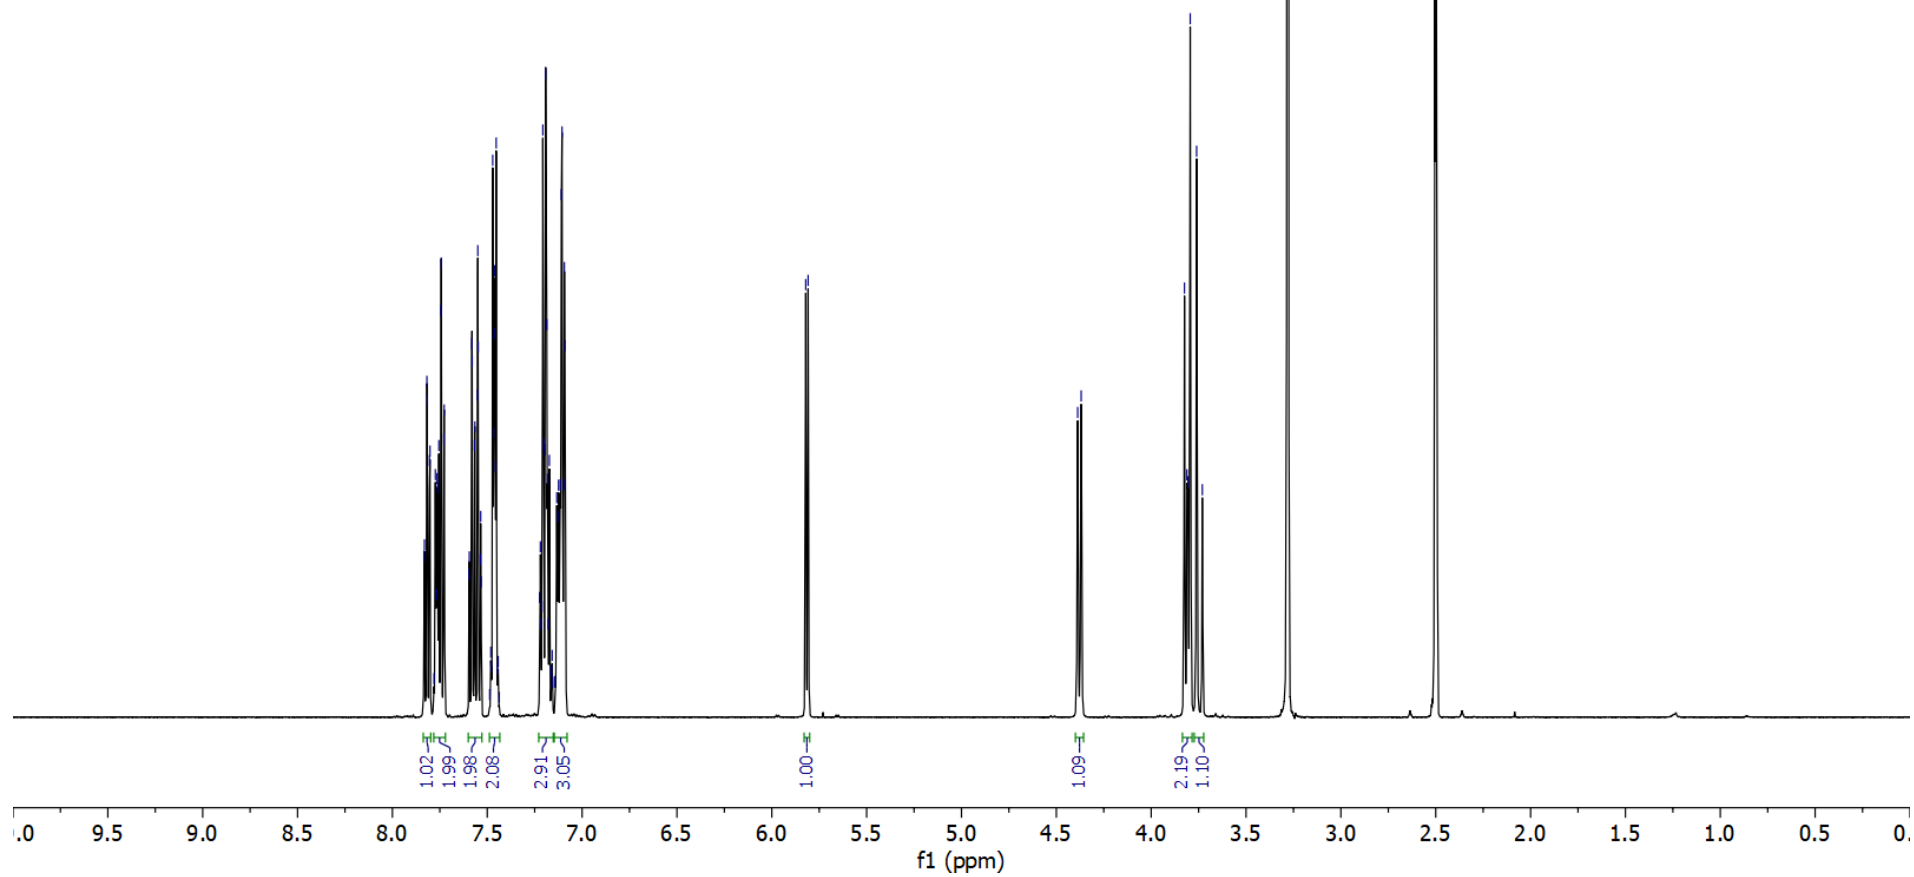

S87

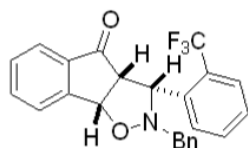

**6g**

$^{13}\text{C}$  NMR, 125 MHz  
DMSO- $d_6$ , 25 °C

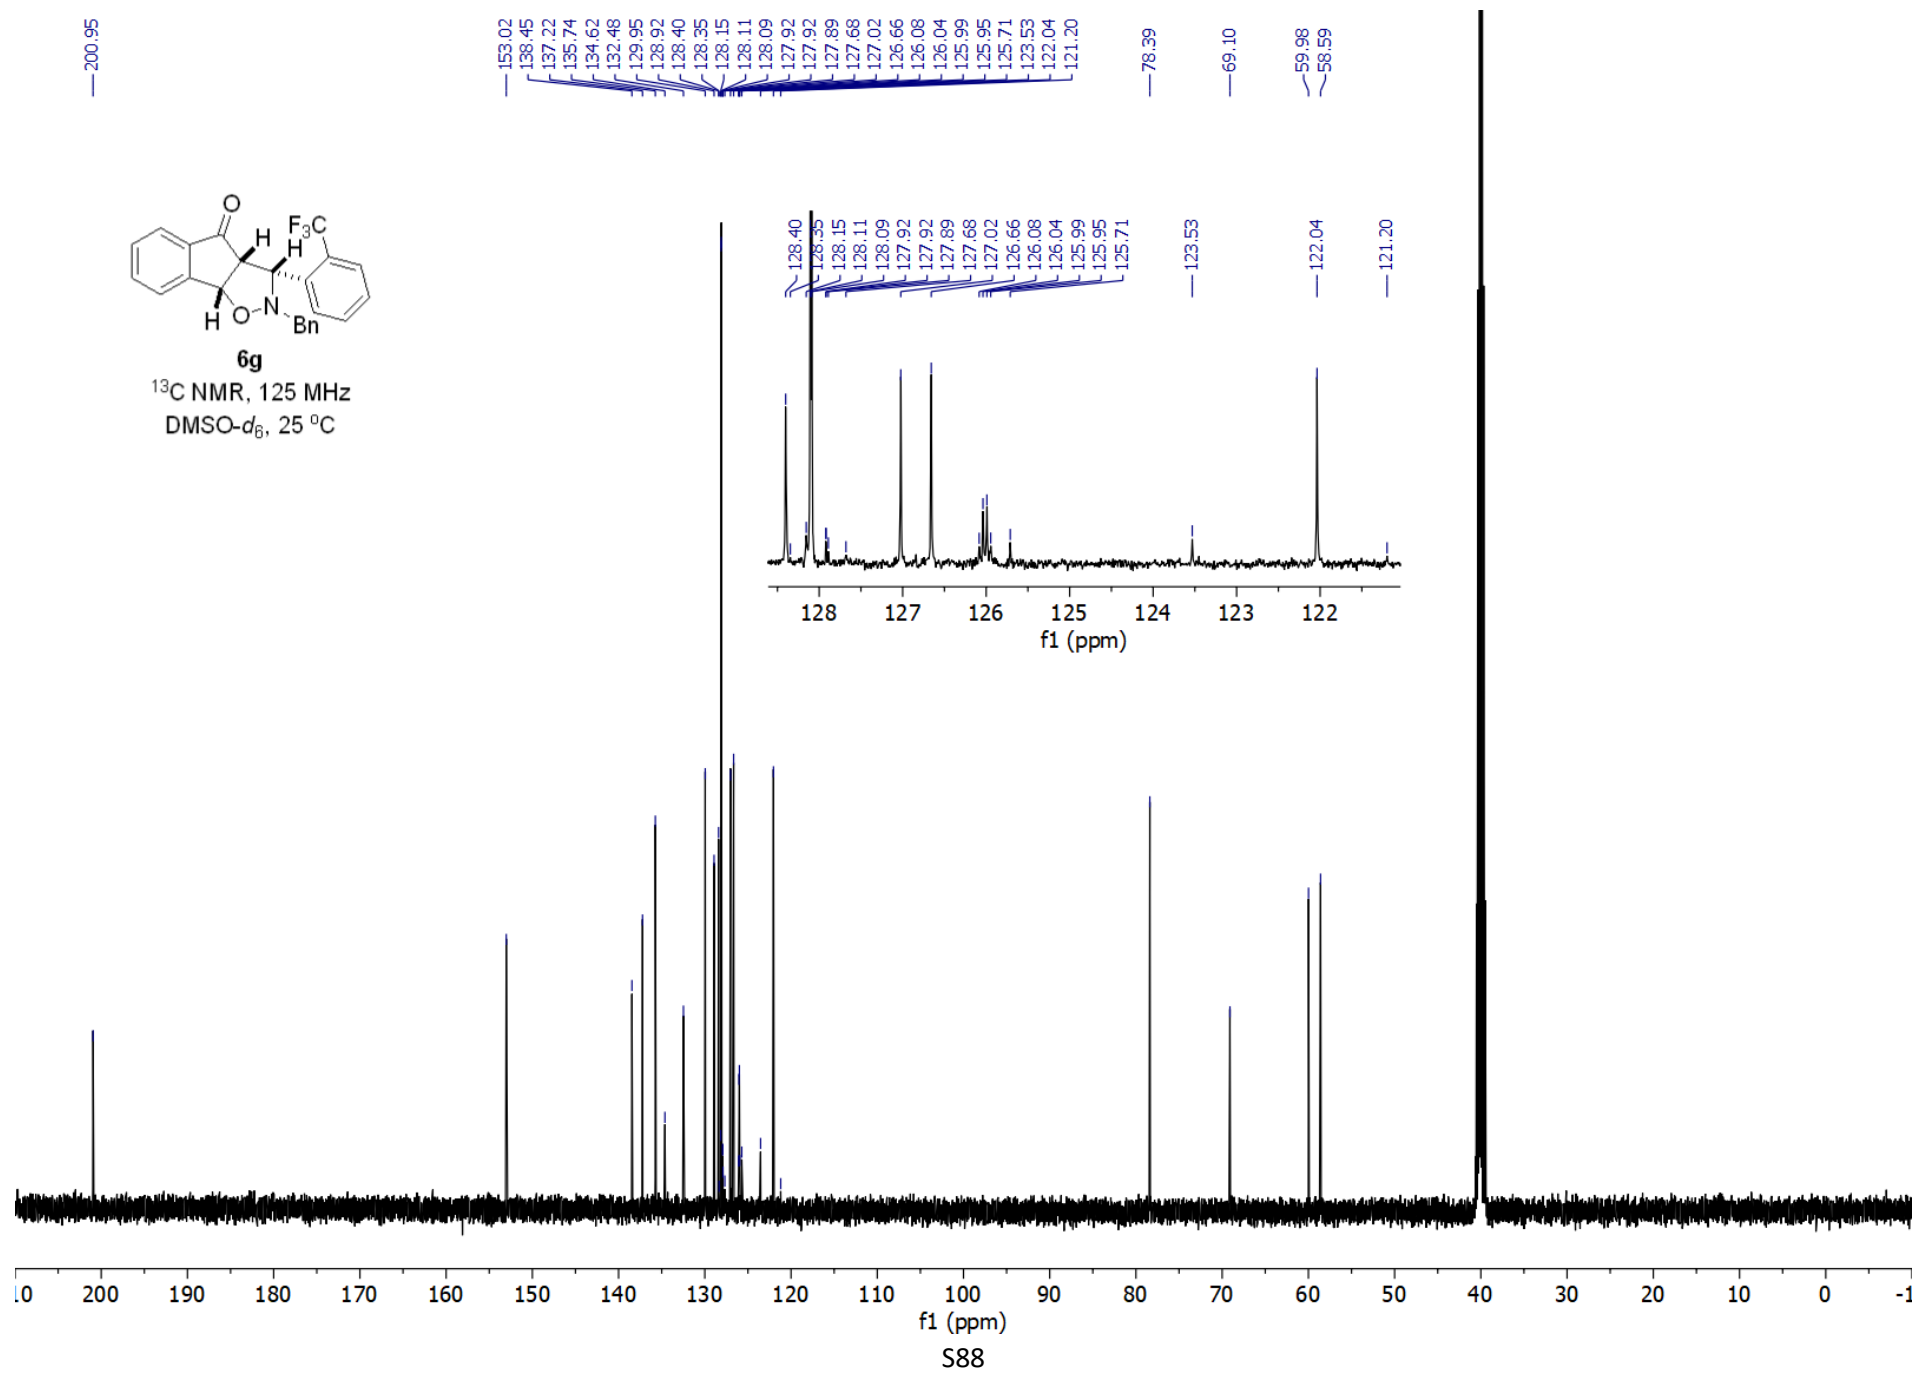

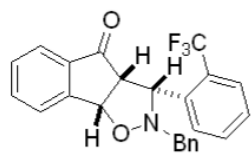

**6g**

$^{19}\text{F}$  NMR, 470 MHz

$\text{DMSO-}d_6$ , 25  $^{\circ}\text{C}$

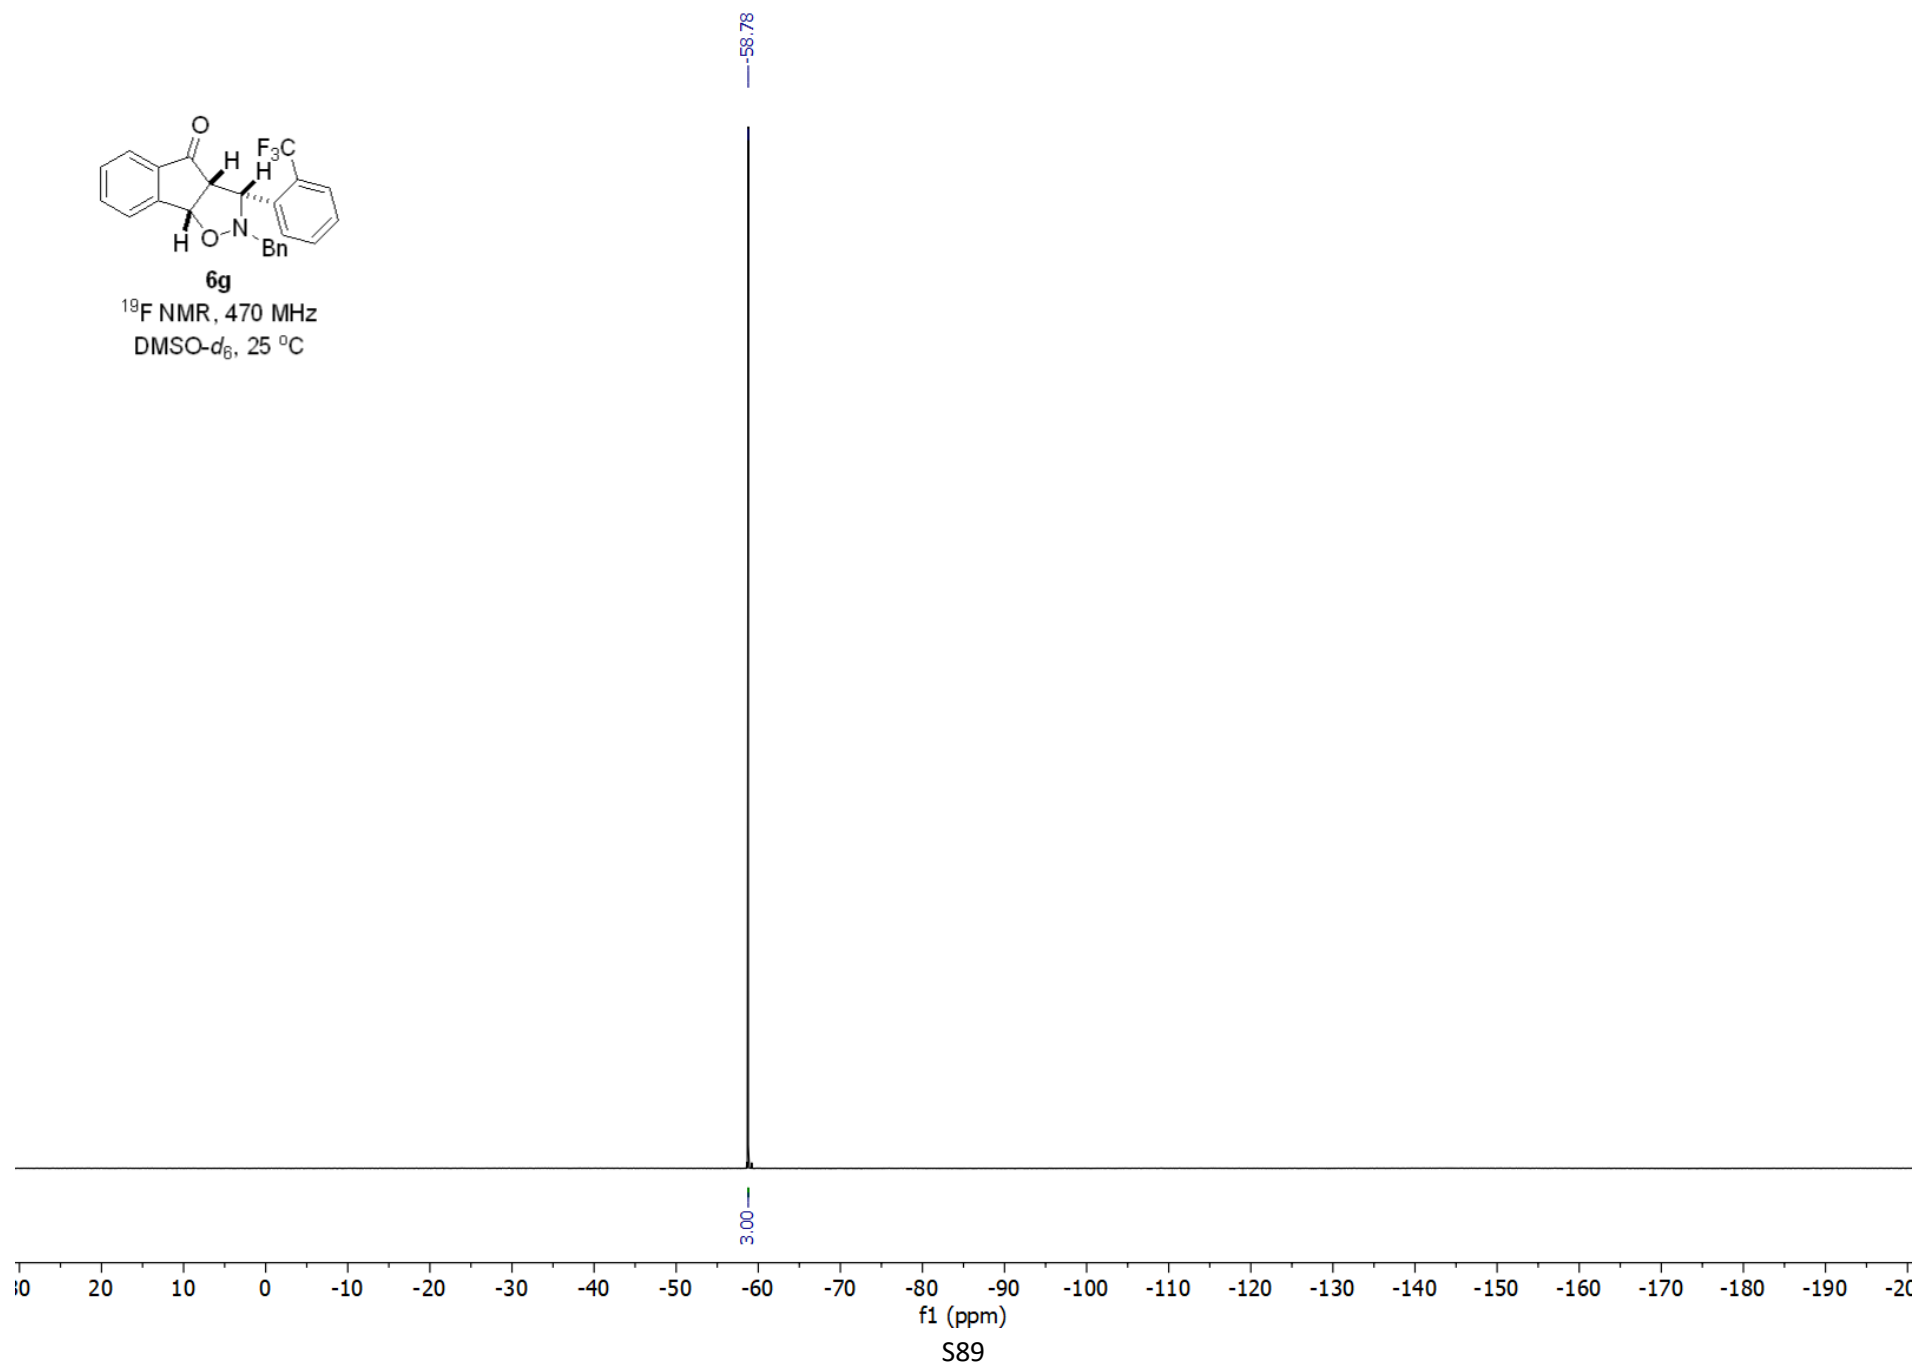

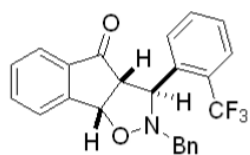

7g

$^1\text{H}$  NMR, 500 MHz

$\text{DMSO-}d_6$ , 60  $^\circ\text{C}$

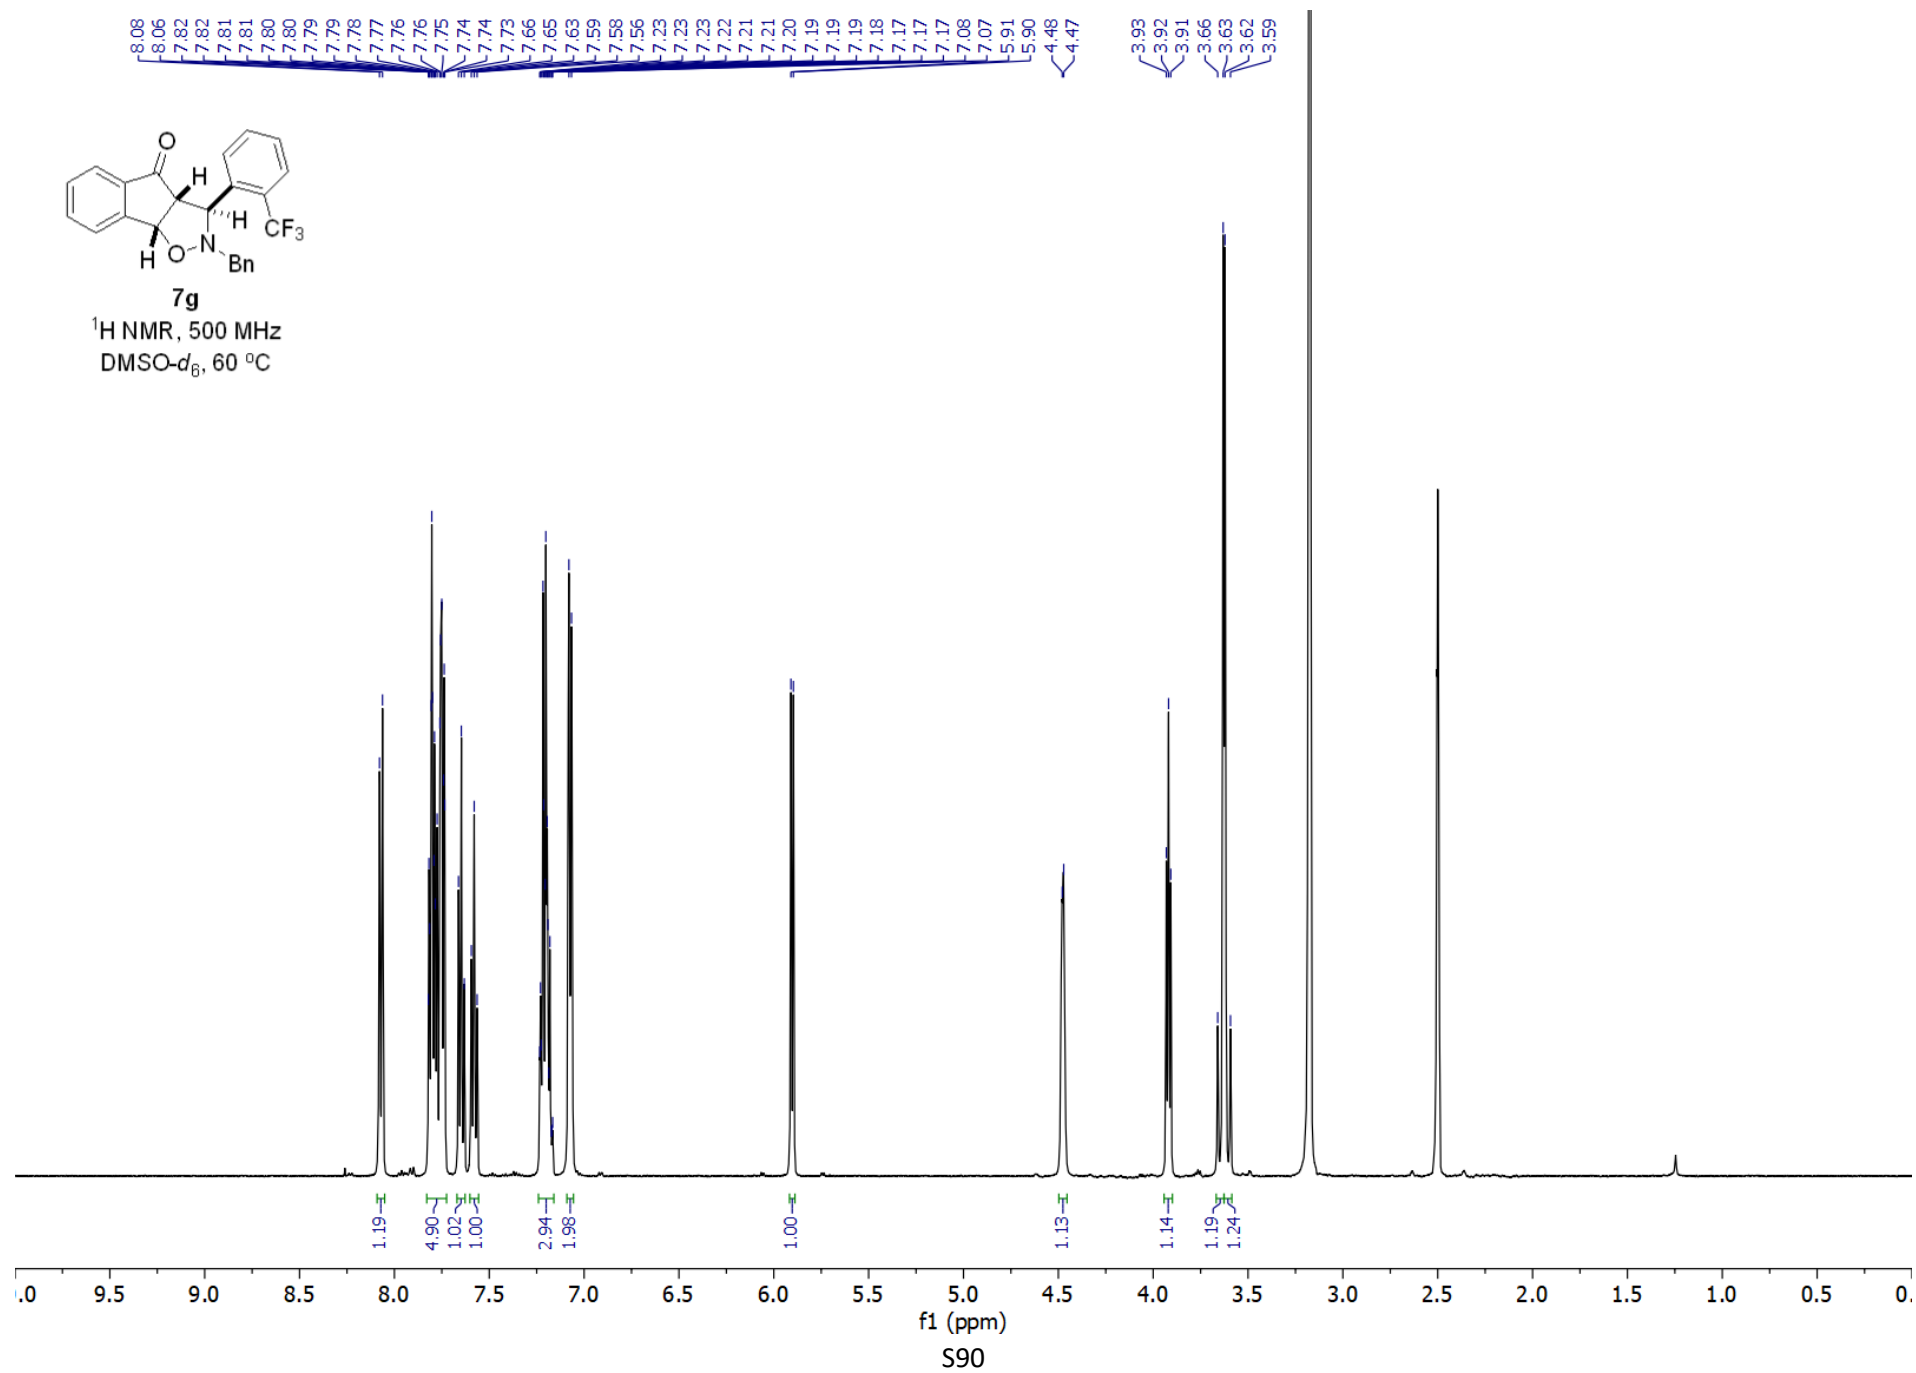

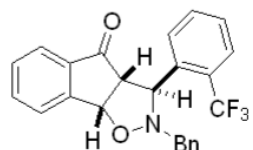

7g

<sup>13</sup>C NMR, 125 MHz  
DMSO-*d*<sub>6</sub>, 60 °C

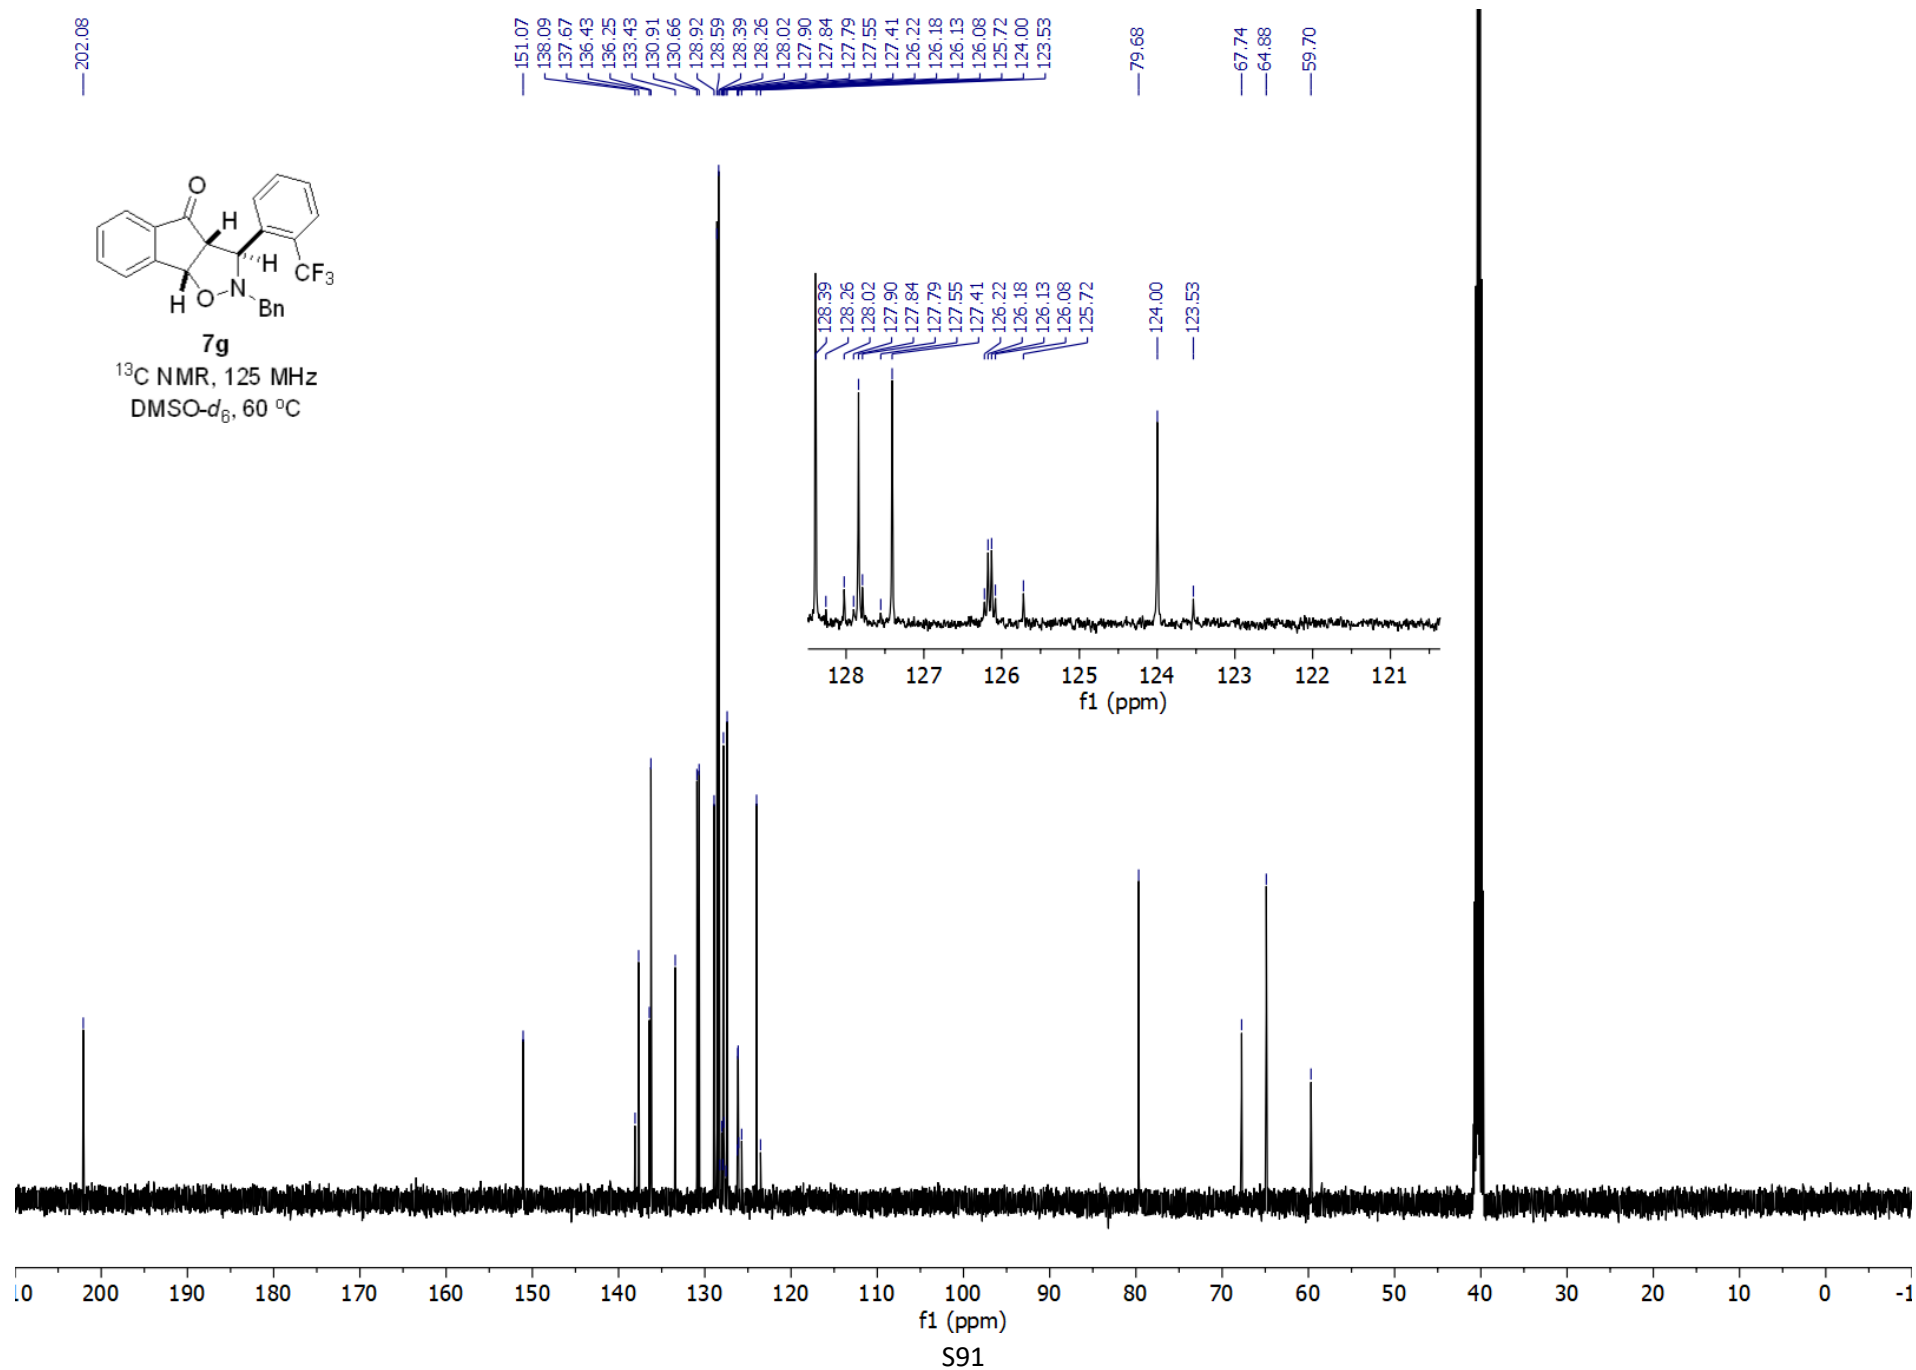

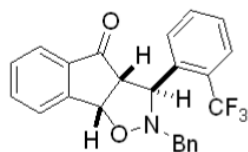

**7g**

$^{19}\text{F}$  NMR, 470 MHz  
DMSO- $d_6$ , 25  $^{\circ}\text{C}$

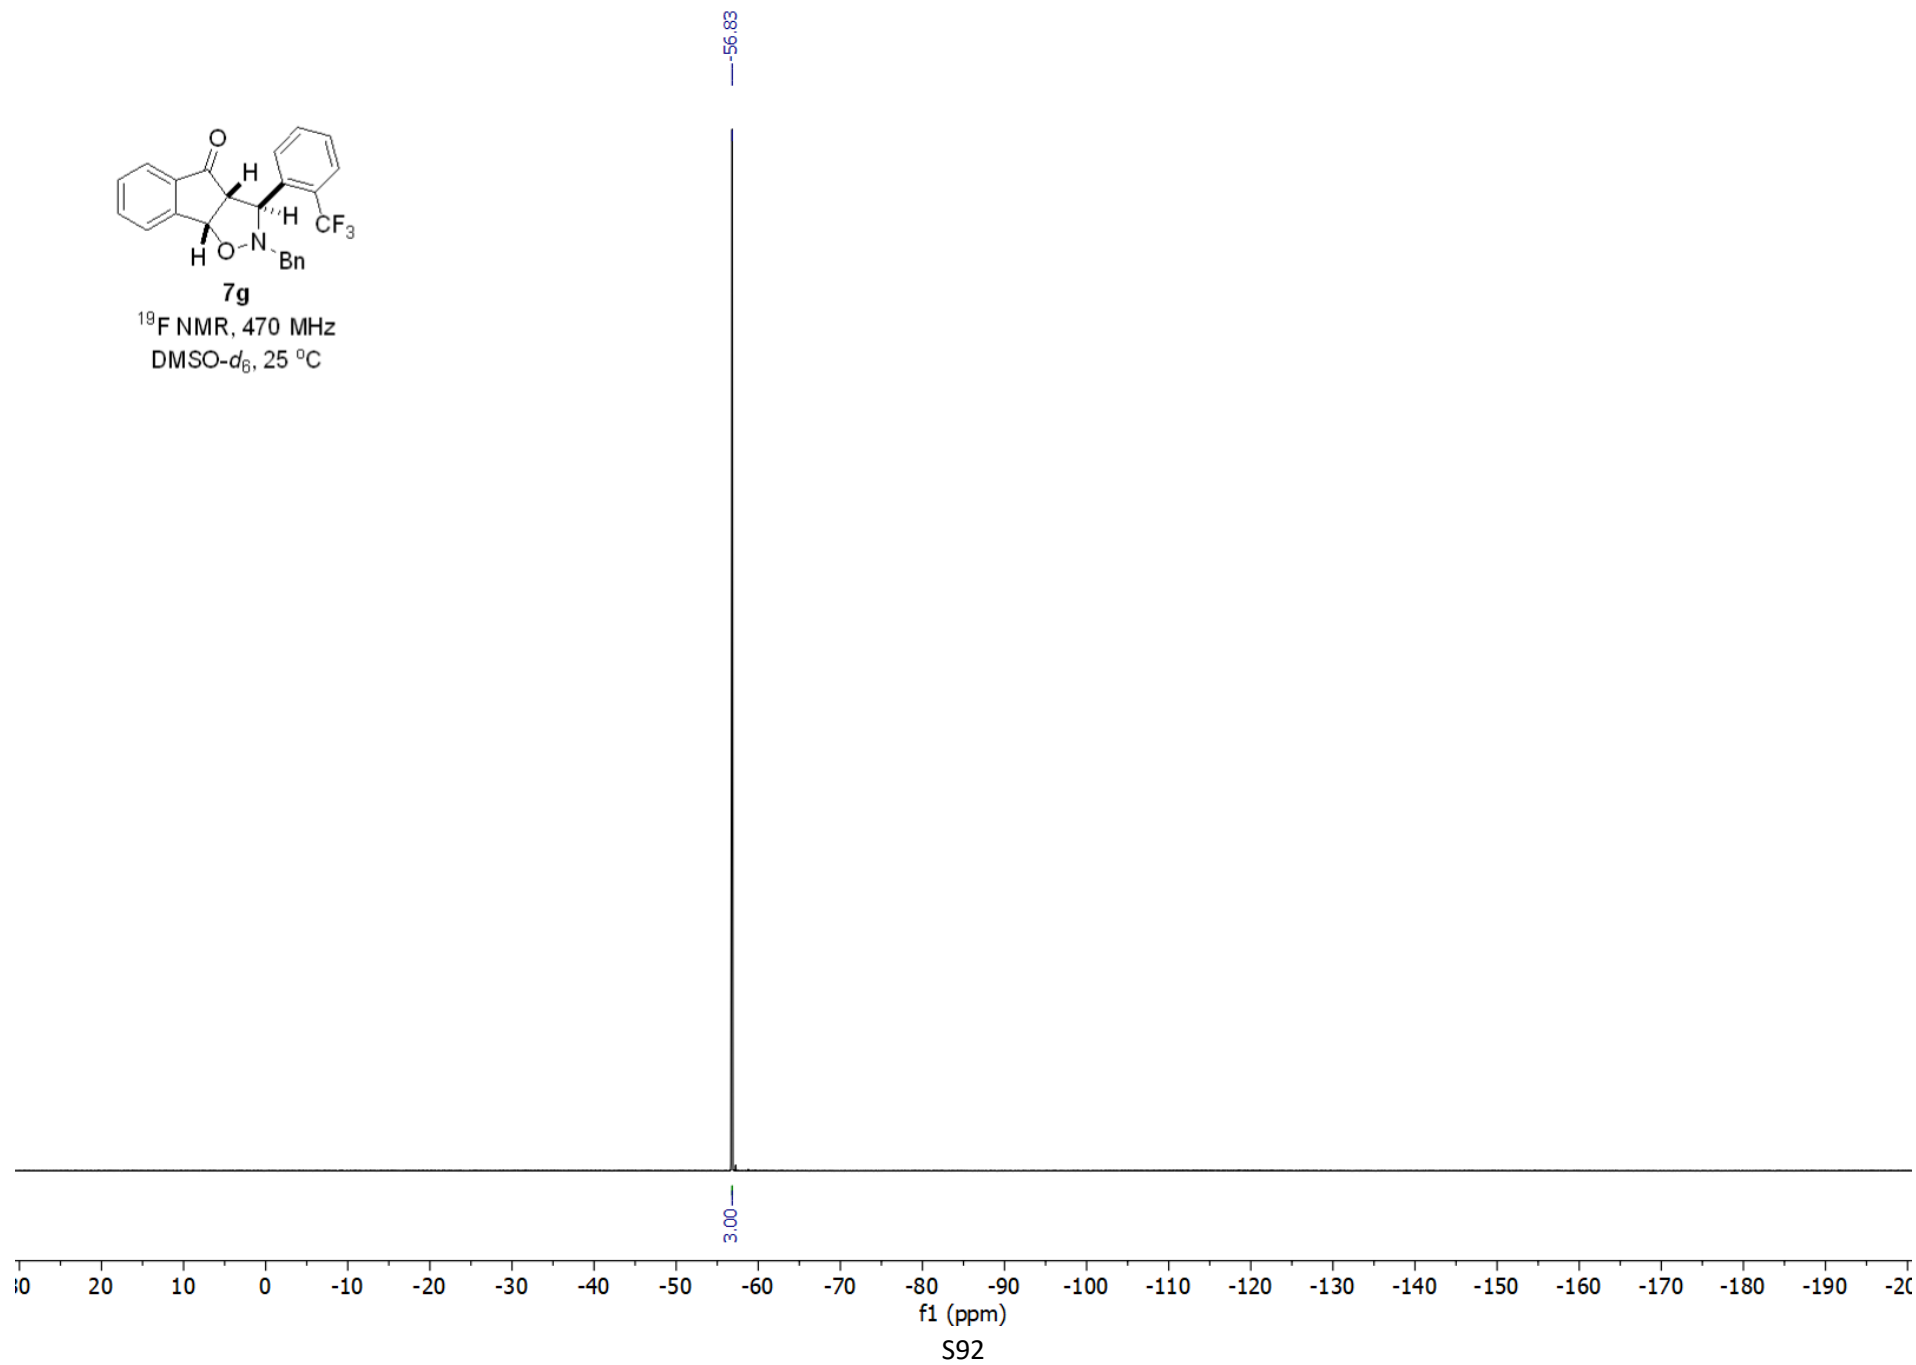

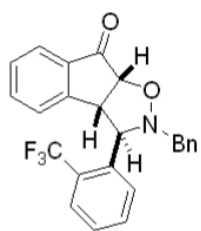

**8g**

$^1\text{H}$  NMR, 500 MHz  
DMSO- $d_6$ , 60  $^\circ\text{C}$

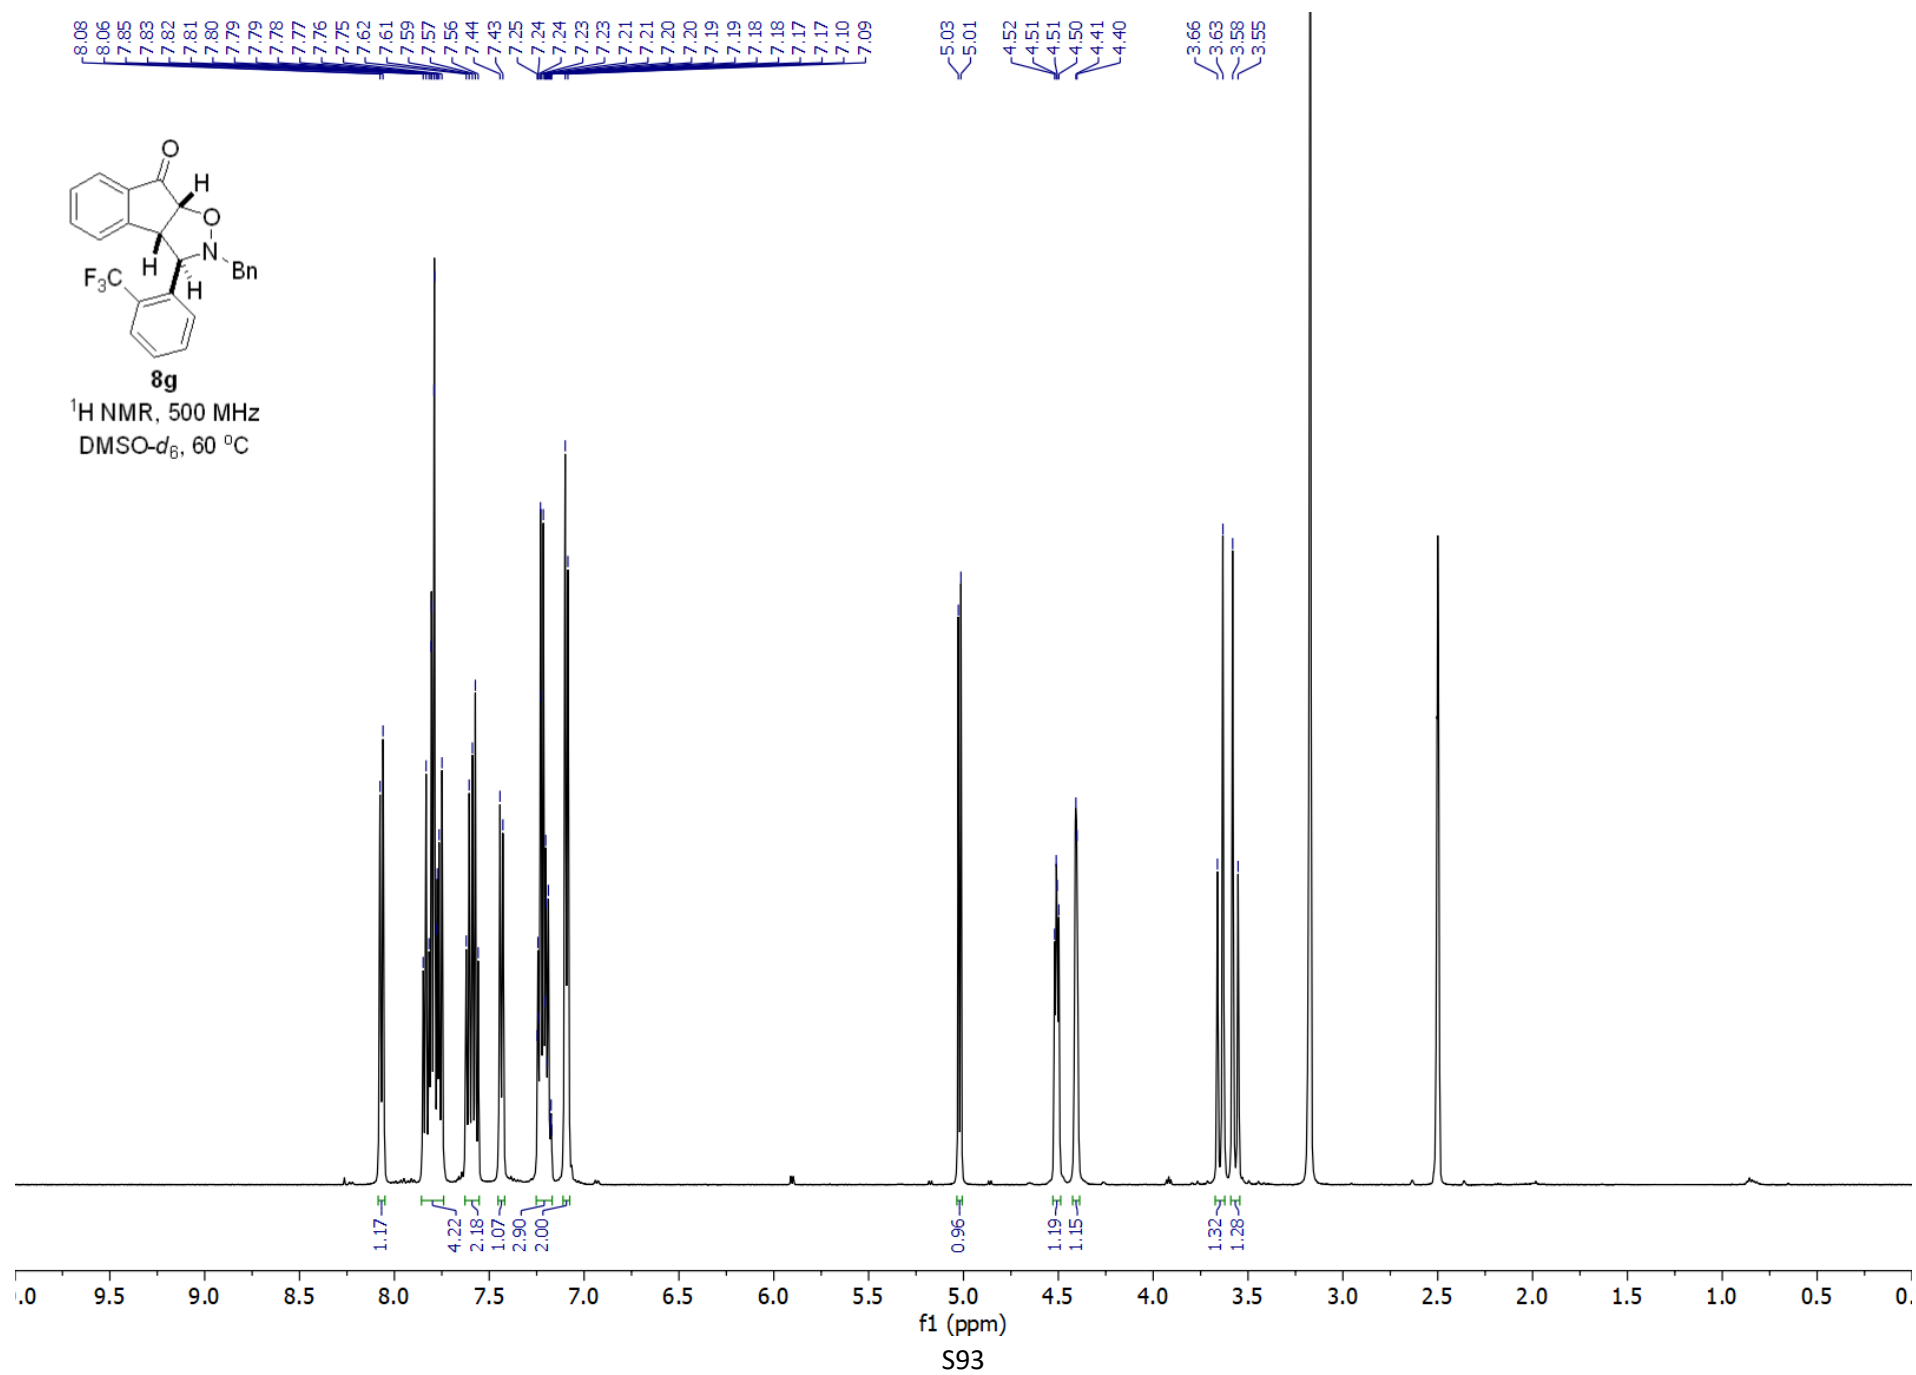

— 201.17

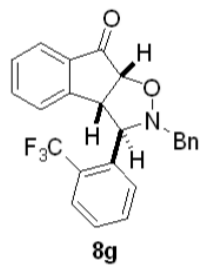

$^{13}\text{C}$  NMR, 125 MHz  
DMSO- $d_6$ , 60 °C

152.86  
137.91  
137.28  
136.57  
135.10  
133.39  
130.43  
129.39  
128.69  
128.28  
128.18  
127.77  
127.73  
127.49  
127.26  
127.18  
127.02  
126.83  
126.01  
125.96  
125.92  
125.87  
125.59  
124.23  
123.40  
121.22

— 81.79

— 70.23

— 59.25

— 57.48

128.02  
127.97  
127.74  
127.51  
127.43  
127.27  
127.08  
126.26  
126.21  
126.16  
126.12  
125.84

— 124.48

— 123.65

— 121.47

128  
127  
126  
125  
124  
123  
122  
f1 (ppm)

200  
190  
180  
170  
160  
150  
140  
130  
120  
110  
100  
90  
80  
70  
60  
50  
40  
30  
20  
10  
0  
-1  
f1 (ppm)

S94

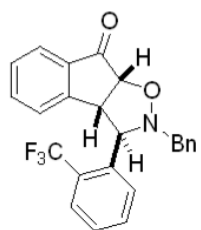

**8g**

$^{19}\text{F}$  NMR, 470 MHz  
DMSO- $d_6$ , 25 °C

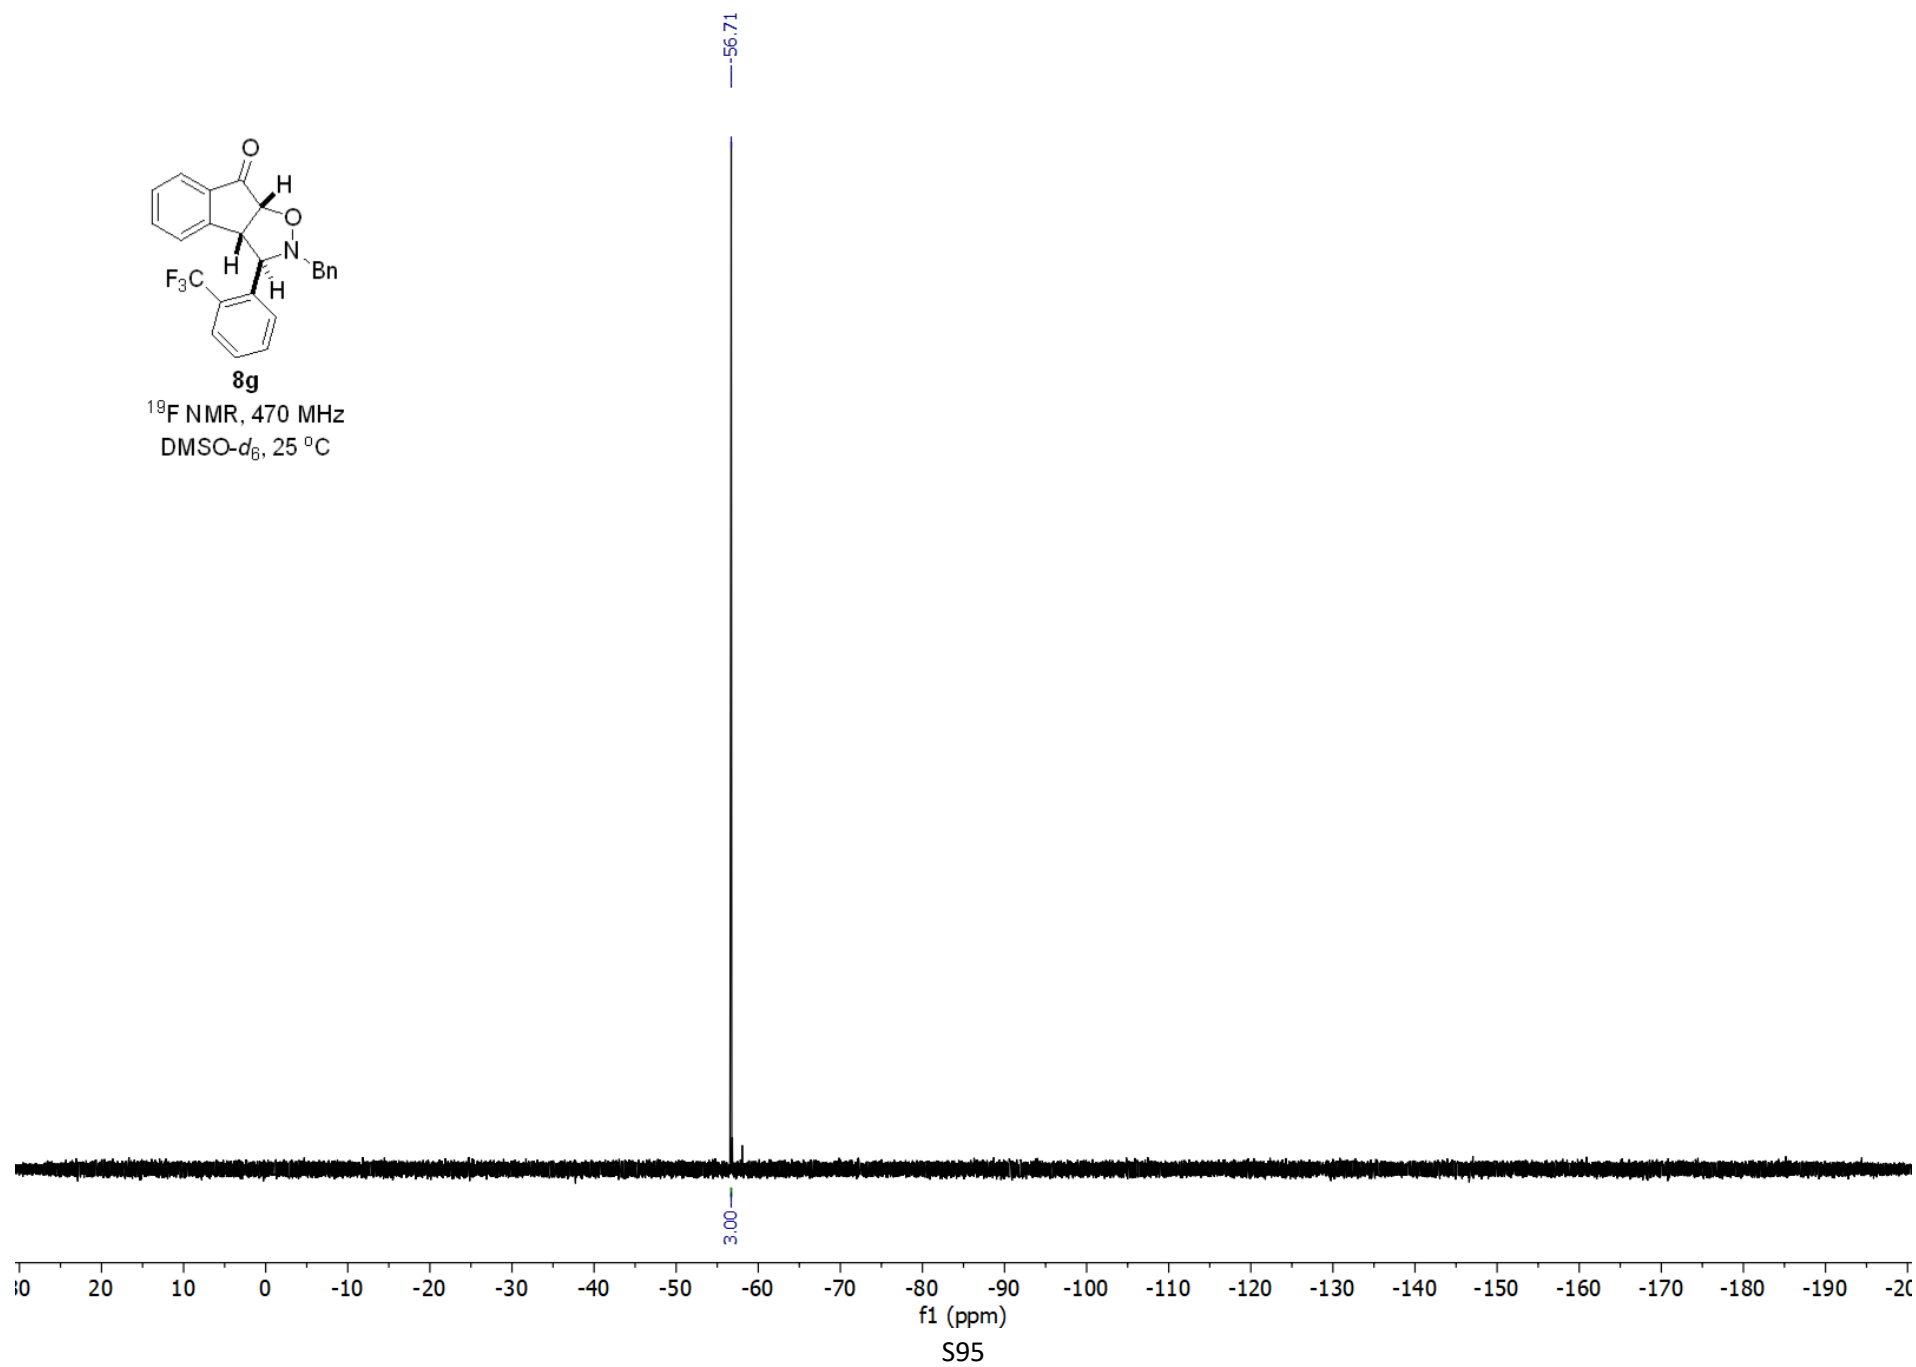

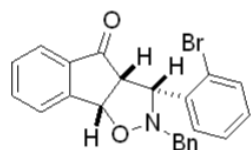

**6h**

$^1\text{H}$  NMR, 500 MHz  
DMSO- $d_6$ , 25 °C

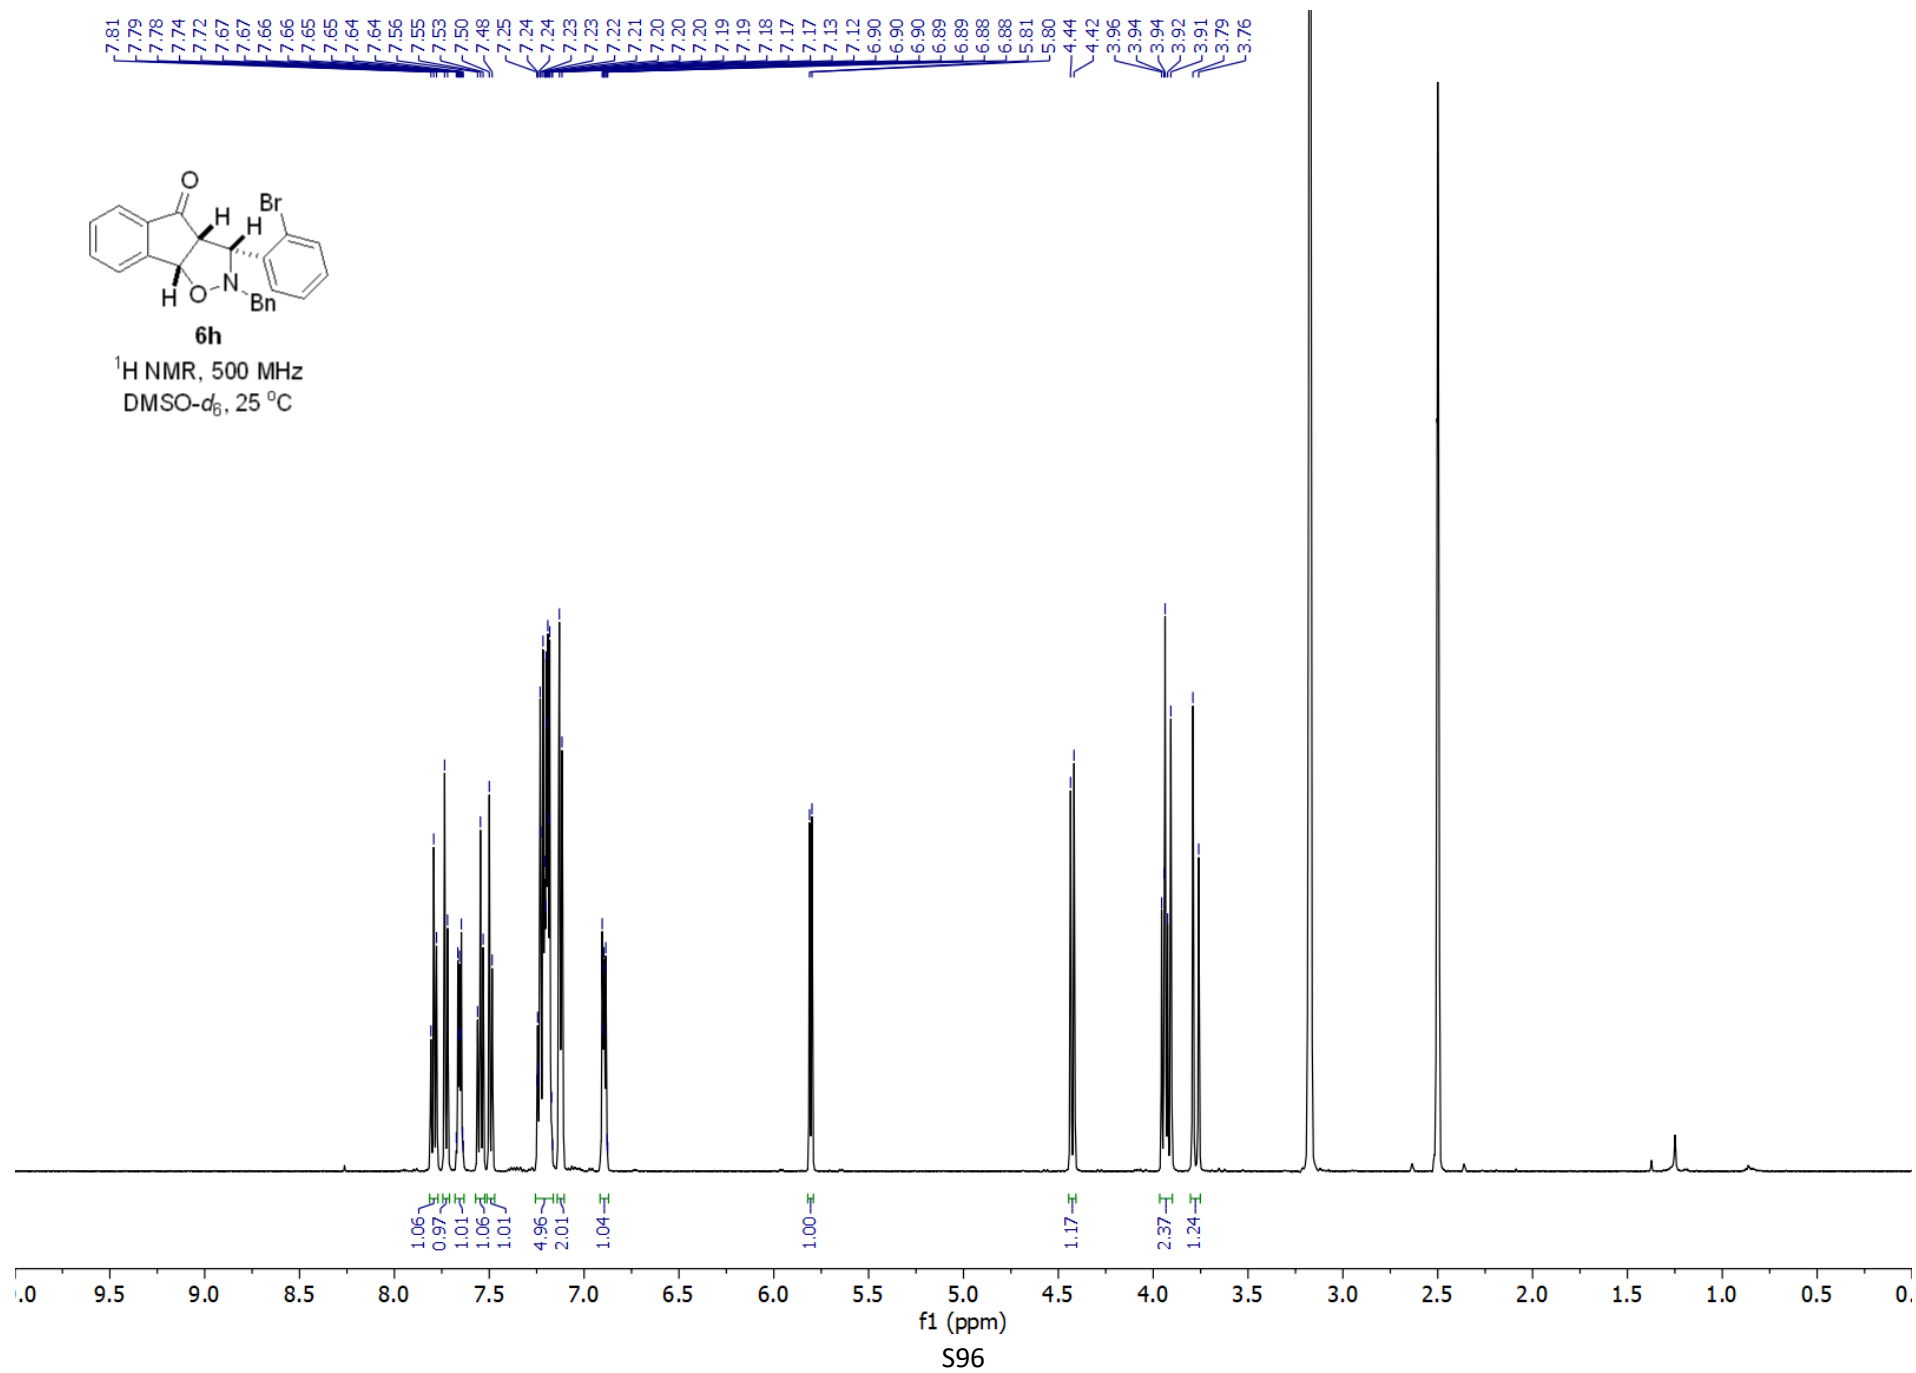

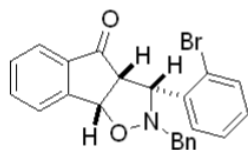

**6h**

$^{13}\text{C}$  NMR, 125 MHz  
DMSO- $d_6$ , 25 °C

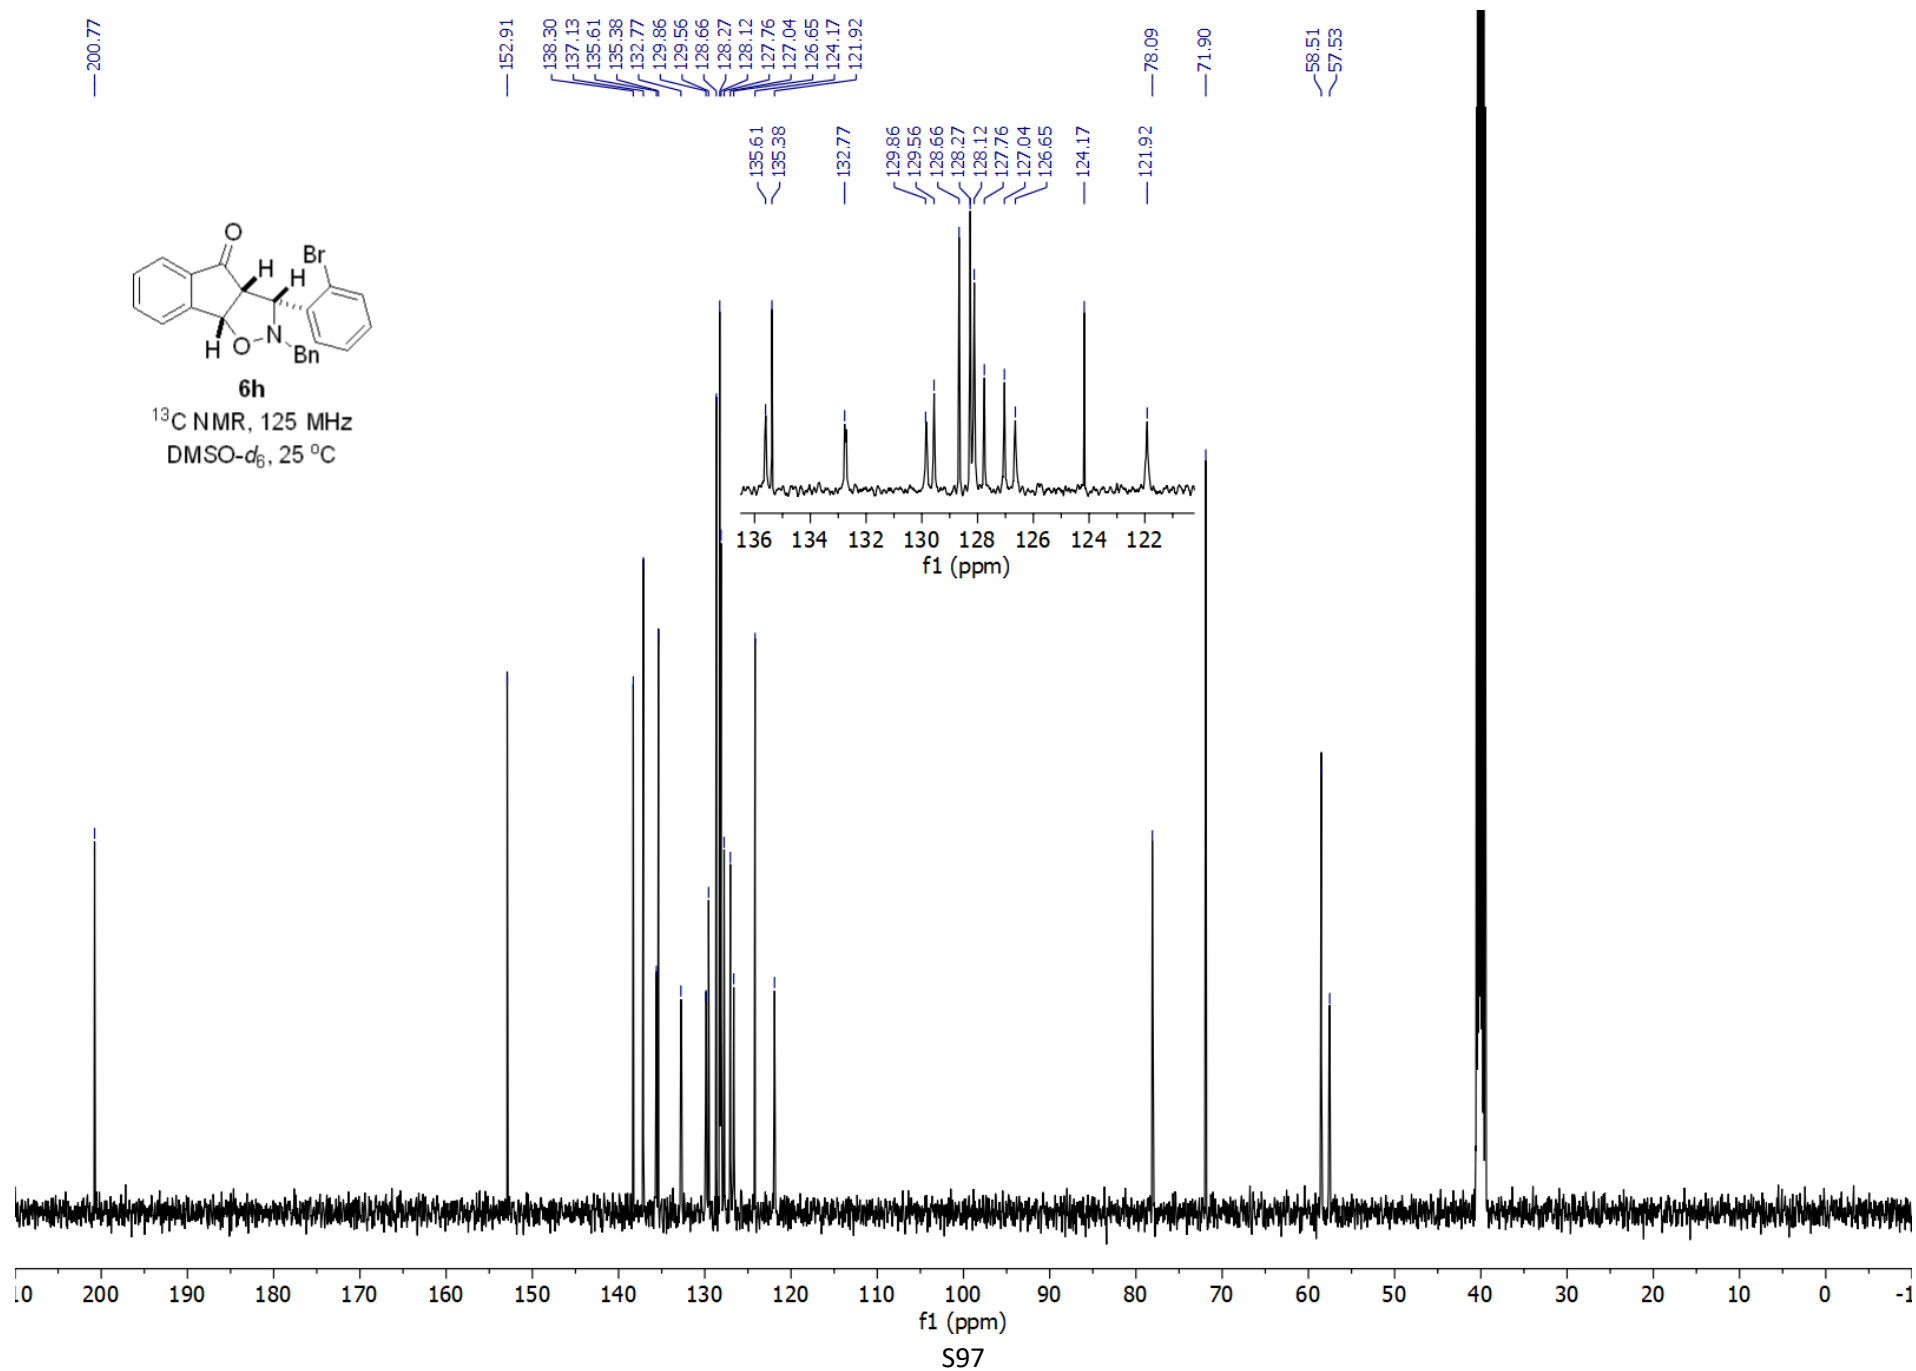

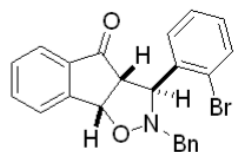

**7h**

$^1\text{H}$  NMR, 500 MHz  
DMSO- $d_6$ , 60  $^\circ\text{C}$

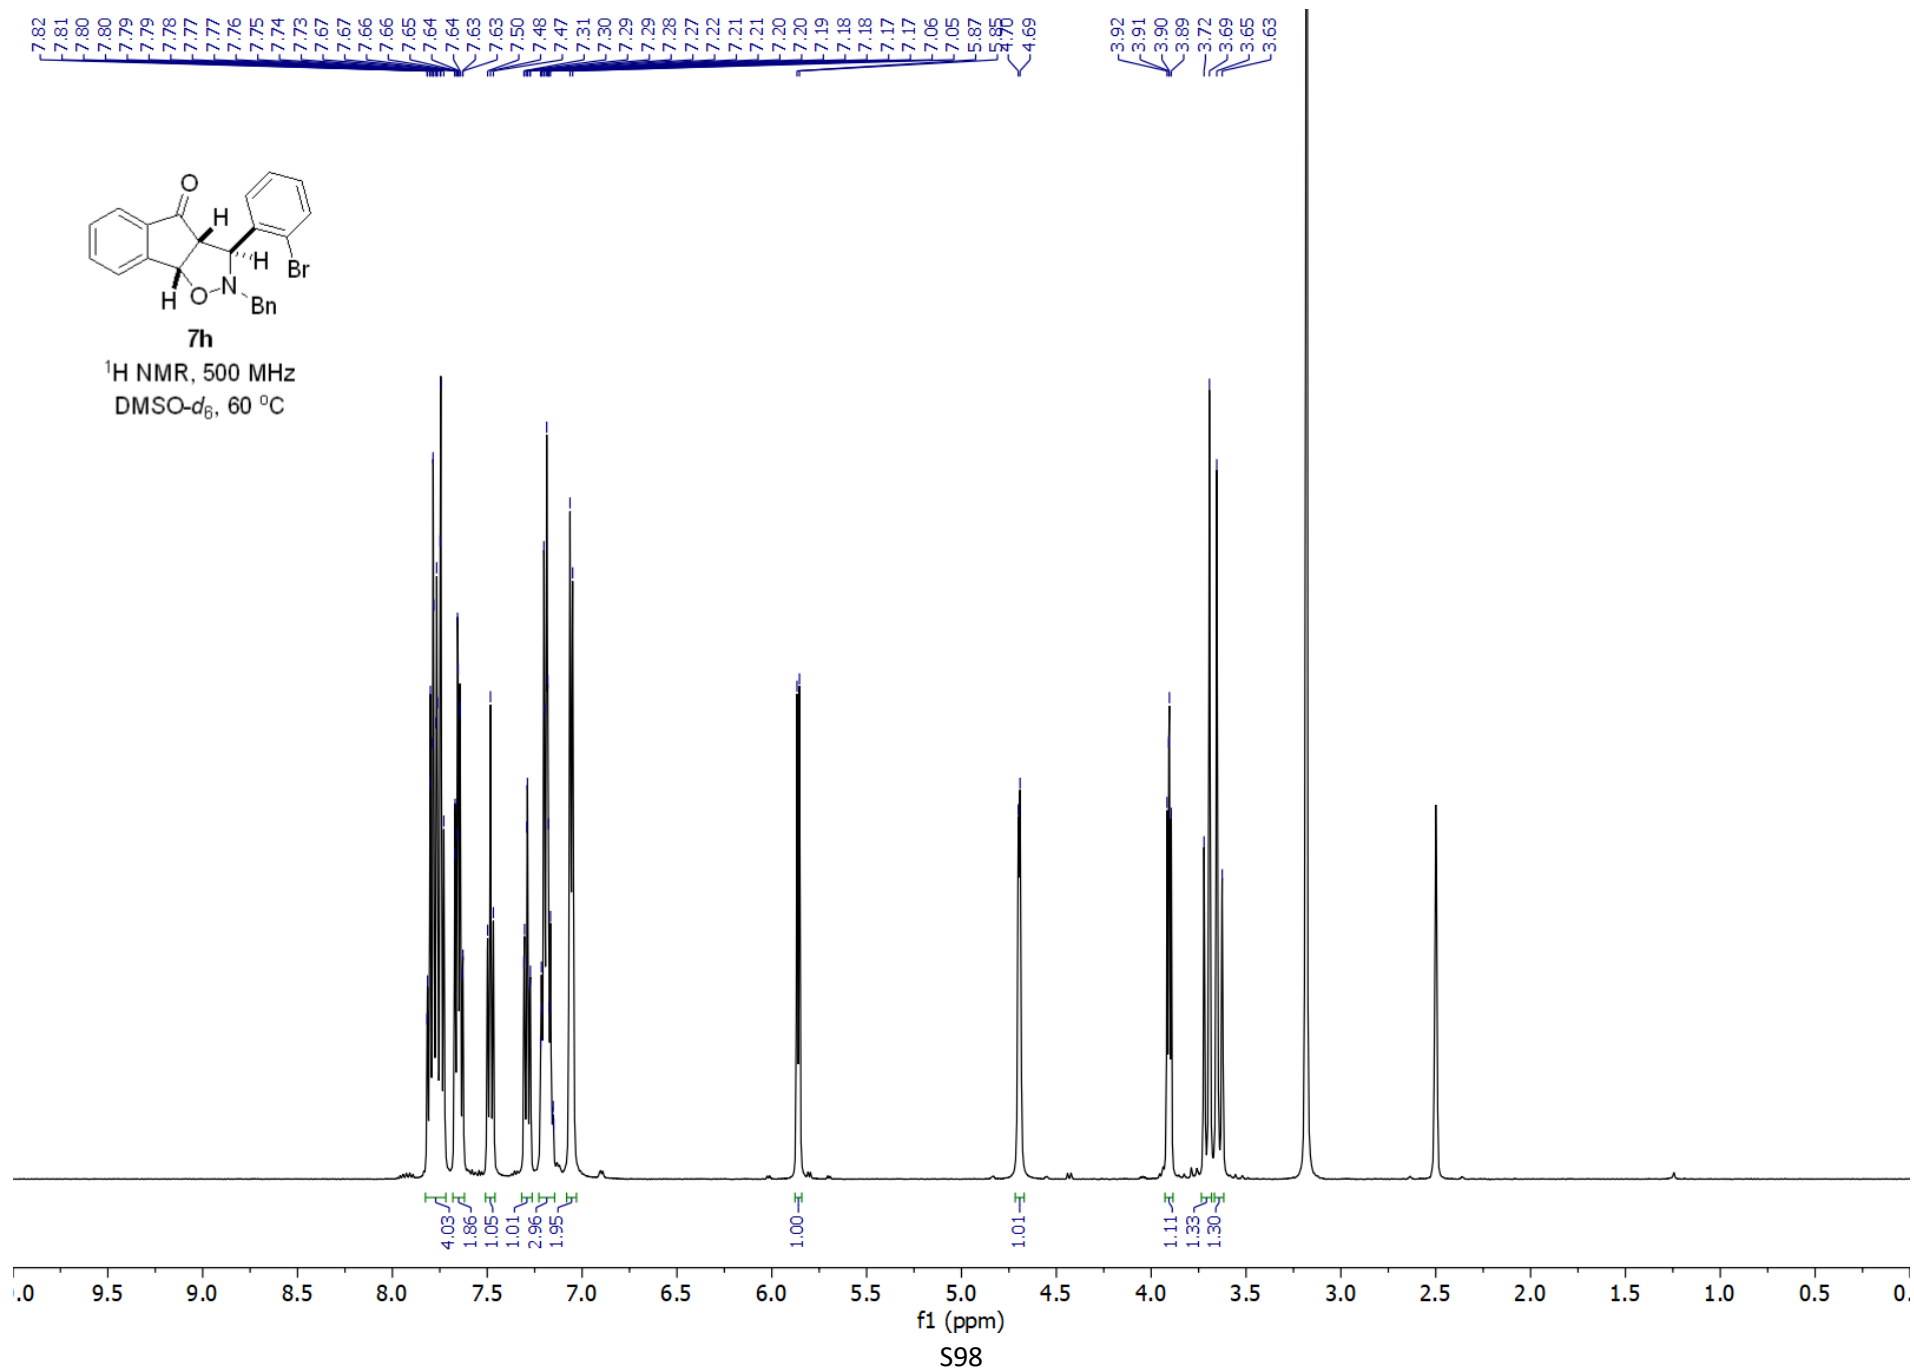

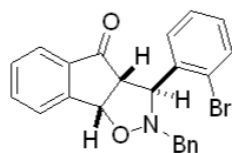

**7h**

$^{13}\text{C}$  NMR, 125 MHz  
DMSO- $d_6$ , 60  $^{\circ}\text{C}$

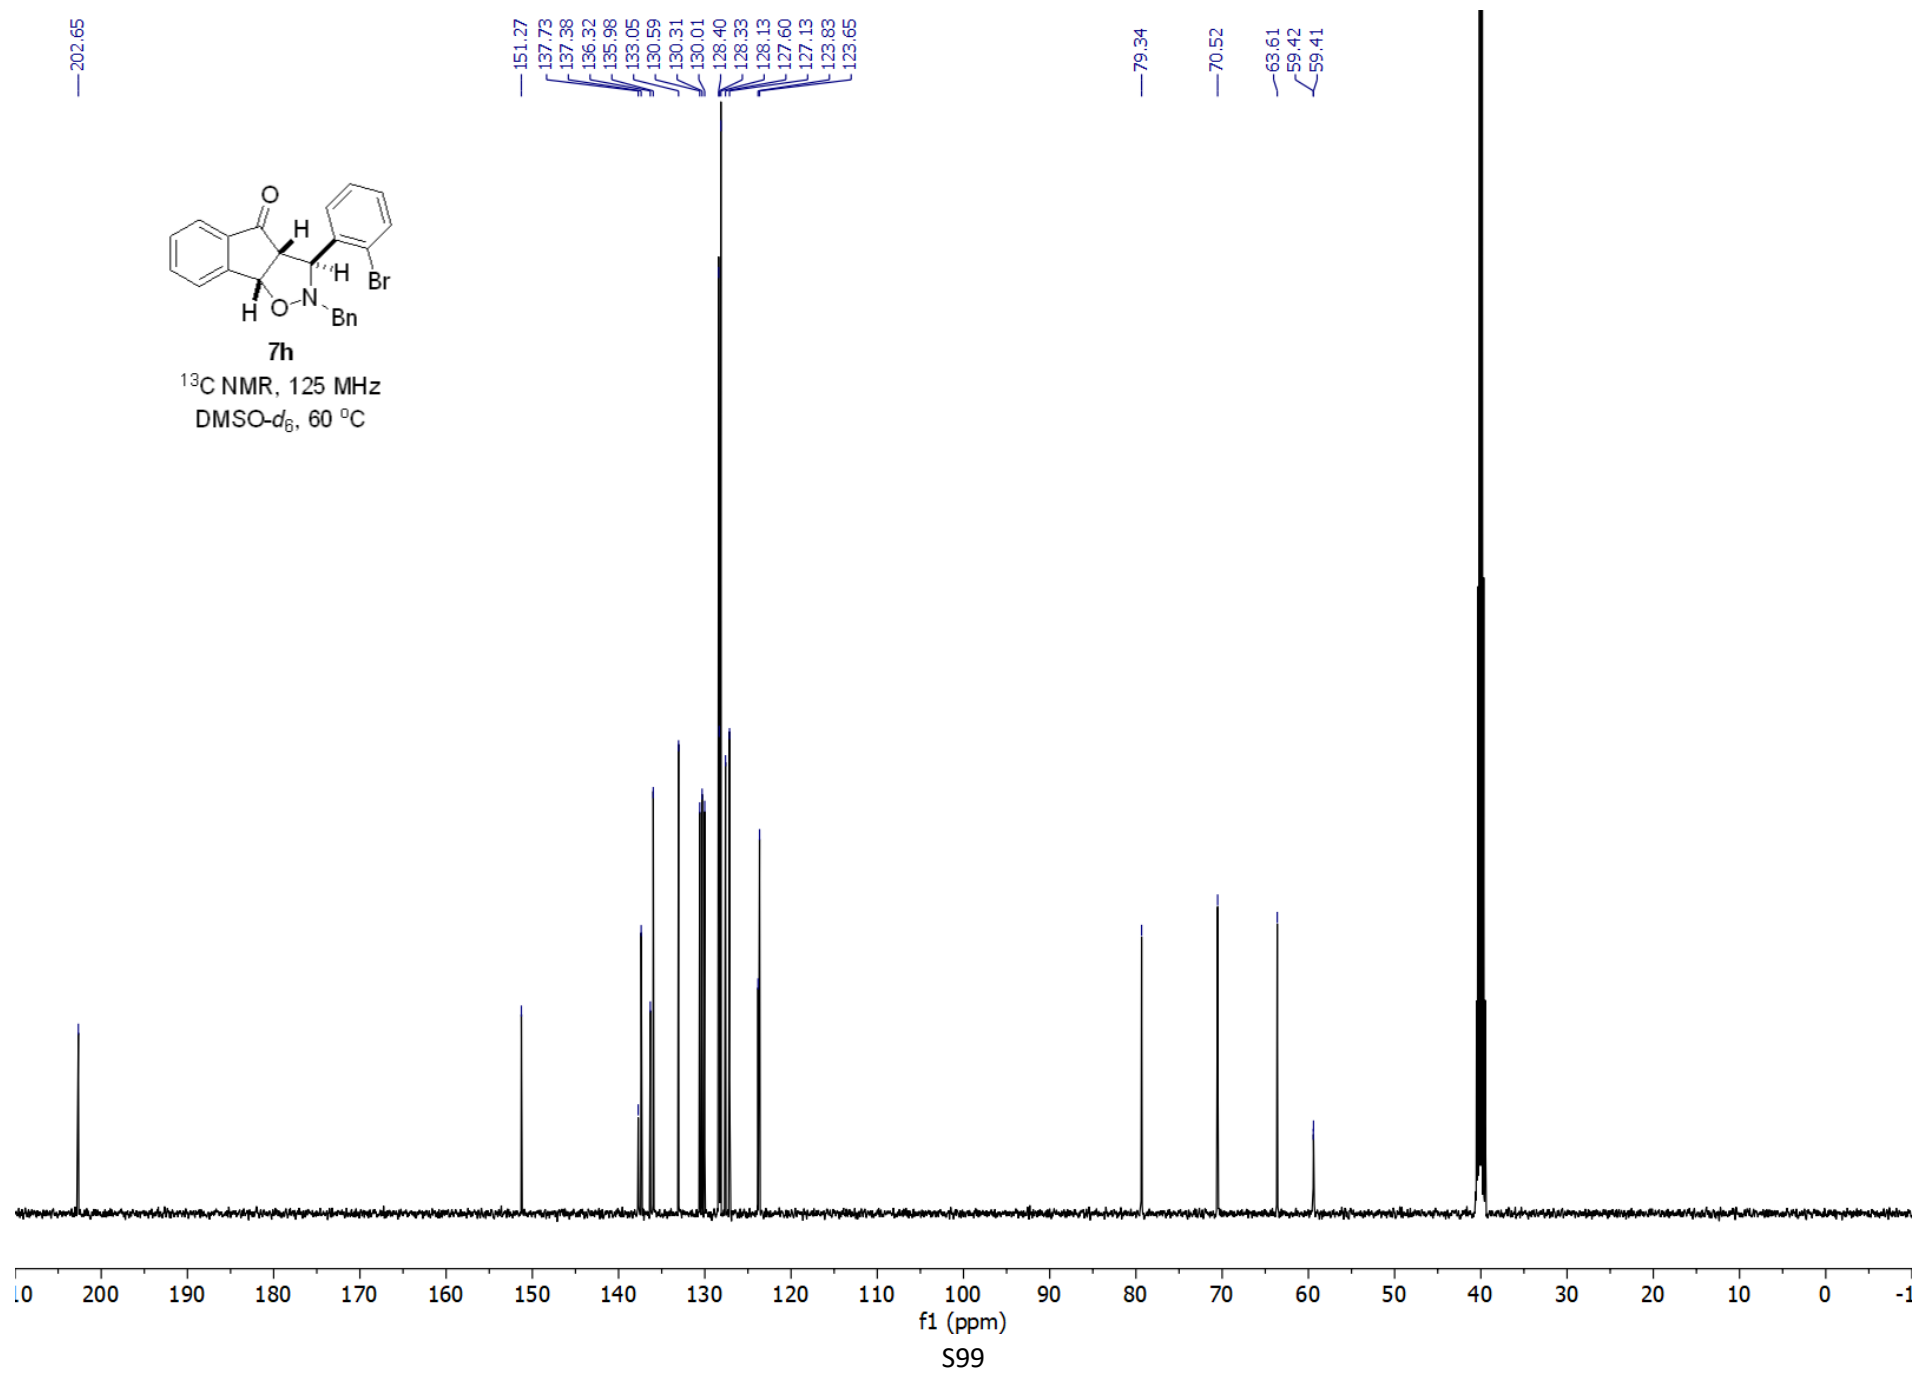

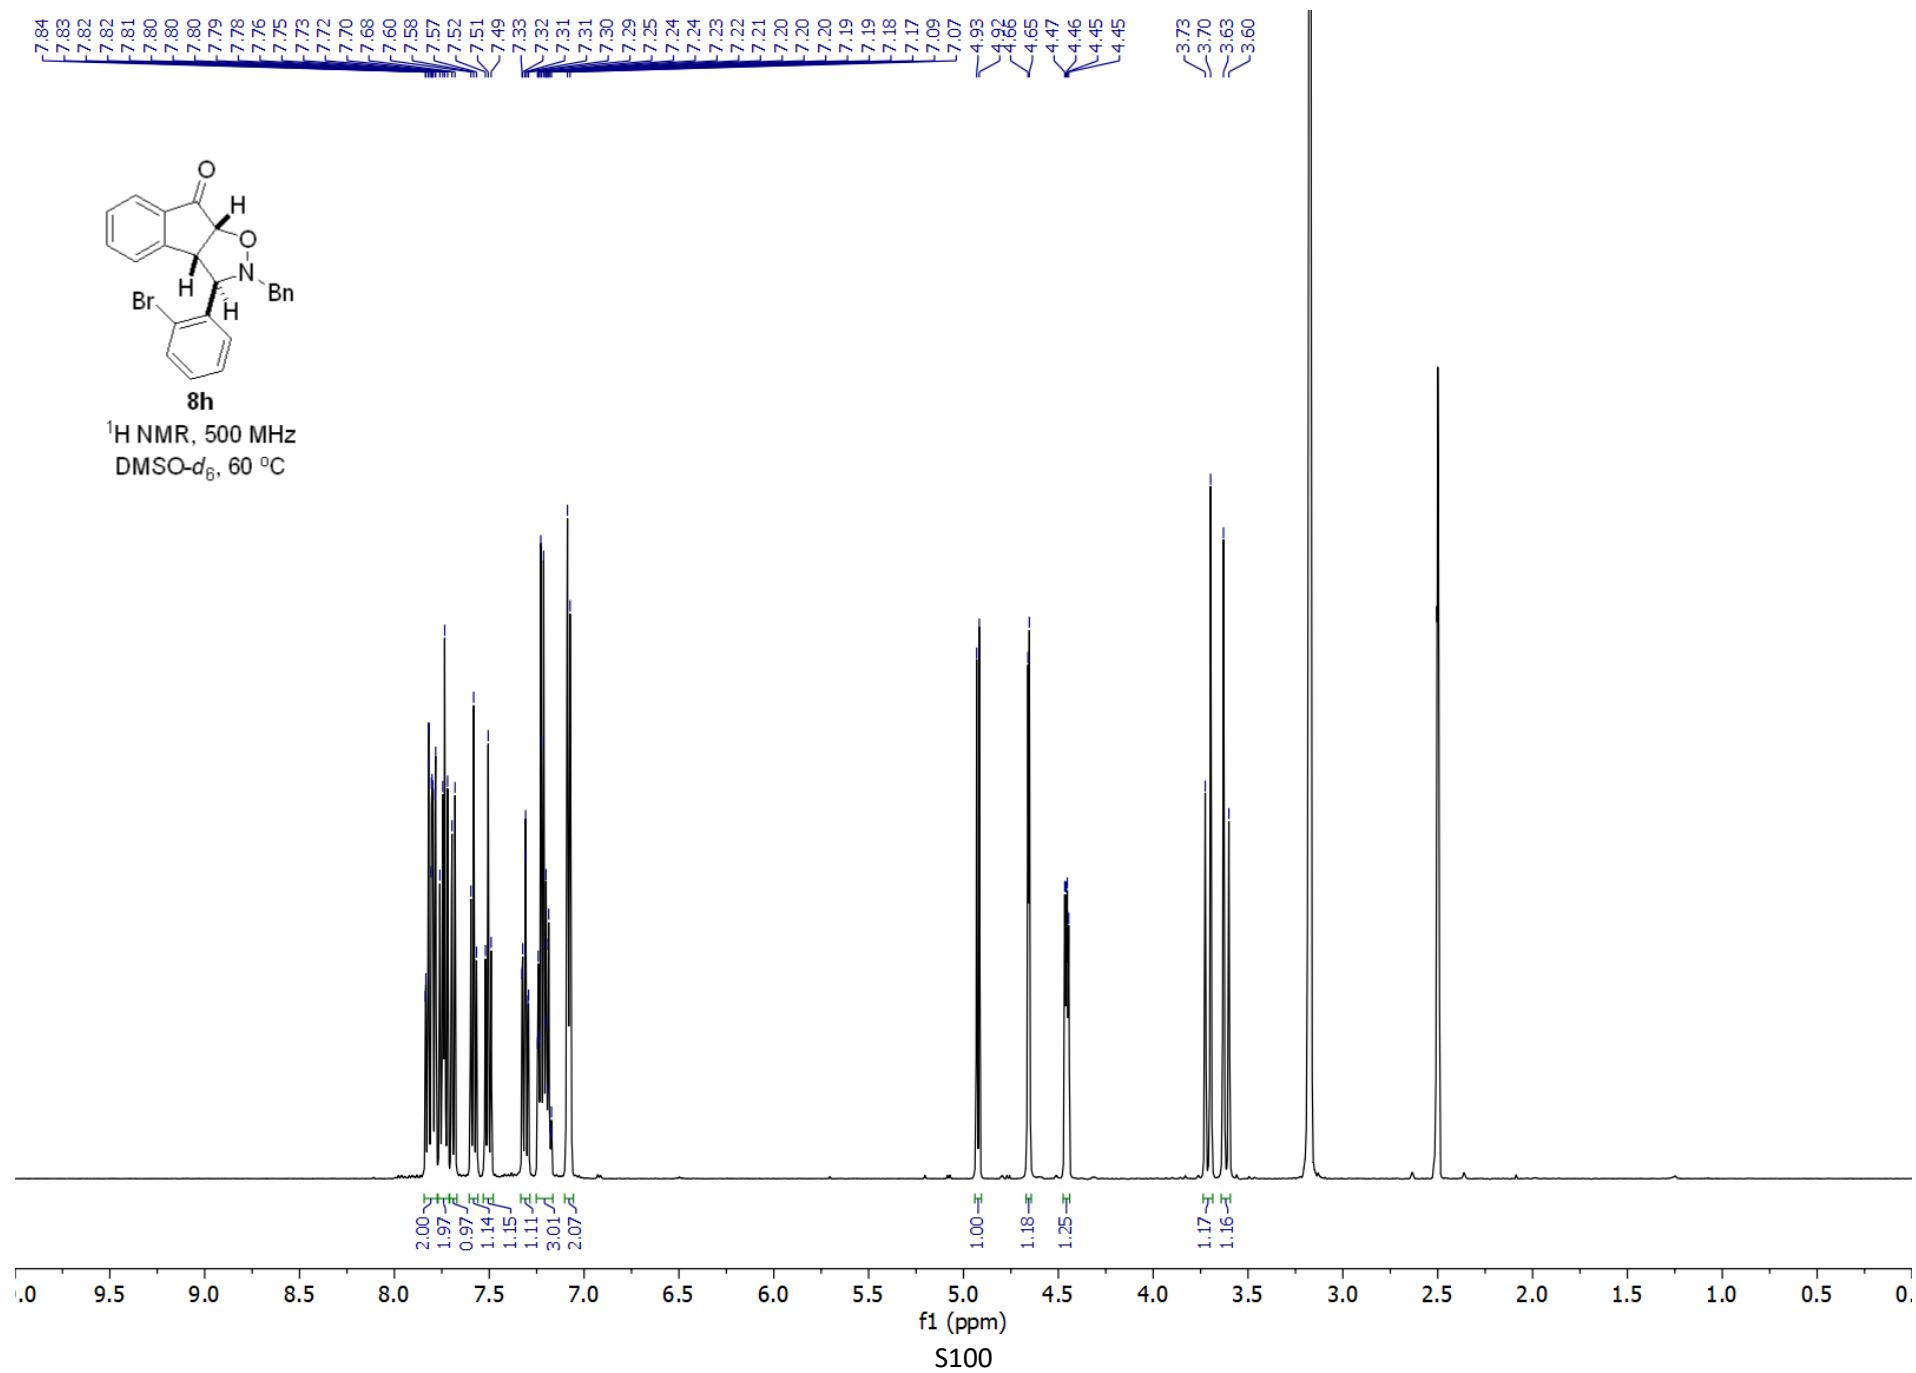

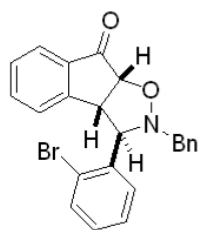

**8h**

$^{13}\text{C}$  NMR, 125 MHz  
DMSO- $d_6$ , 60 °C

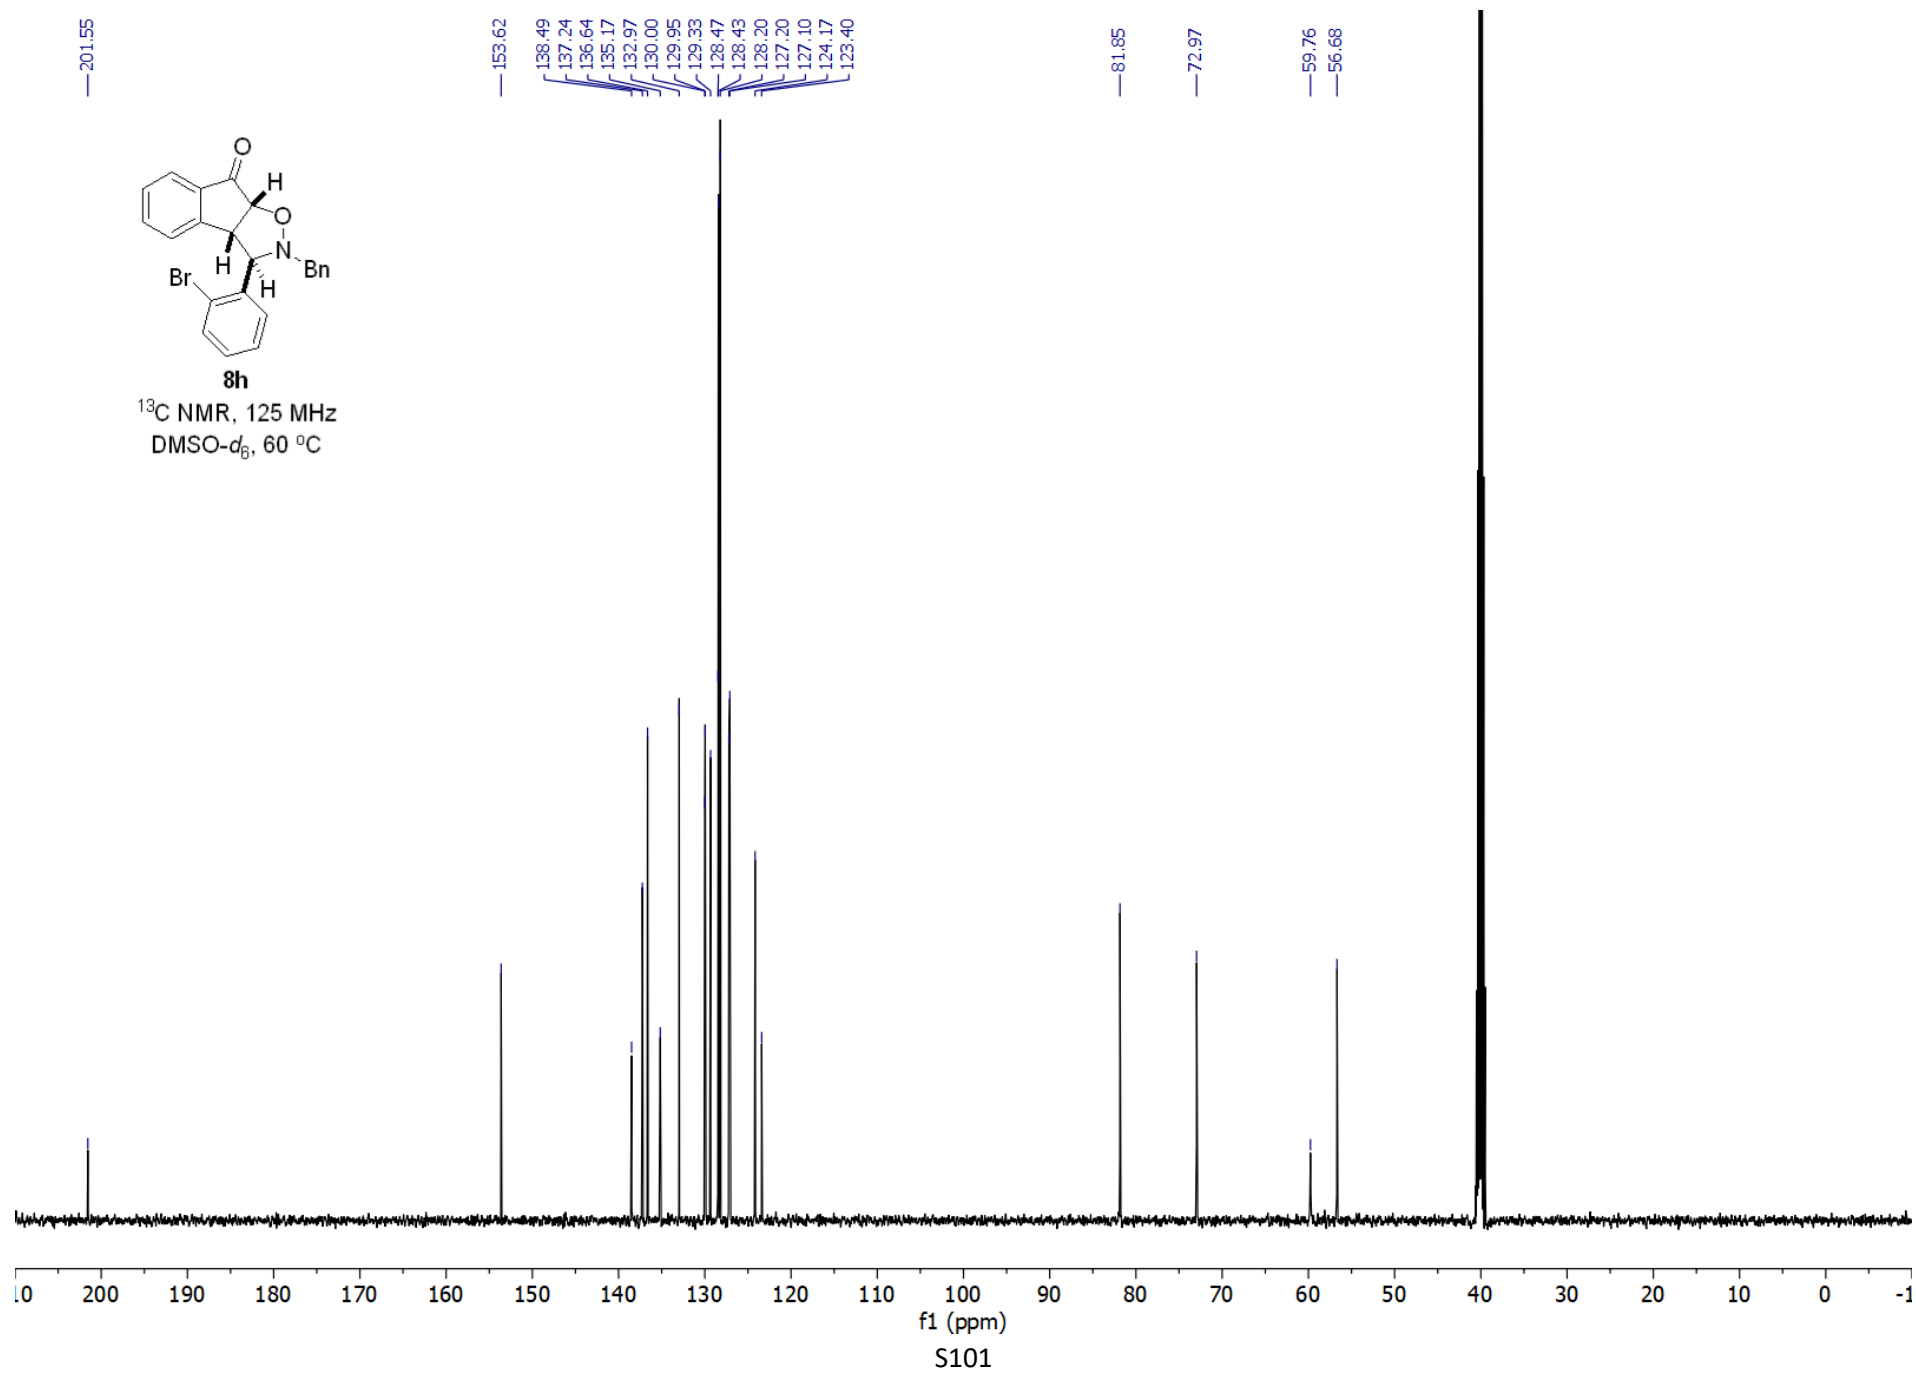

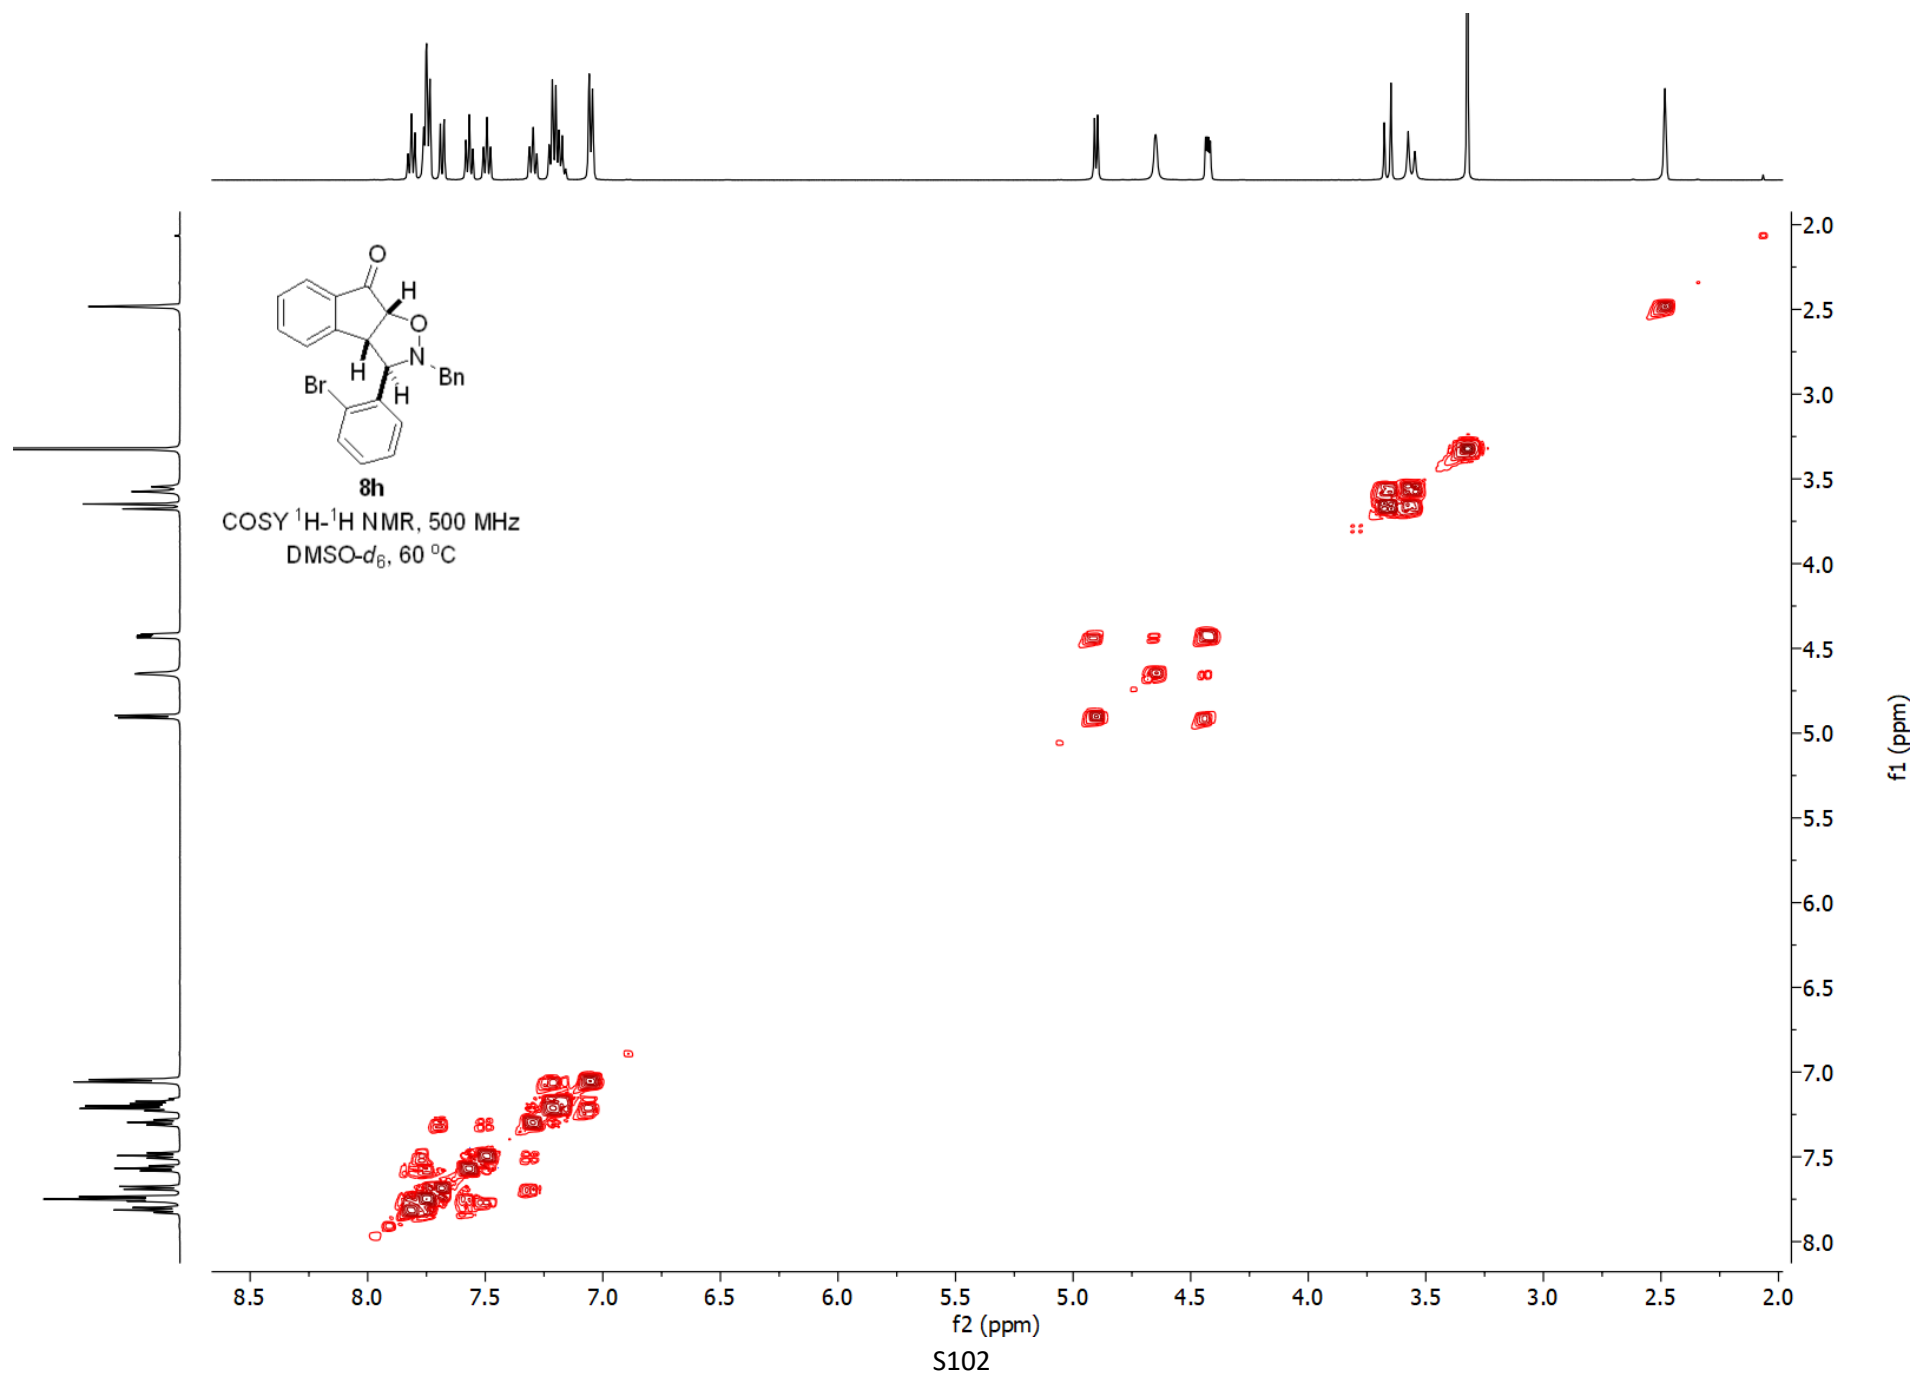

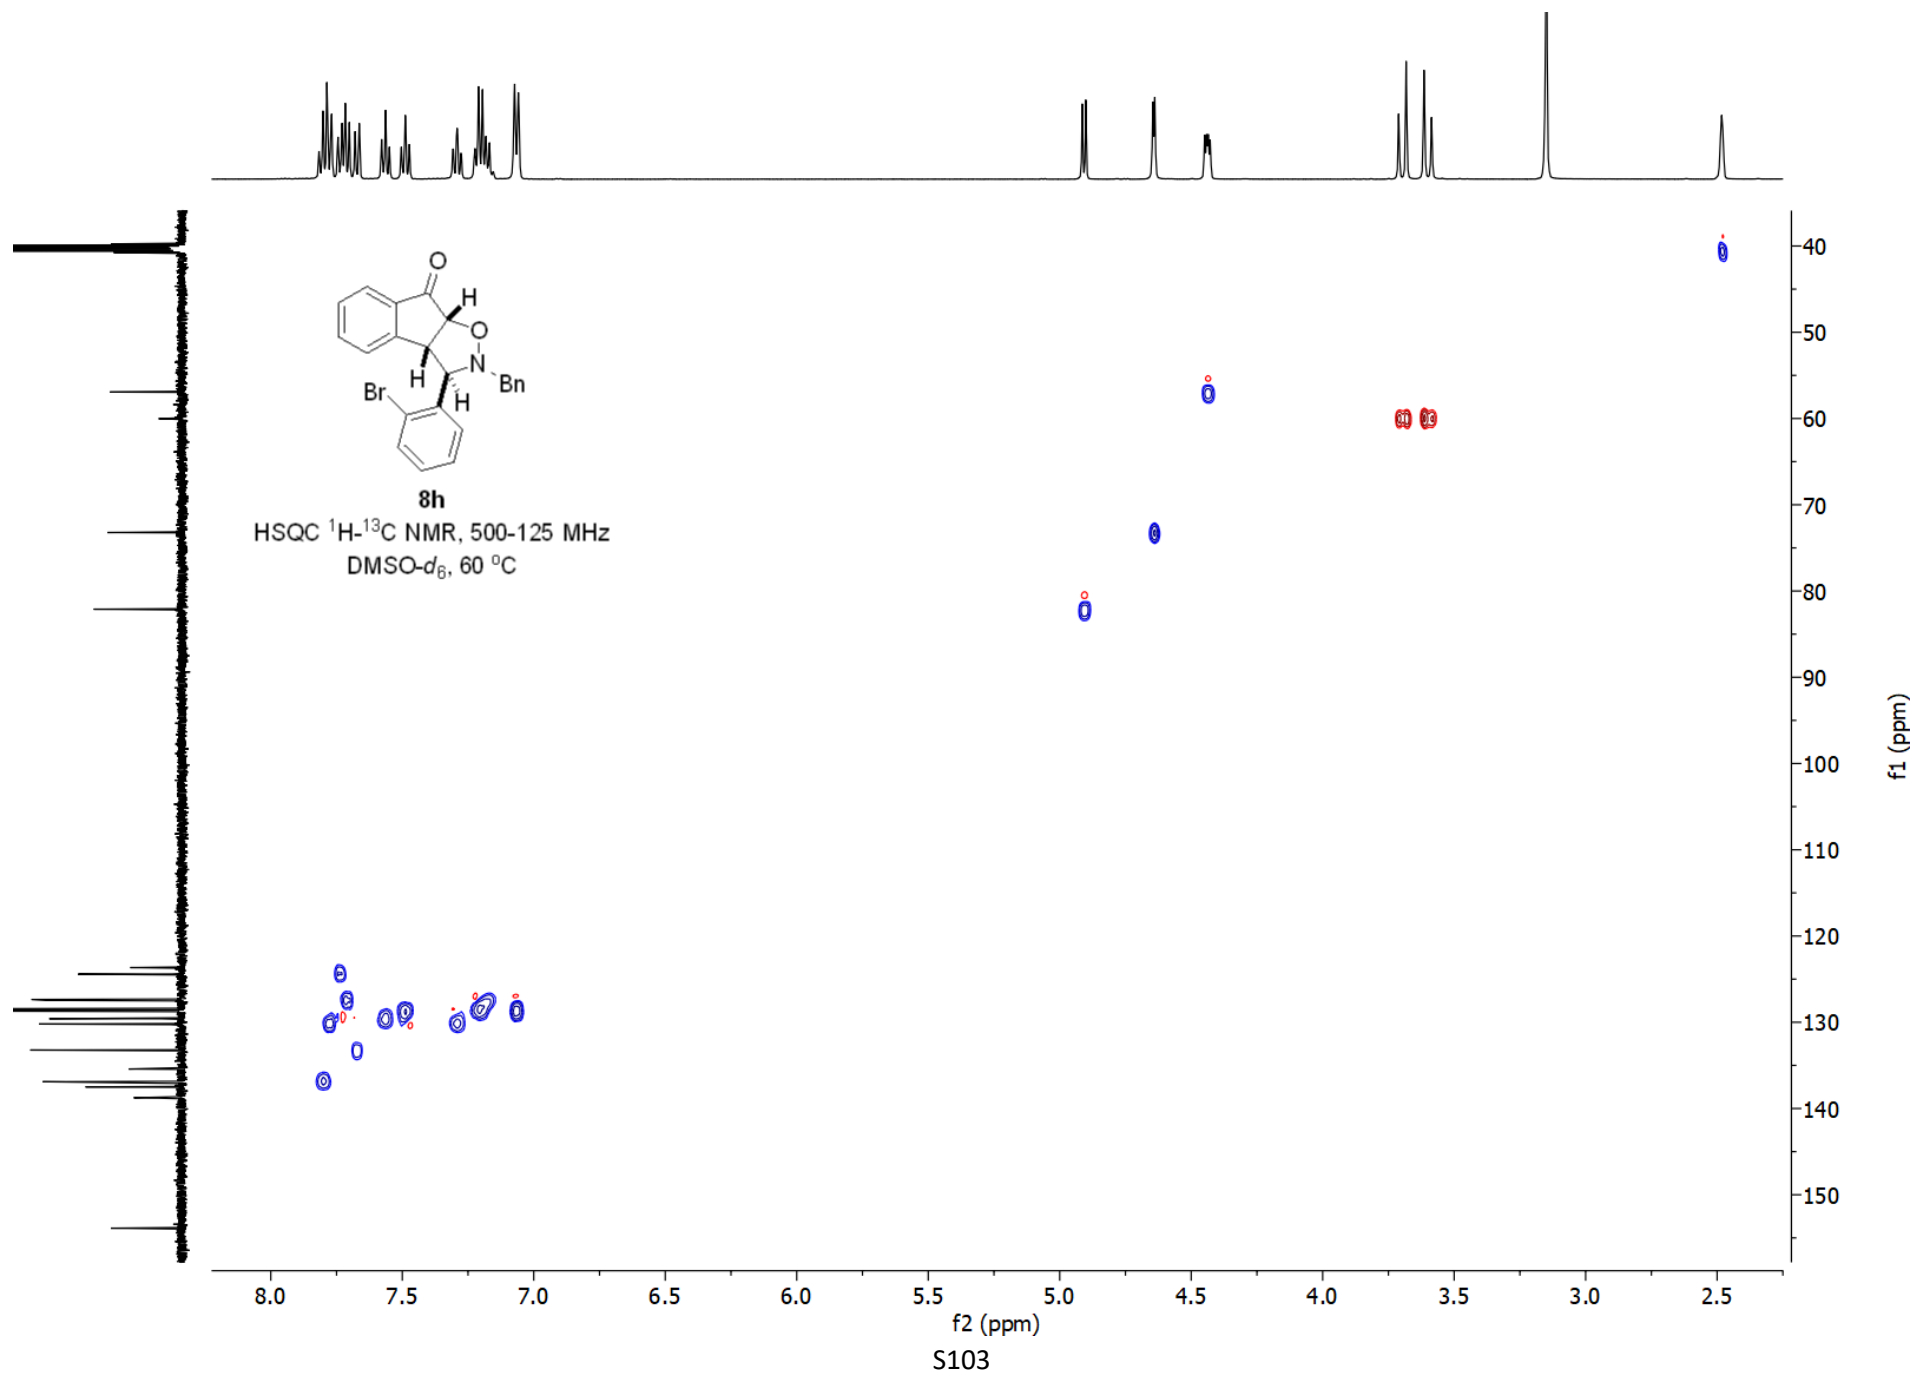

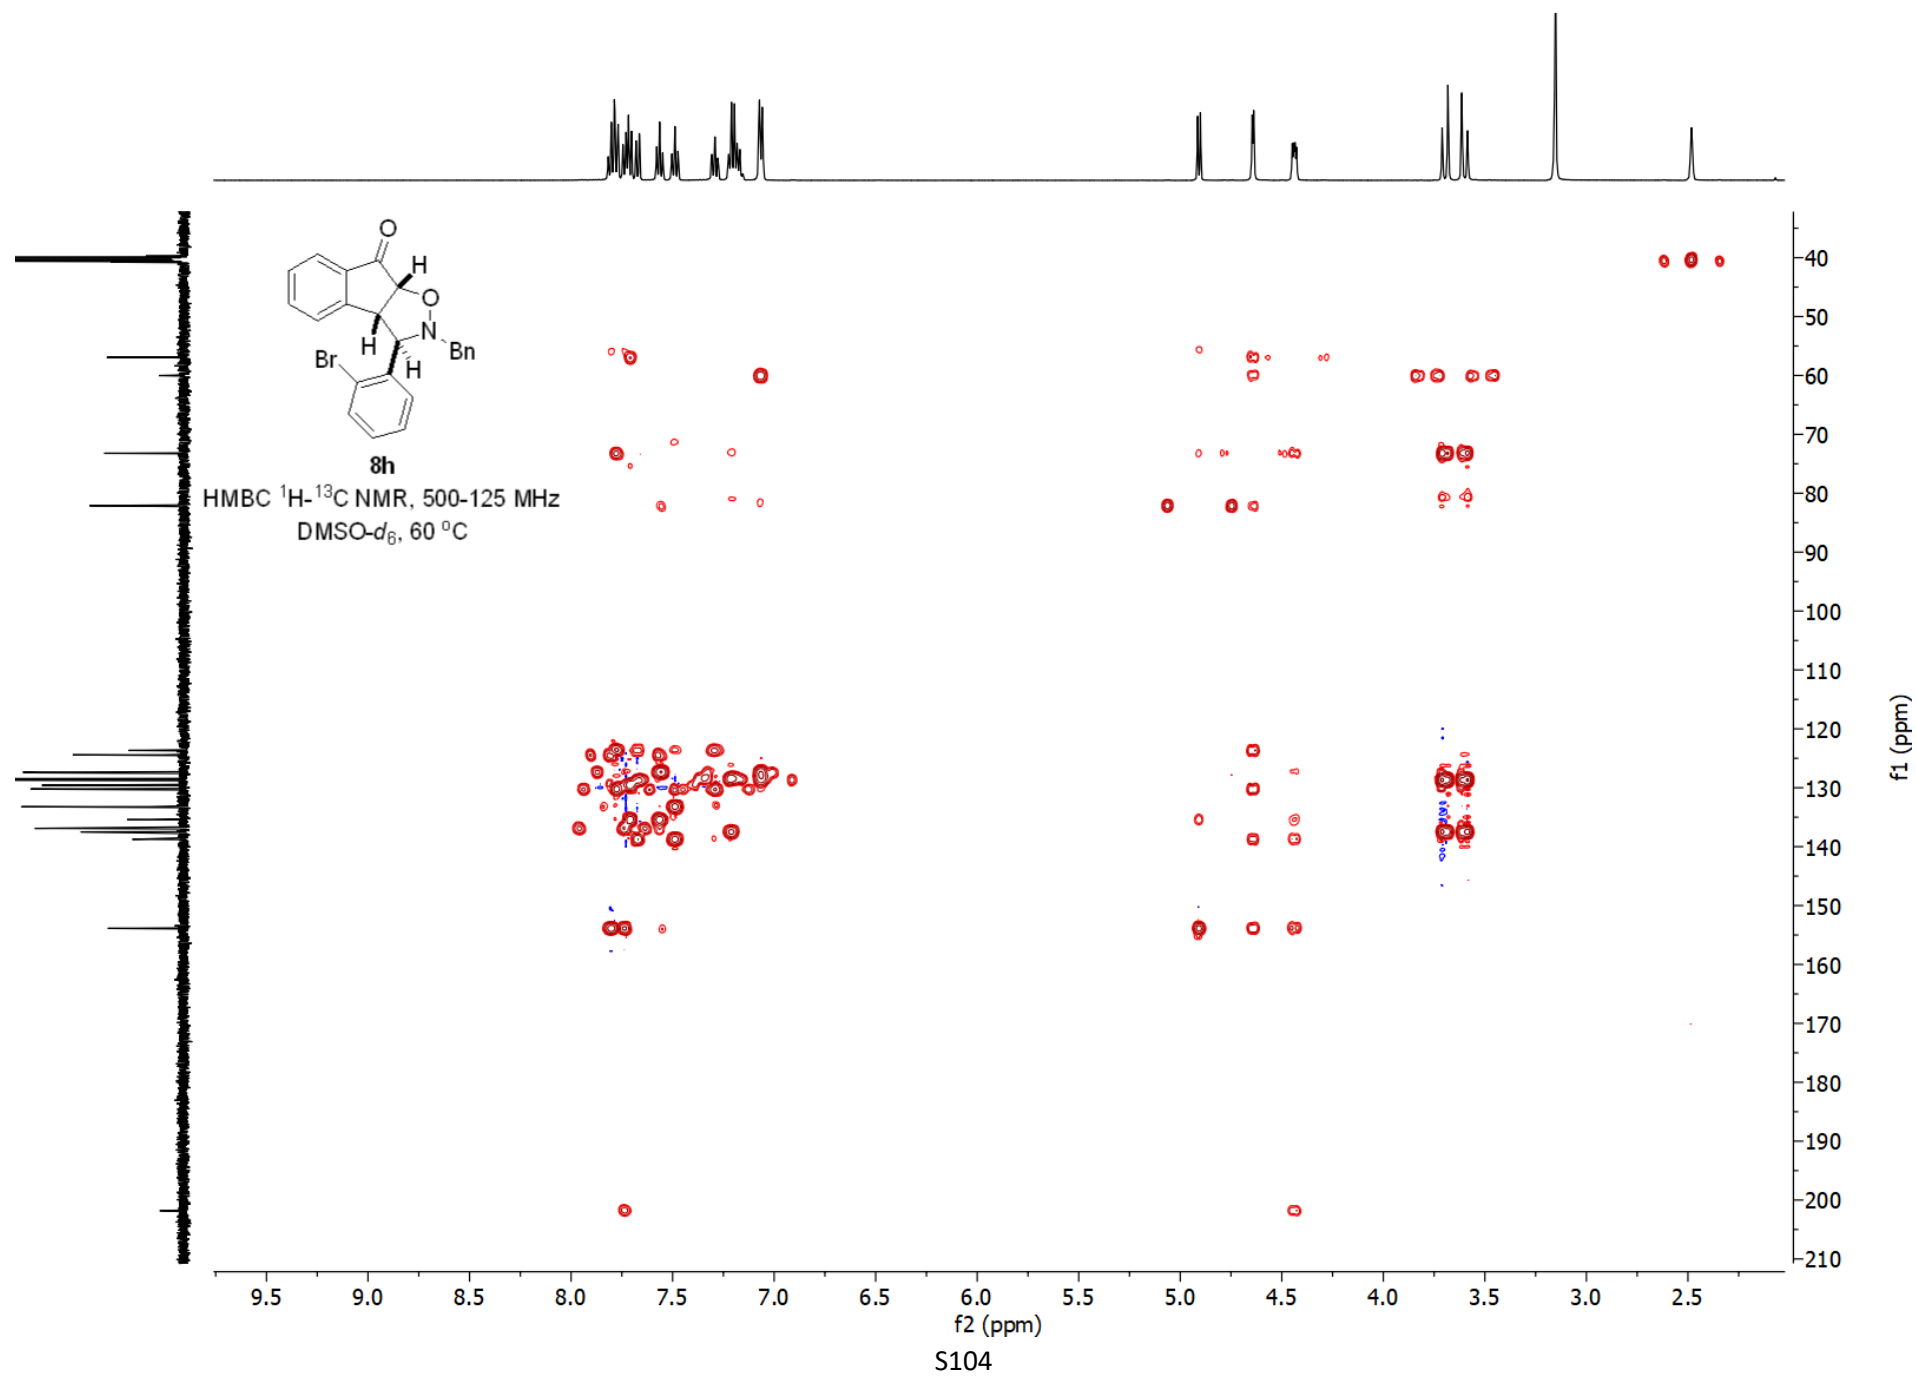

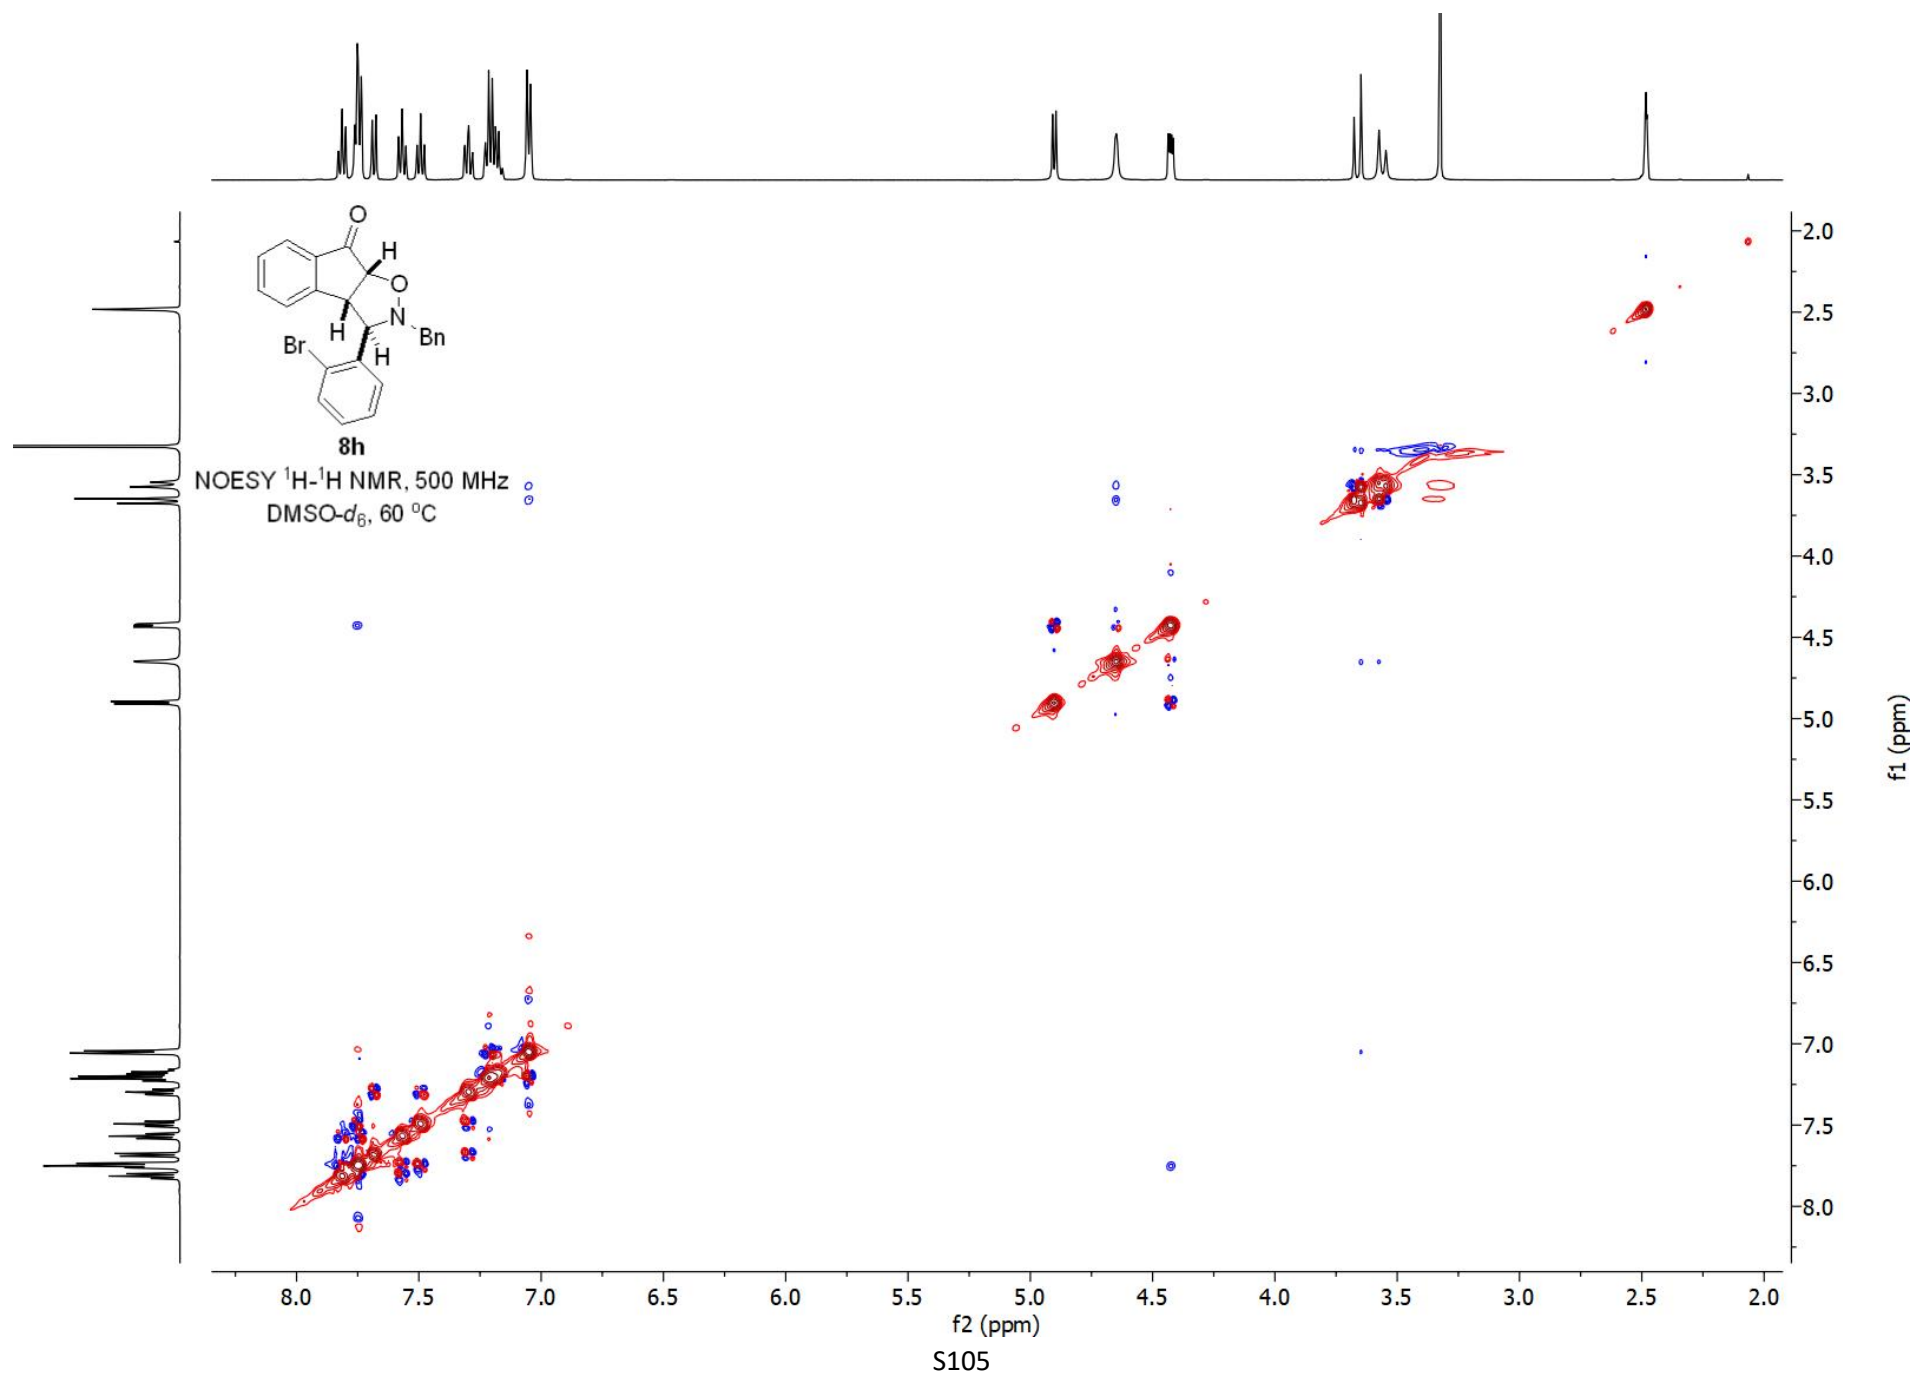

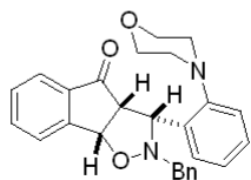

**6i**

$^1\text{H}$  NMR, 500 MHz  
DMSO- $d_6$ , 25 °C

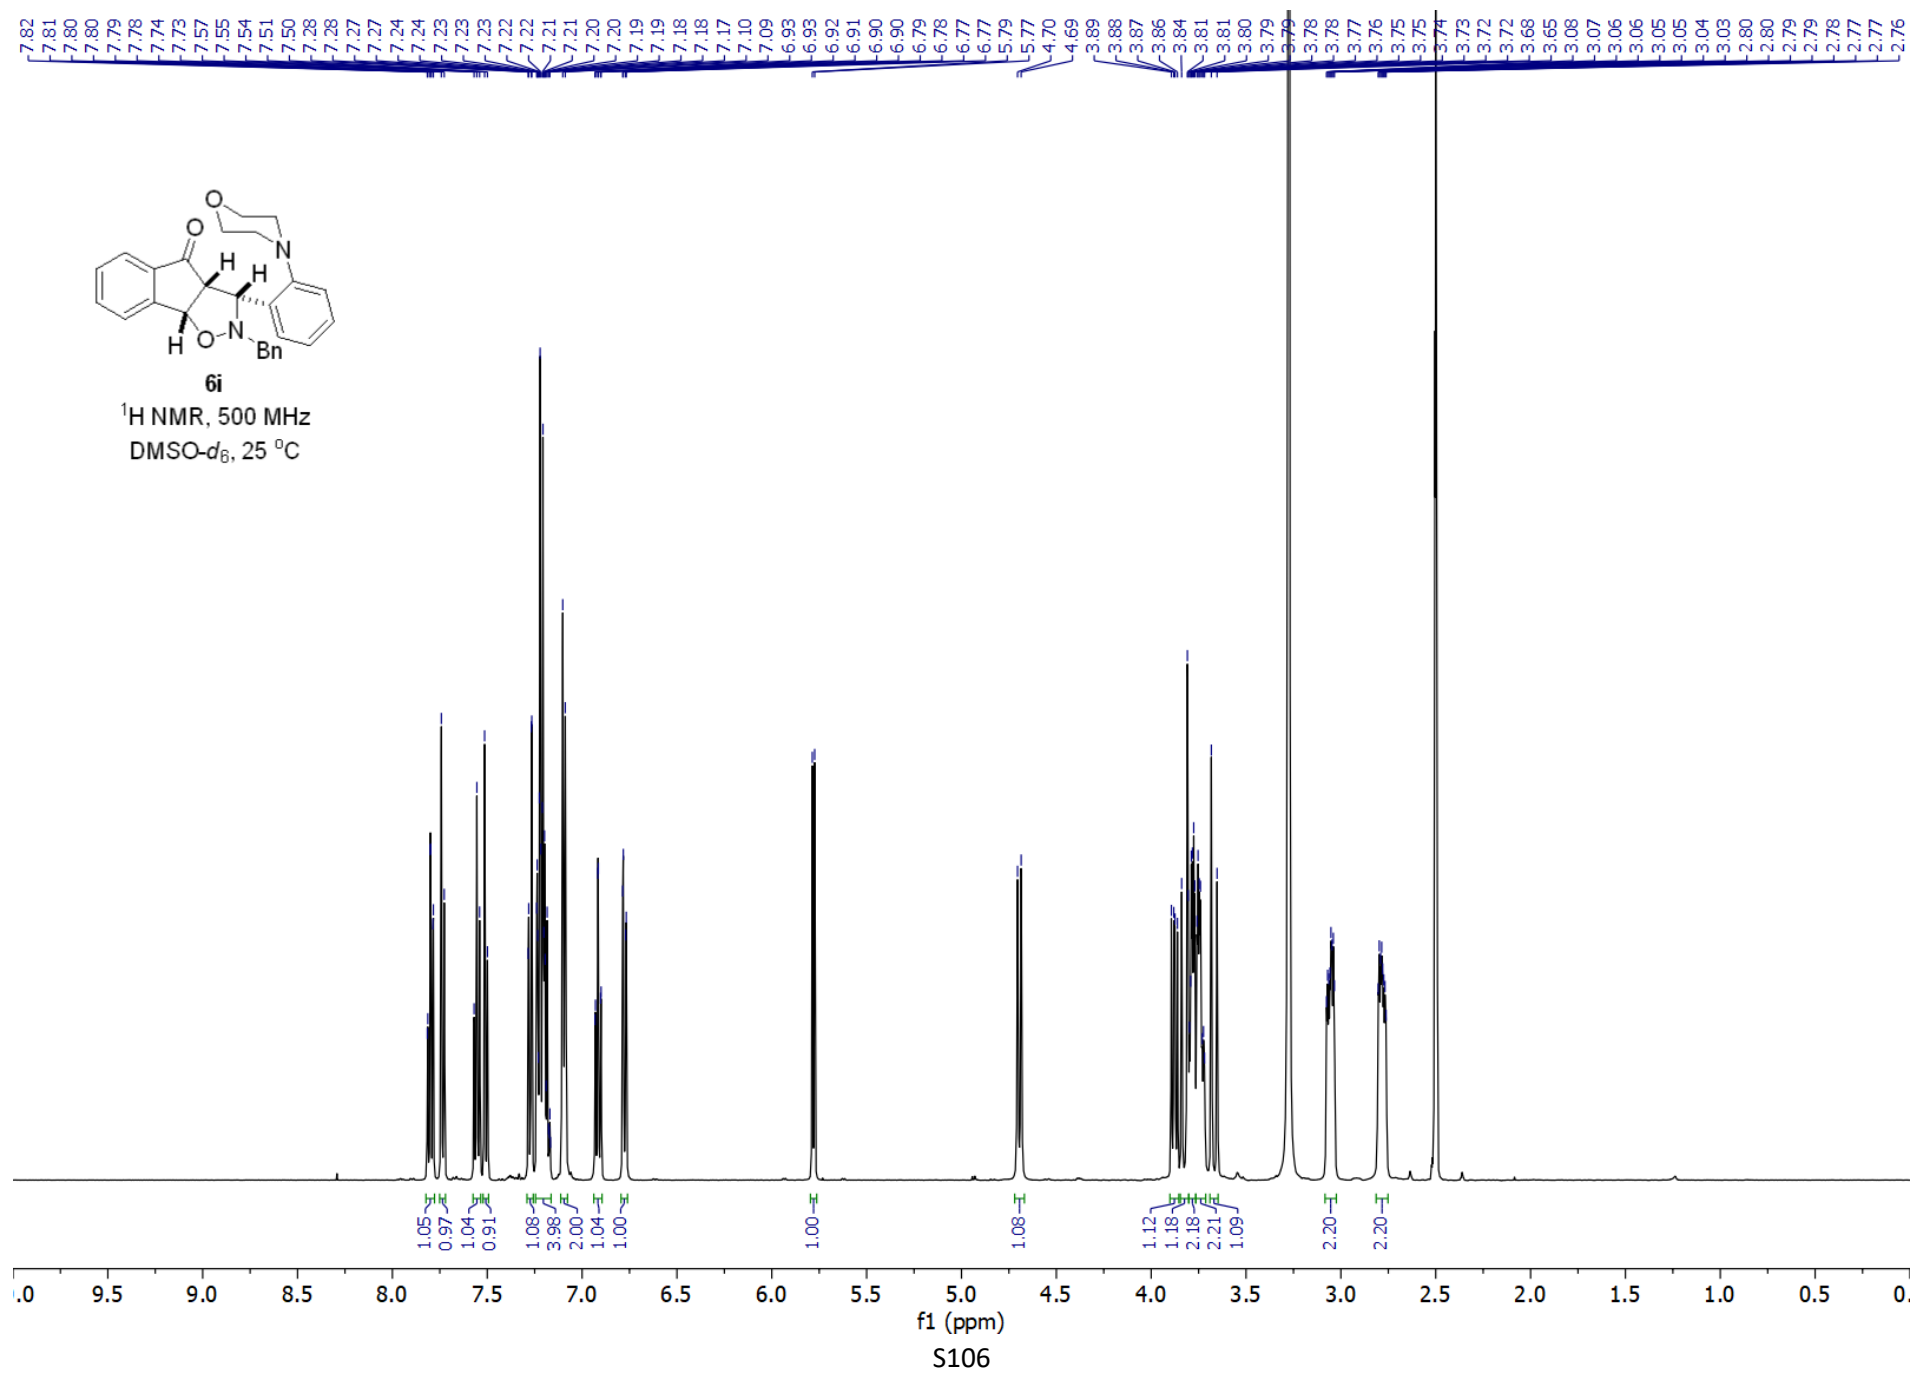

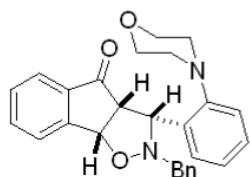

**6i**

$^{13}\text{C}$  NMR, 125 MHz  
DMSO- $d_6$ , 25  $^{\circ}\text{C}$

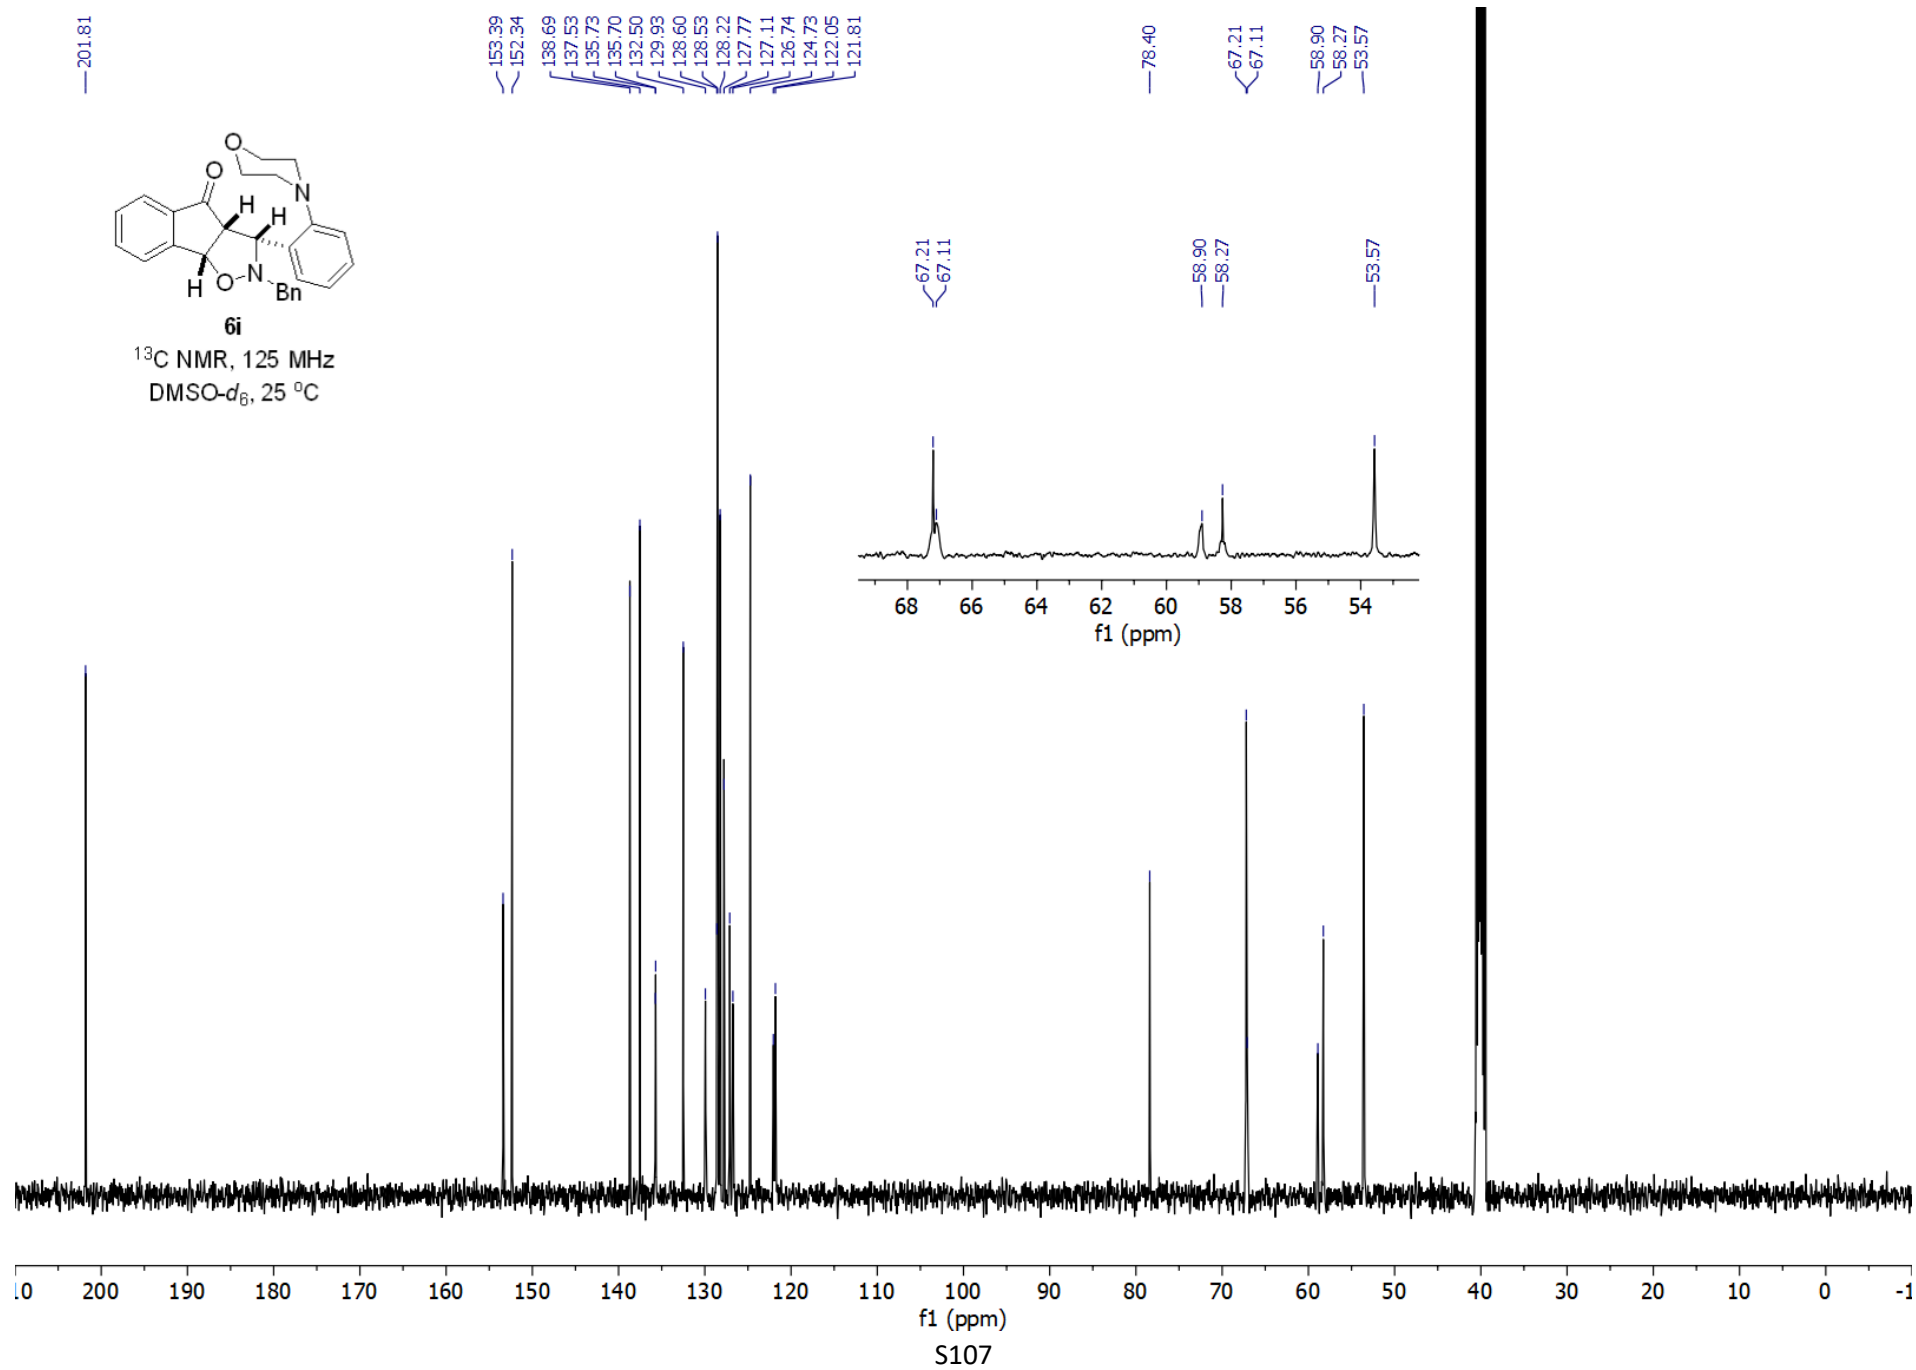

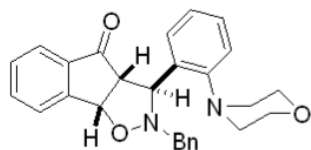

**7i**

$^1\text{H}$  NMR, 500 MHz  
DMSO- $d_6$ , 60  $^\circ\text{C}$

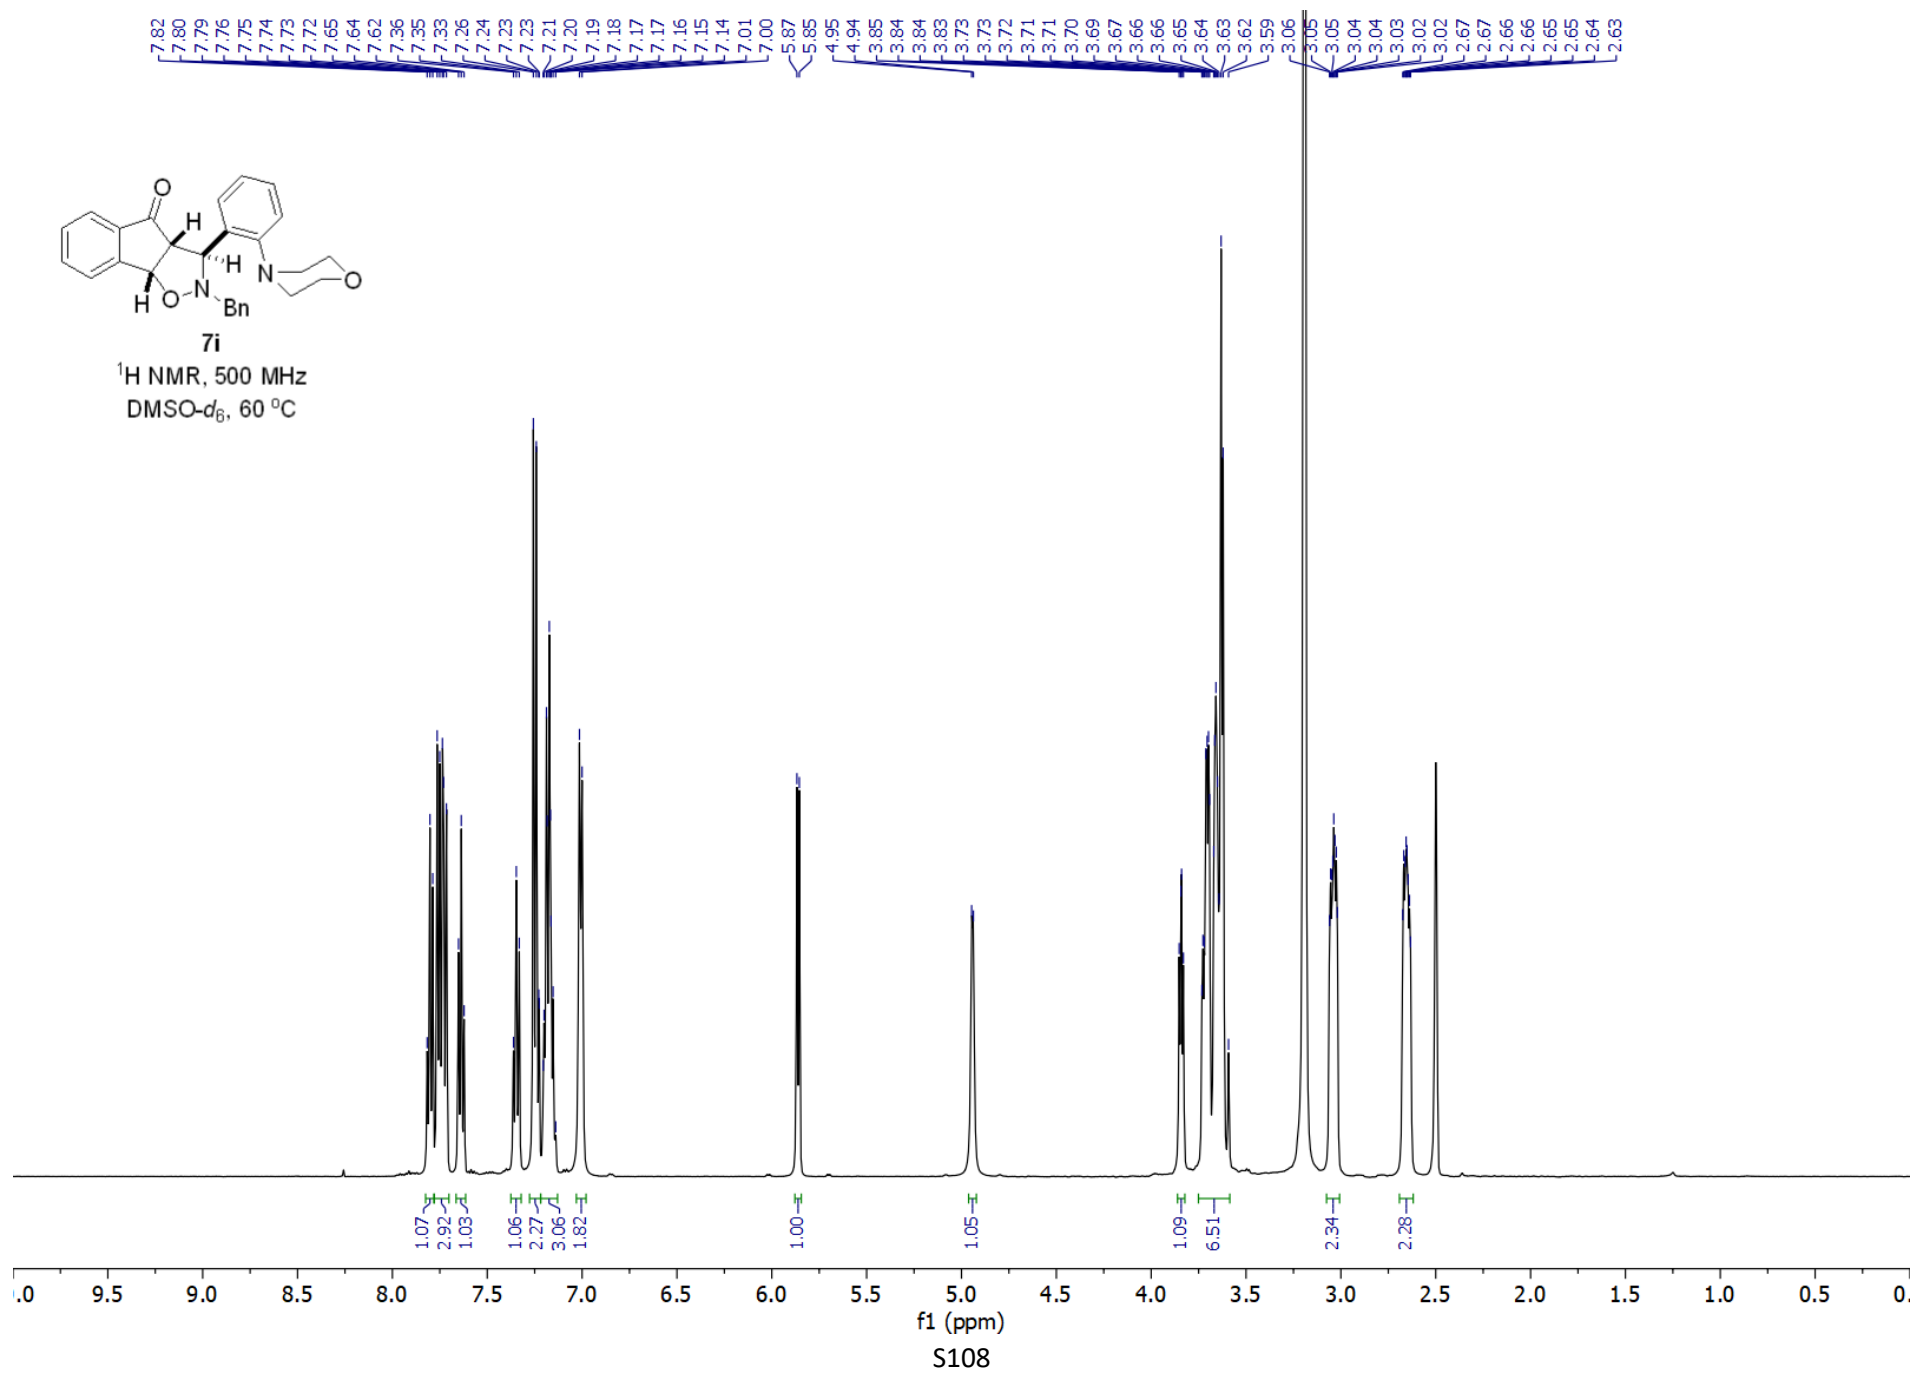

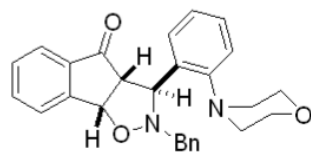

**7i**

$^{13}\text{C}$  NMR, 125 MHz

$\text{DMSO-}d_6$ , 60  $^{\circ}\text{C}$

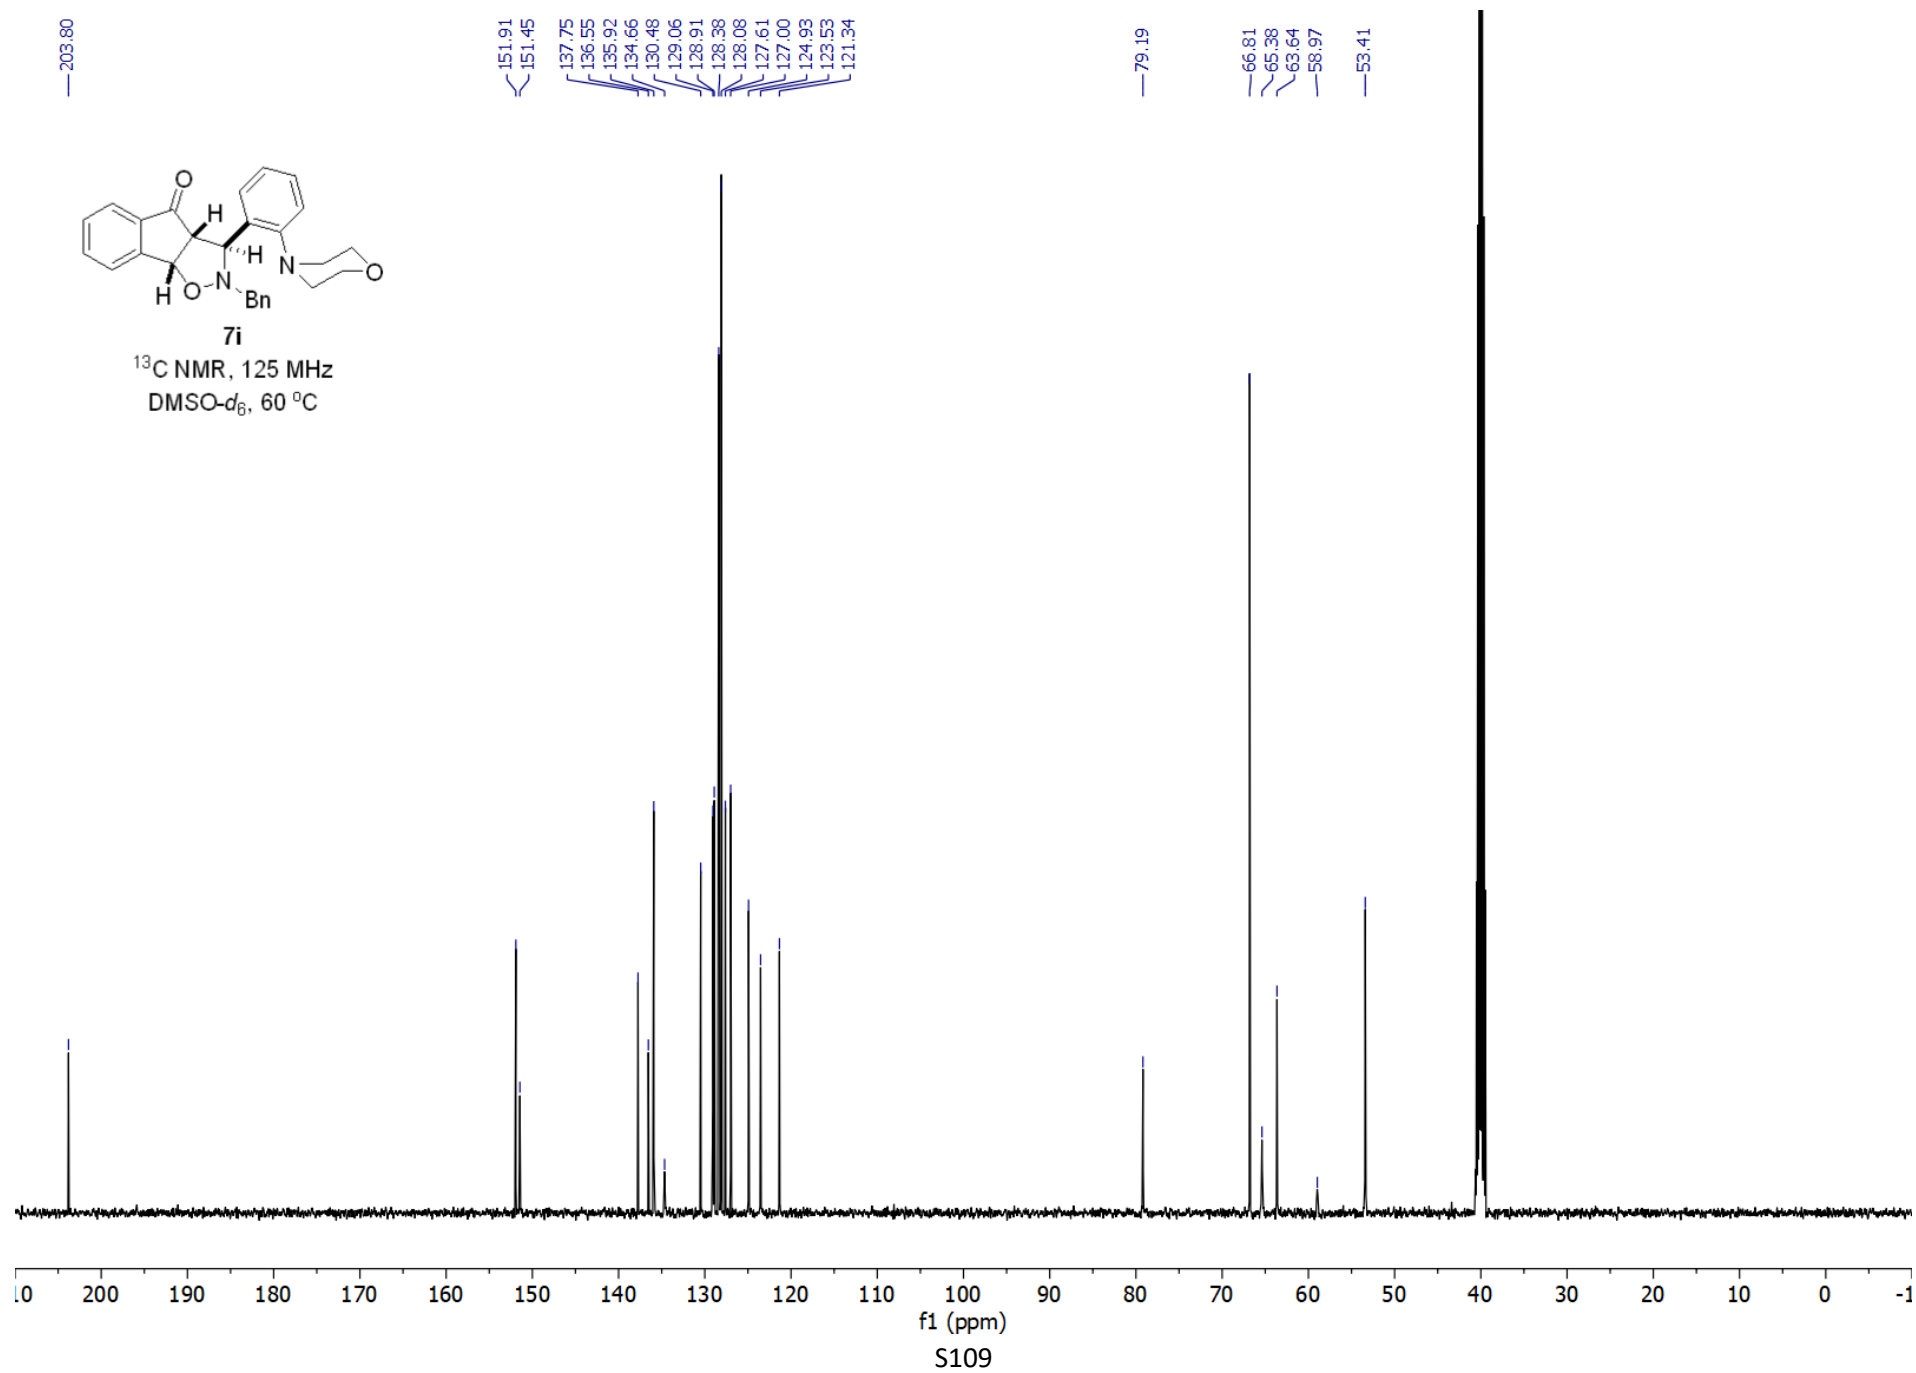

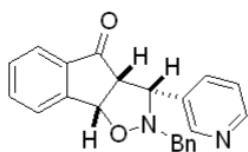

**6j**

$^1\text{H}$  NMR, 500 MHz  
DMSO- $d_6$ , 25  $^\circ\text{C}$

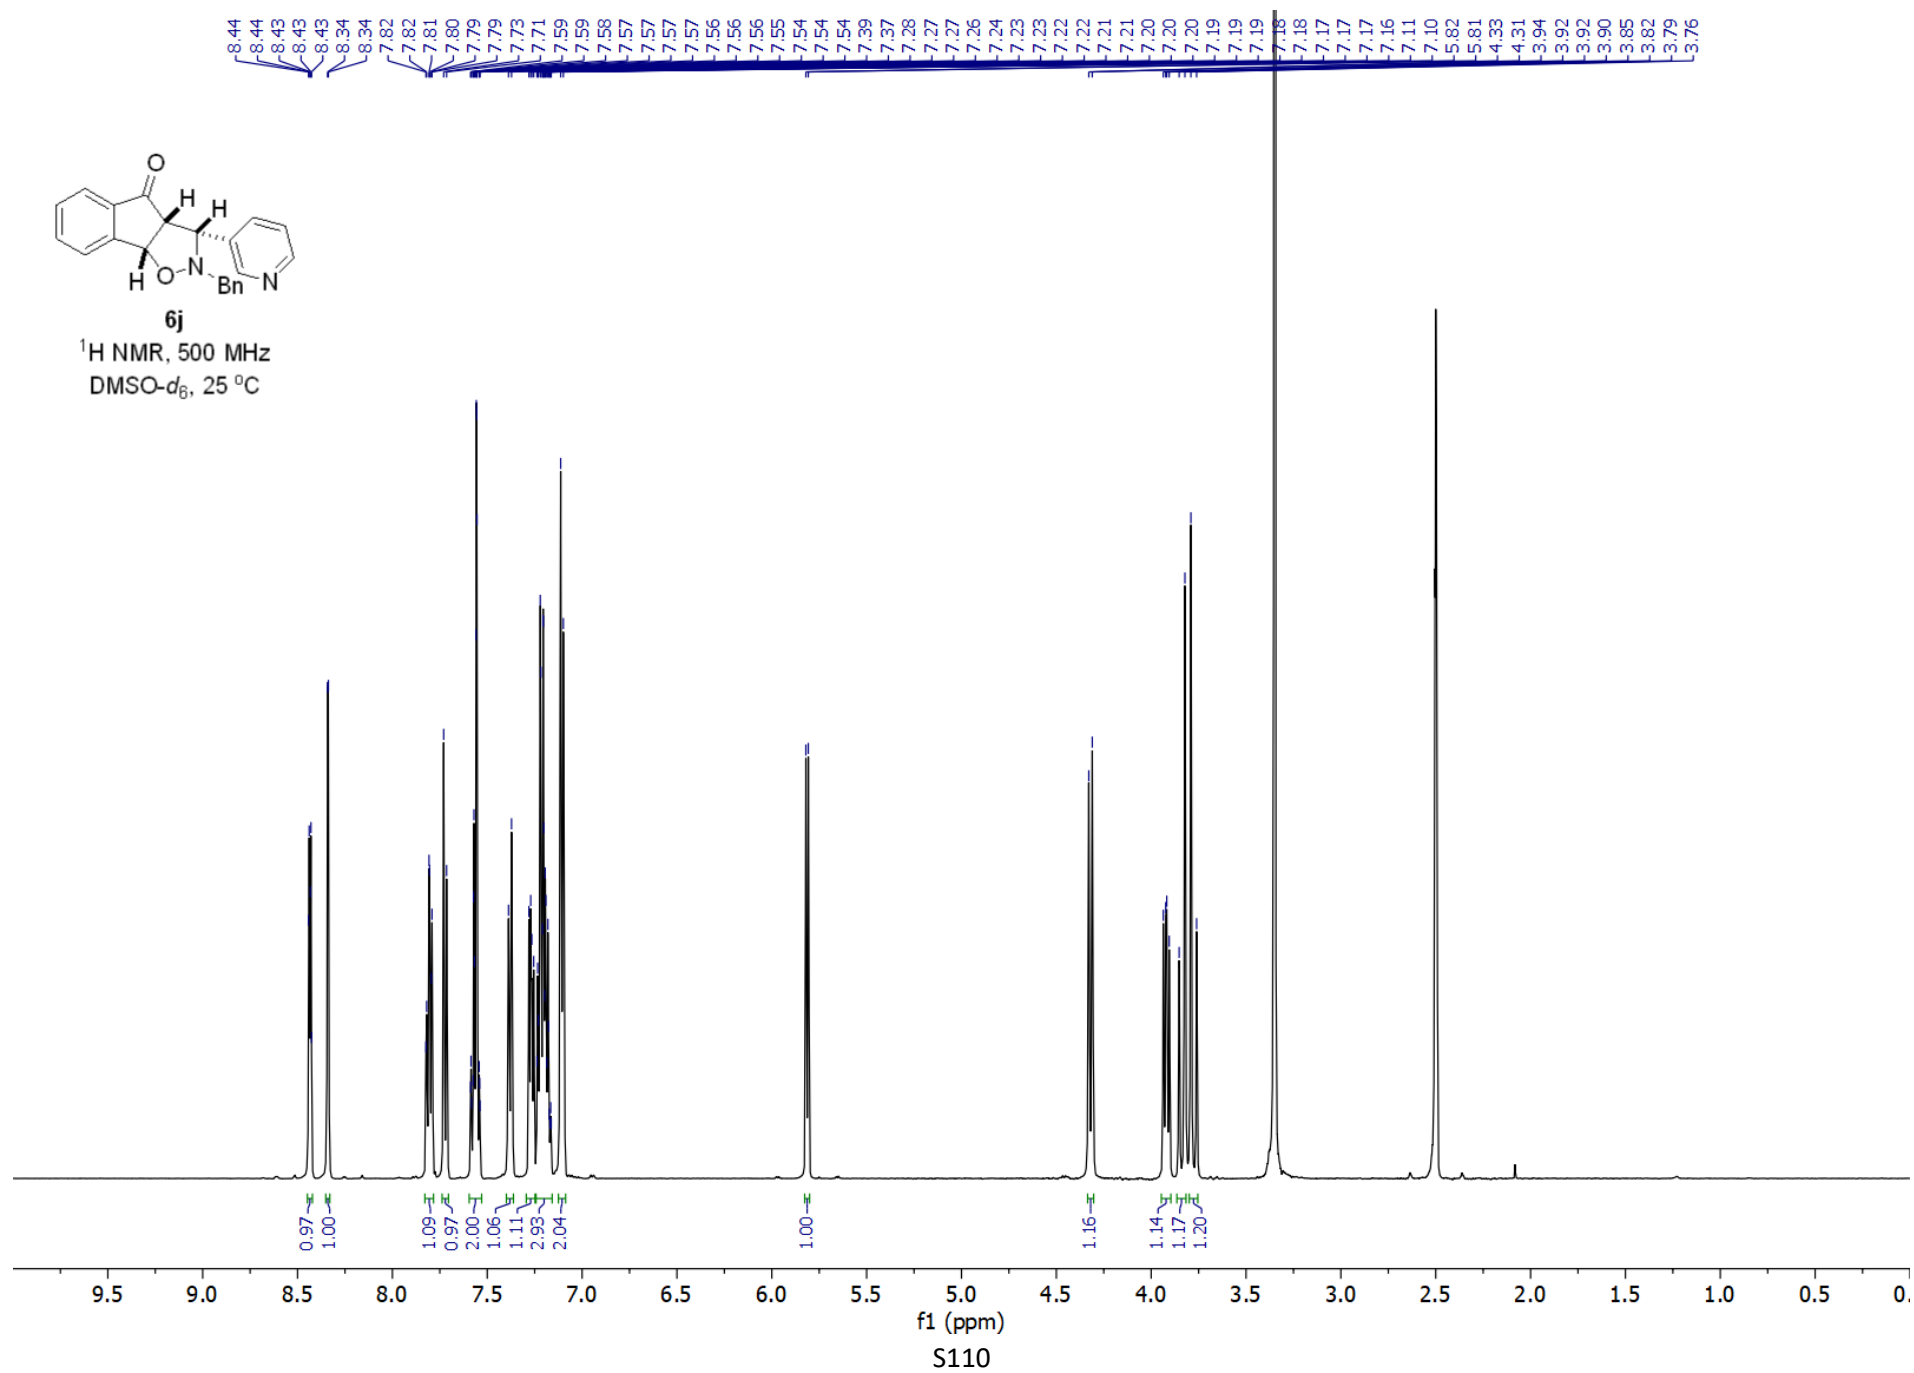

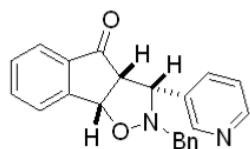

**6j**

$^{13}\text{C}$  NMR, 125 MHz  
DMSO- $d_6$ , 25  $^{\circ}\text{C}$

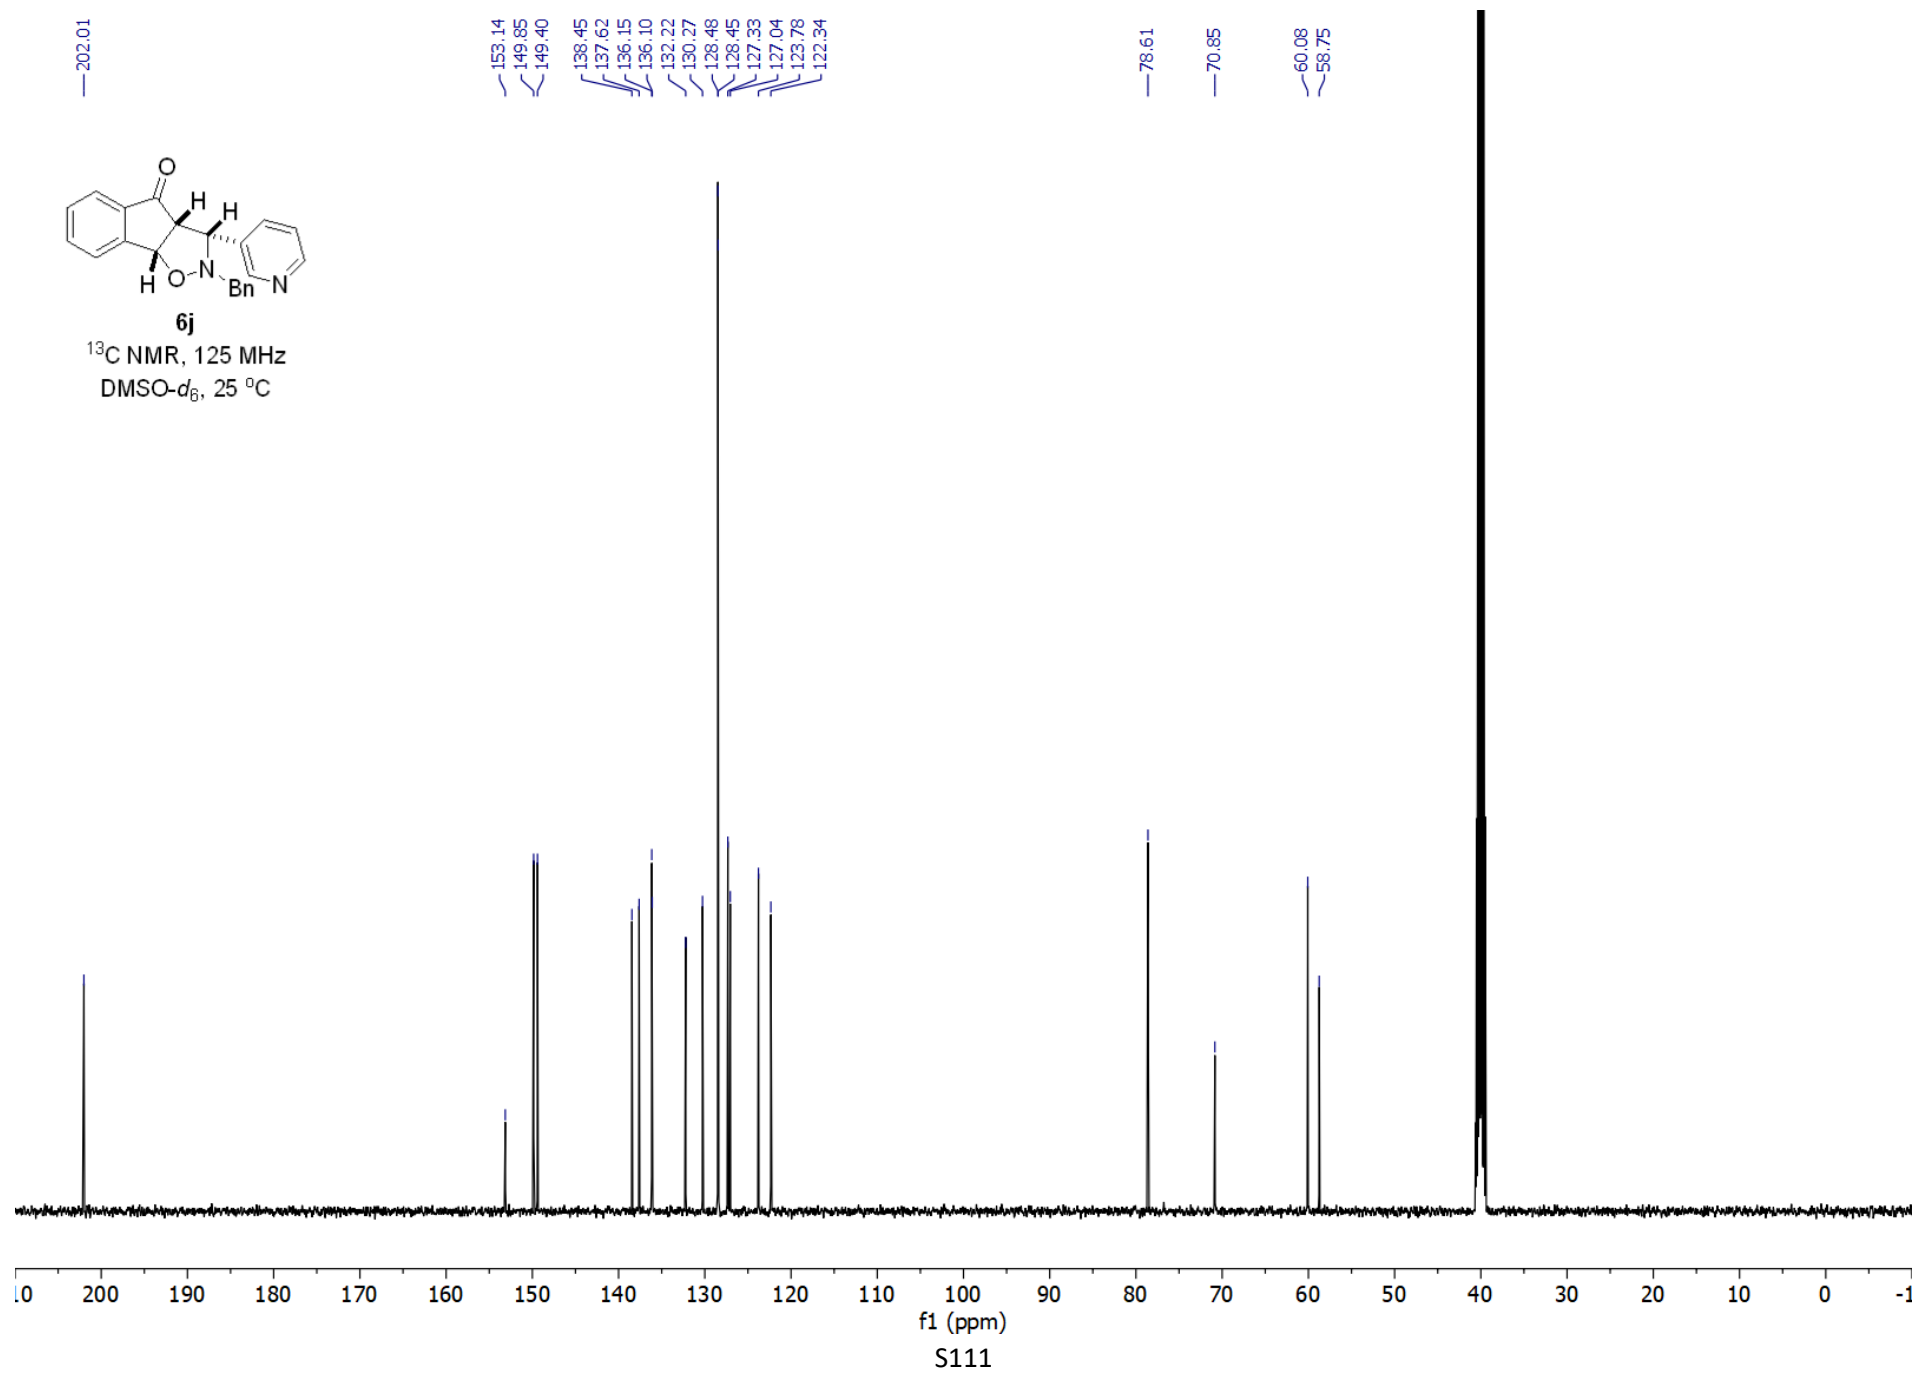

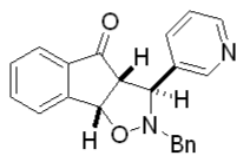

7j

$^1\text{H}$  NMR, 500 MHz  
DMSO- $d_6$ , 60  $^\circ\text{C}$

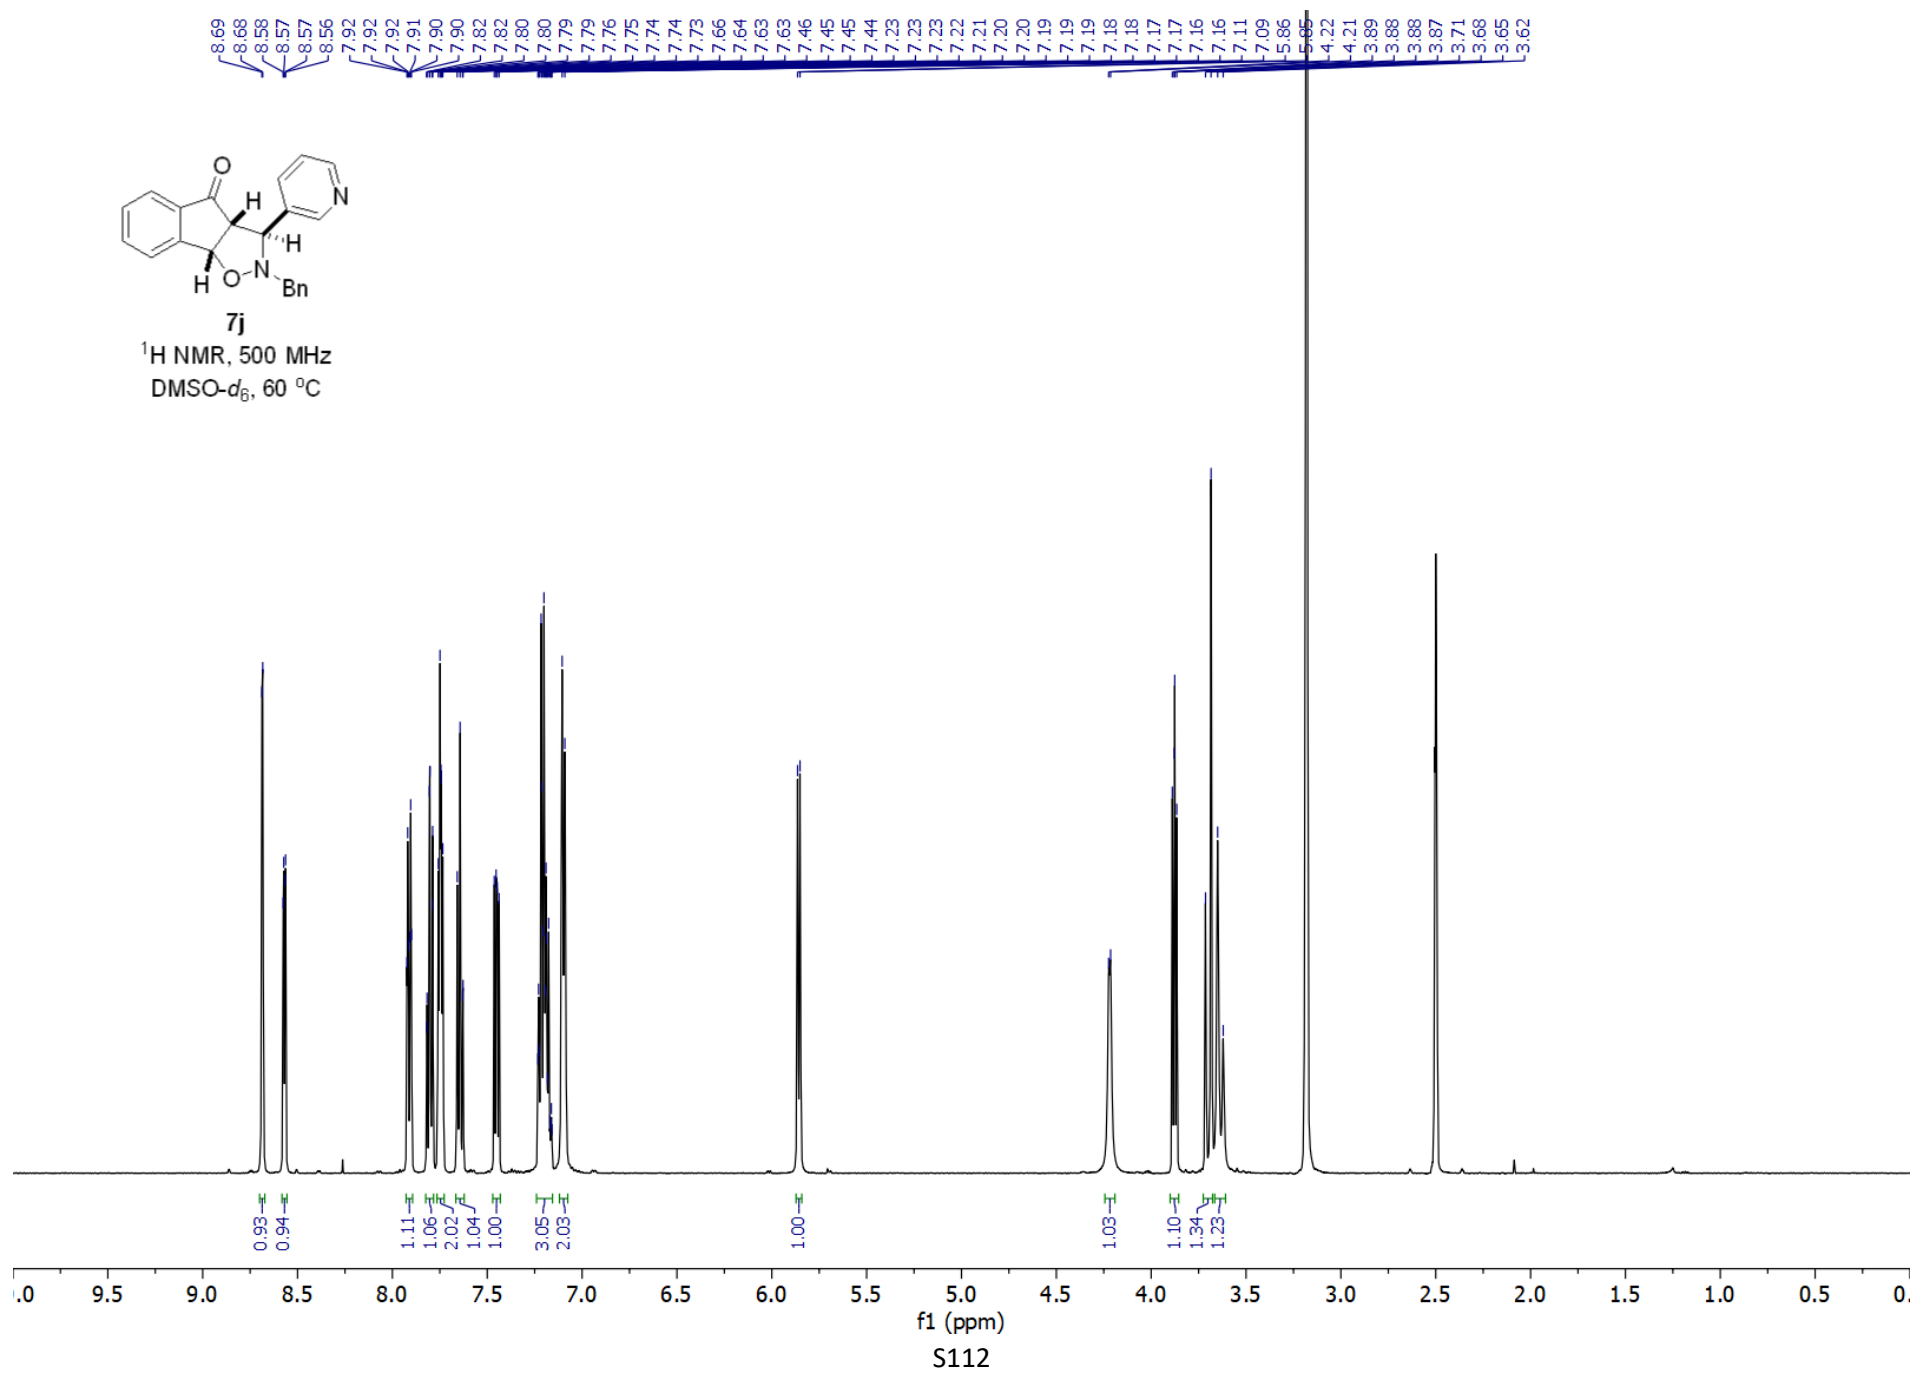

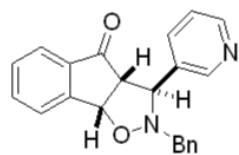

7j

$^{13}\text{C}$  NMR, 125 MHz

$\text{DMSO-}d_6$ , 60  $^{\circ}\text{C}$

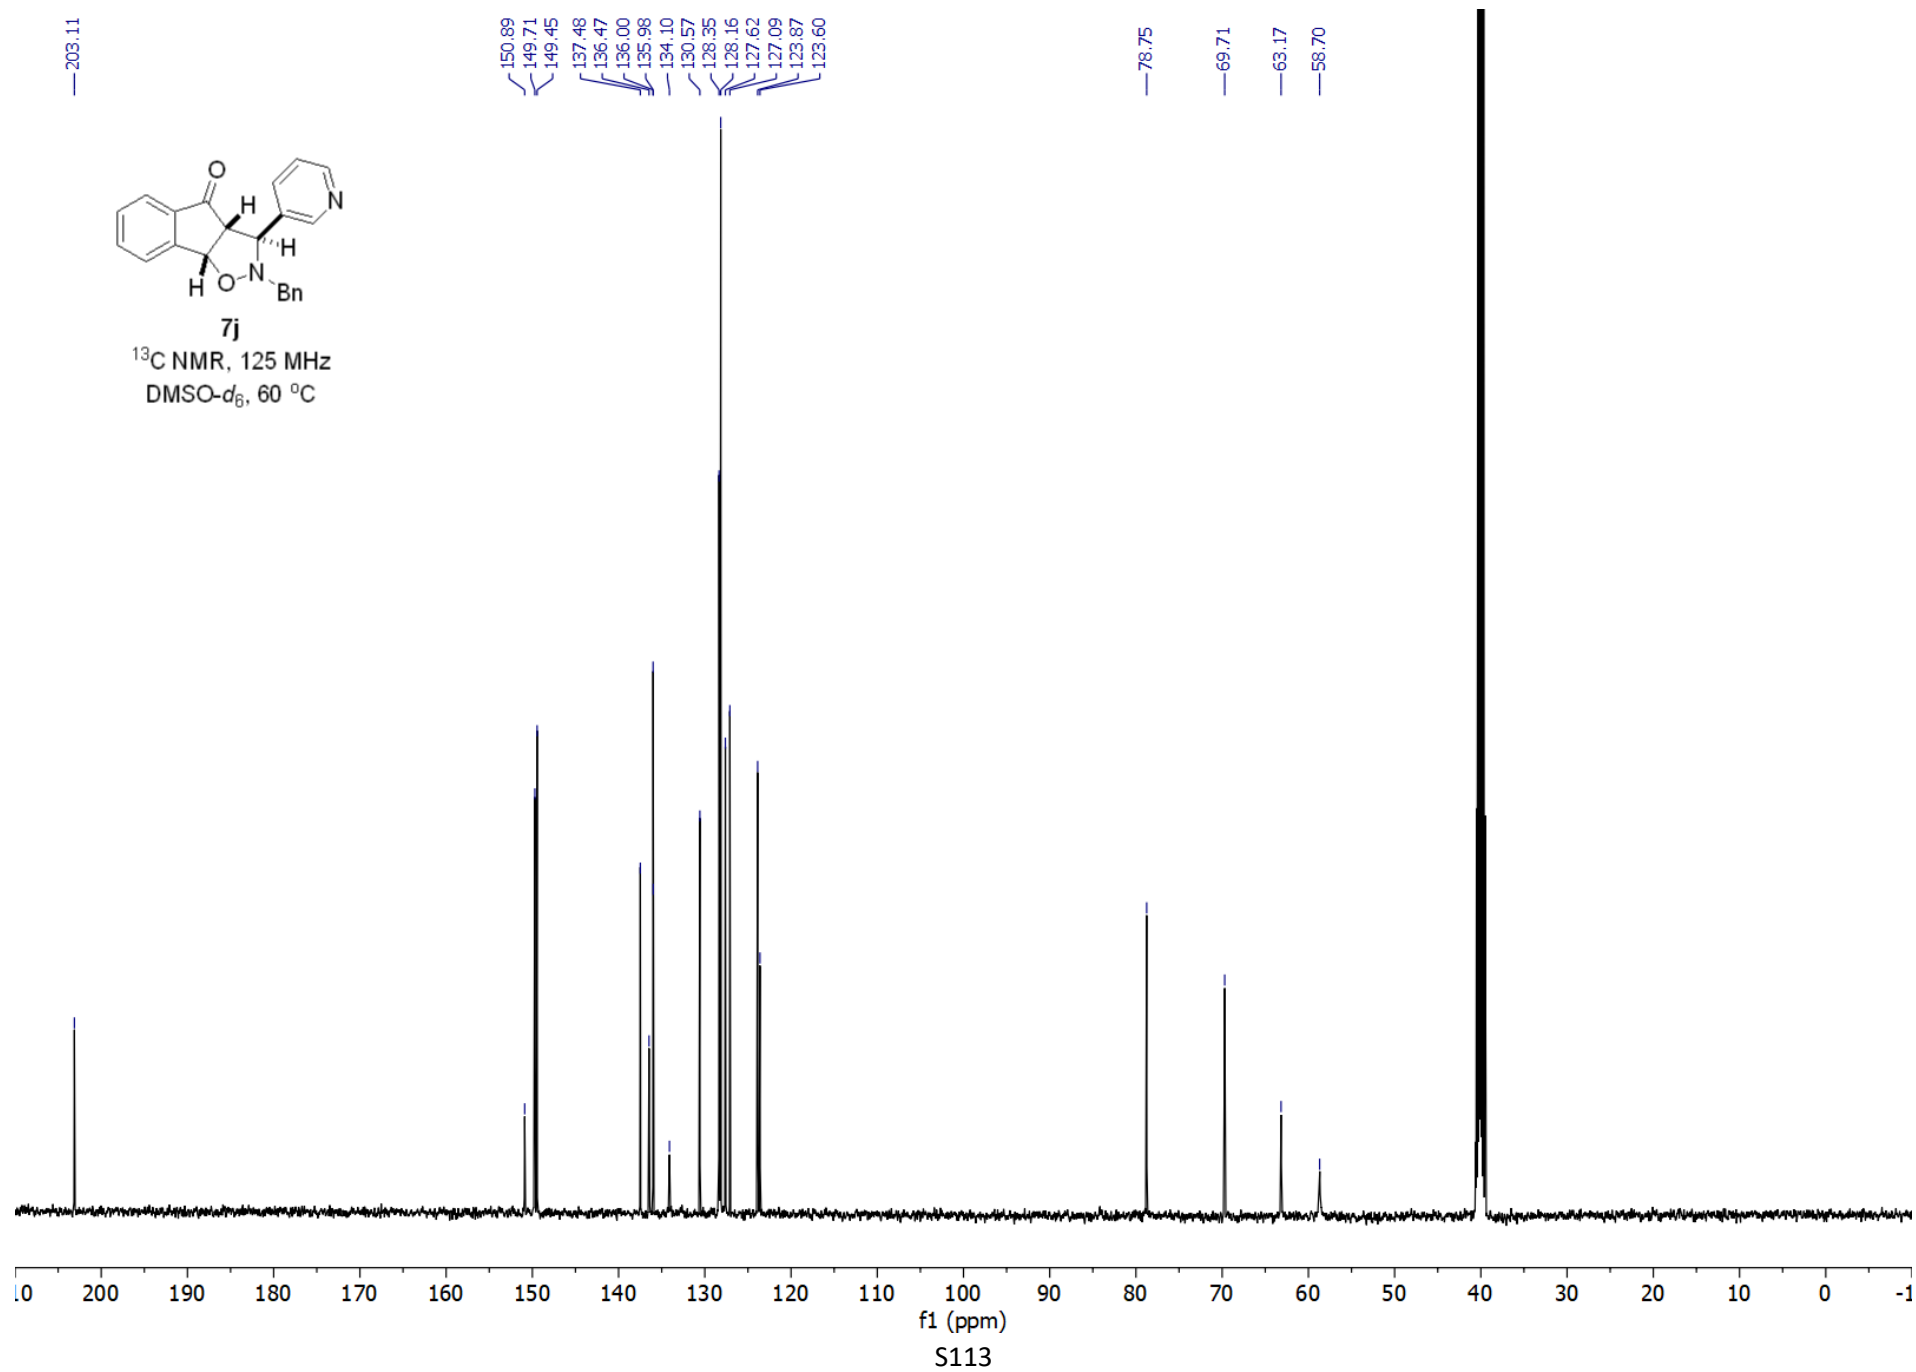

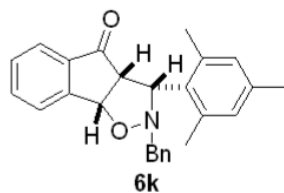

$^1\text{H}$  NMR, 500 MHz  
DMSO- $d_6$ , 25  $^\circ\text{C}$

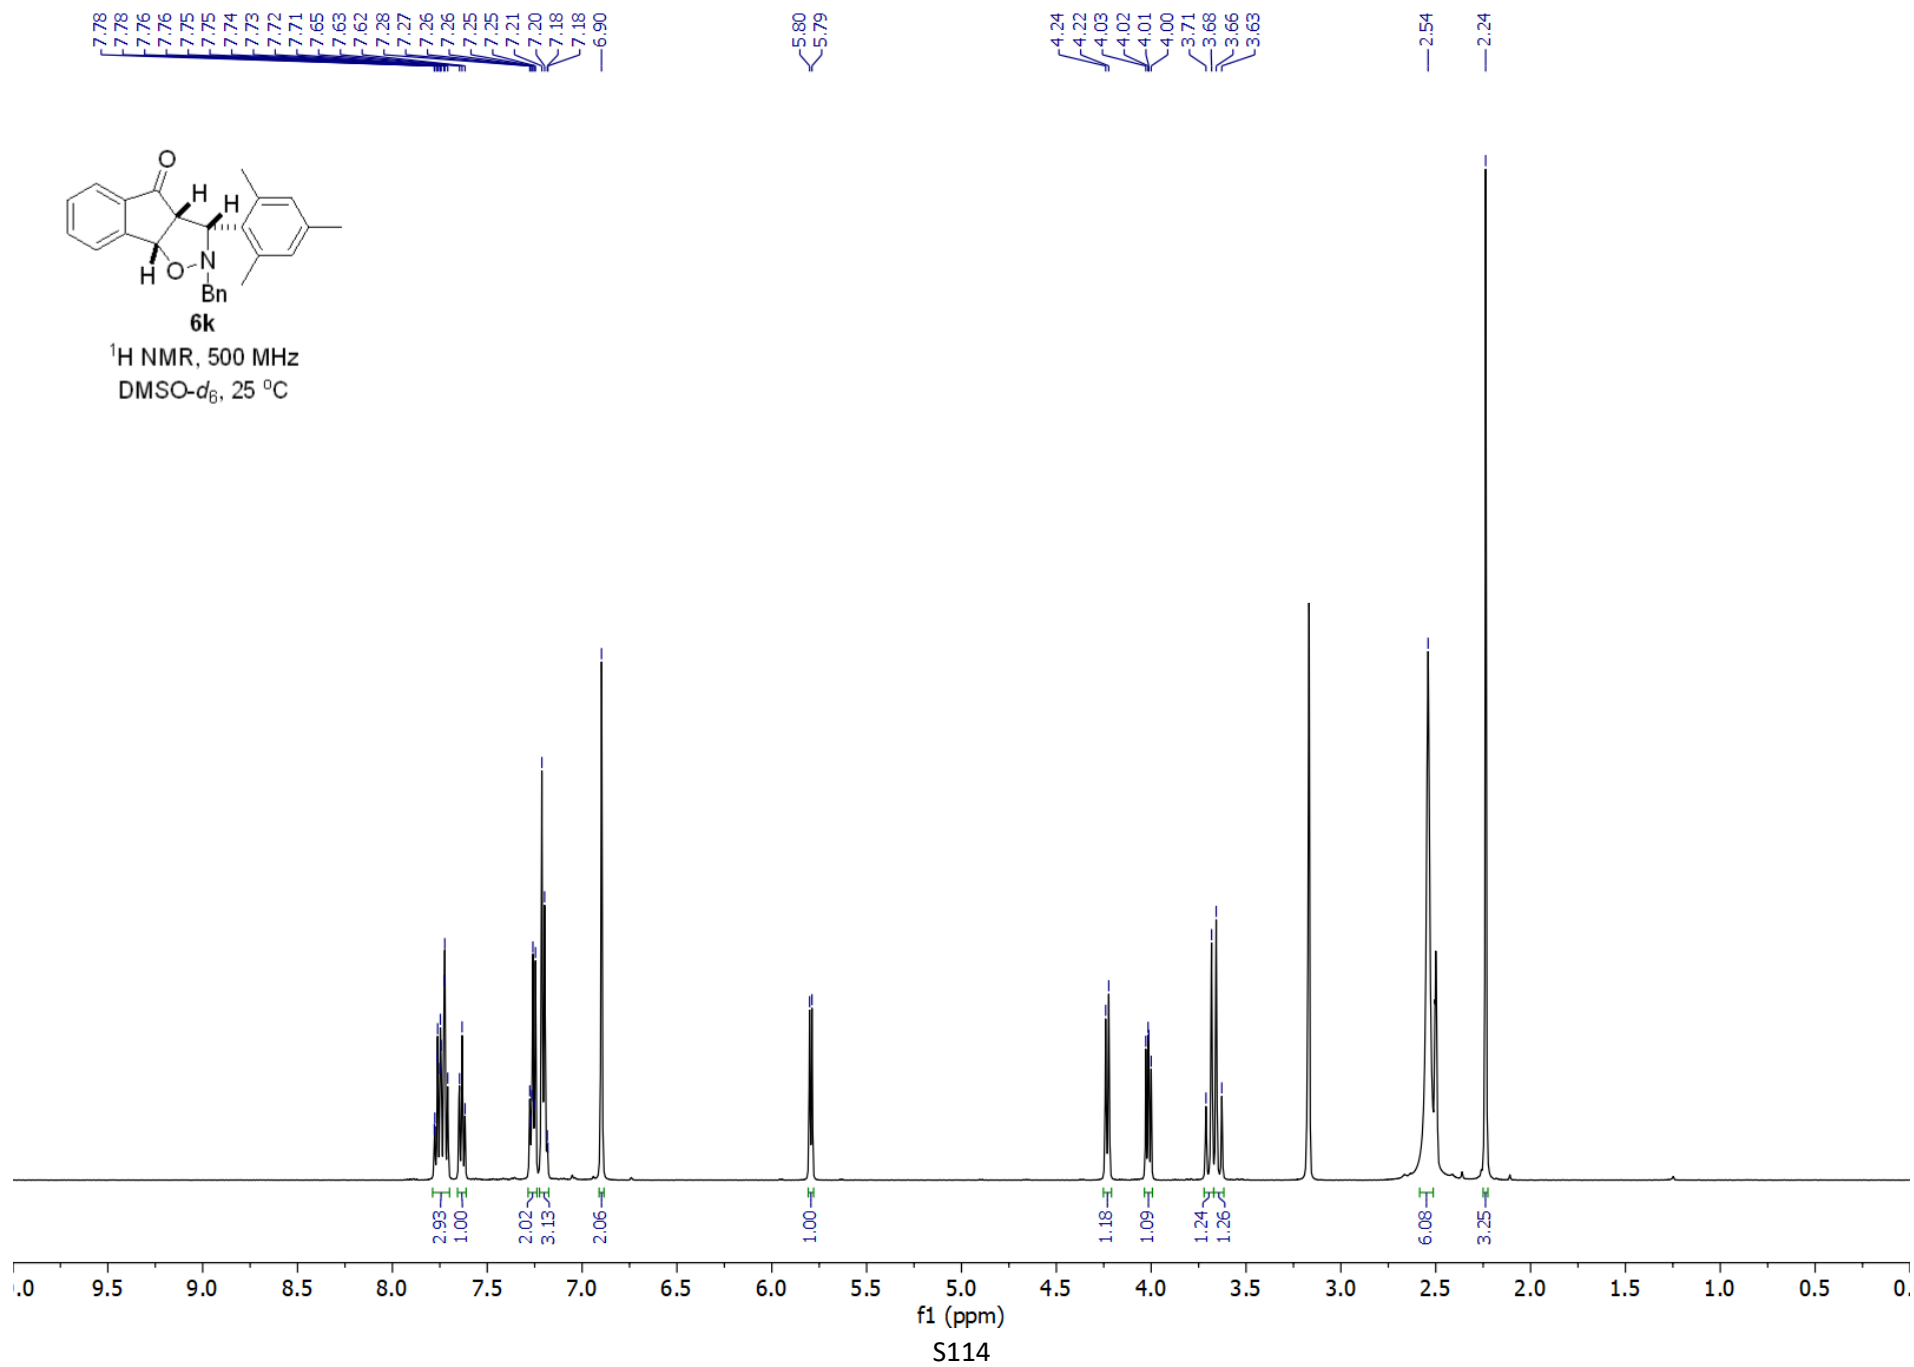

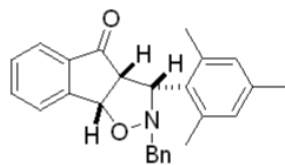

**6k**

$^{13}\text{C}$  NMR, 125 MHz  
DMSO- $d_6$ , 25 °C

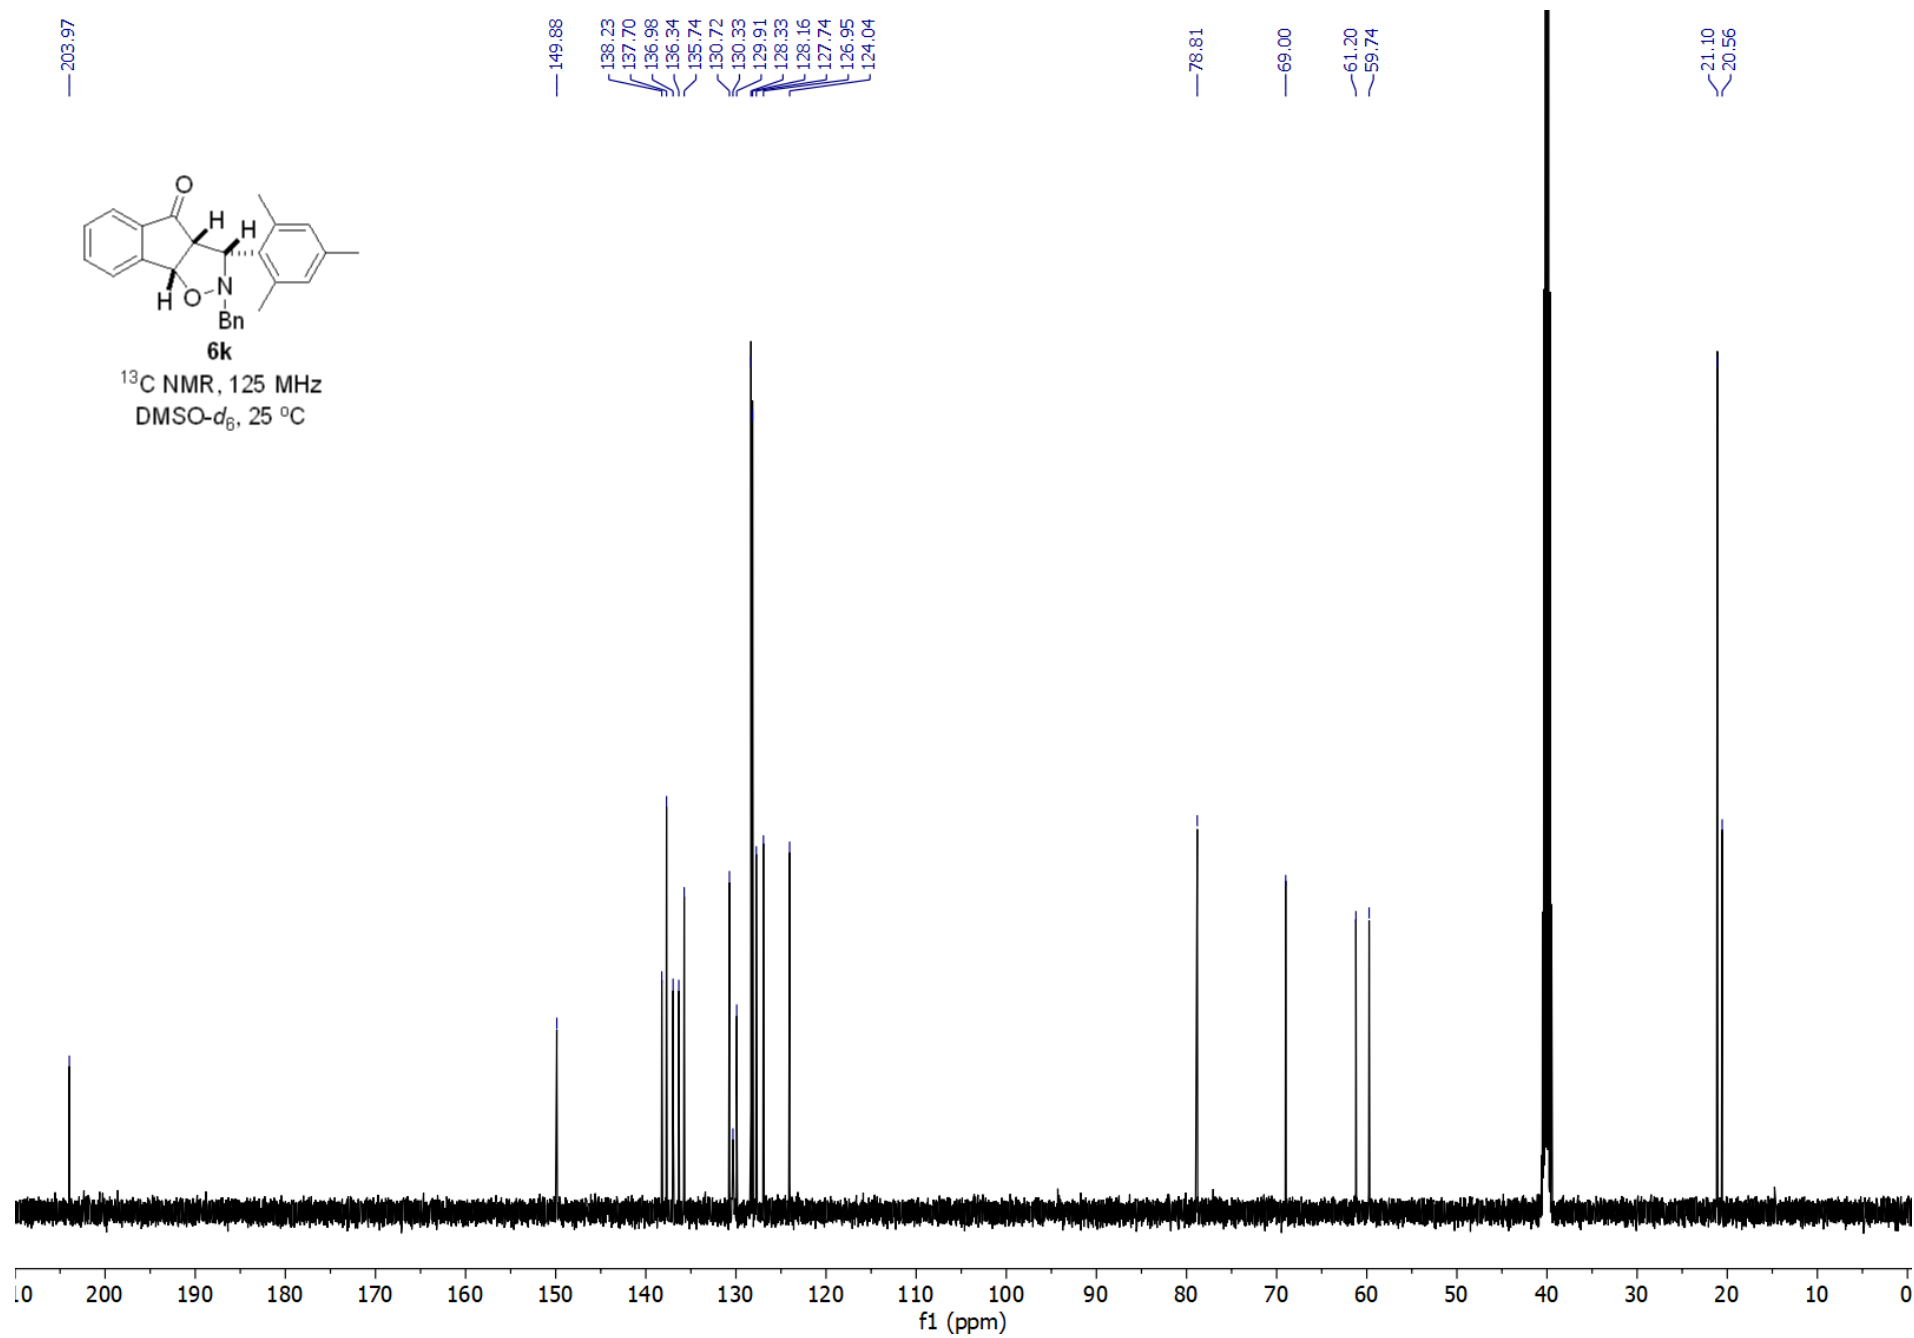

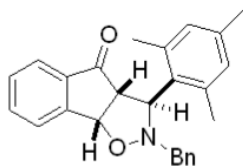

**7k**

$^1\text{H}$  NMR, 500 MHz  
DMSO- $d_6$ , 60  $^\circ\text{C}$

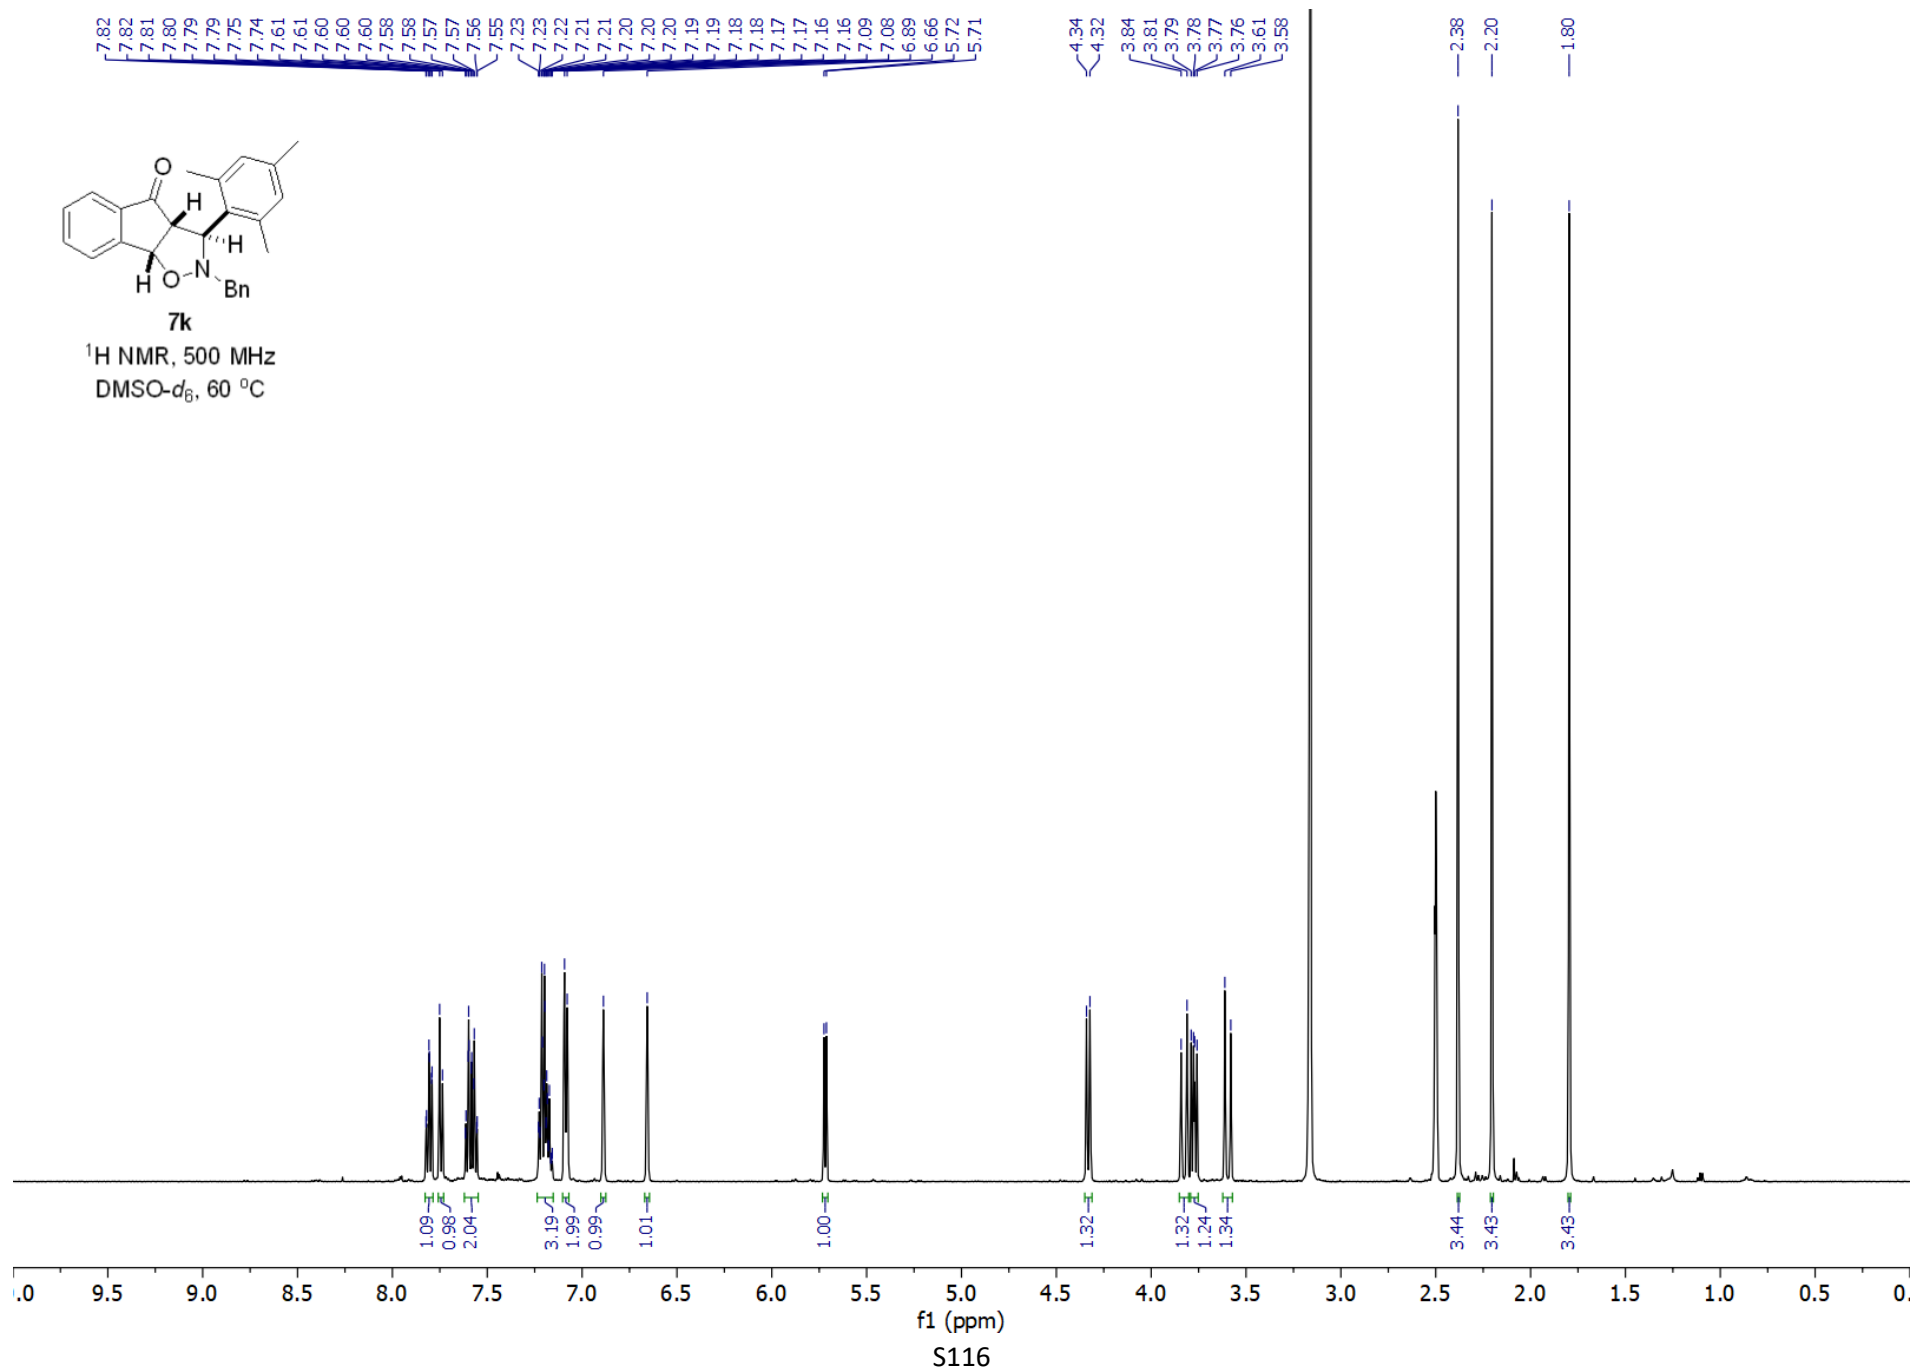

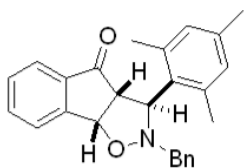

7k

$^{13}\text{C}$  NMR, 125 MHz

$\text{DMSO-}d_6$ , 60  $^{\circ}\text{C}$

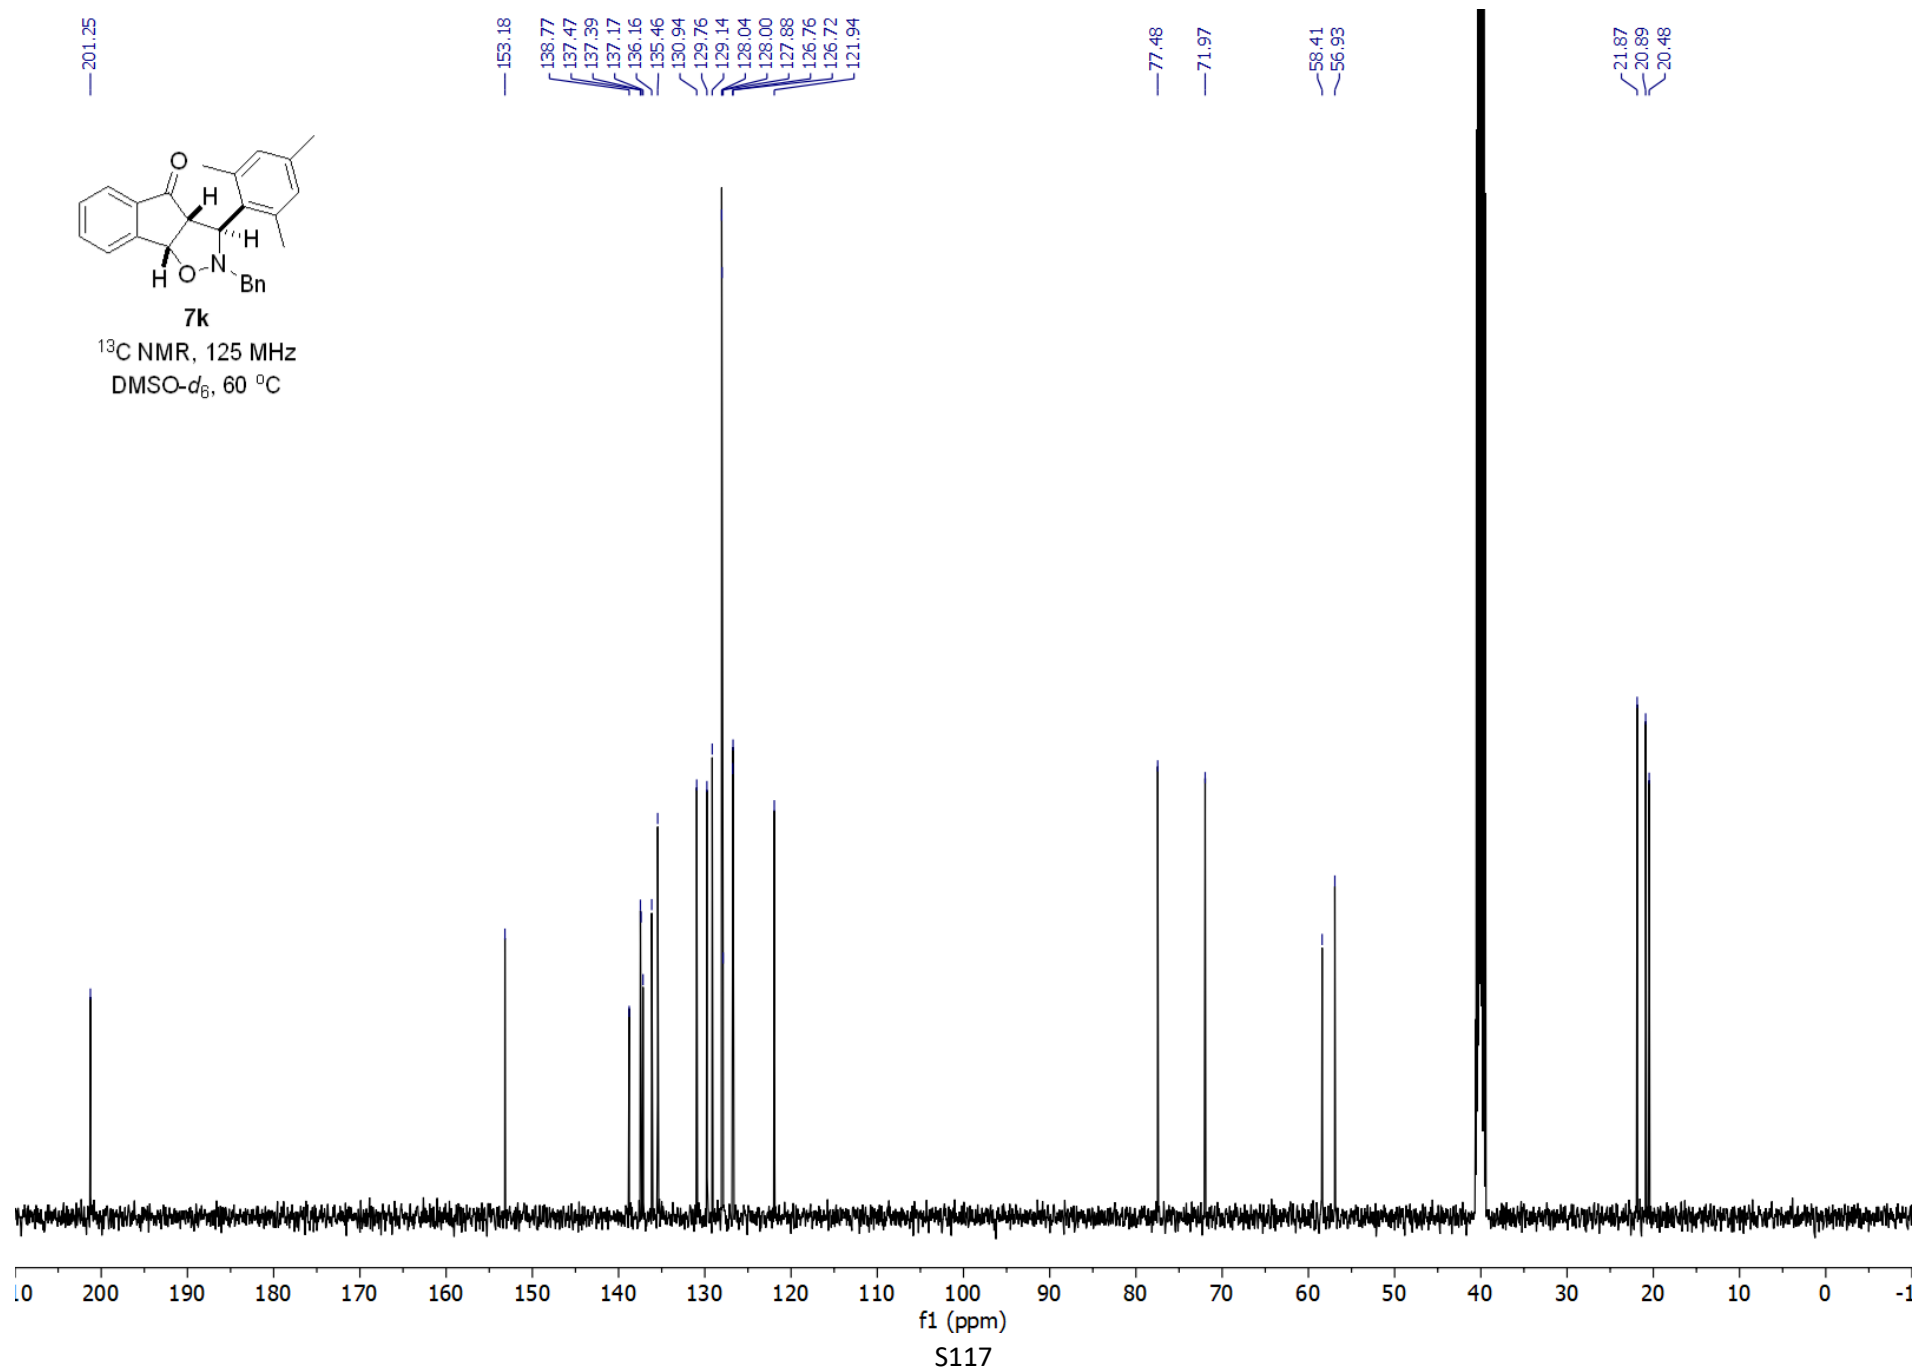

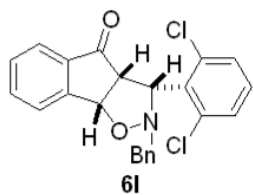

$^1\text{H}$  NMR, 500 MHz  
DMSO- $d_6$ , 25 °C

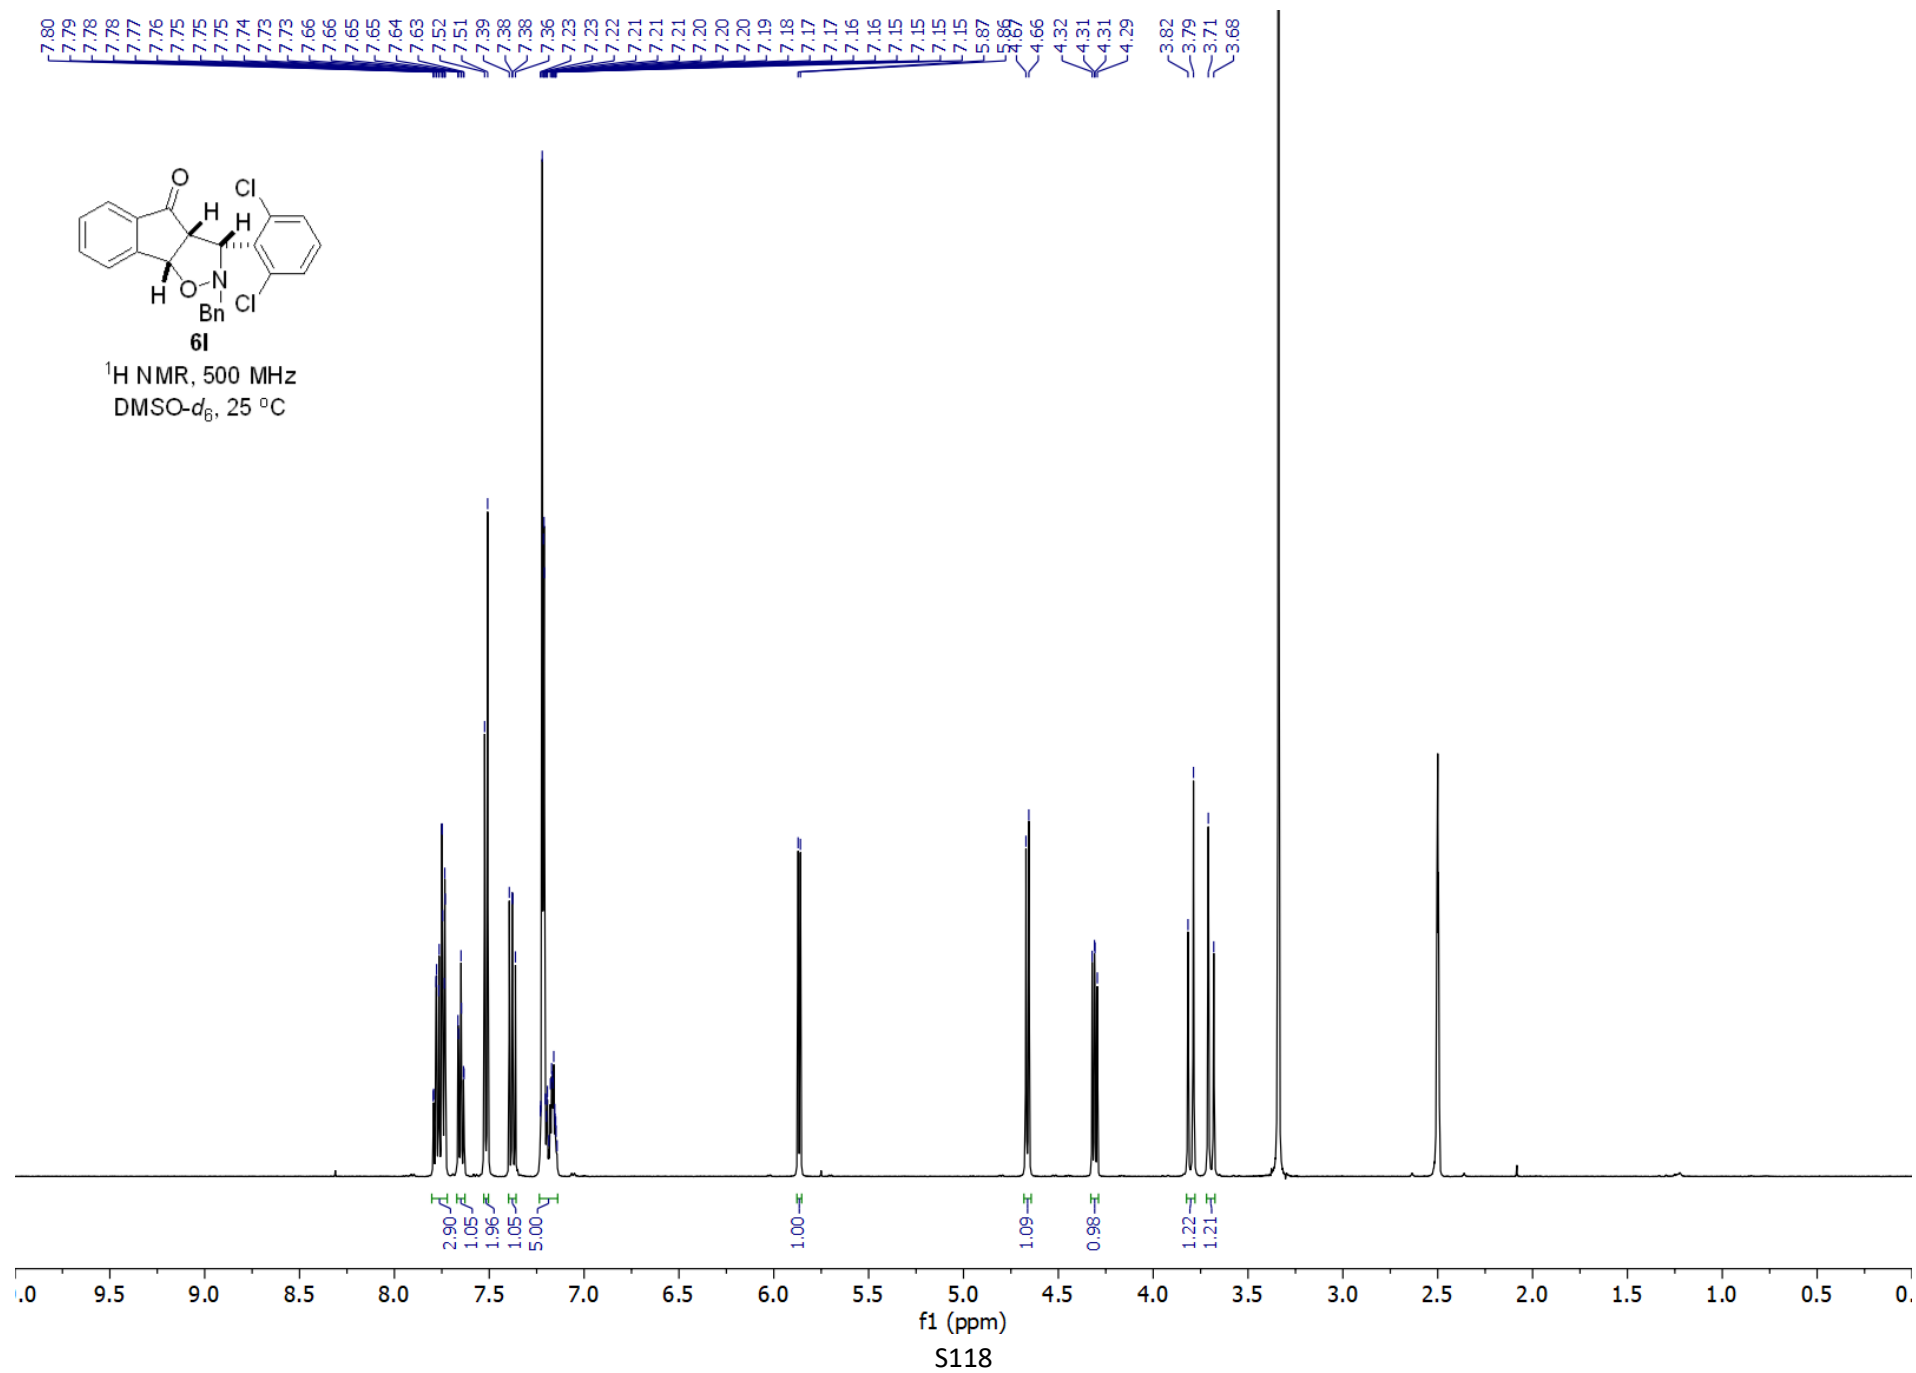

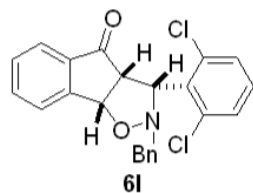

$^{13}\text{C}$  NMR, 125 MHz  
DMSO- $d_6$ , 25 °C

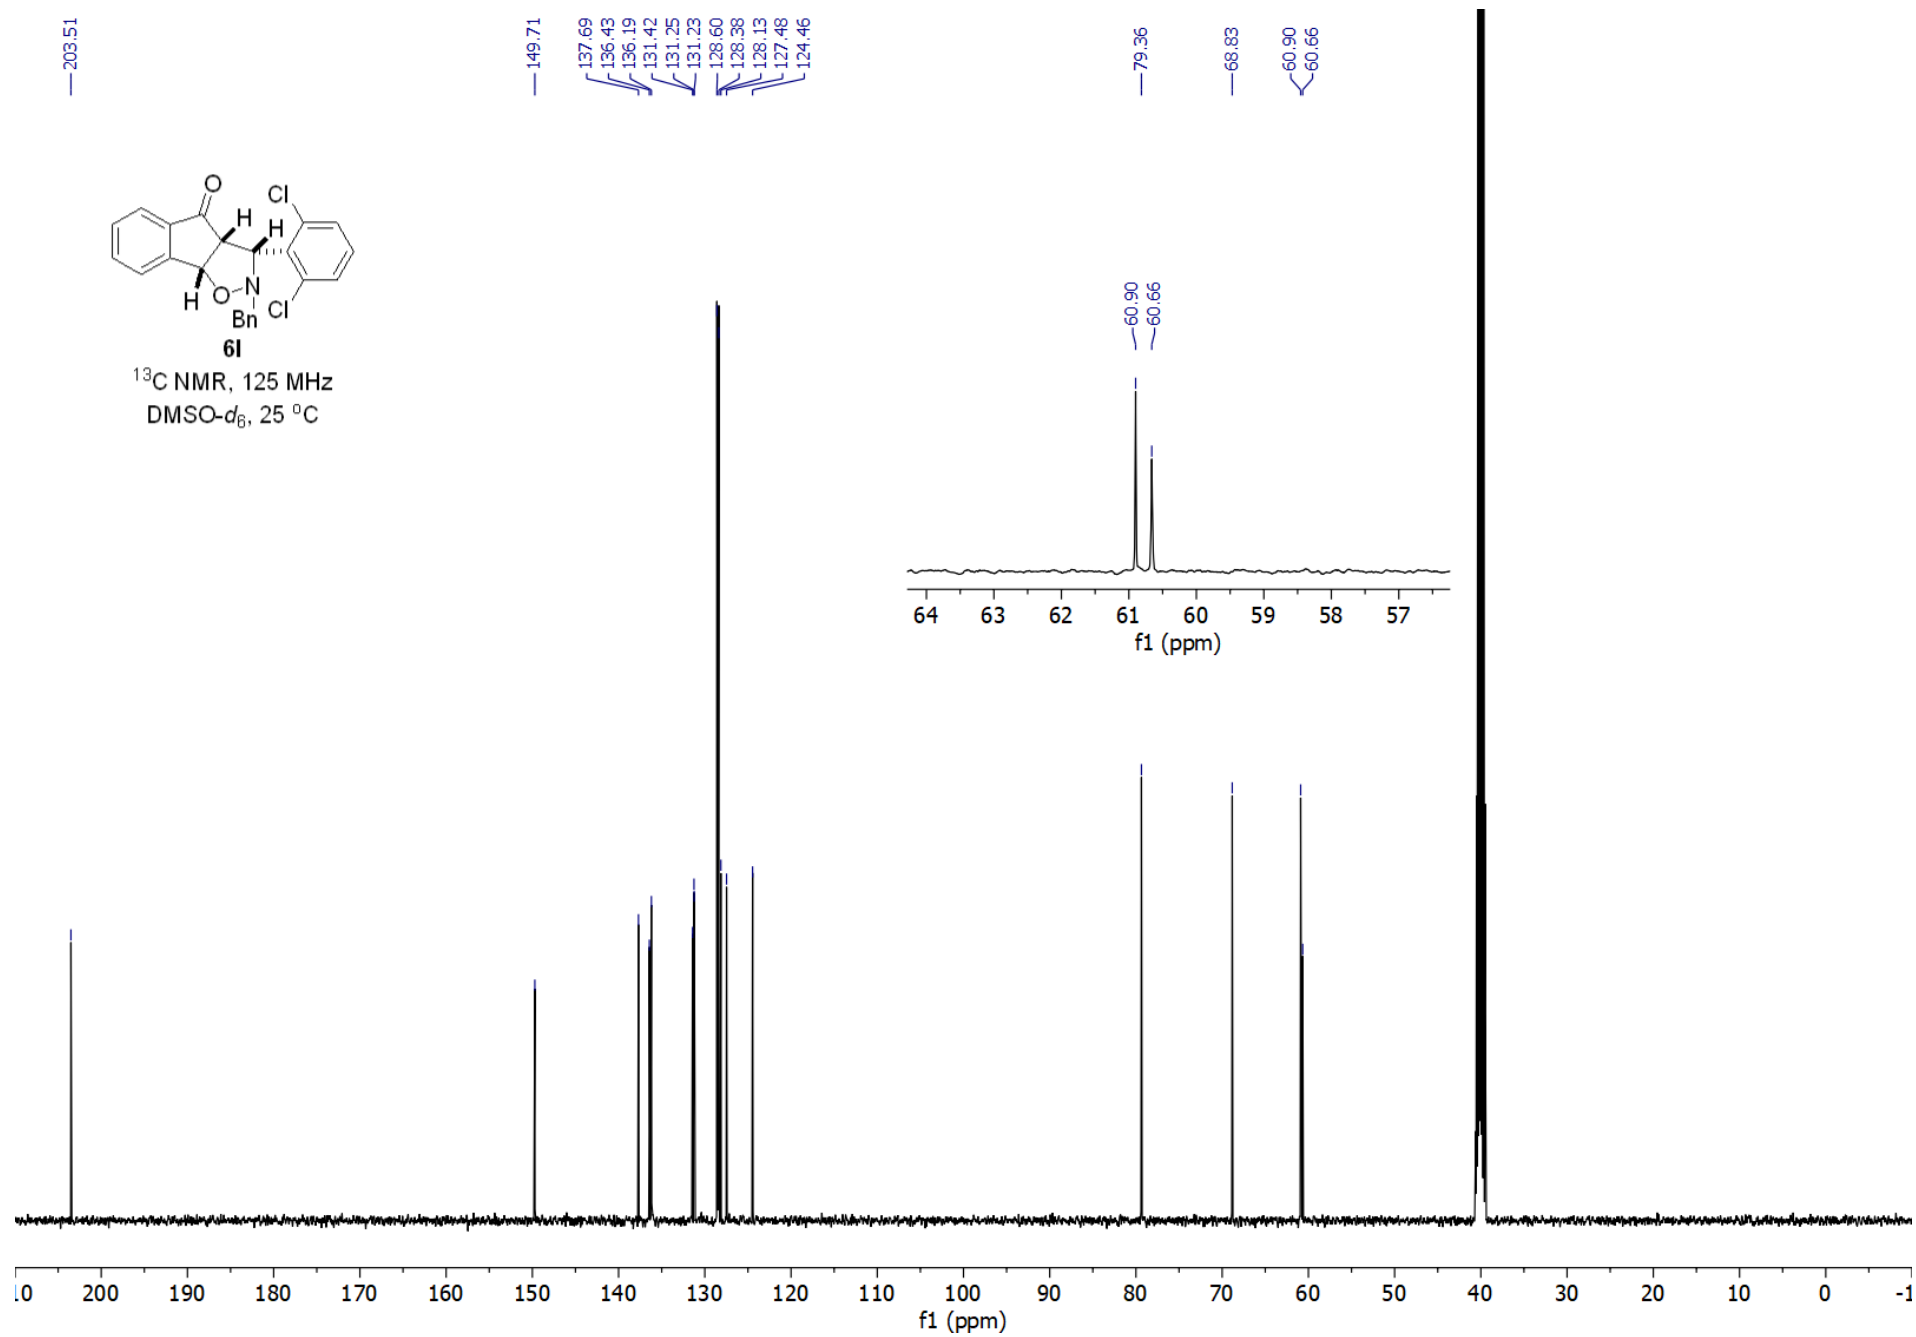

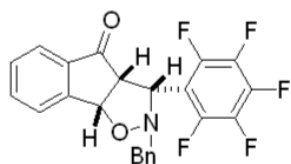

**6m**

$^1\text{H}$  NMR, 500 MHz

$\text{DMSO}-d_6$ , 25 °C

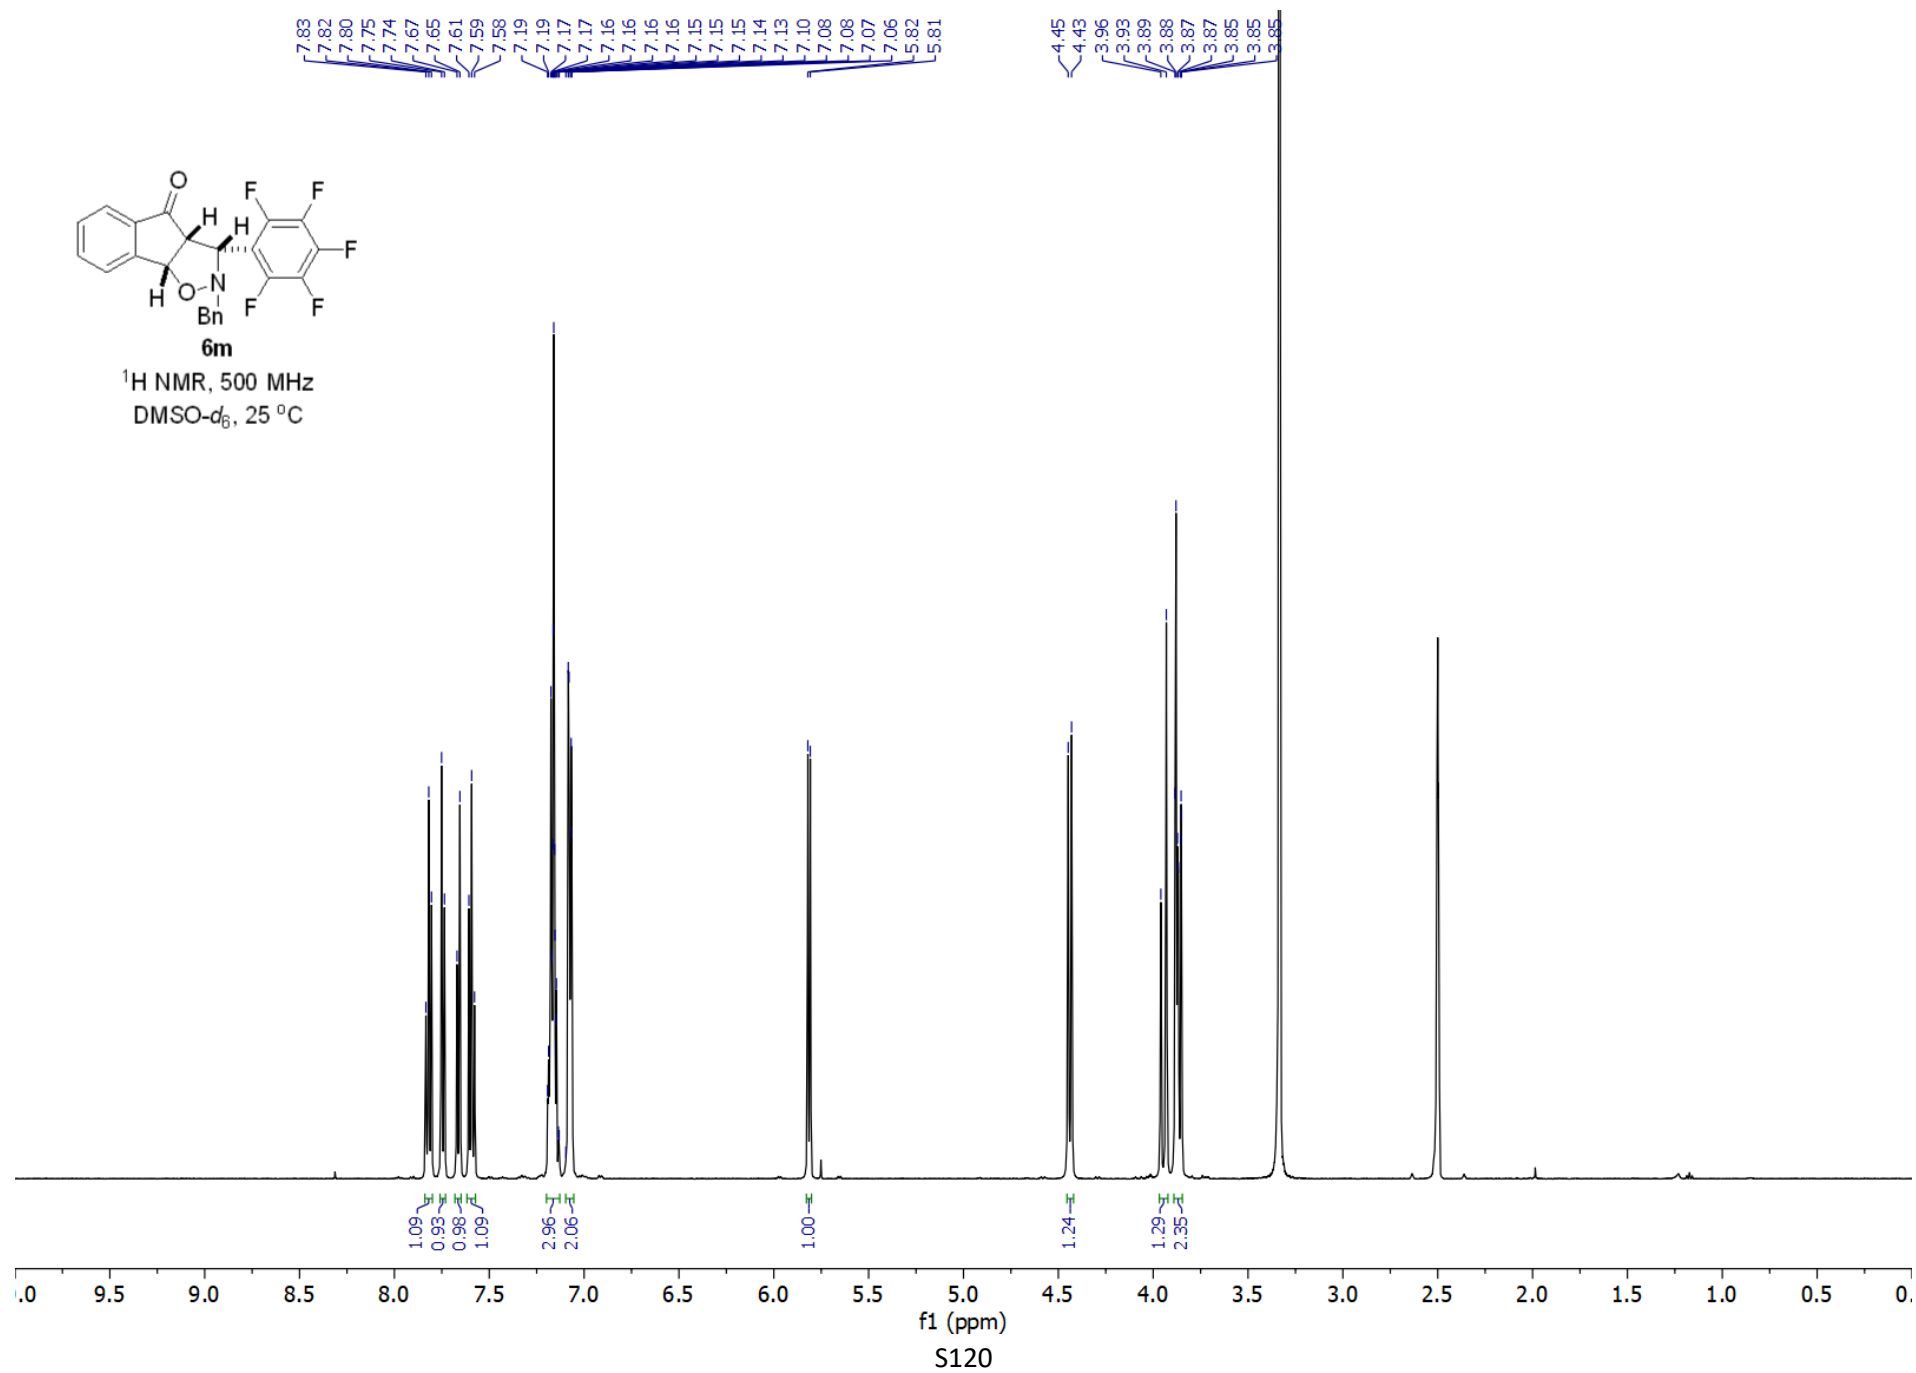

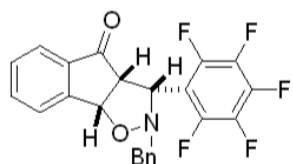

**6m**

$^{13}\text{C}$  NMR, 125 MHz

$\text{DMSO}-d_6$ , 25  $^{\circ}\text{C}$

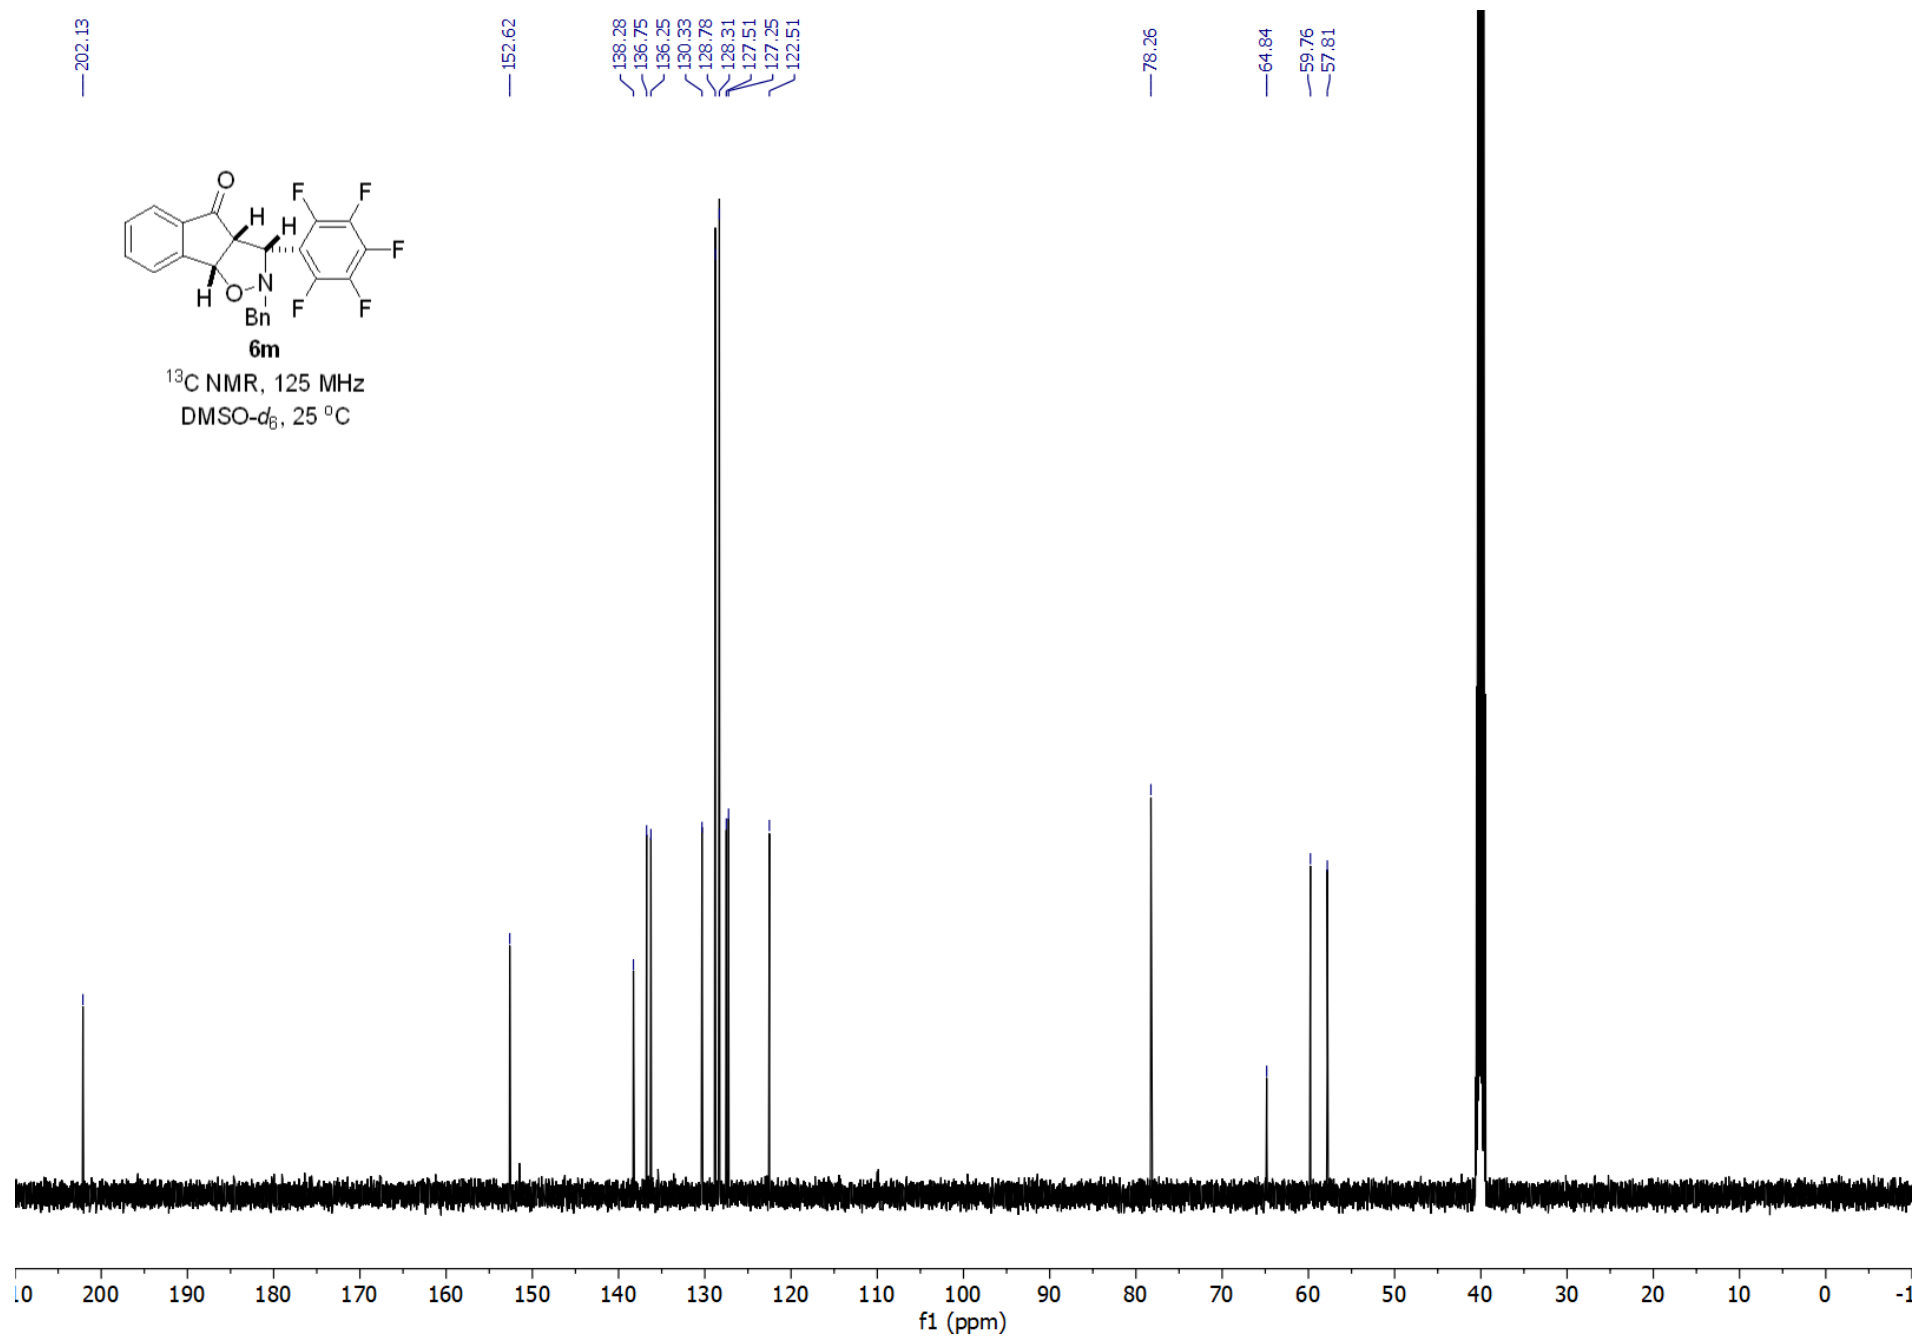

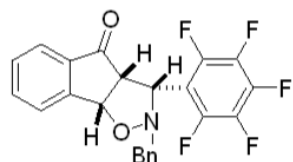

**6m**

$^{19}\text{F}$  NMR, 470 MHz

$\text{DMSO}-d_6$ , 25  $^{\circ}\text{C}$

130.32  
130.37  
141.54  
141.58  
153.34  
153.39  
153.43  
161.29  
161.33  
161.37  
161.38  
162.07  
162.12  
162.16

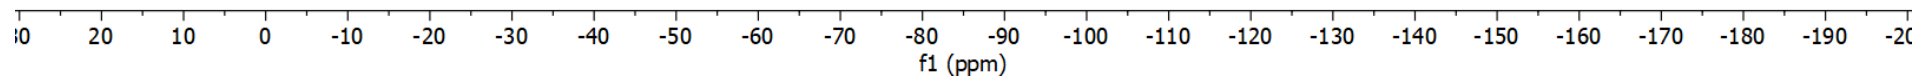

S122

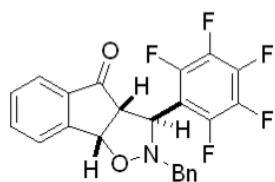

**7m**

$^1\text{H}$  NMR, 500 MHz  
DMSO- $d_6$ , 60  $^\circ\text{C}$

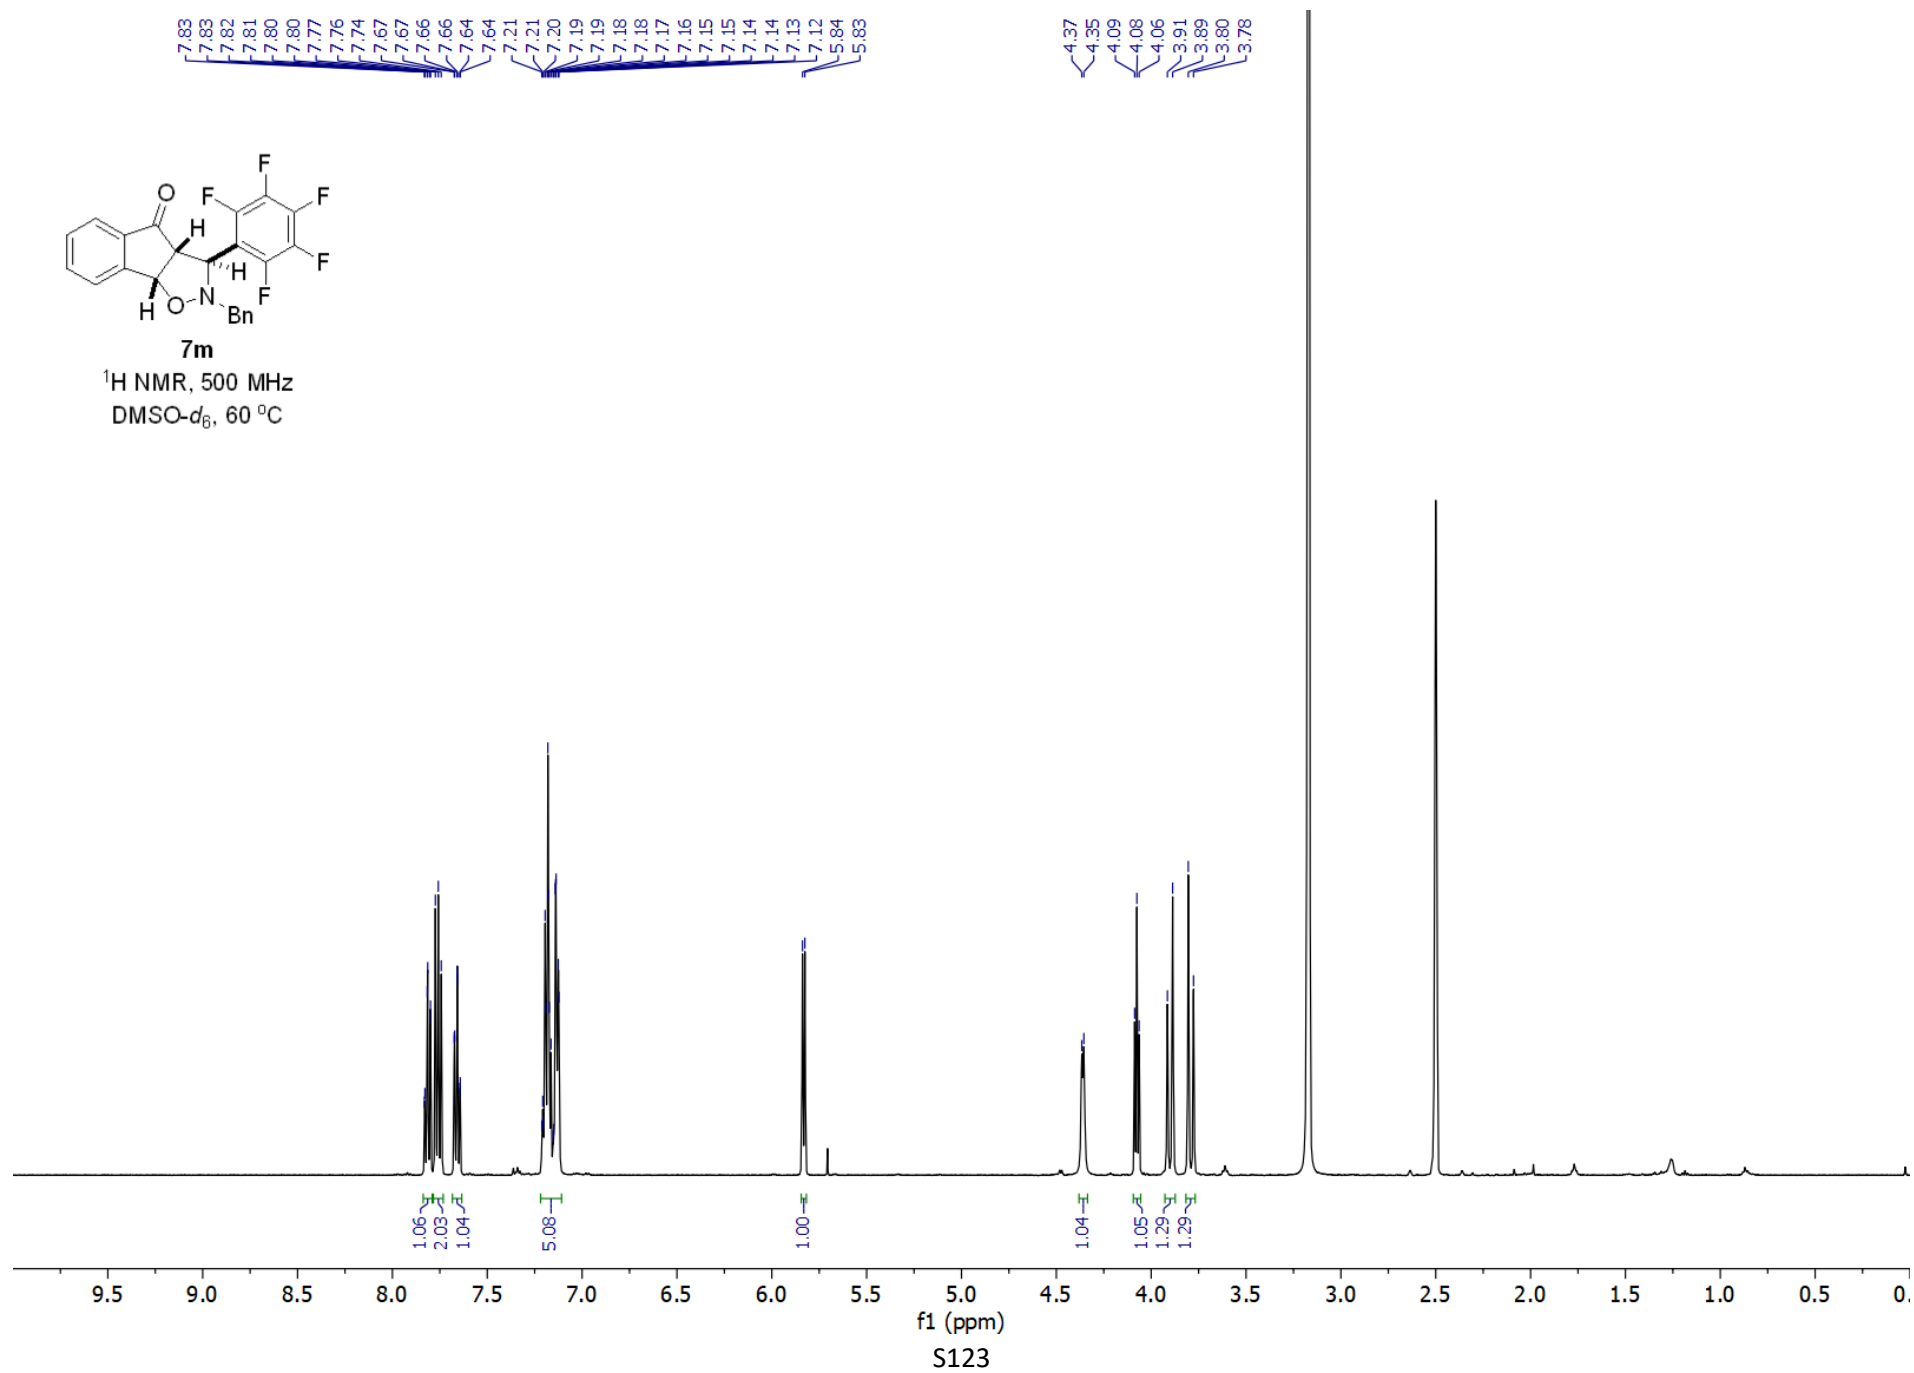

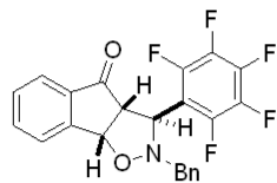

**7m**

$^{13}\text{C}$  NMR, 125 MHz  
DMSO- $d_6$ , 60 °C

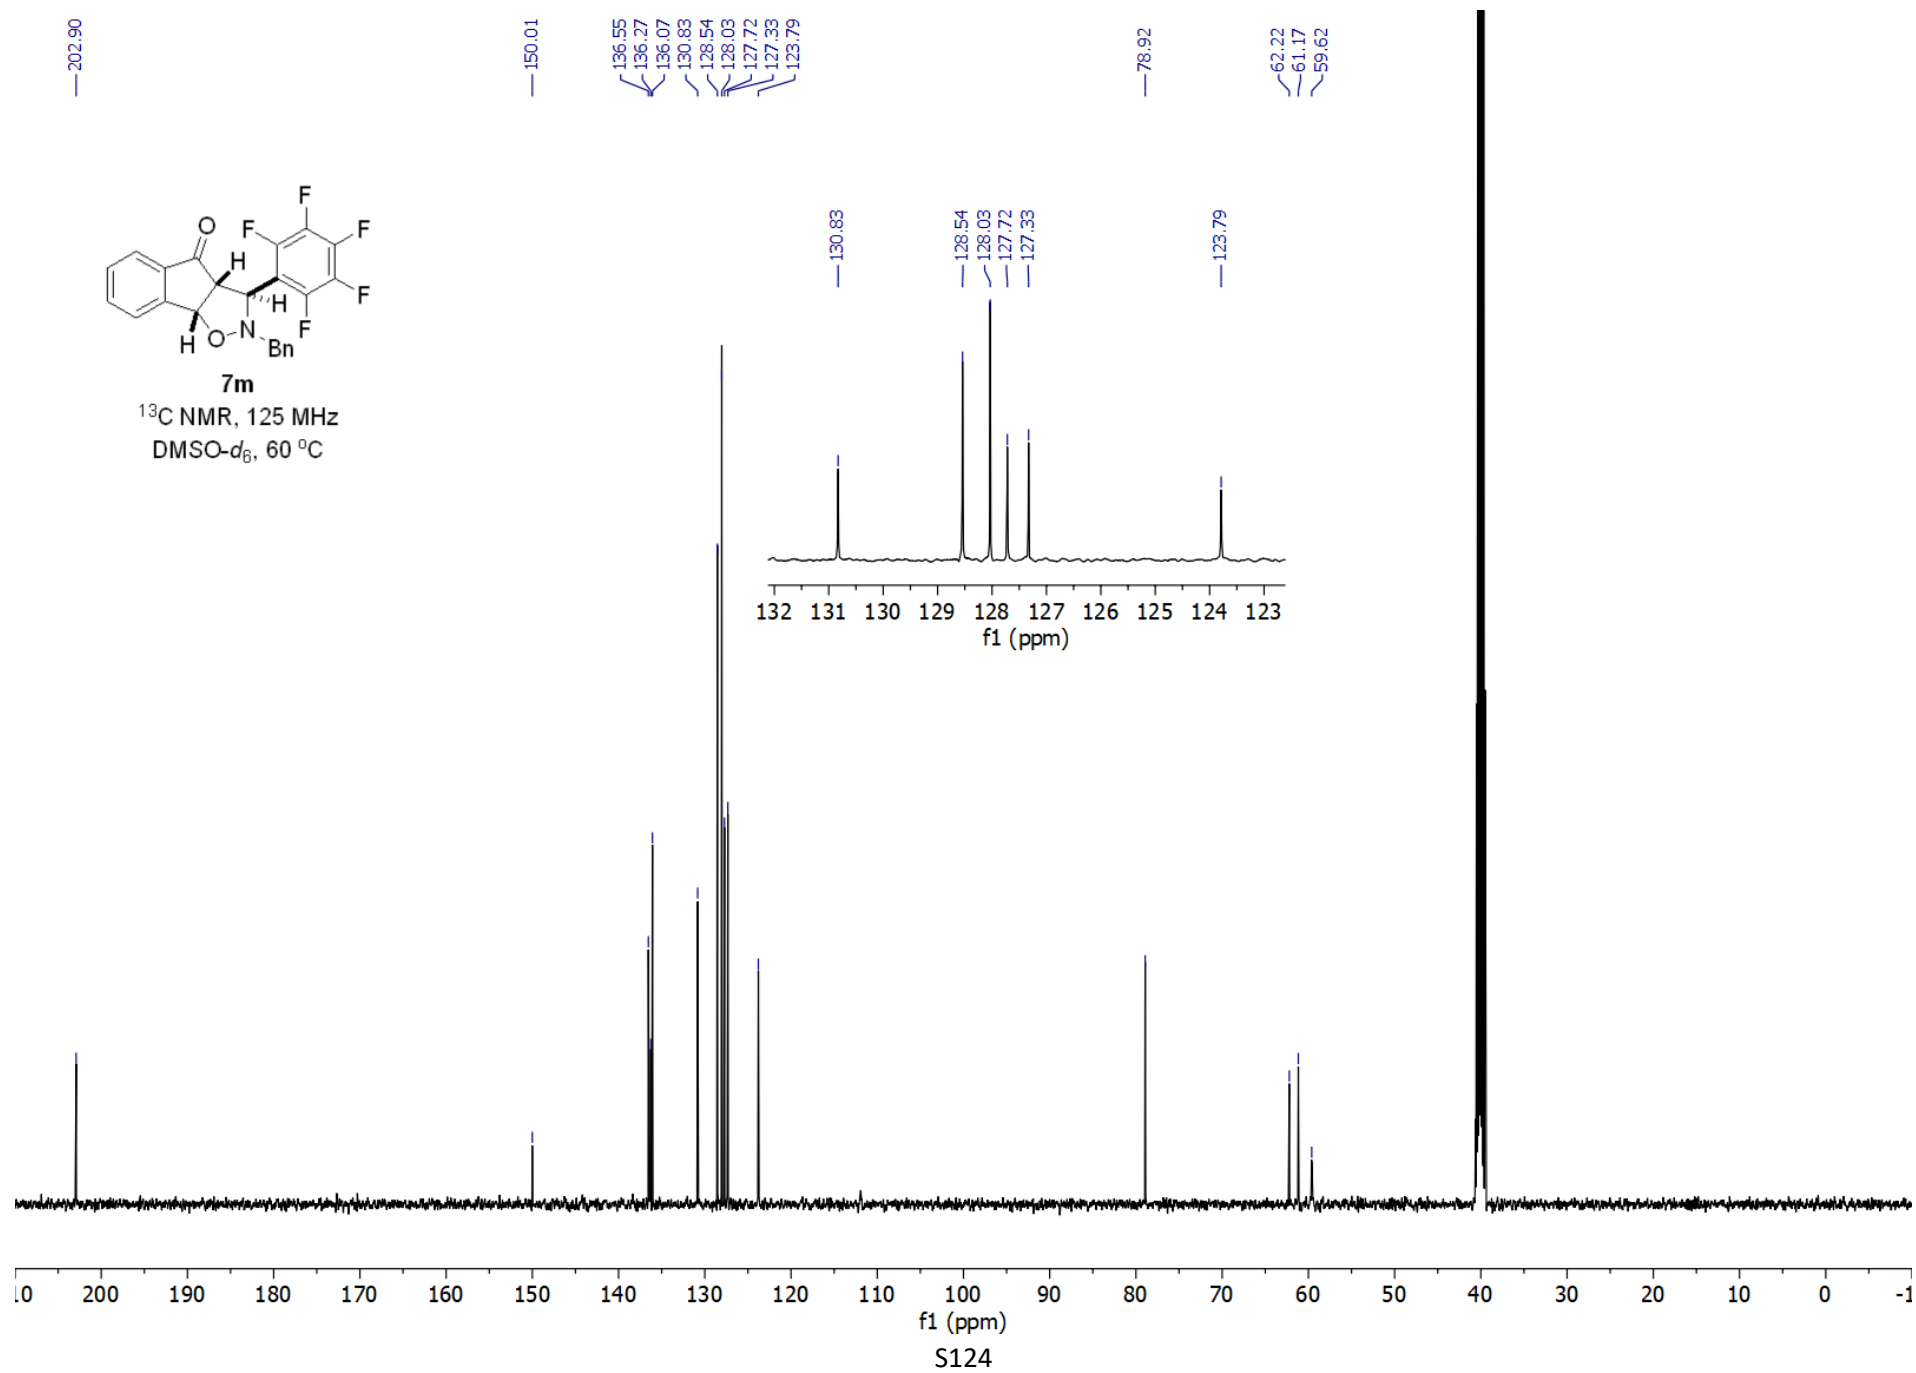

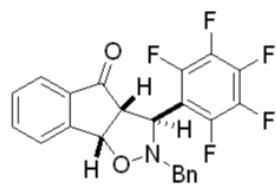

**7m**

$^{19}\text{F}$  NMR, 470 MHz

$\text{DMSO-}d_6$ , 25  $^{\circ}\text{C}$

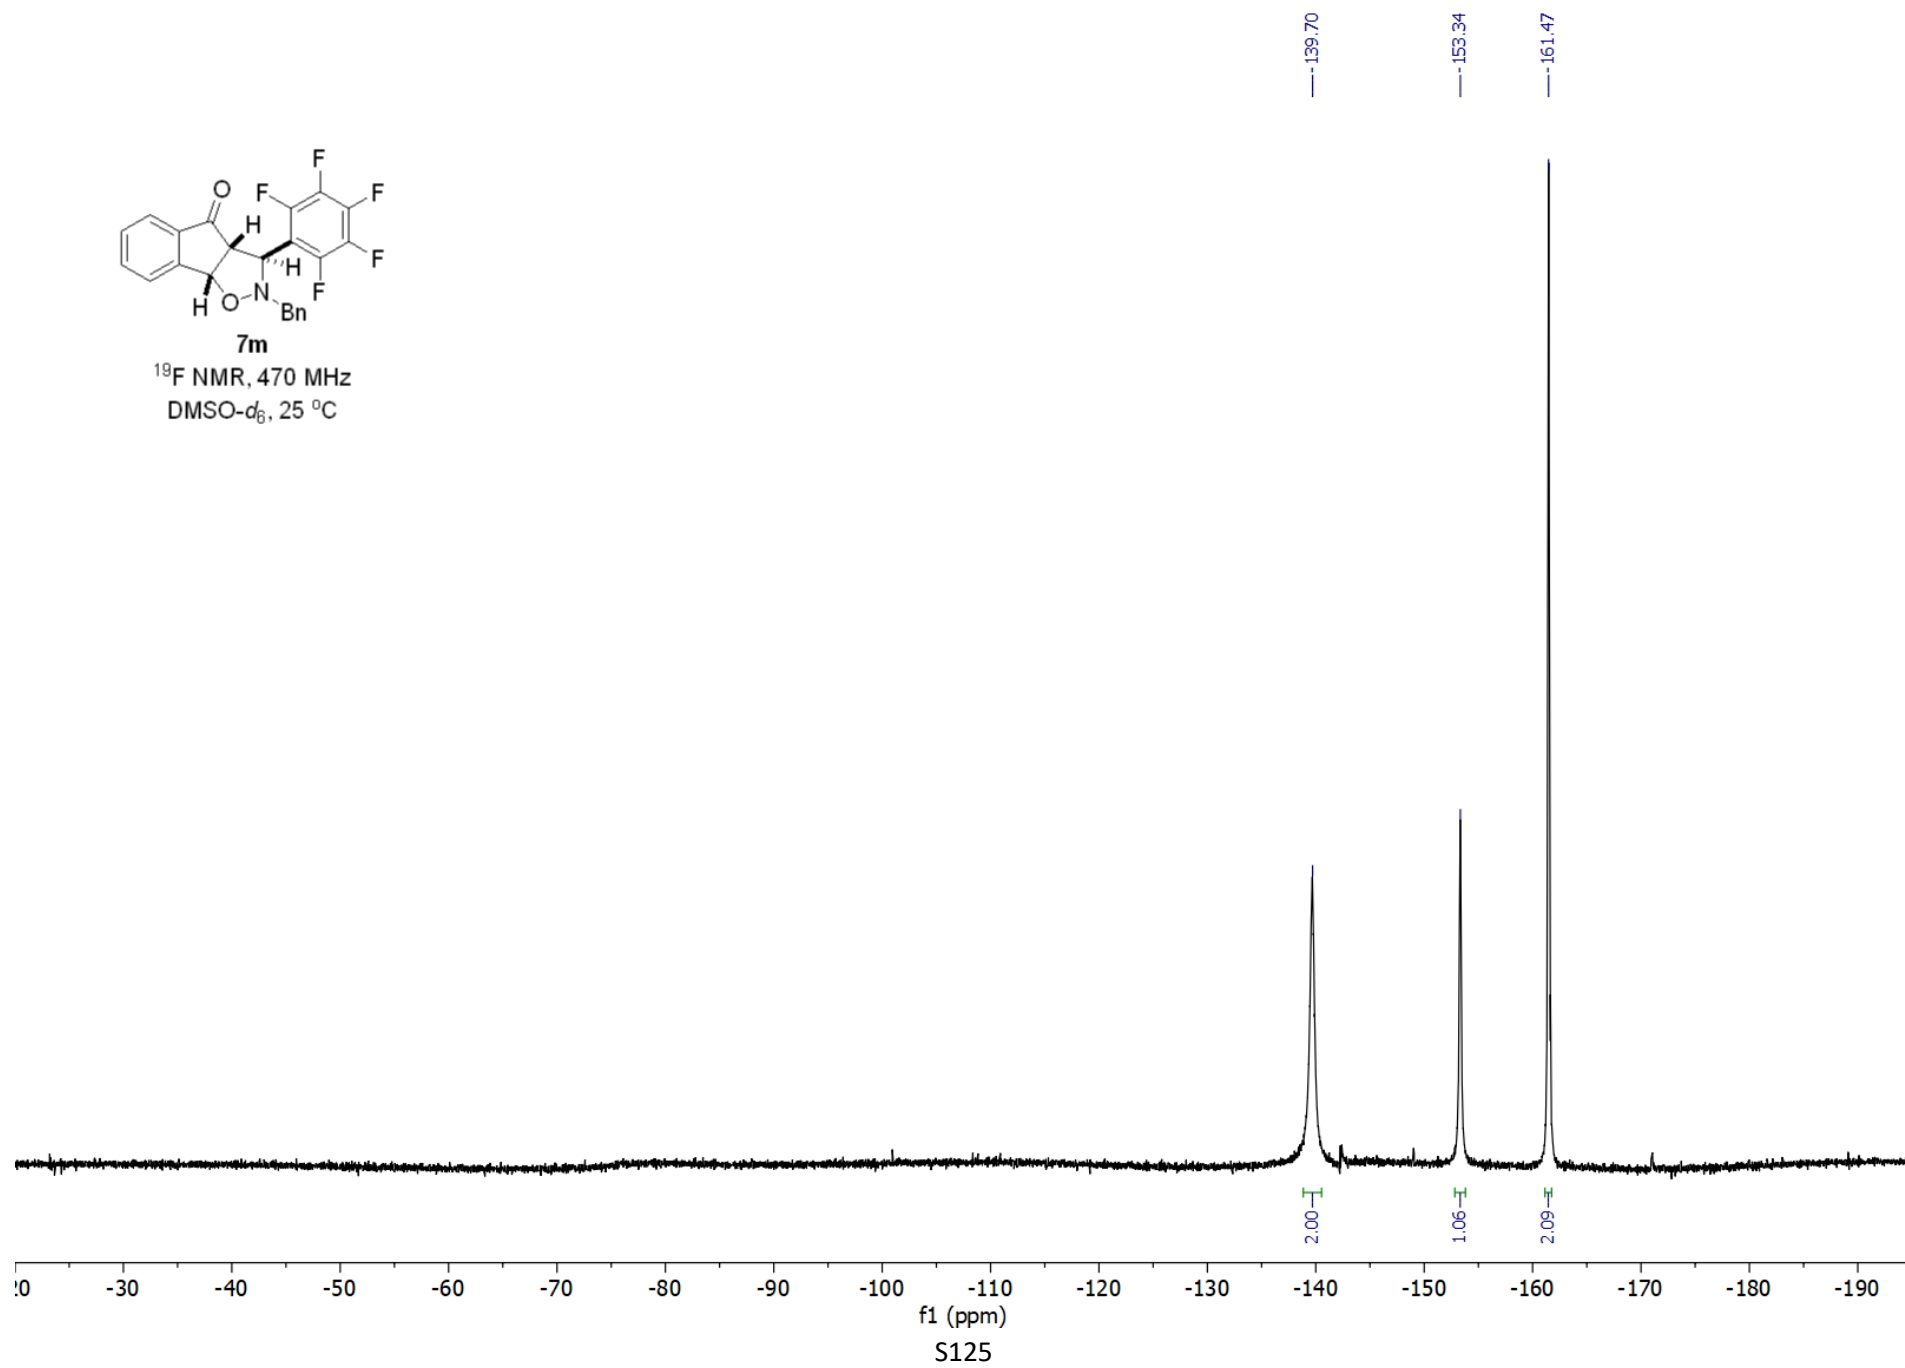

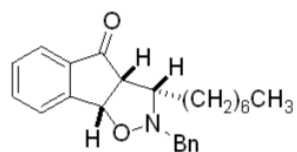

**6n**

$^1\text{H}$  NMR, 500 MHz  
DMSO- $d_6$ , 25 °C

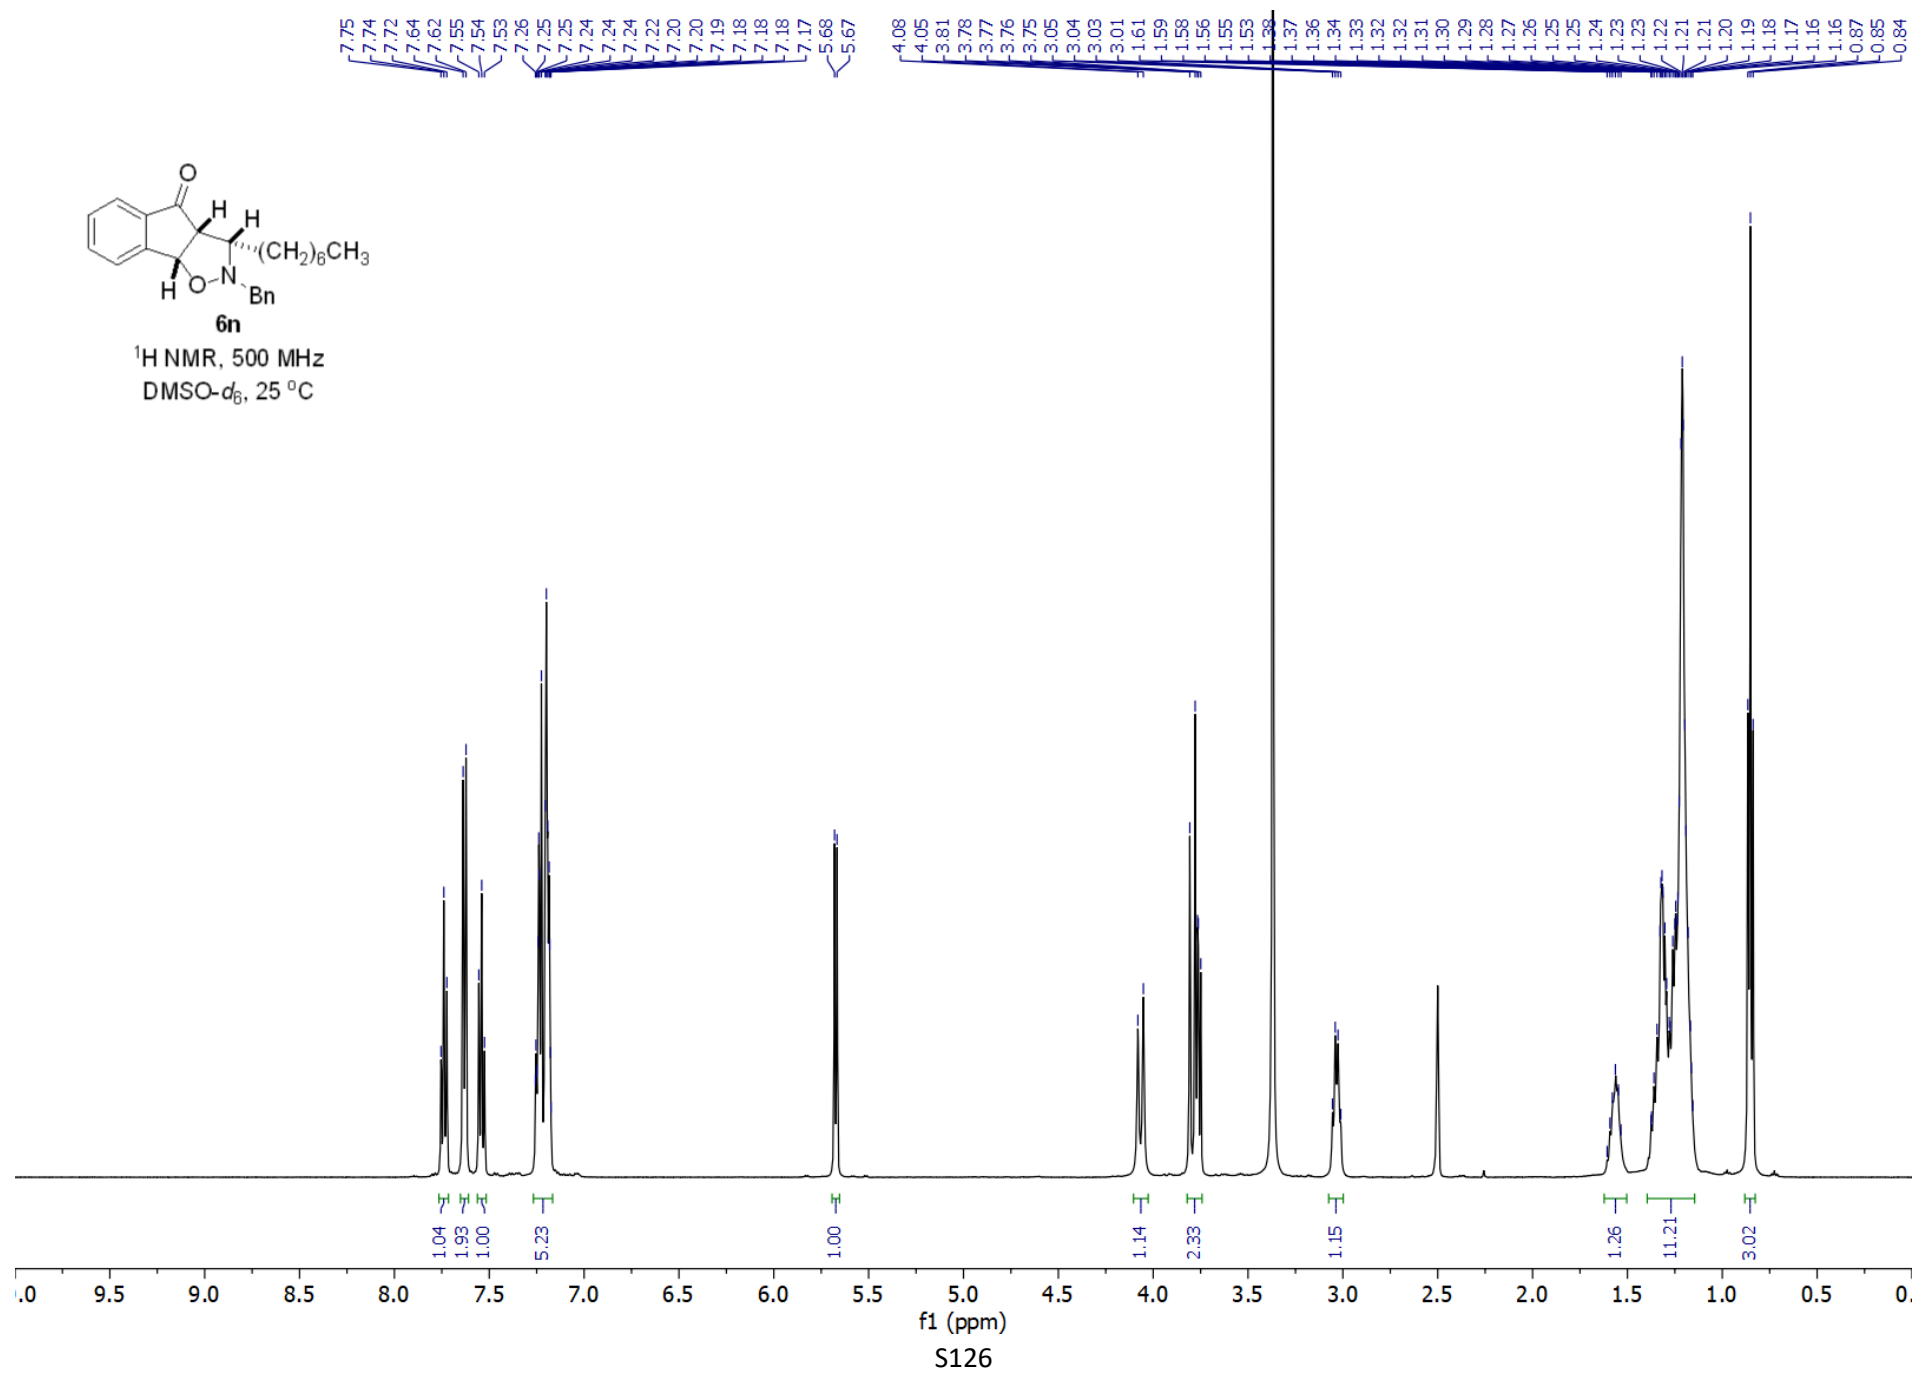

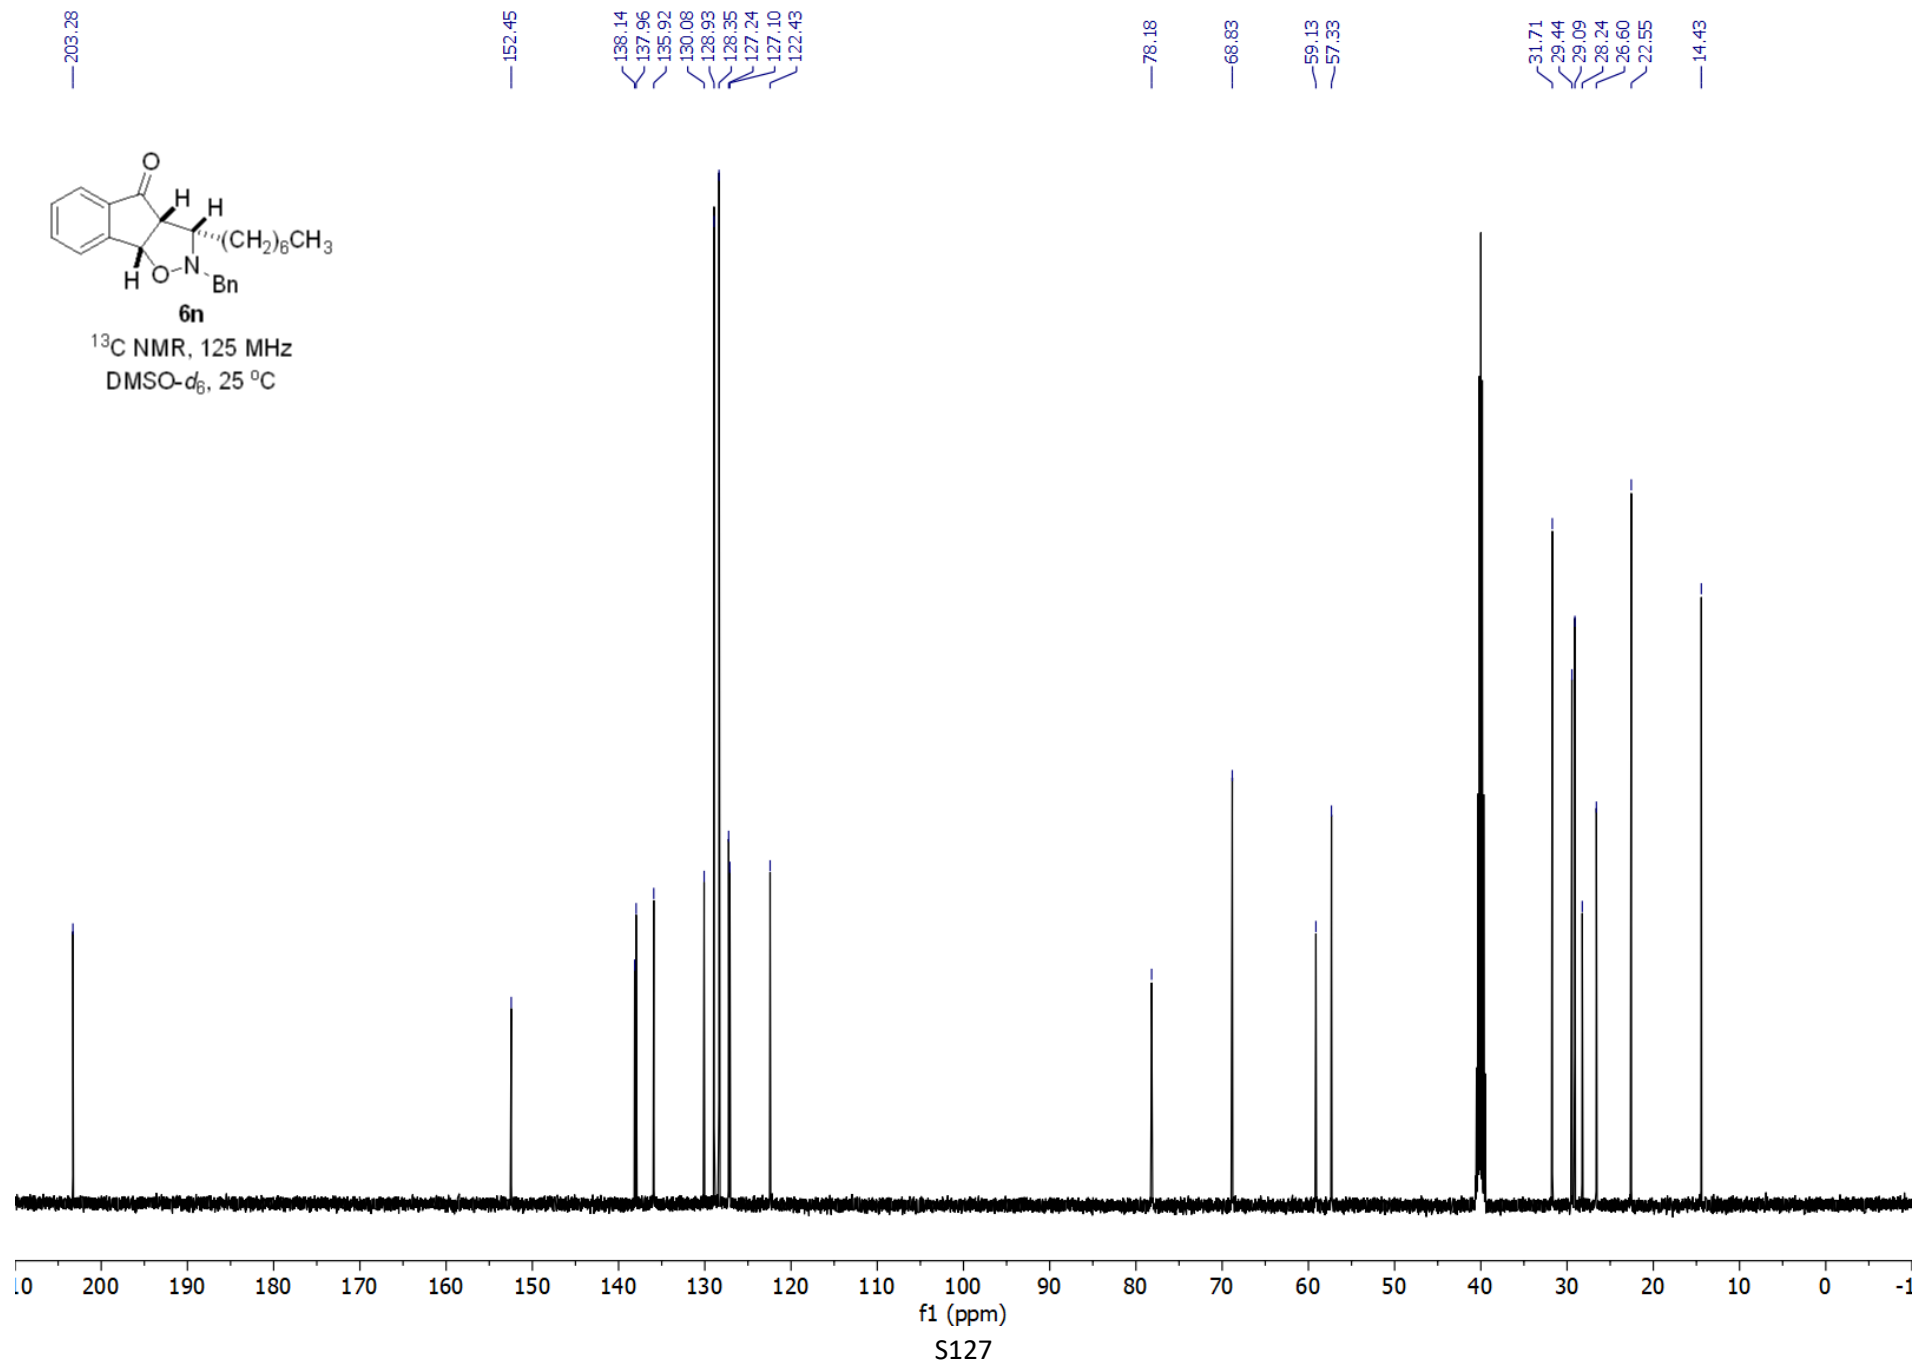

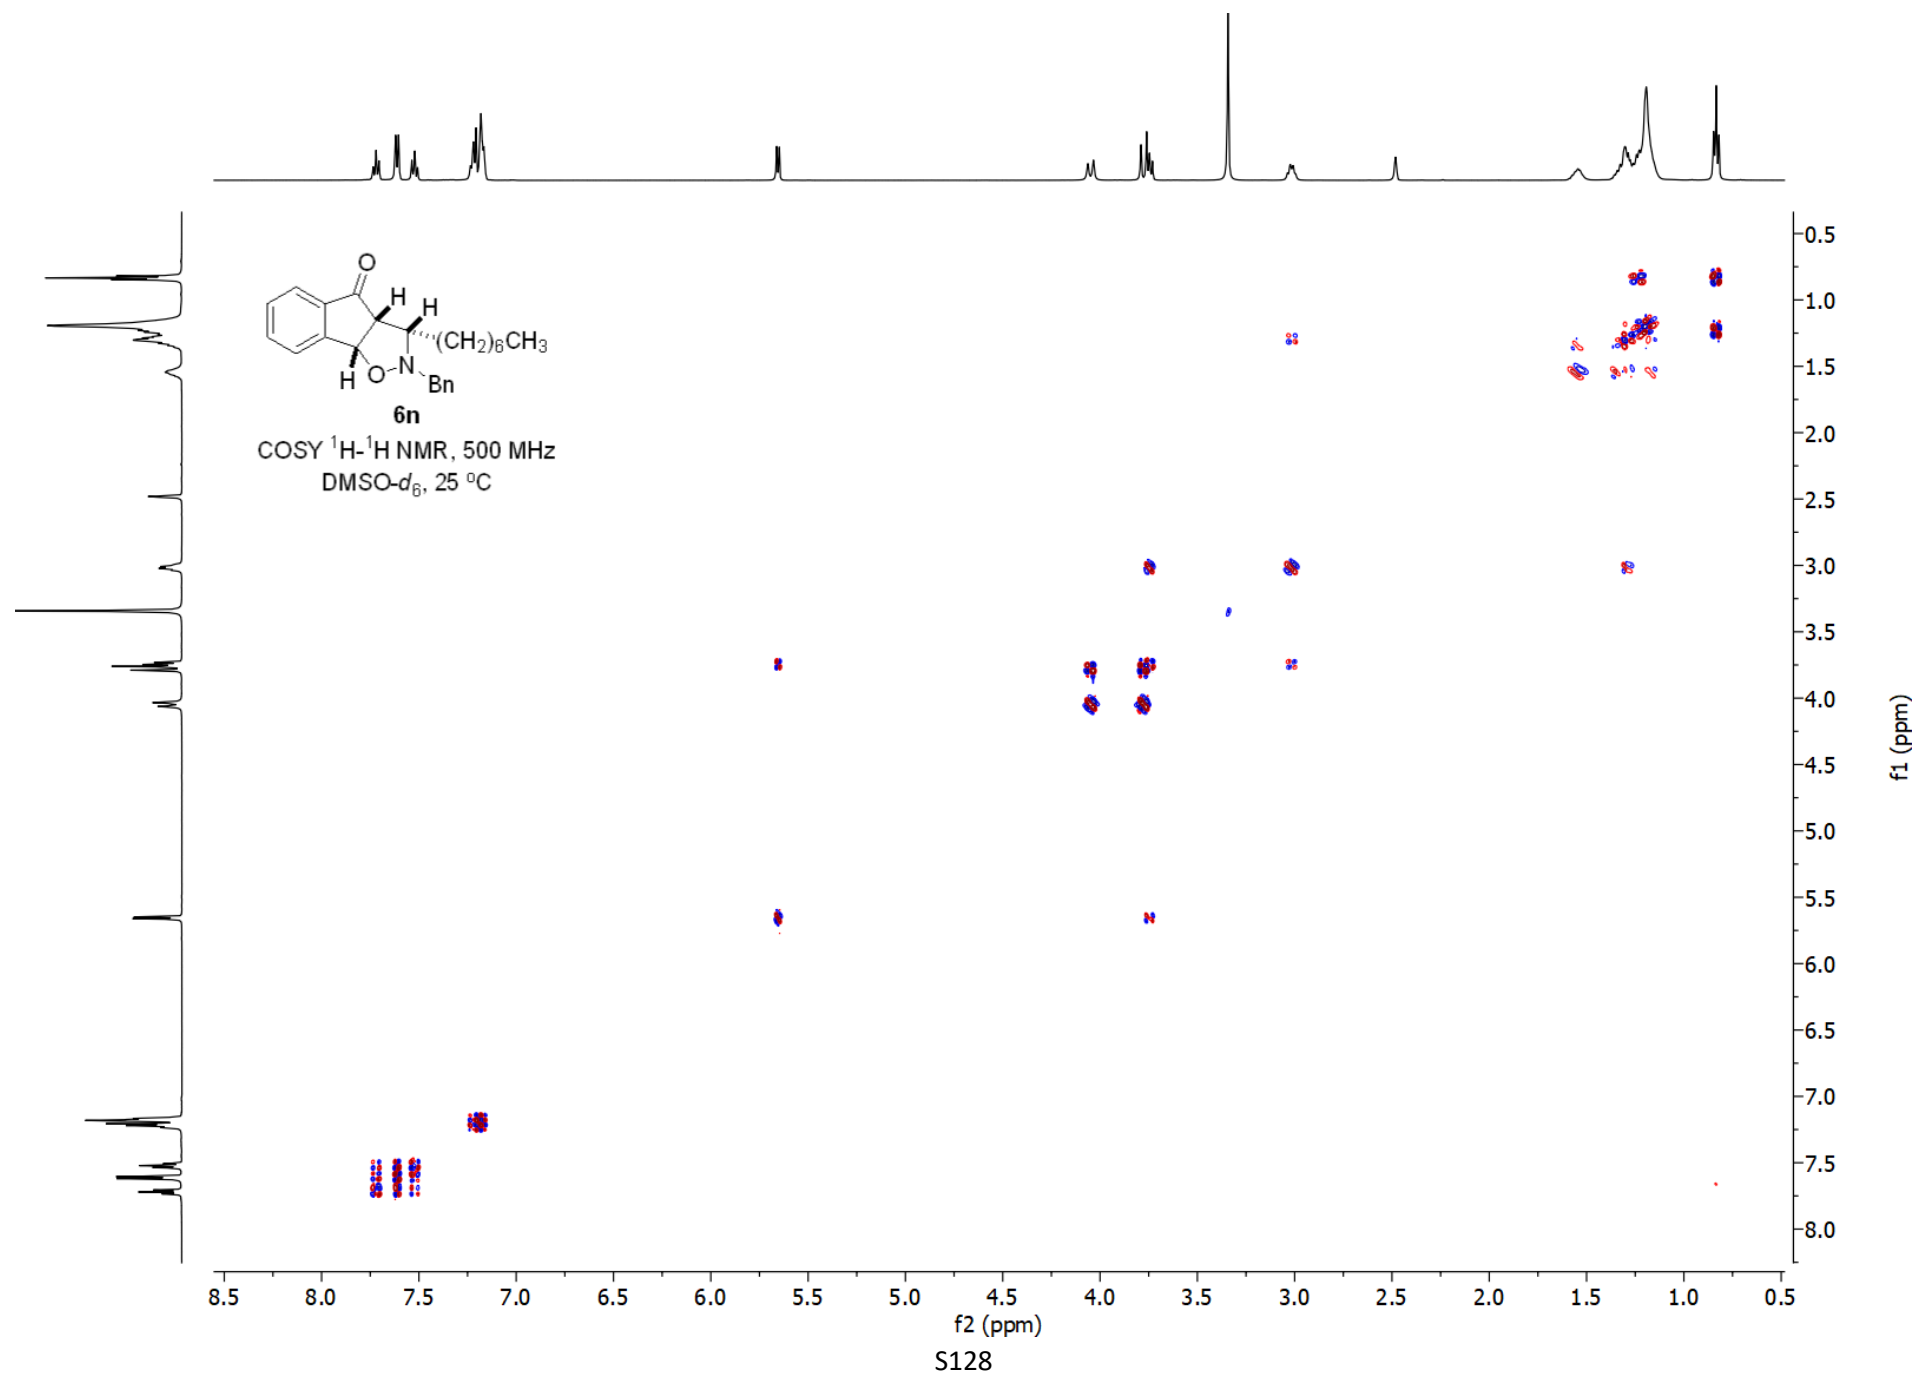

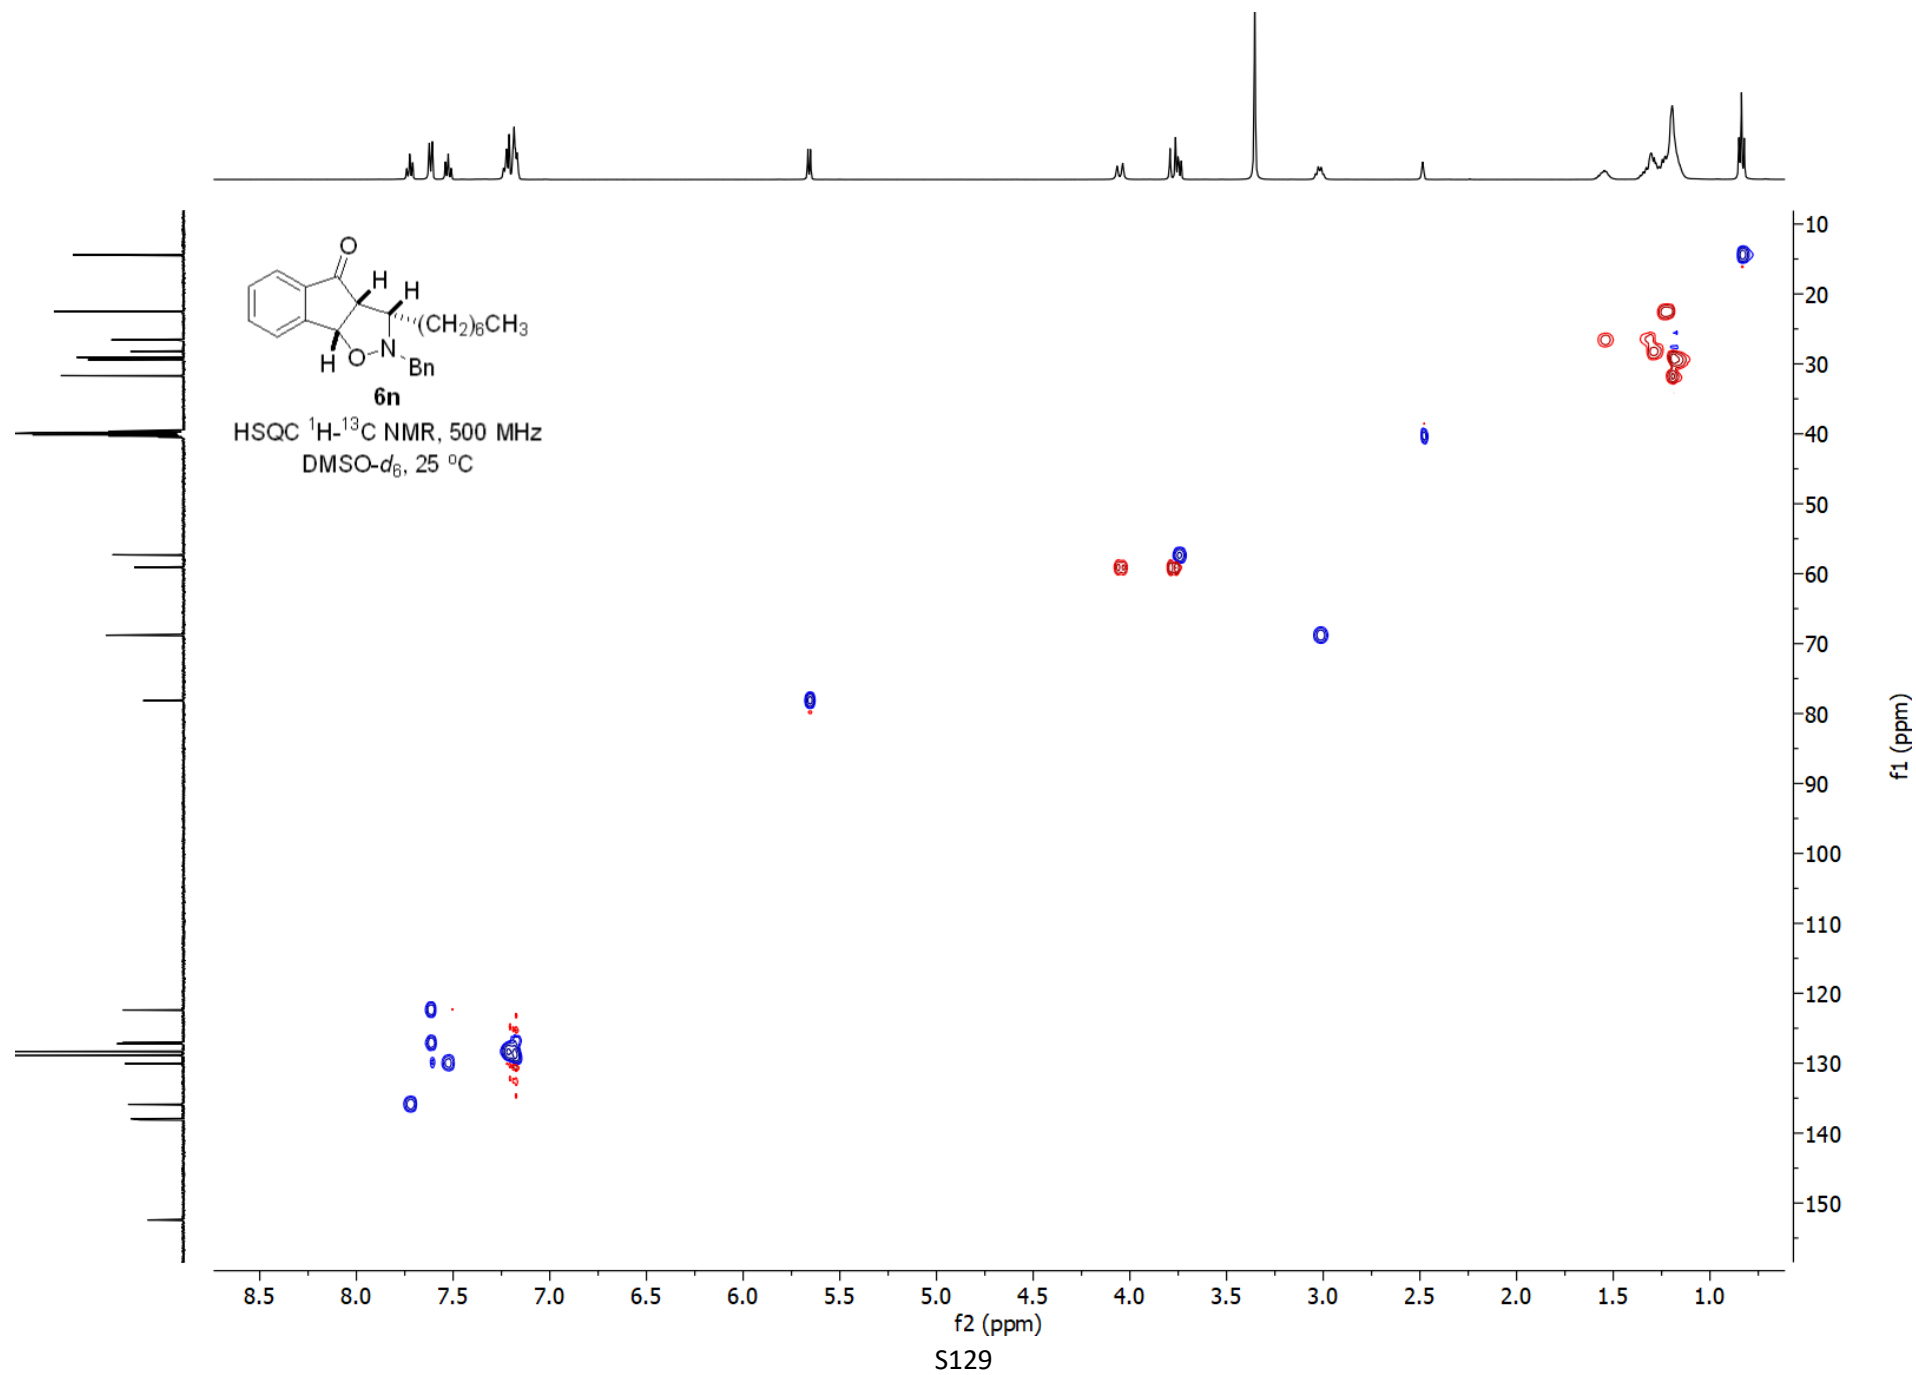

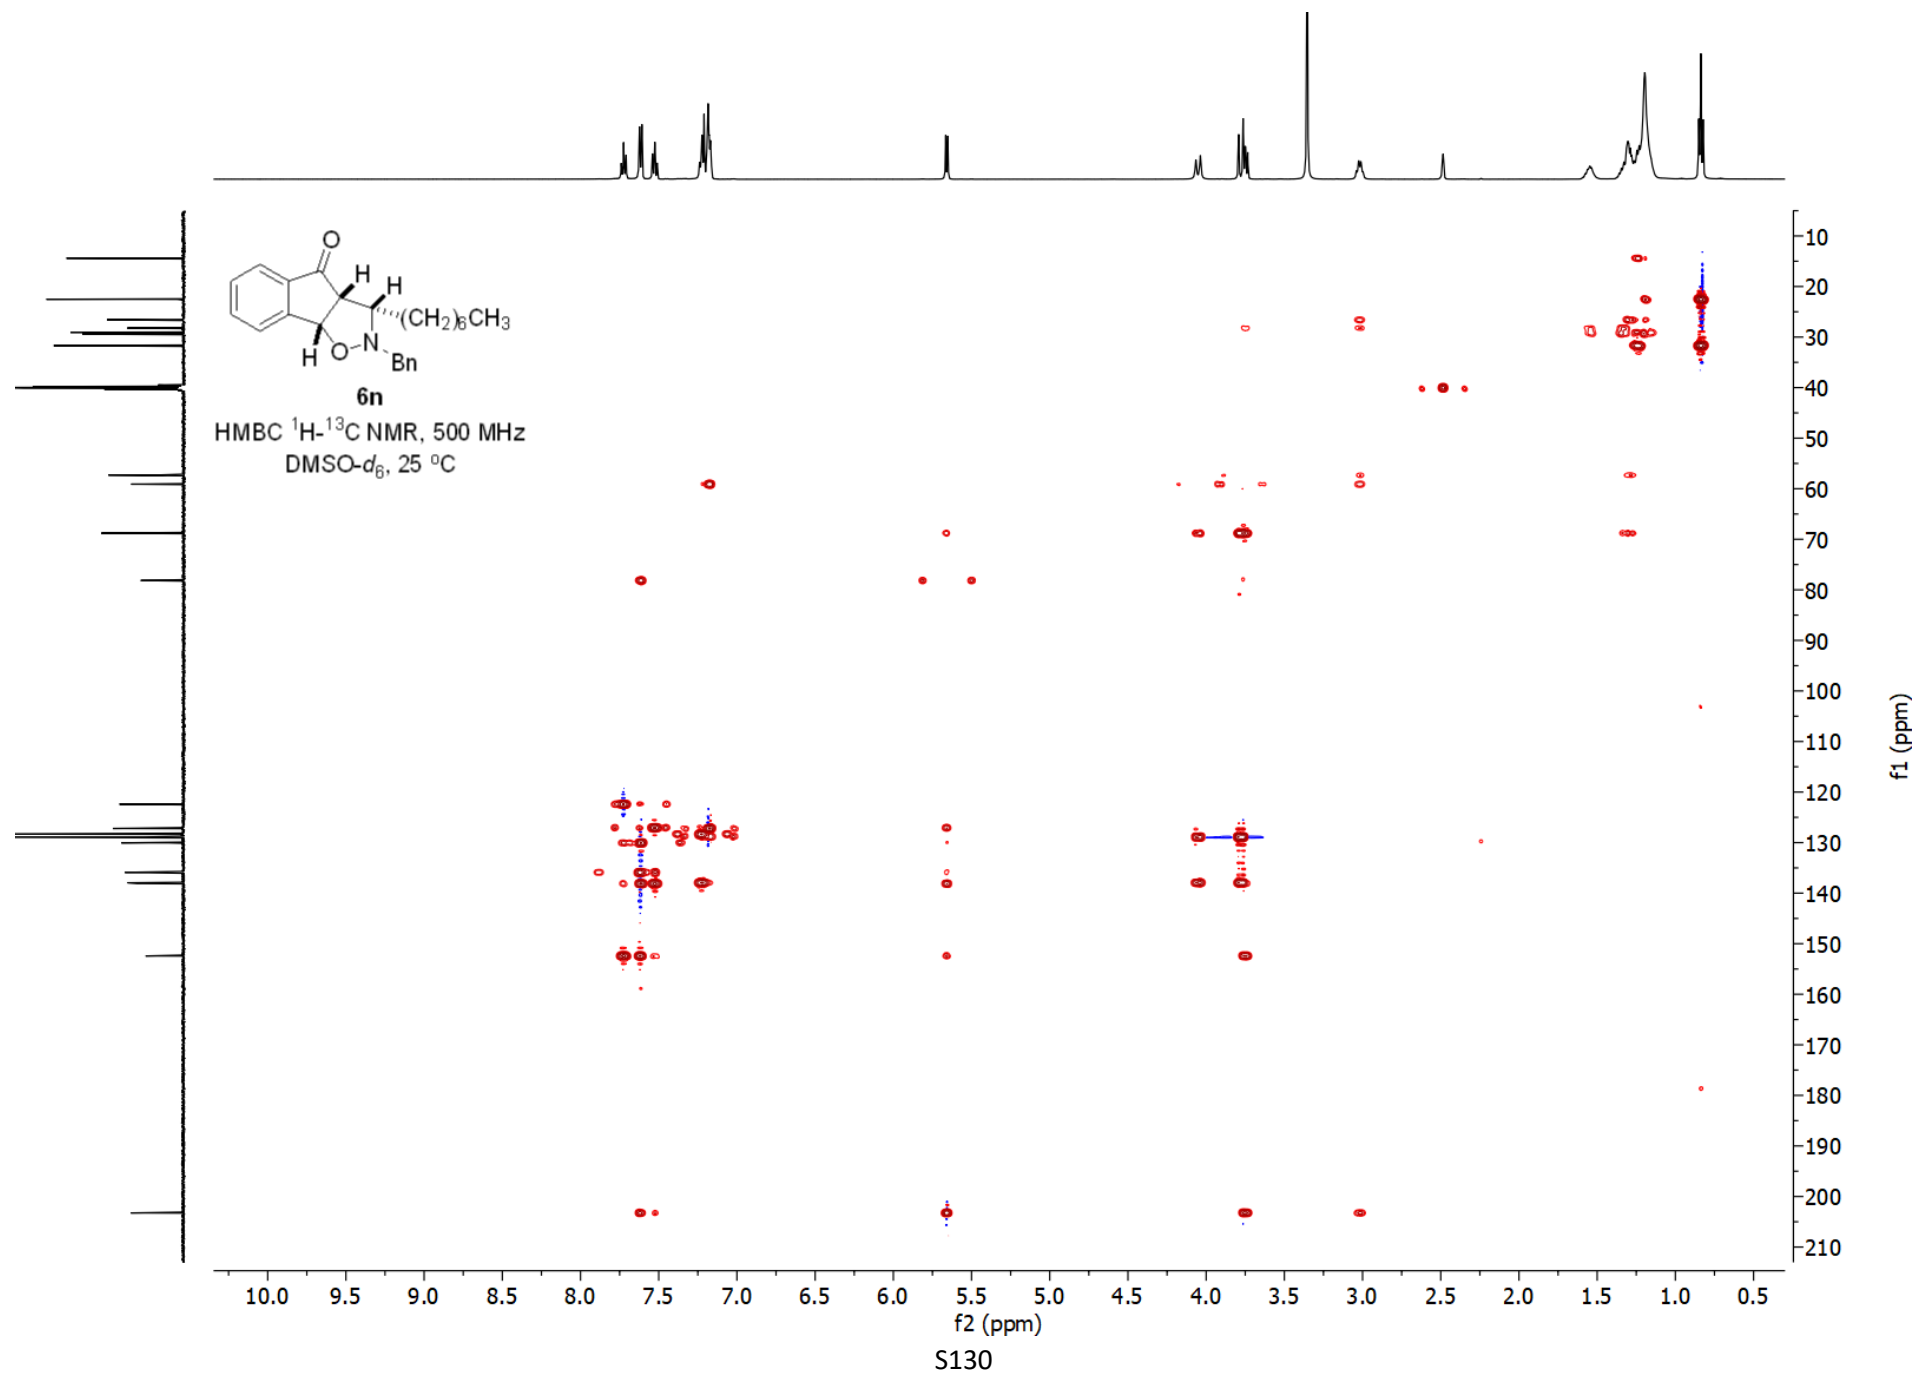

7.76  
7.74  
7.73  
7.70  
7.68  
7.67  
7.65  
7.61  
7.59  
7.58  
7.27  
7.26  
7.25  
7.24  
7.22  
7.21  
7.21  
7.20  
7.19  
7.16  
7.15  
5.61  
5.59  
3.83  
3.81  
3.66  
3.63  
3.54  
3.53  
3.52  
3.52  
3.11  
3.10  
3.09  
3.08  
1.71  
1.70  
1.69  
1.69  
1.68  
1.67  
1.67  
1.66  
1.65  
1.62  
1.61  
1.60  
1.59  
1.59  
1.58  
1.57  
1.56  
1.56  
1.55  
1.52  
1.51  
1.50  
1.49  
1.49  
1.47  
1.46  
1.45  
1.44  
1.43  
1.43  
1.42  
1.41  
1.33  
1.32  
1.30  
1.30  
1.29  
1.28  
1.27  
1.26  
1.25  
1.24  
1.23  
0.90  
0.88  
0.87

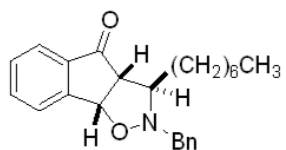

**7n**

$^1\text{H}$  NMR, 500 MHz  
DMSO- $d_6$ , 60  $^\circ\text{C}$

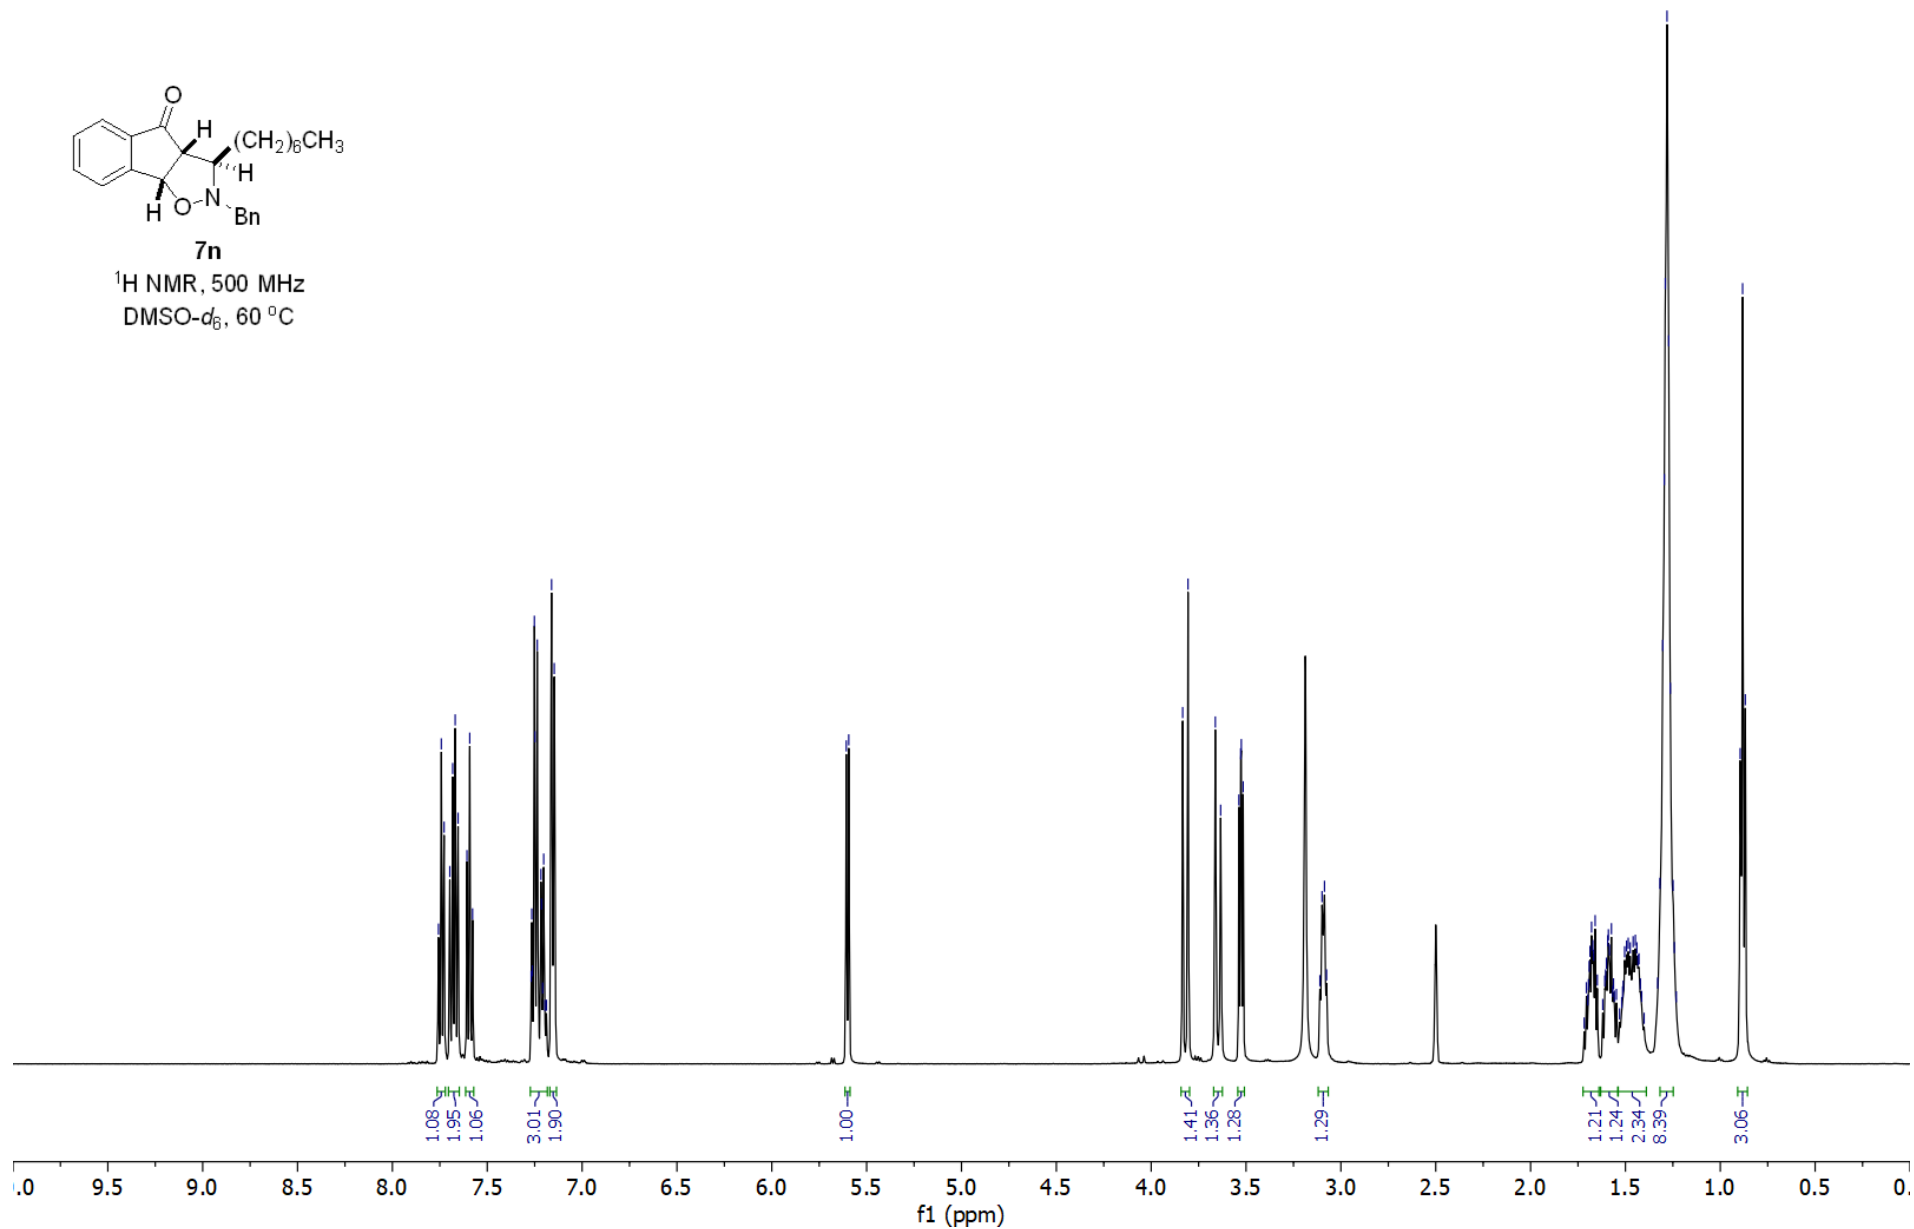

204.14

151.63

137.98

136.37

135.67

130.32

128.66

128.09

127.47

127.00

123.47

79.03

68.43

61.25

60.00

32.03

31.39

29.09

28.76

25.68

22.20

14.00

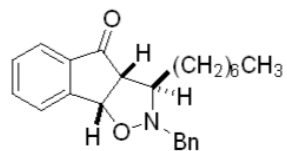

7n

$^{13}\text{C}$  NMR, 125 MHz

DMSO- $d_6$ , 60 °C

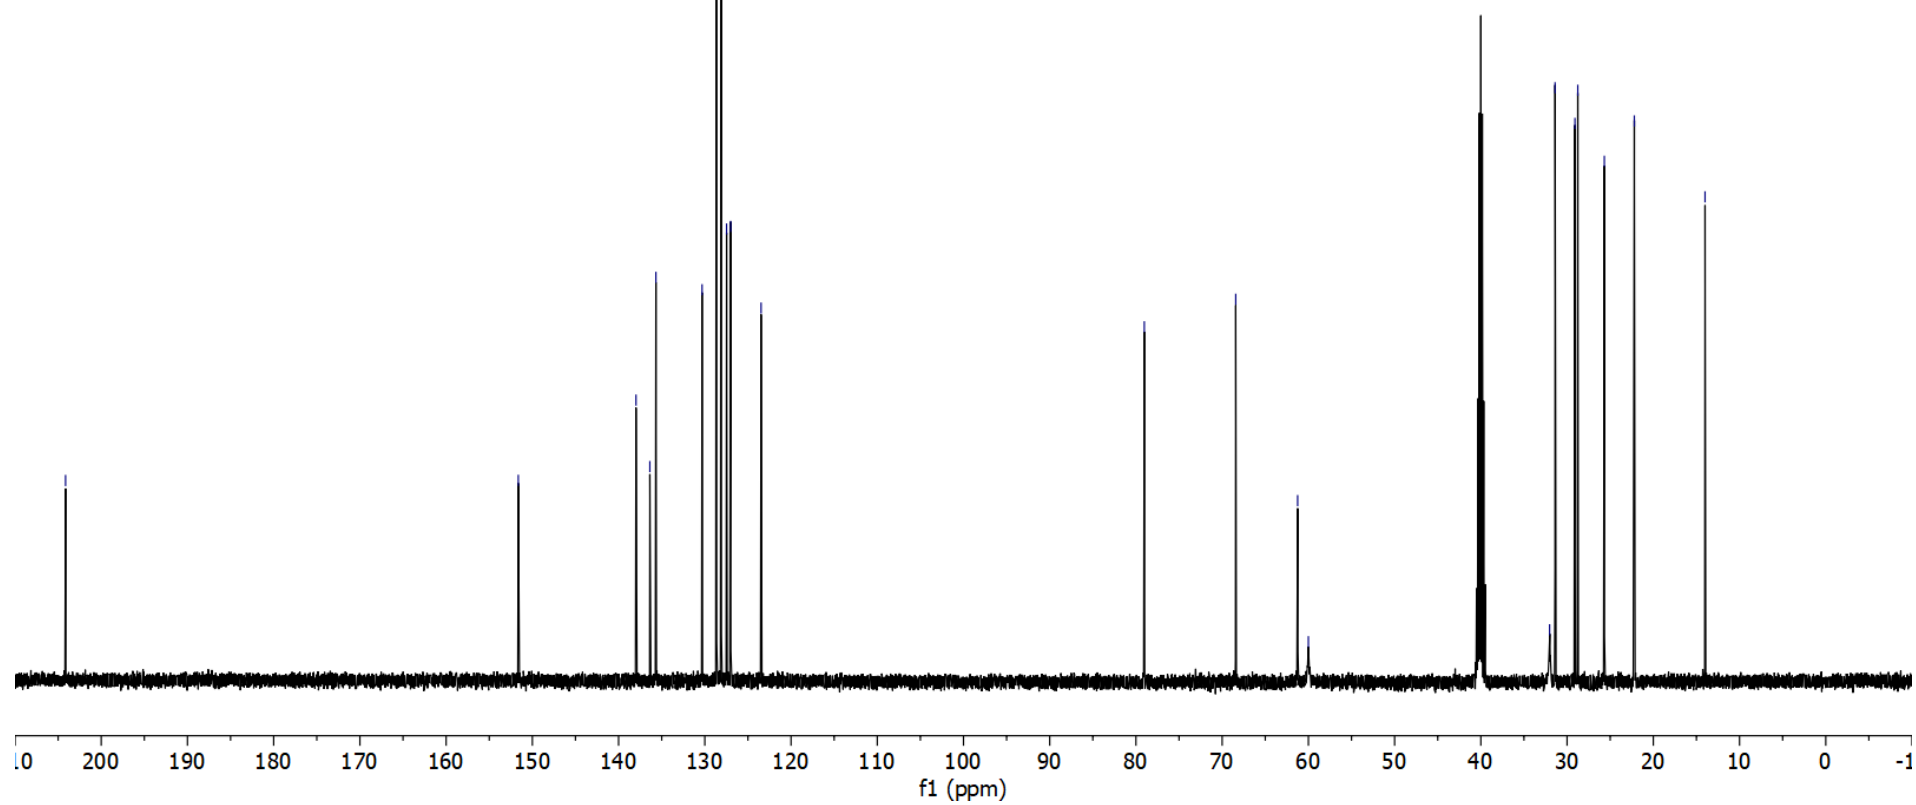

S132

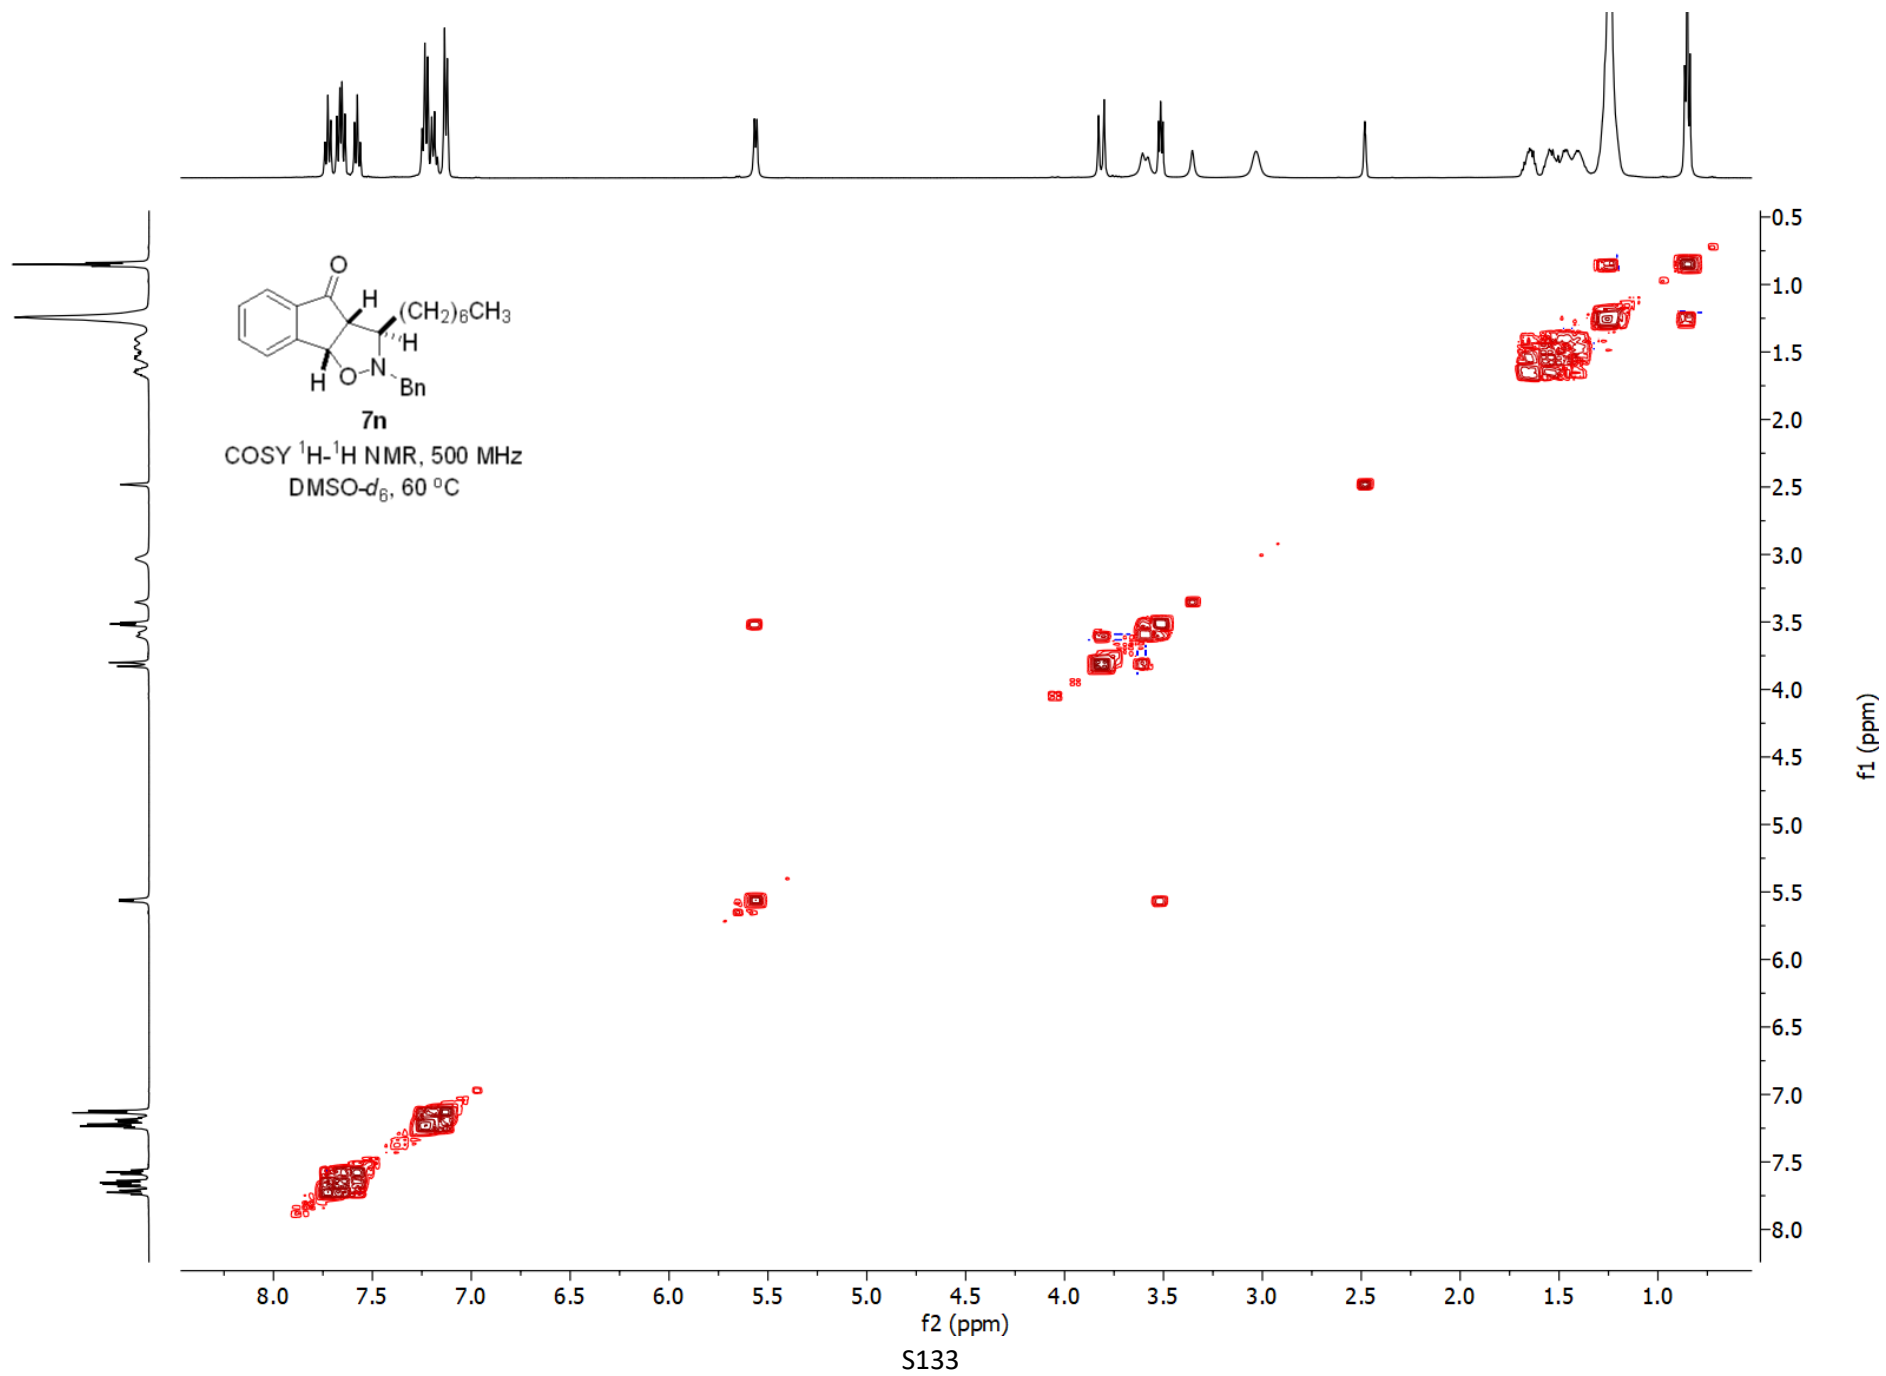

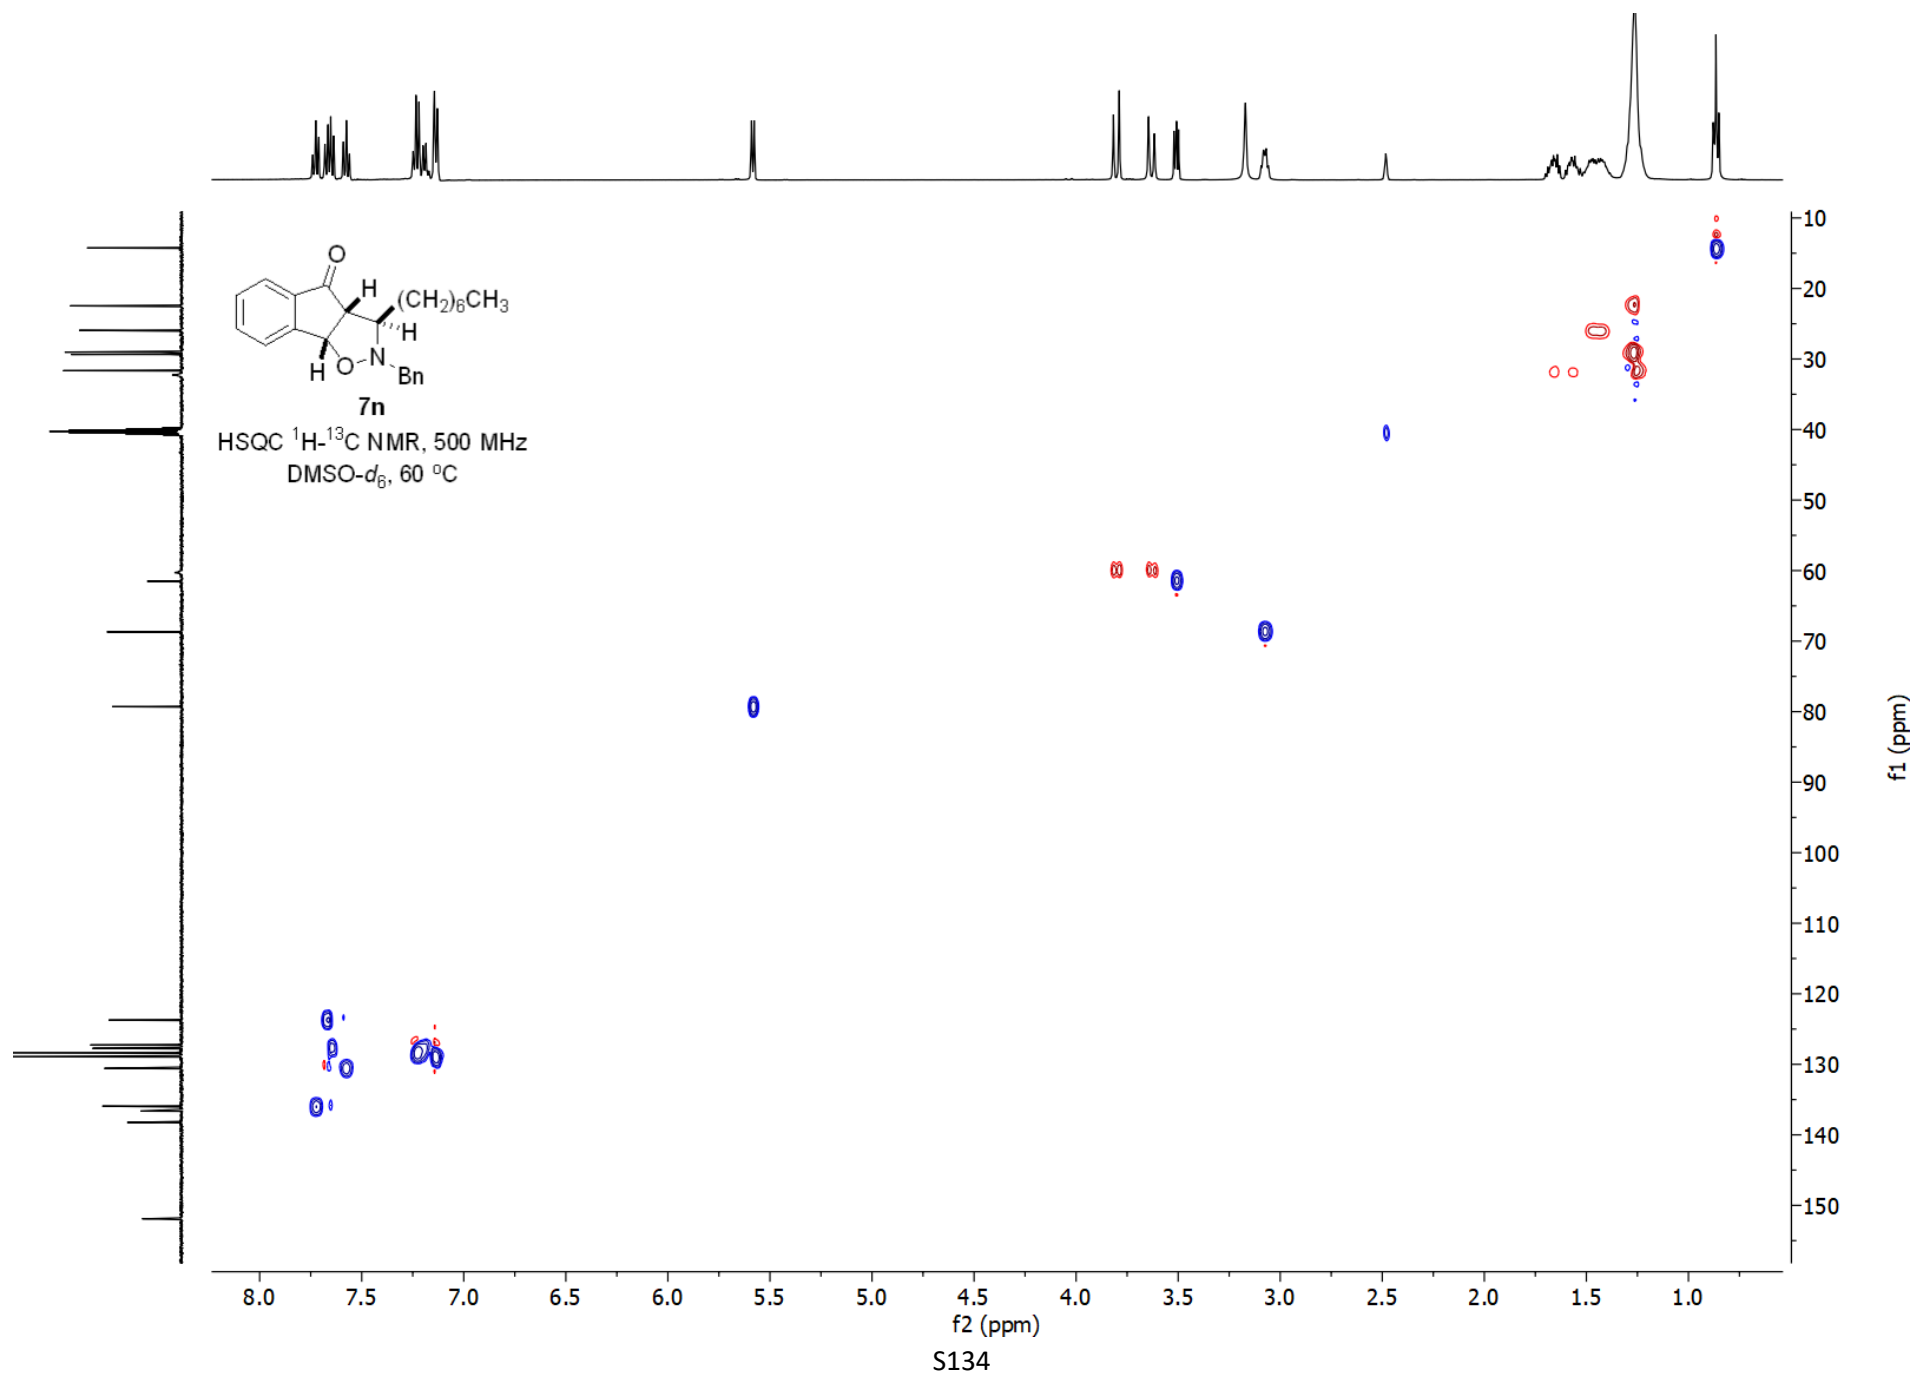

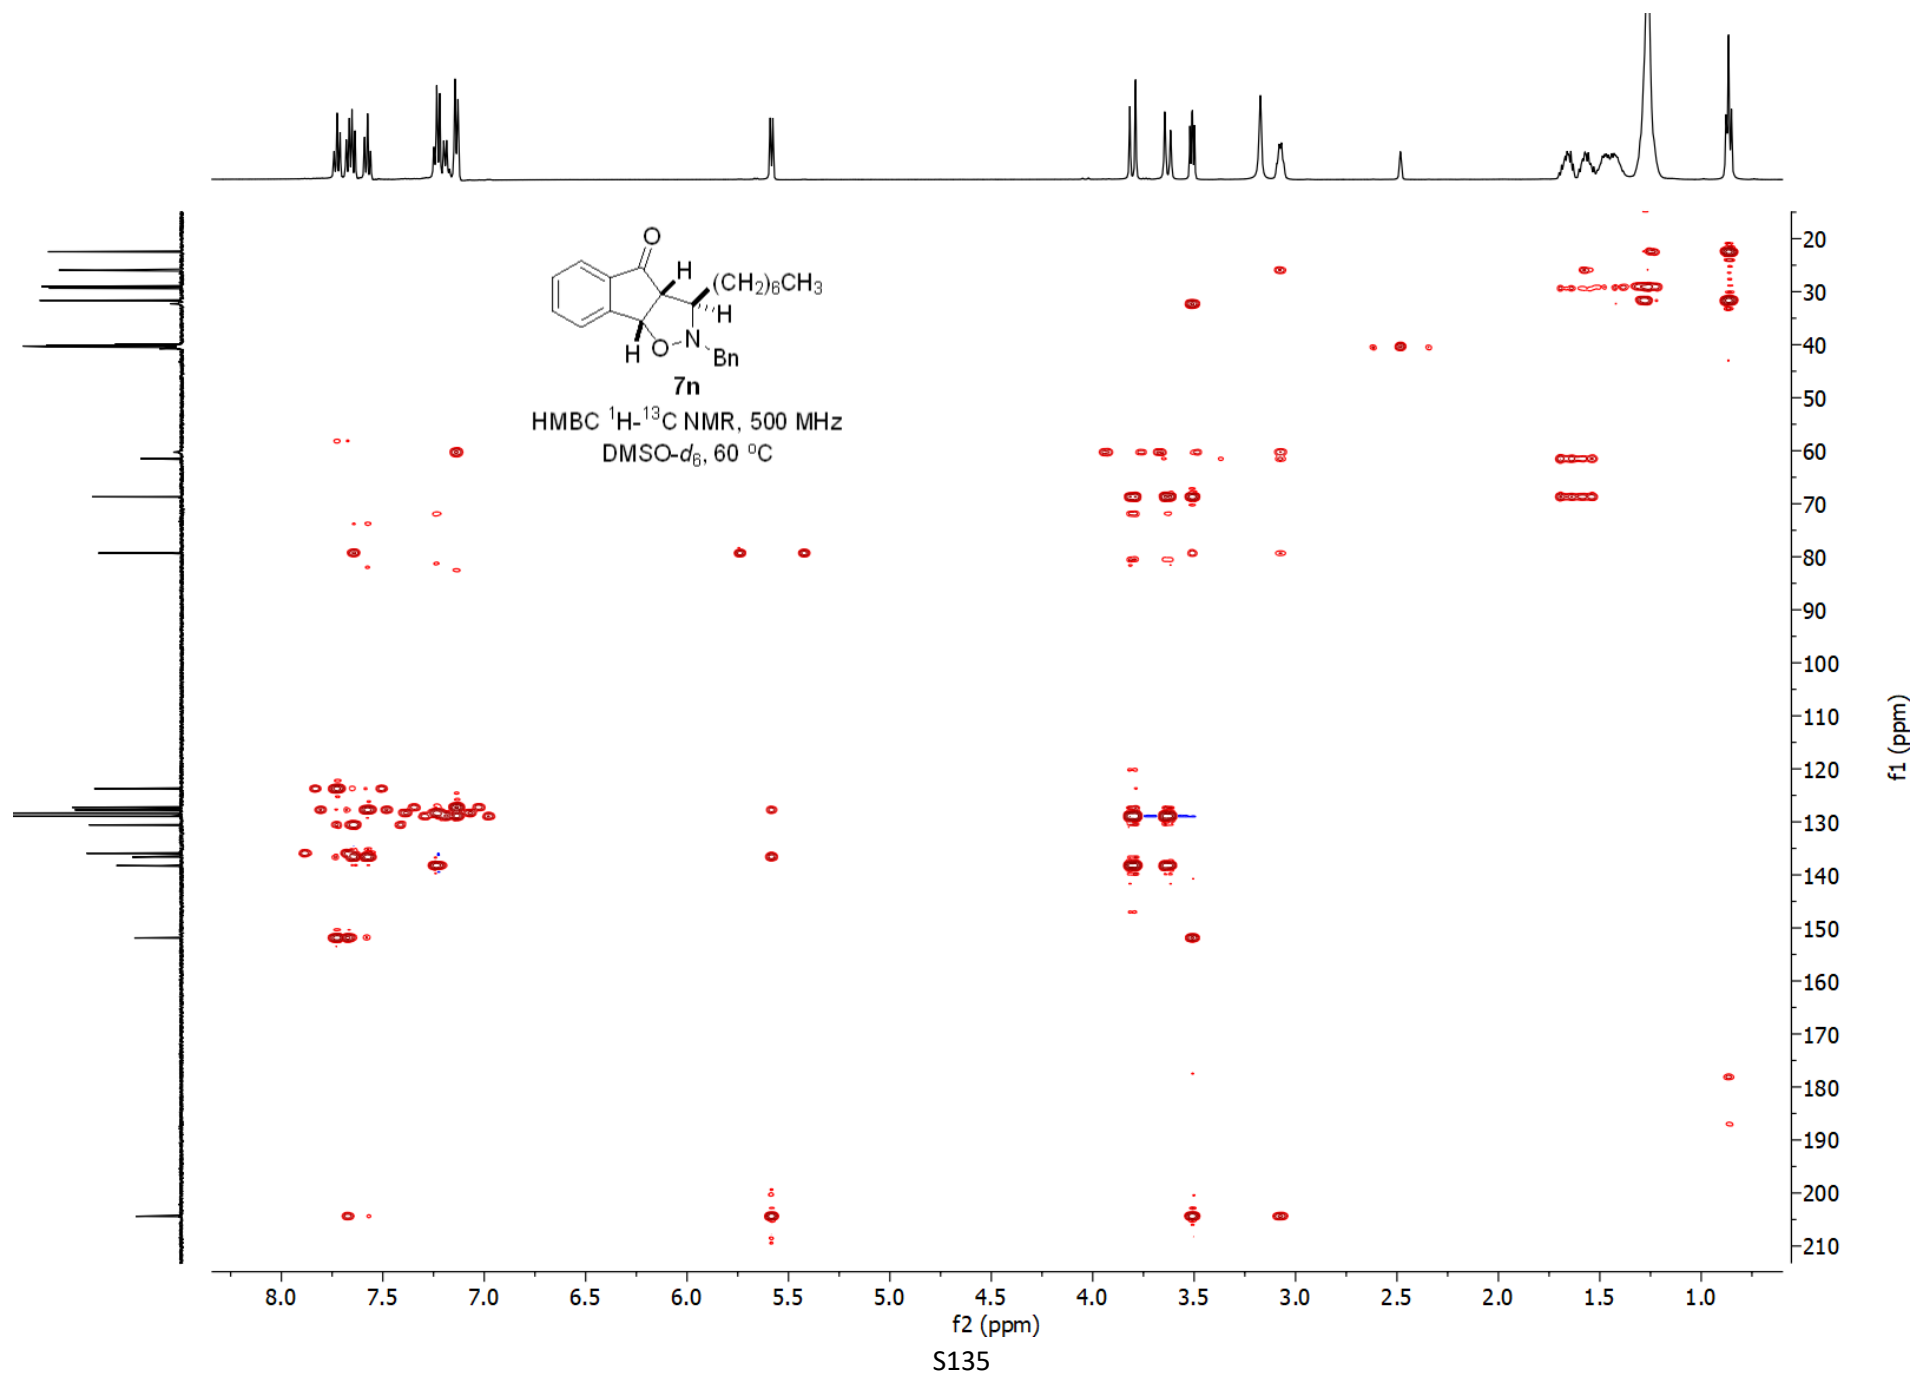

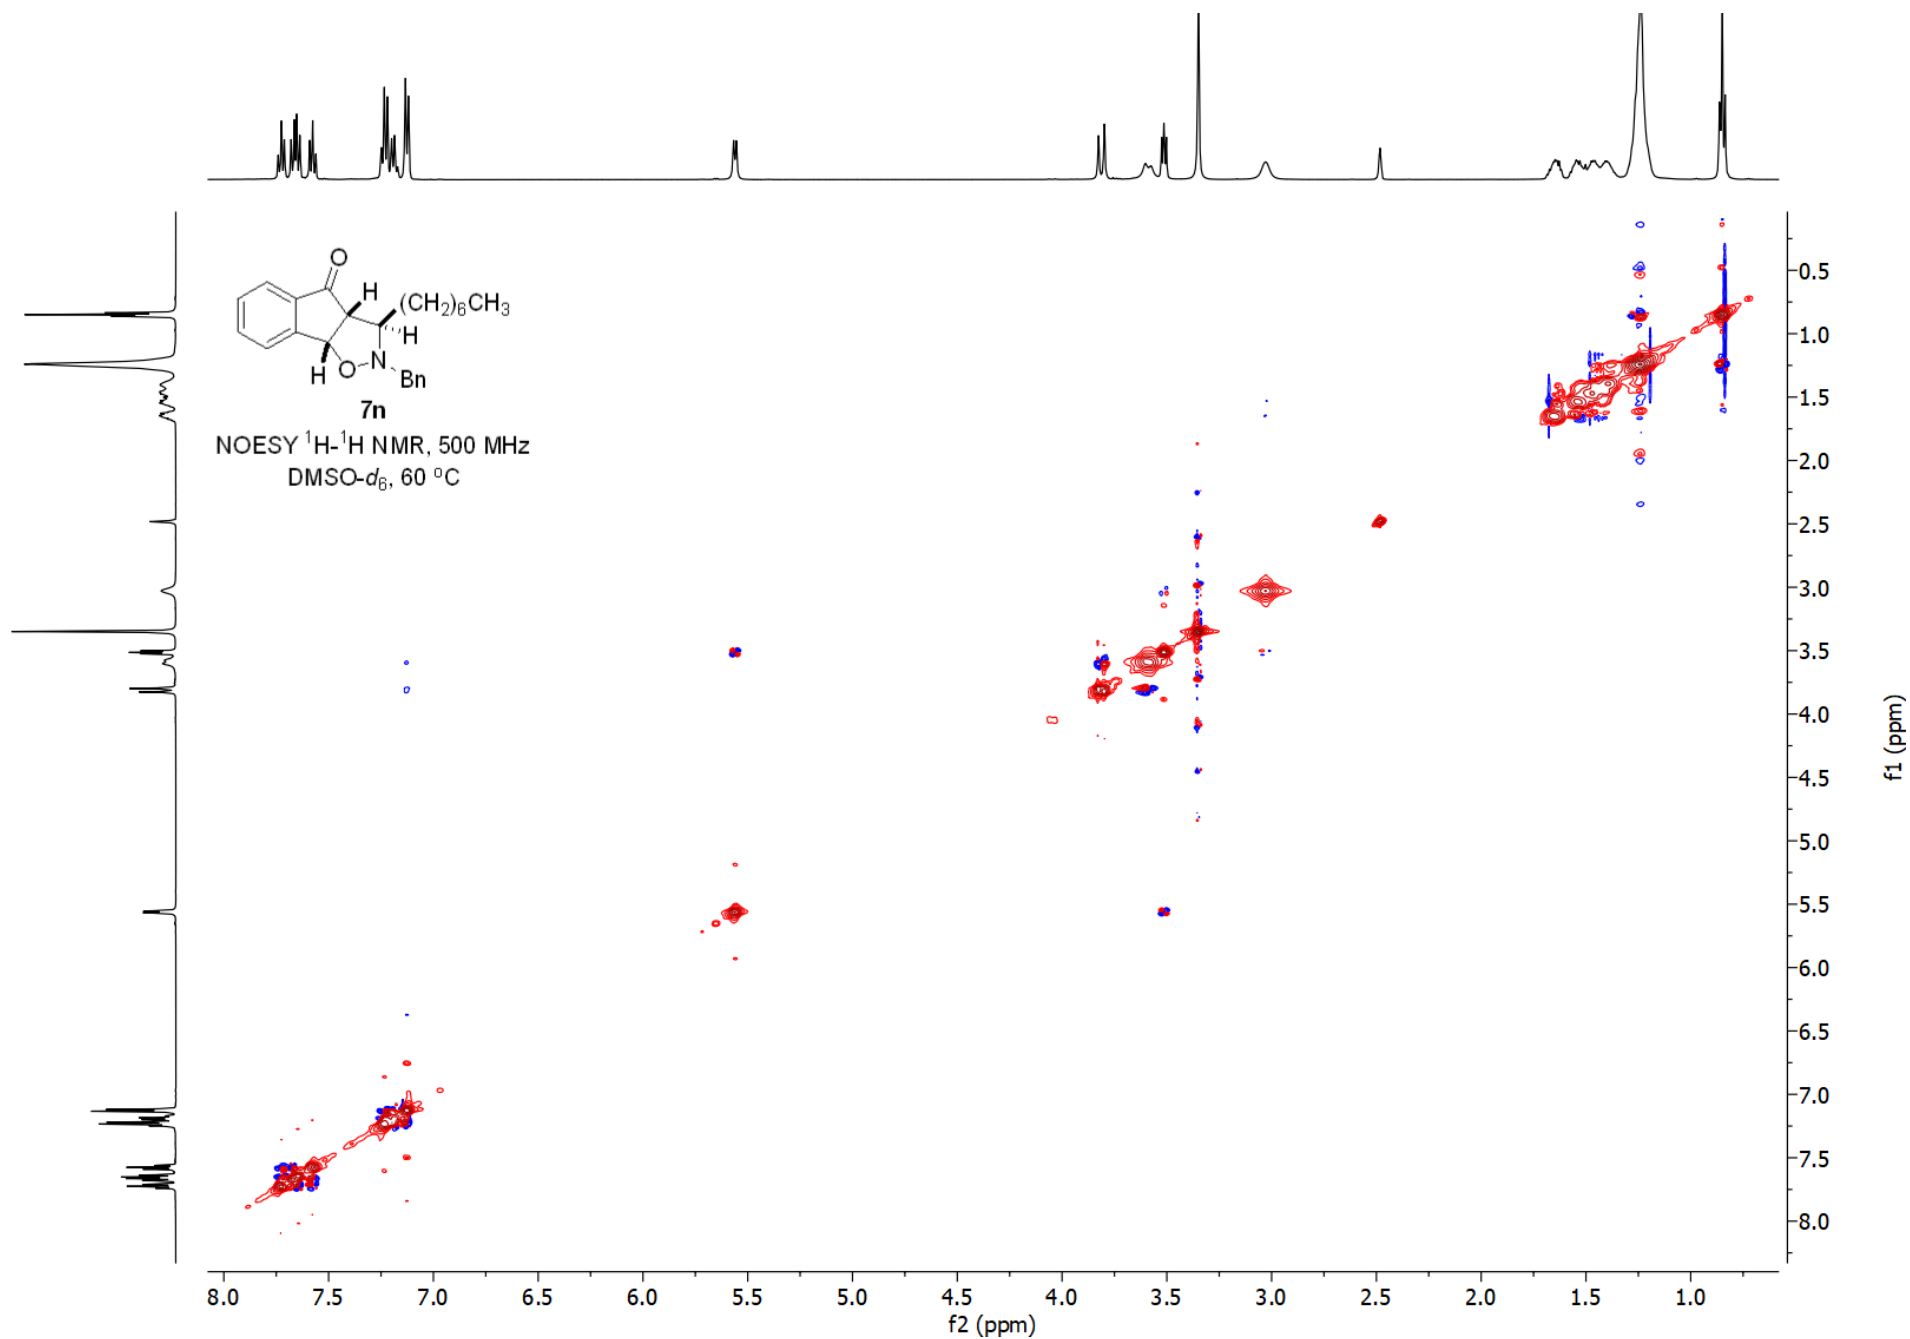

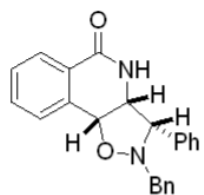

**9a**

$^1\text{H}$  NMR, 500 MHz  
DMSO- $d_6$ , 25 °C

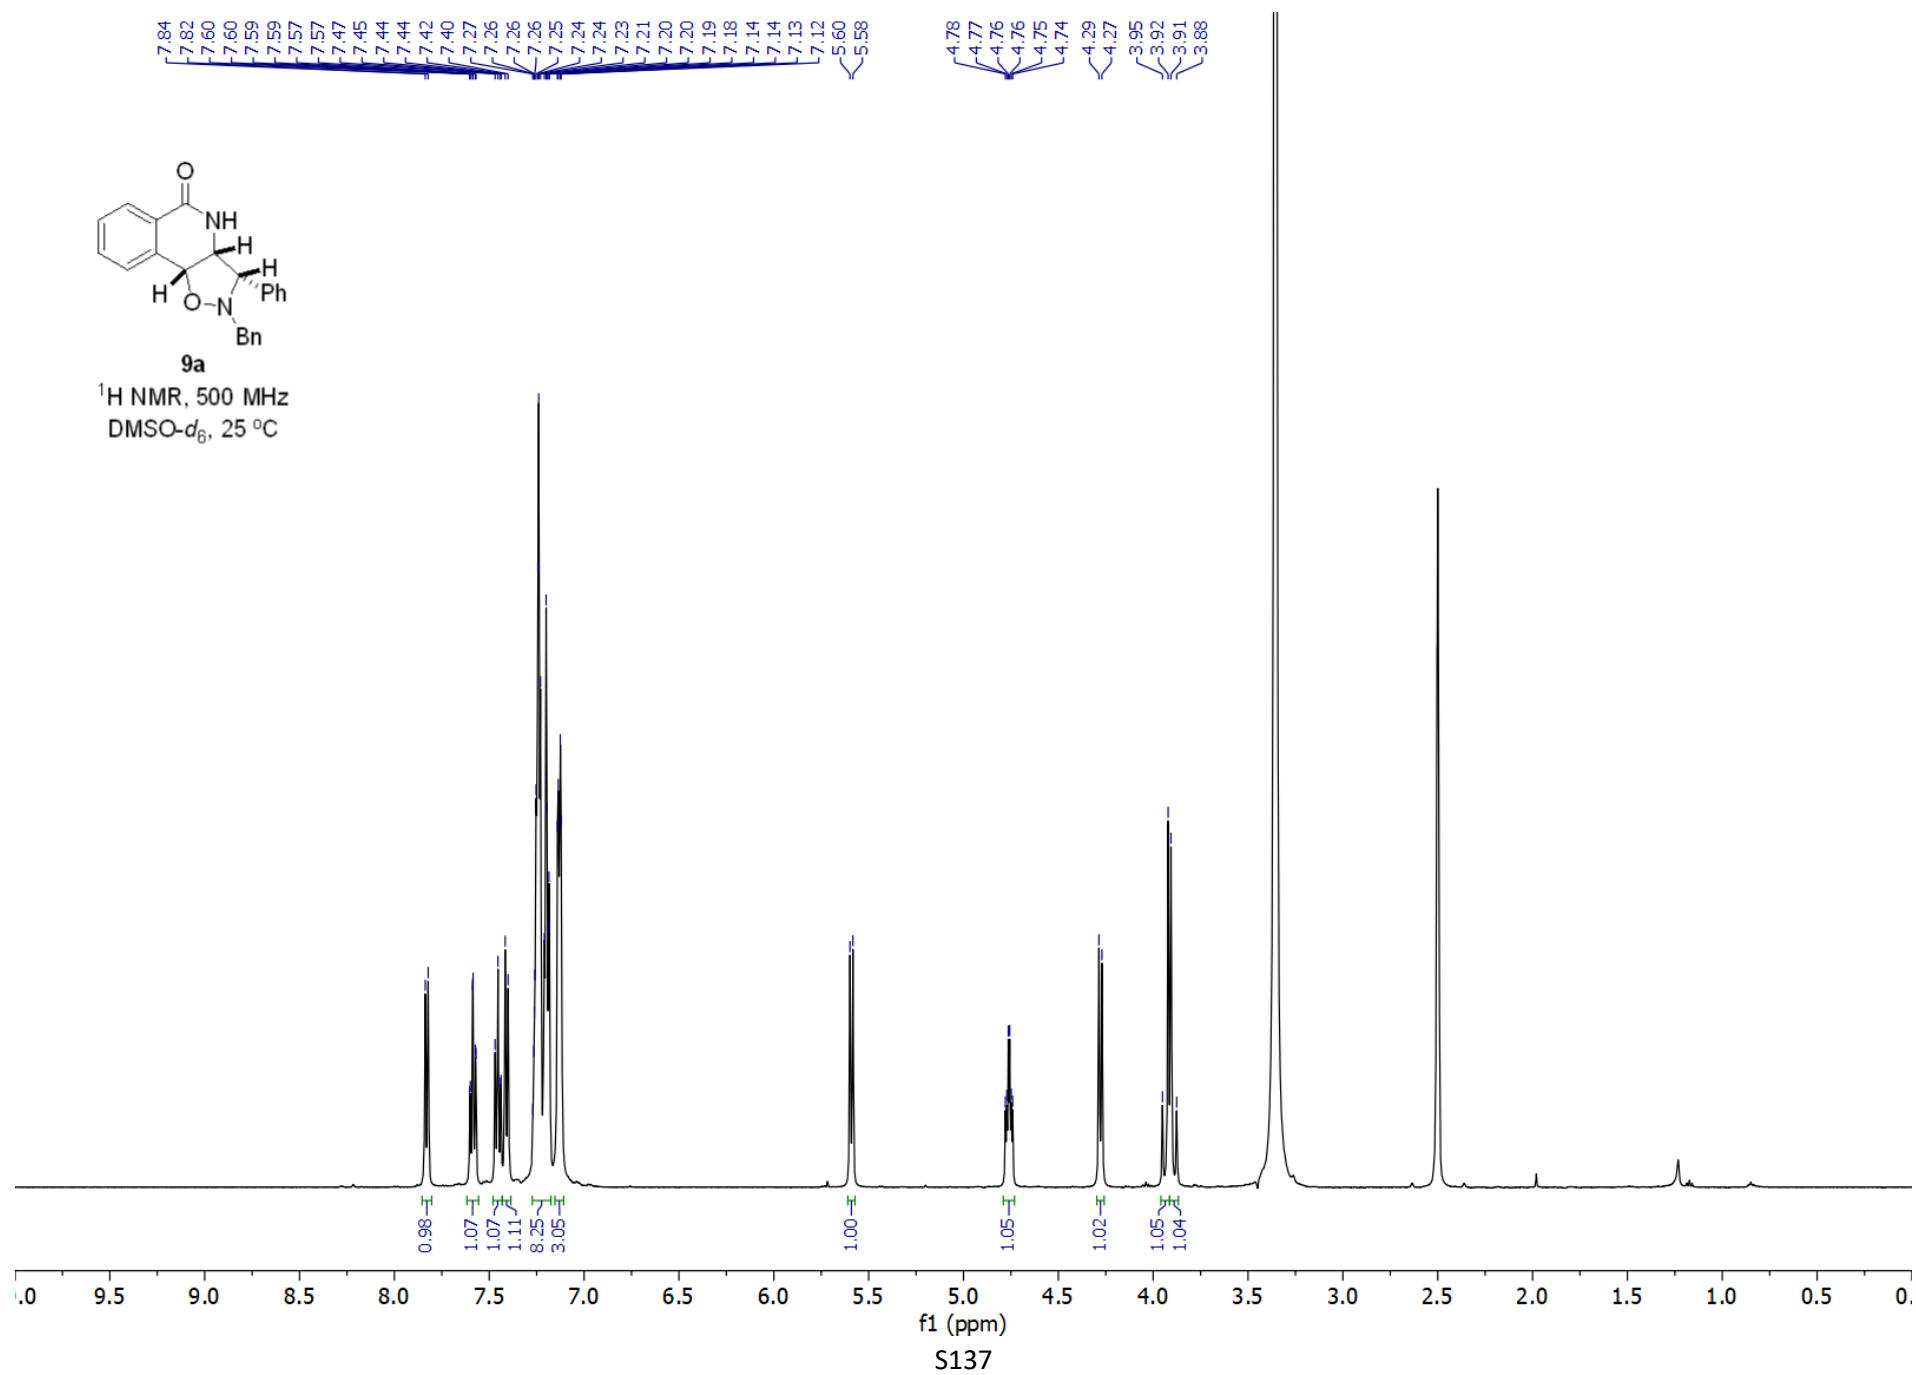

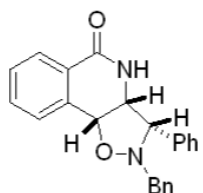

**9a**

$^{13}\text{C}$  NMR, 125 MHz  
DMSO- $d_6$ , 25  $^{\circ}\text{C}$

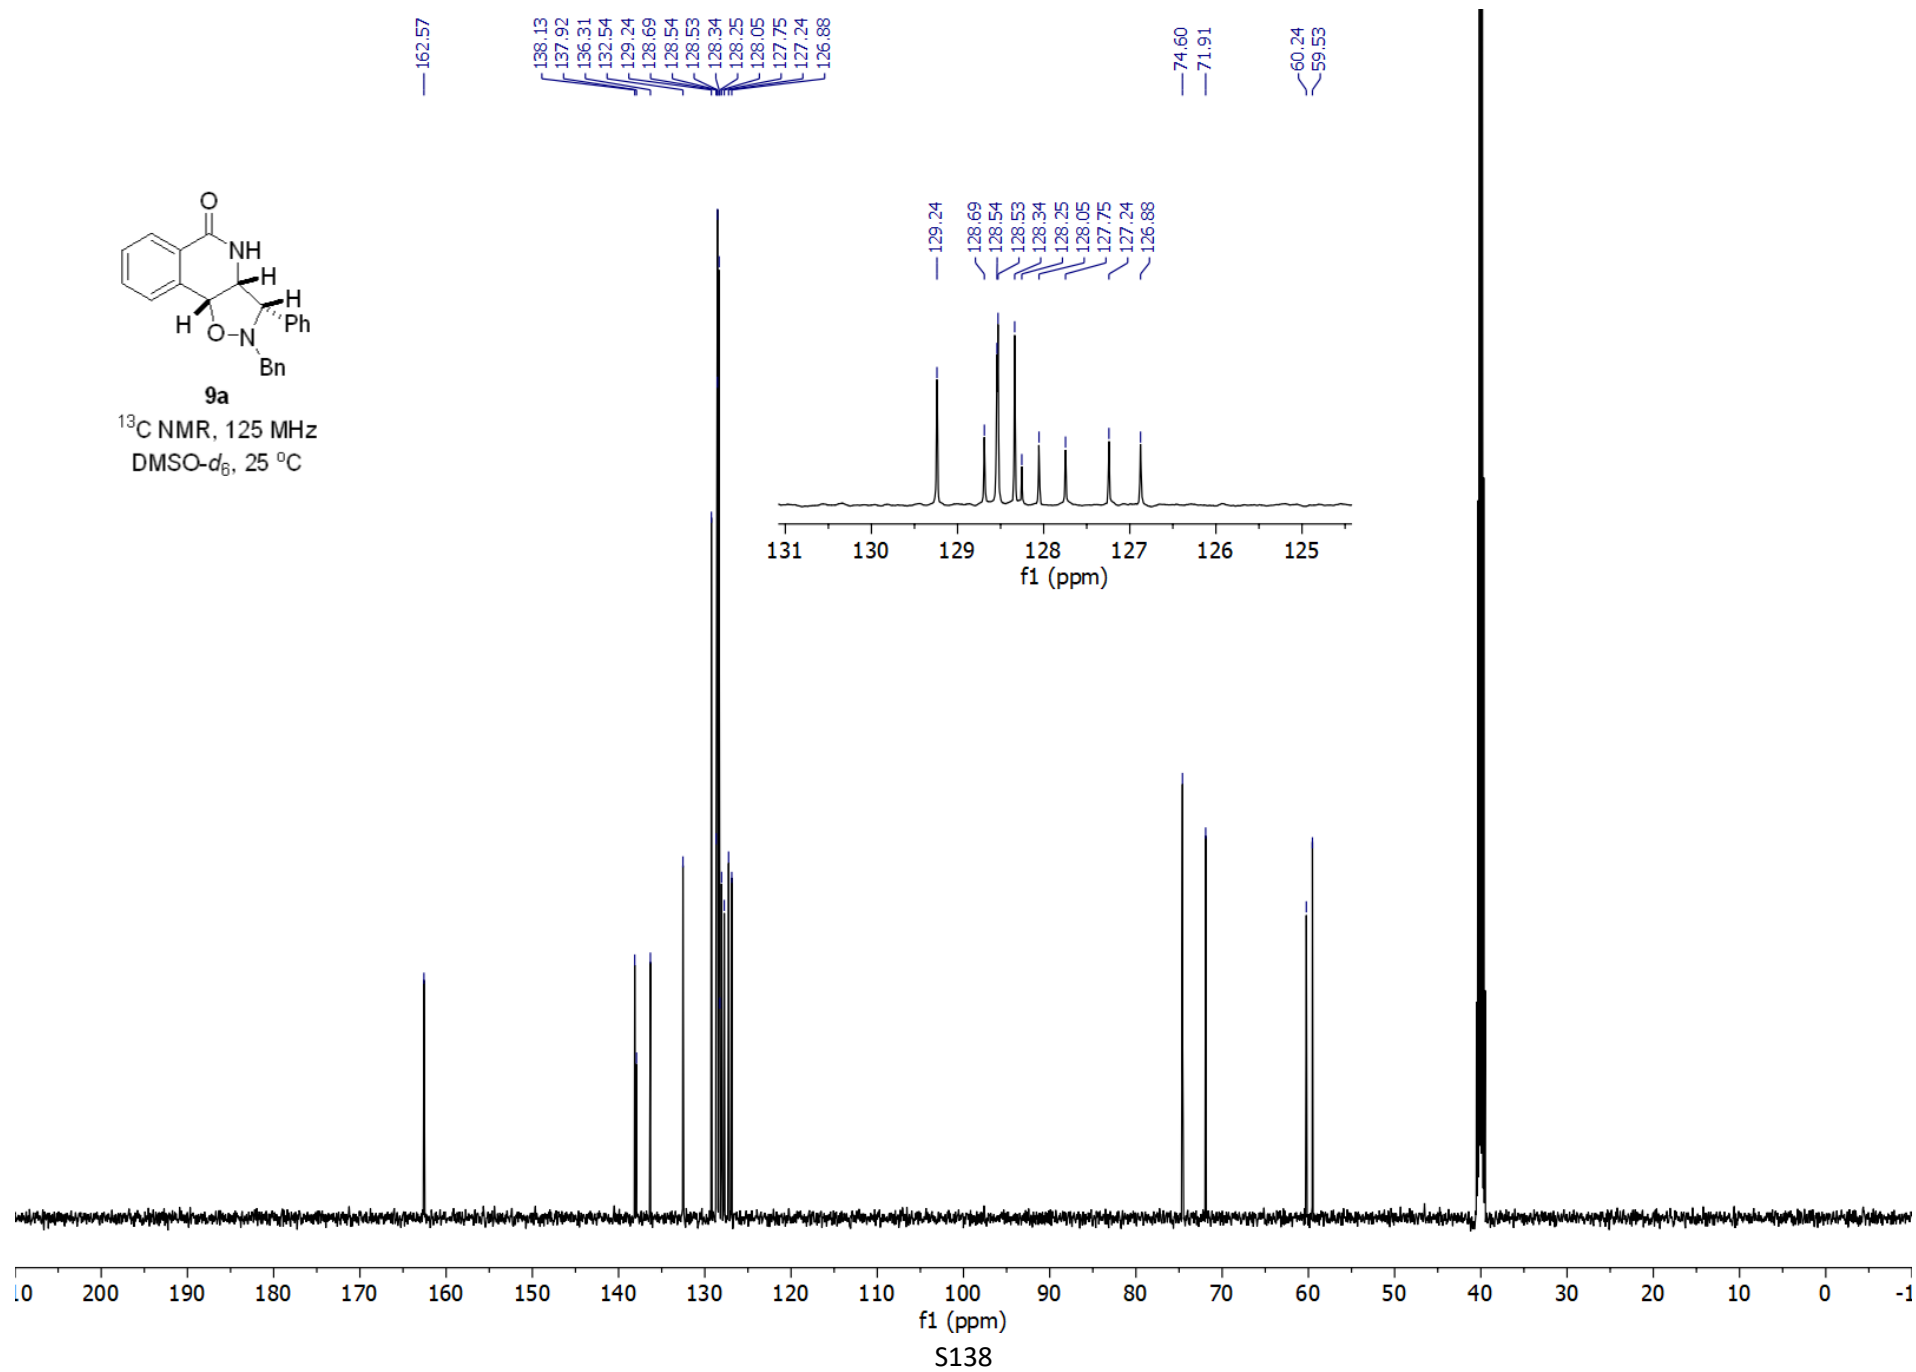

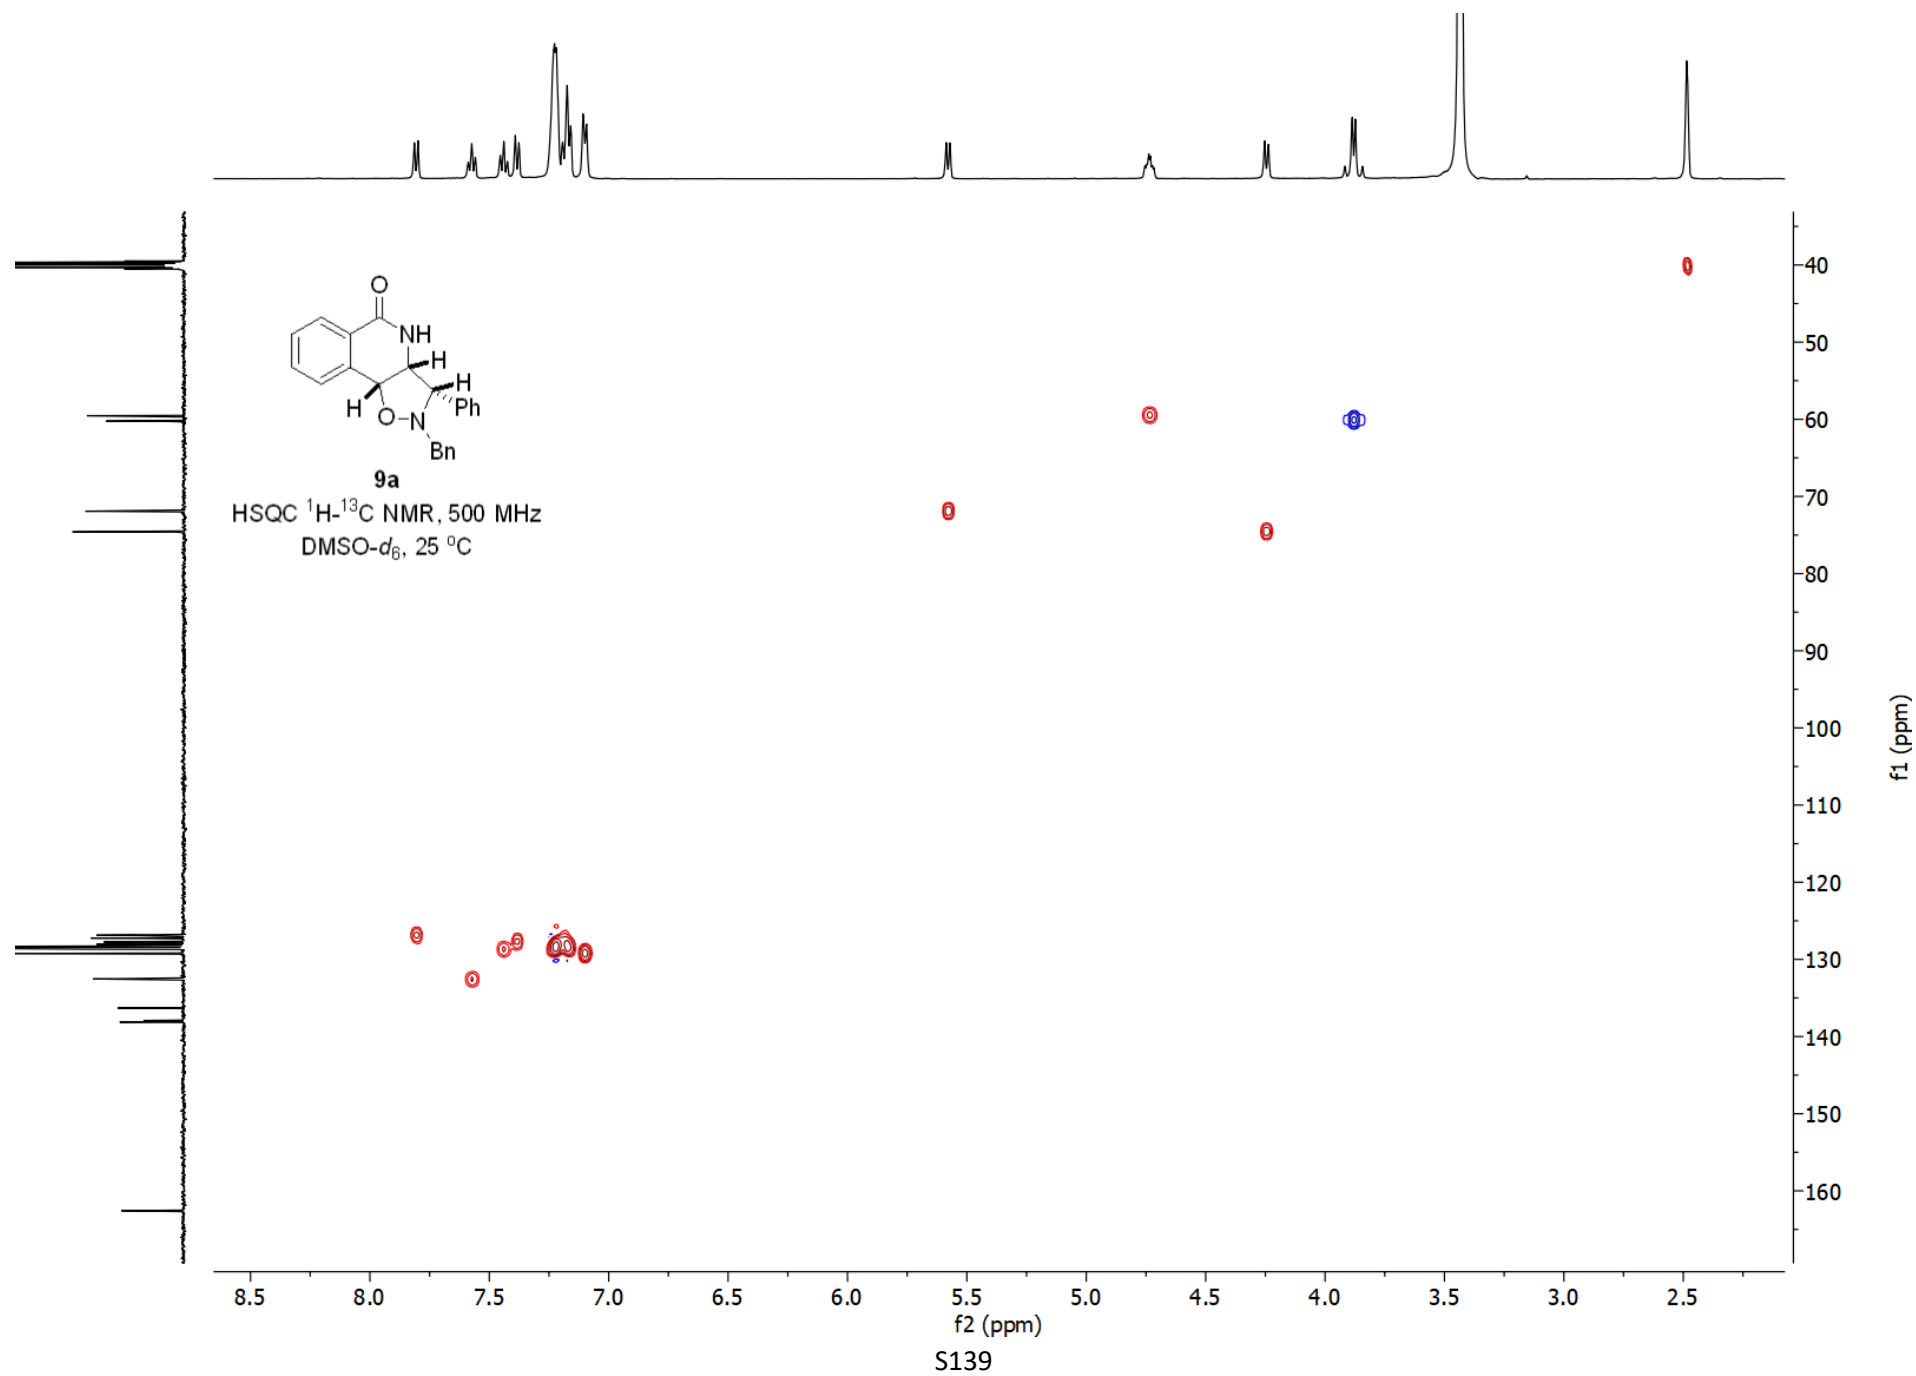

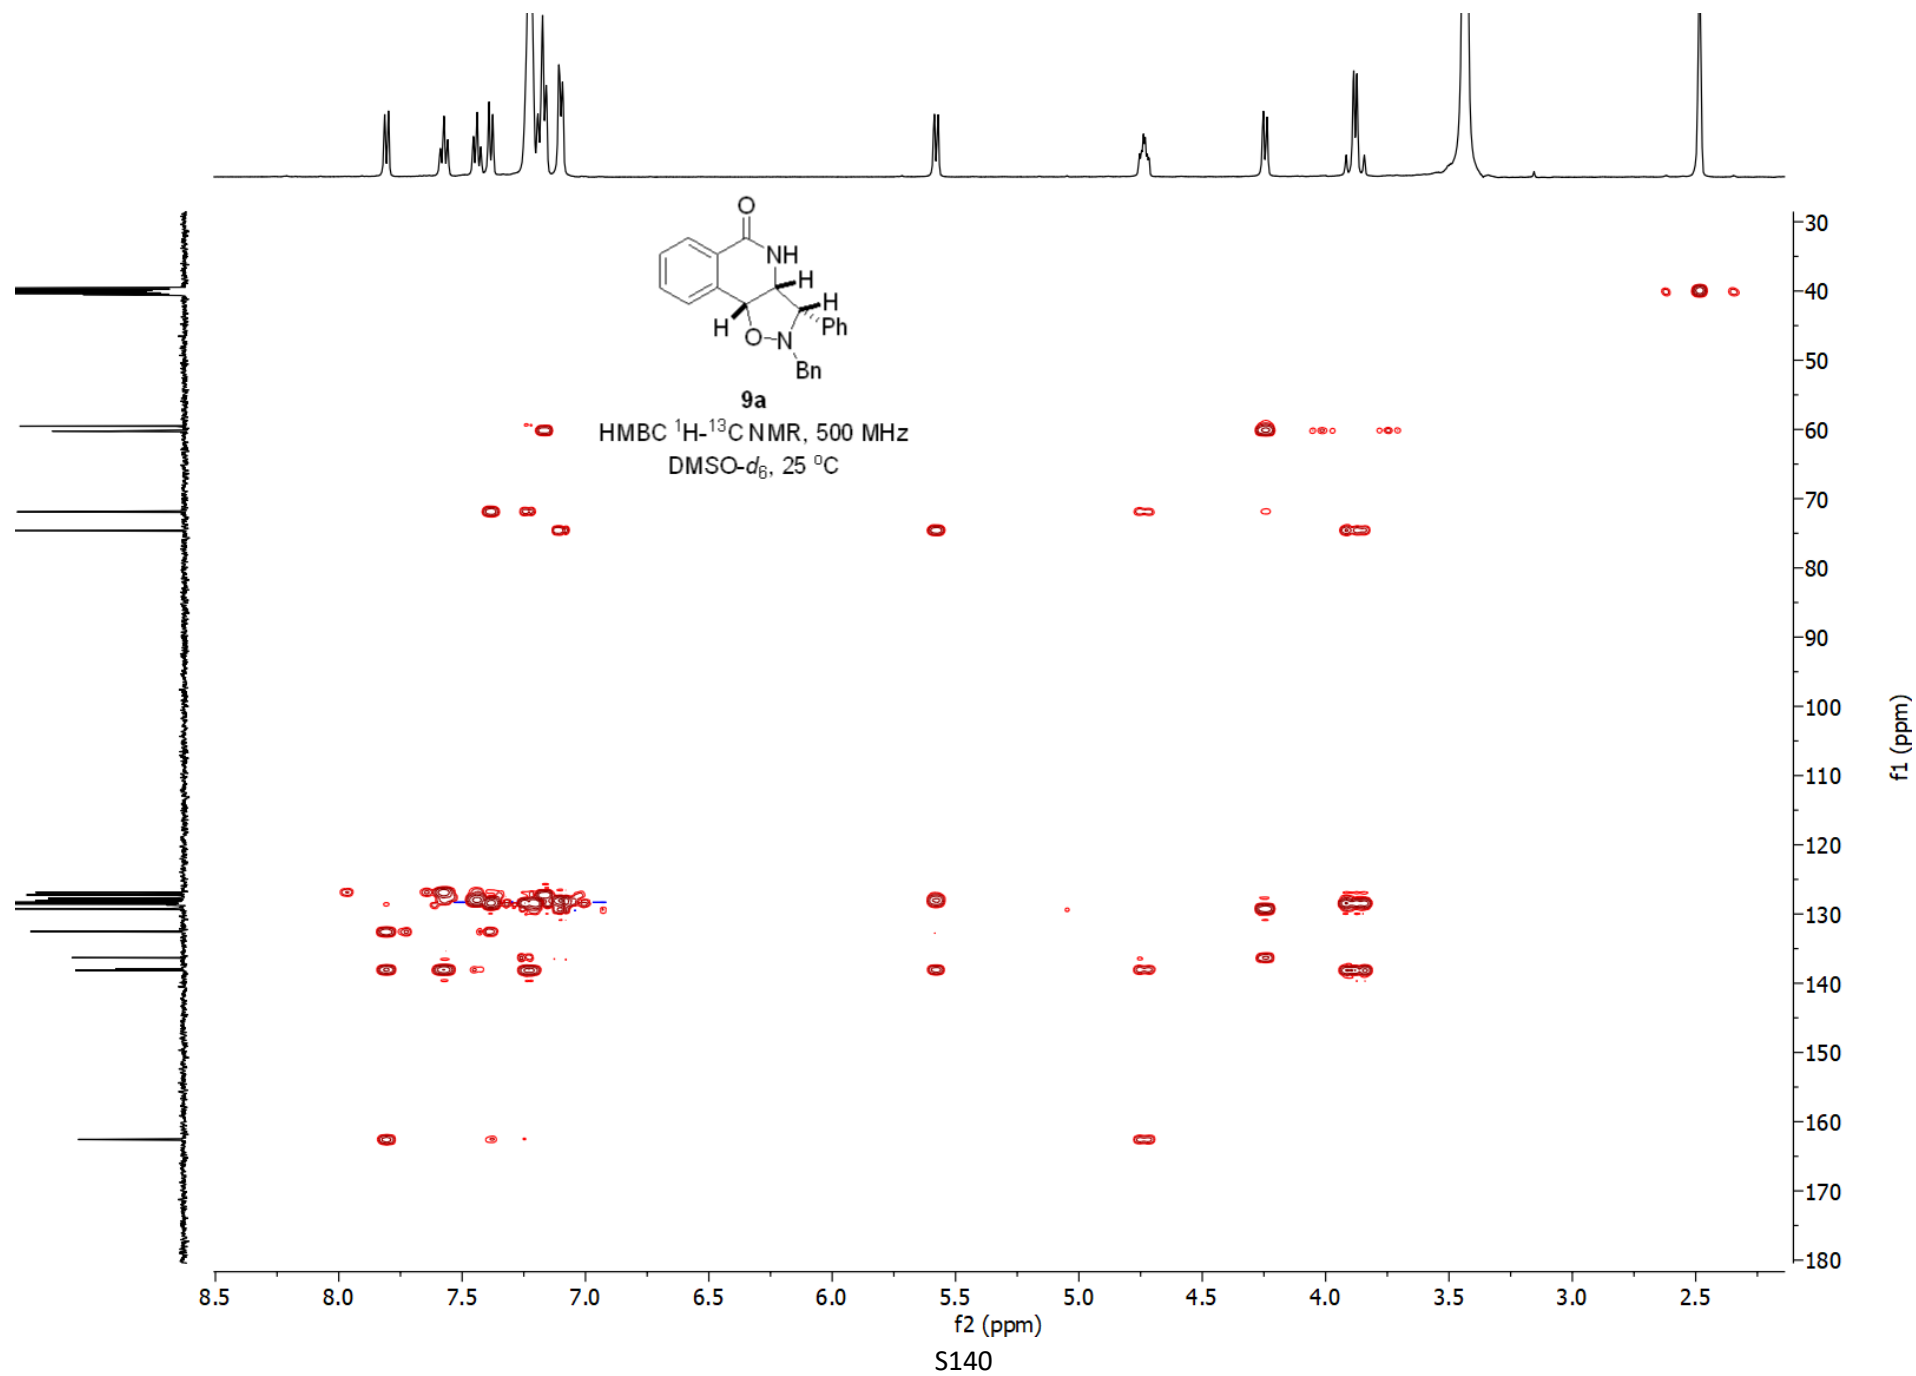

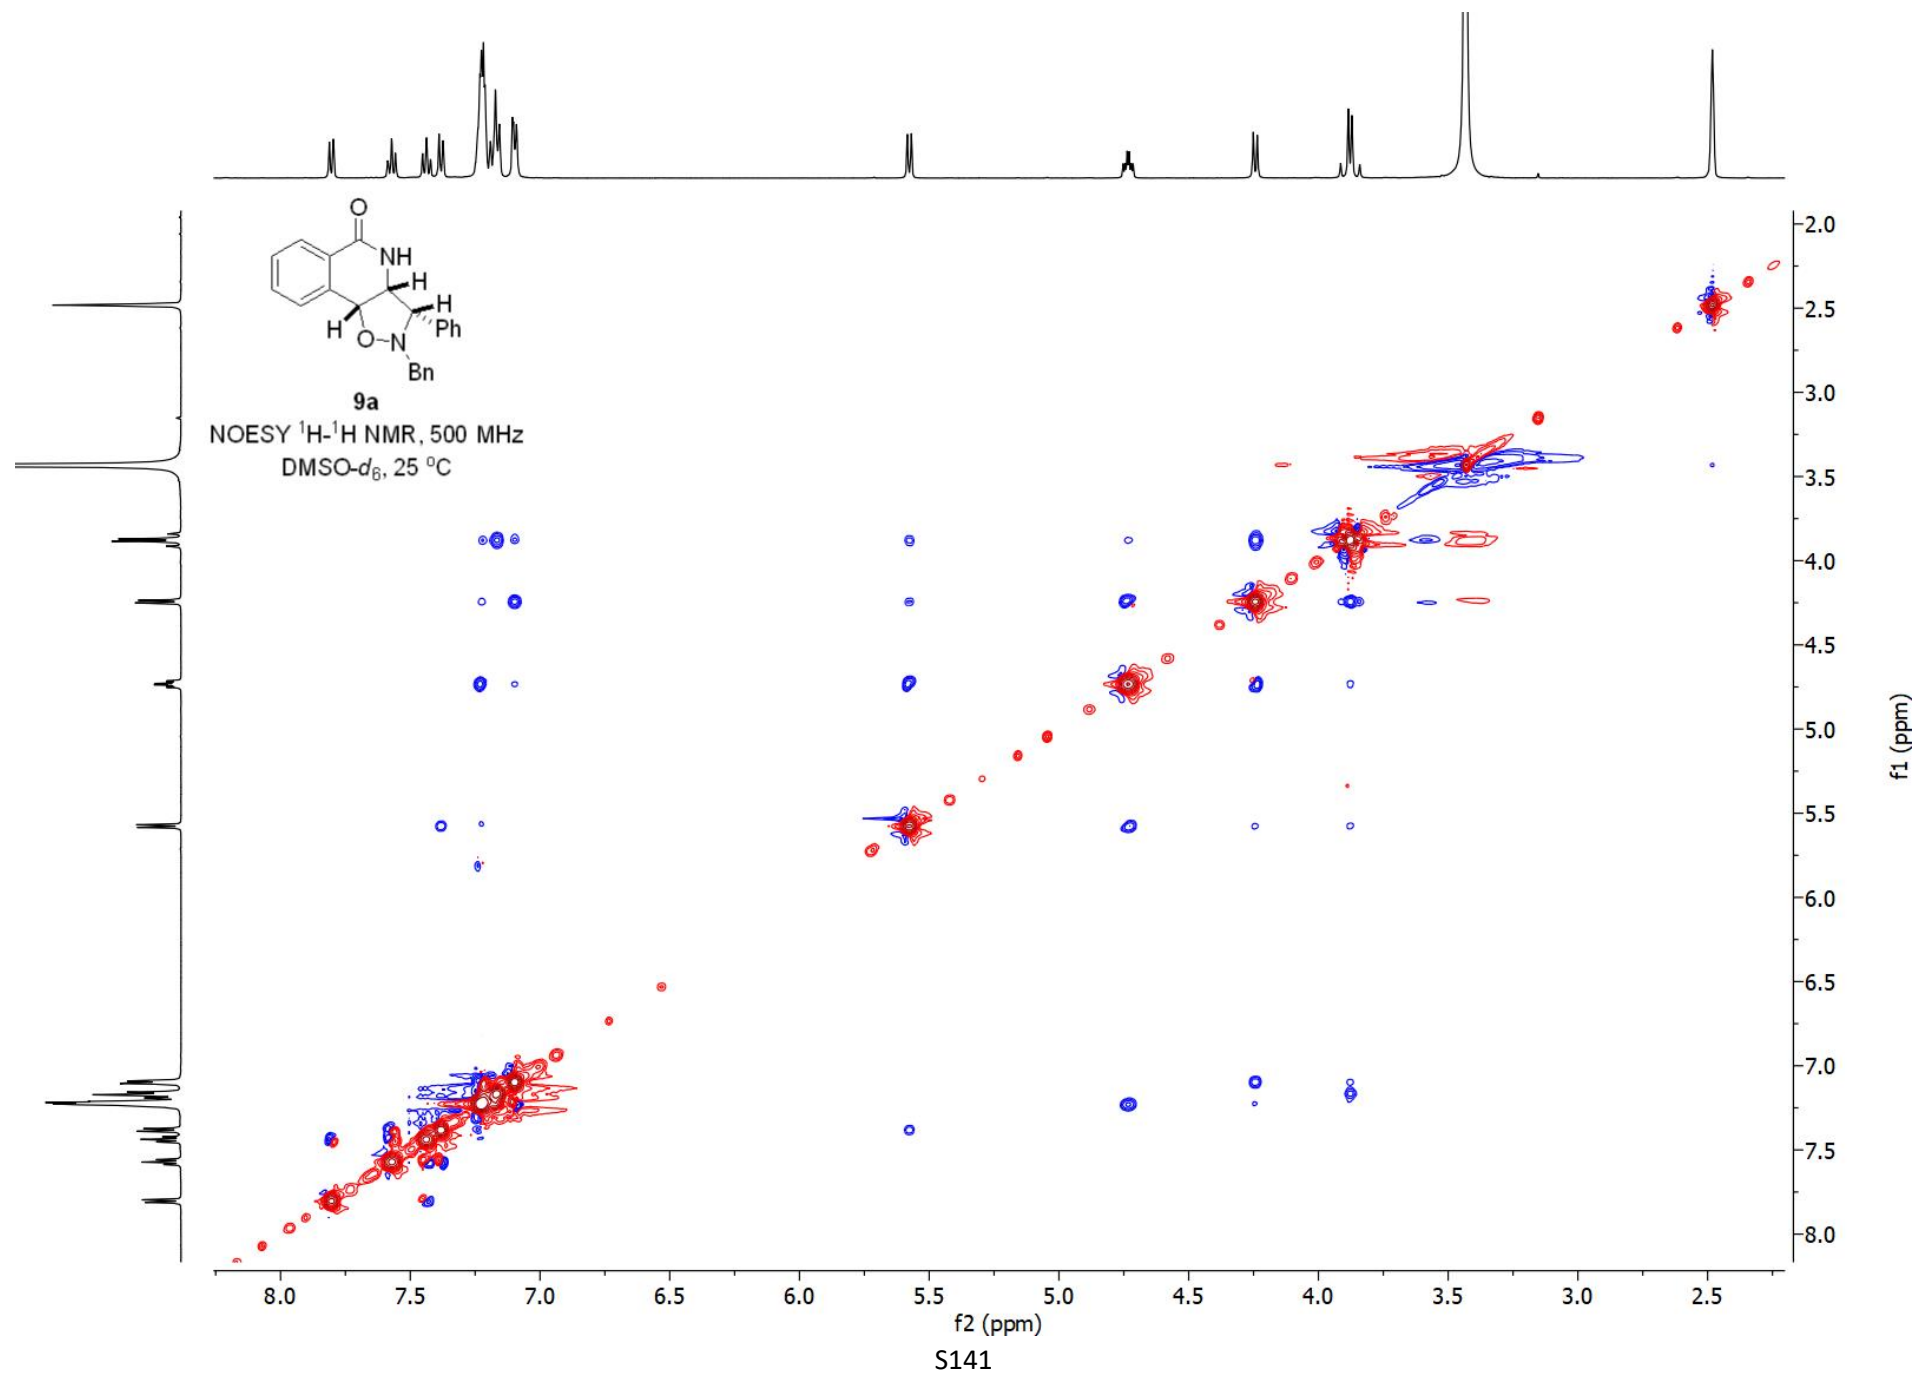

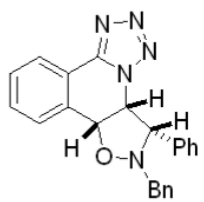

**10a**

$^1\text{H}$  NMR, 500 MHz  
 $\text{CDCl}_3$ , 25  $^\circ\text{C}$

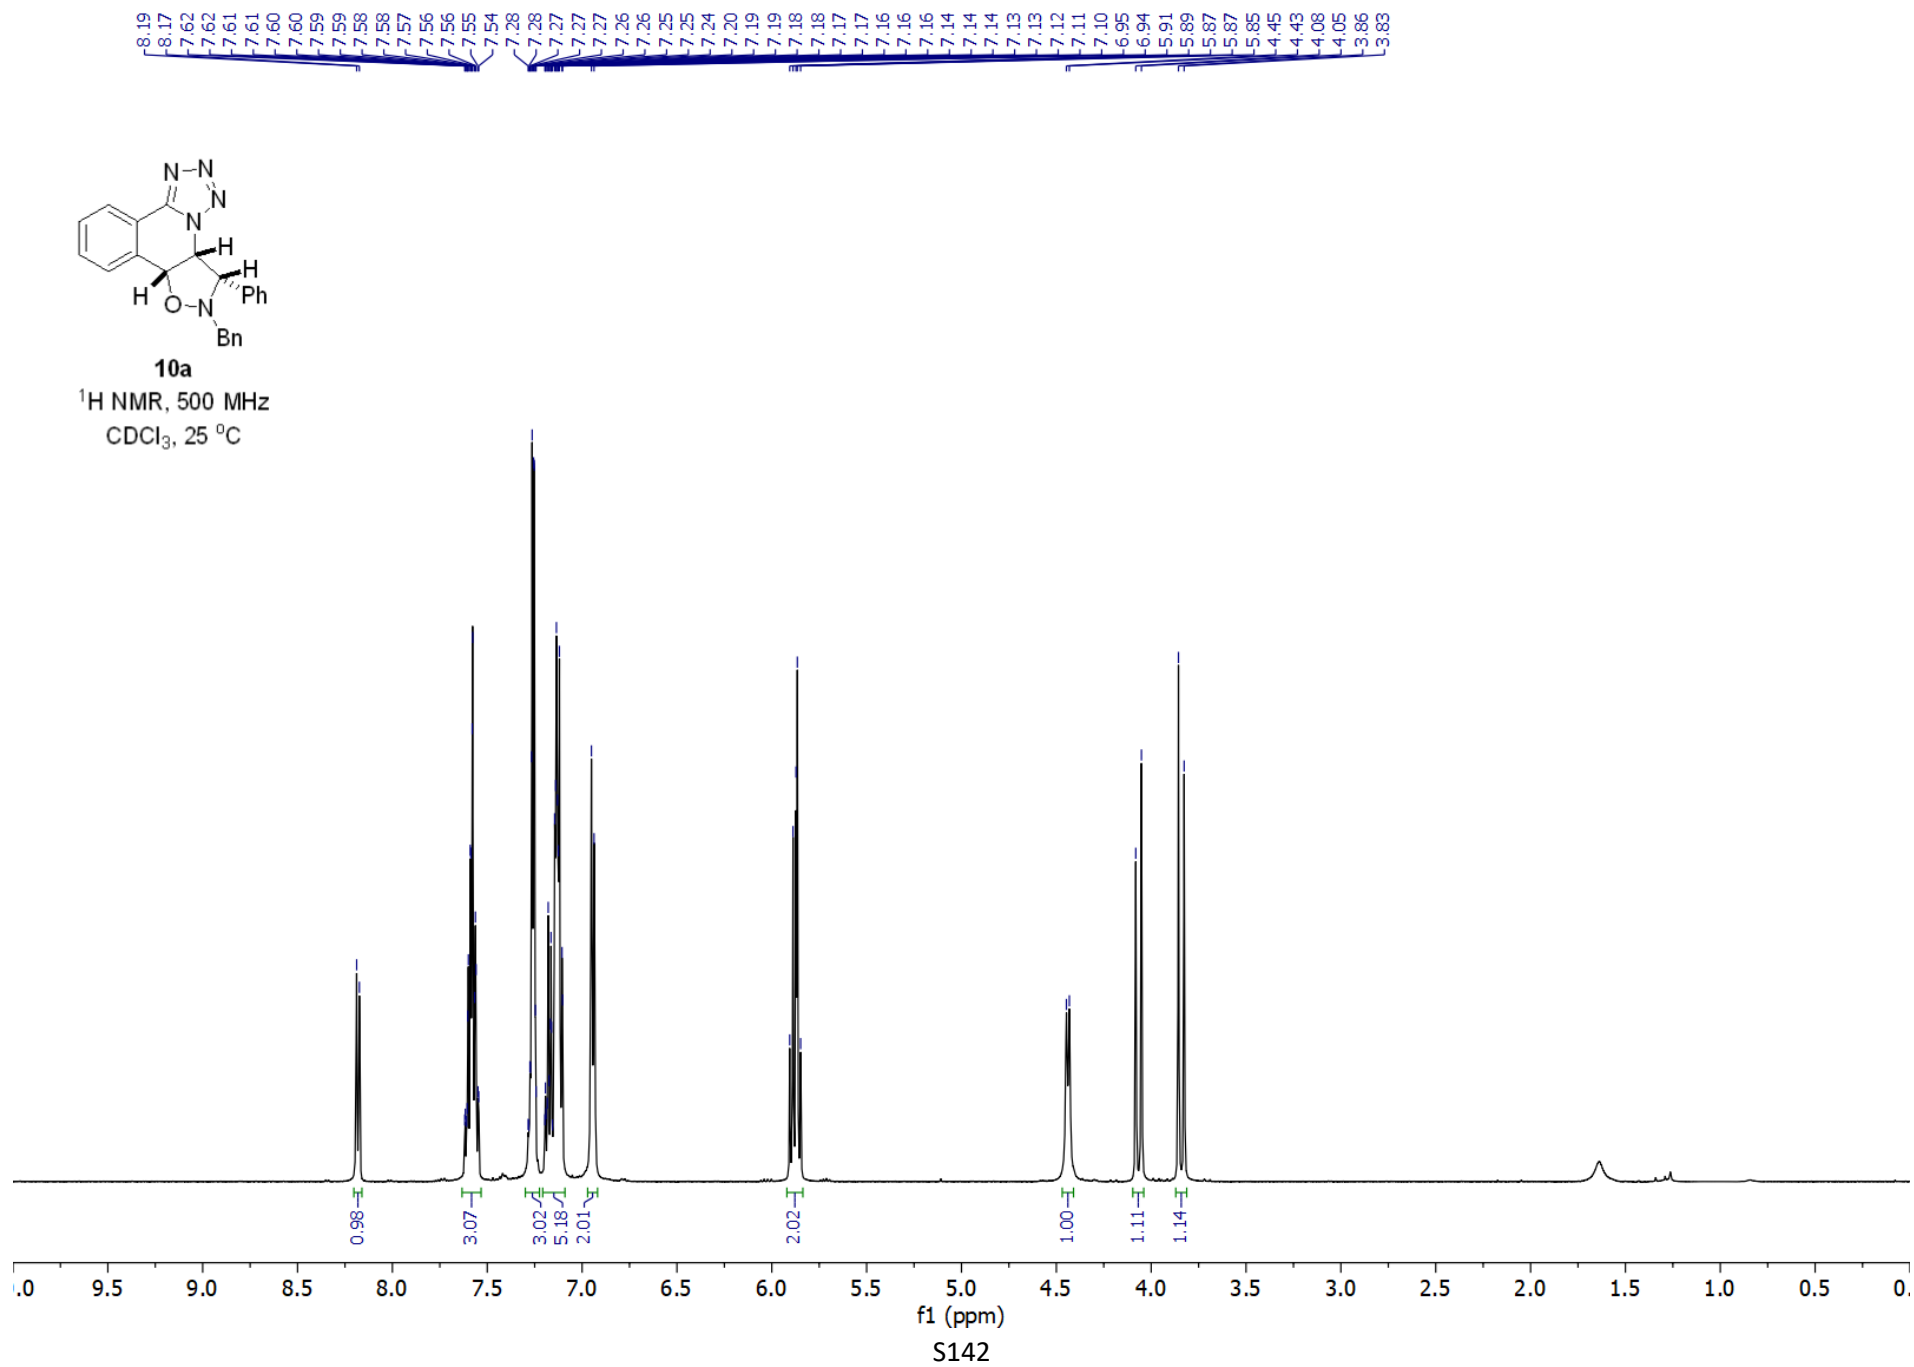

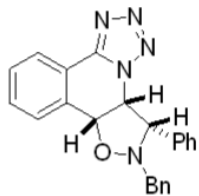

**10a**

$^{13}\text{C}$  NMR, 125 MHz  
 $\text{CDCl}_3$ , 25  $^\circ\text{C}$

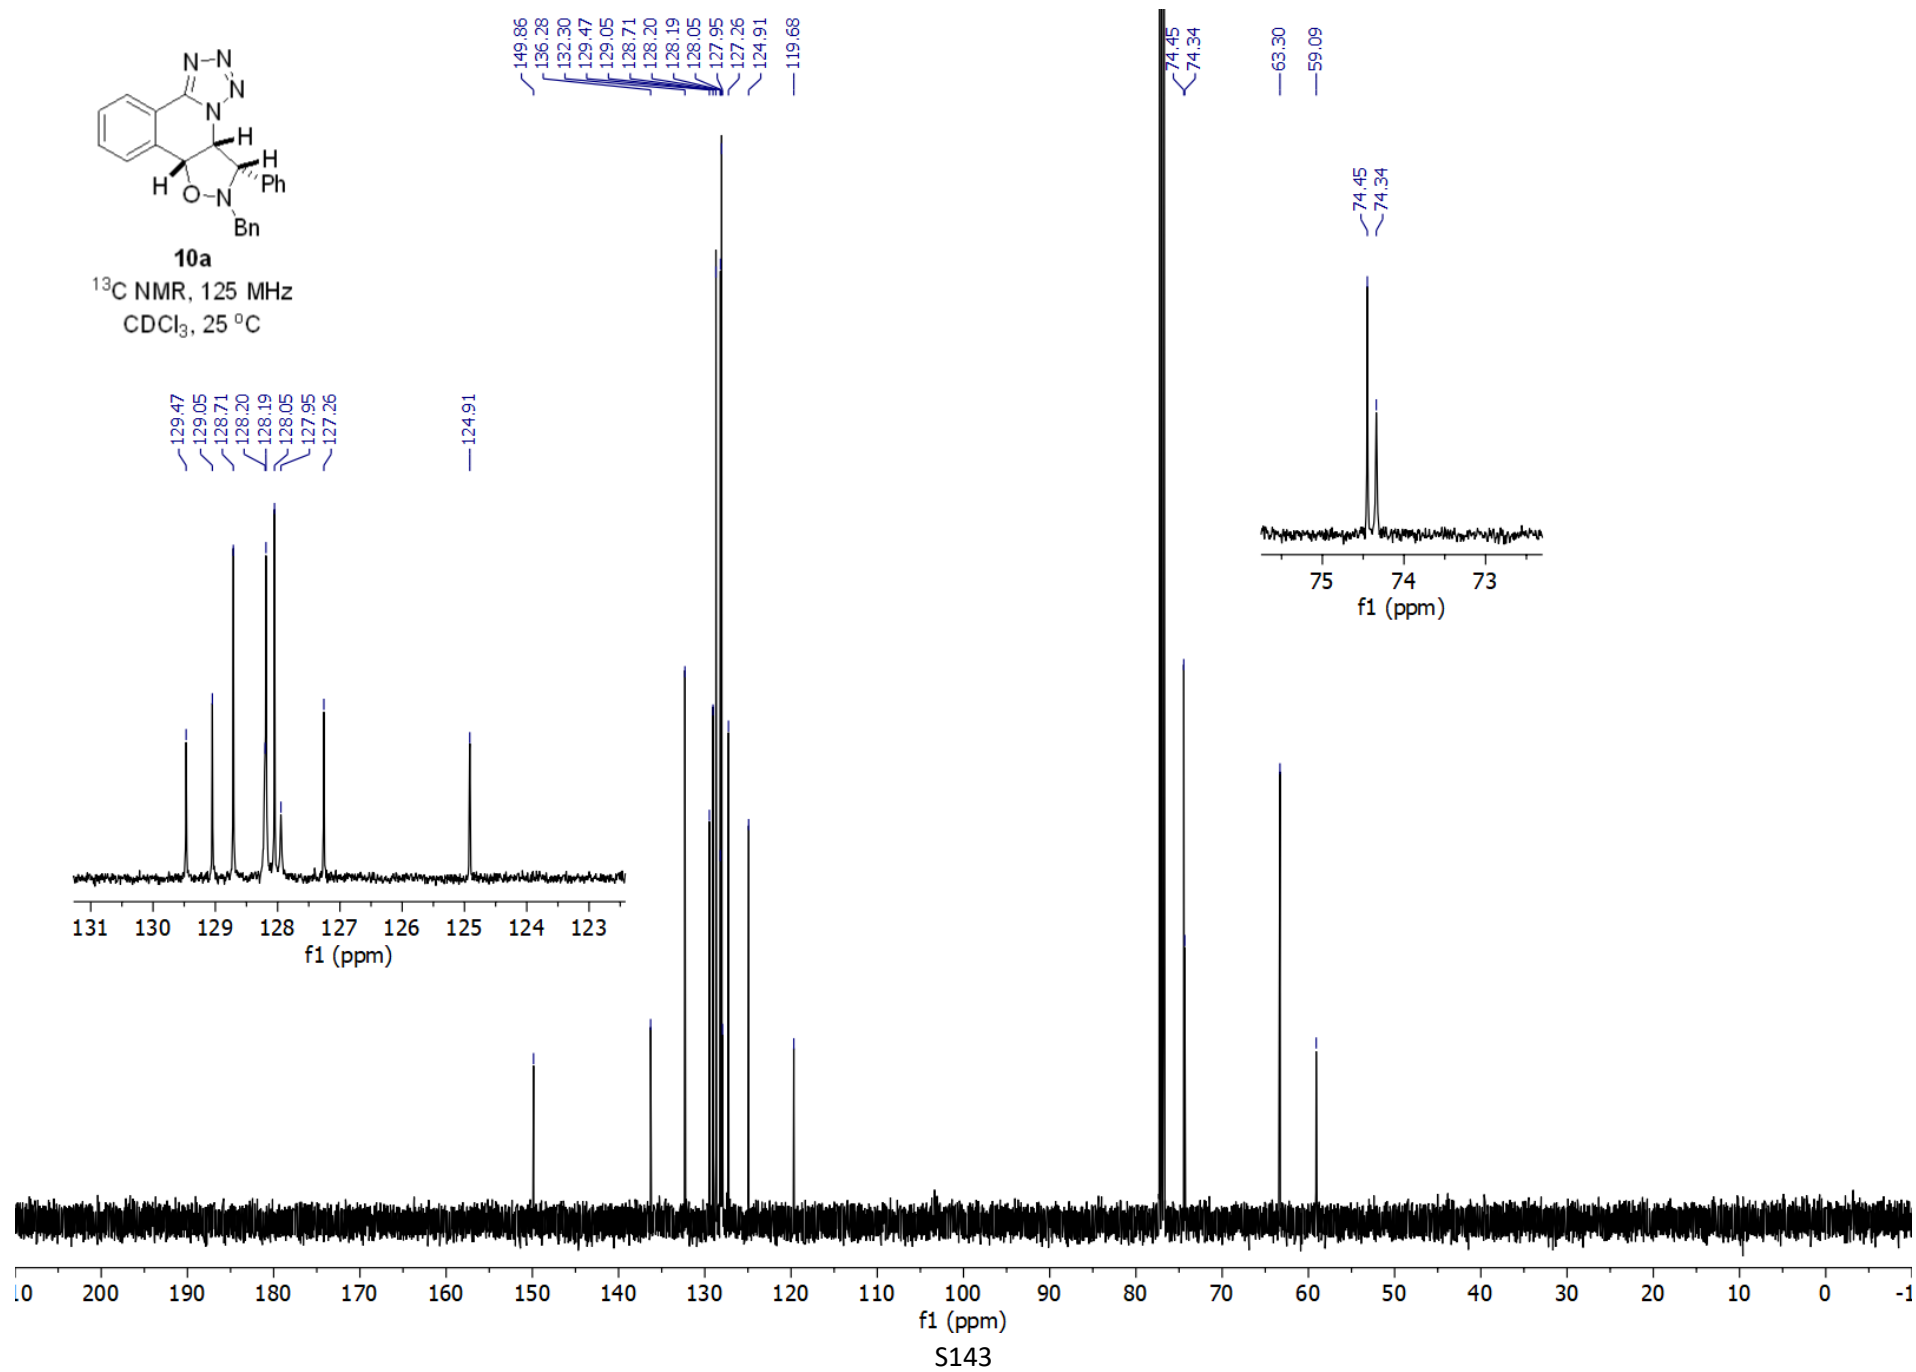

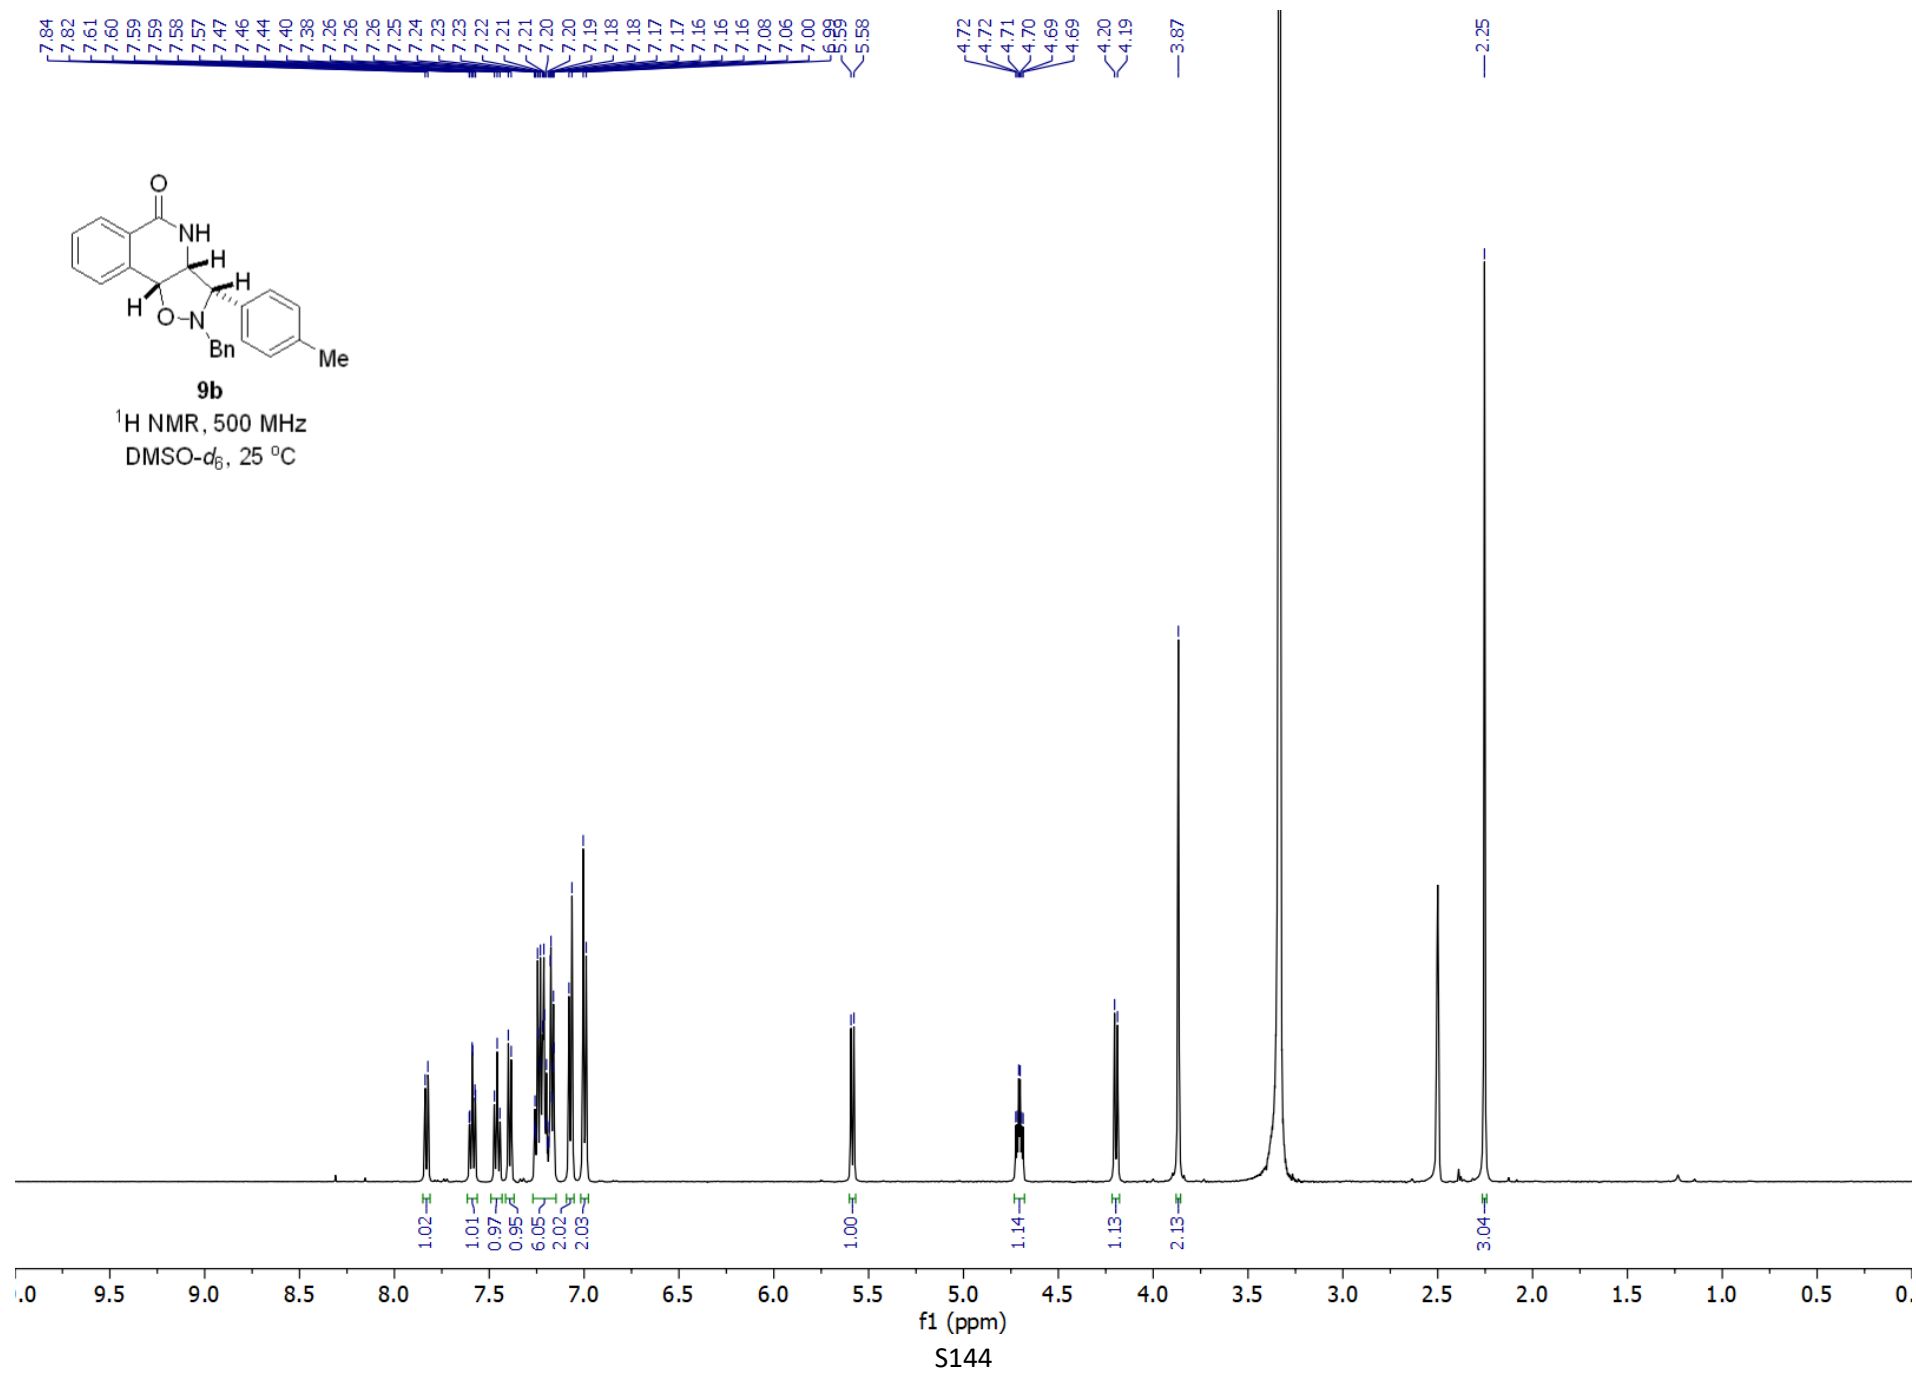

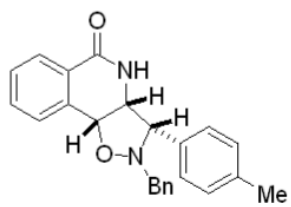

**9b**

$^{13}\text{C}$  NMR, 125 MHz  
DMSO- $d_6$ , 25 °C

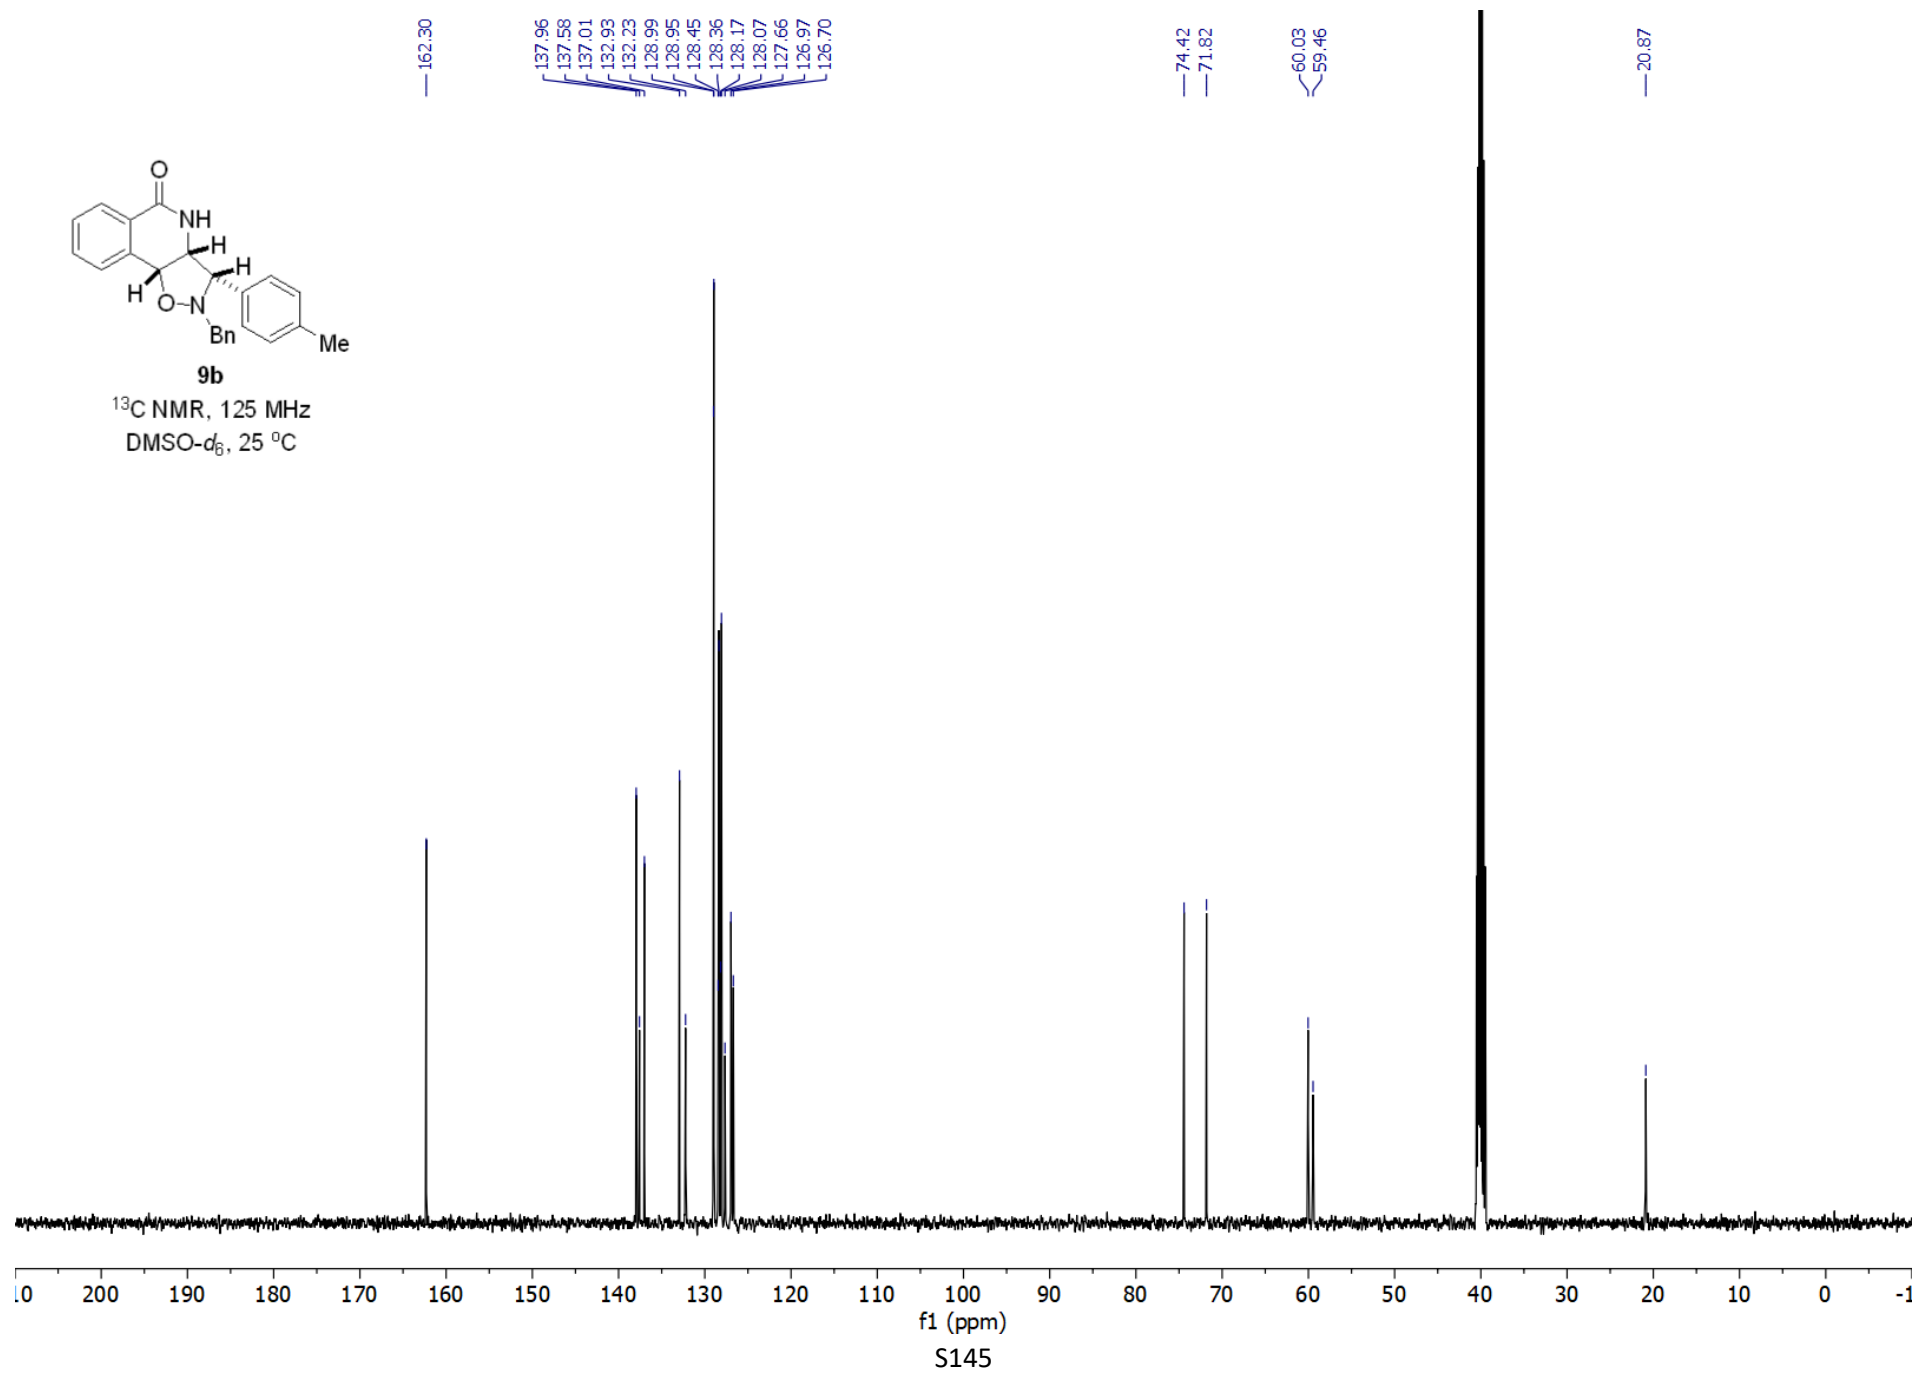

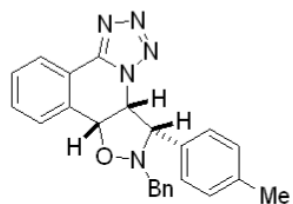

**10b**

$^1\text{H}$  NMR, 500 MHz  
 $\text{CDCl}_3$ , 25  $^\circ\text{C}$

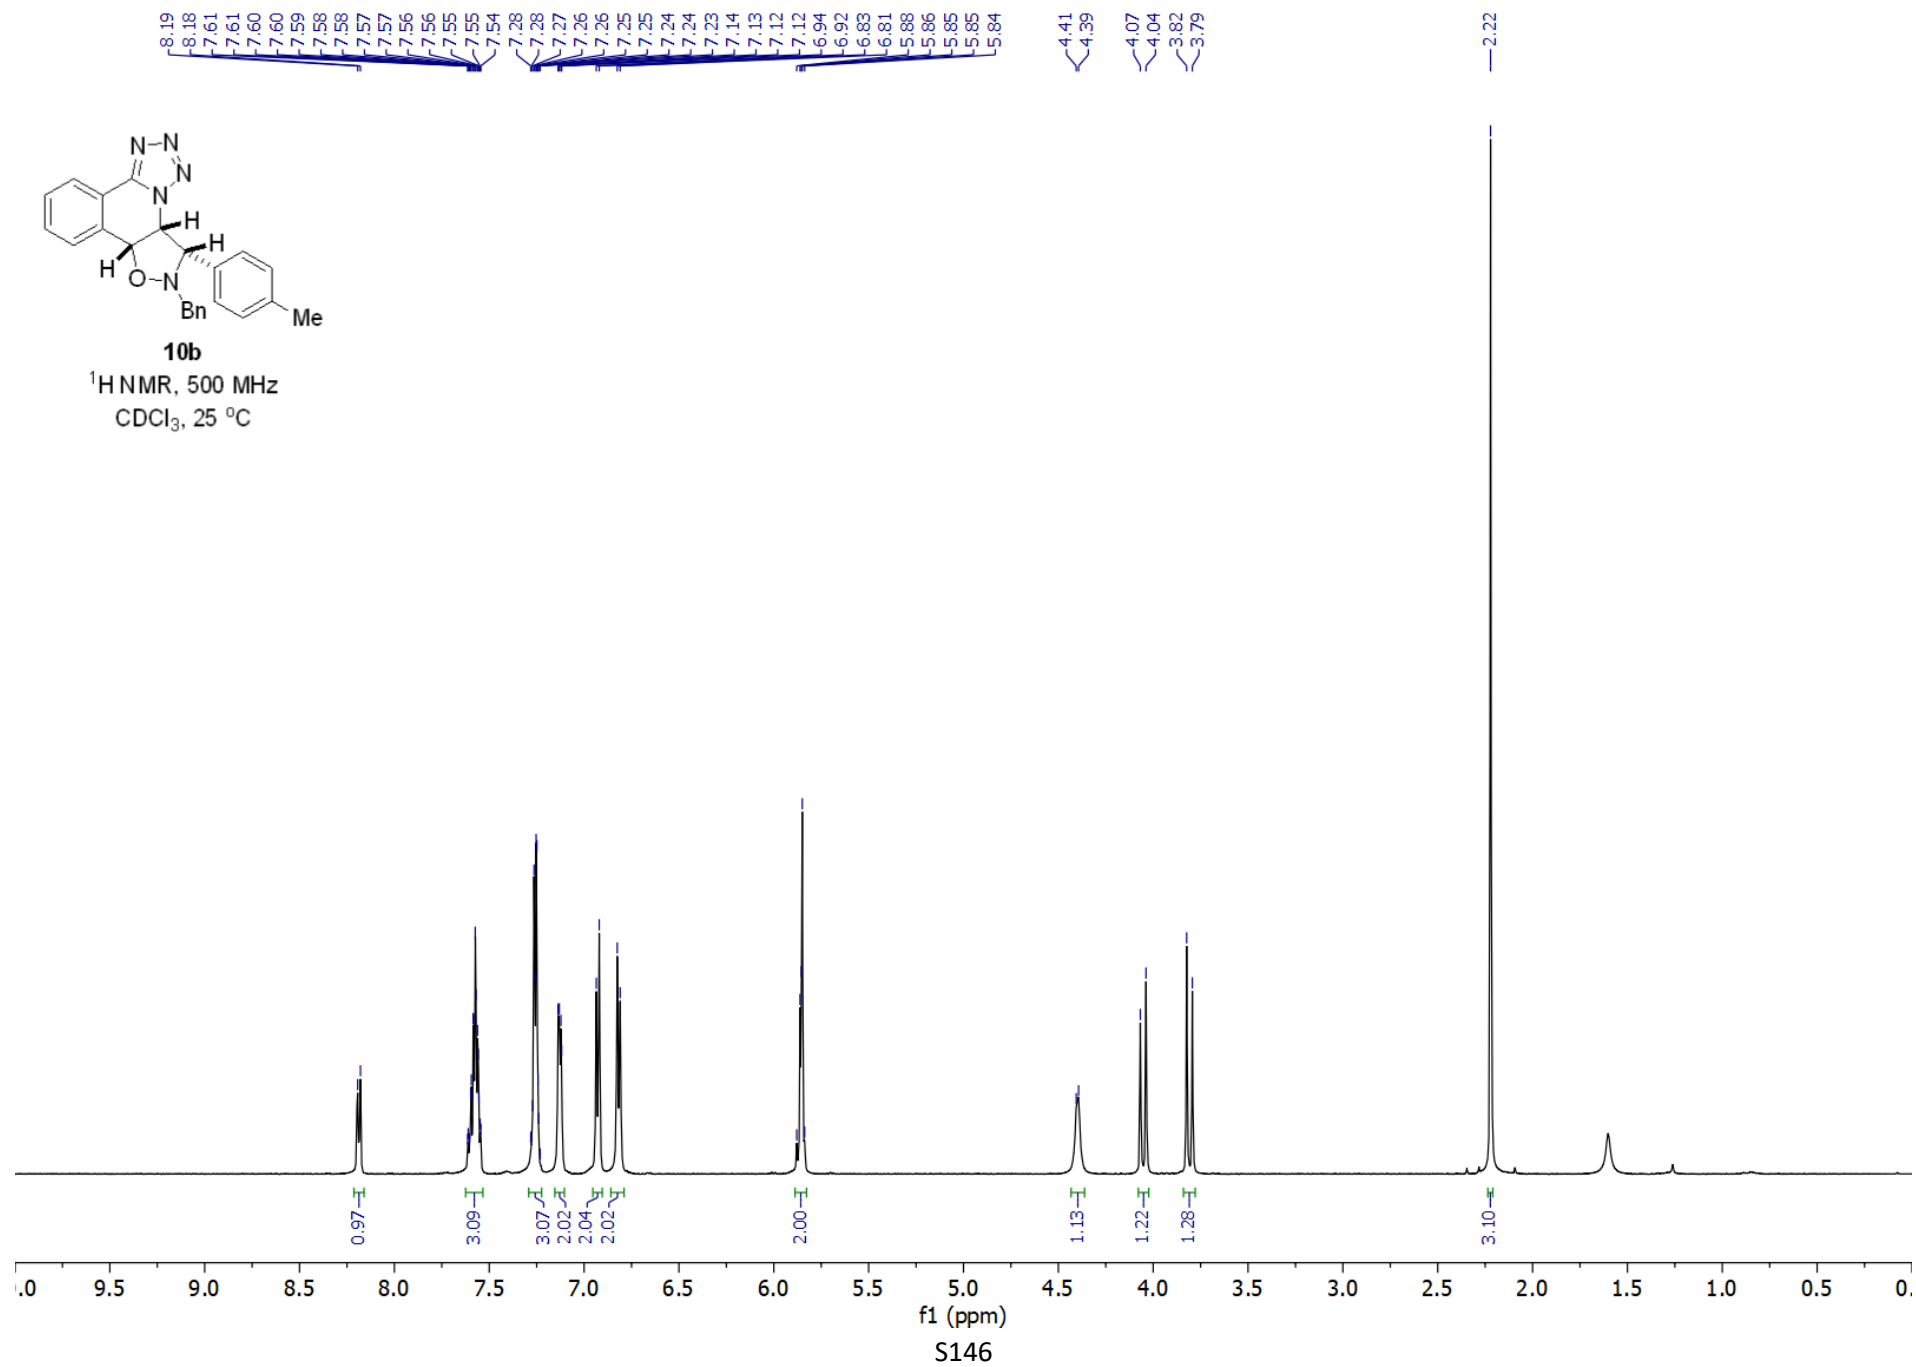

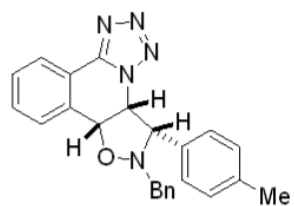

**10b**

$^{13}\text{C}$  NMR, 125 MHz  
 $\text{CDCl}_3$ , 25  $^\circ\text{C}$

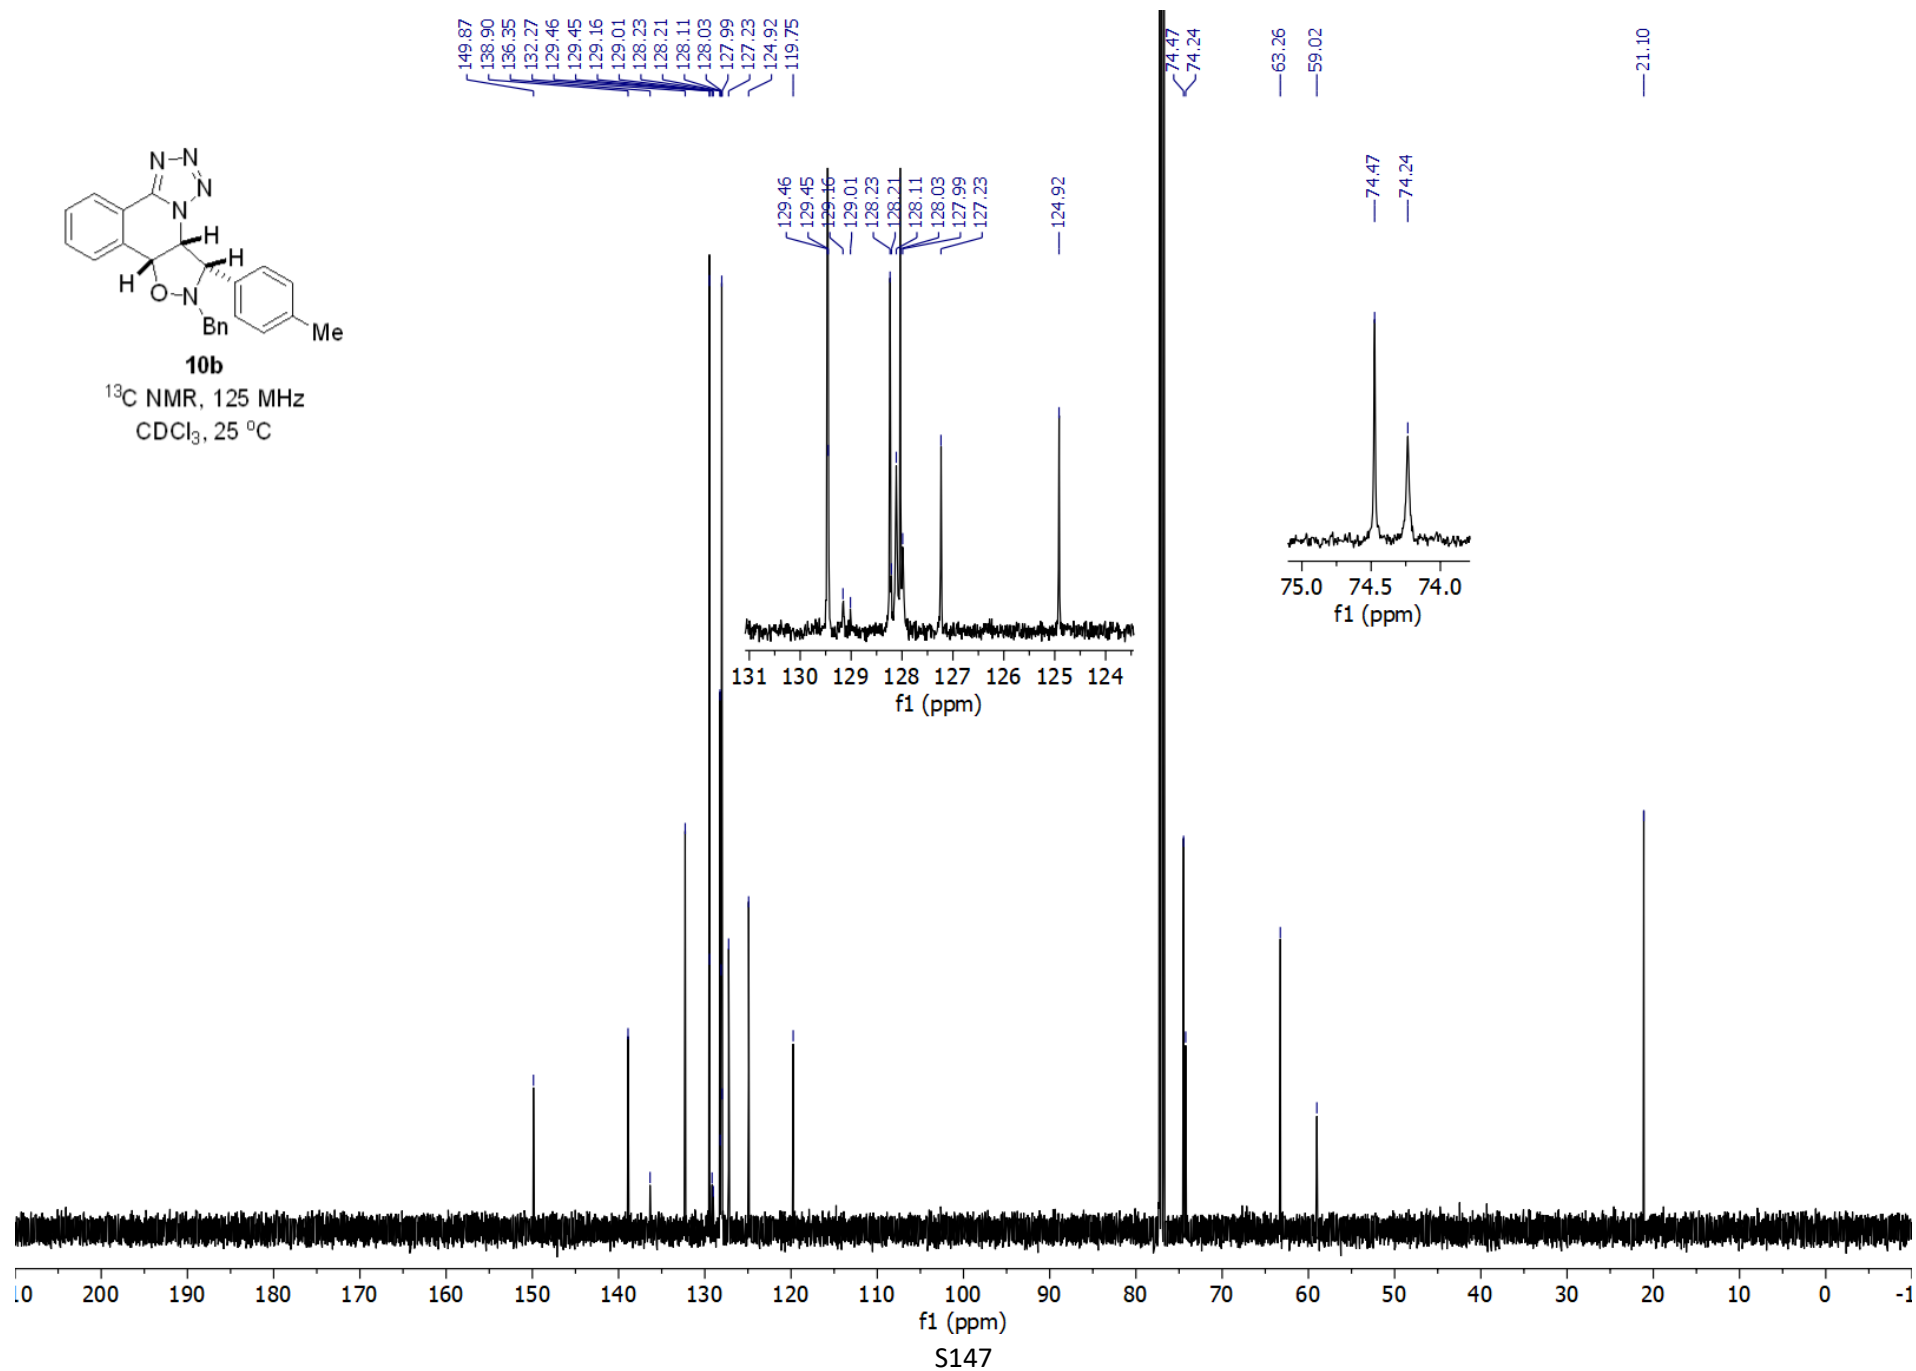

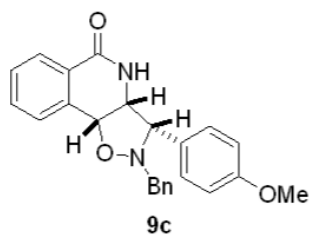

<sup>1</sup>H NMR, 500 MHz  
DMSO-*d*<sub>6</sub>, 25 °C

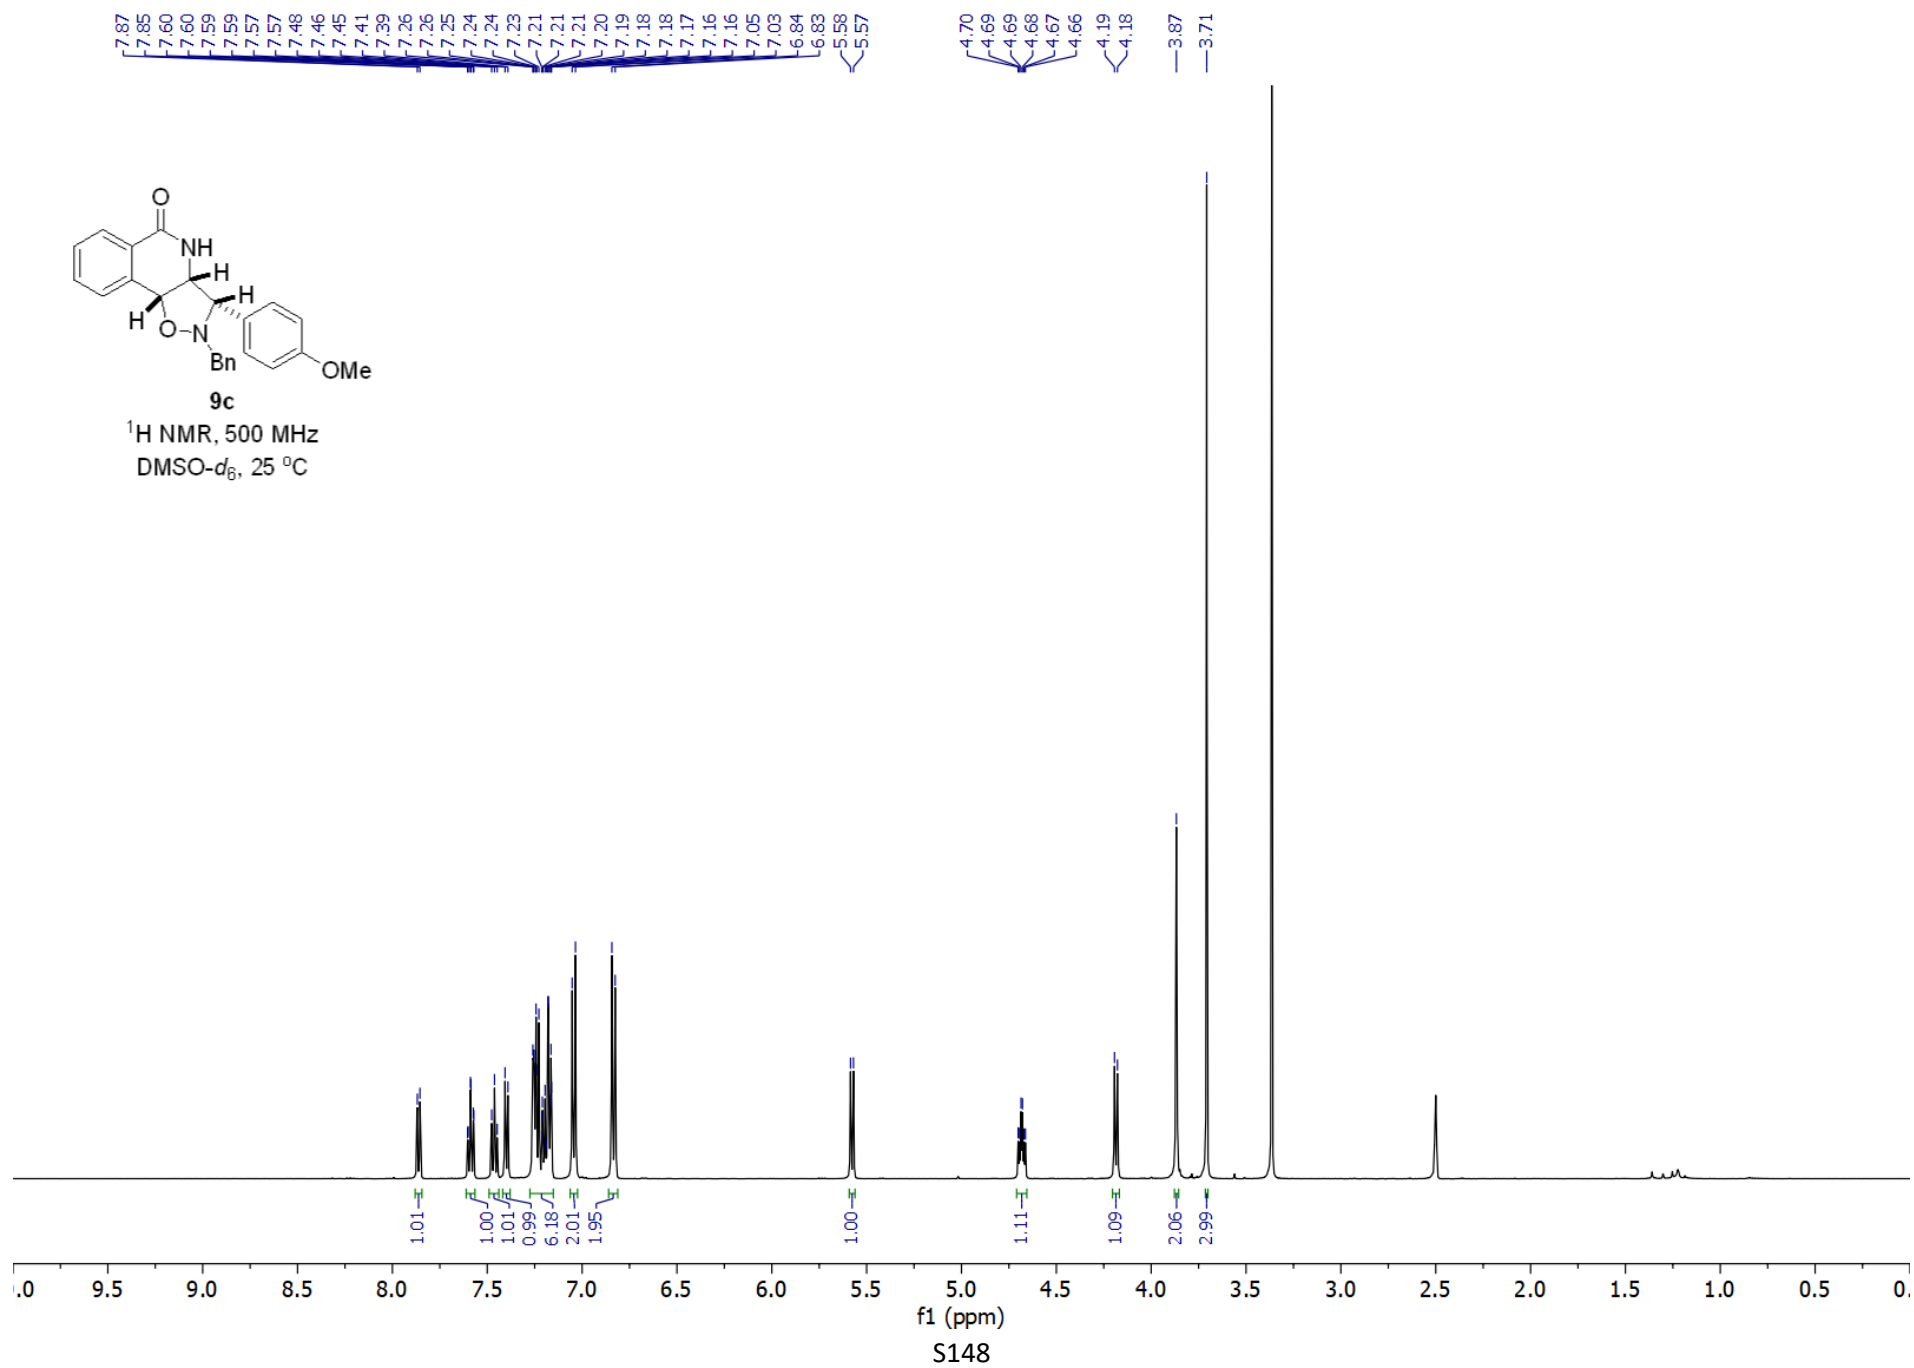

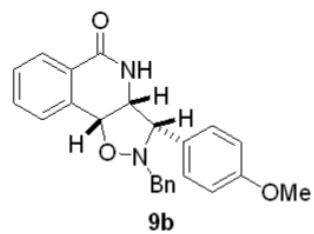

$^{13}\text{C}$  NMR, 125 MHz  
DMSO- $d_6$ , 25 °C

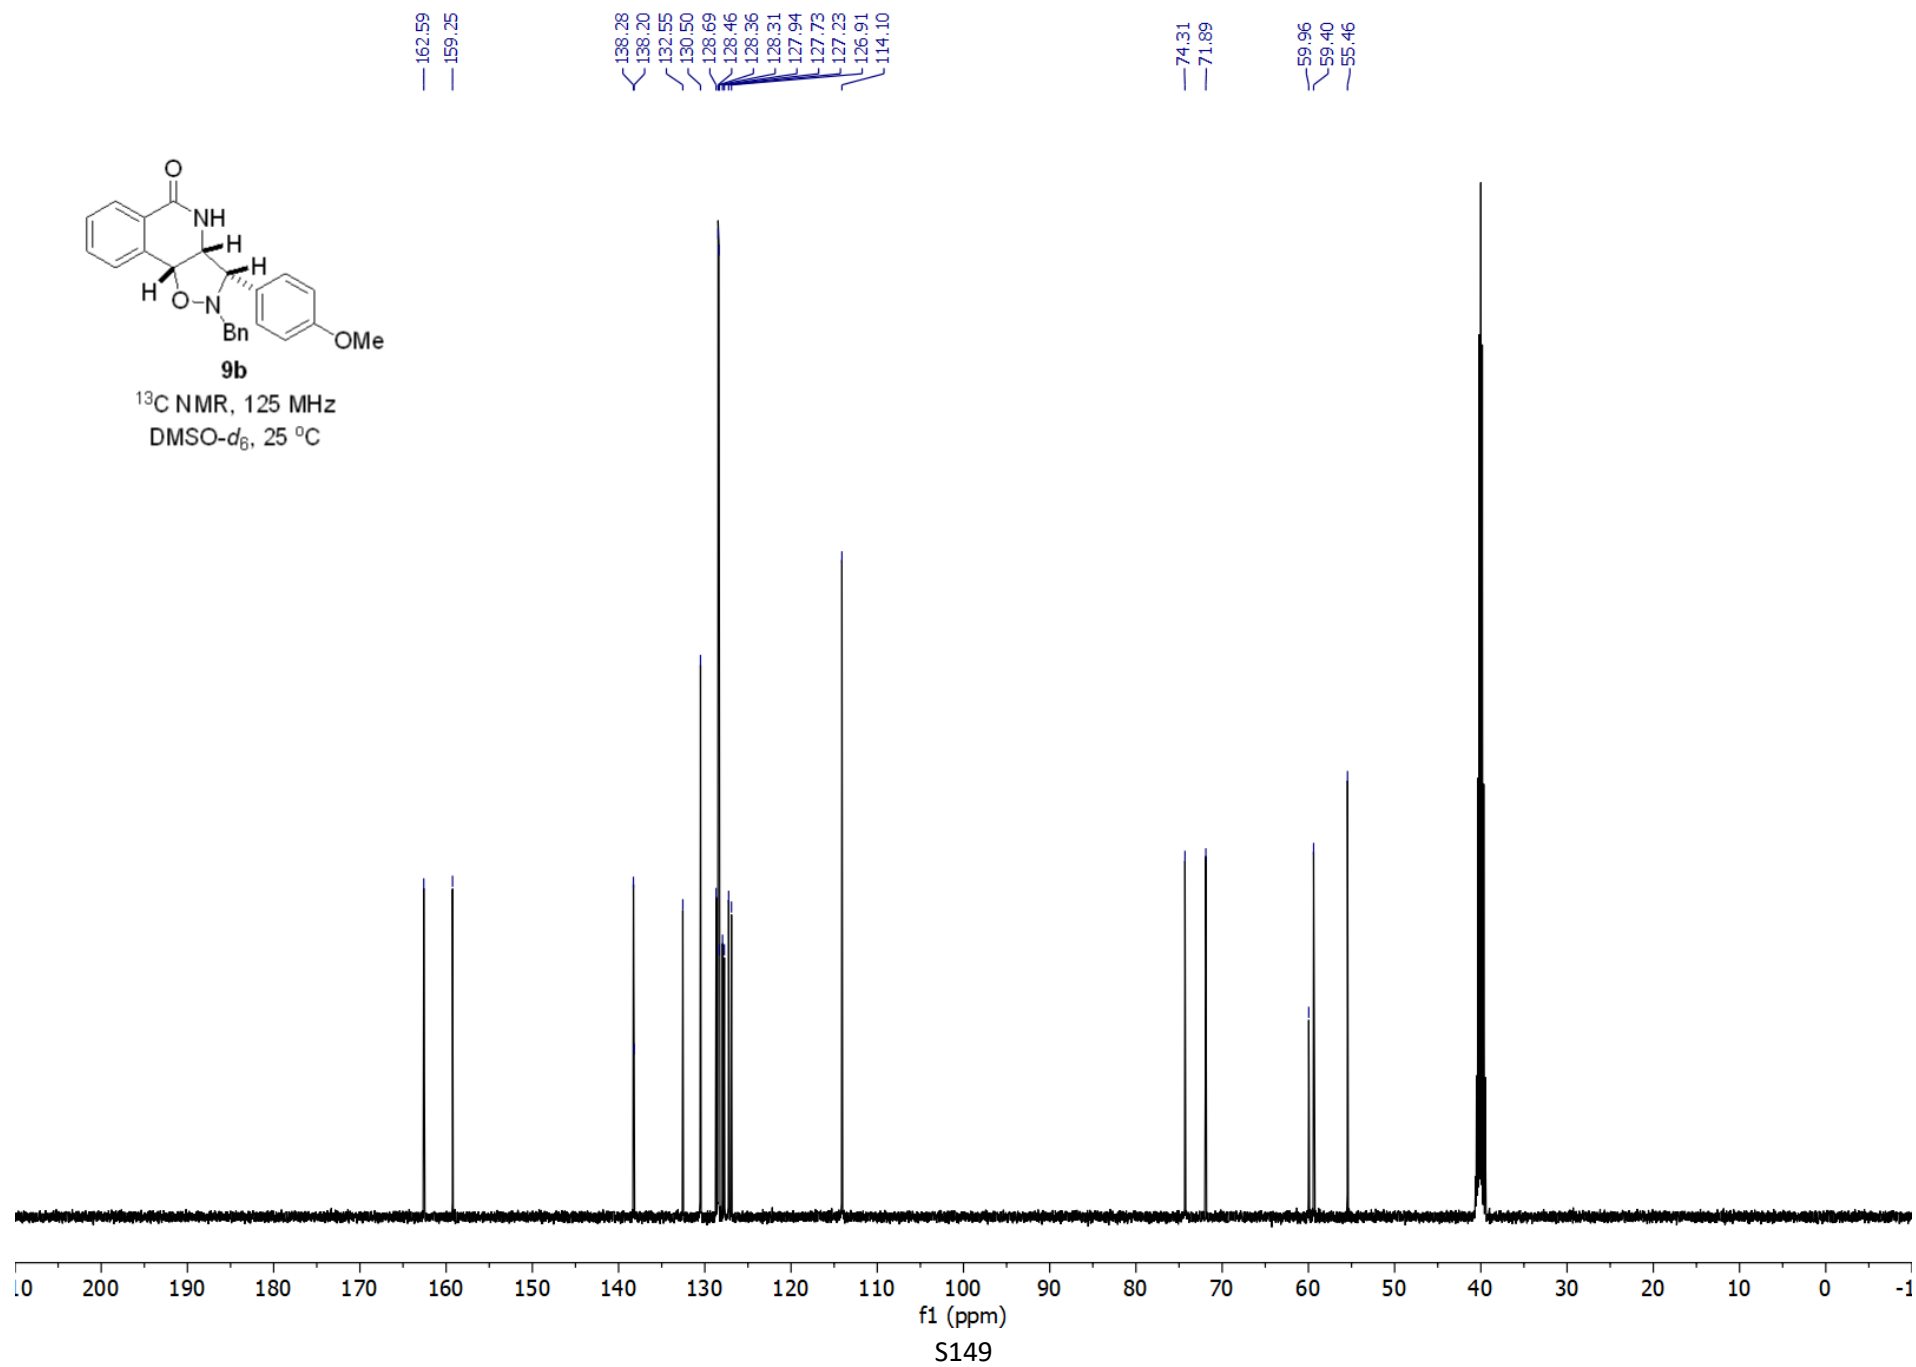

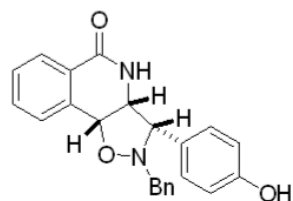

**9d**

$^1\text{H}$  NMR, 500 MHz  
DMSO- $d_6$ , 25  $^\circ\text{C}$

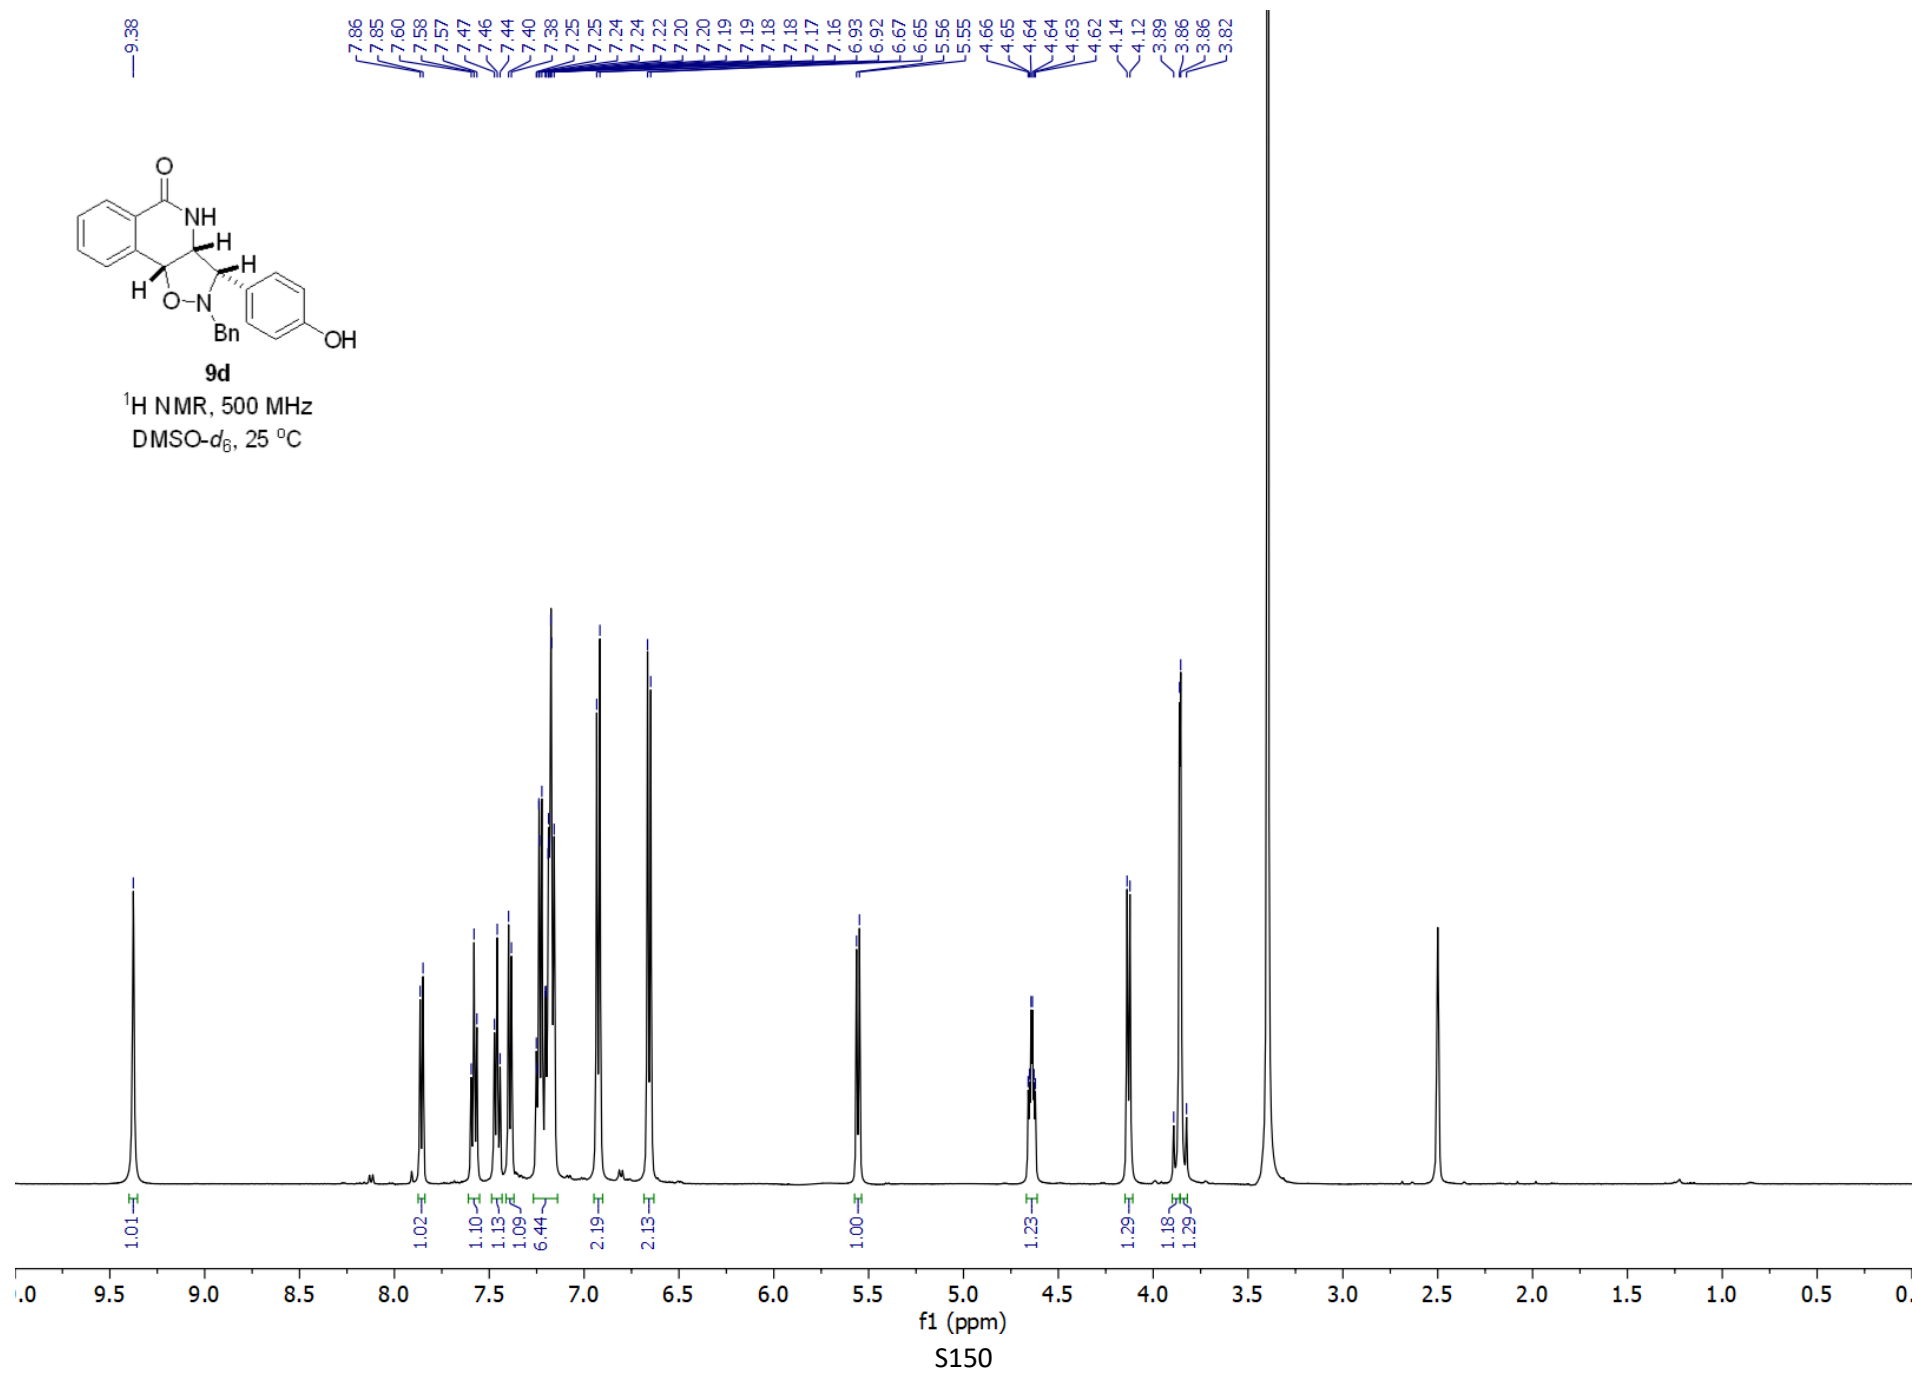

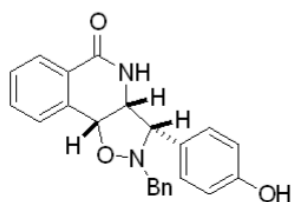

**9d**

$^{13}\text{C}$  NMR, 125 MHz  
DMSO- $d_6$ , 25 °C

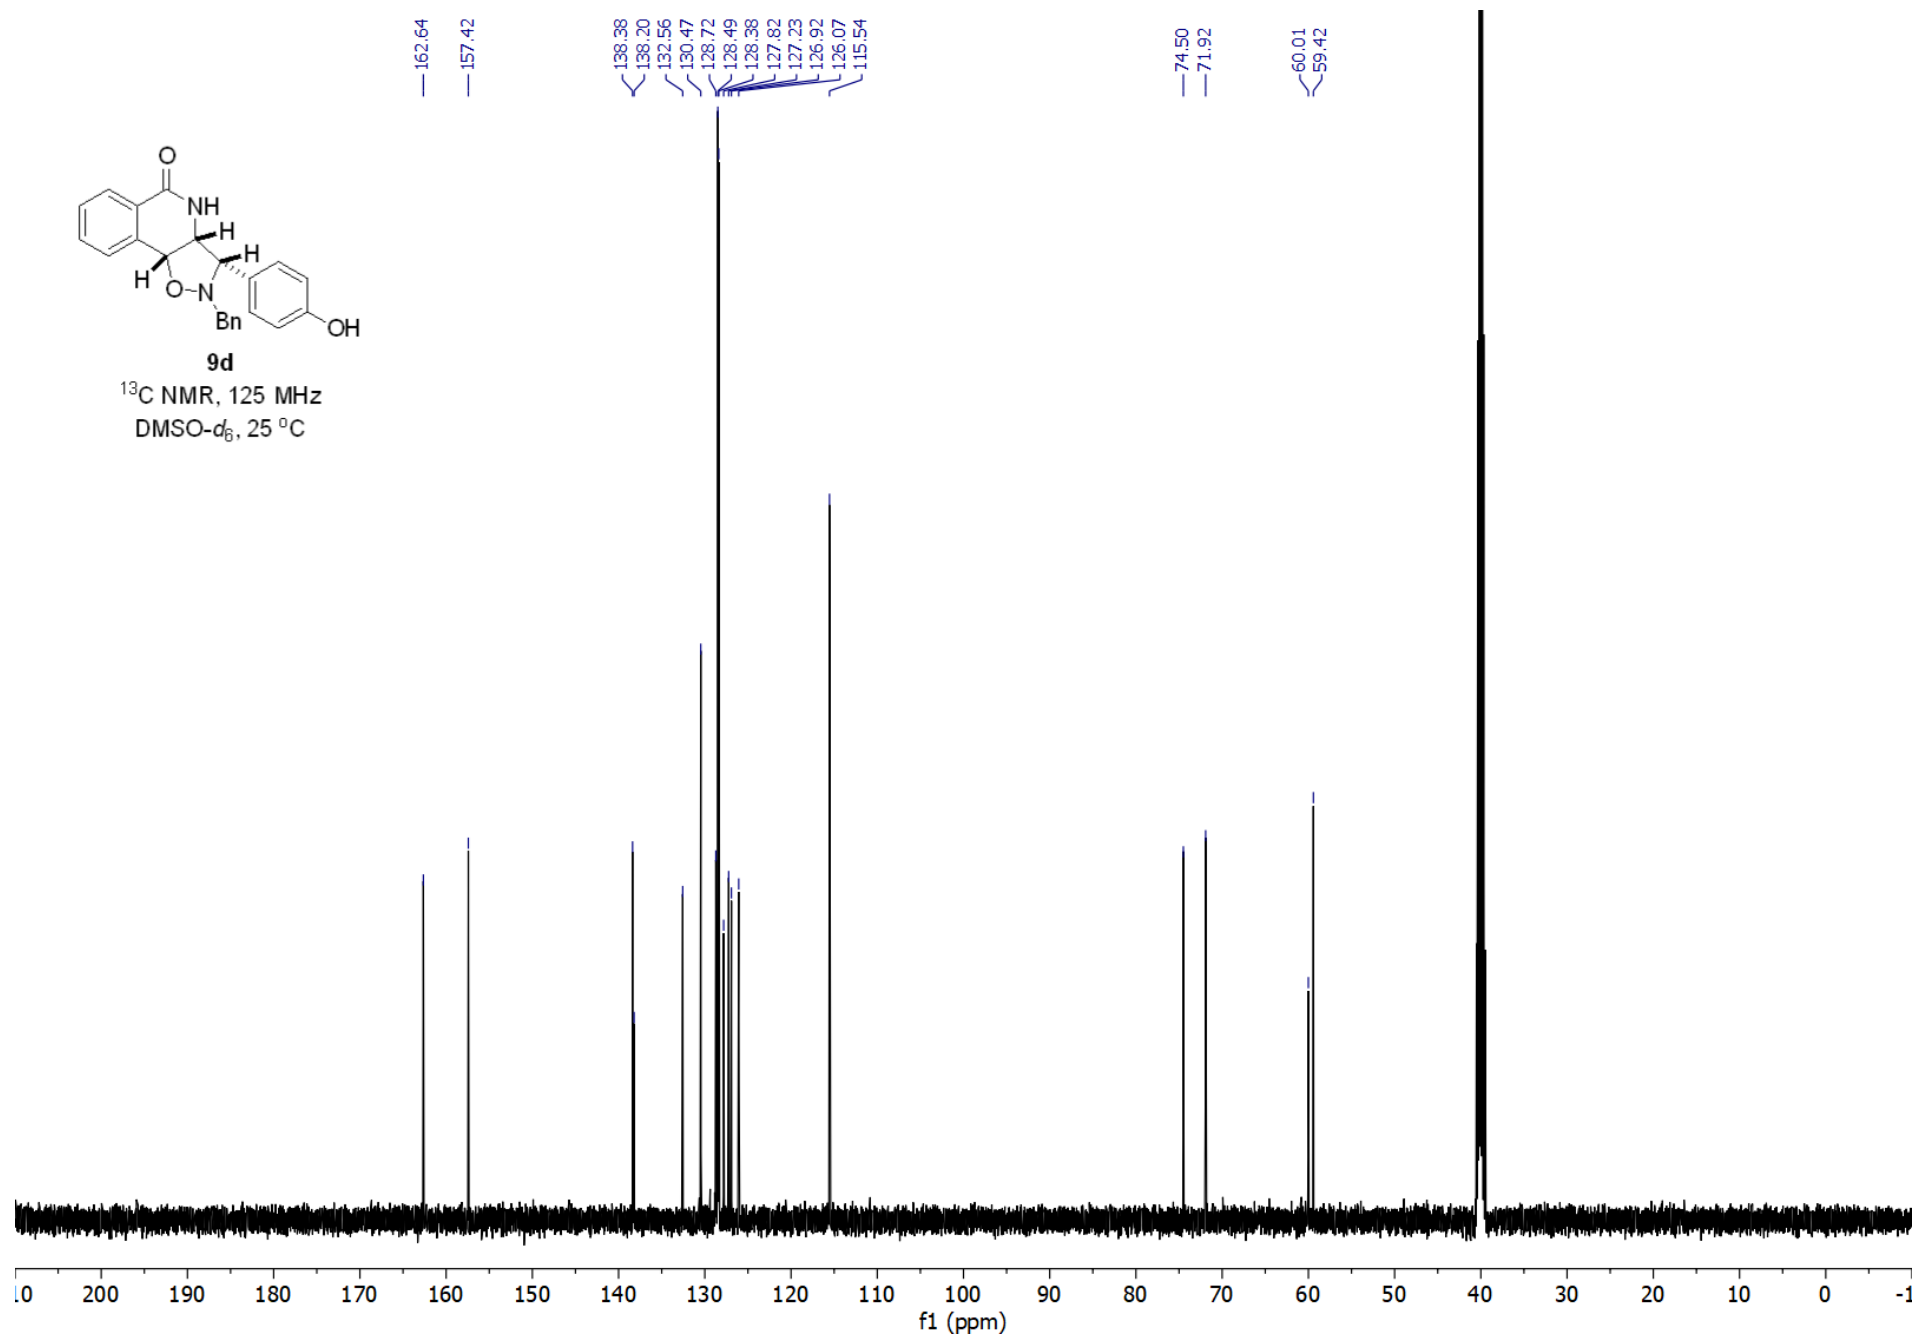

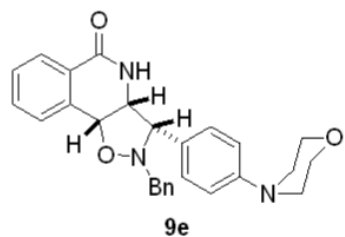

$^1\text{H}$  NMR, 500 MHz  
DMSO- $d_6$ , 25 °C

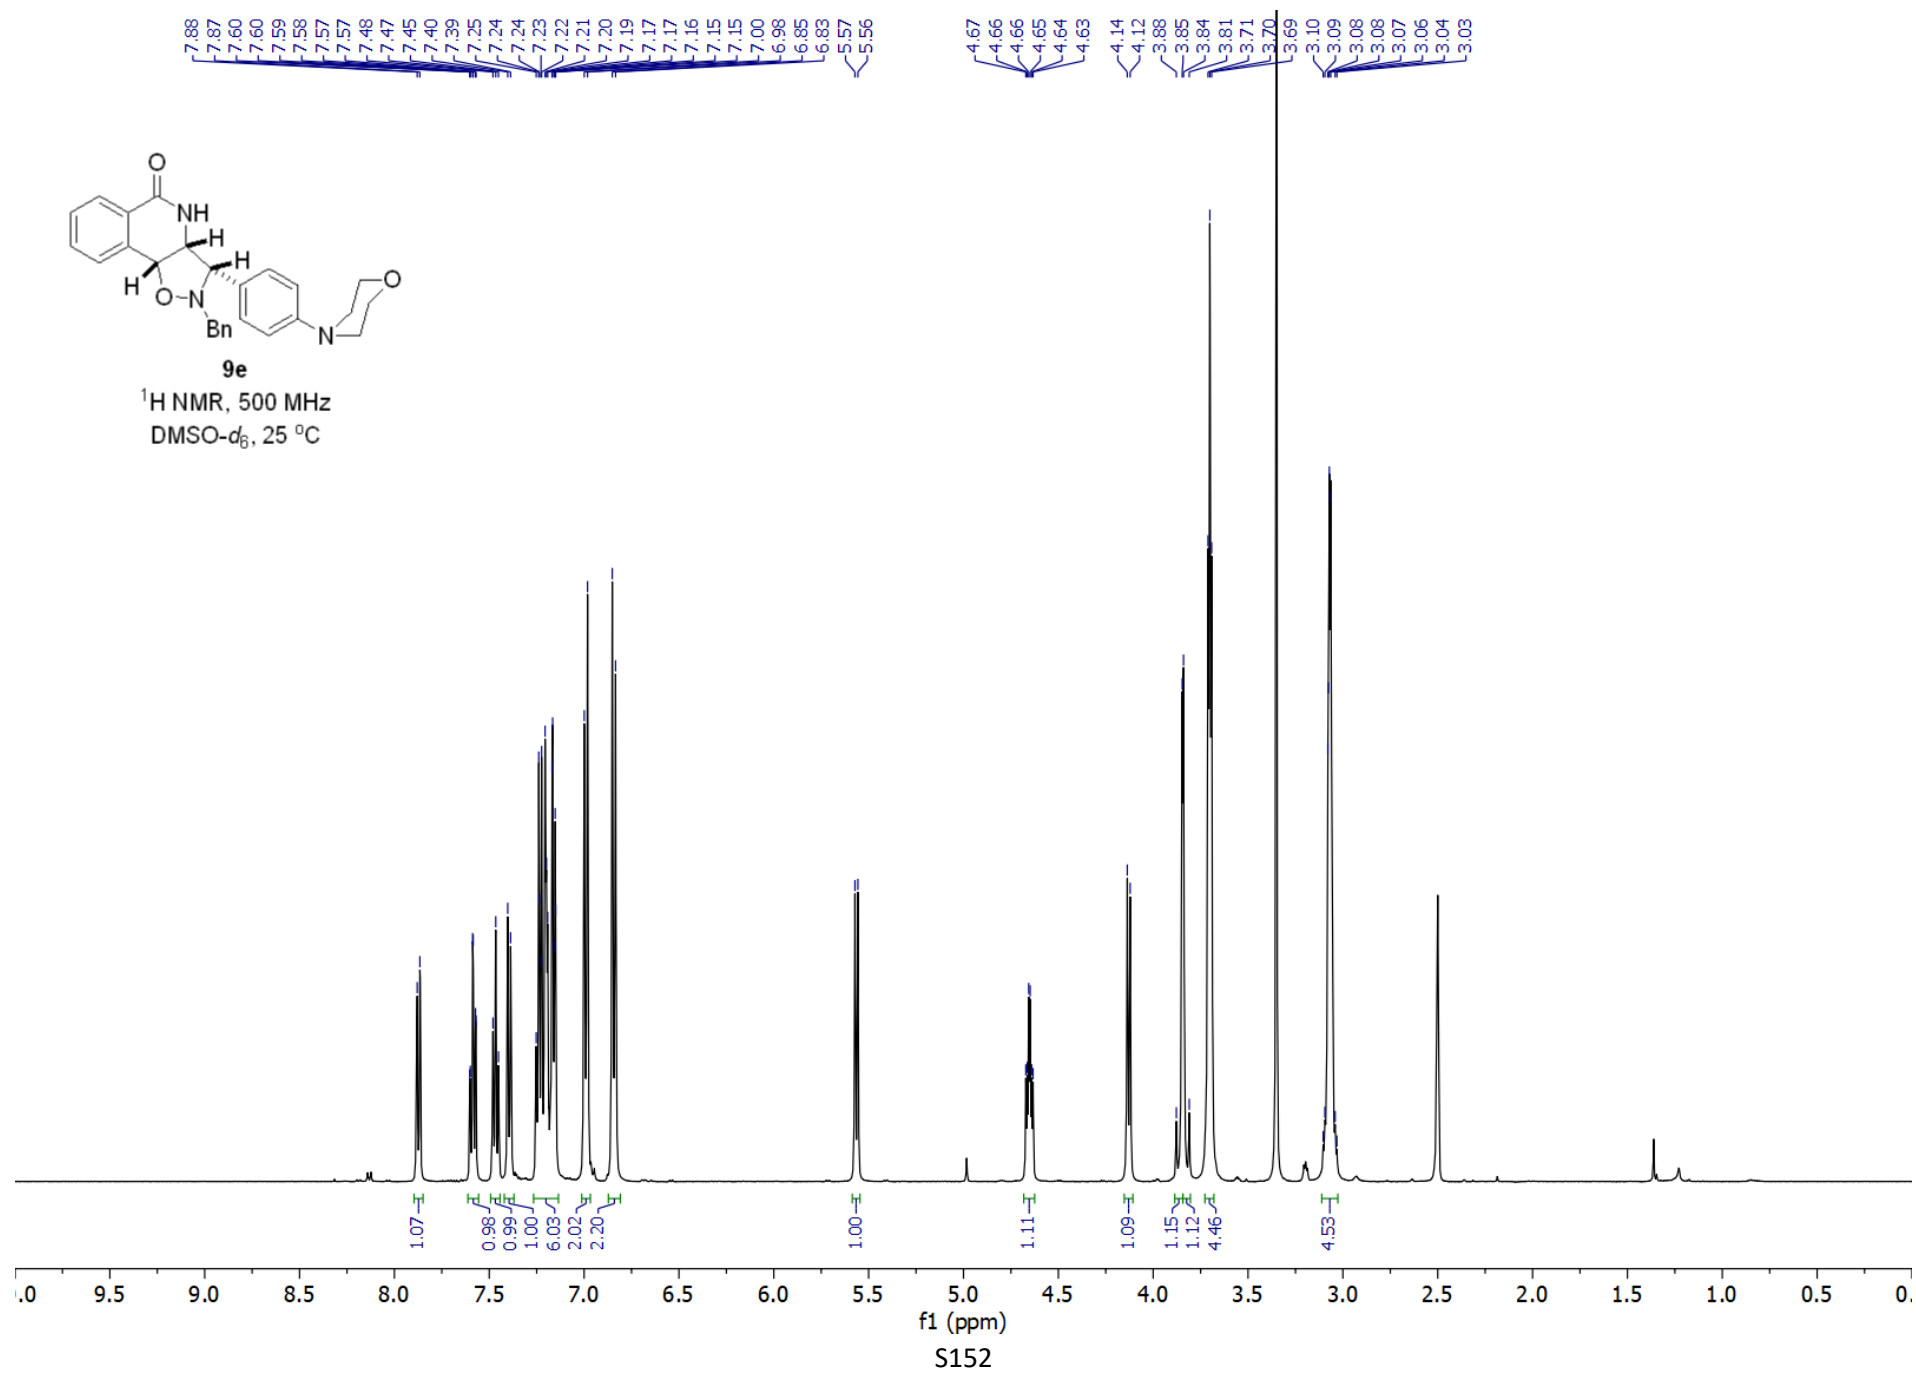

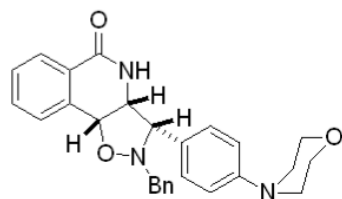

**9e**

$^{13}\text{C}$  NMR, 125 MHz  
DMSO- $d_6$ , 25  $^{\circ}\text{C}$

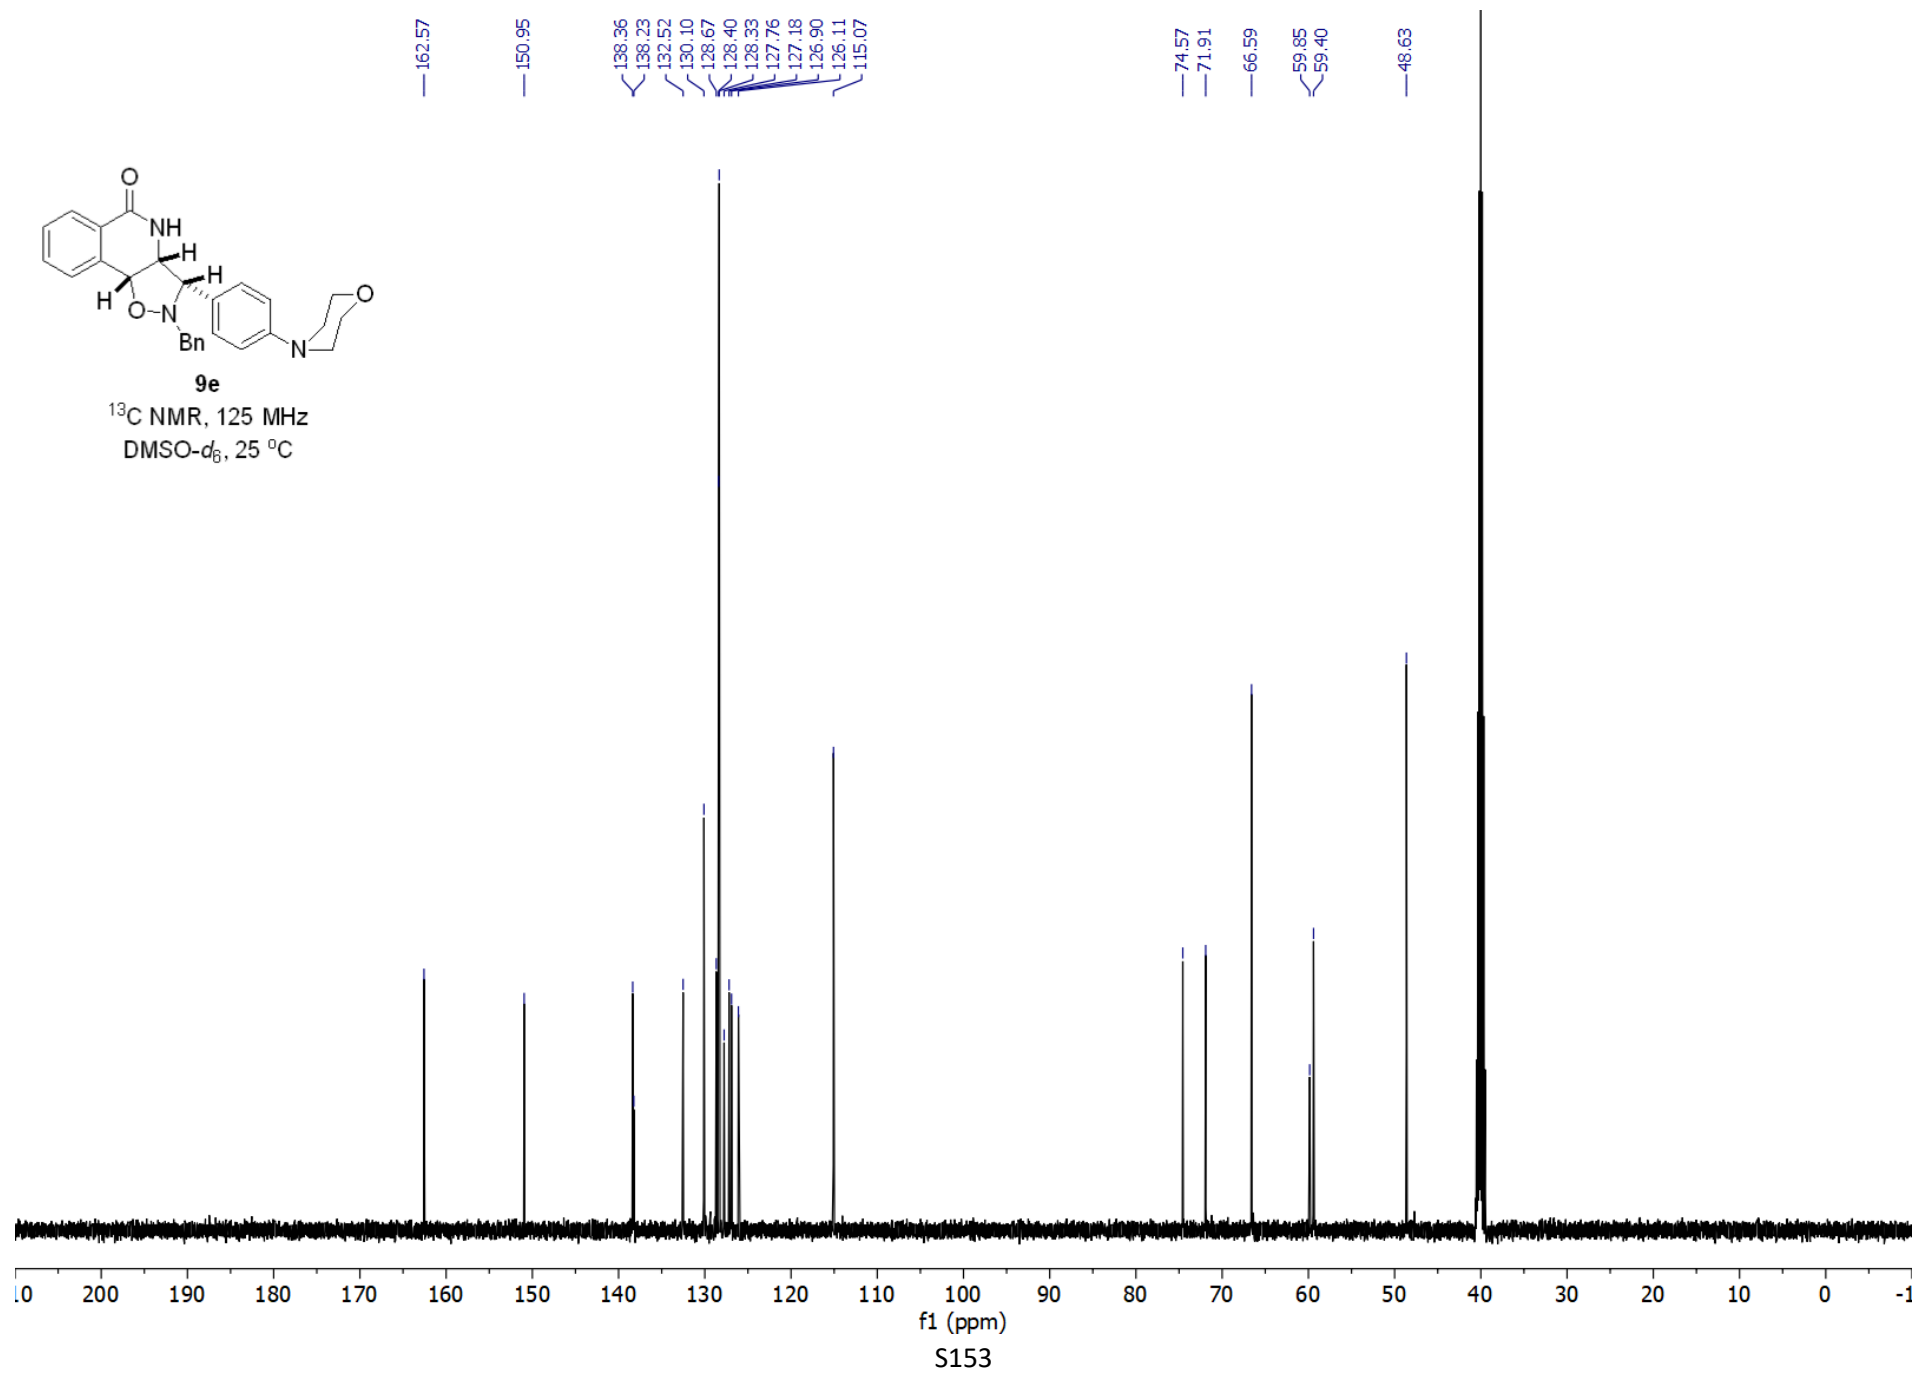

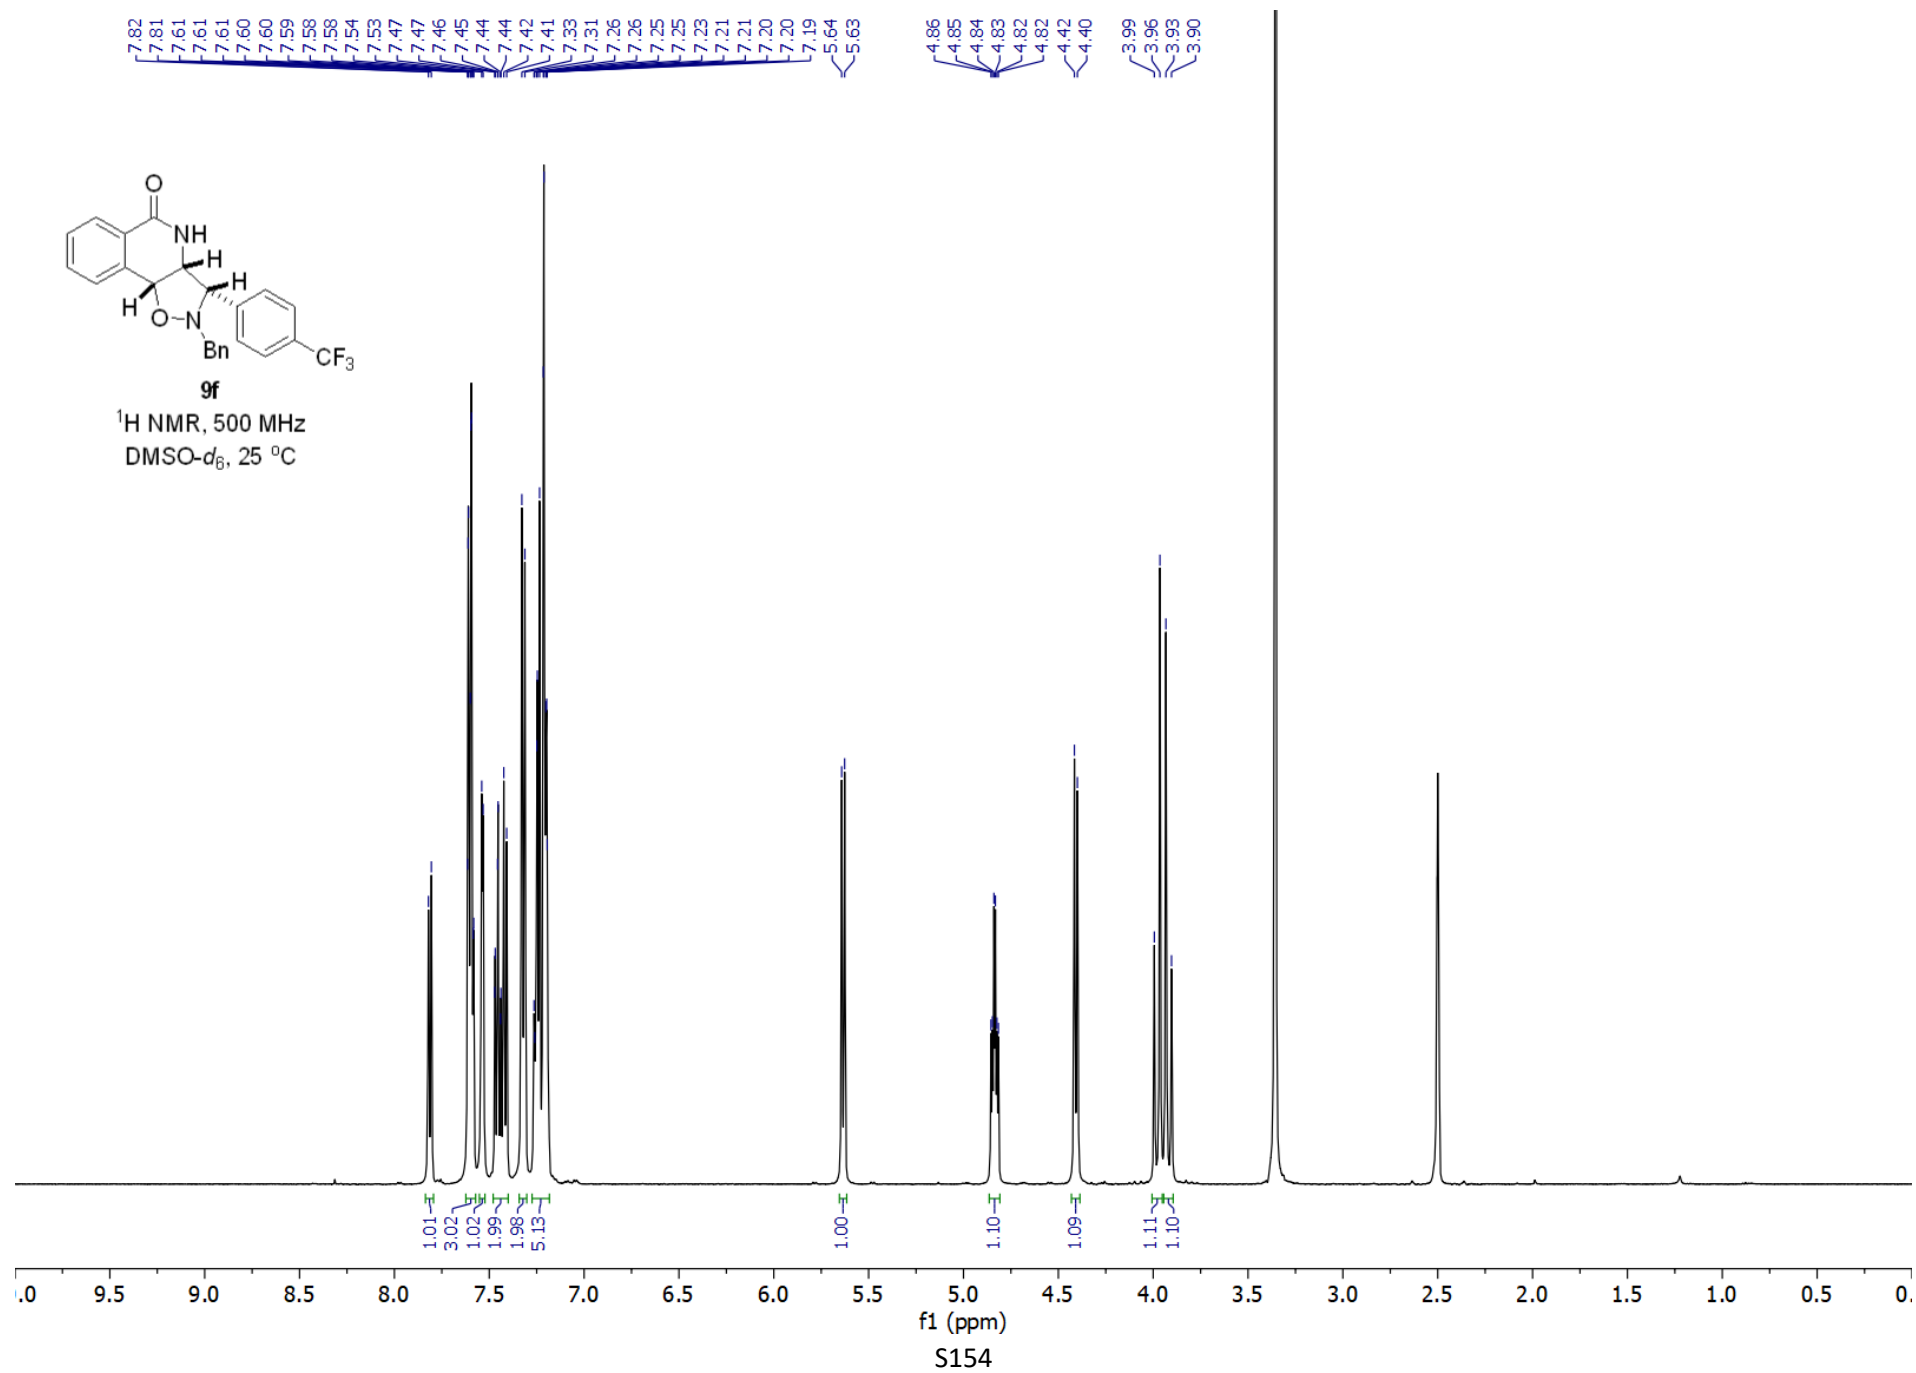

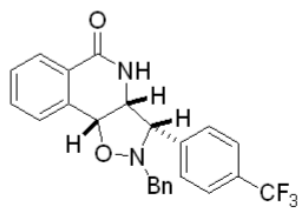

$^{13}\text{C}$  NMR, 125 MHz  
DMSO- $d_6$ , 25 °C

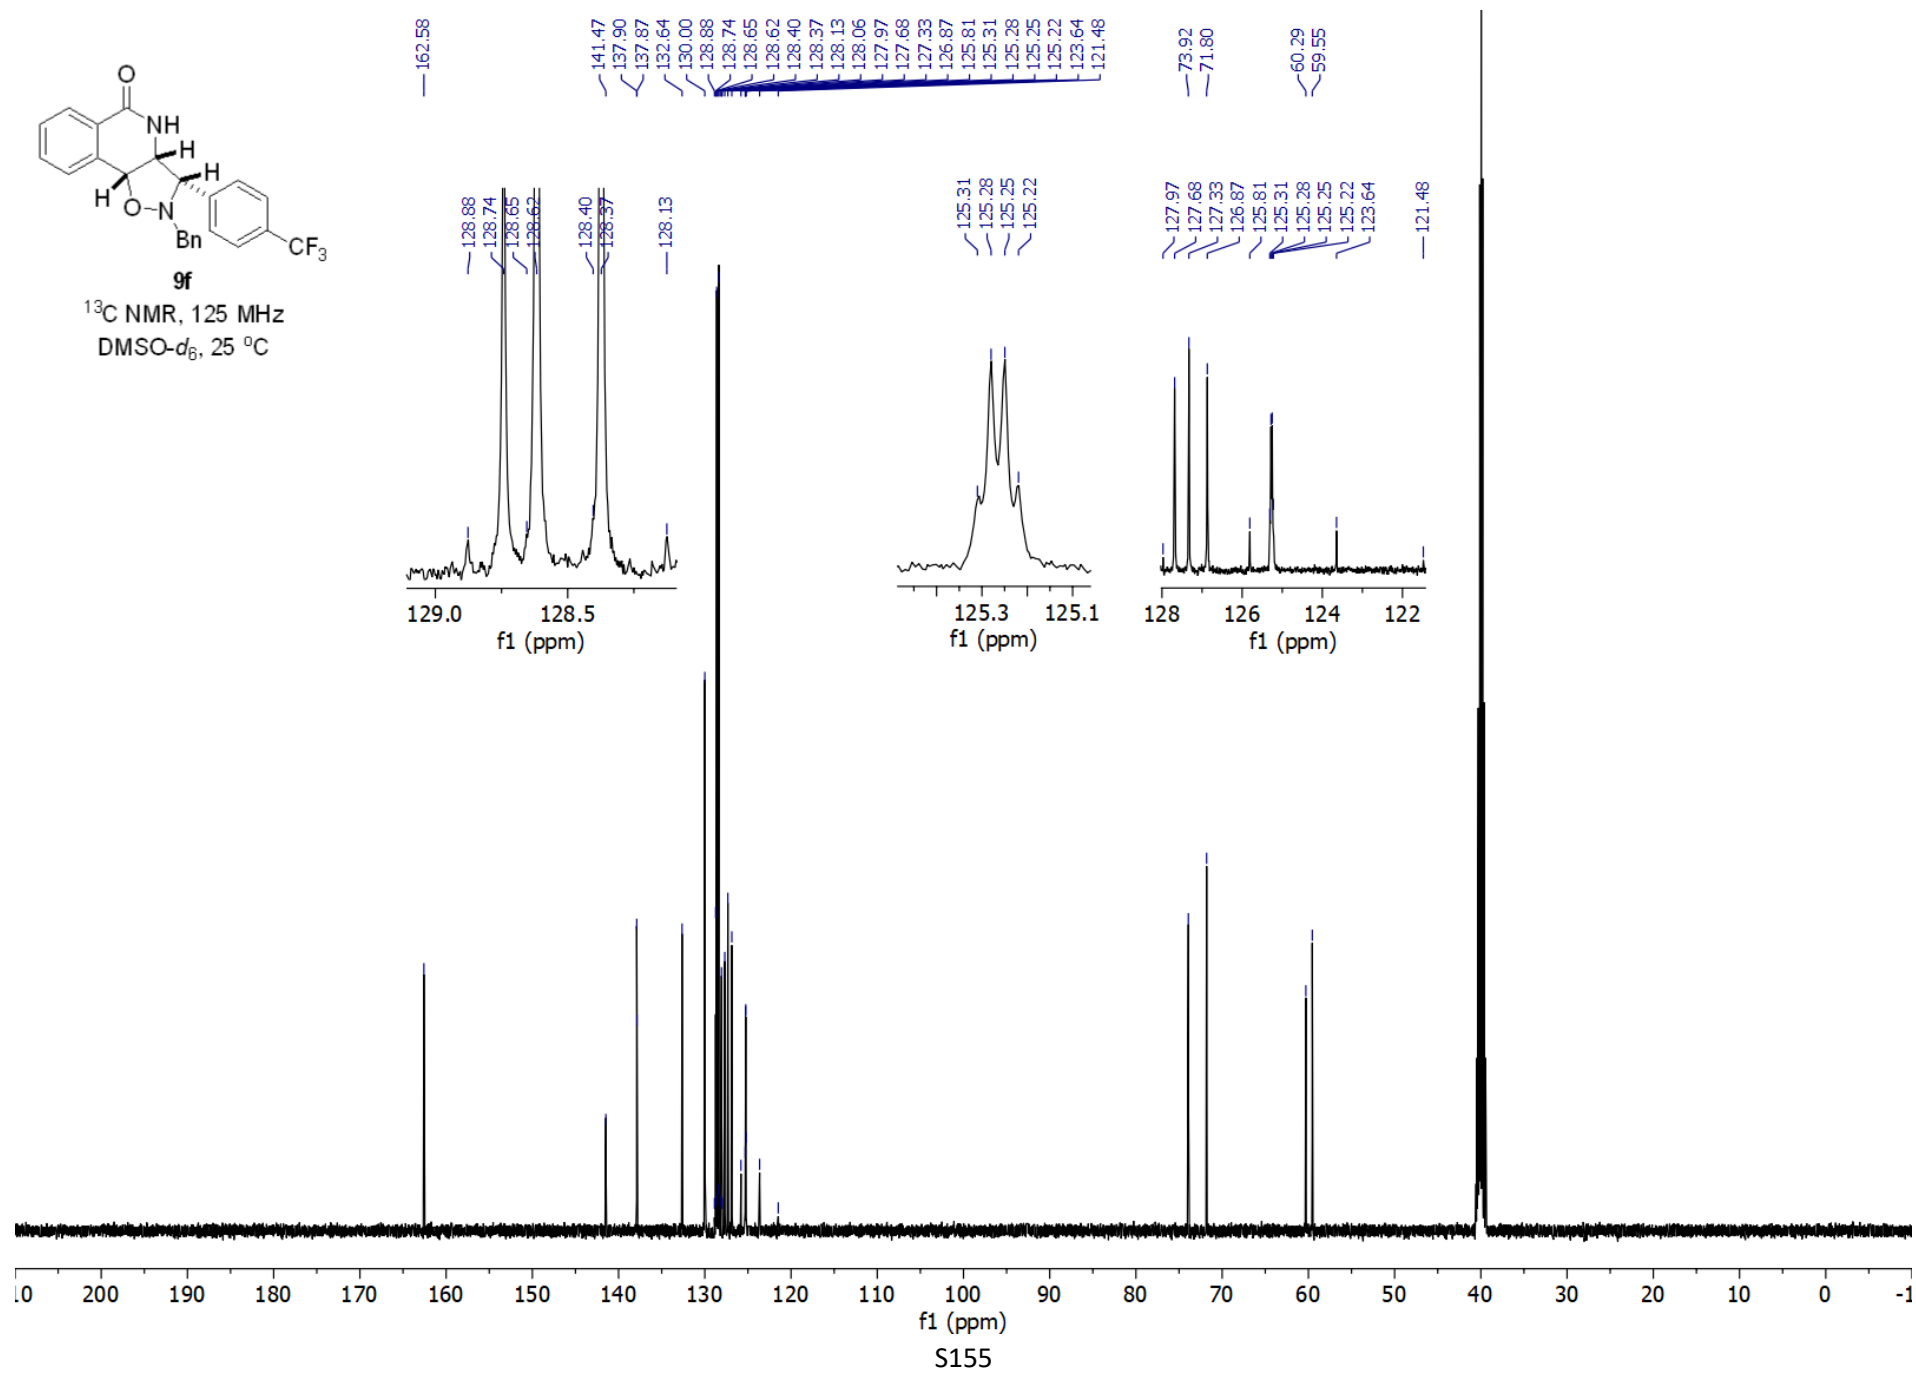

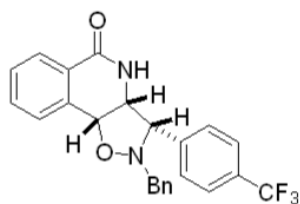

**9f**

$^{19}\text{F}$  NMR, 470 MHz  
DMSO- $d_6$ , 25  $^{\circ}\text{C}$

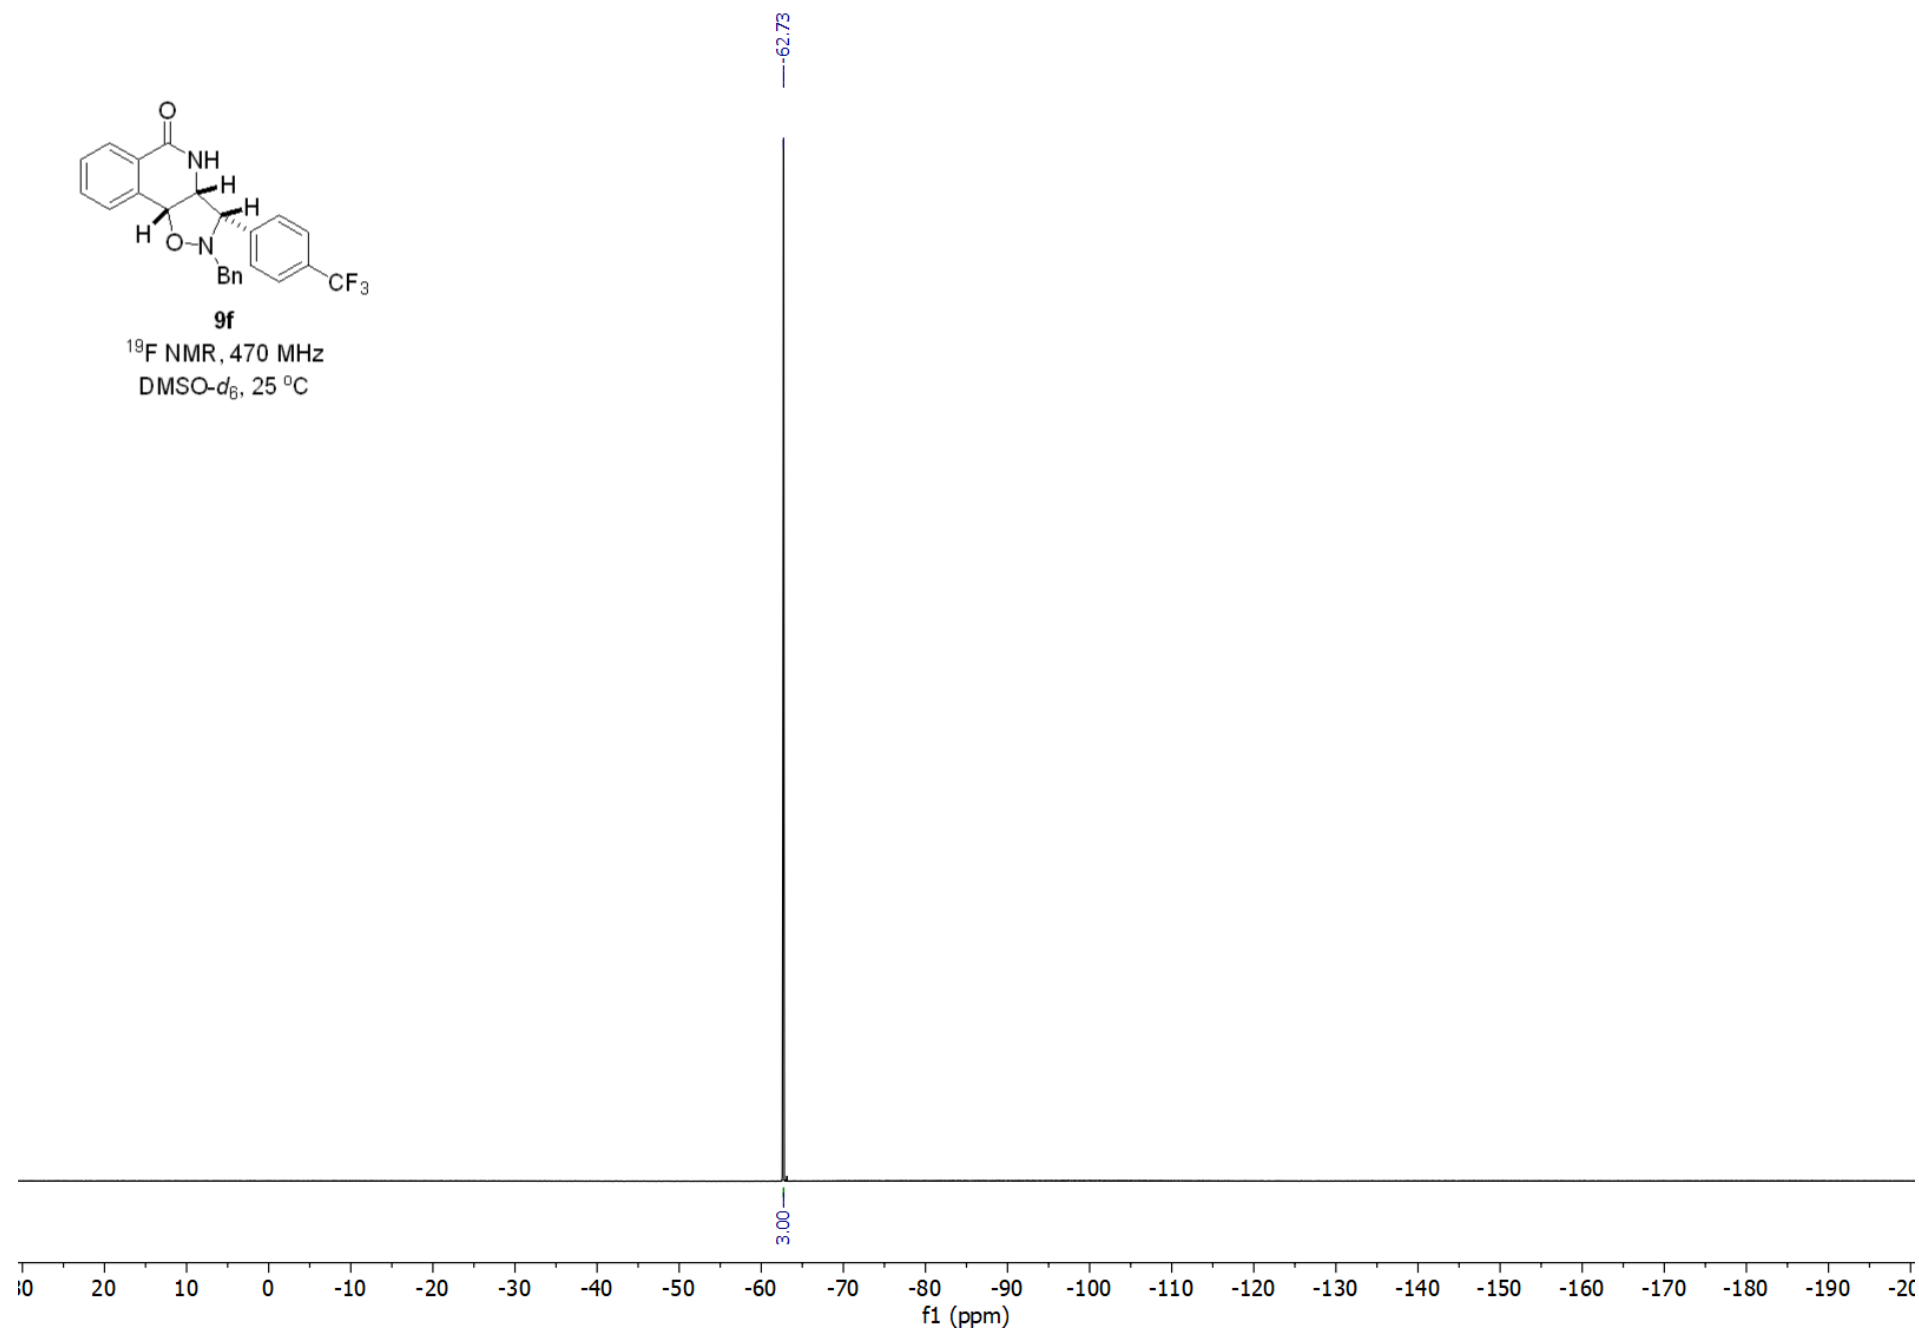

S156

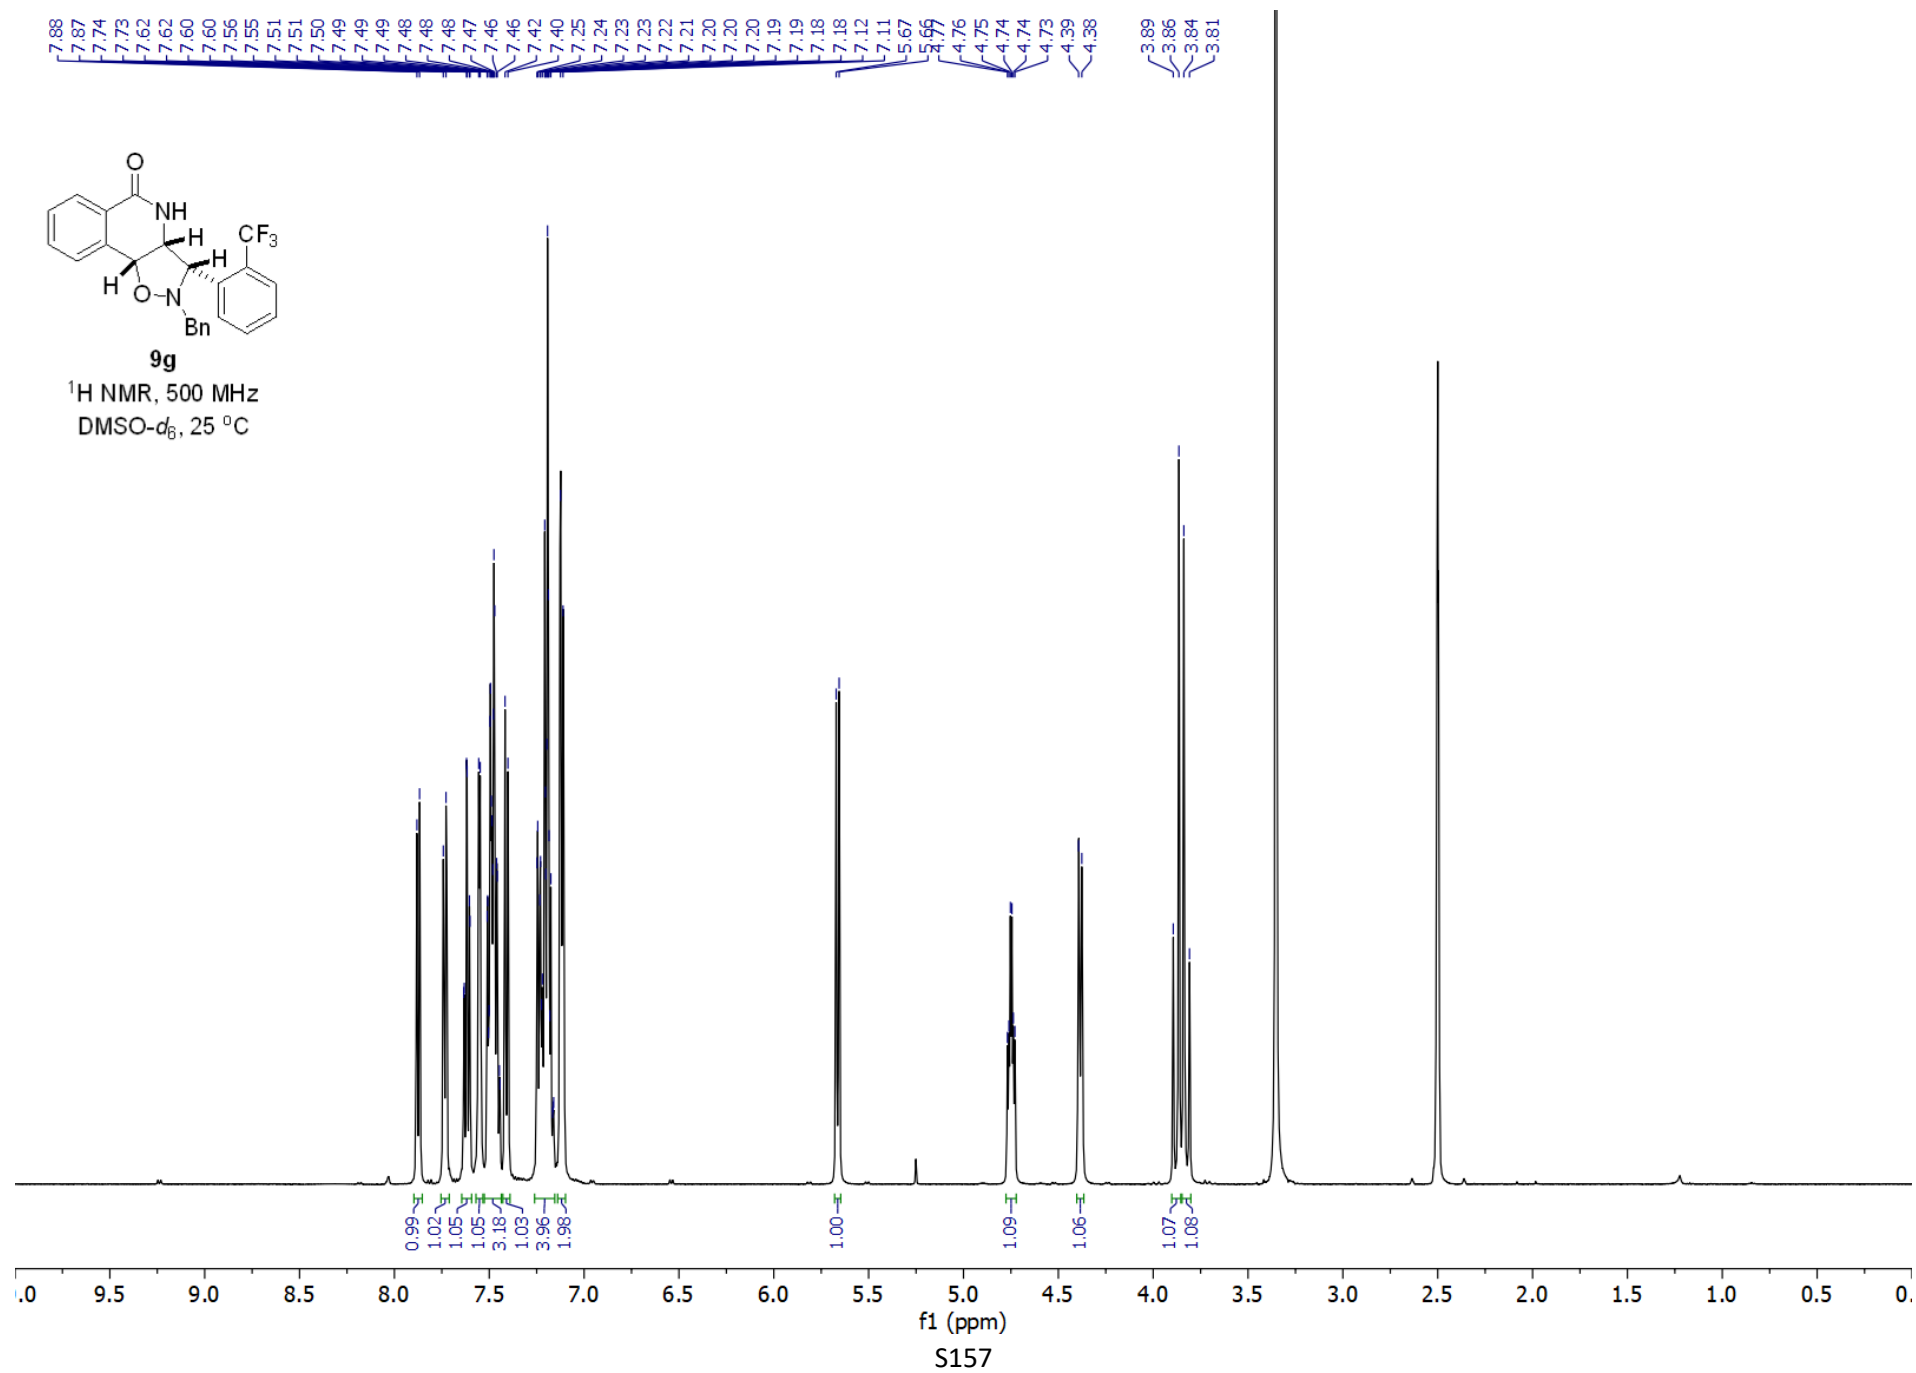

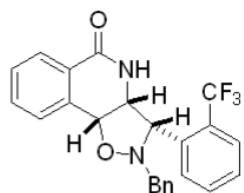

**9g**  
 $^{13}\text{C}$  NMR, 125 MHz  
 DMSO- $d_6$ , 25 °C

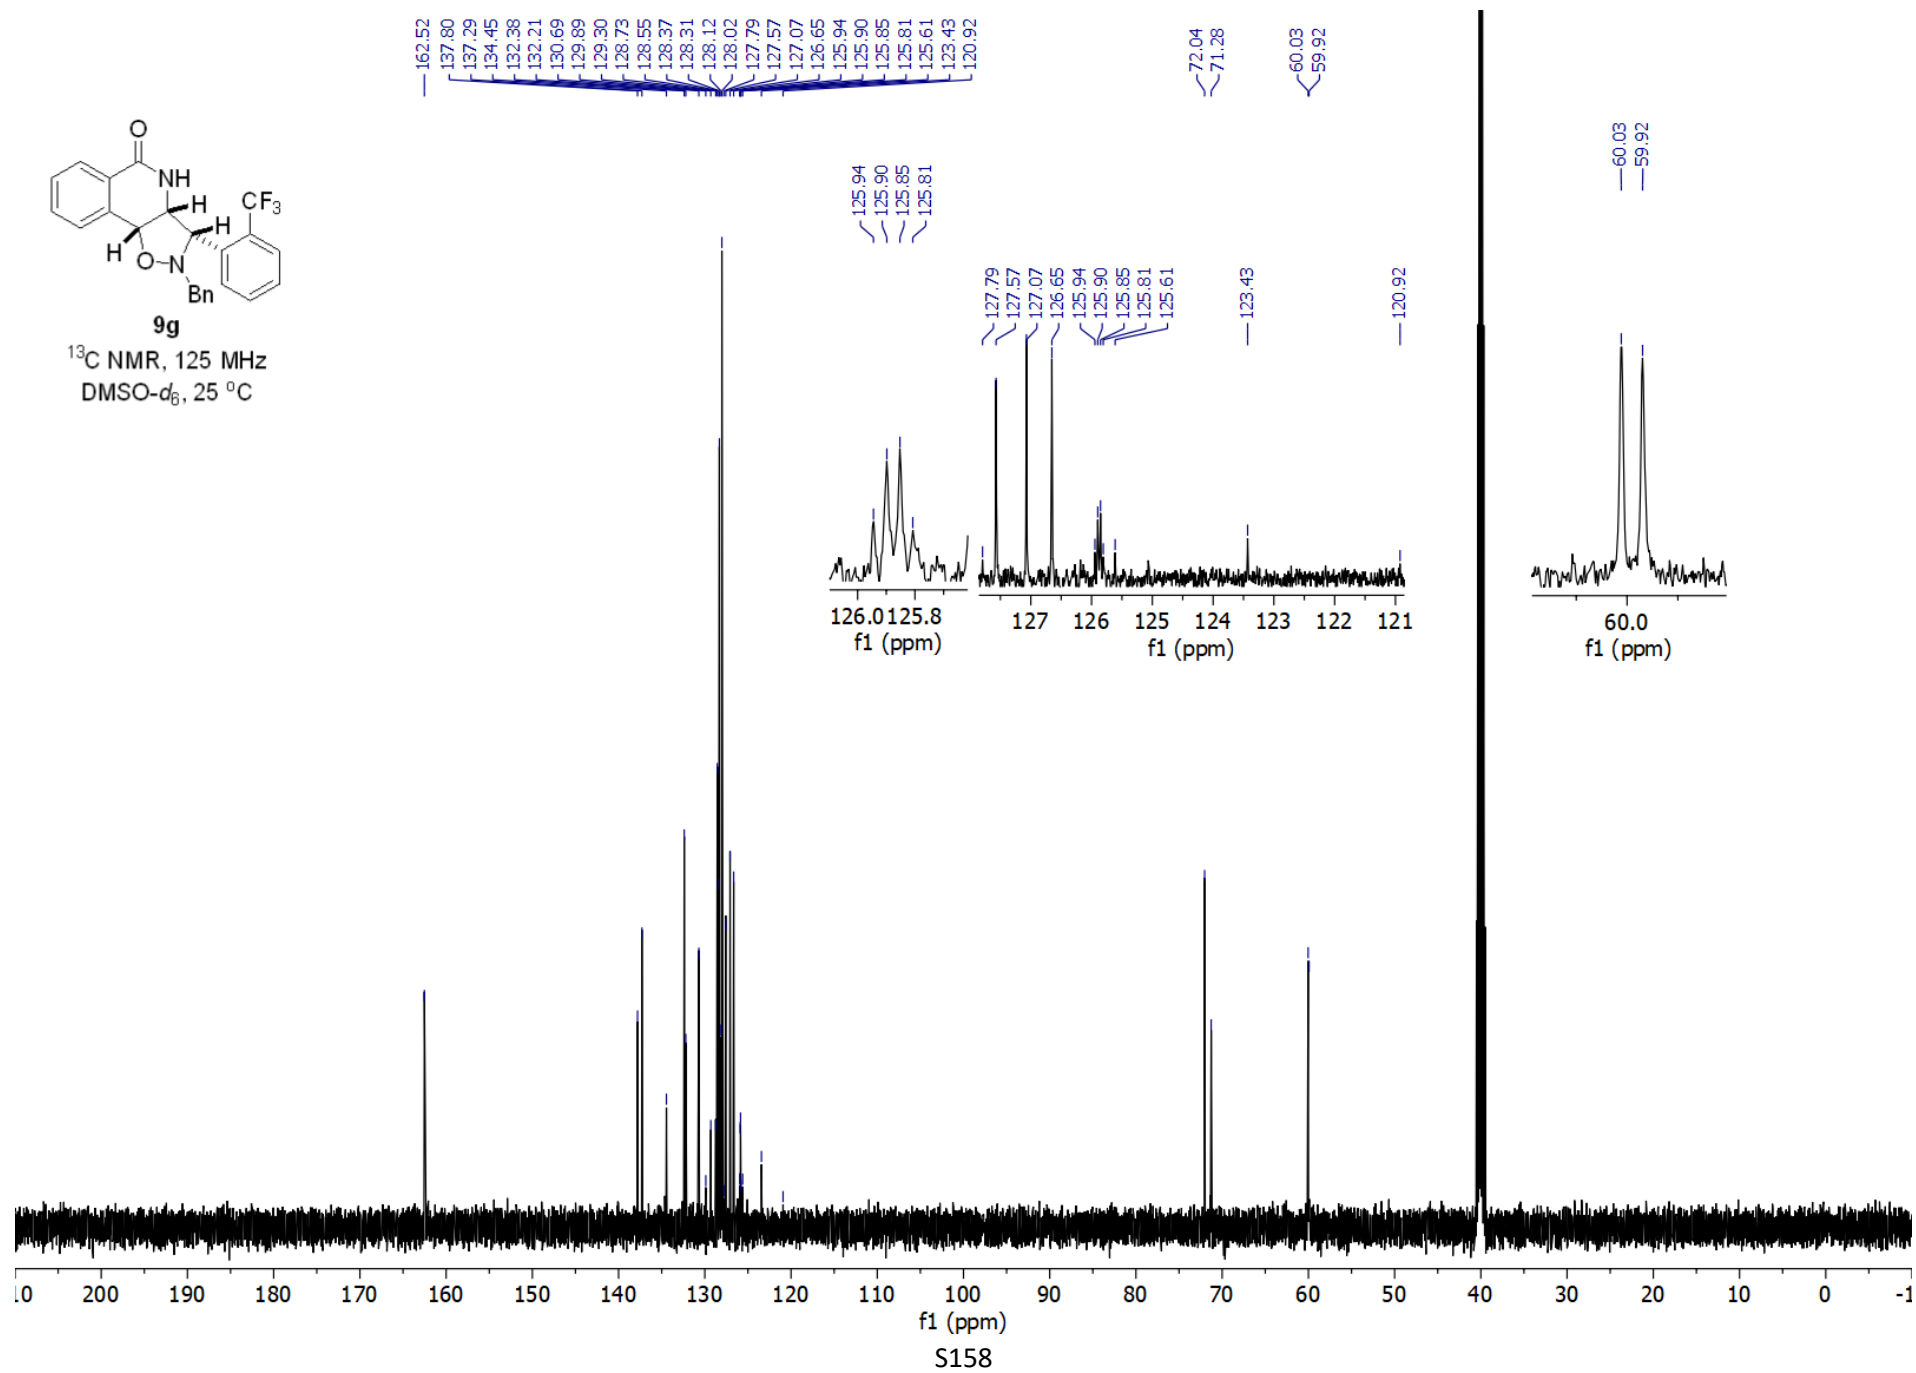

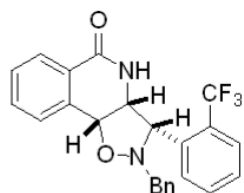

**9g**

$^{19}\text{F}$  NMR, 470 MHz  
DMSO- $d_6$ , 25 °C

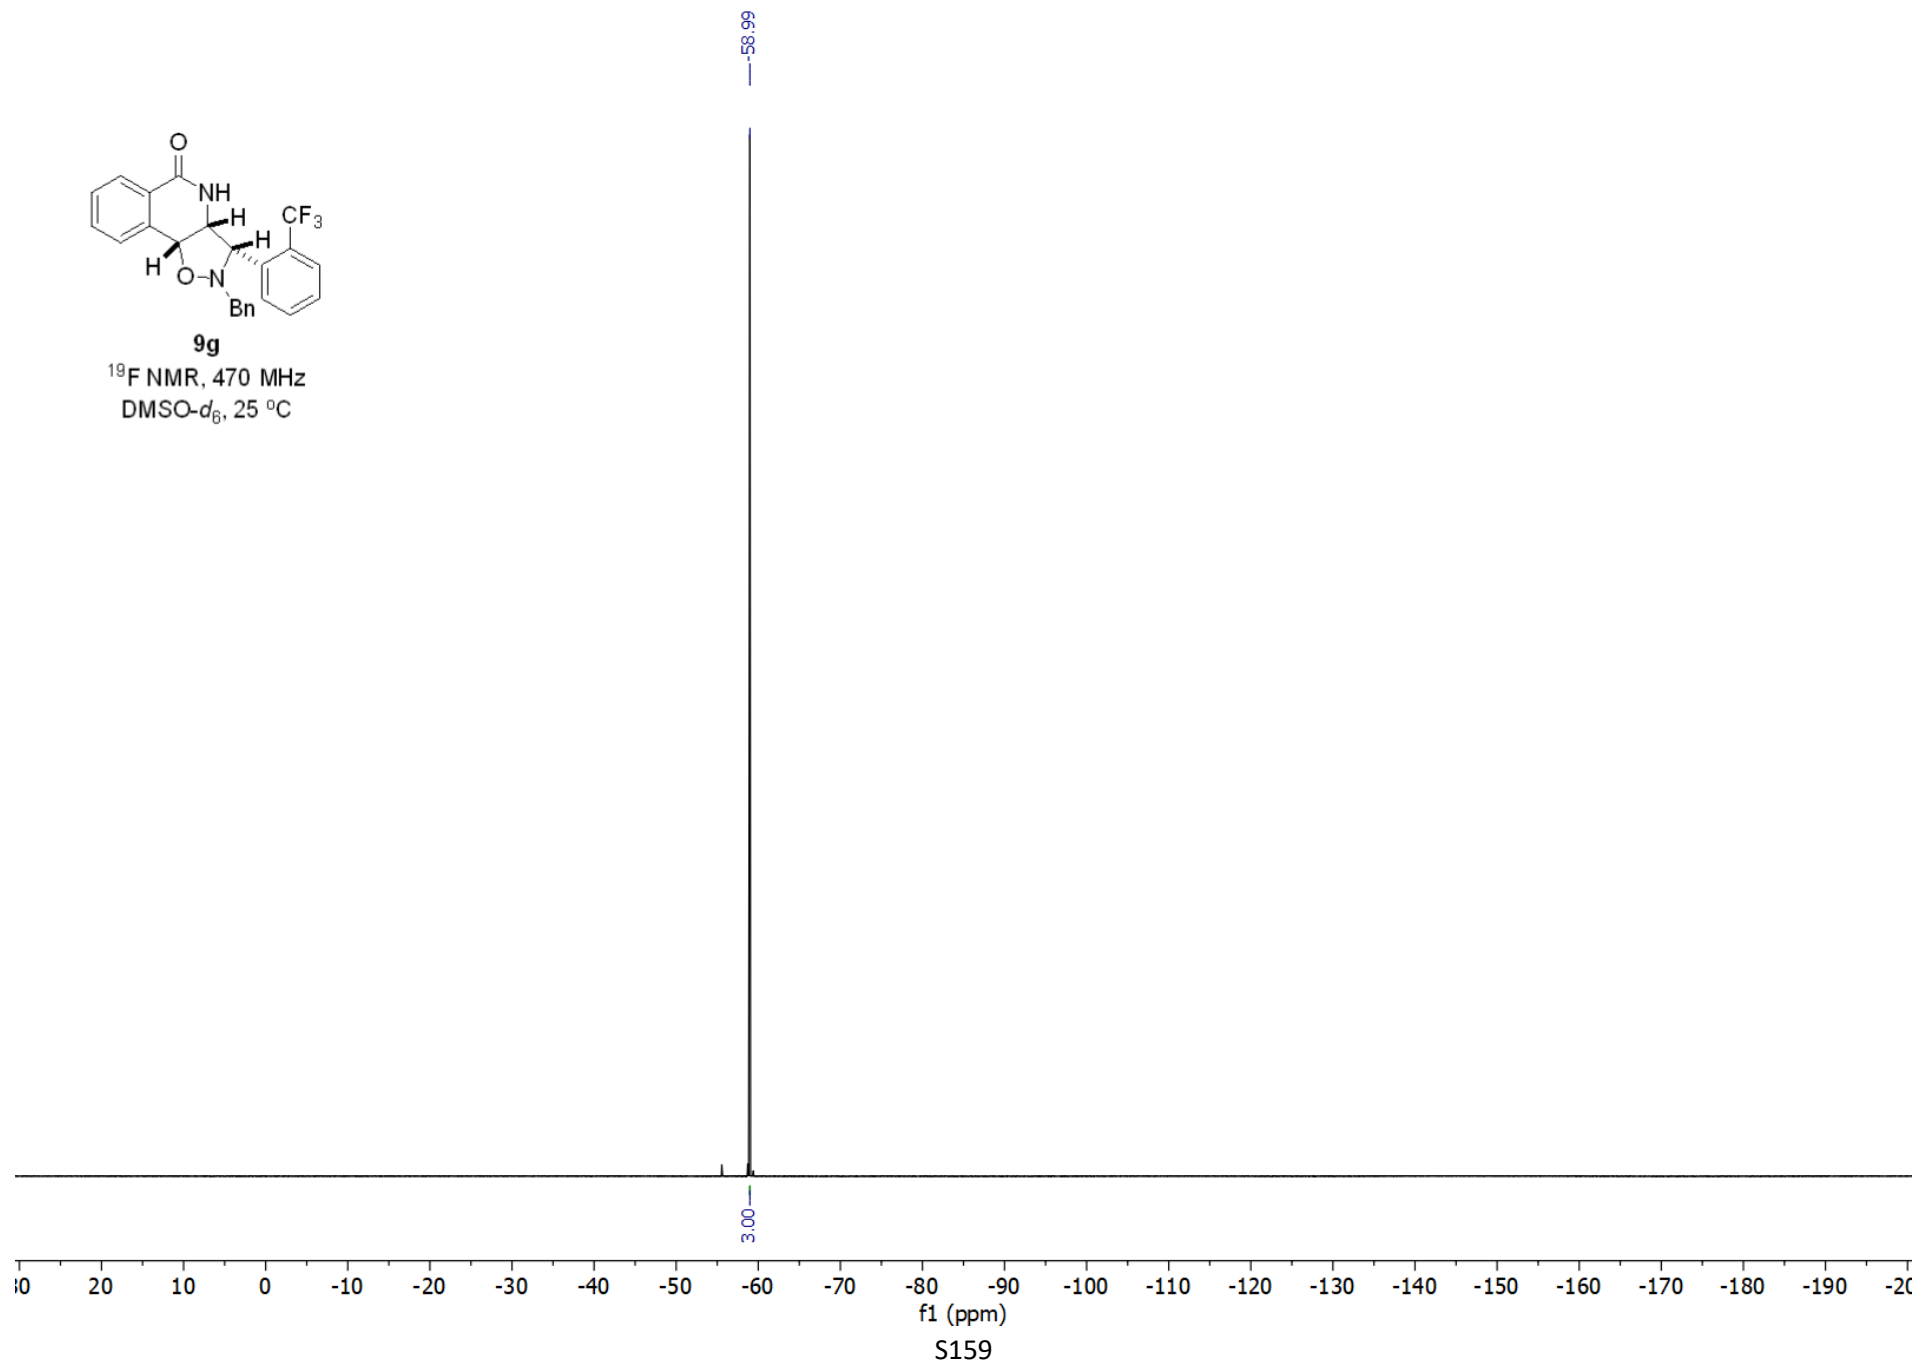

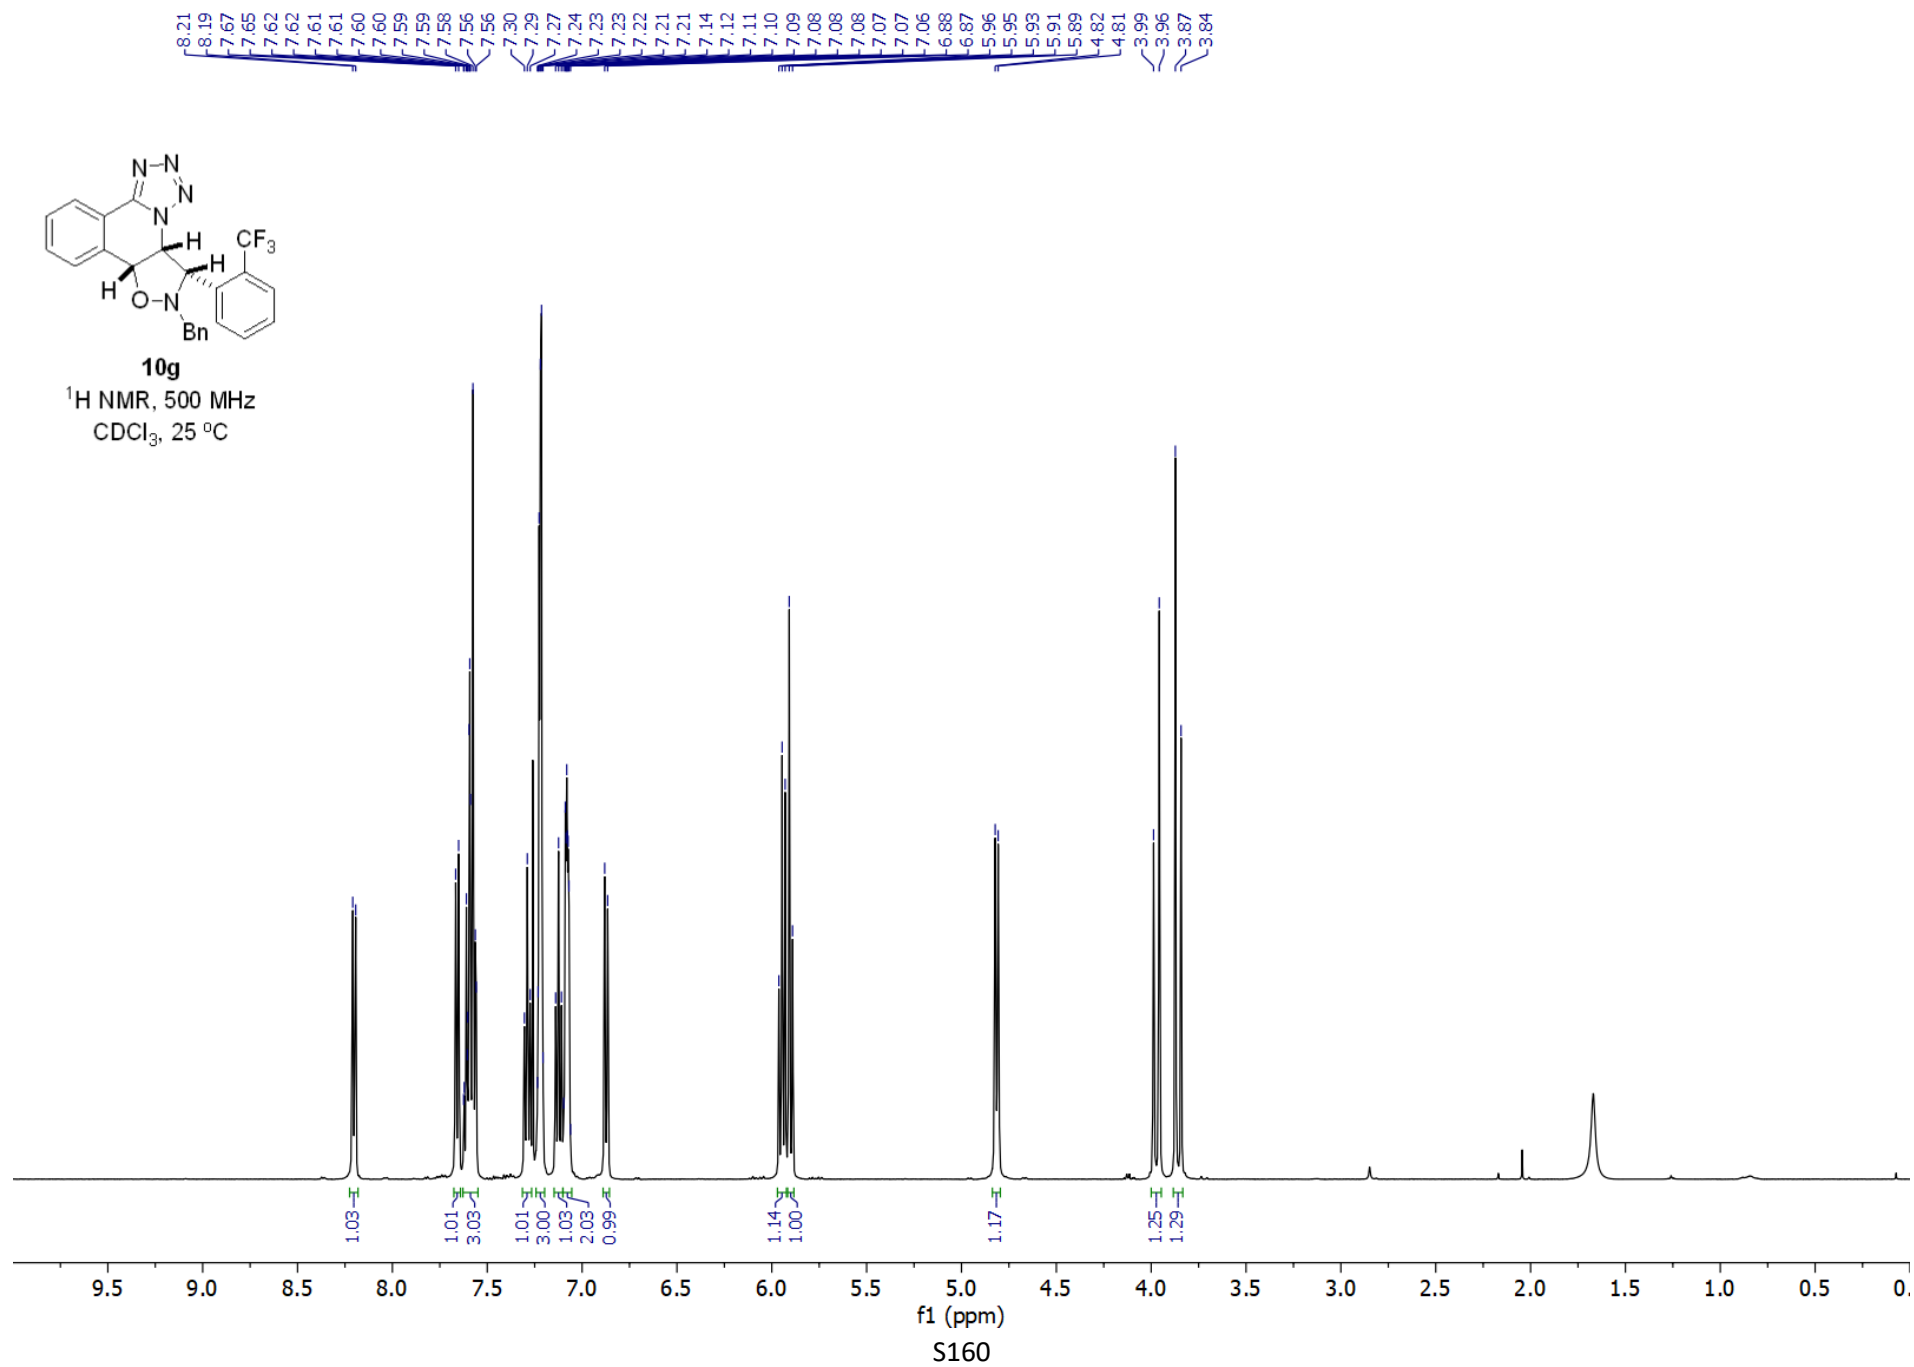

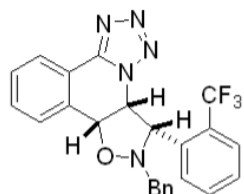

**10g**

$^{13}\text{C}$  NMR, 125 MHz  
 $\text{CDCl}_3$ , 25  $^\circ\text{C}$

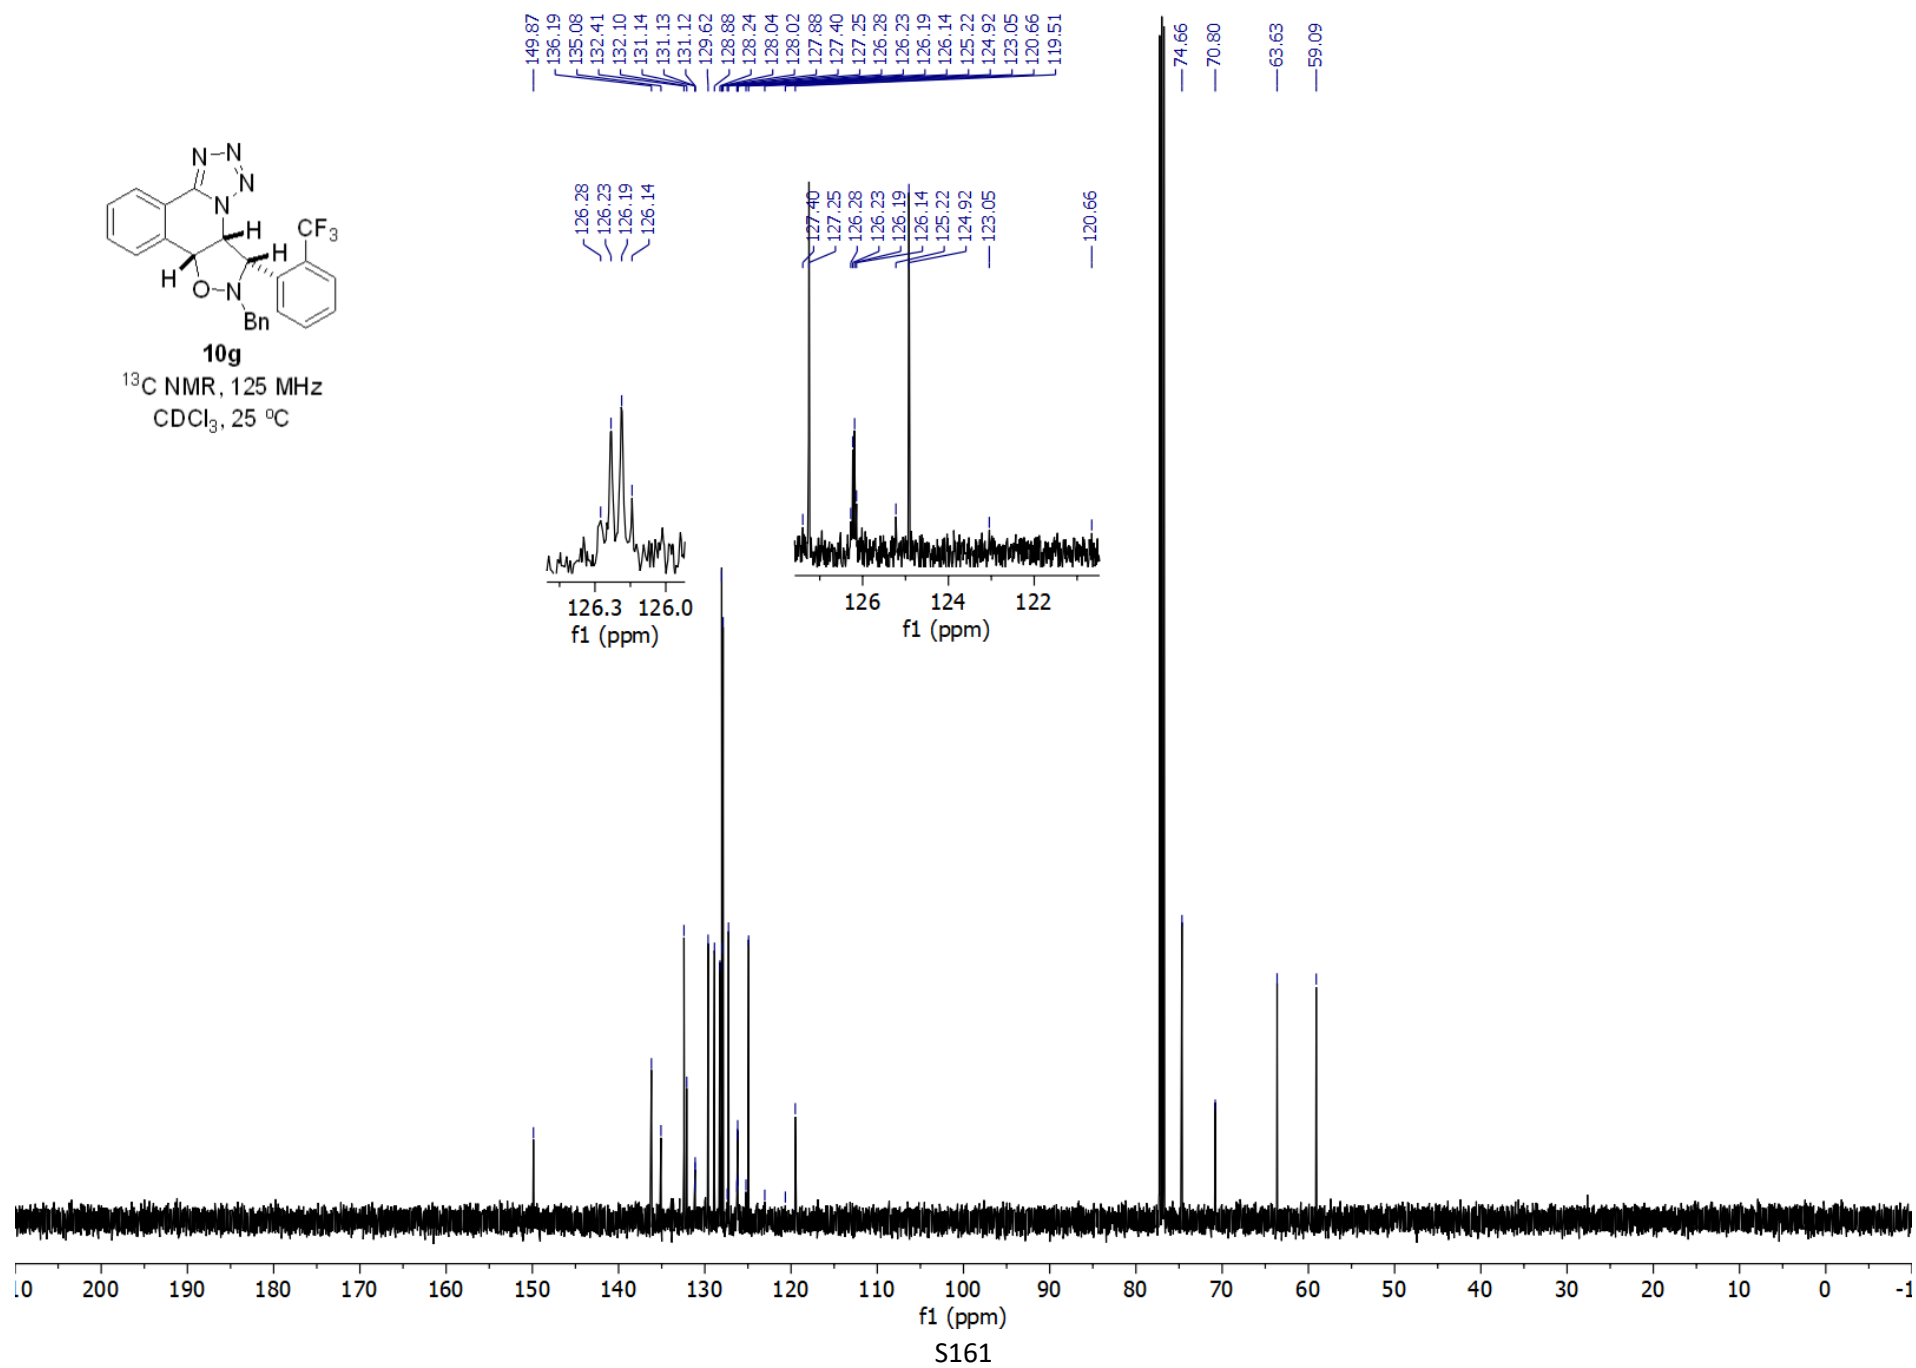

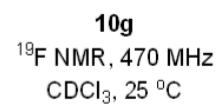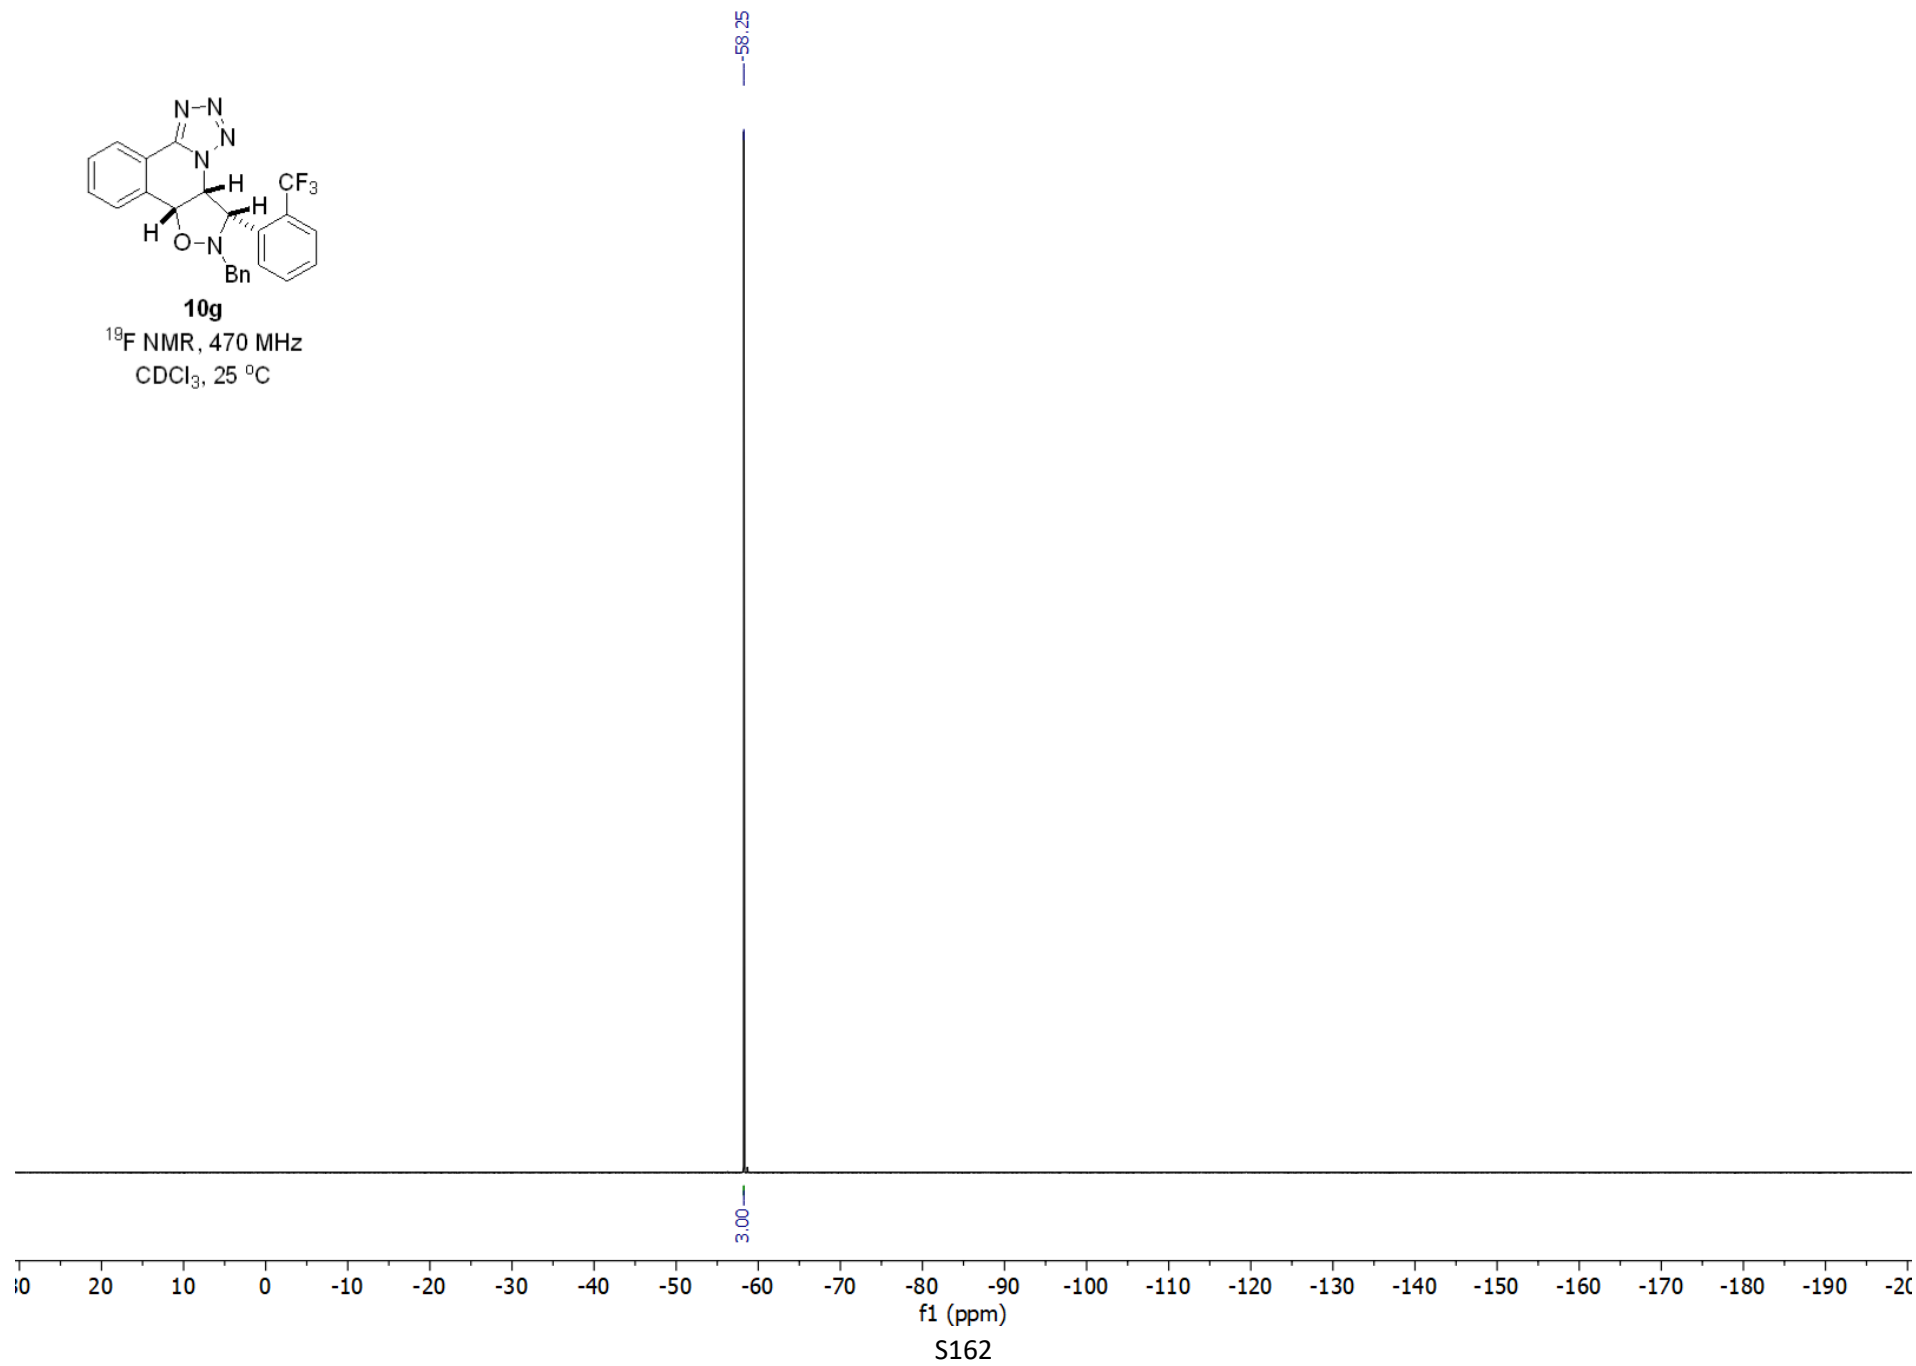

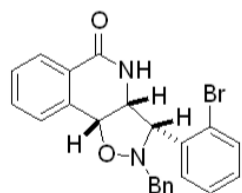

**9h**

$^1\text{H}$  NMR, 500 MHz  
DMSO- $d_6$ , 25  $^\circ\text{C}$

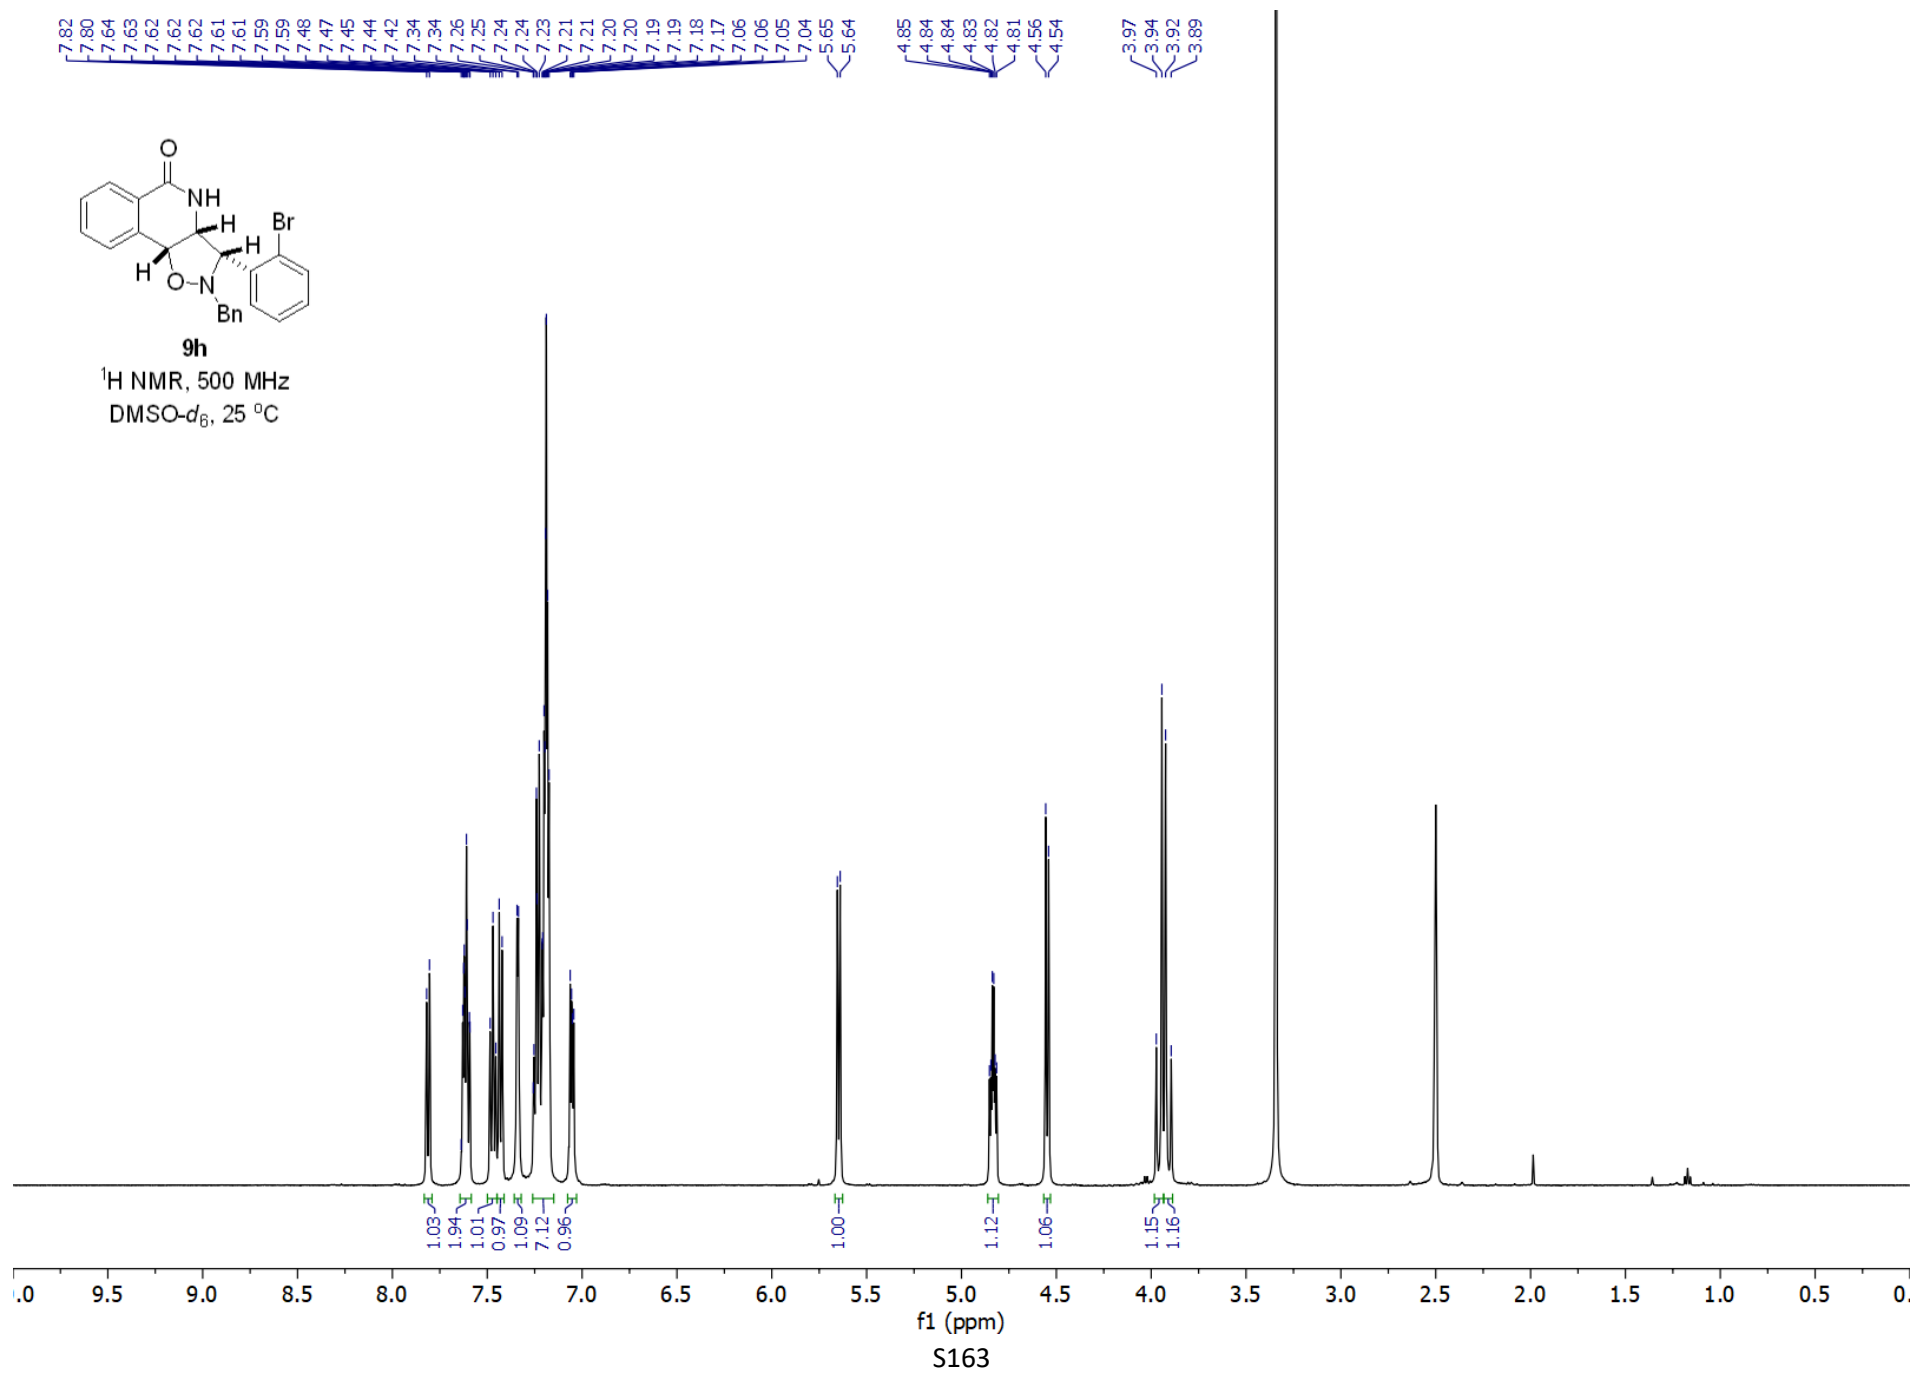

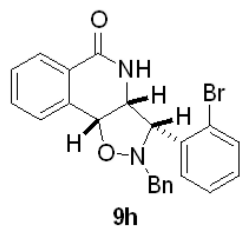

$^{13}\text{C}$  NMR, 125 MHz  
DMSO- $d_6$ , 25  $^{\circ}\text{C}$

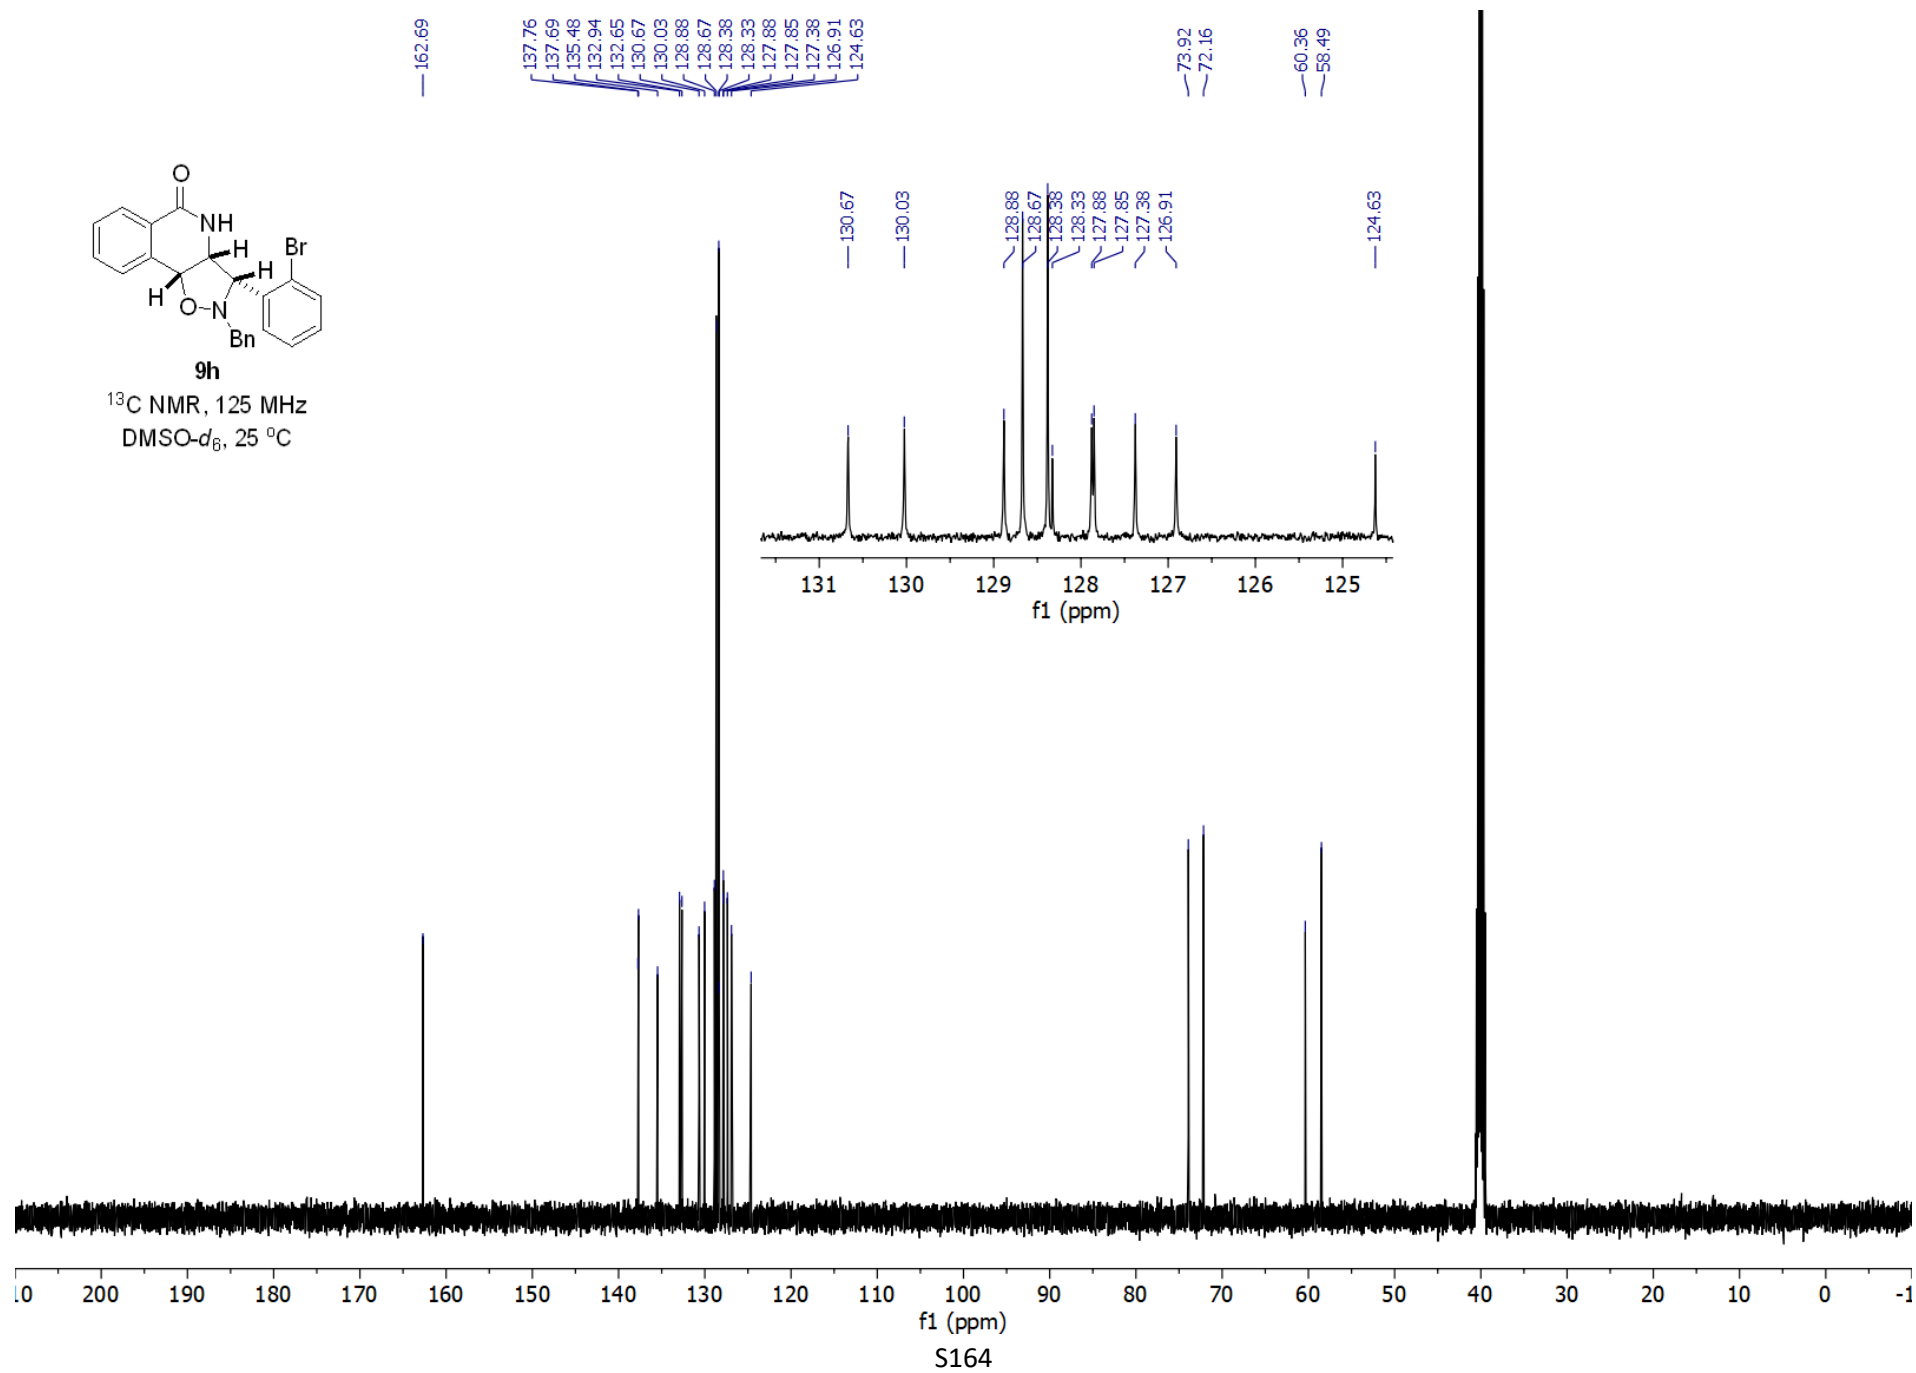

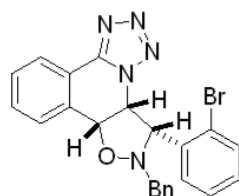

**10h**

$^1\text{H}$  NMR, 500 MHz  
 $\text{CDCl}_3$ , 25  $^\circ\text{C}$

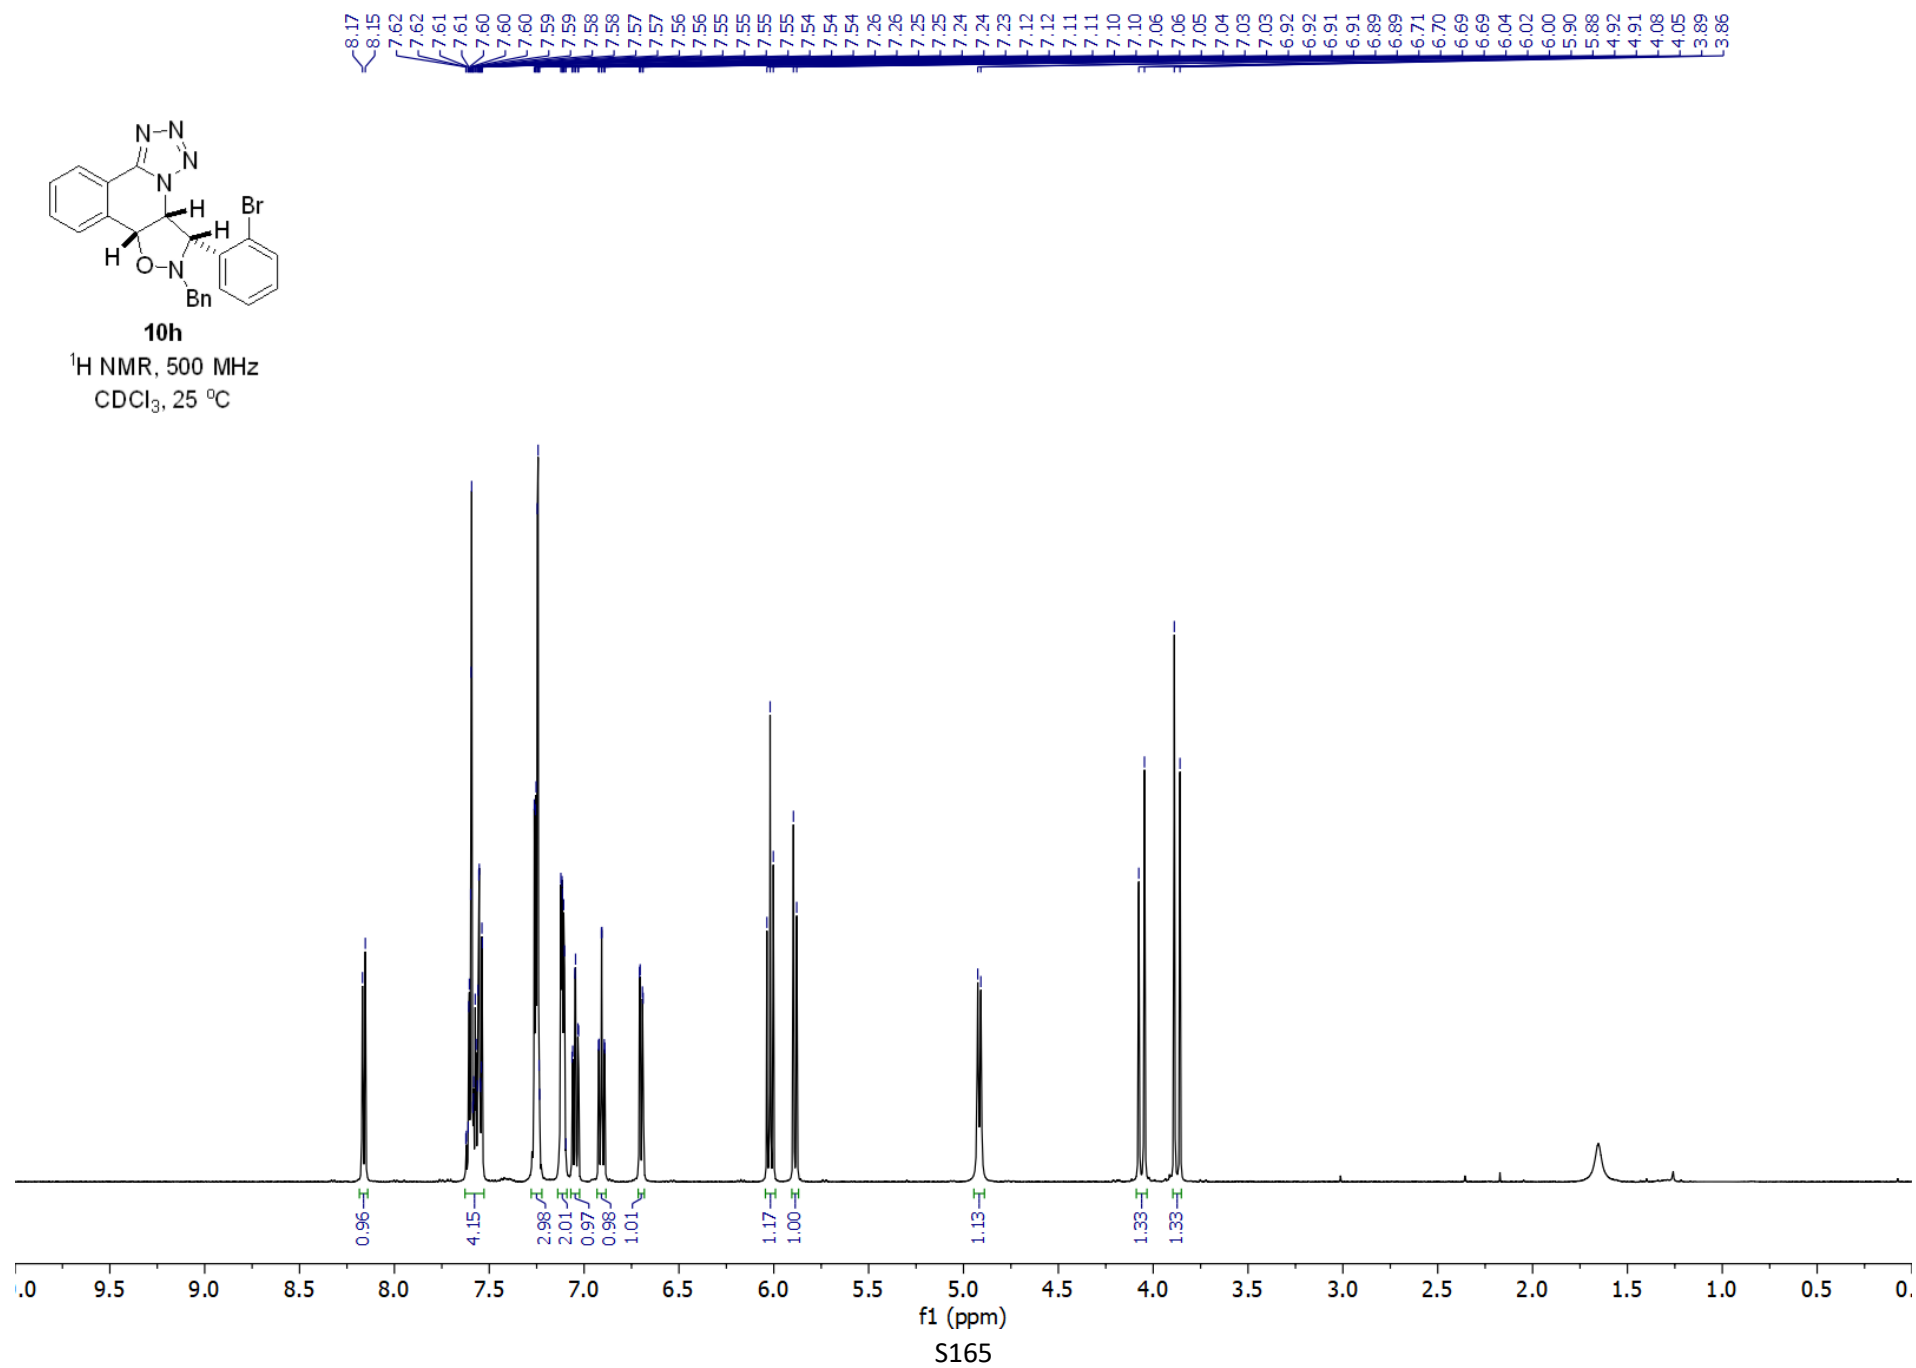

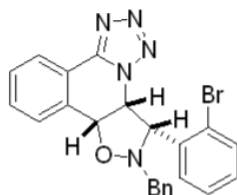

**10h**

$^{13}\text{C}$  NMR, 125 MHz  
 $\text{CDCl}_3$ , 25  $^\circ\text{C}$

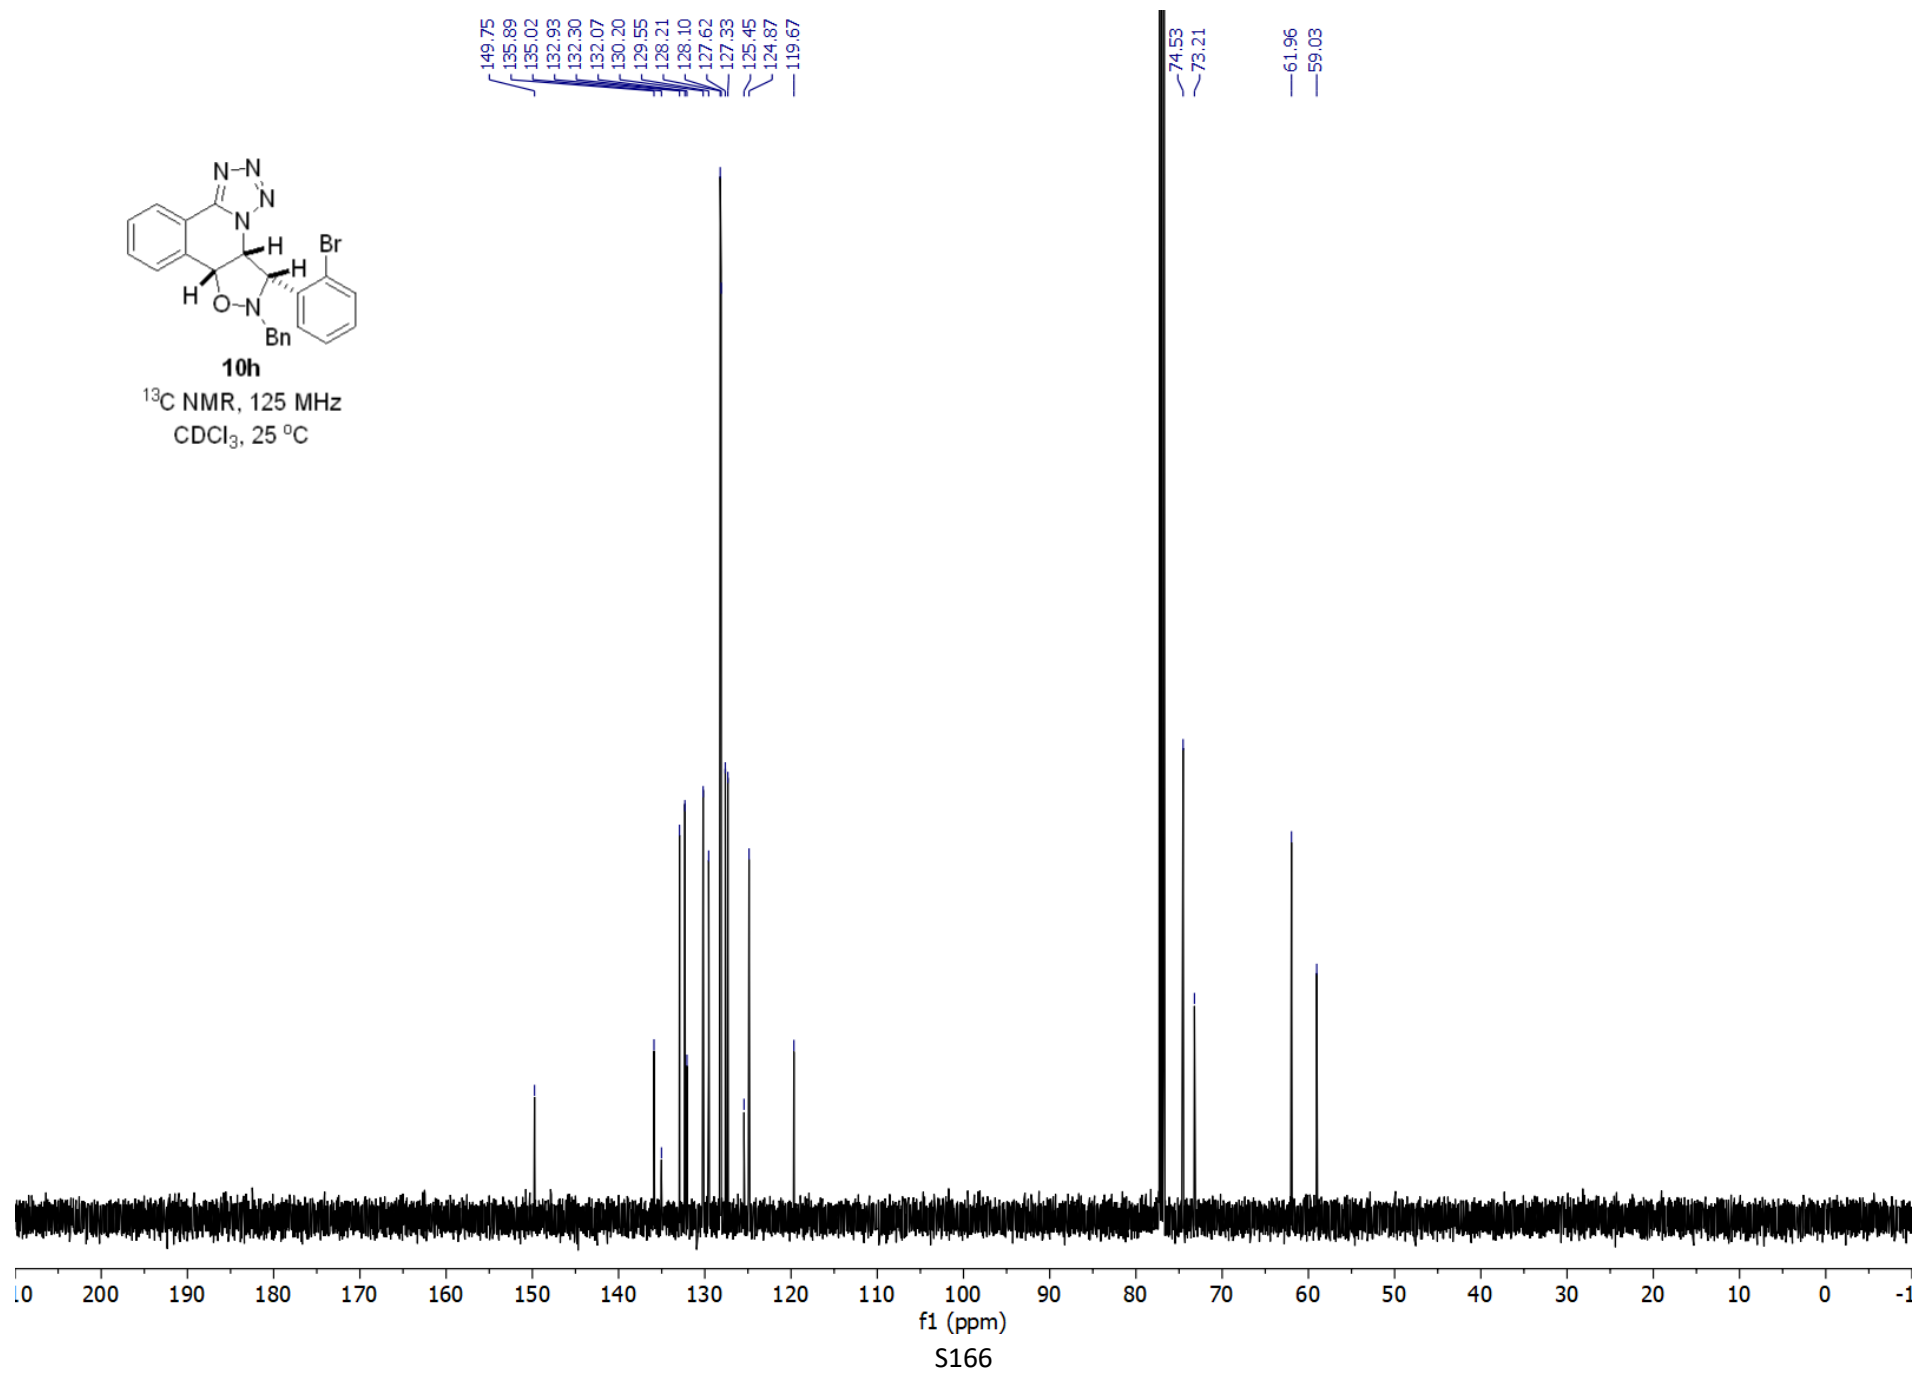

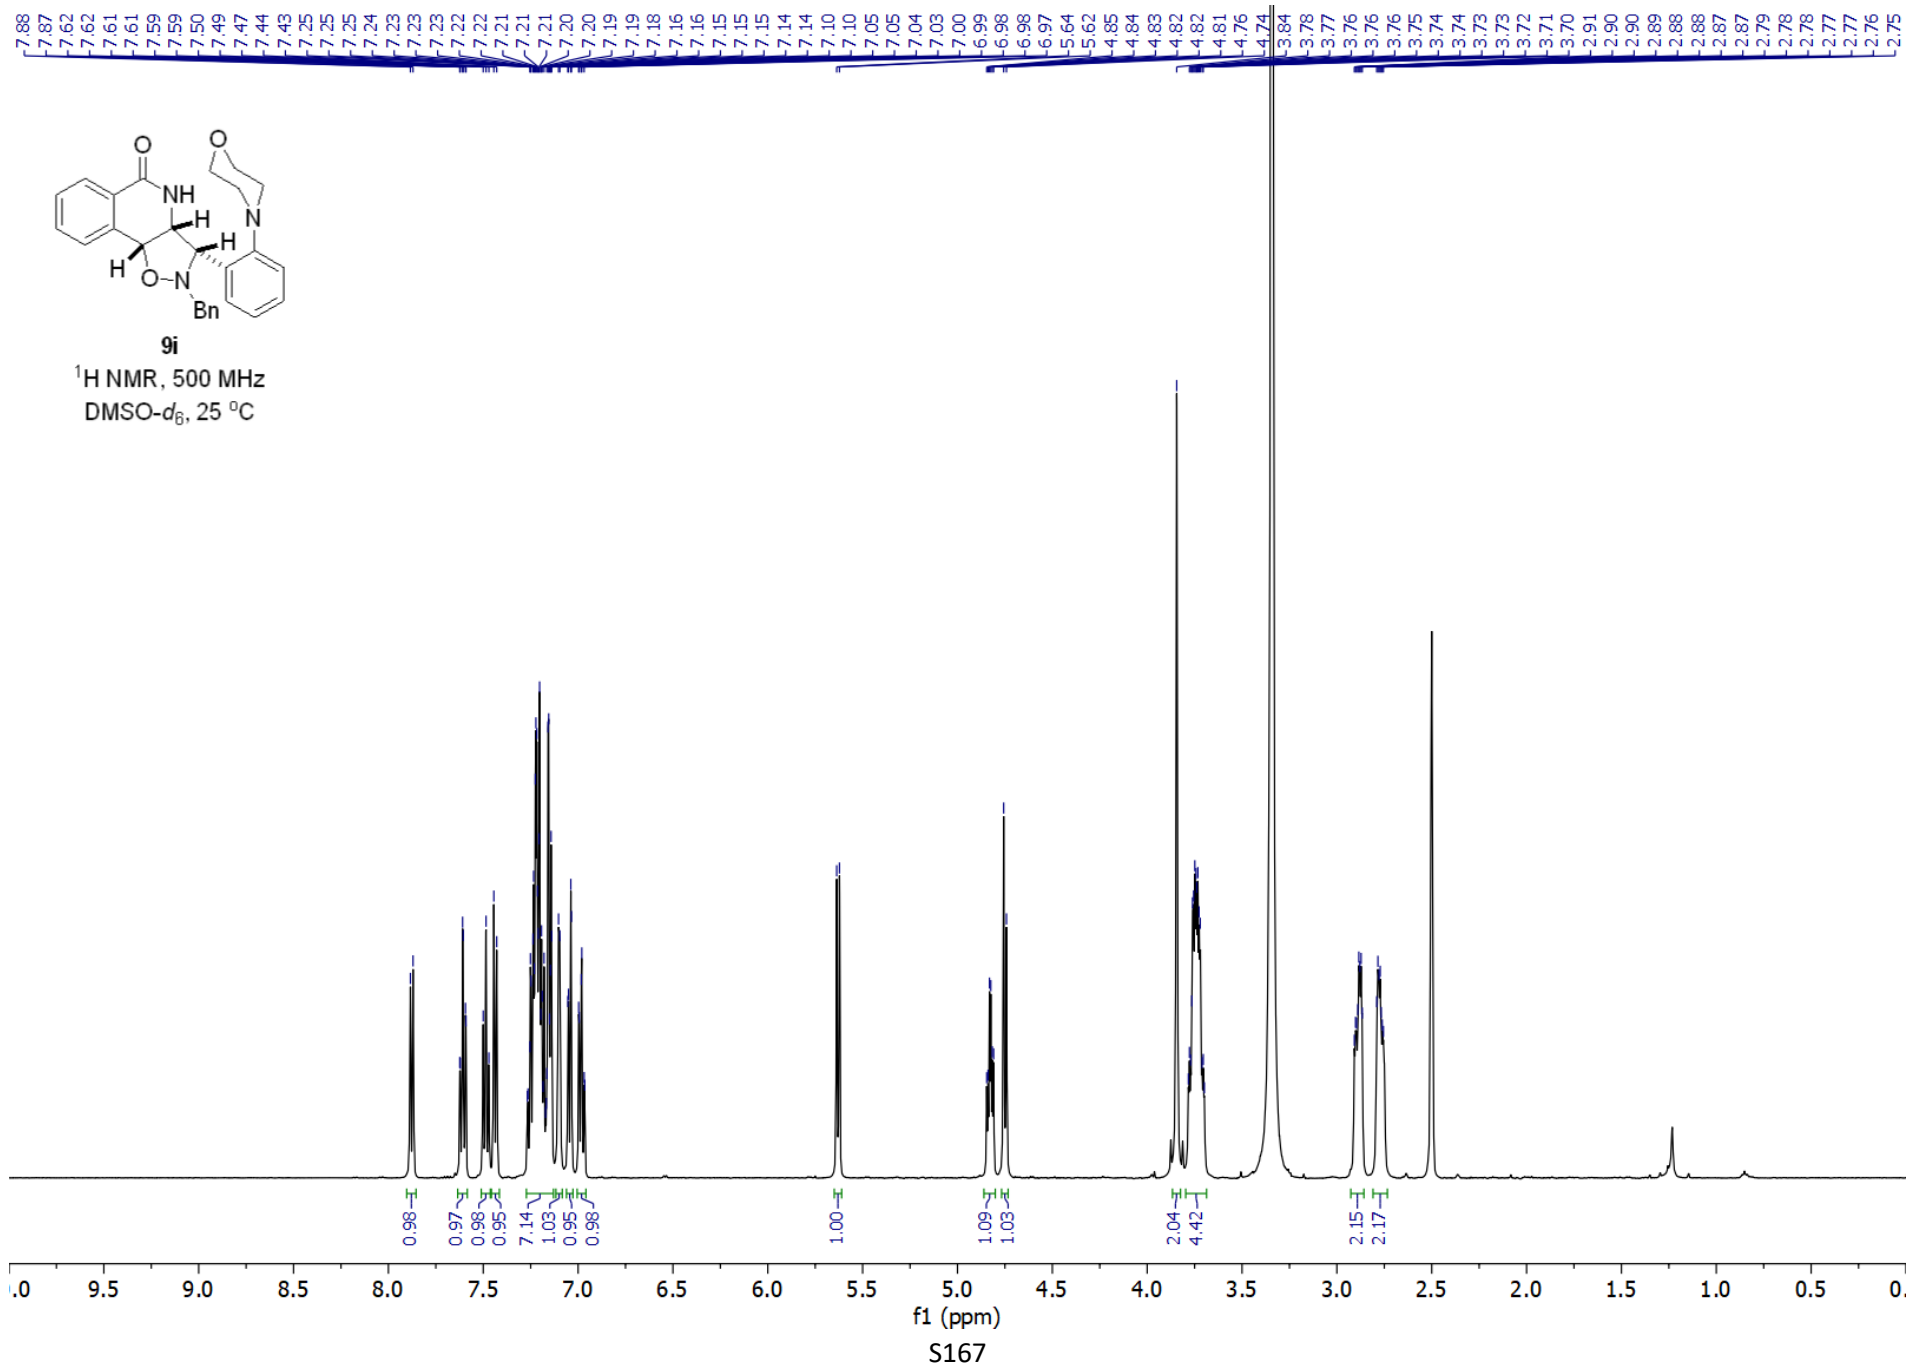

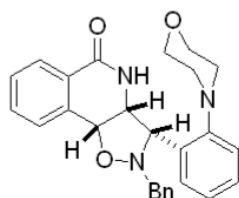

**9i**

$^1\text{H}$  NMR, 500 MHz  
DMSO- $d_6$ , 25  $^\circ\text{C}$

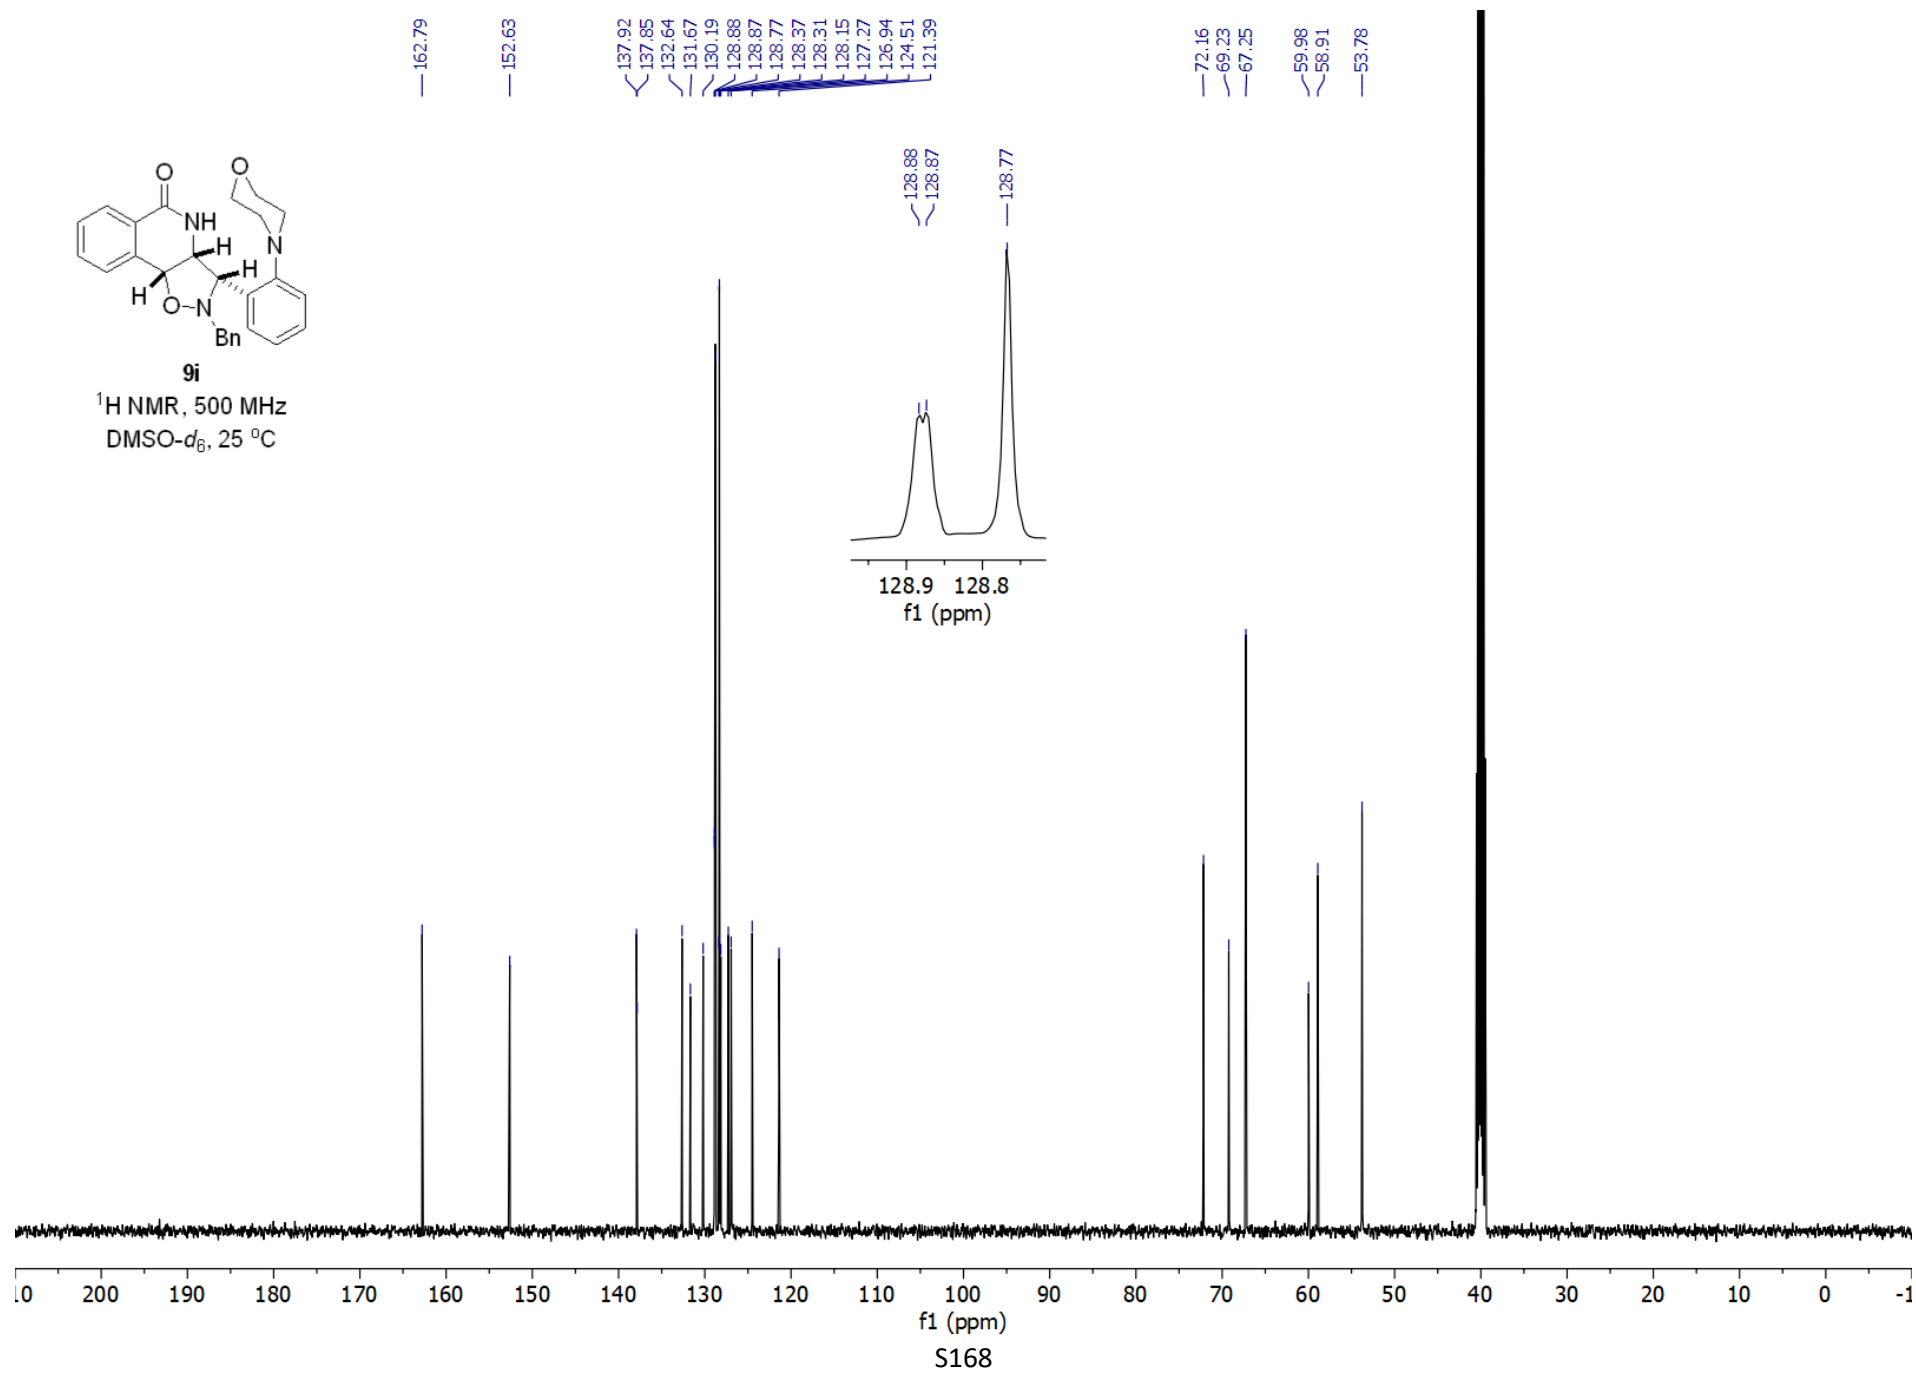

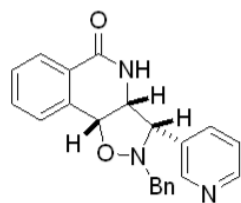

9j

$^1\text{H}$  NMR, 500 MHz  
DMSO- $d_6$ , 25 °C

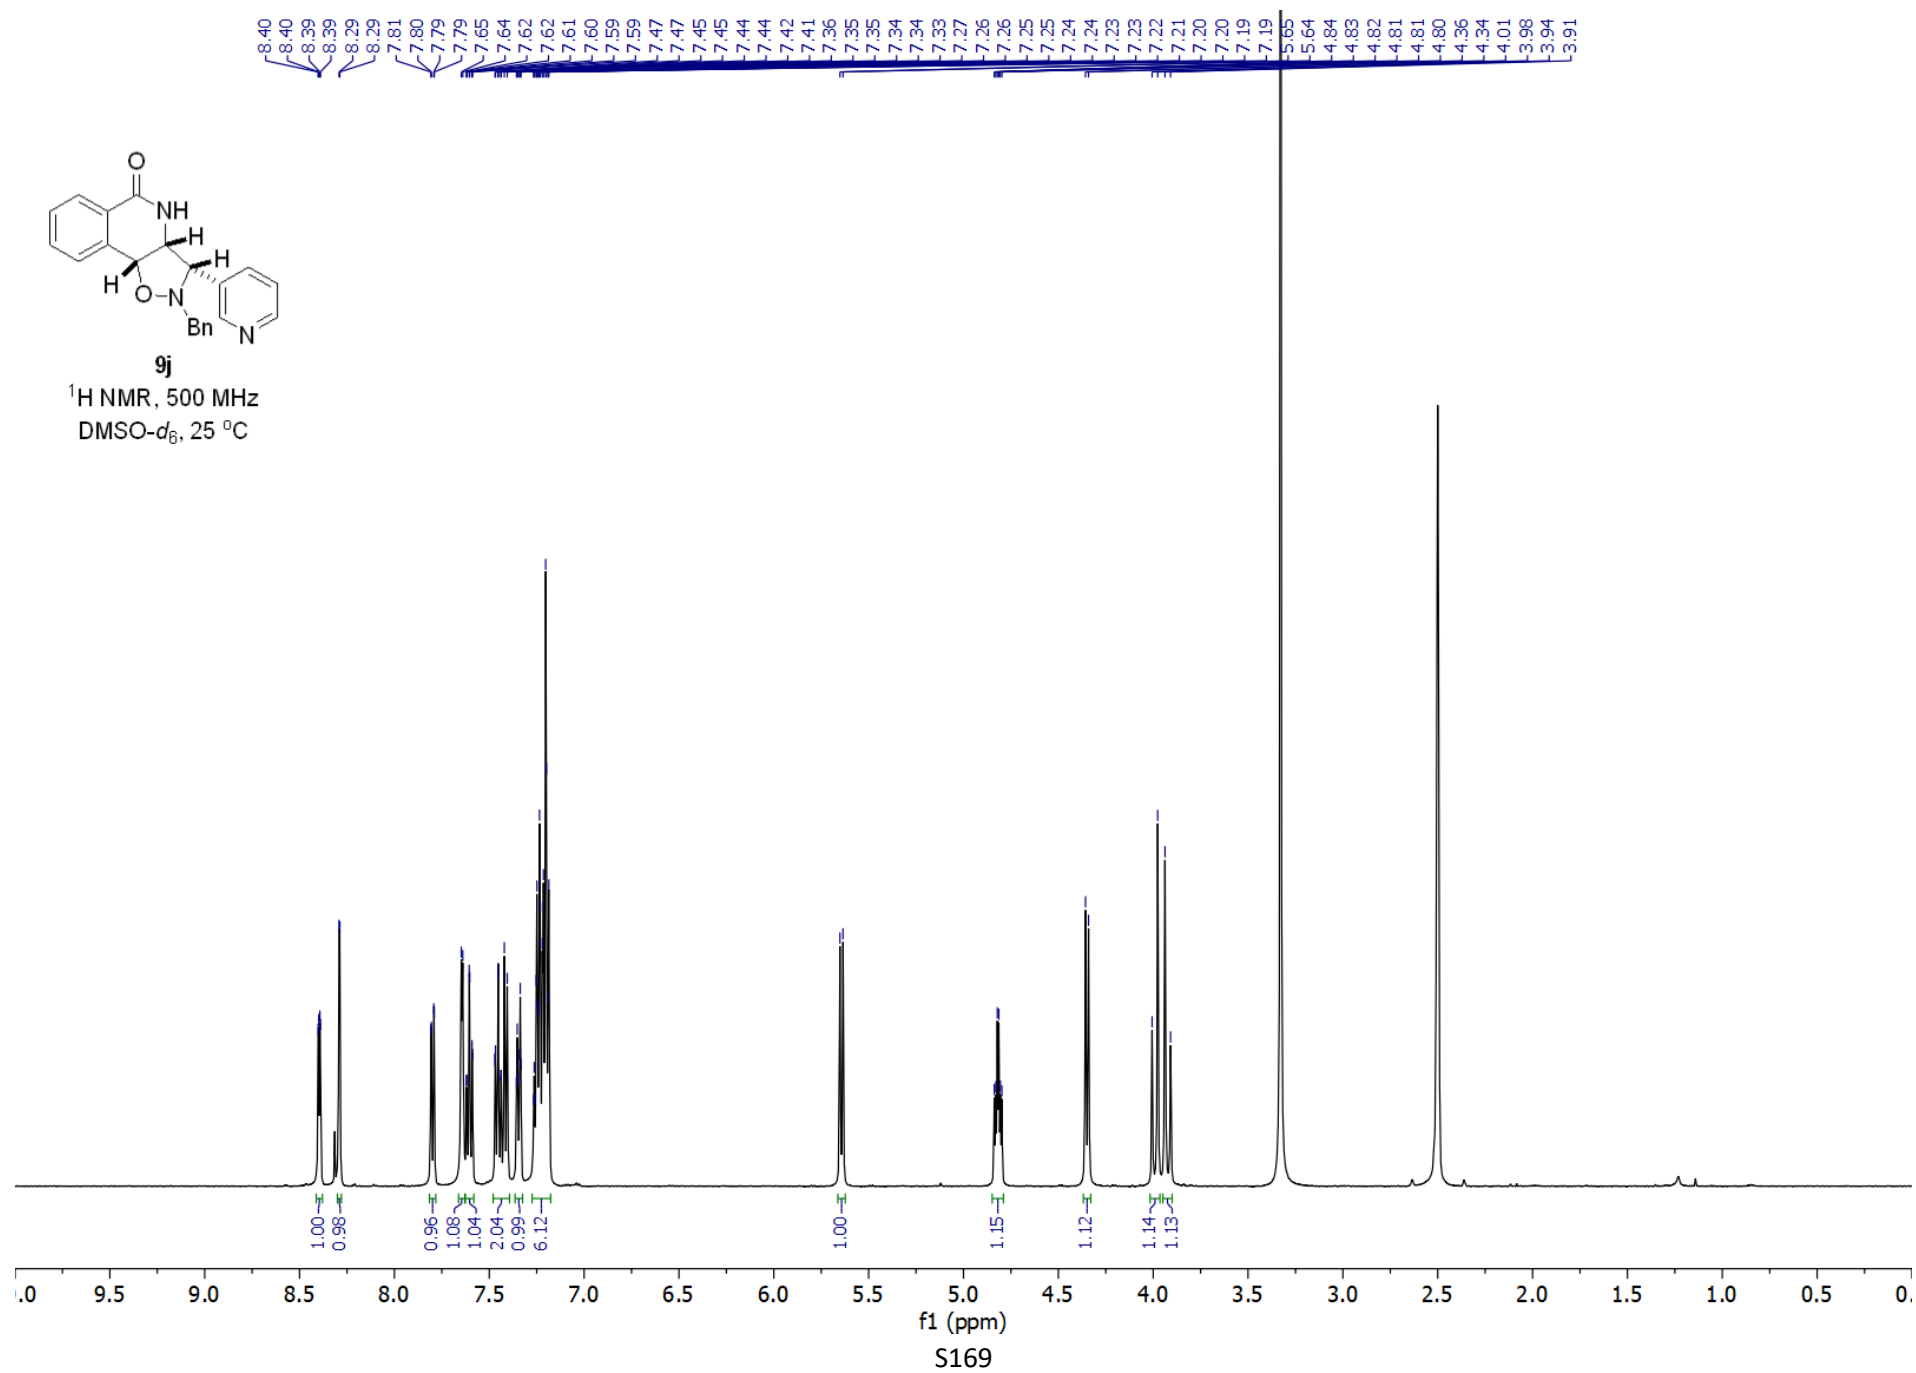

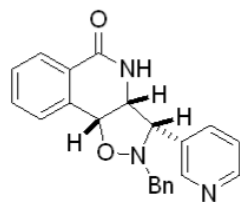

9j

$^{13}\text{C}$  NMR, 125 MHz  
DMSO- $d_6$ , 25 °C

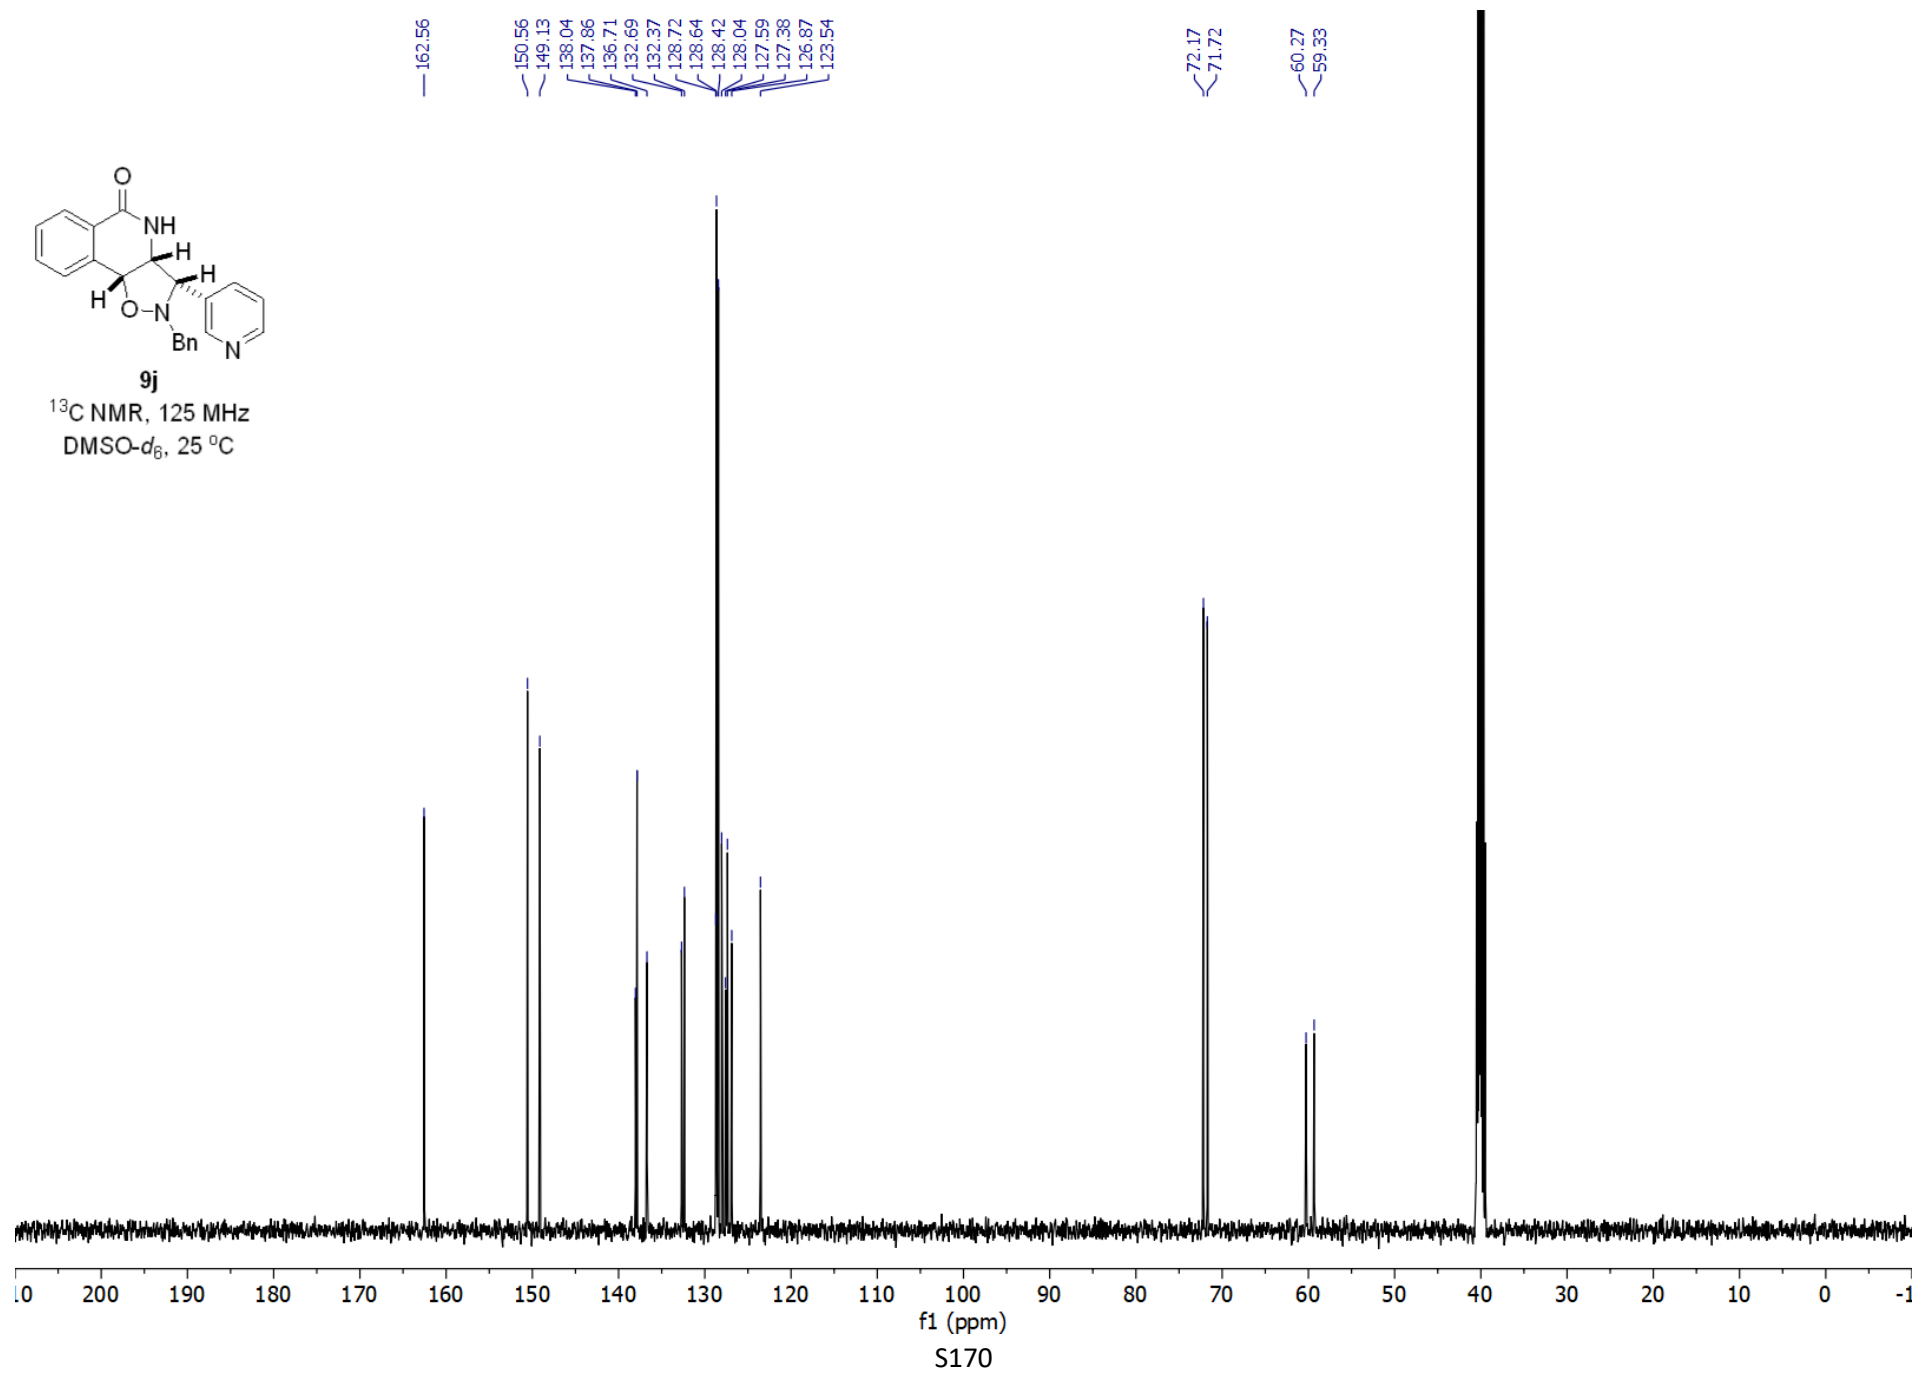

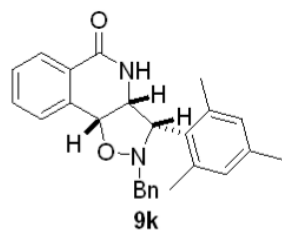

$^1\text{H}$  NMR, 500 MHz  
DMSO- $d_6$ , 60  $^\circ\text{C}$

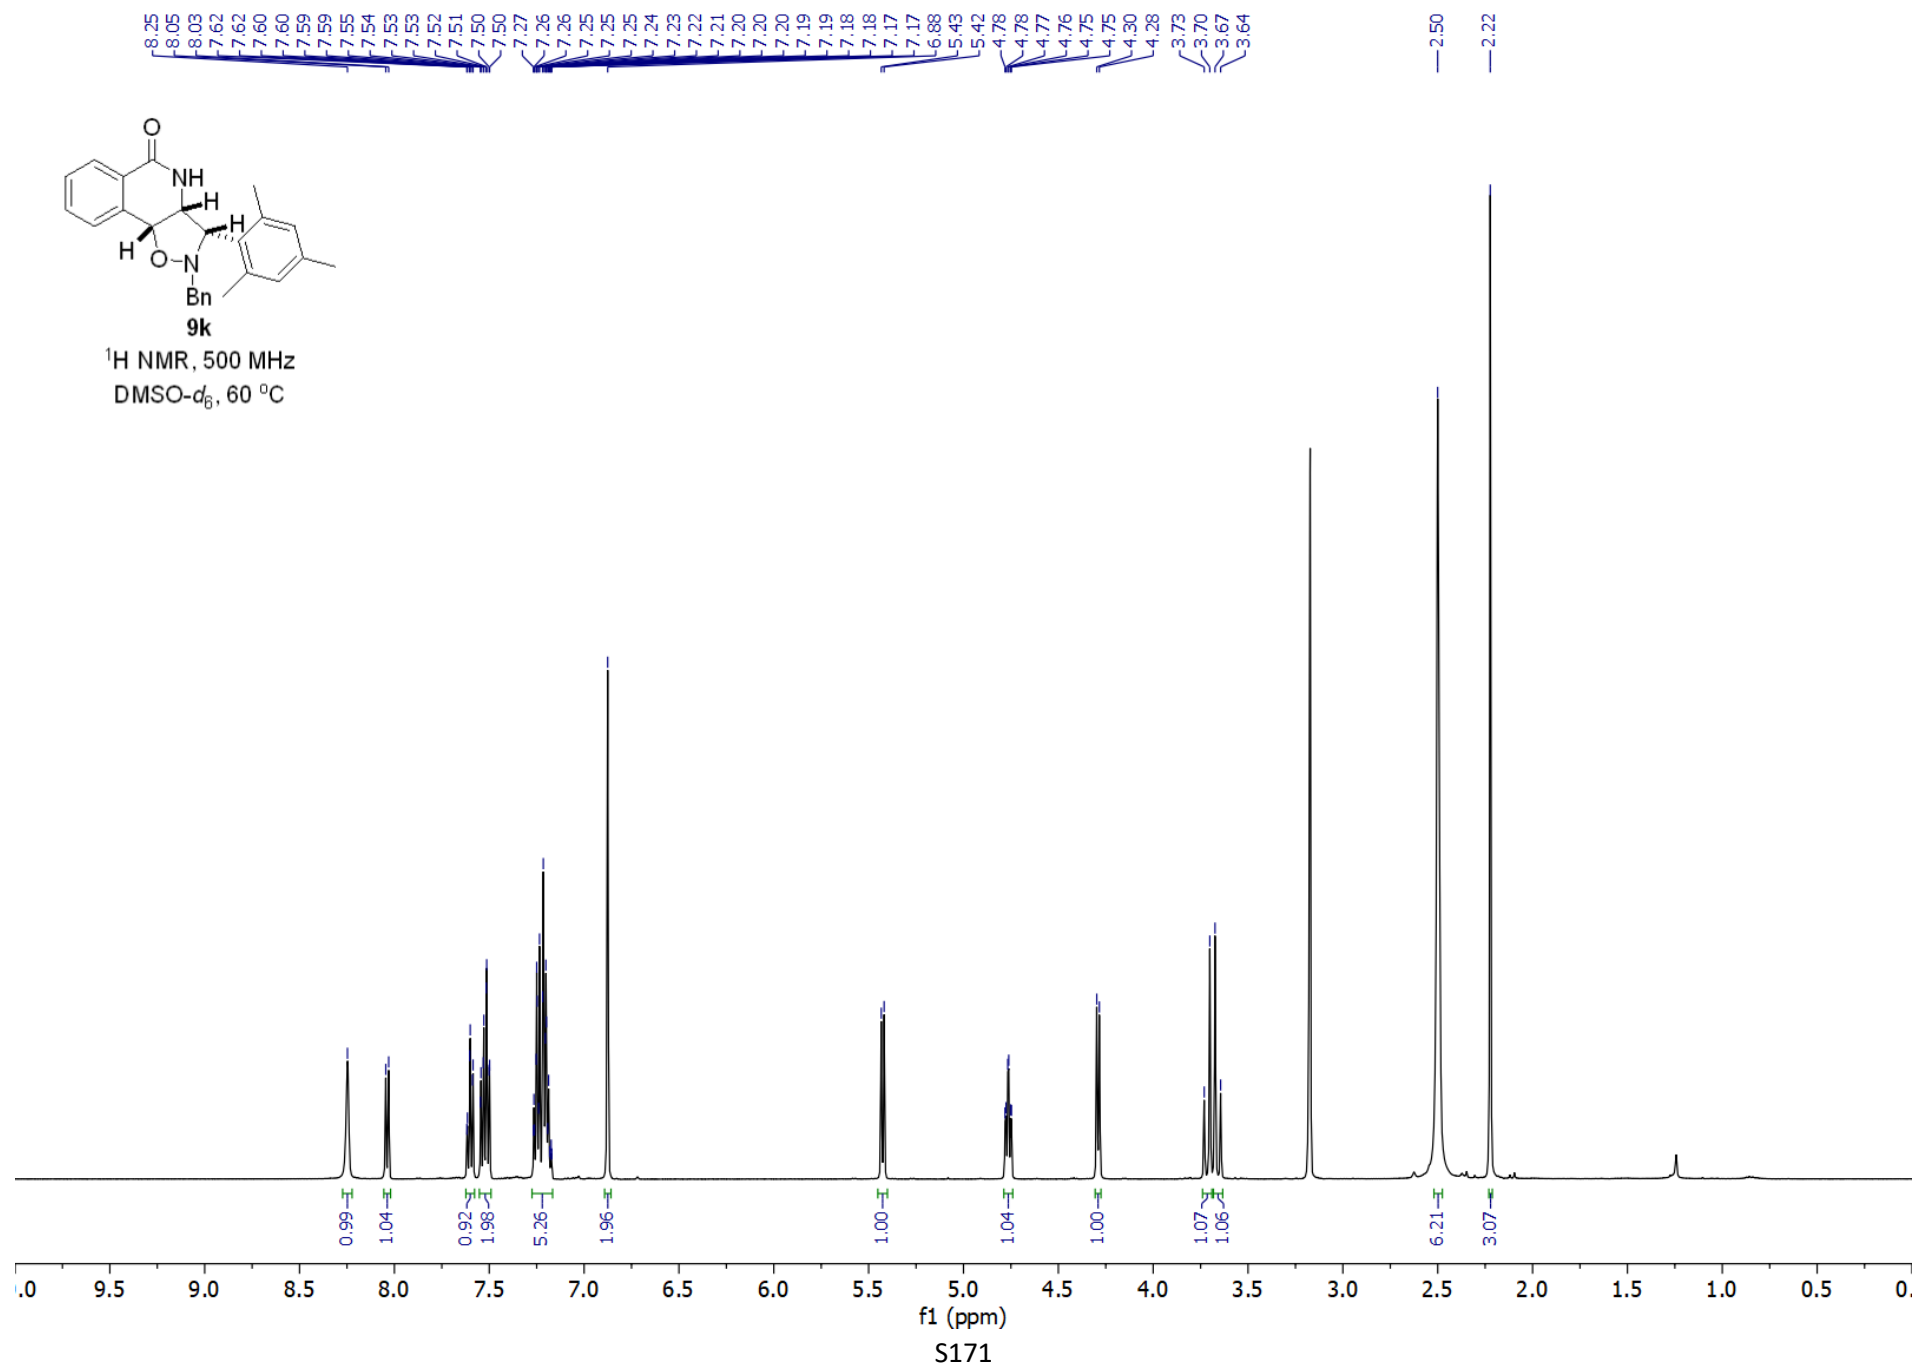

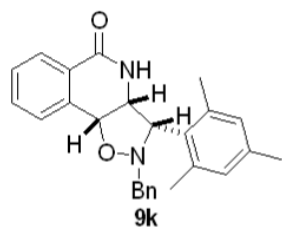

$^{13}\text{C}$  NMR, 125 MHz  
DMSO- $d_6$ , 60  $^{\circ}\text{C}$

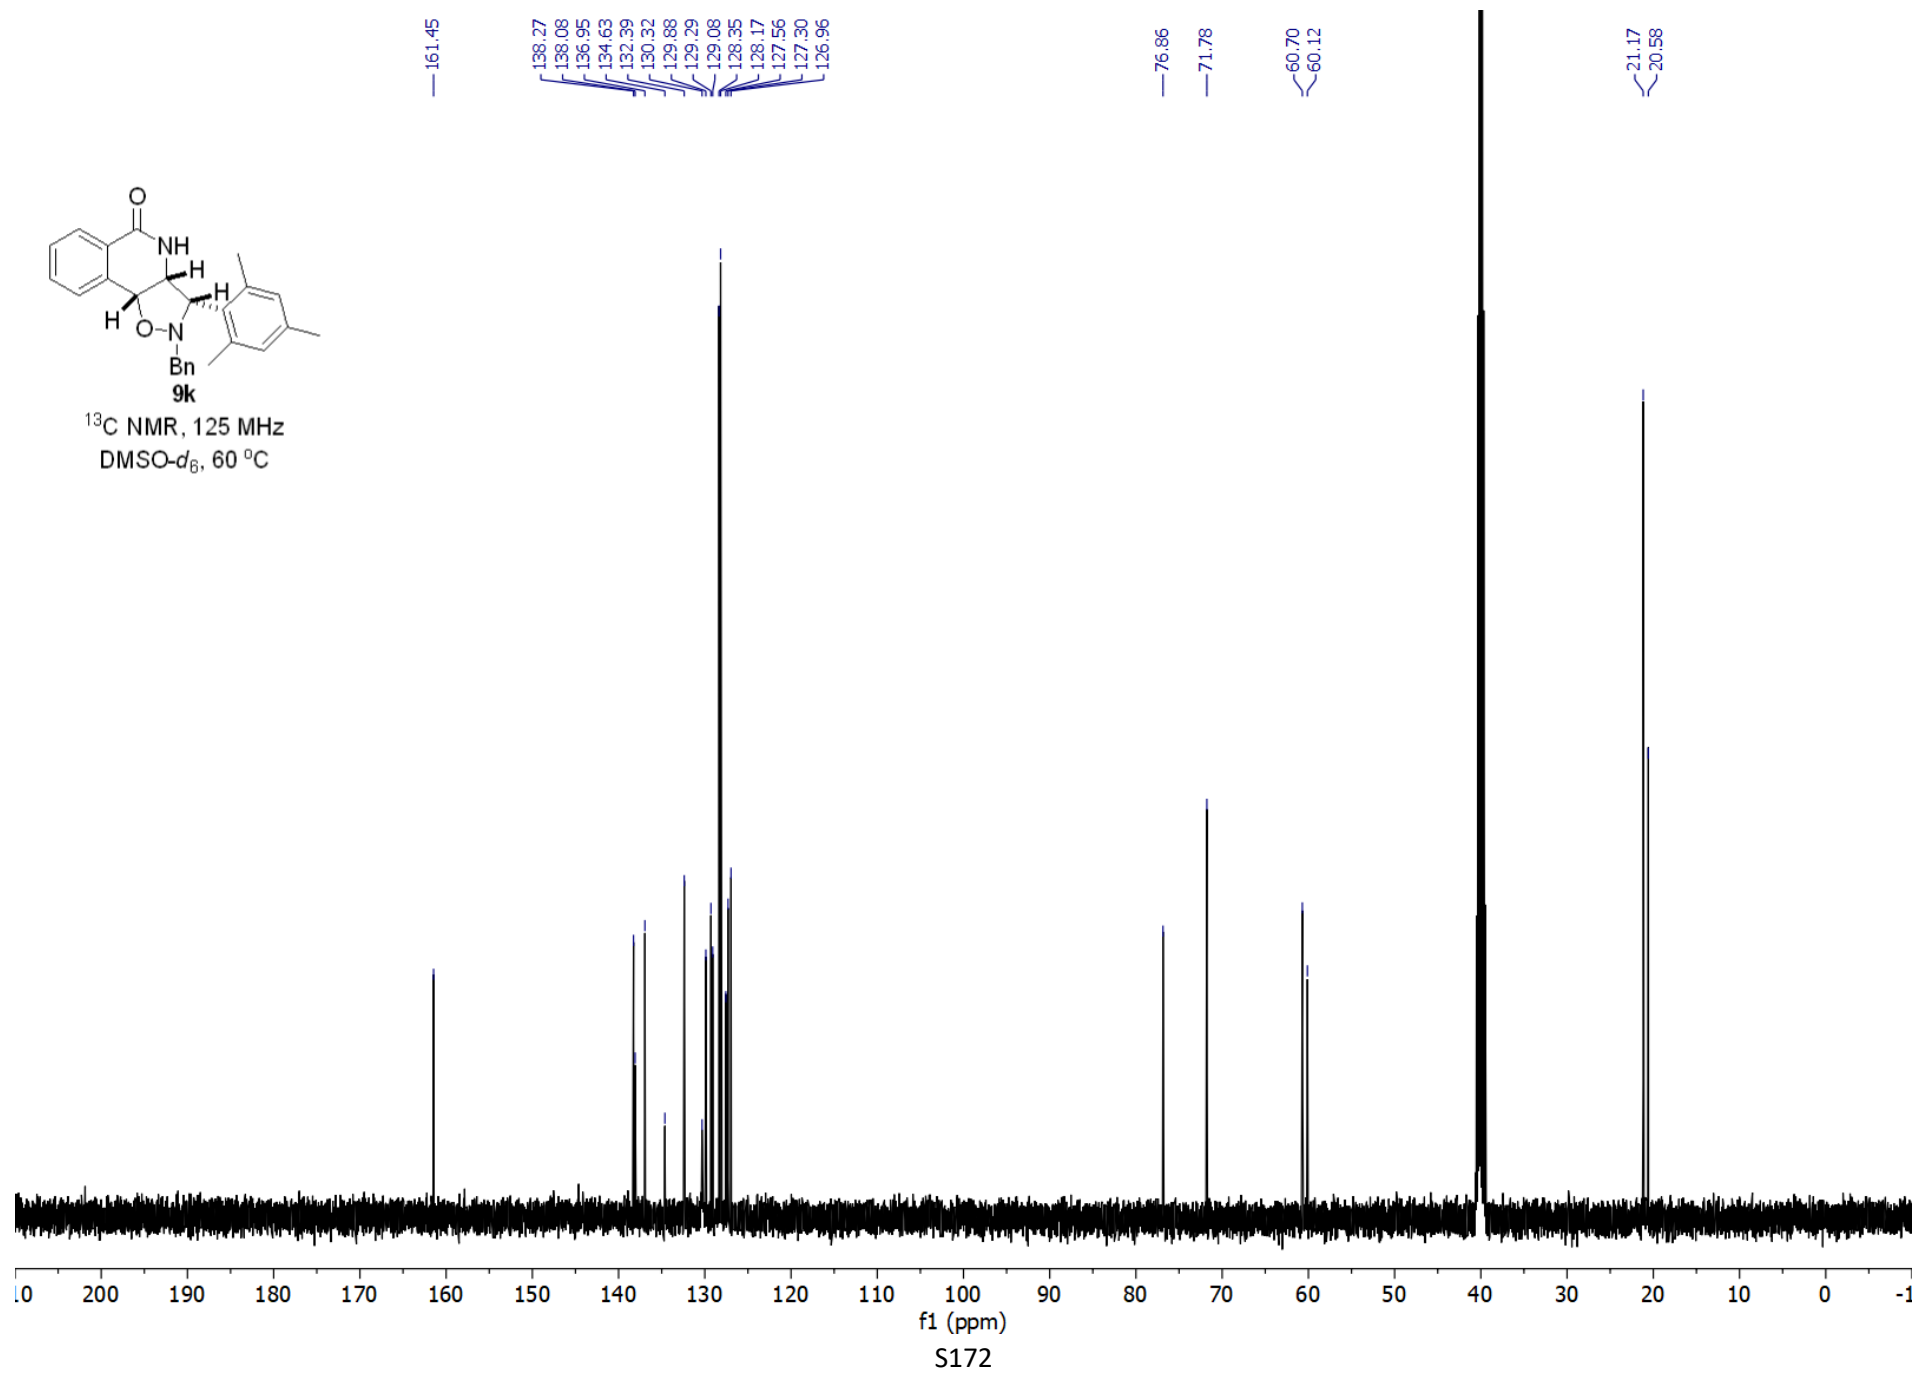

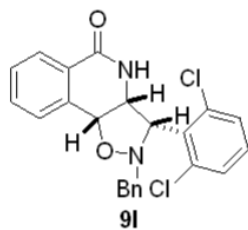

$^1\text{H}$  NMR, 500 MHz  
DMSO- $d_6$ , 60  $^\circ\text{C}$

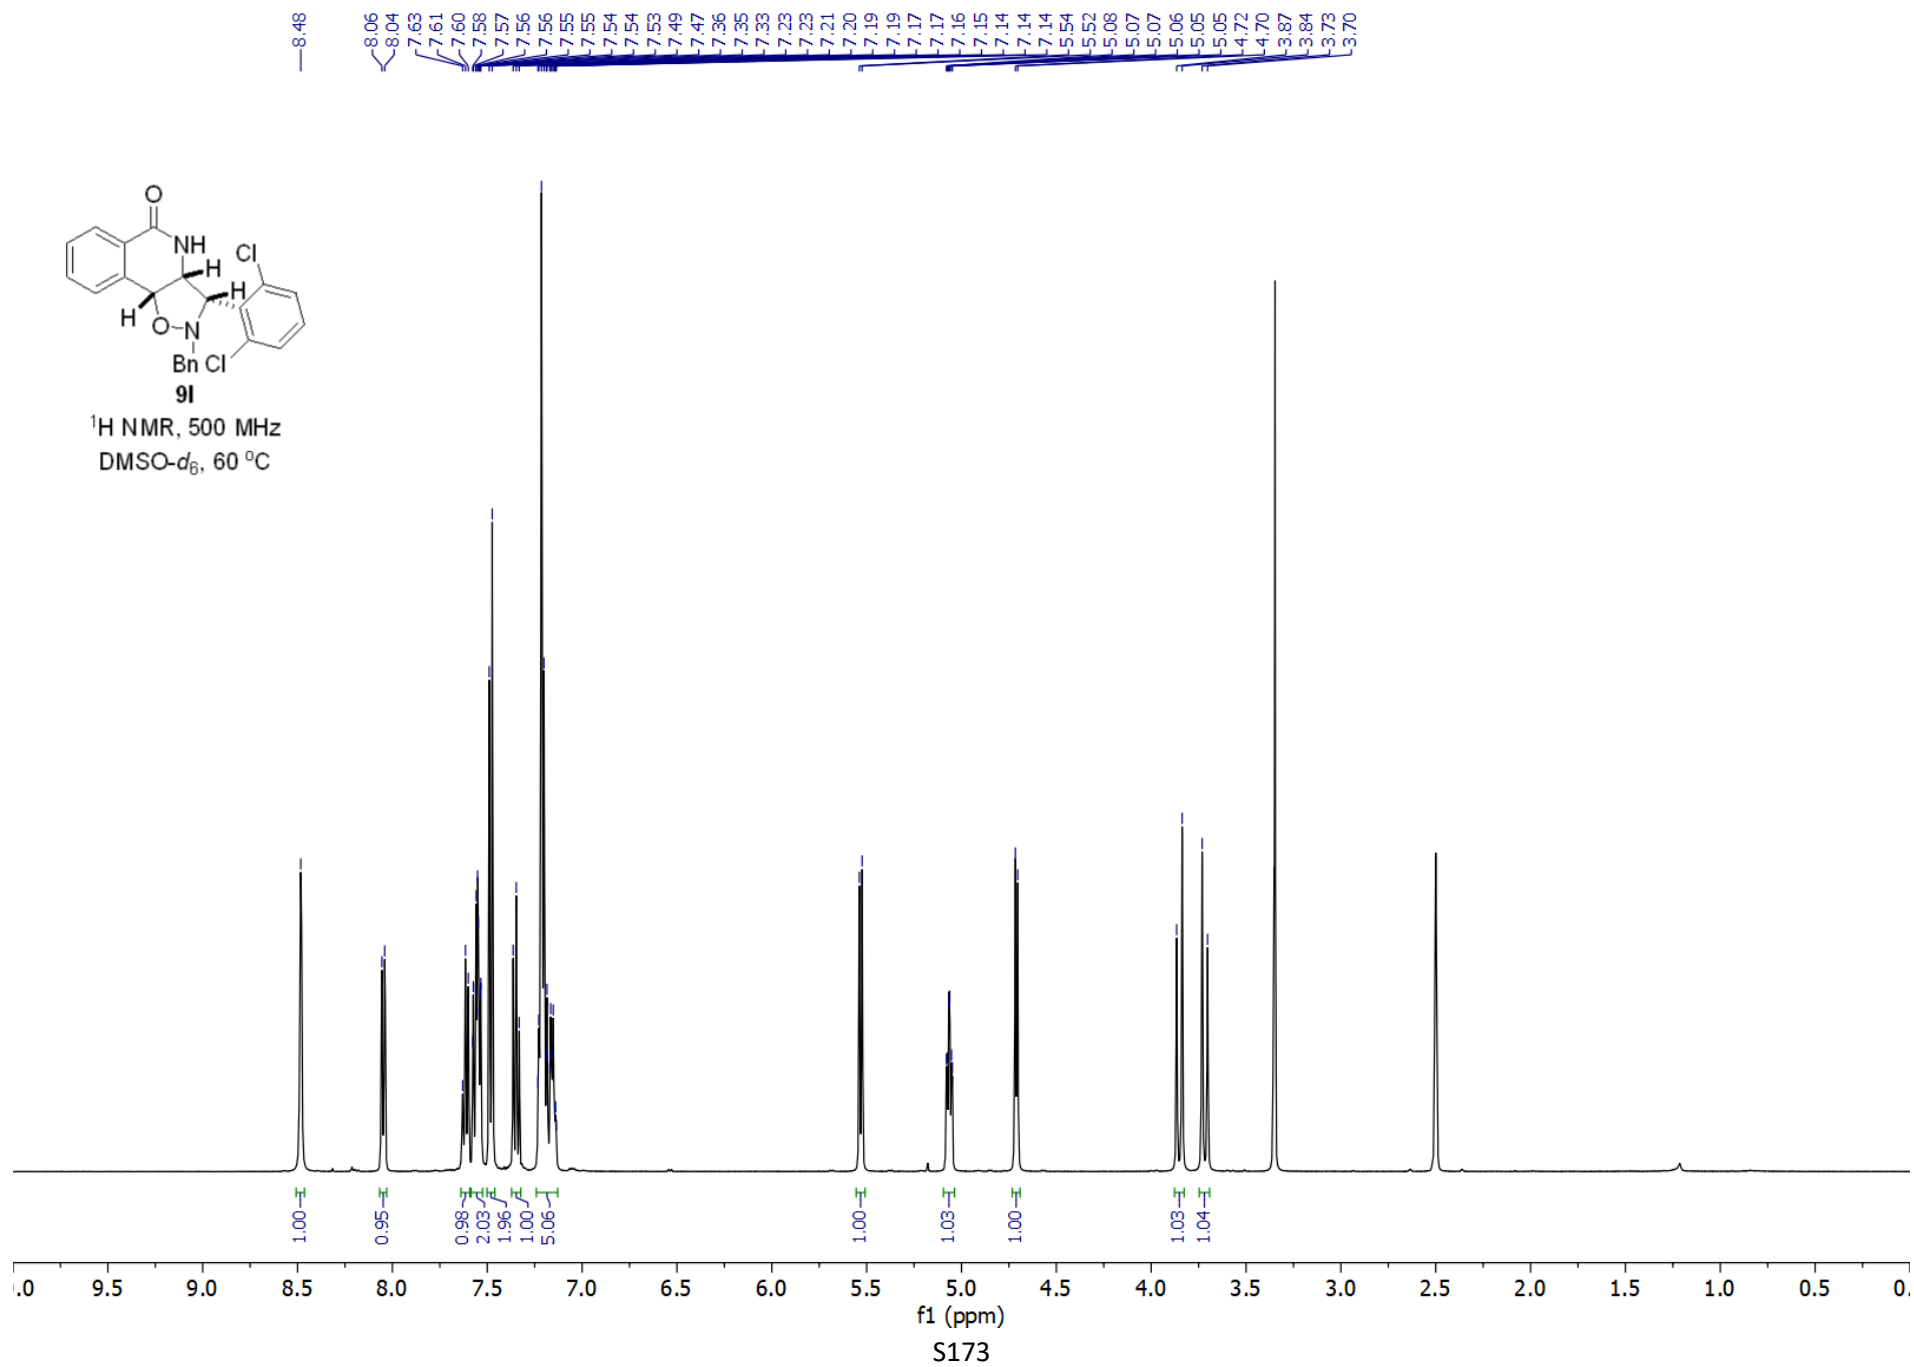

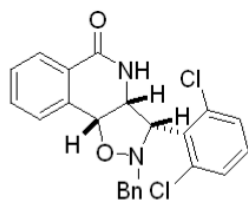

**9I**  
 $^{13}\text{C}$  NMR, 125 MHz  
 DMSO- $d_6$ , 60 °C

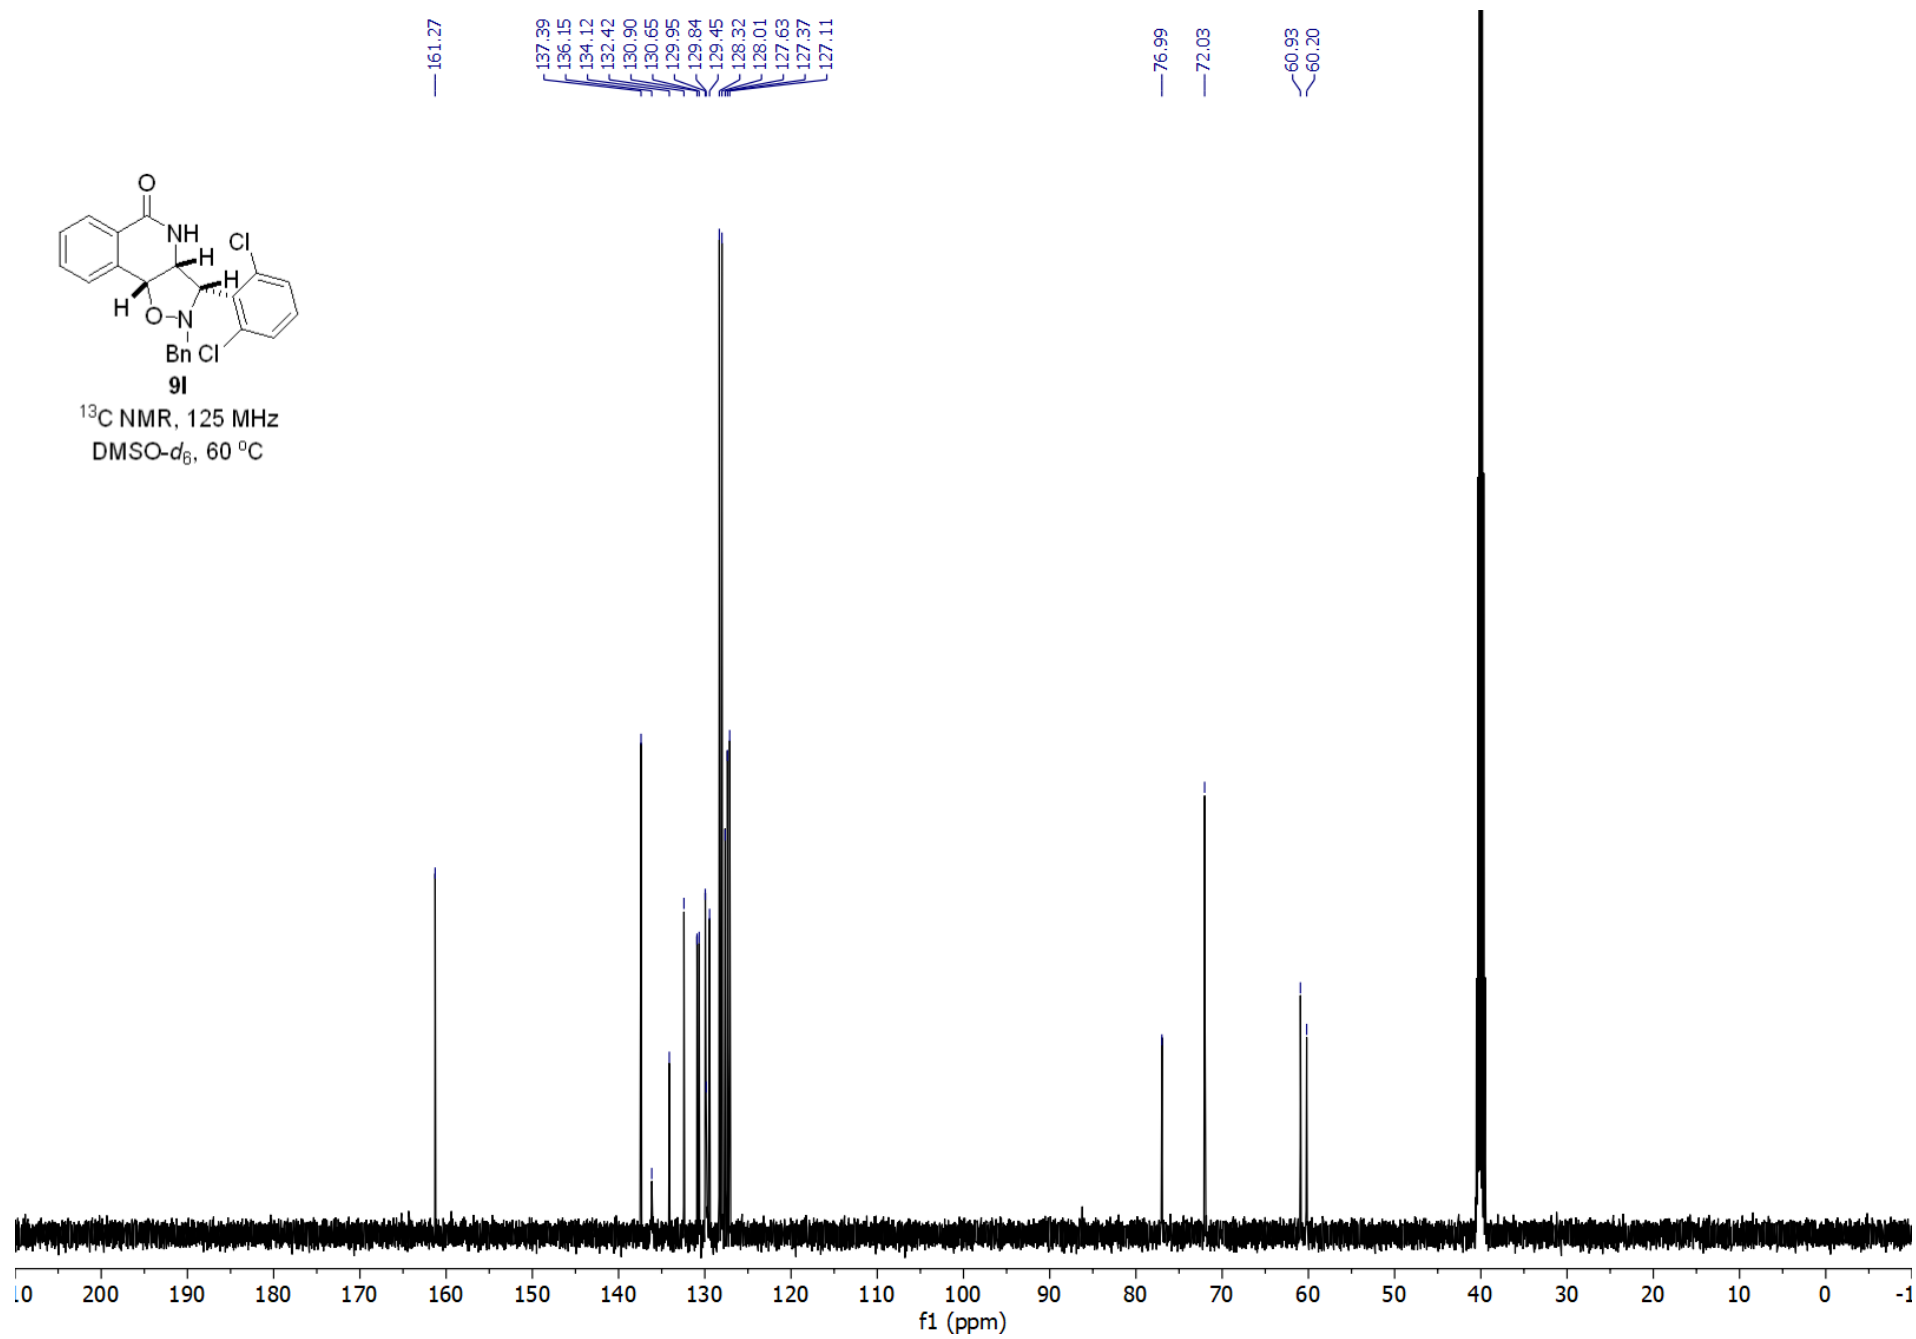

S174

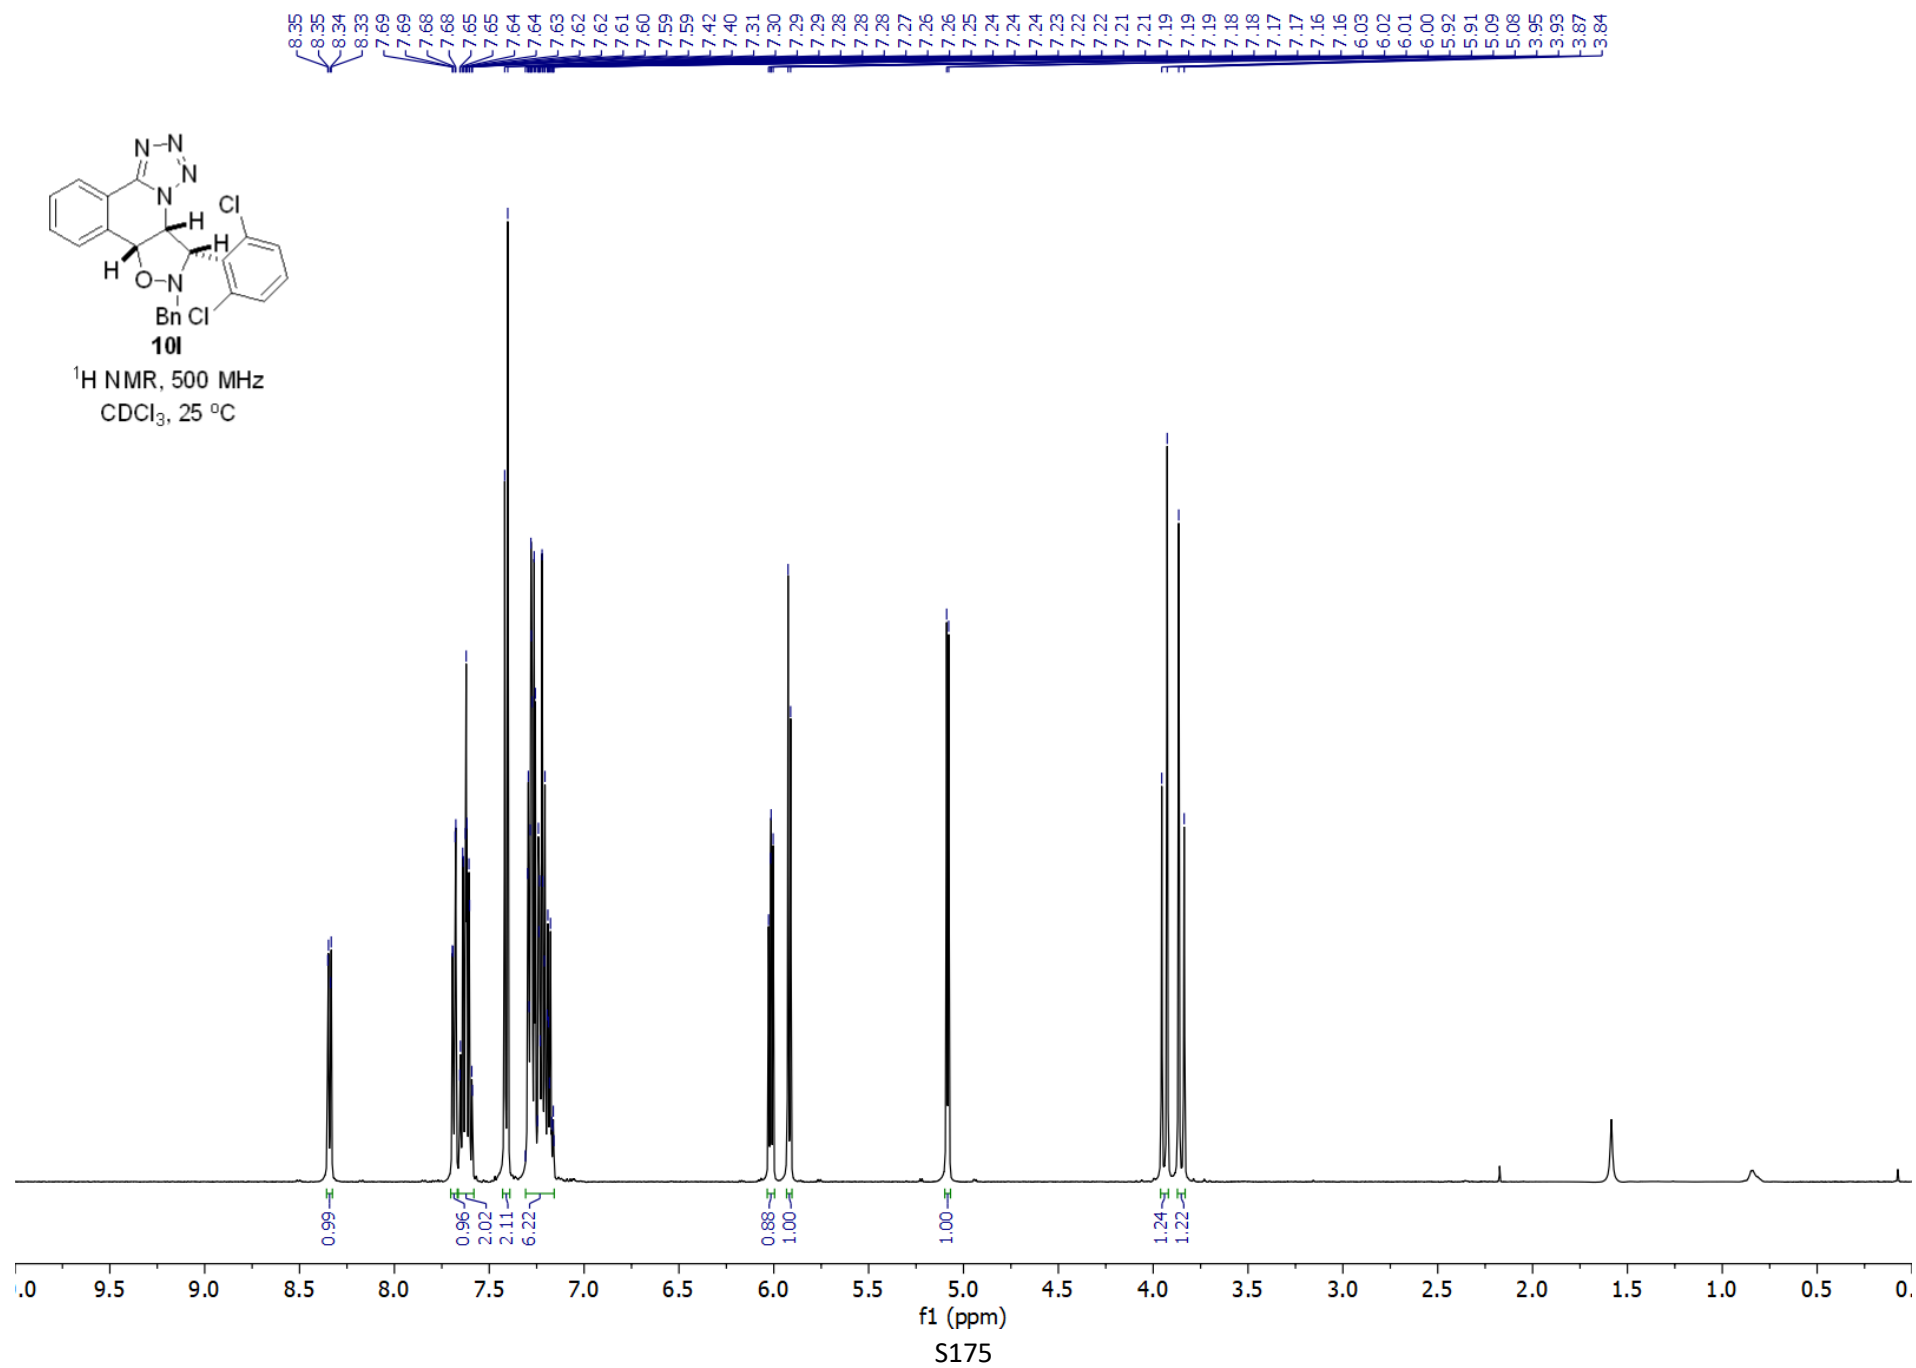

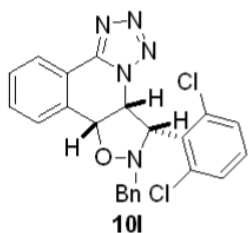

$^{13}\text{C}$  NMR, 125 MHz  
 $\text{CDCl}_3$ , 25  $^\circ\text{C}$

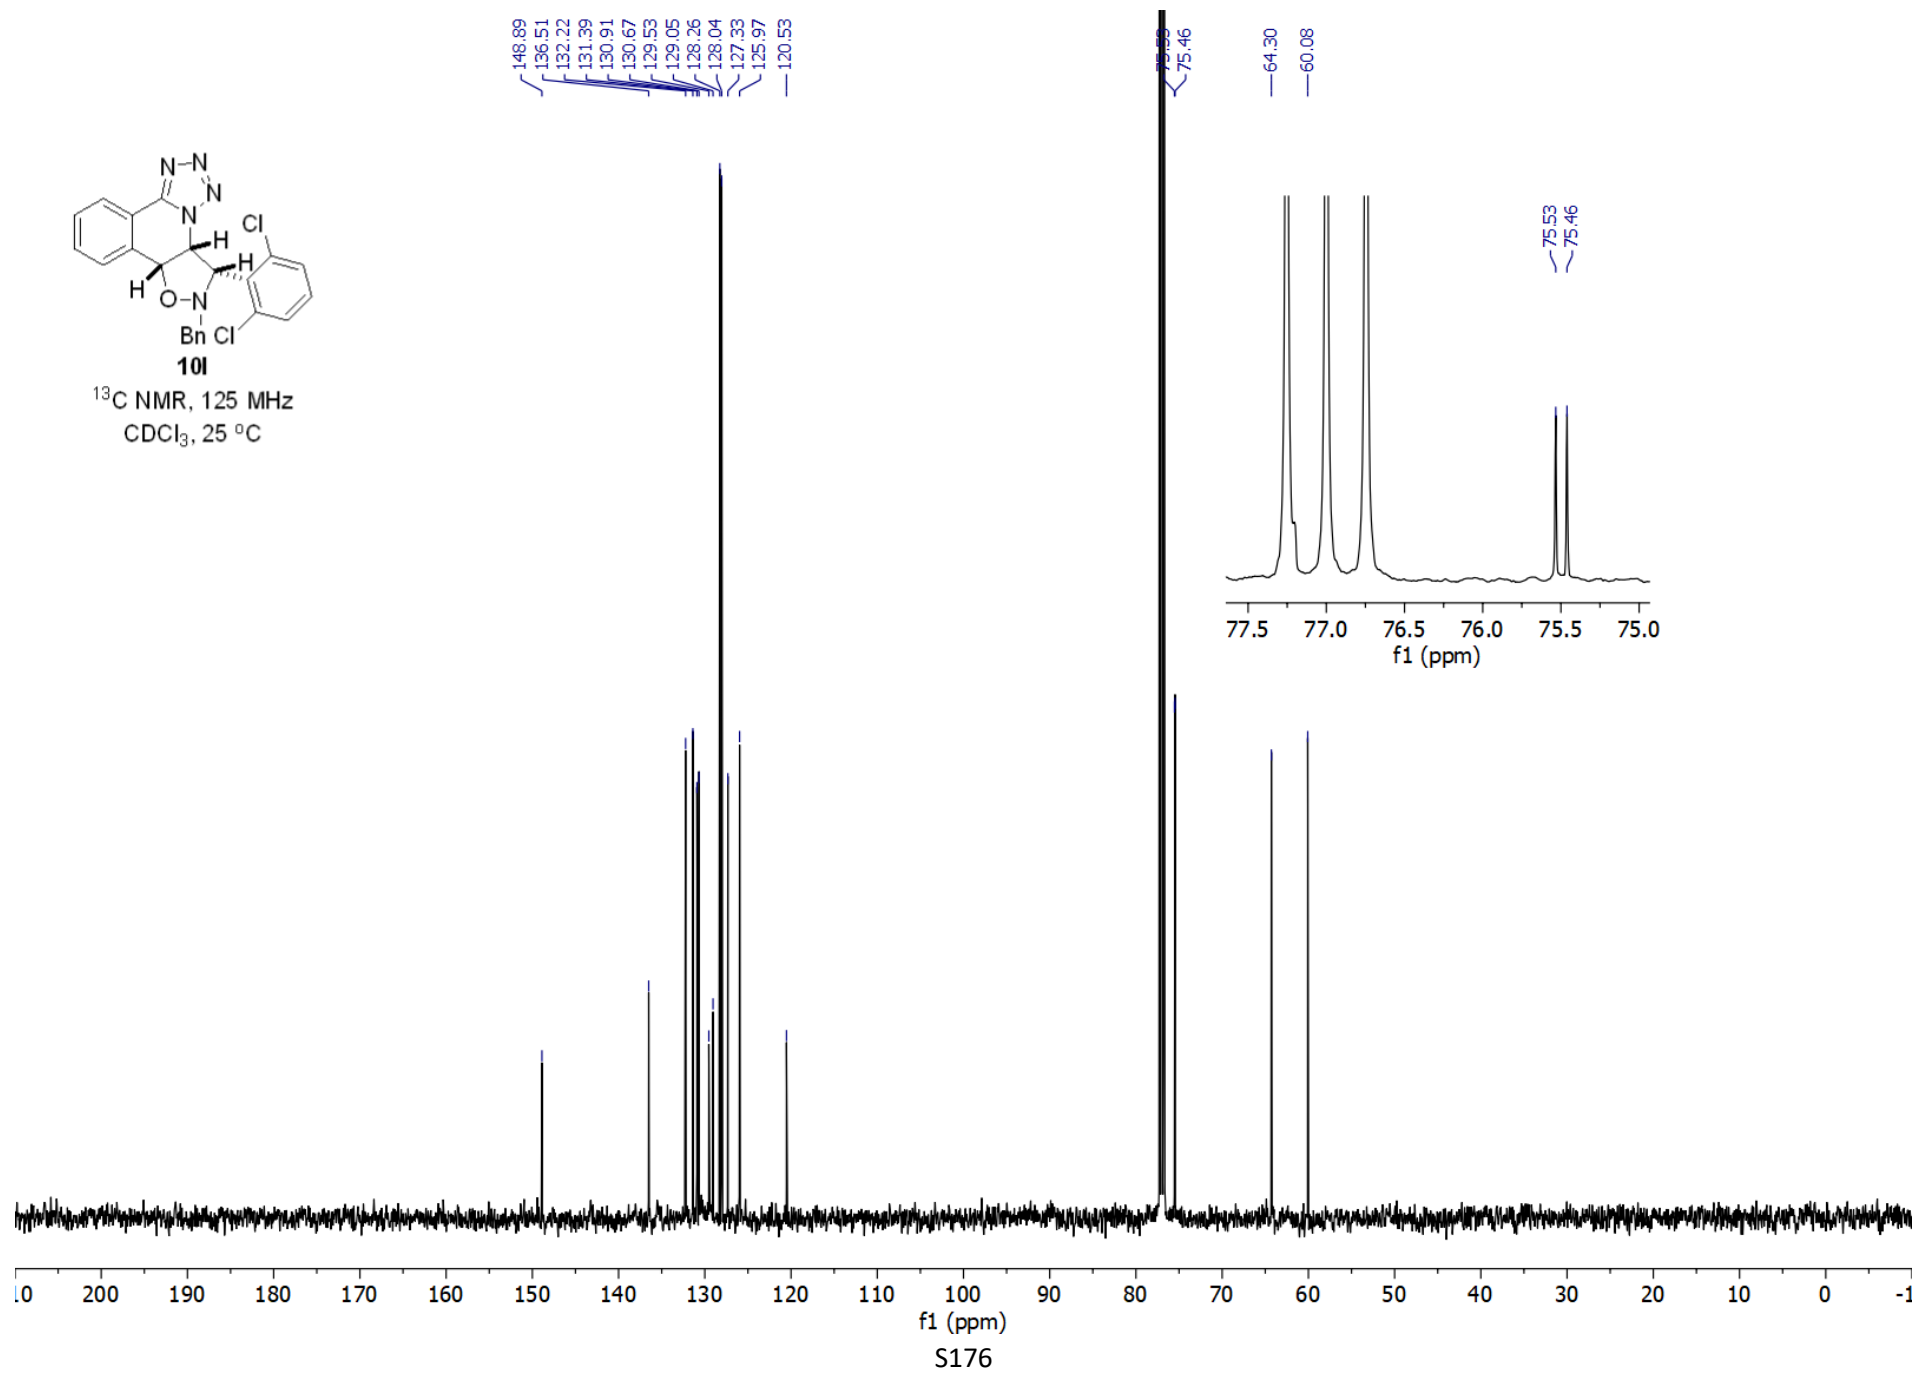

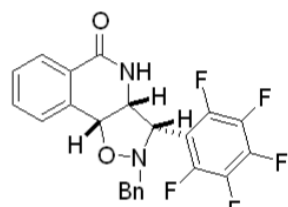

**9m**

$^1\text{H}$  NMR, 500 MHz  
DMSO- $d_6$ , 25  $^\circ\text{C}$

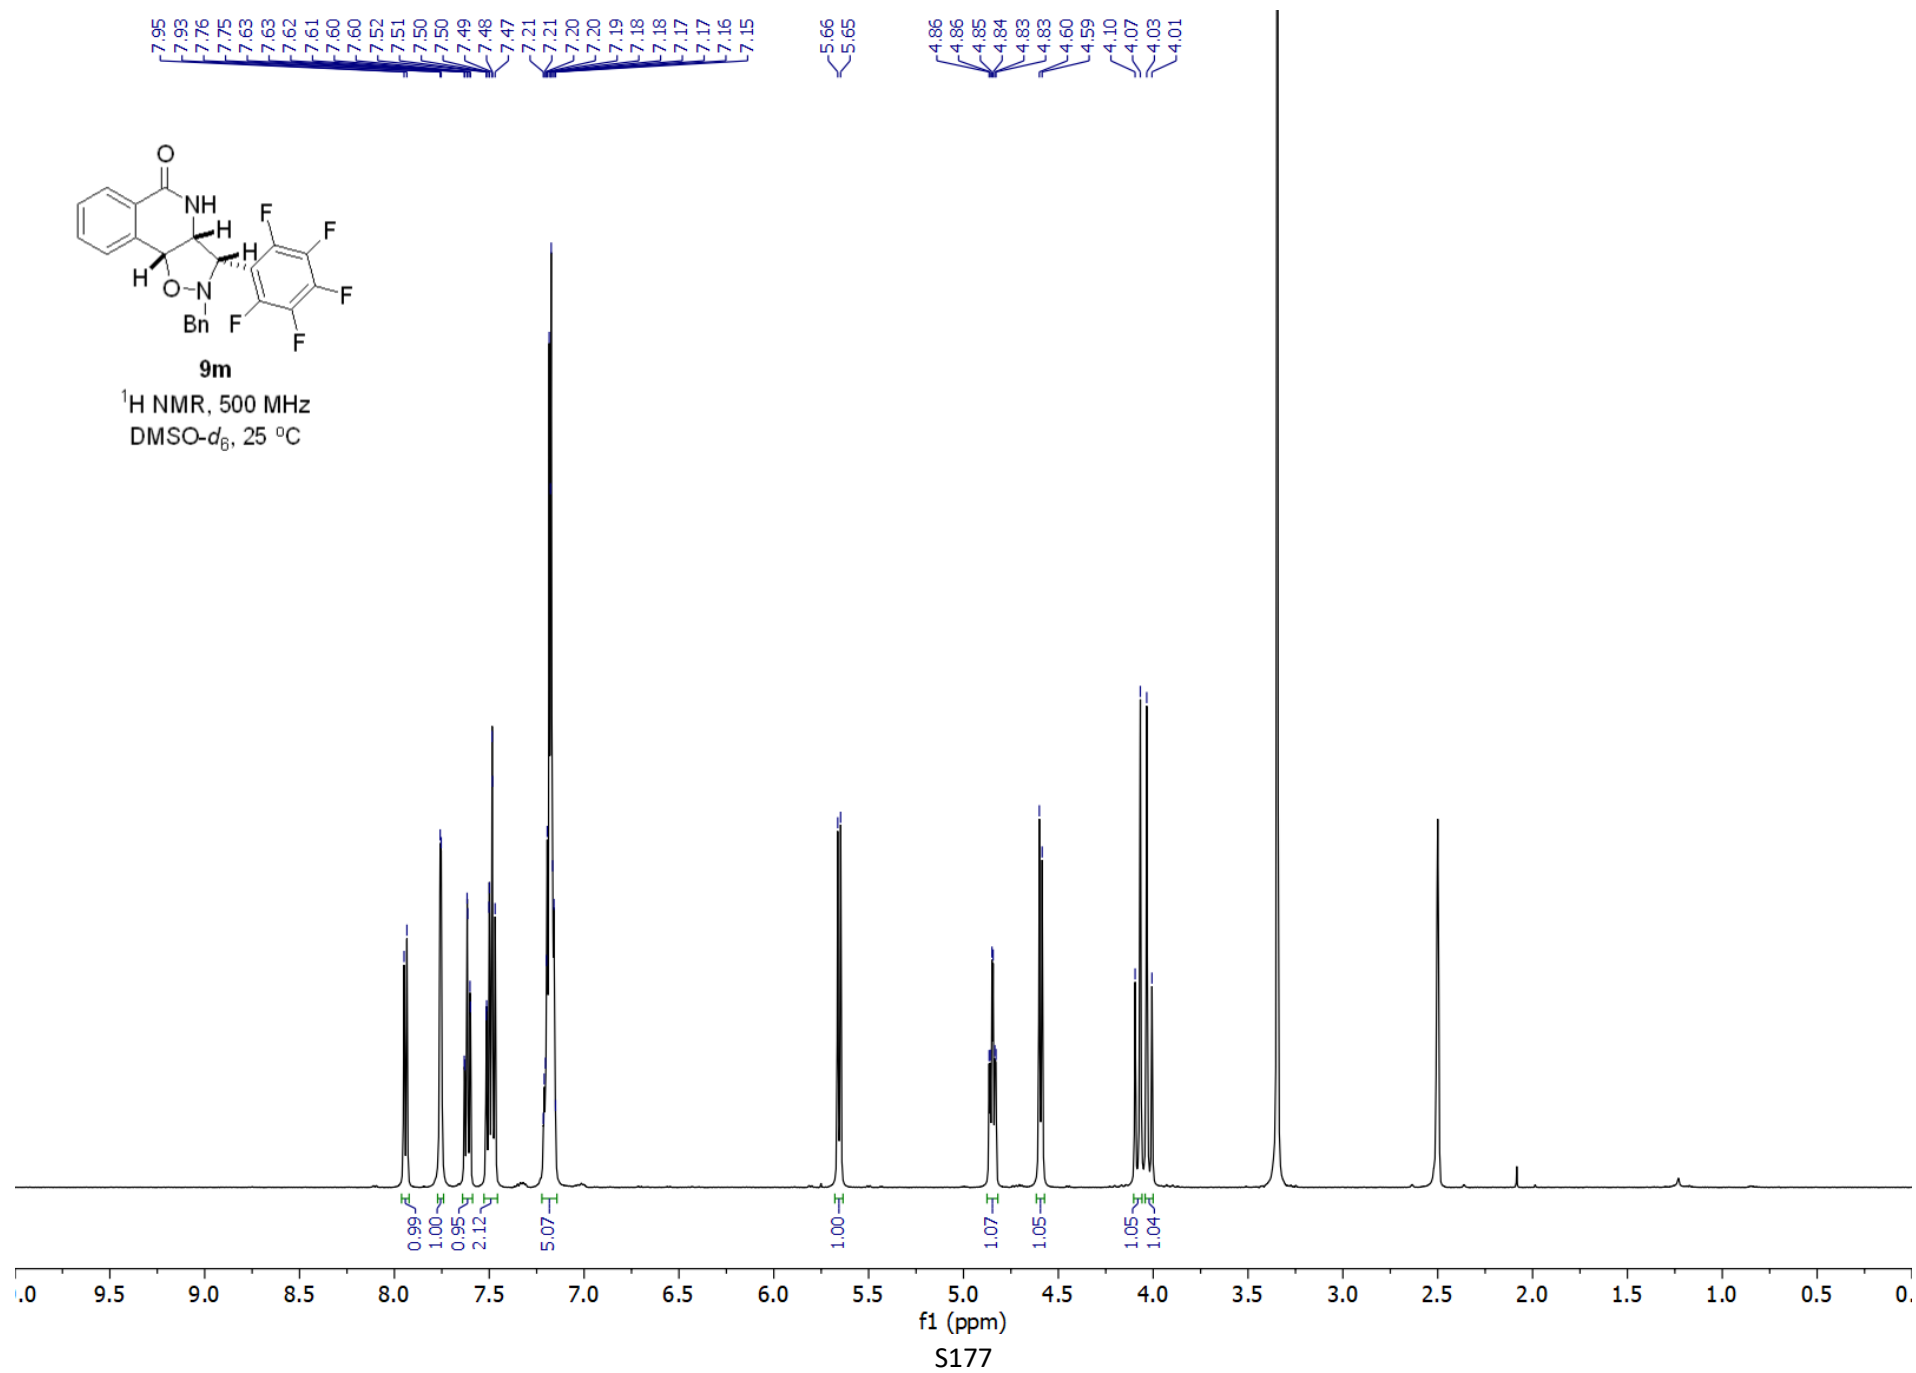

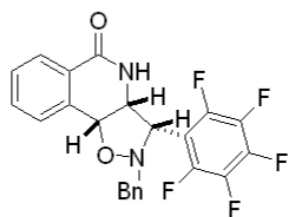

**9m**

$^{13}\text{C}$  NMR, 125 MHz  
DMSO- $d_6$ , 25 °C

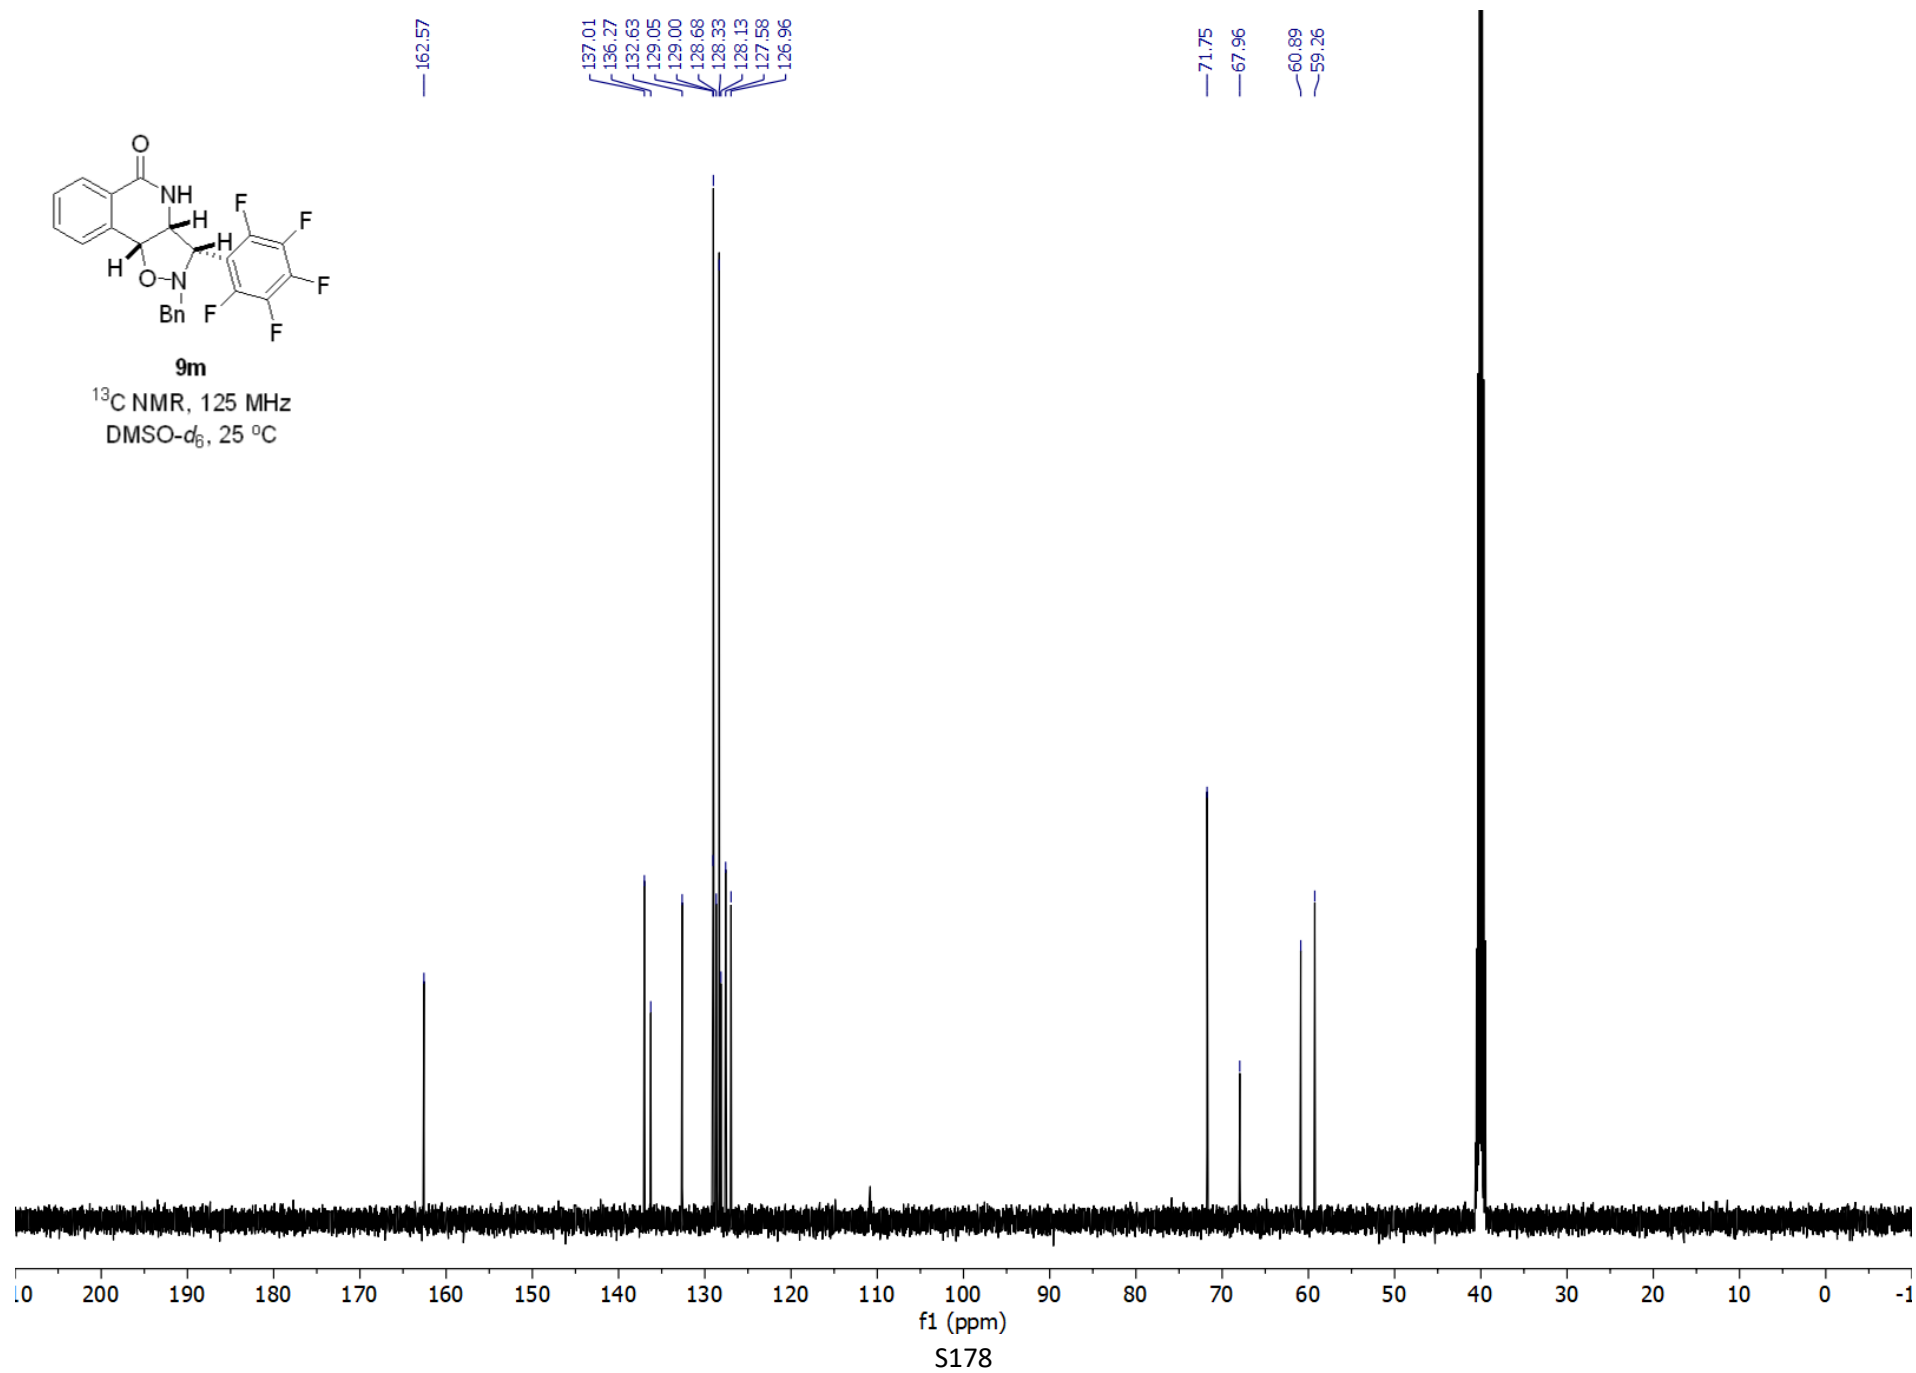

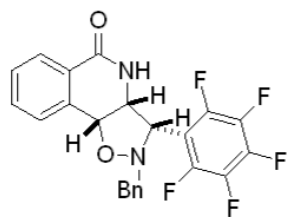

**9m**

$^{19}\text{F}$  NMR, 470 MHz  
DMSO- $d_6$ , 25 °C

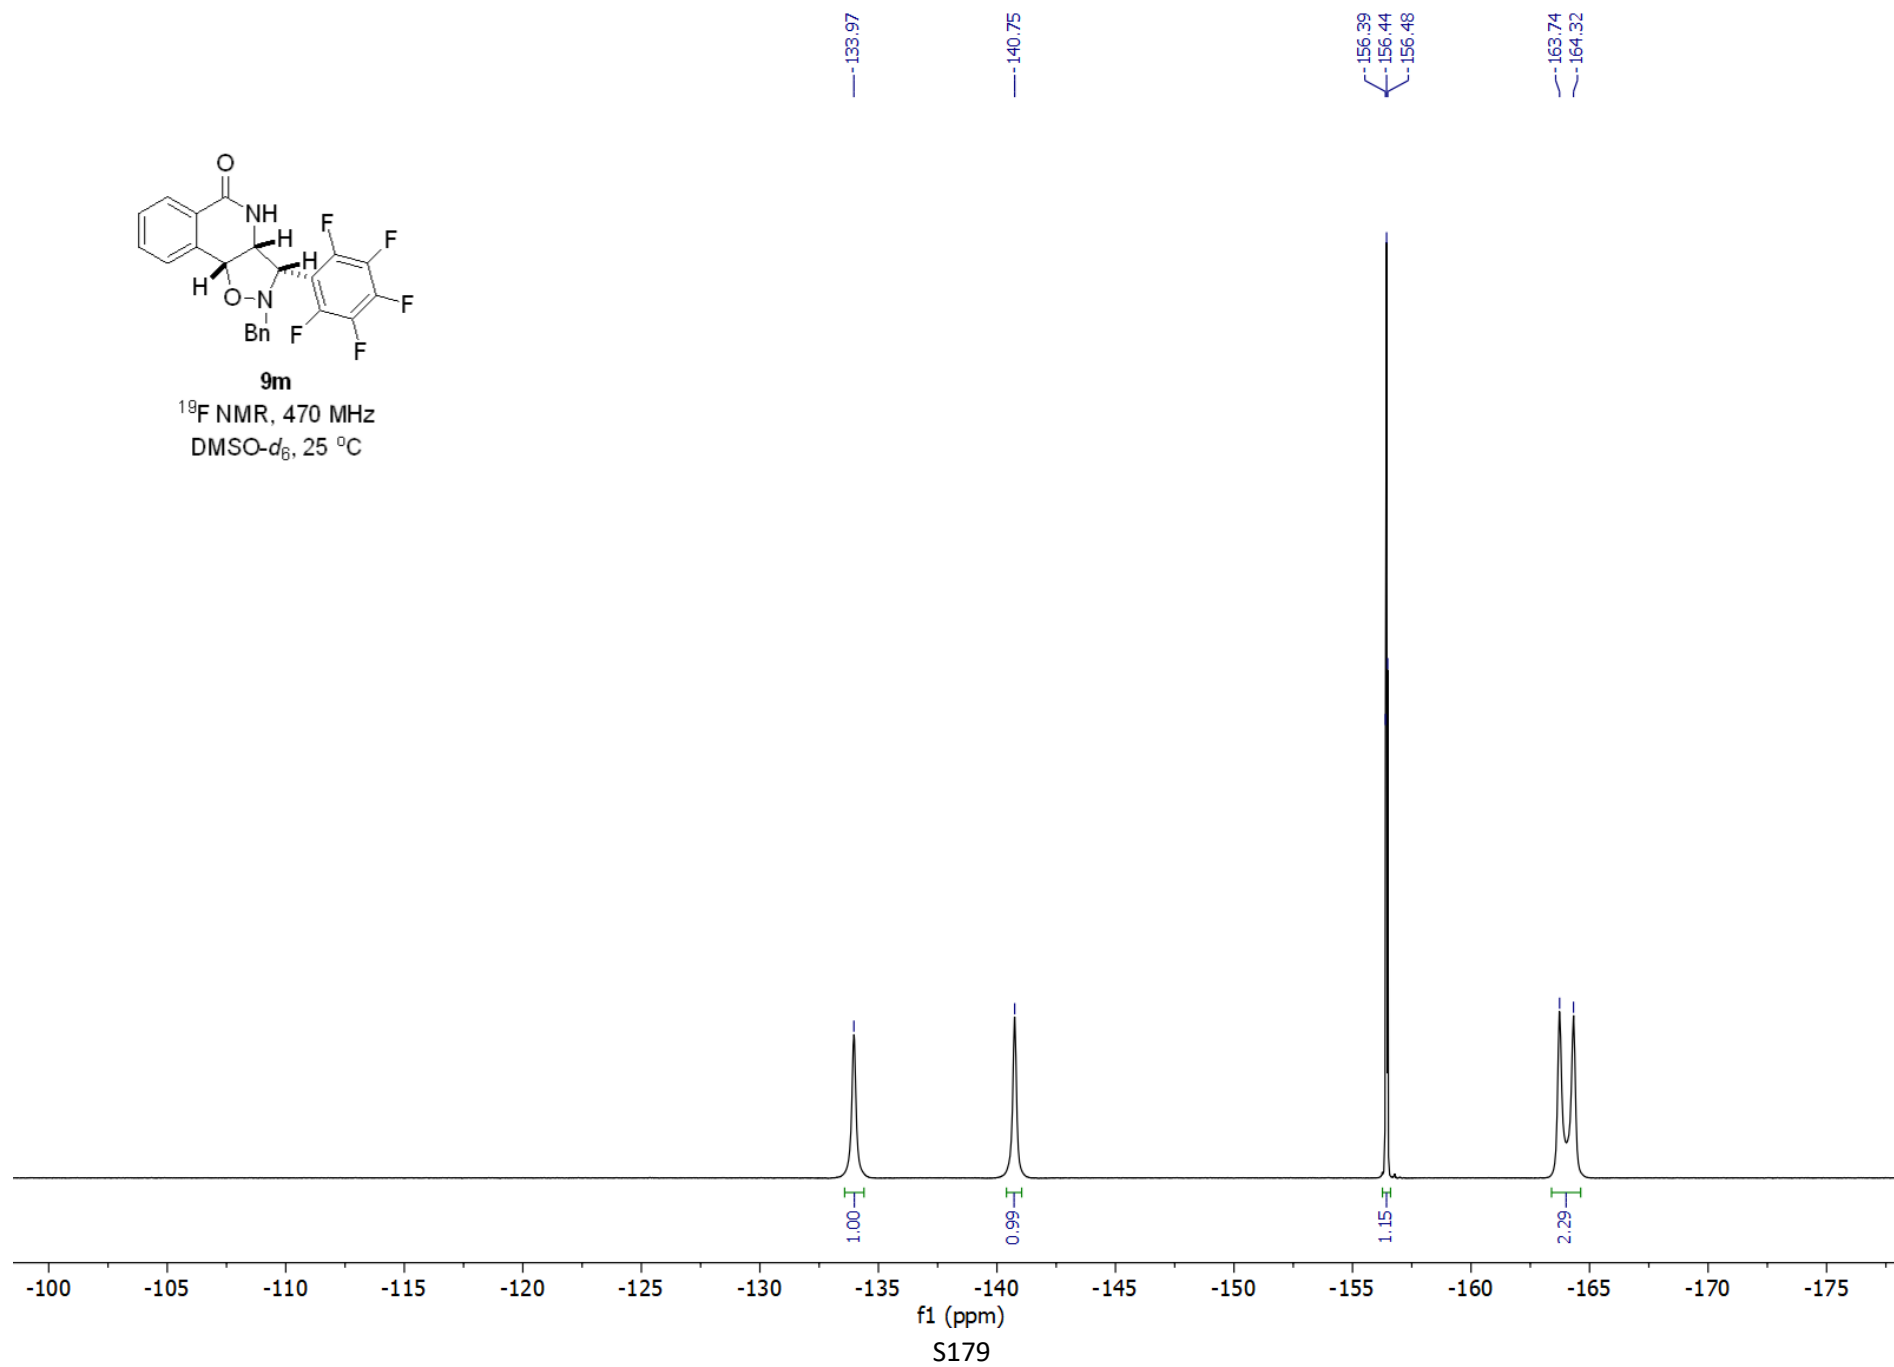

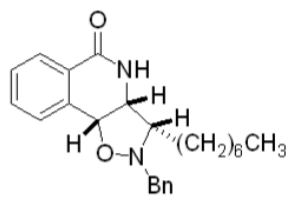

<sup>1</sup>H NMR, 500 MHz  
DMSO-*d*<sub>6</sub>, 25 °C

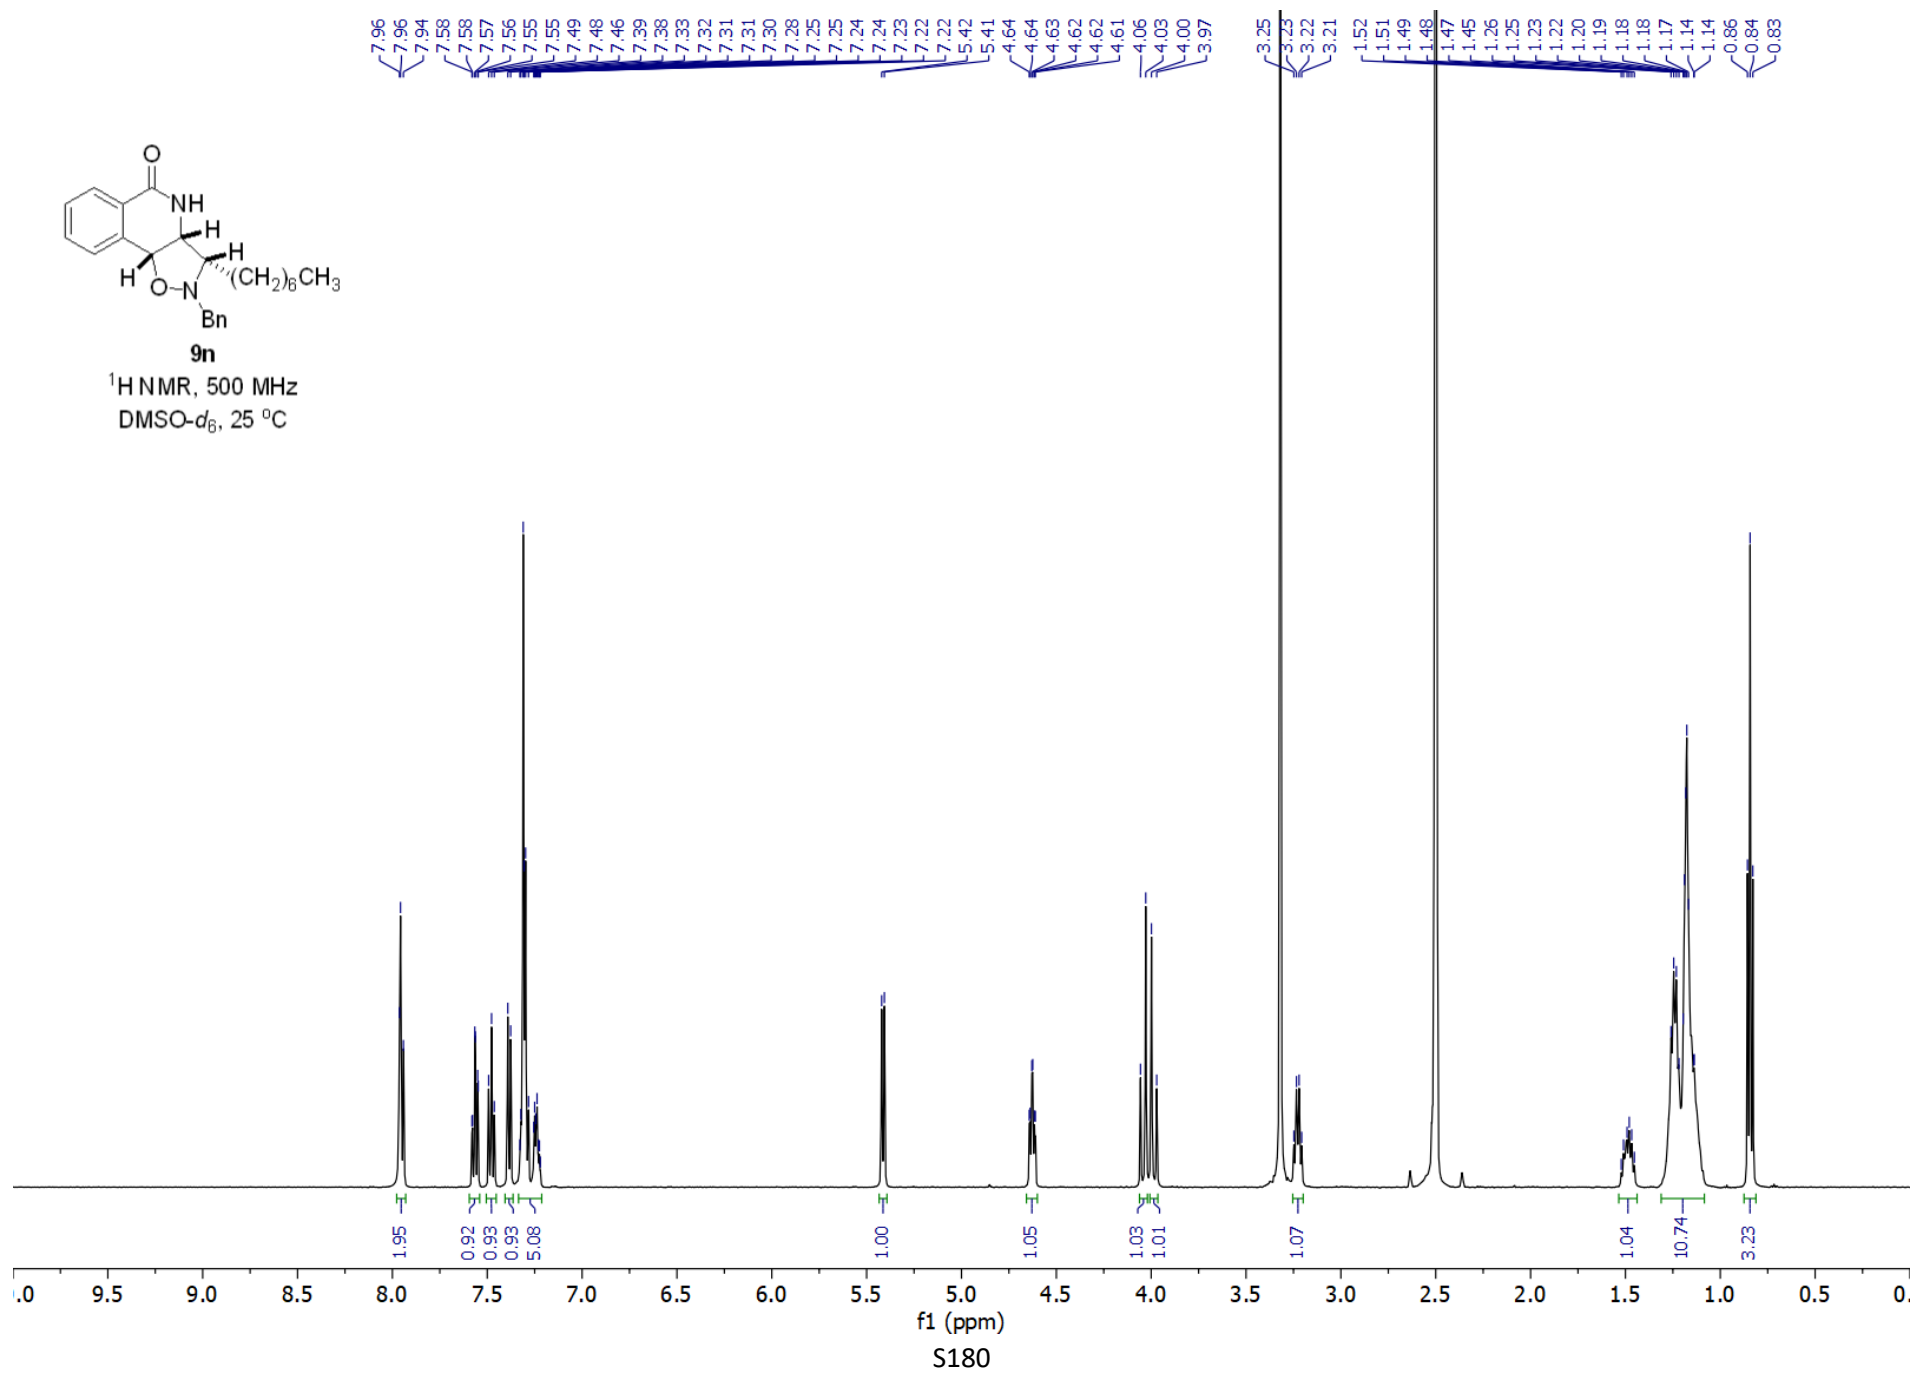

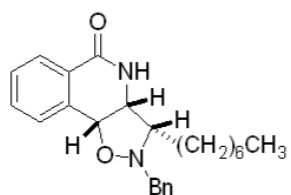

**9n**

$^{13}\text{C}$  NMR, 125 MHz  
DMSO- $d_6$ , 25 °C

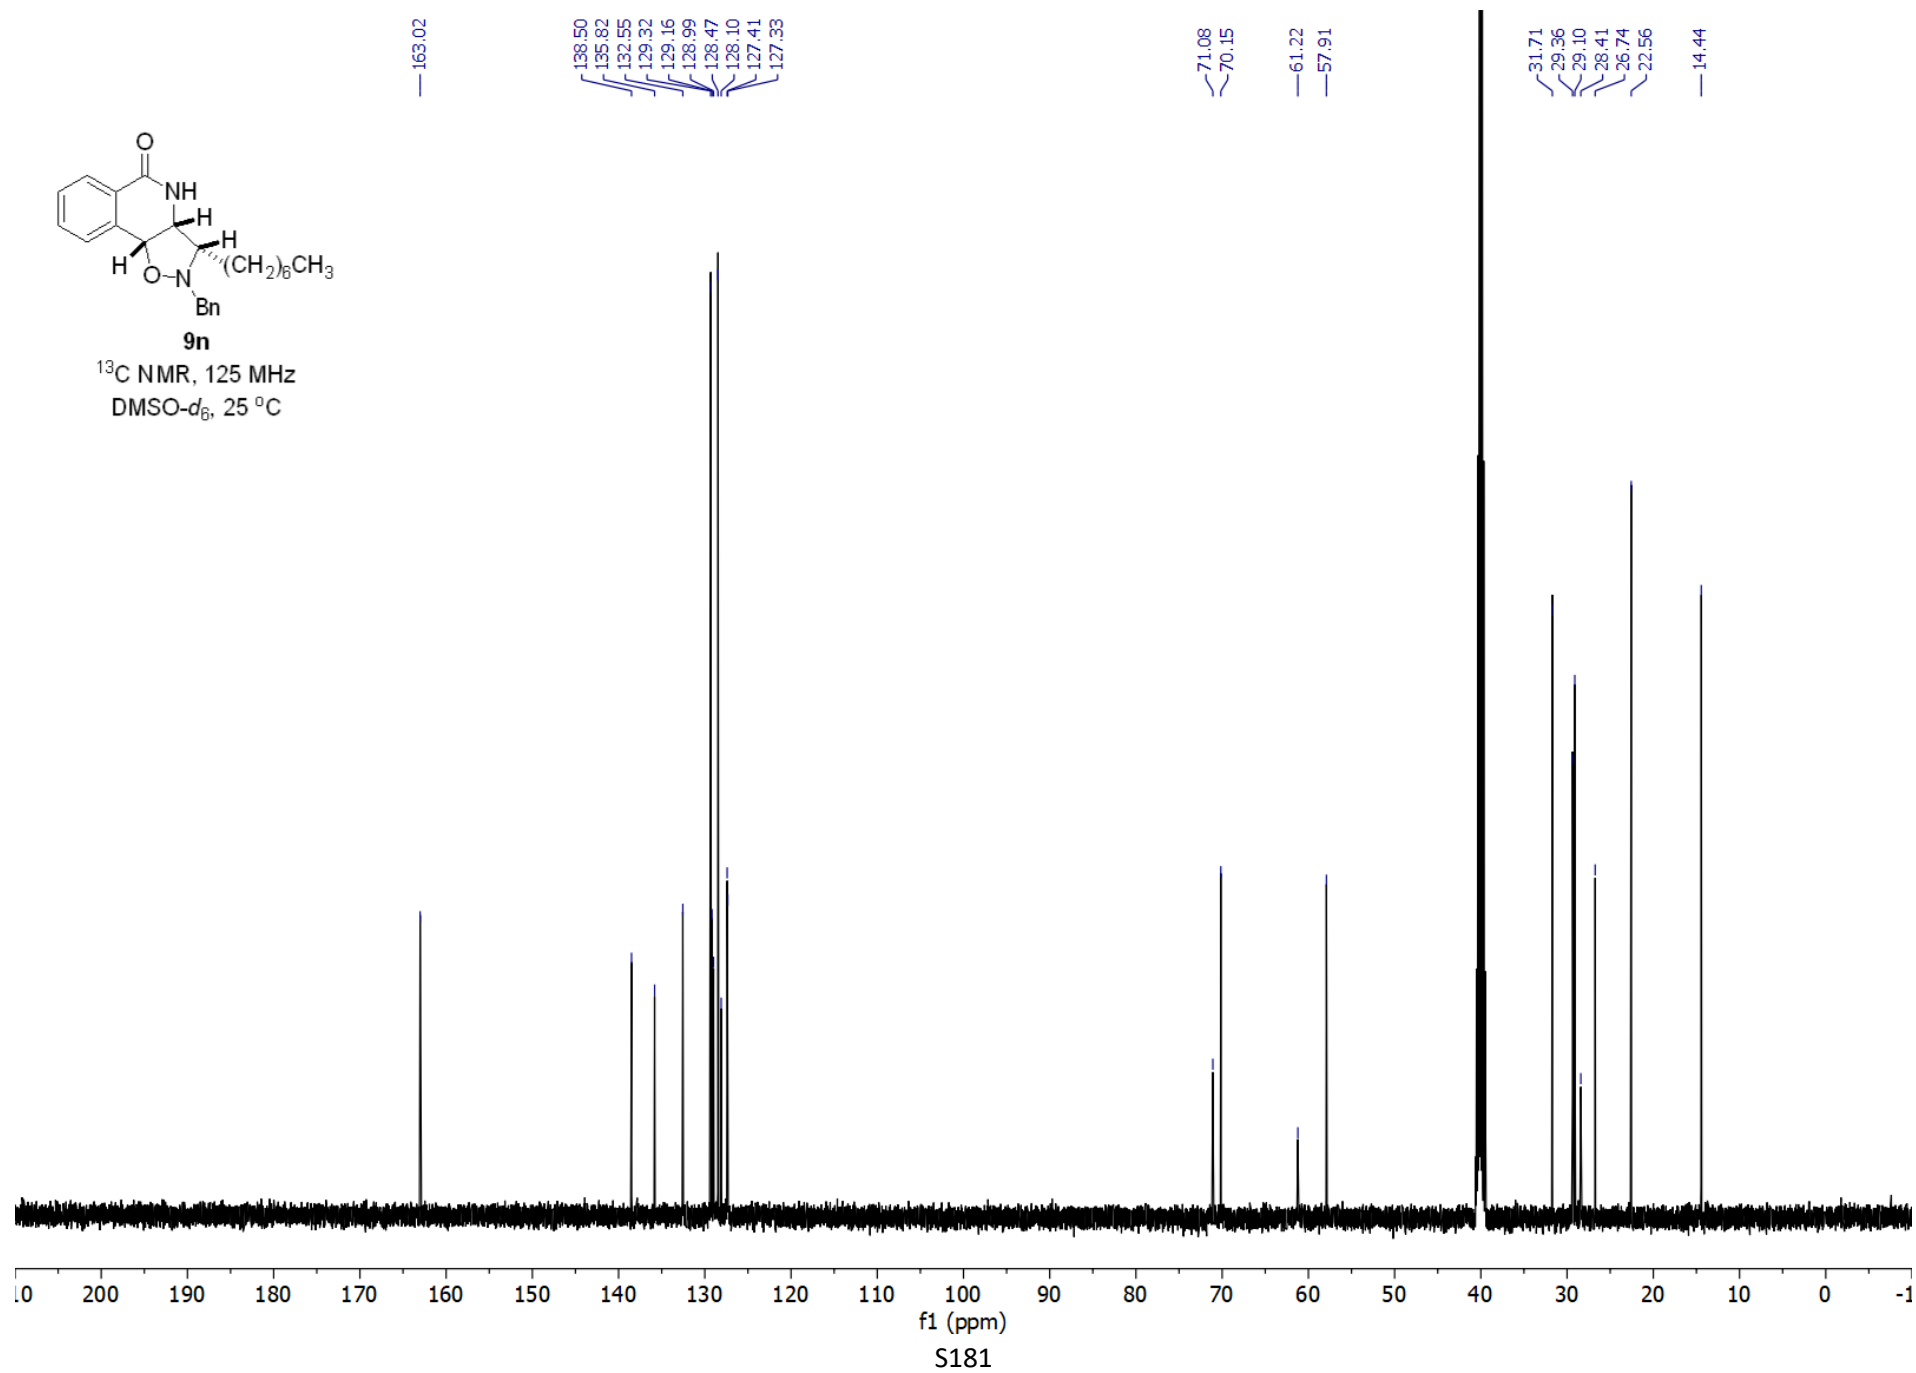

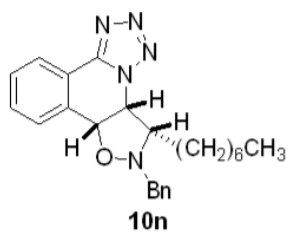

$^1\text{H}$  NMR, 500 MHz  
 $\text{CDCl}_3$ , 25  $^\circ\text{C}$

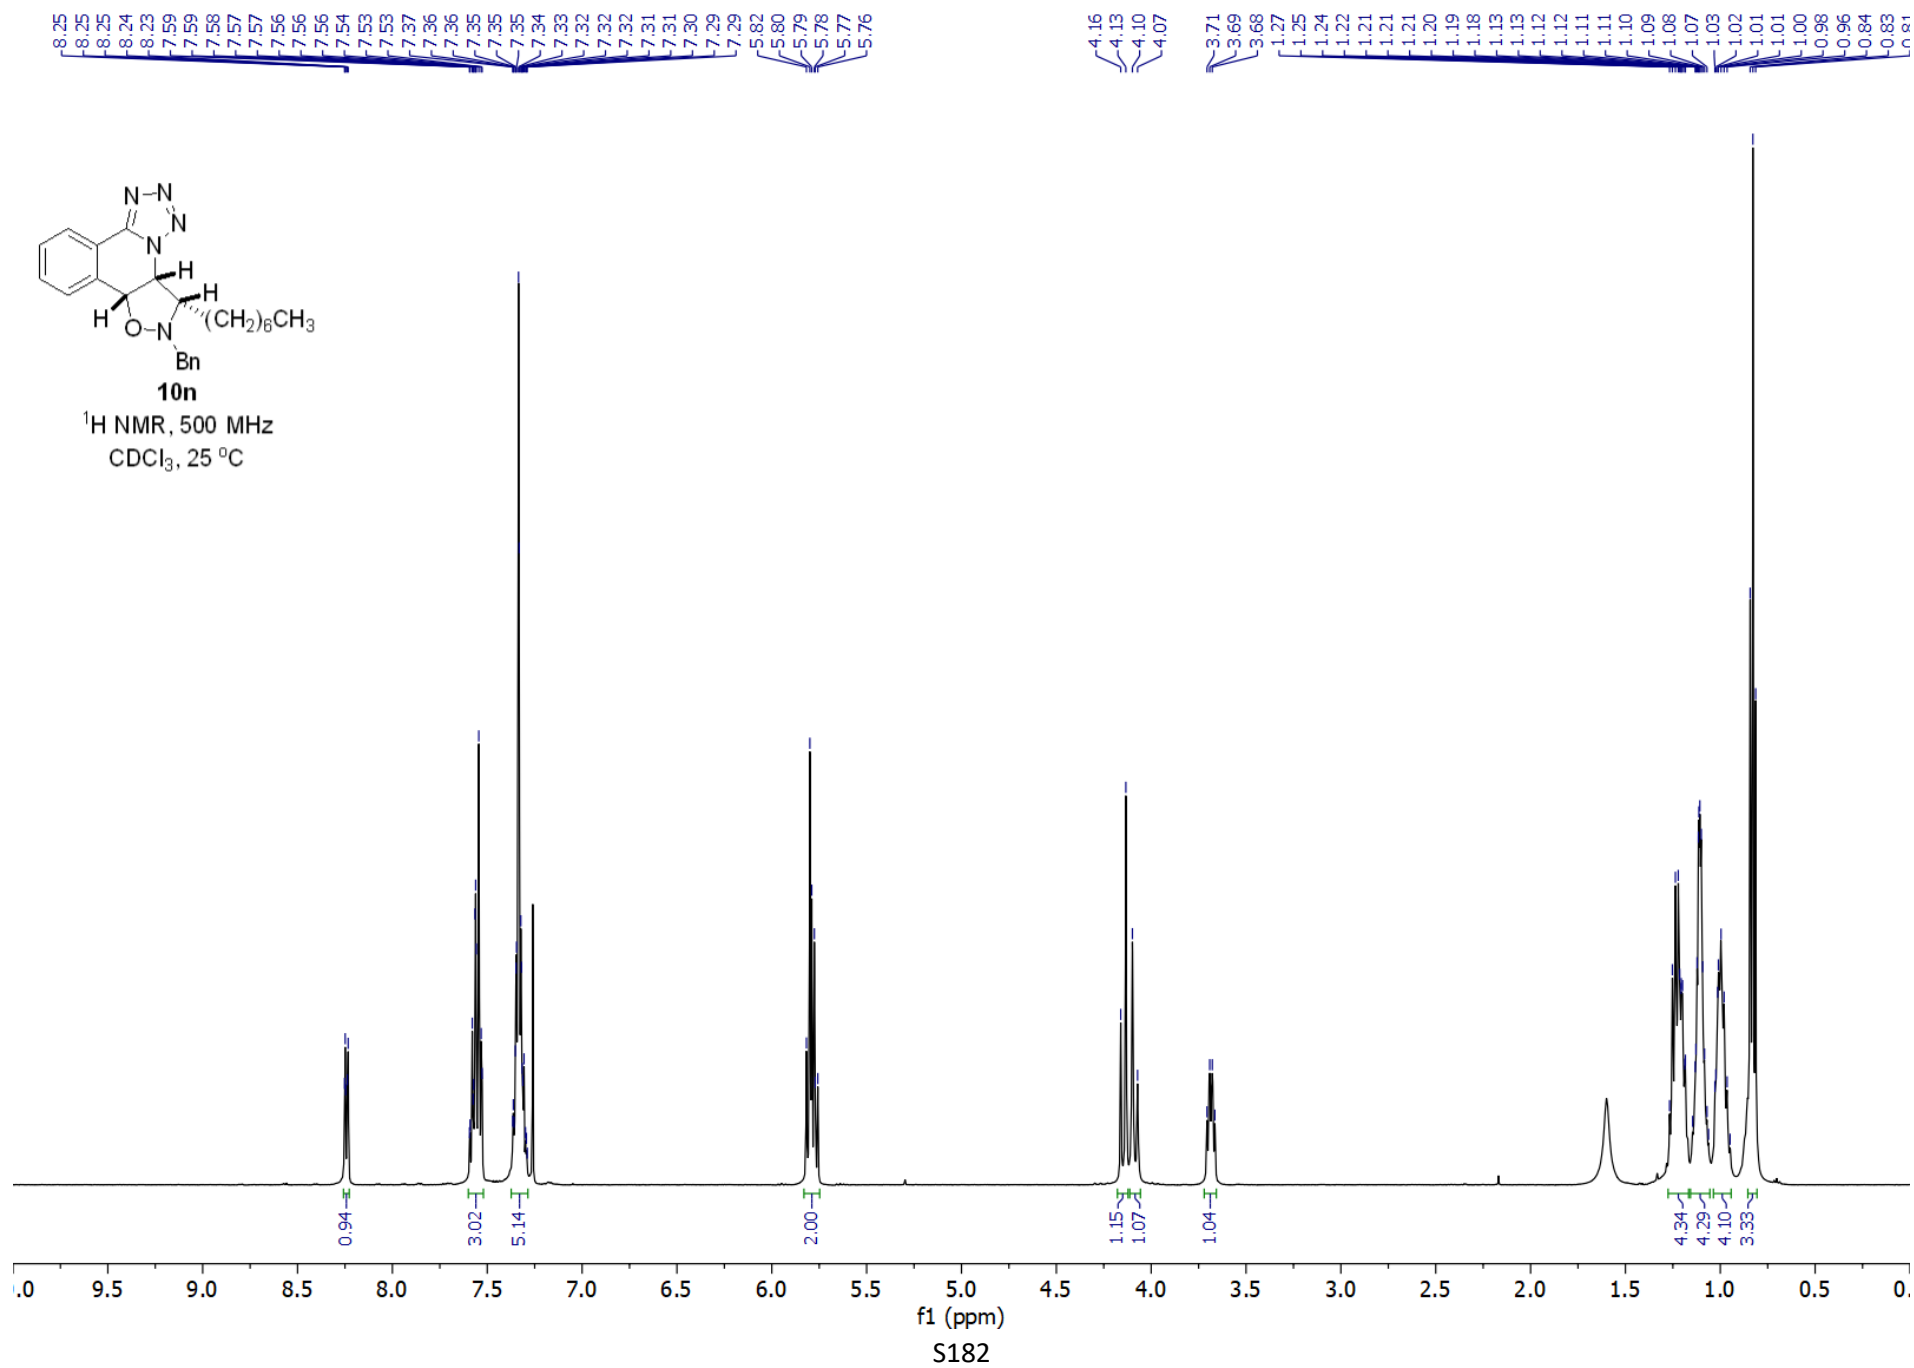

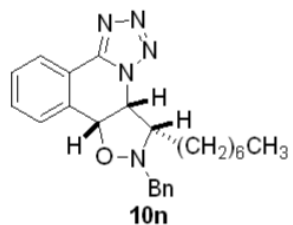

$^{13}\text{C}$  NMR, 125 MHz  
 $\text{CDCl}_3$ , 25  $^\circ\text{C}$

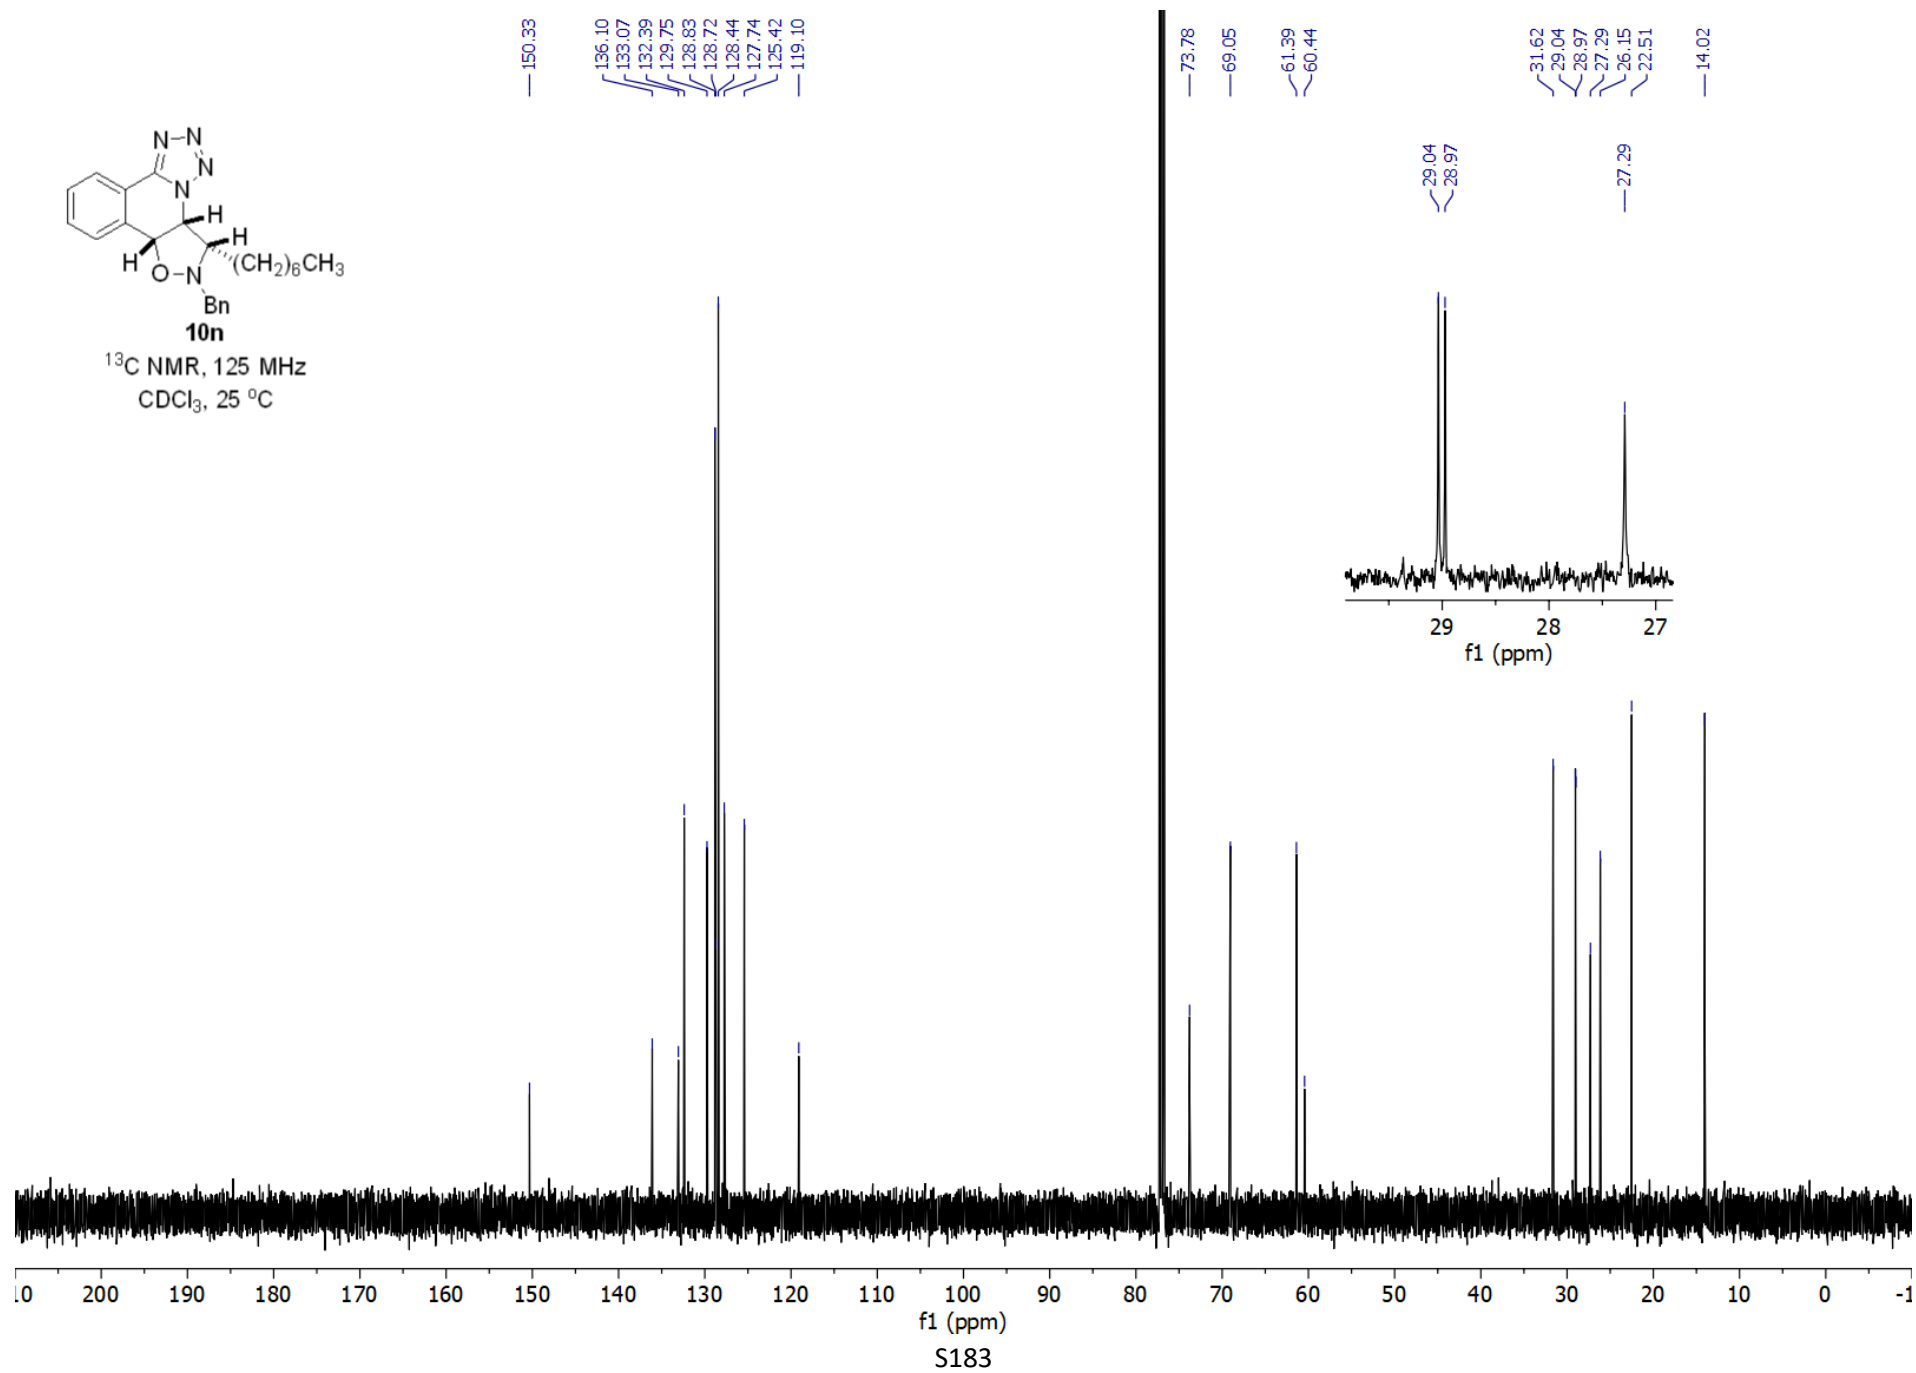

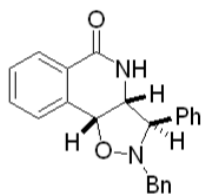

**12a**

$^1\text{H}$  NMR, 500 MHz  
DMSO- $d_6$ , 60  $^\circ\text{C}$

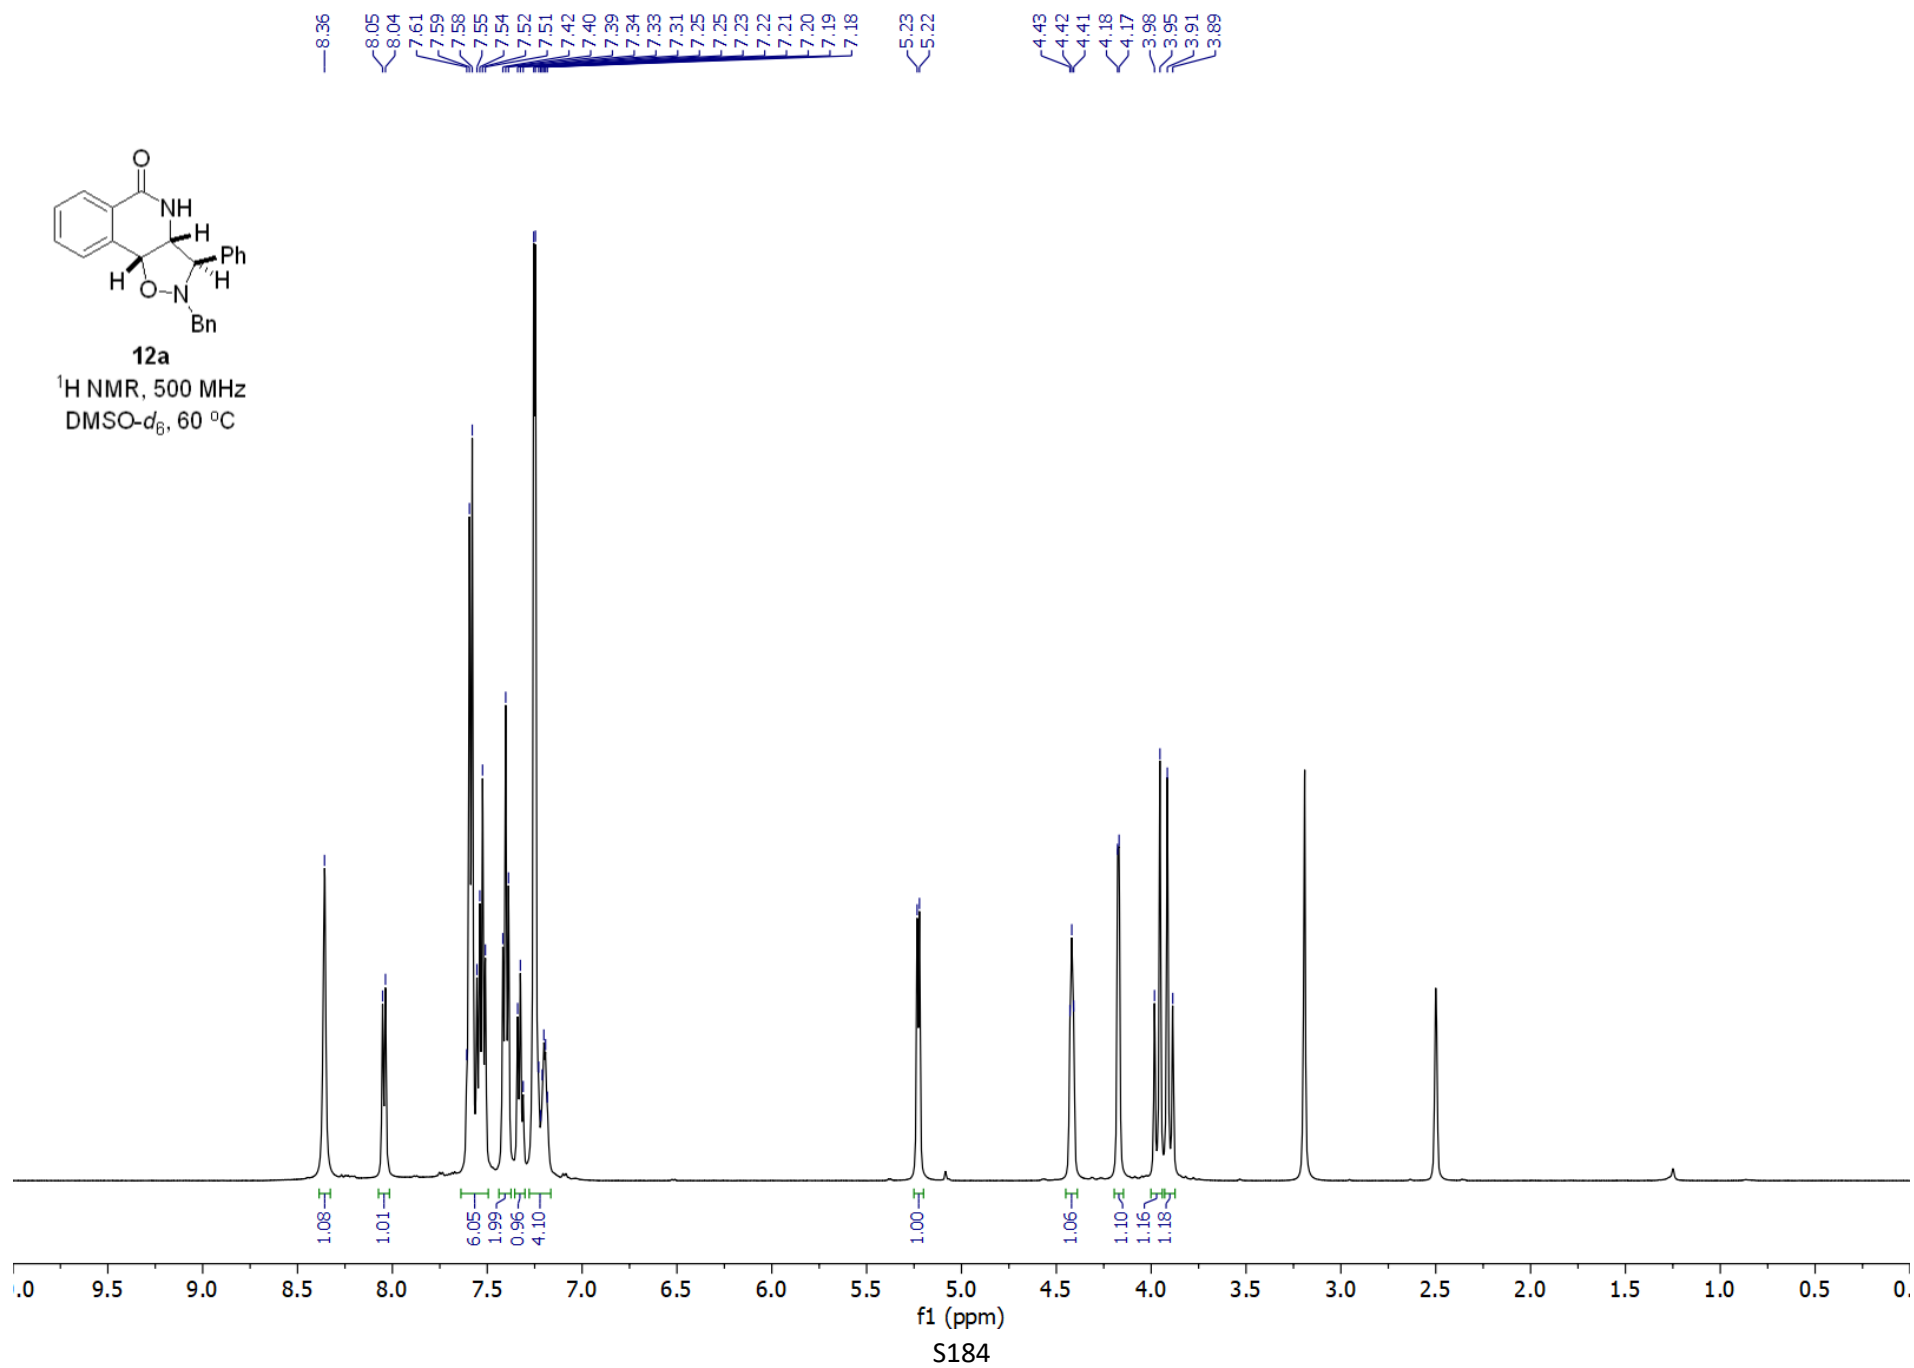

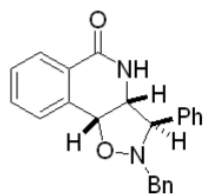

**12a**

$^{13}\text{C}$  NMR, 125 MHz  
DMSO- $d_6$ , 60  $^{\circ}\text{C}$

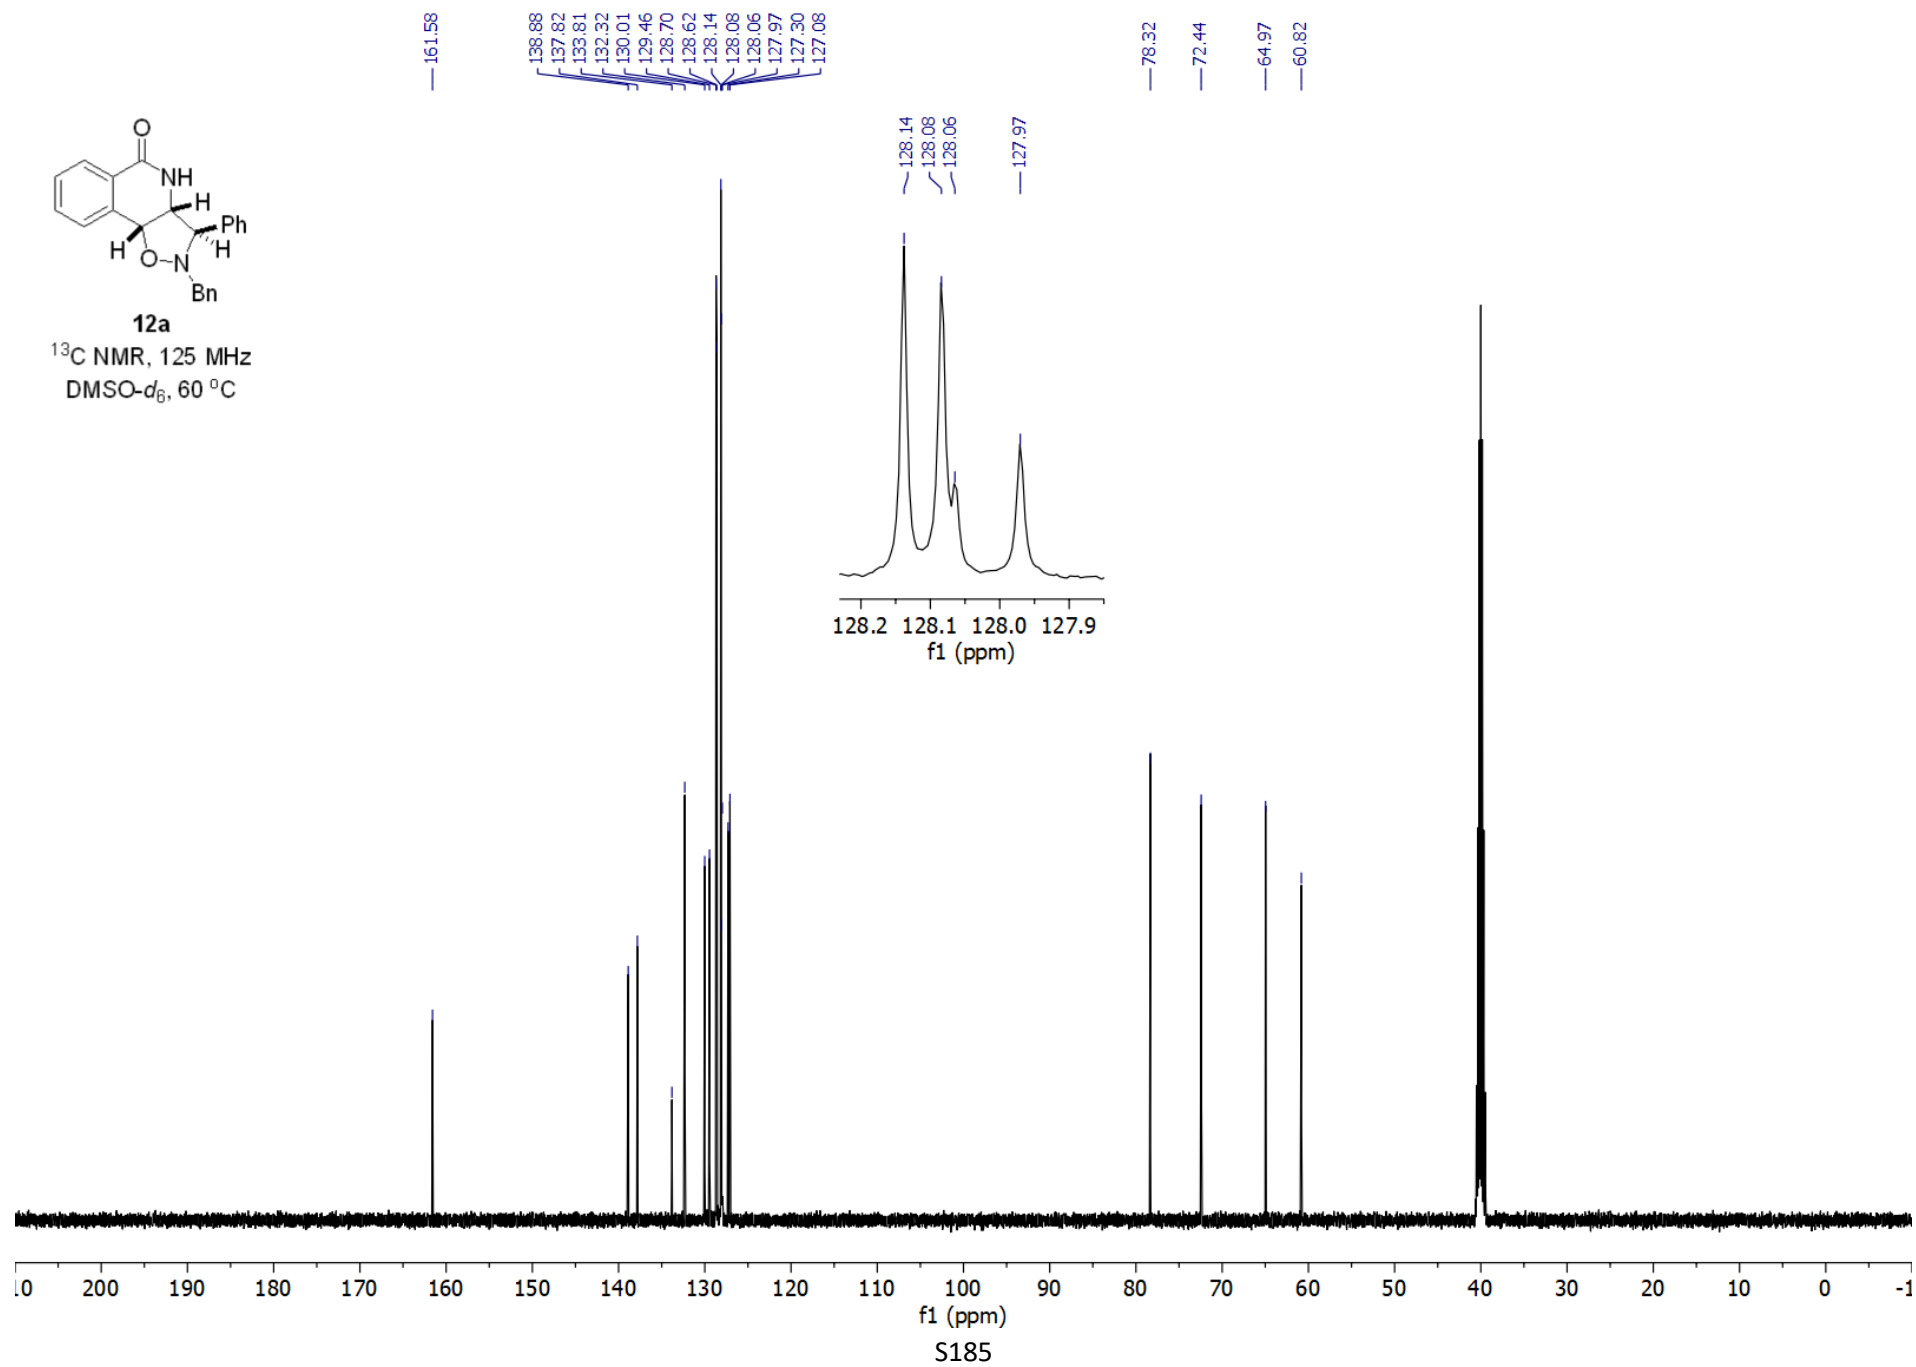

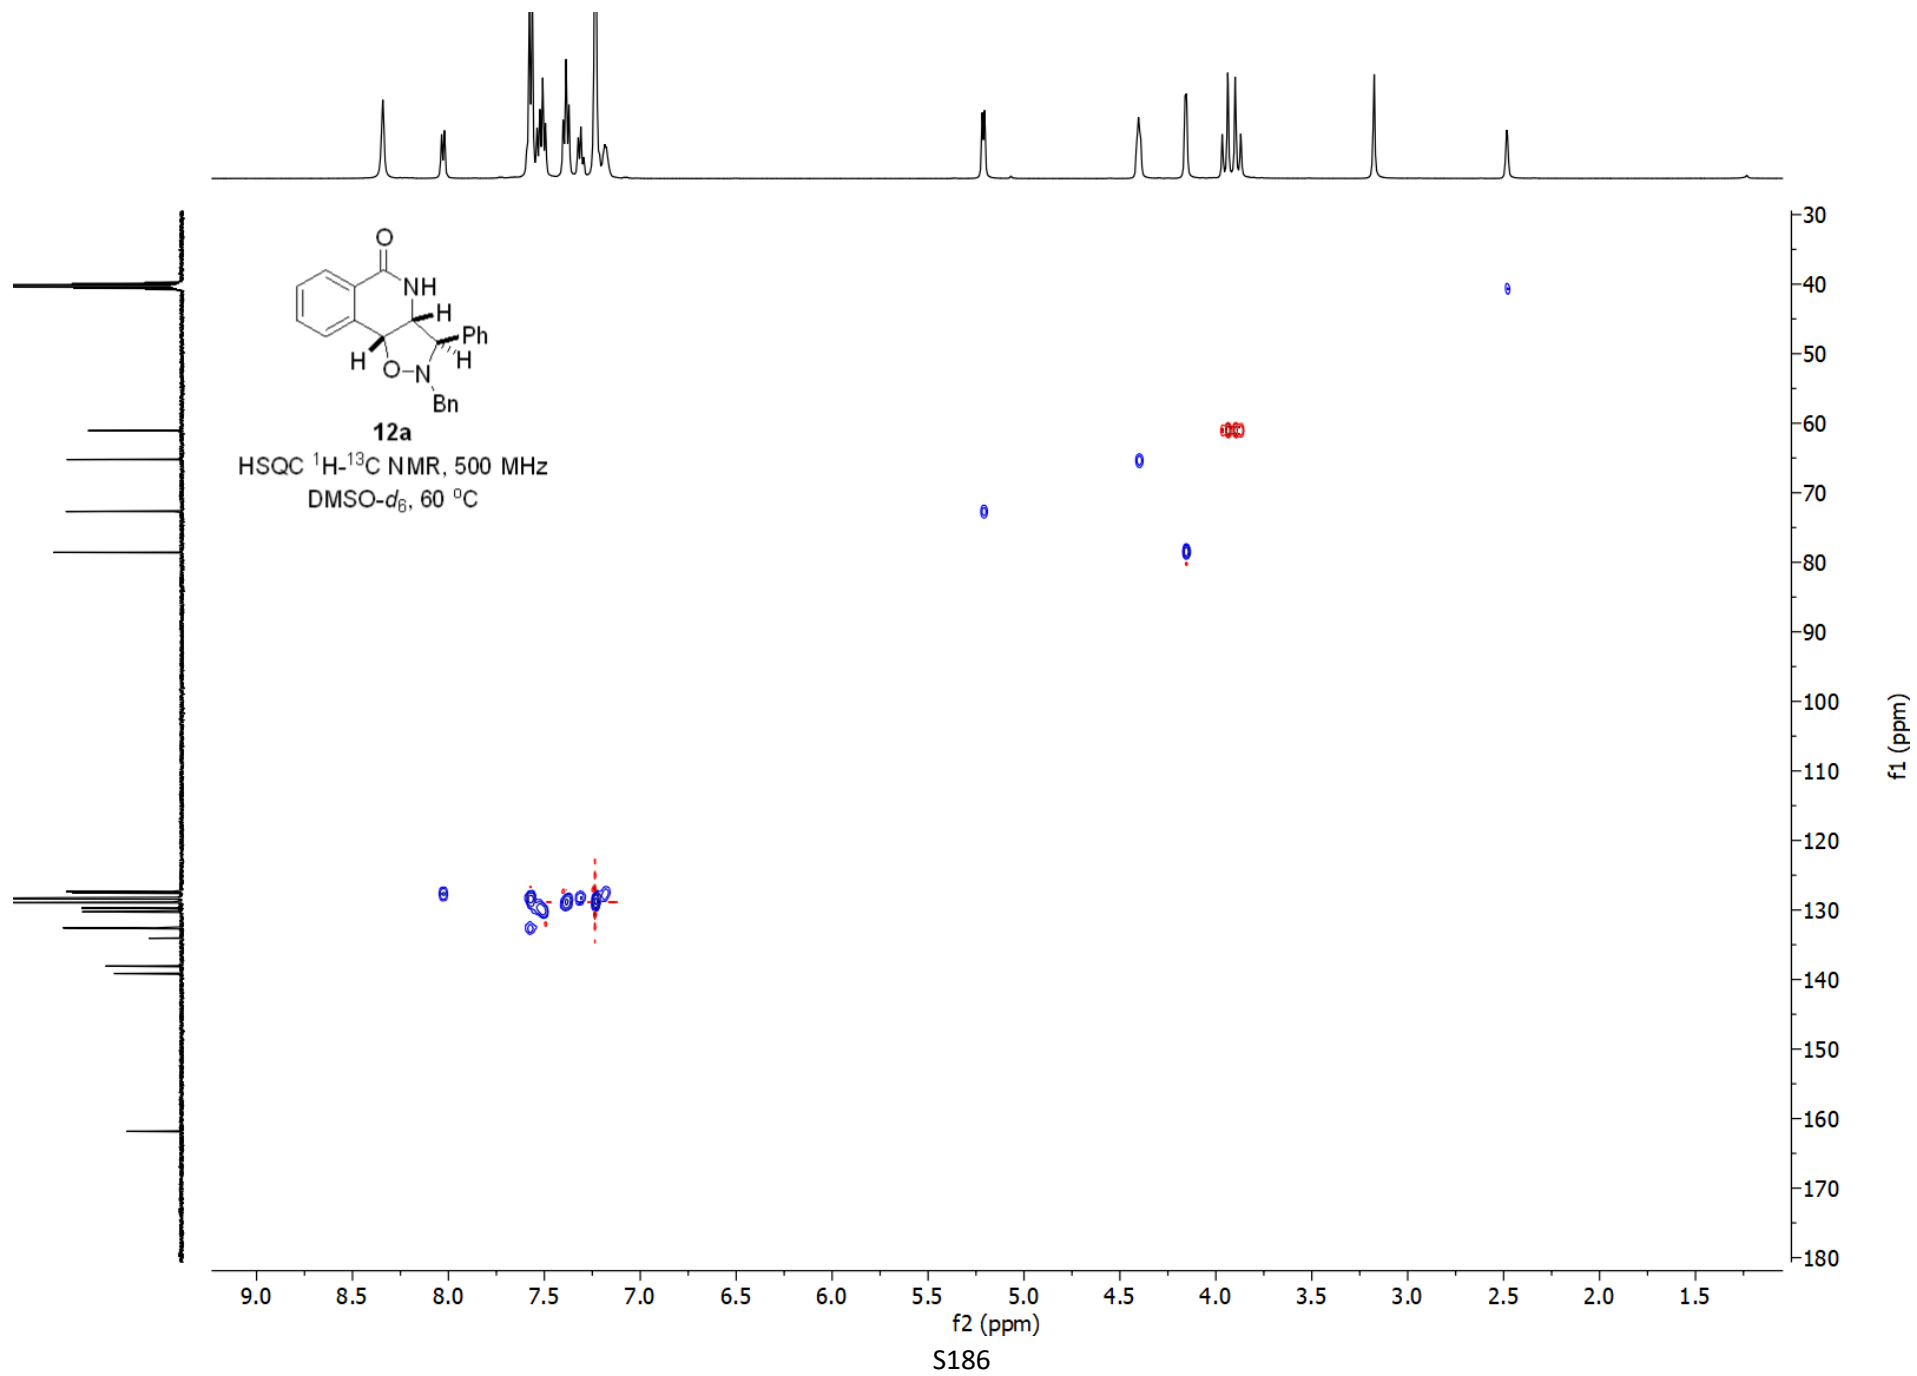

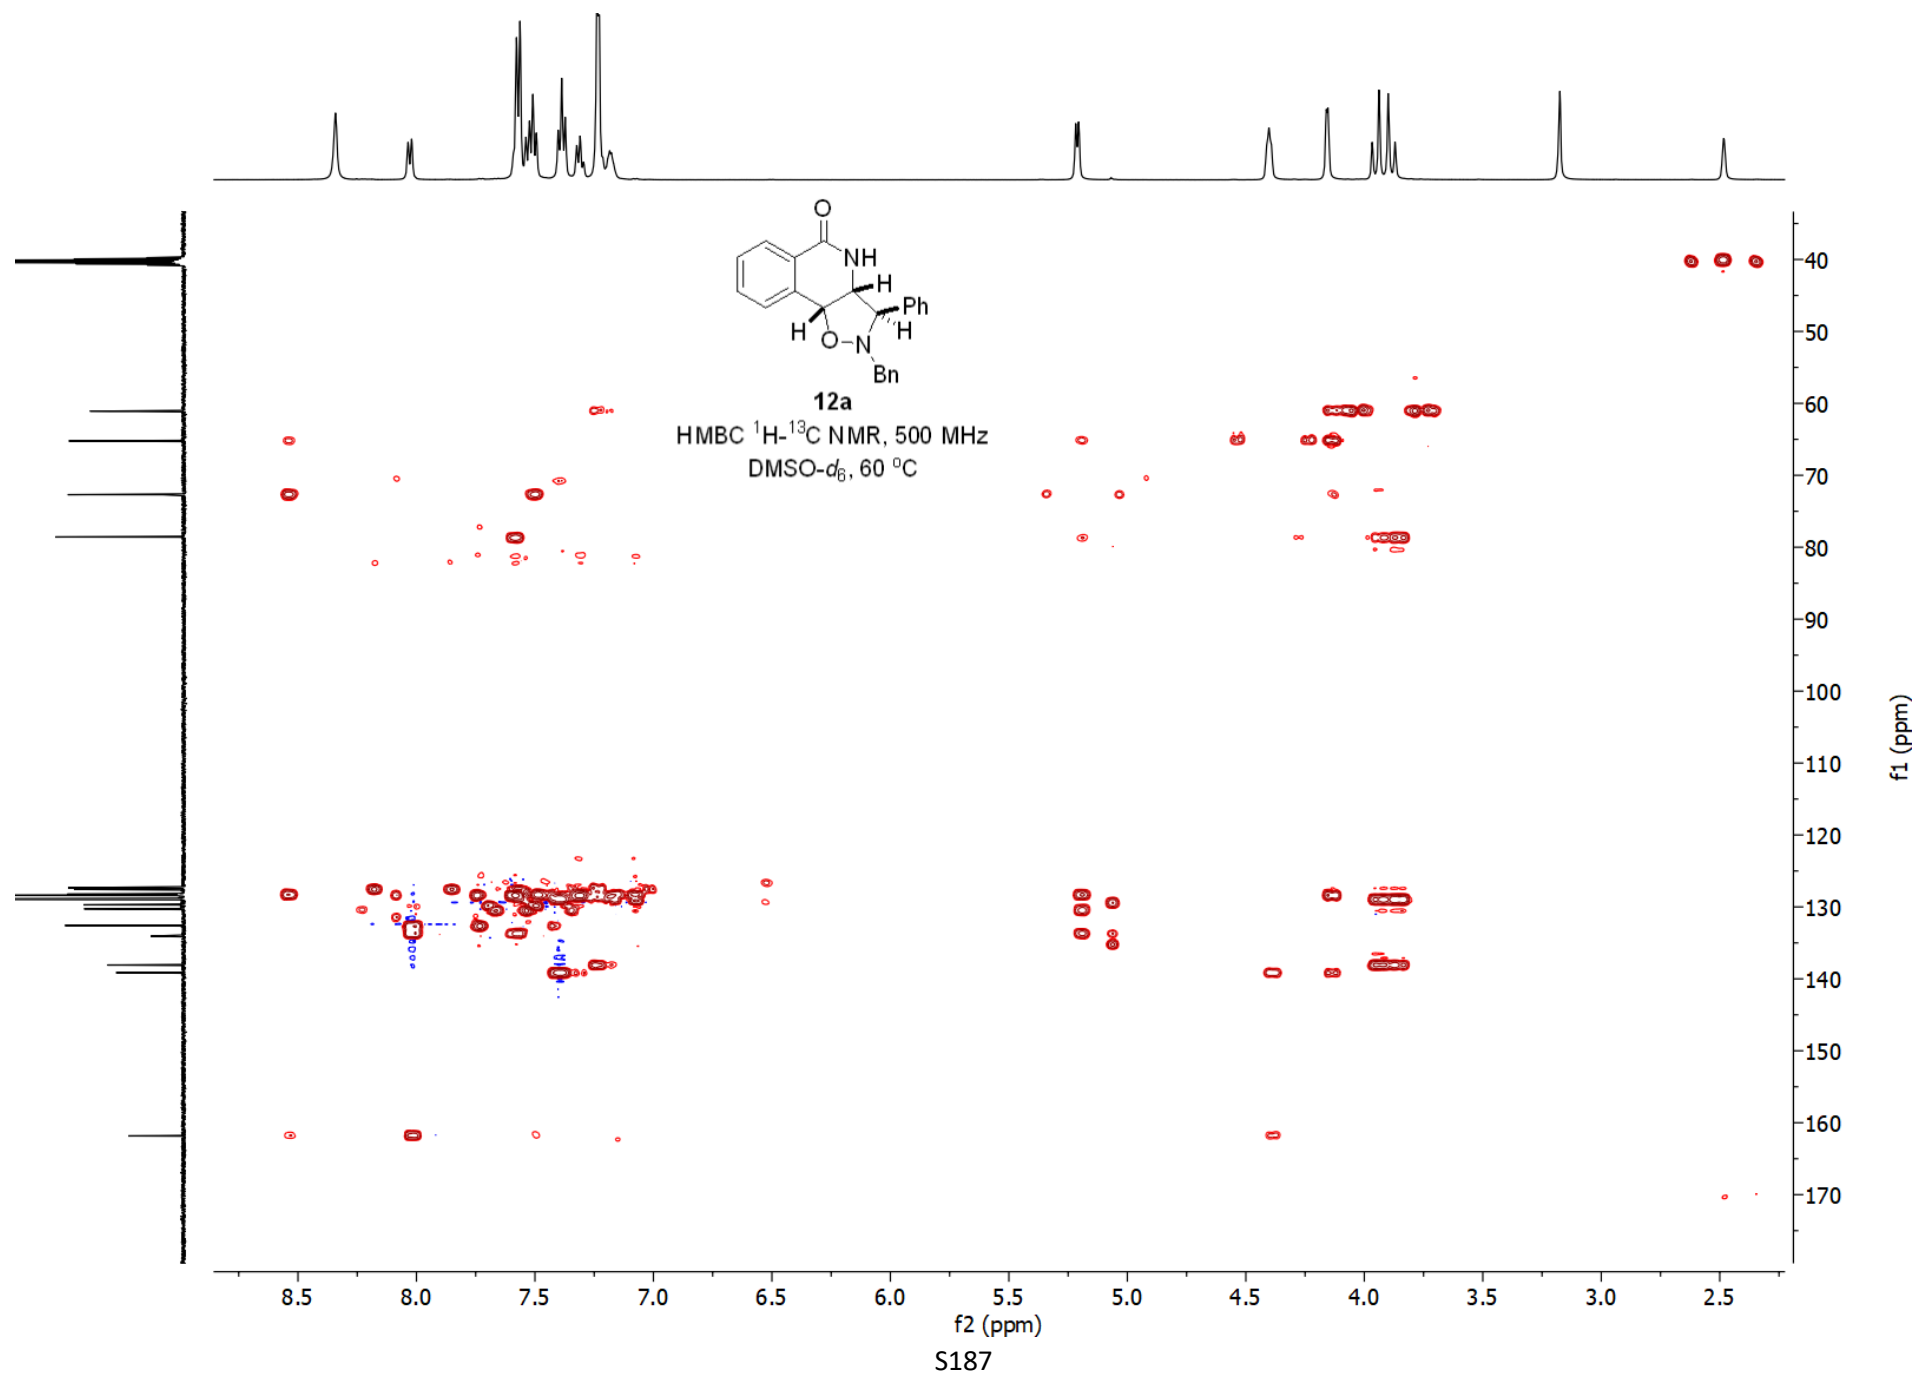

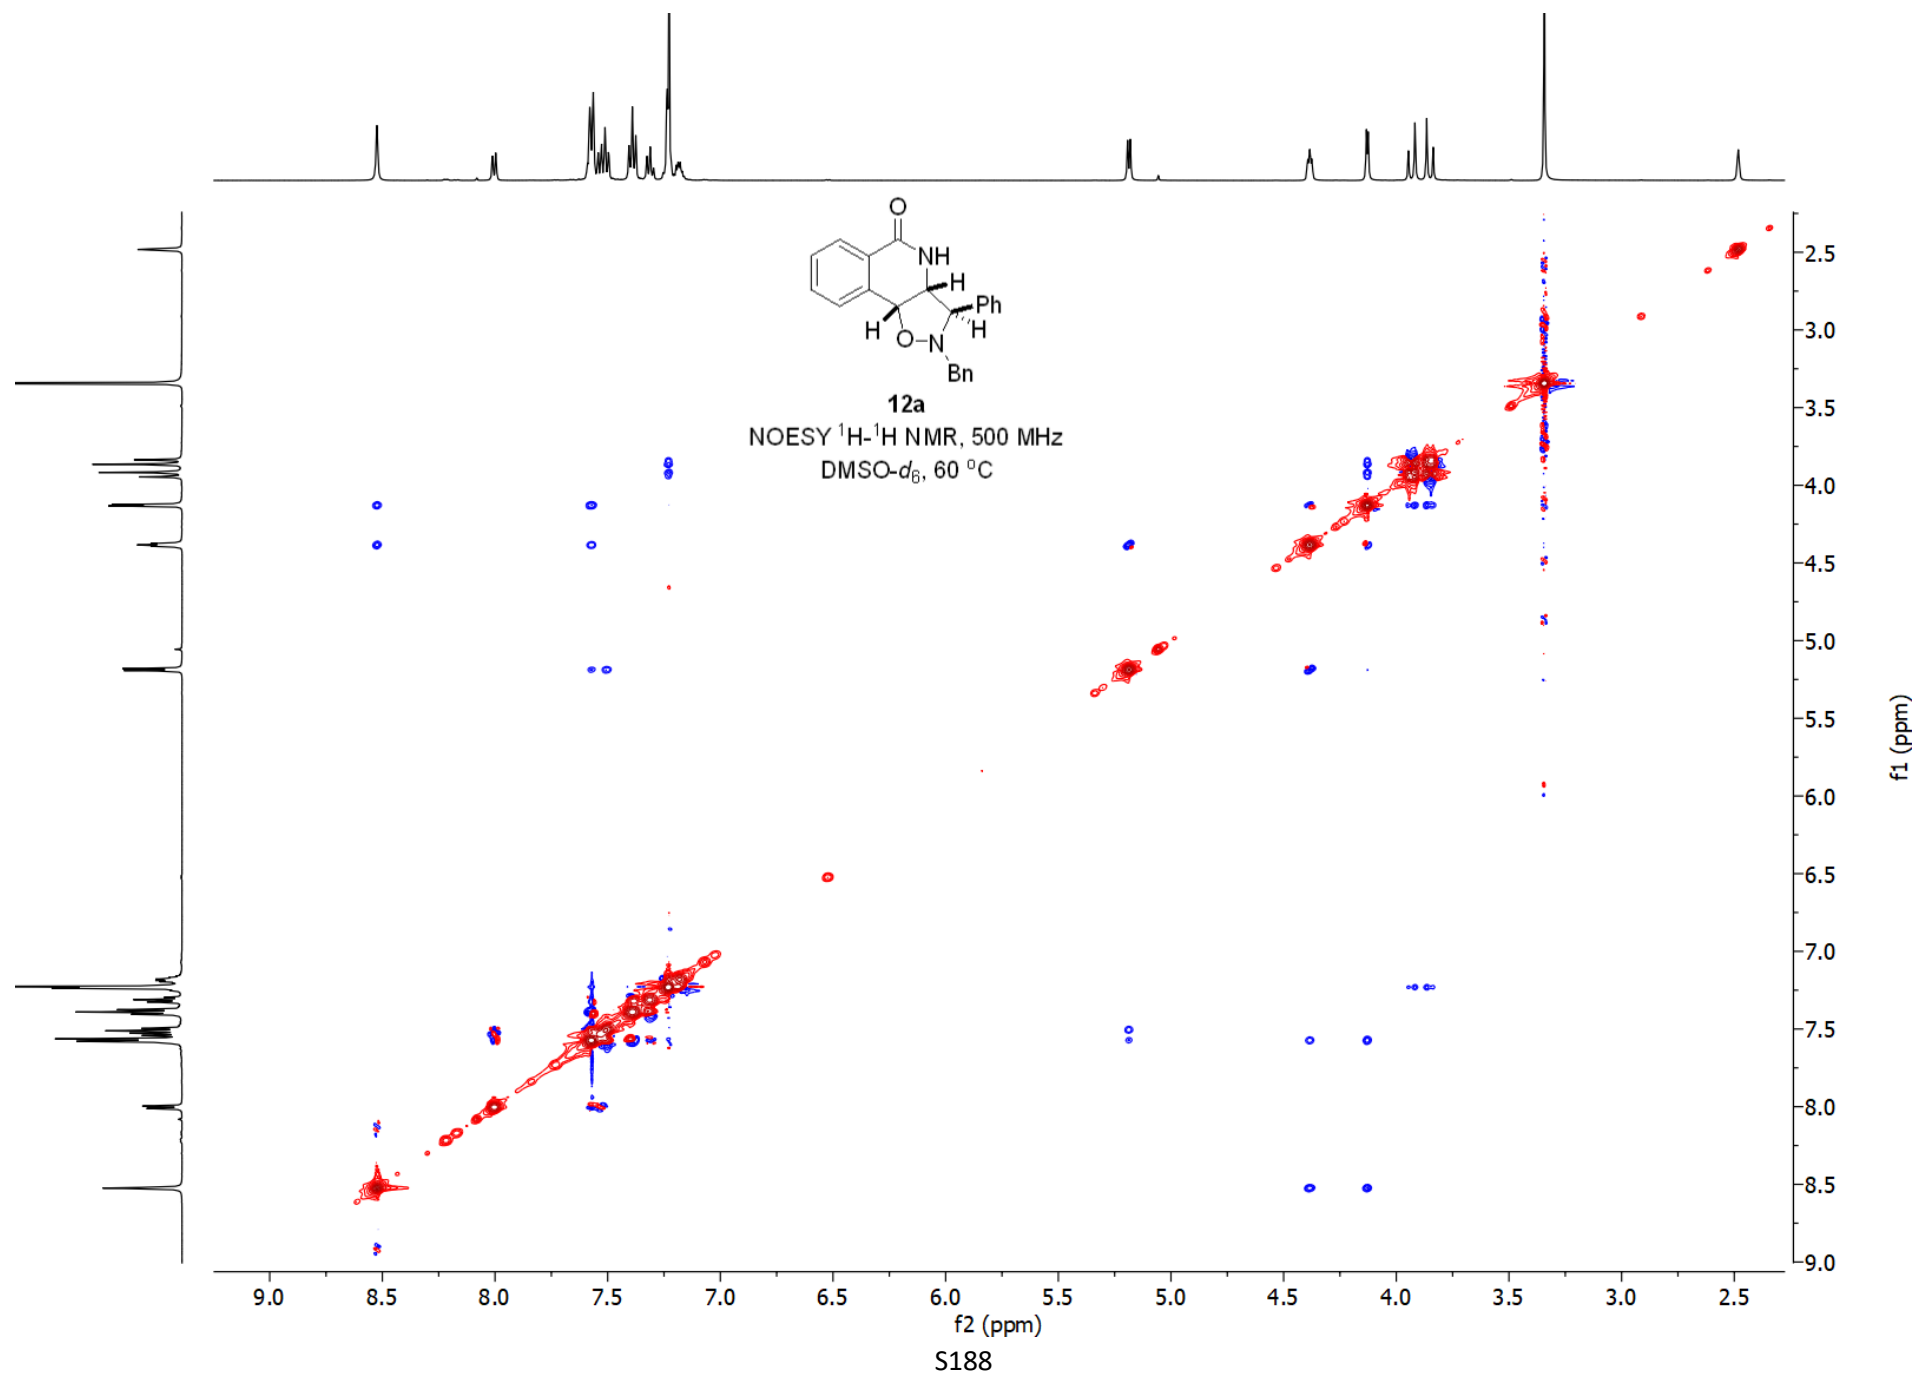

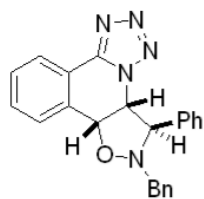

**13a**

$^1\text{H}$  NMR, 500 MHz  
 $\text{CDCl}_3$ , 25  $^\circ\text{C}$

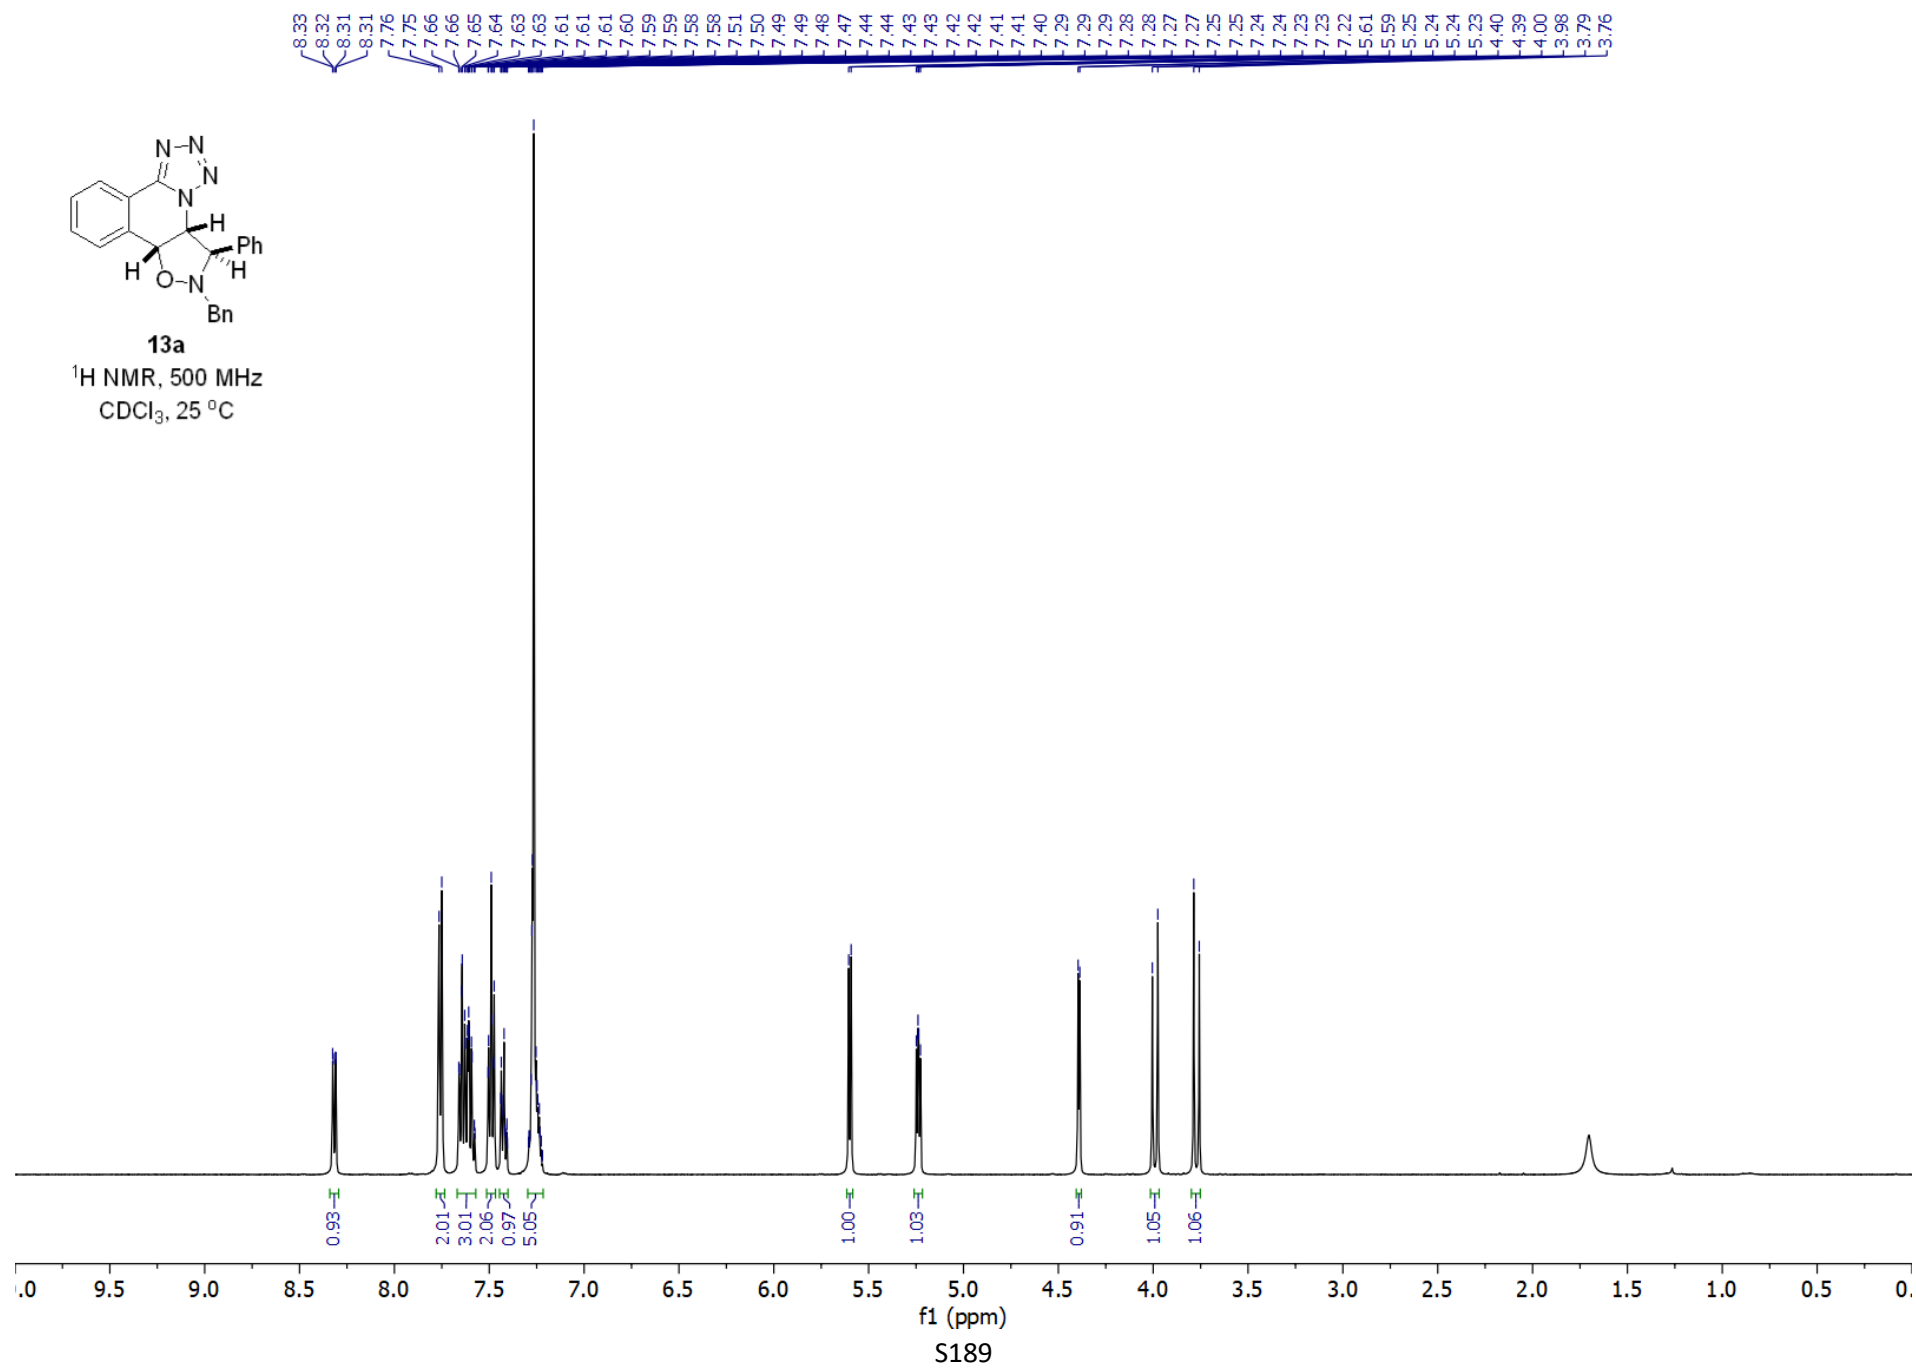

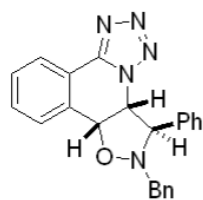

**13a**

$^{13}\text{C}$  NMR, 125 MHz

$\text{CDCl}_3$ , 25  $^\circ\text{C}$

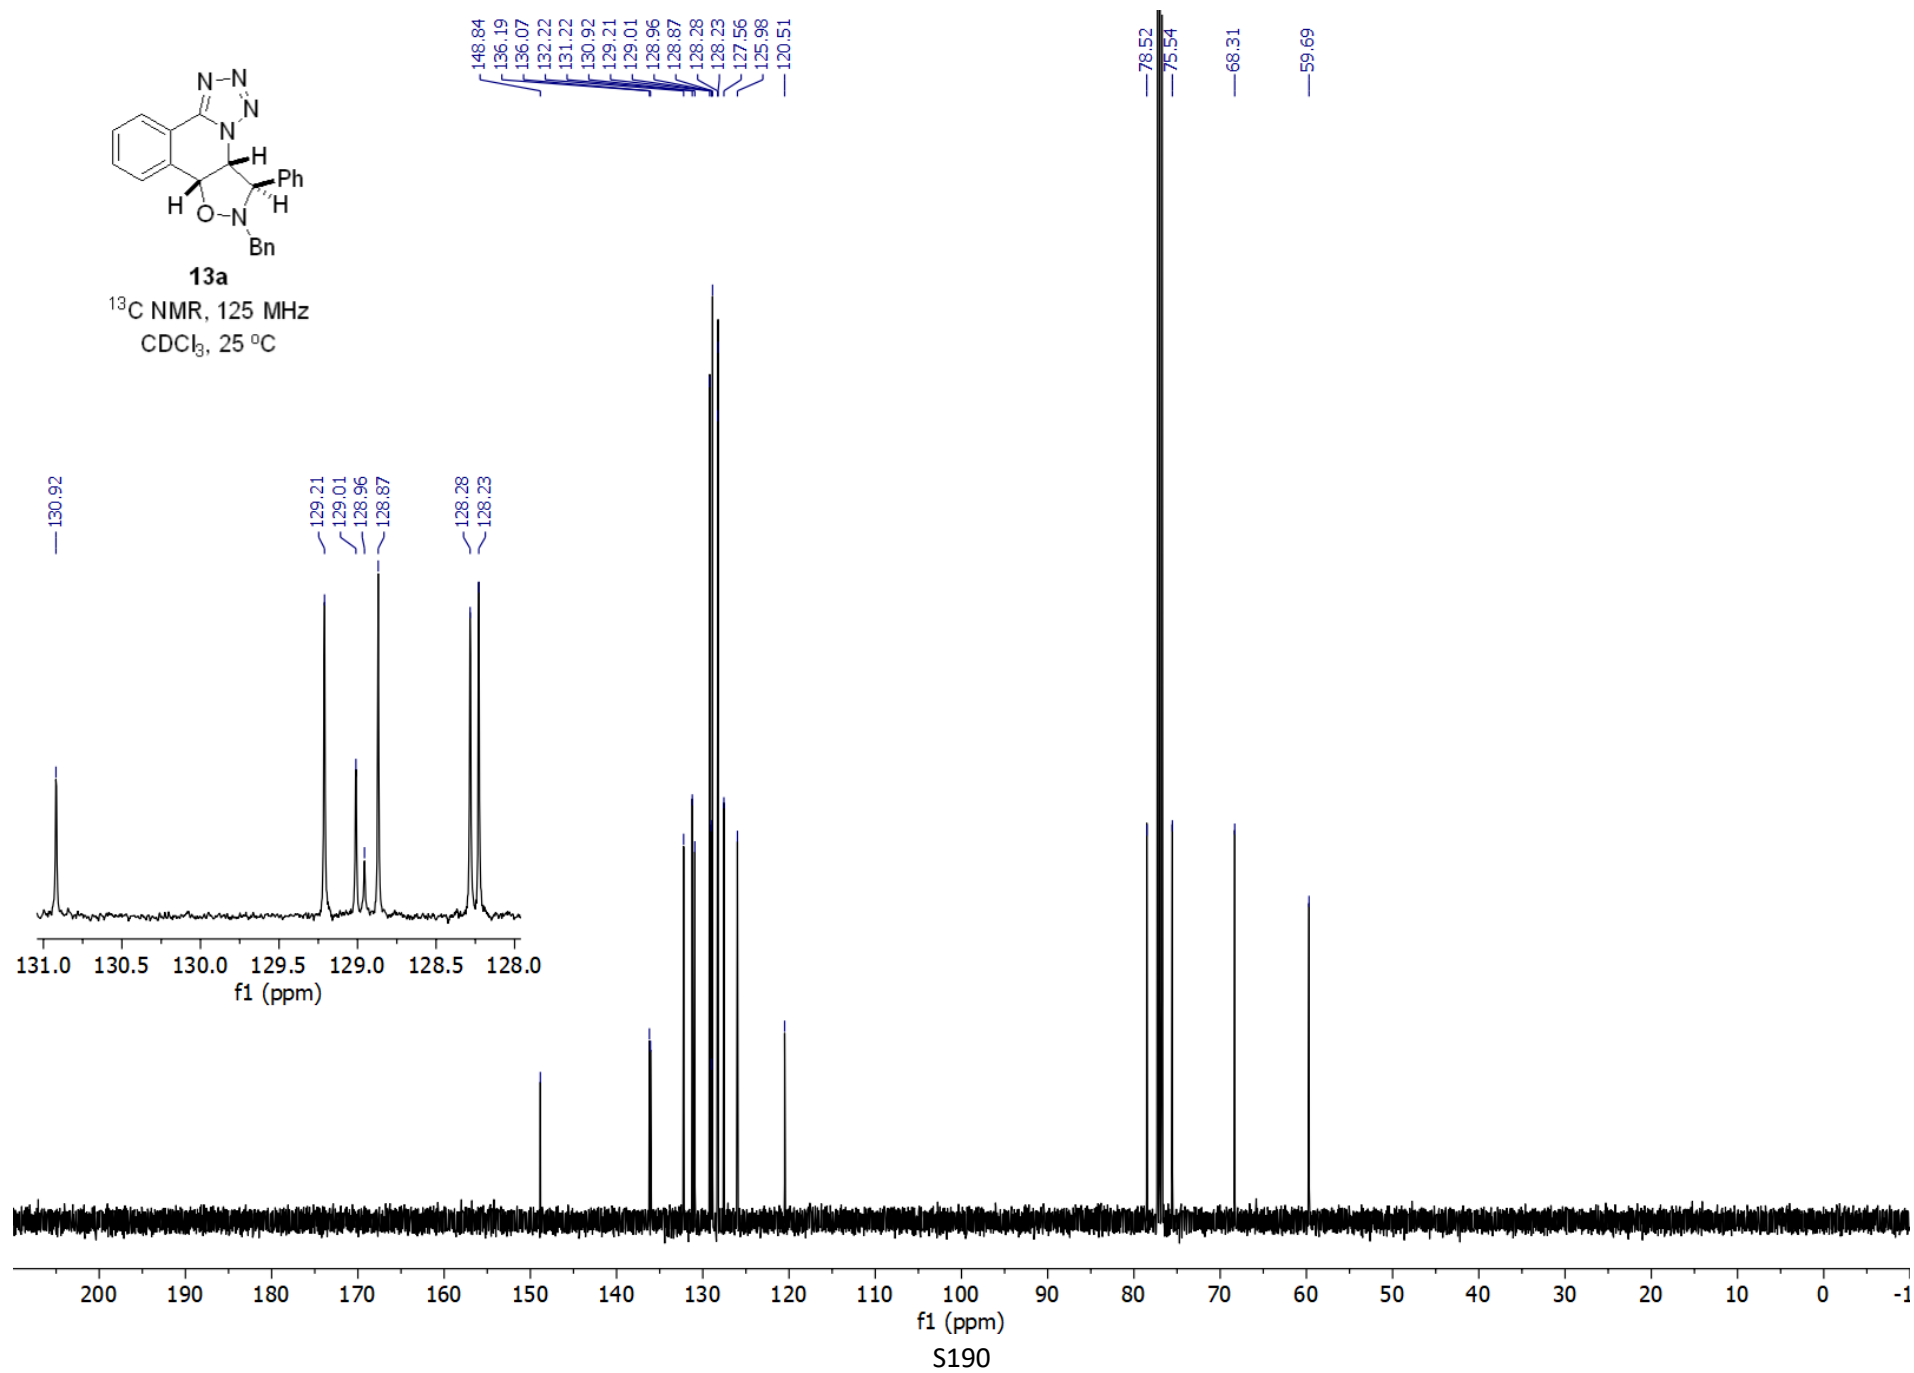

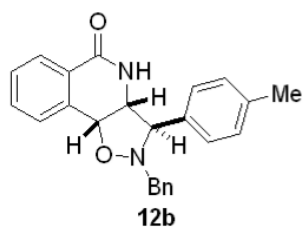

$^1\text{H}$  NMR, 500 MHz  
DMSO- $d_6$ , 60  $^\circ\text{C}$

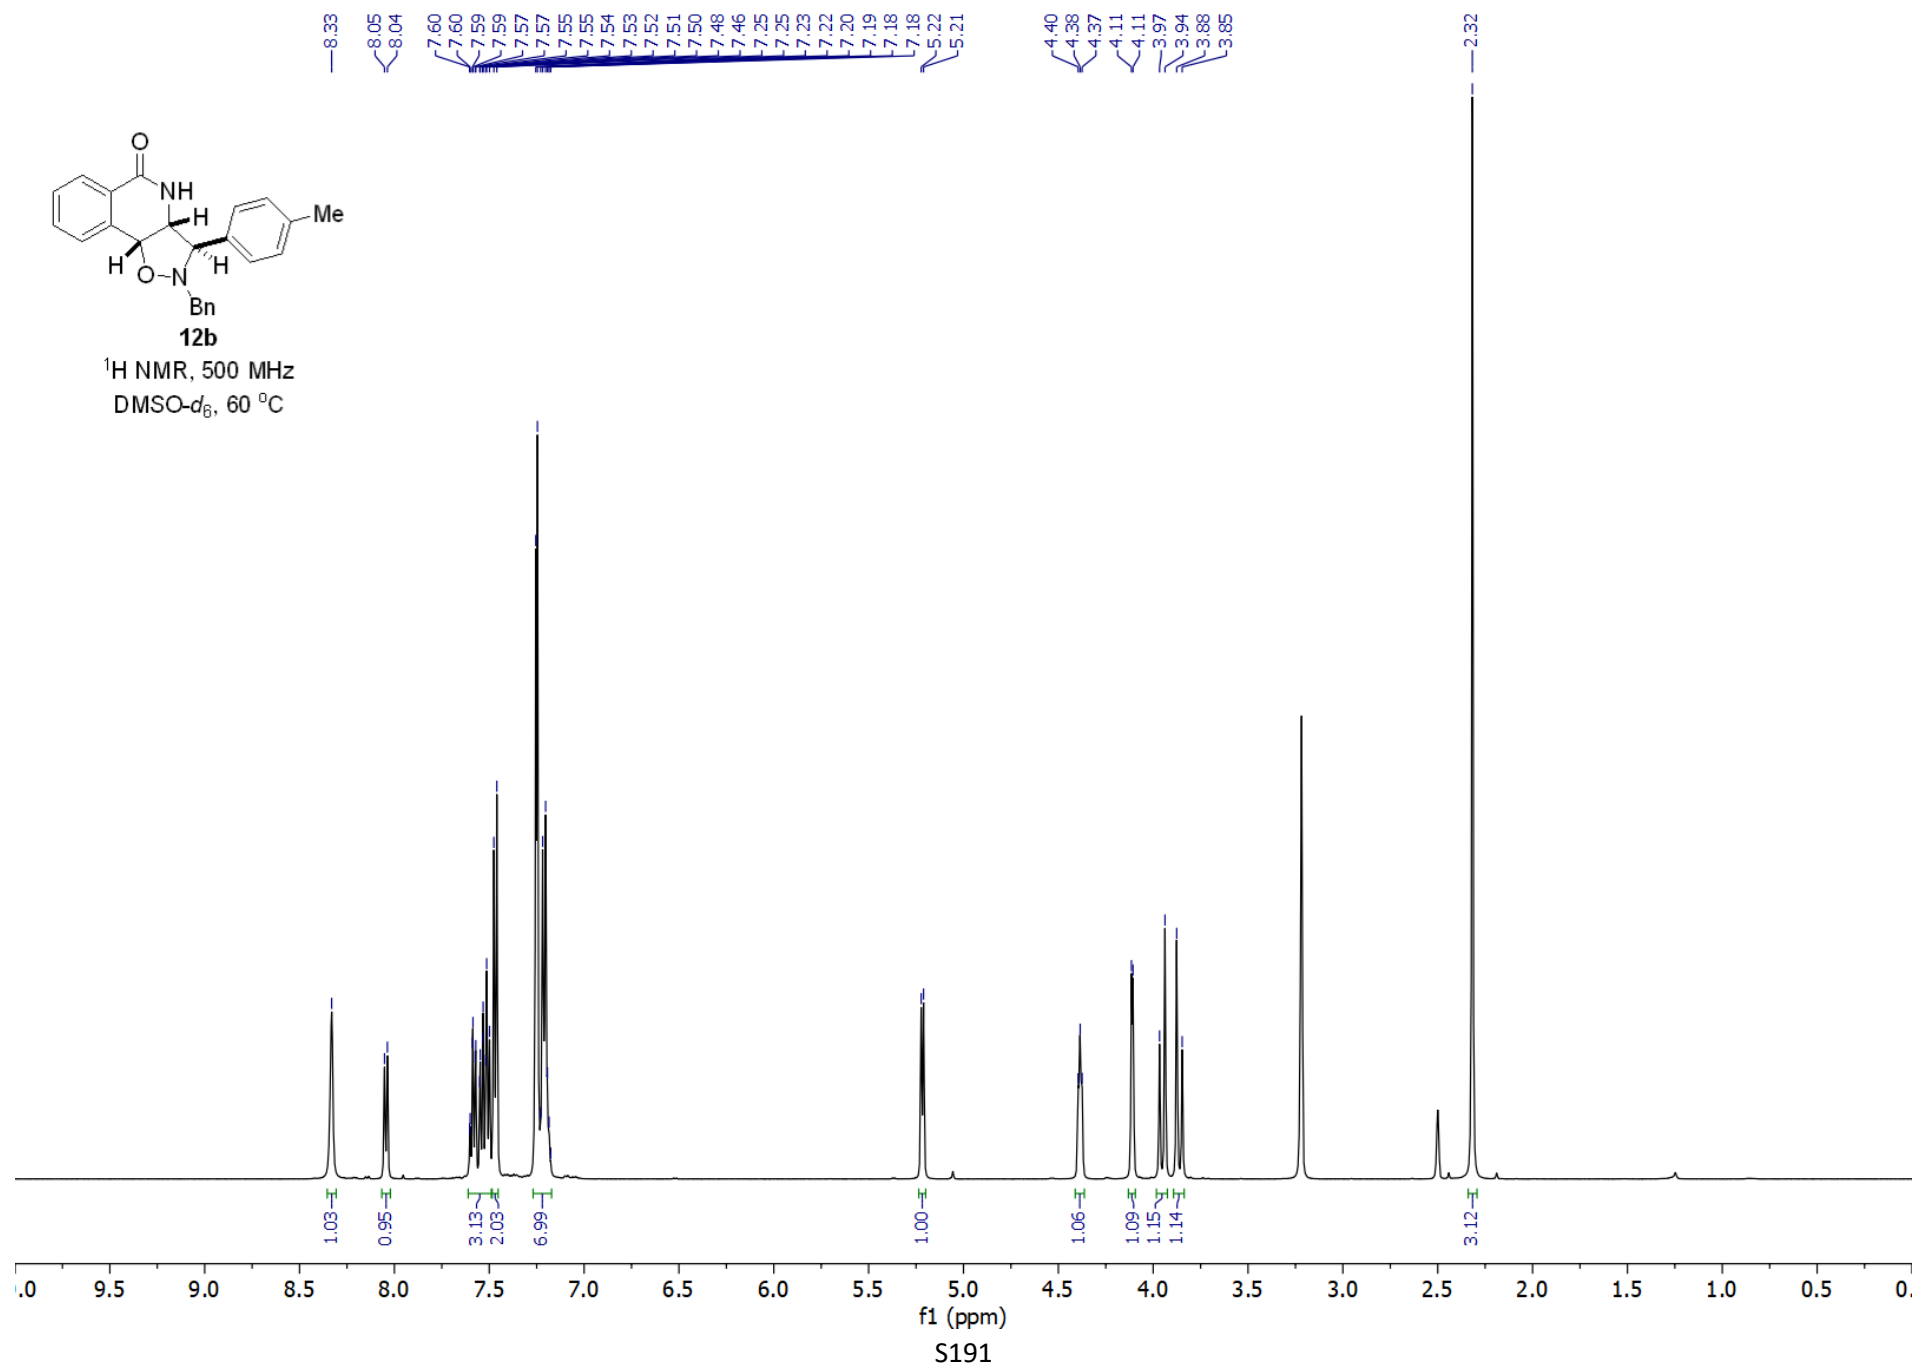

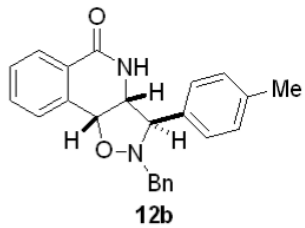

$^{13}\text{C}$  NMR, 125 MHz  
DMSO- $d_6$ , 60  $^\circ\text{C}$

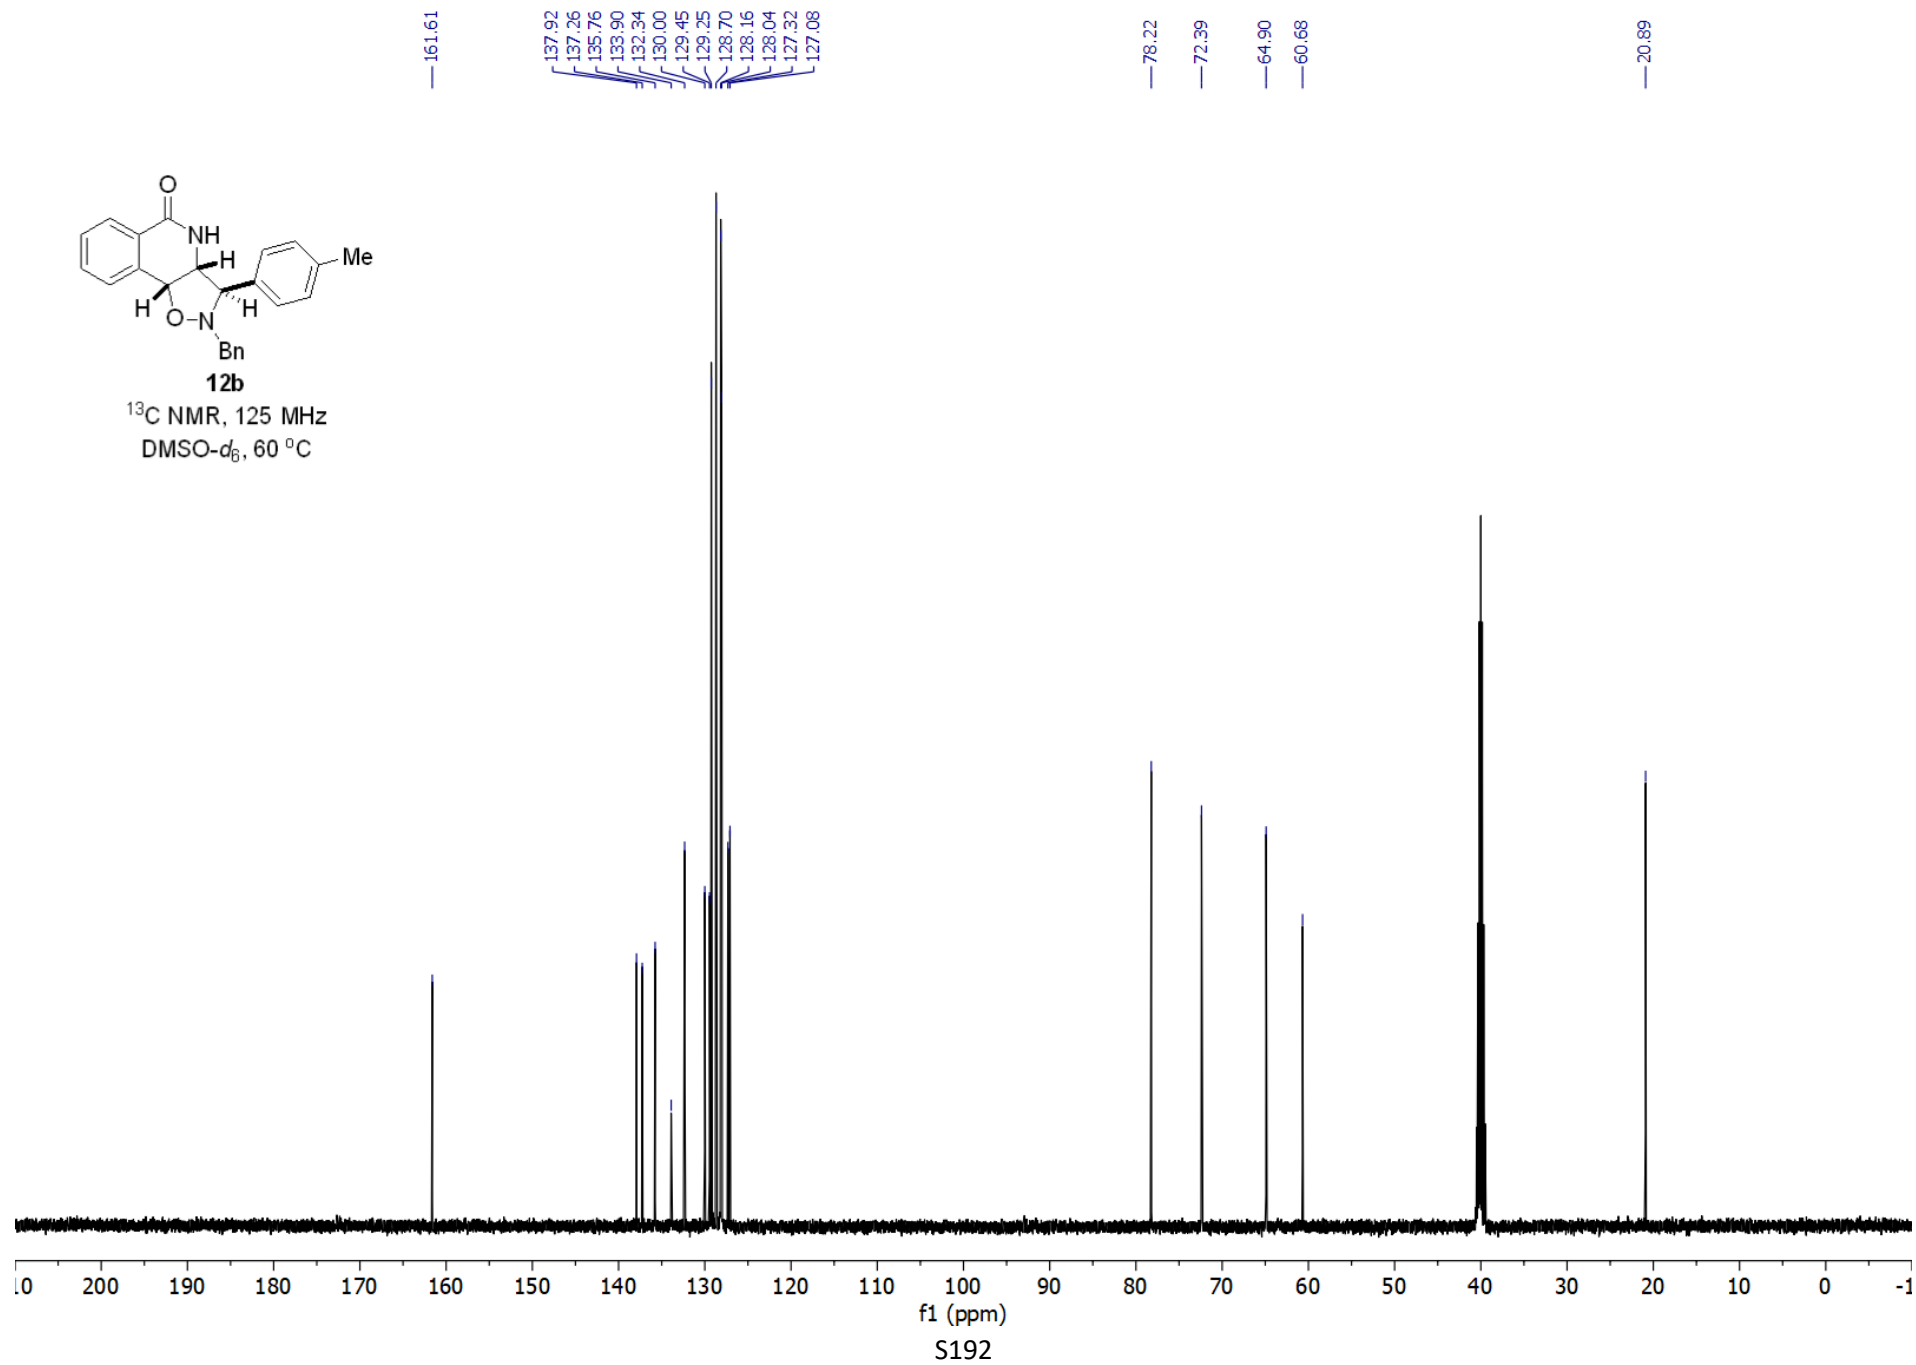

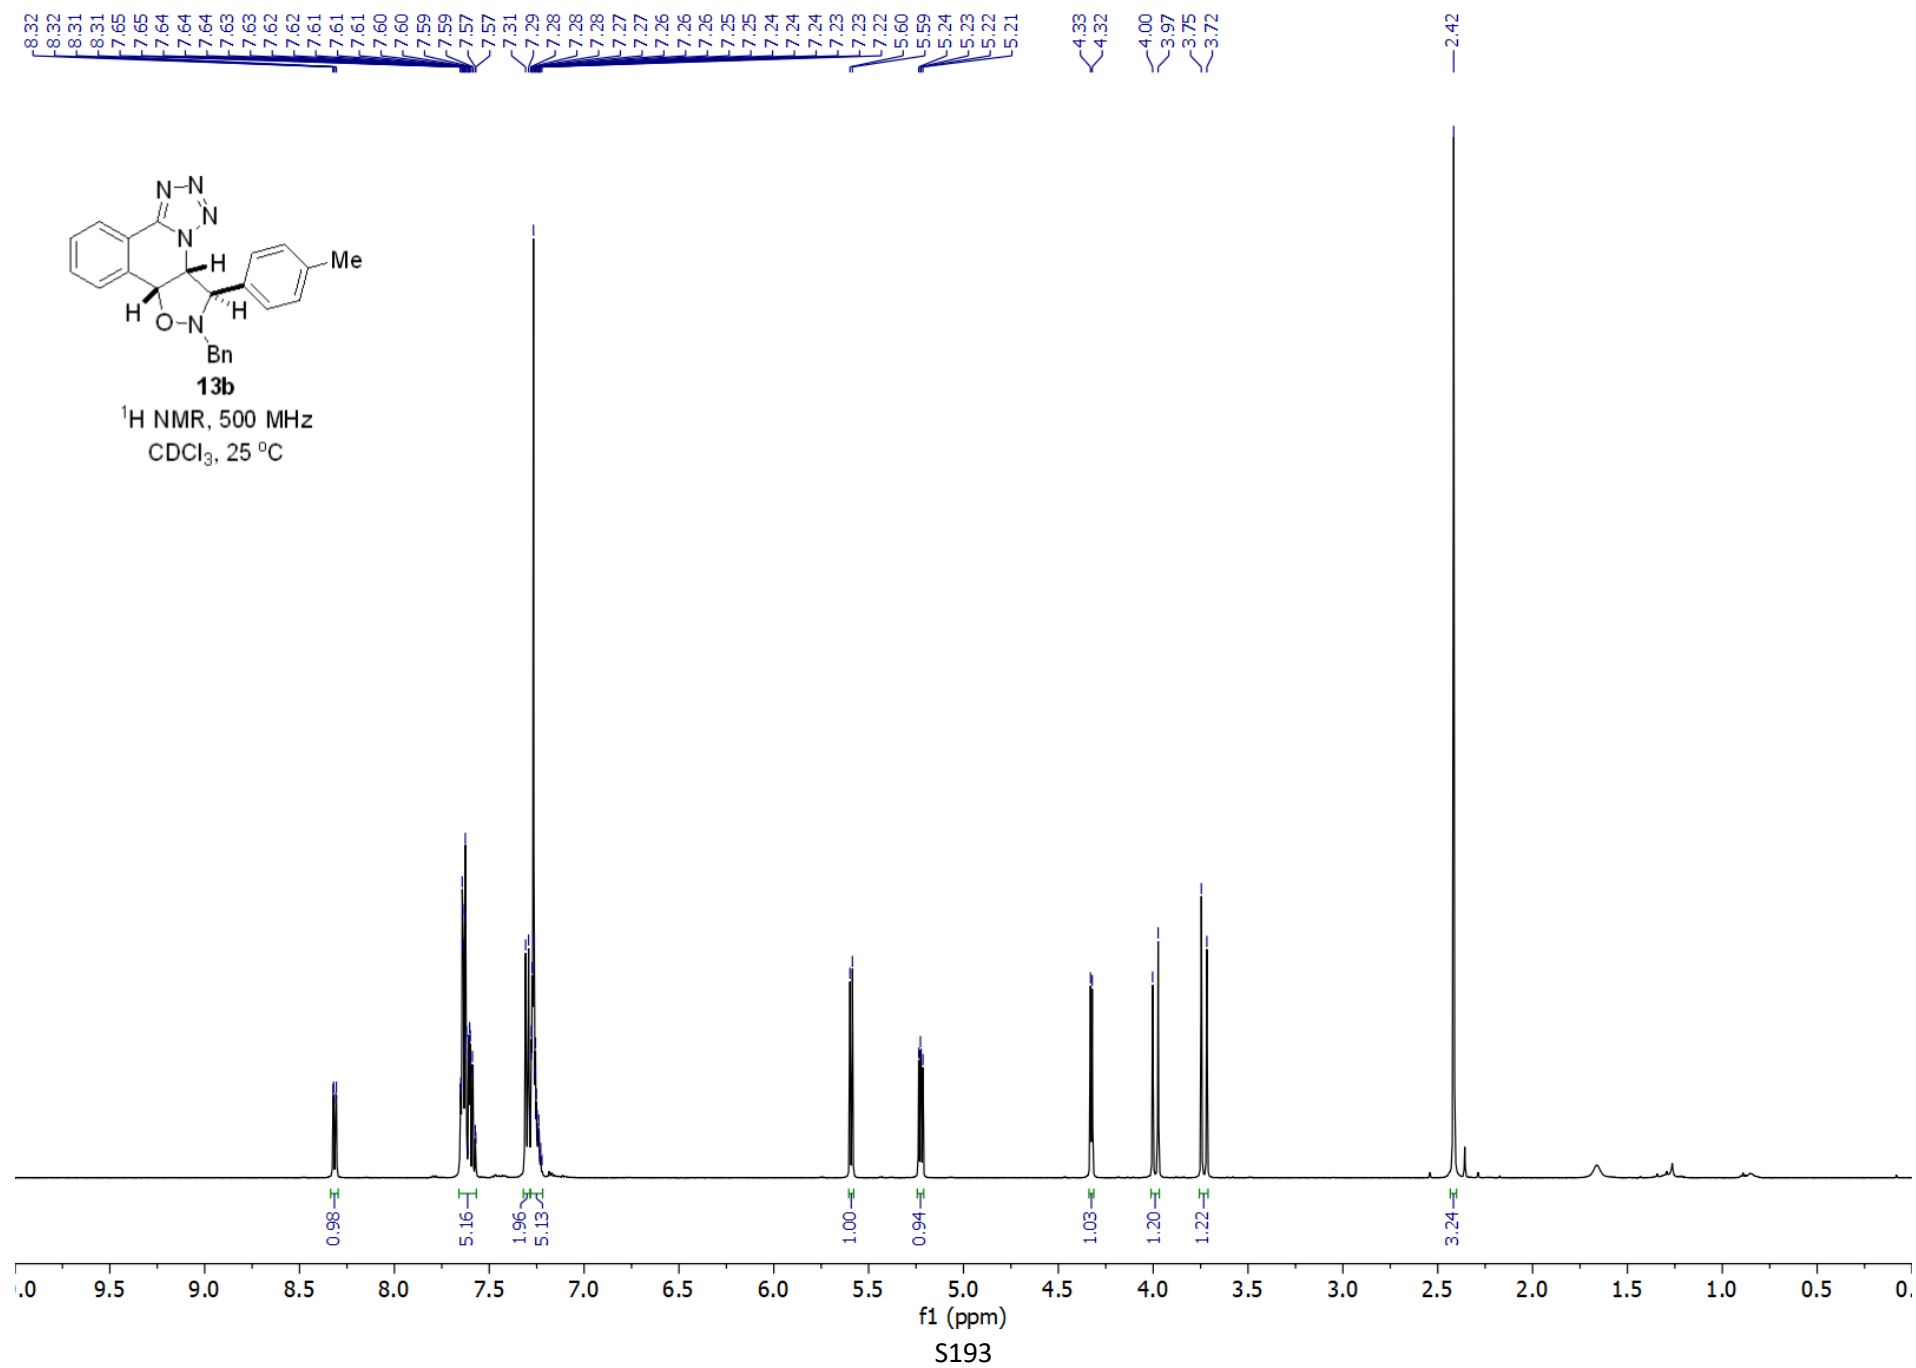

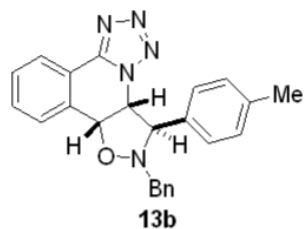

$^{13}\text{C}$  NMR, 125 MHz  
 $\text{CDCl}_3$ , 25  $^\circ\text{C}$

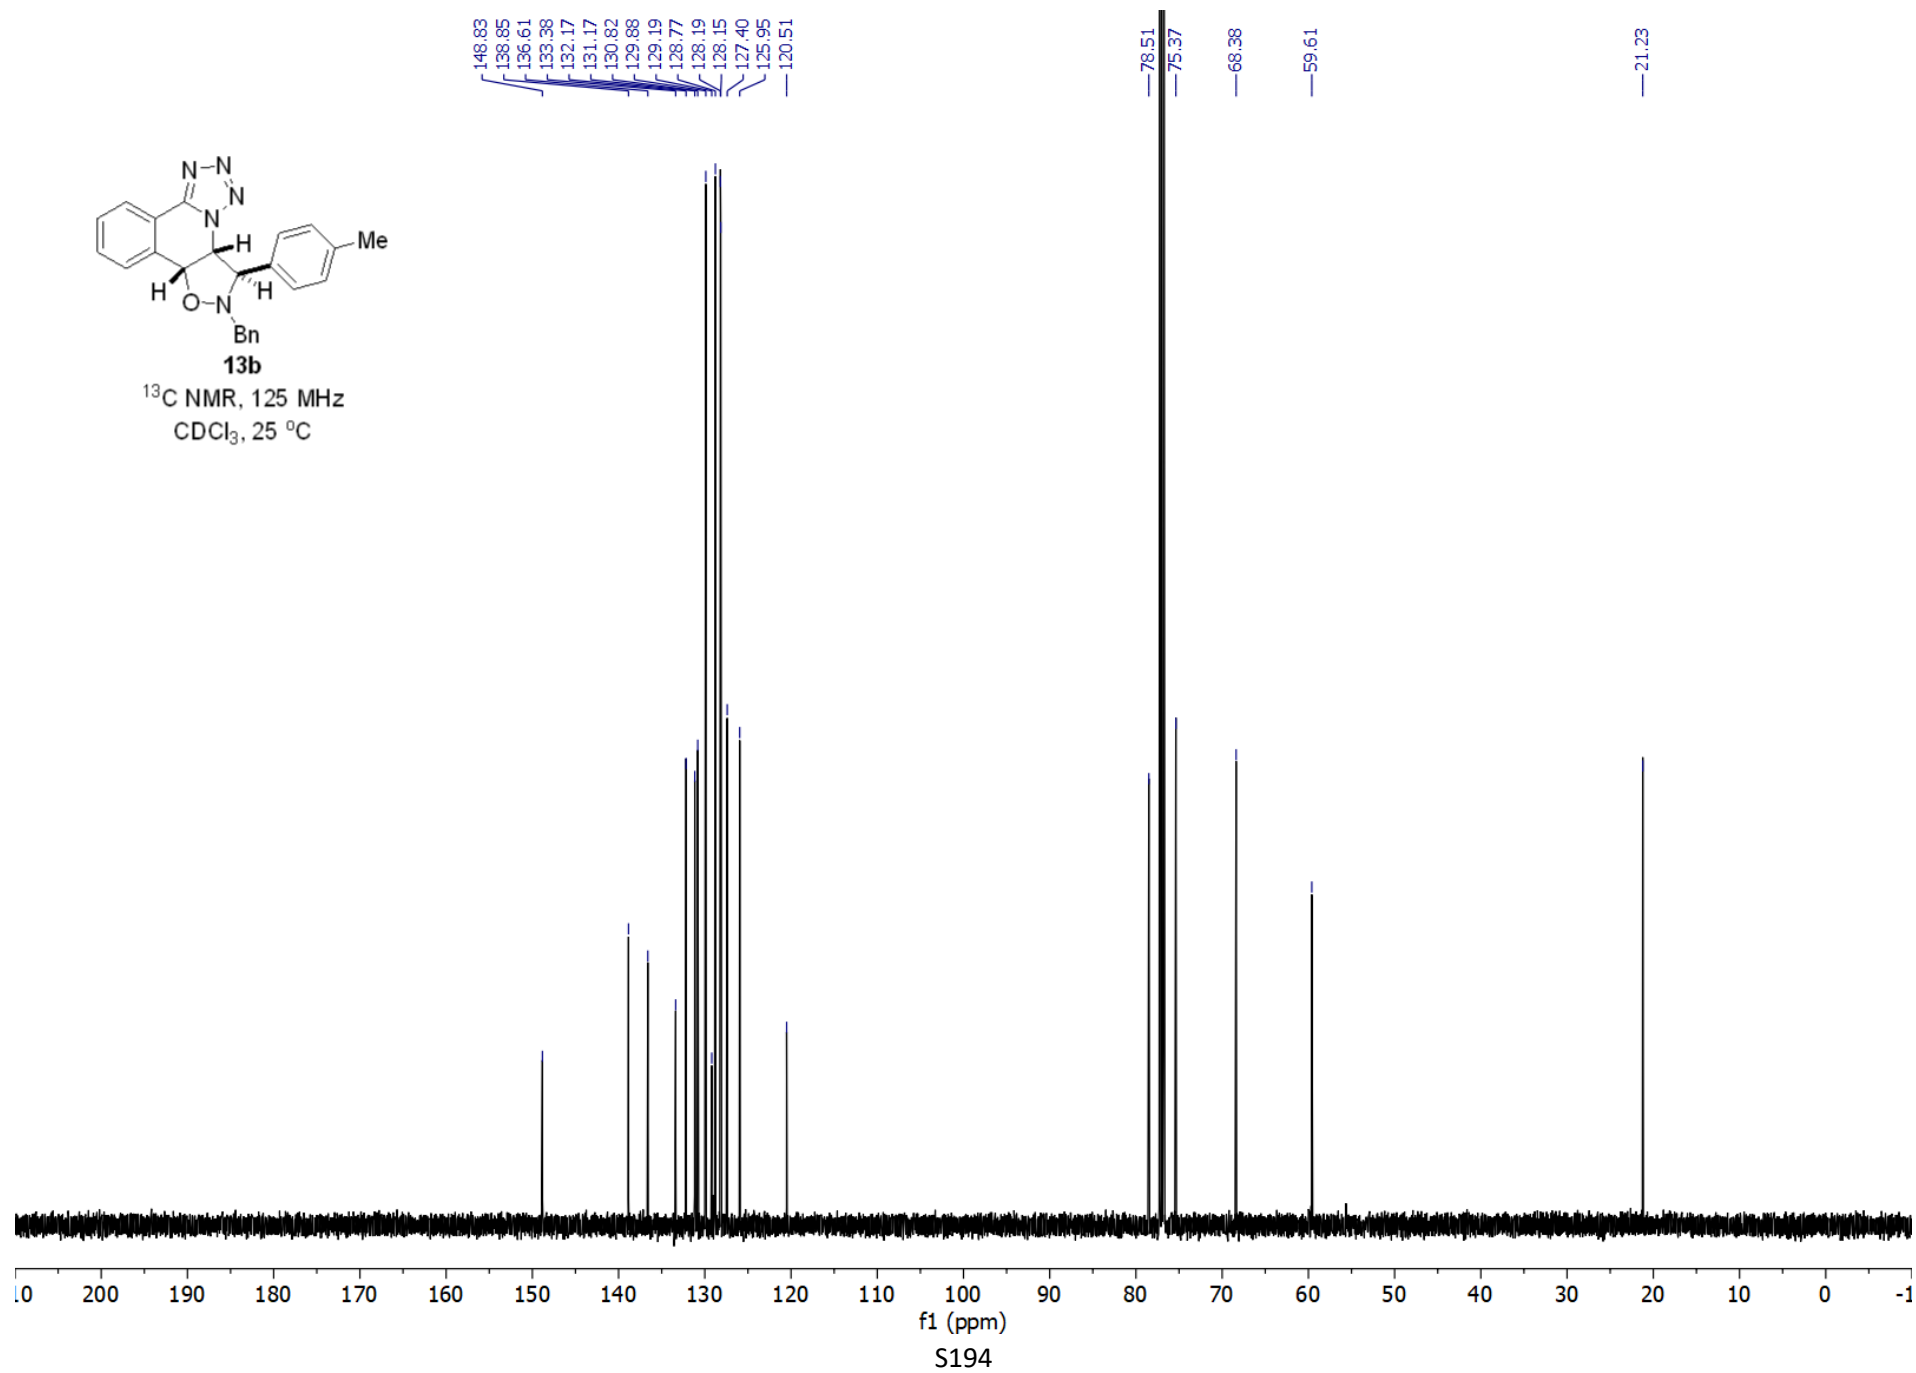

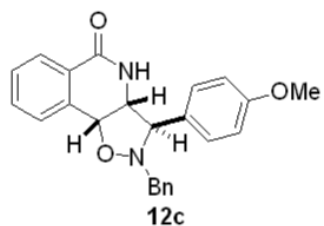

$^1\text{H}$  NMR, 500 MHz  
DMSO- $d_6$ , 60  $^\circ\text{C}$

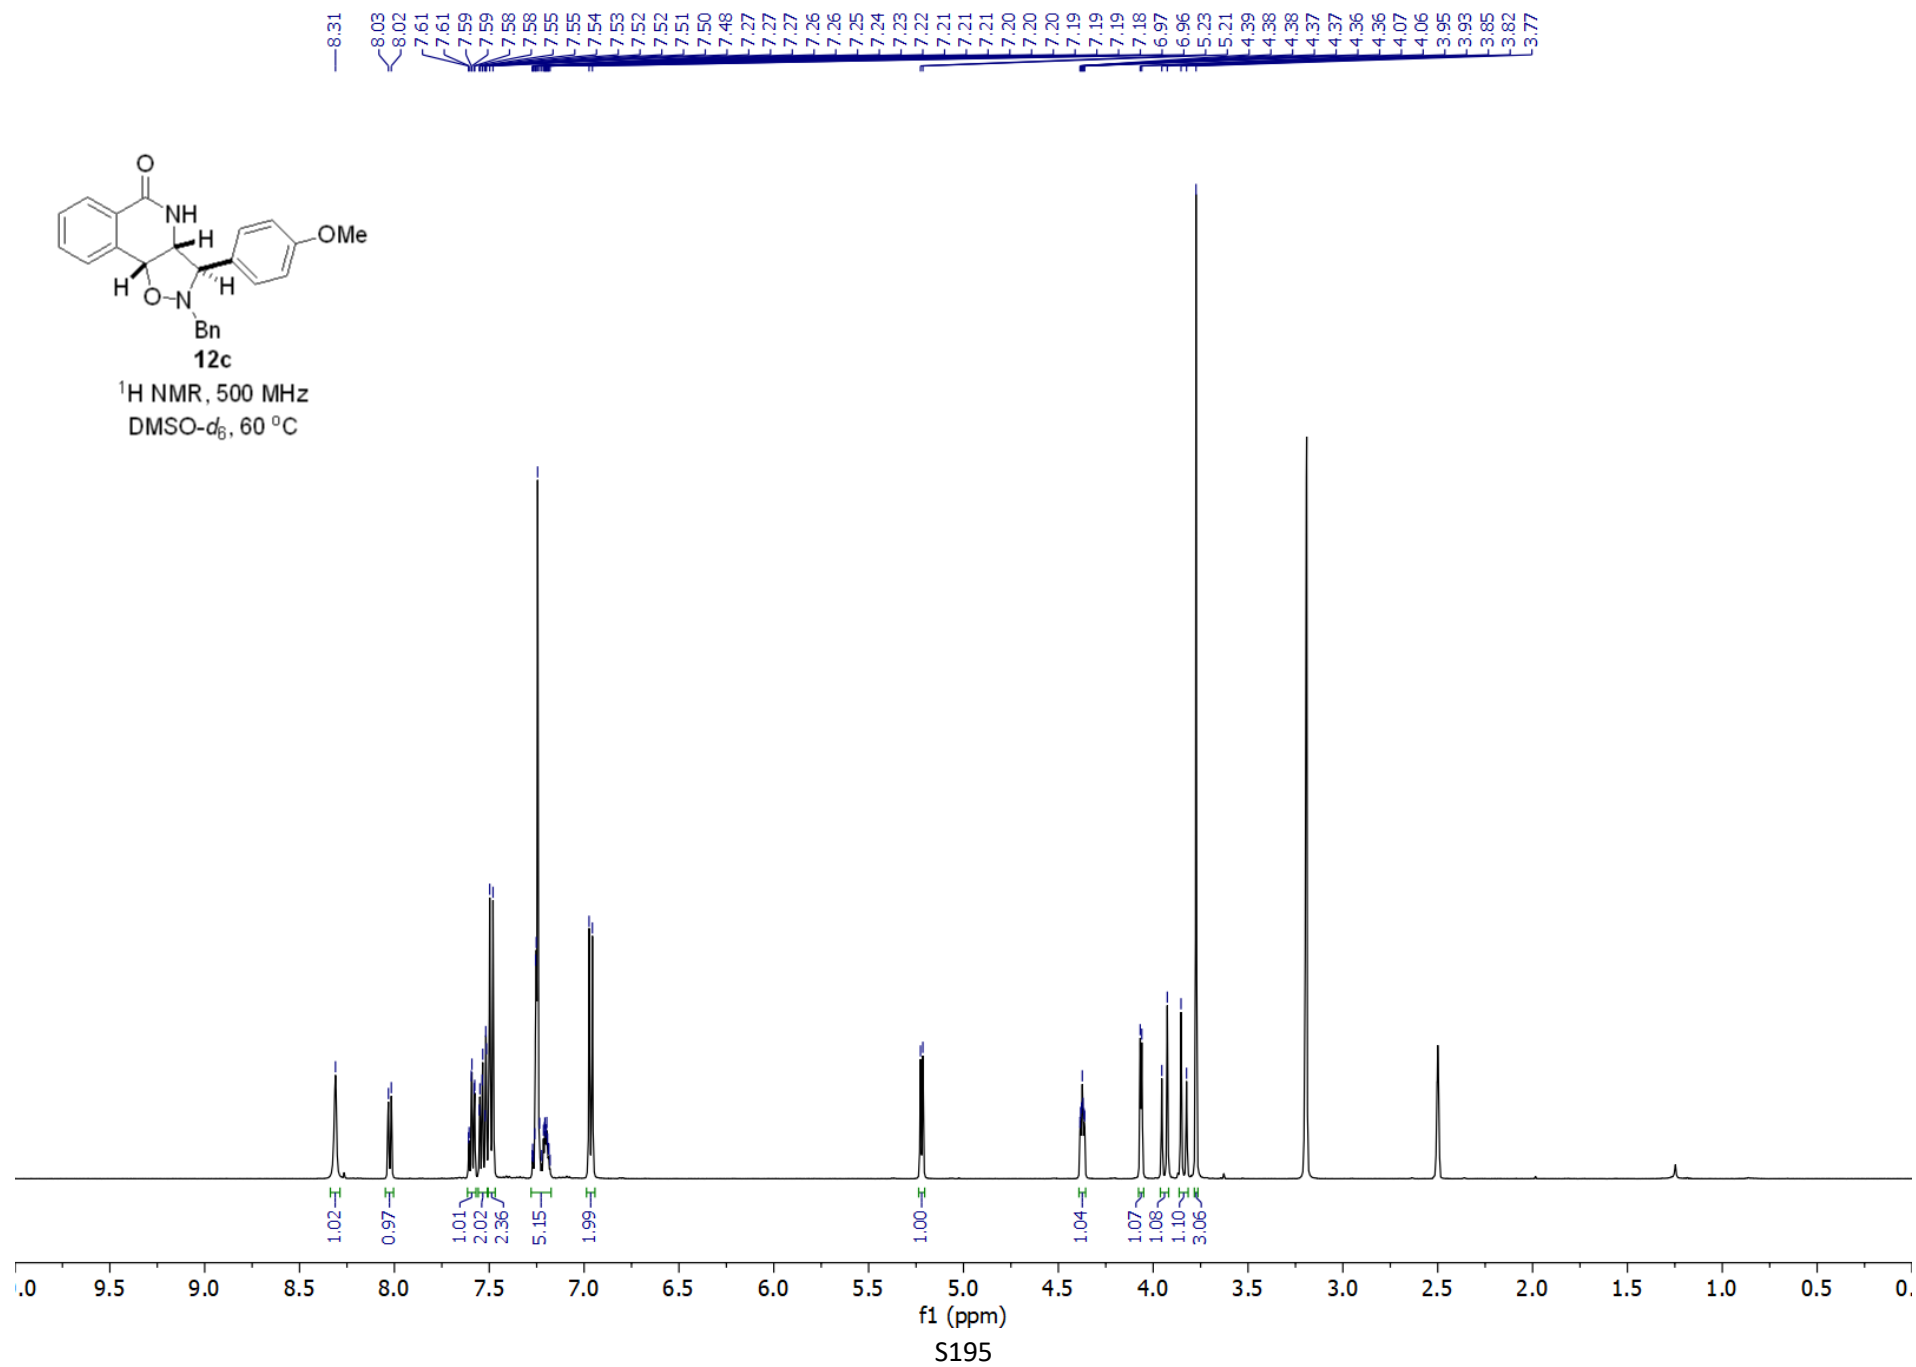

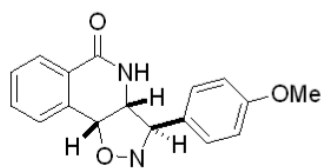

**12c**

<sup>13</sup>C NMR, 125 MHz  
DMSO-*d*<sub>6</sub>, 60 °C

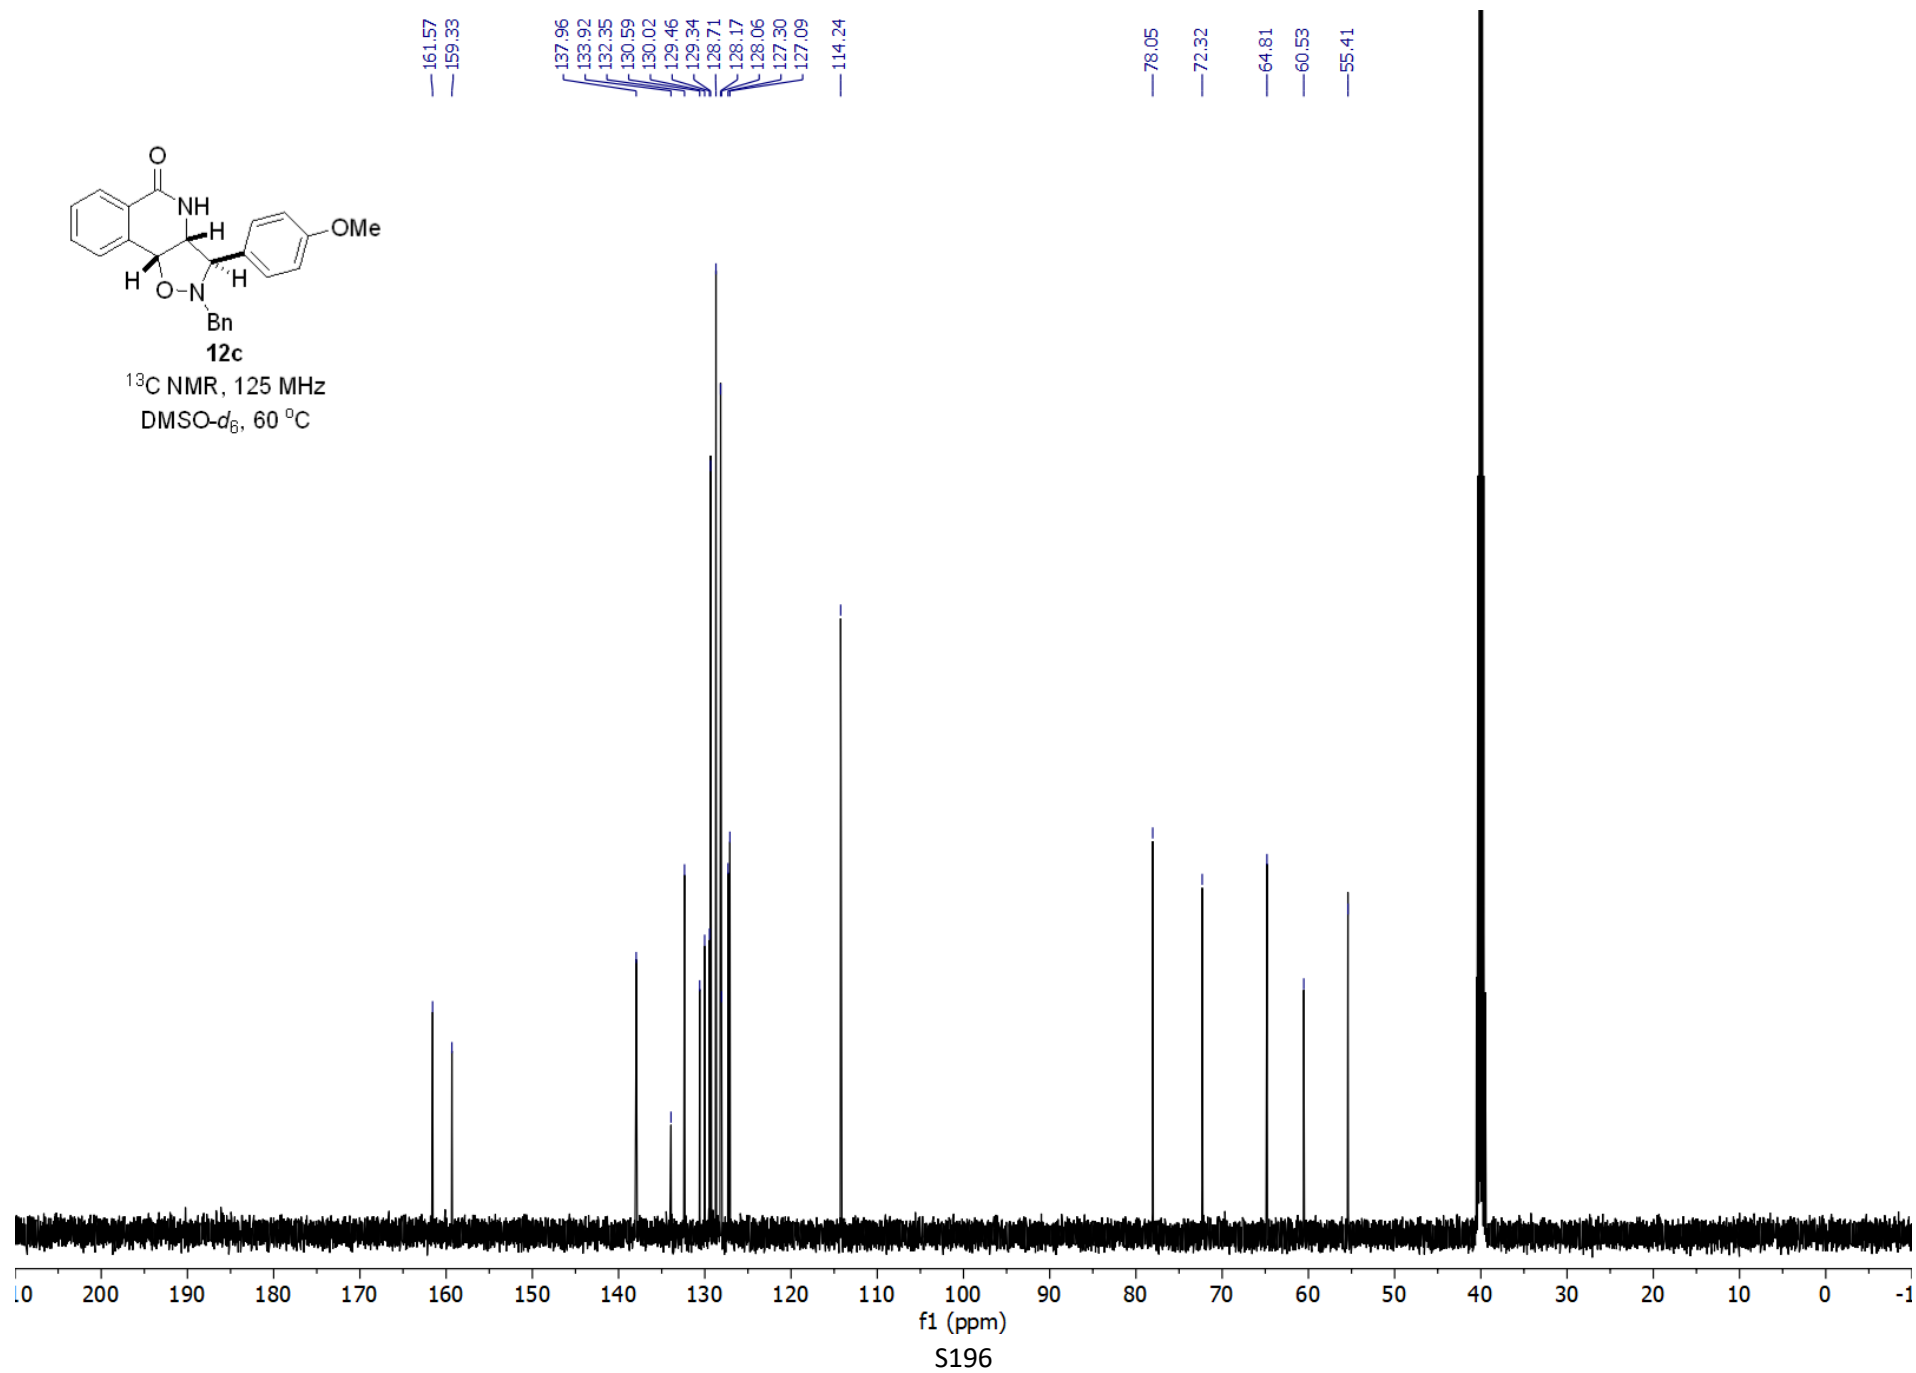

8.32  
8.32  
8.31  
8.30  
7.67  
7.67  
7.66  
7.65  
7.65  
7.64  
7.64  
7.62  
7.62  
7.61  
7.60  
7.59  
7.58  
7.57  
7.30  
7.29  
7.29  
7.28  
7.28  
7.28  
7.28  
7.27  
7.27  
7.26  
7.26  
7.25  
7.25  
7.24  
7.24  
7.23  
7.23  
7.22  
7.22  
7.01  
5.61  
5.60  
5.23  
5.22  
5.21  
5.20  
4.30  
4.29  
4.00  
3.97  
3.86  
3.75  
3.72

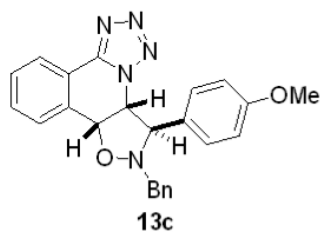

$^1\text{H}$  NMR, 500 MHz  
 $\text{CDCl}_3$ , 25  $^\circ\text{C}$

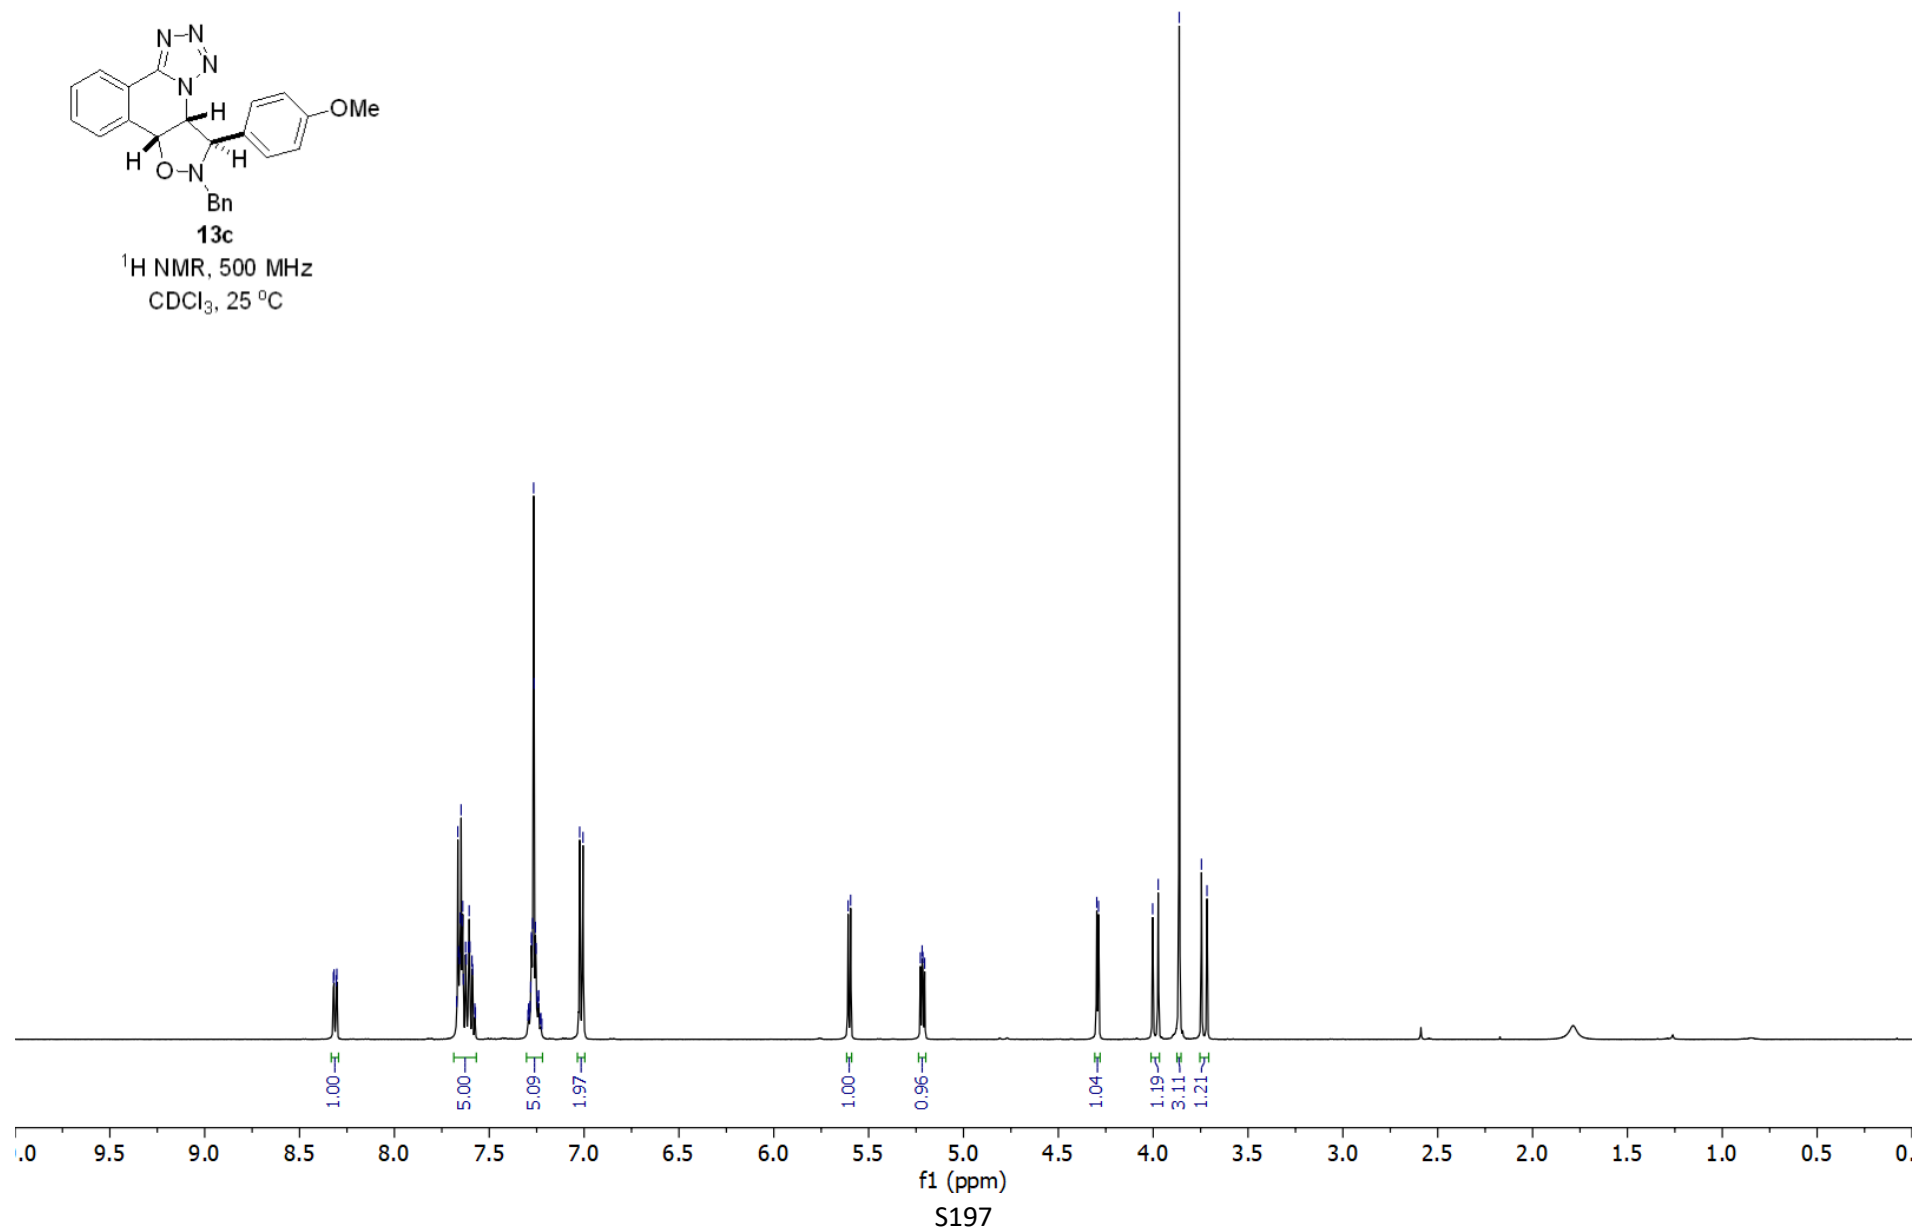

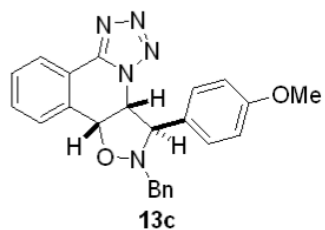

$^{13}\text{C}$  NMR, 125 MHz  
 $\text{CDCl}_3$ , 25  $^\circ\text{C}$

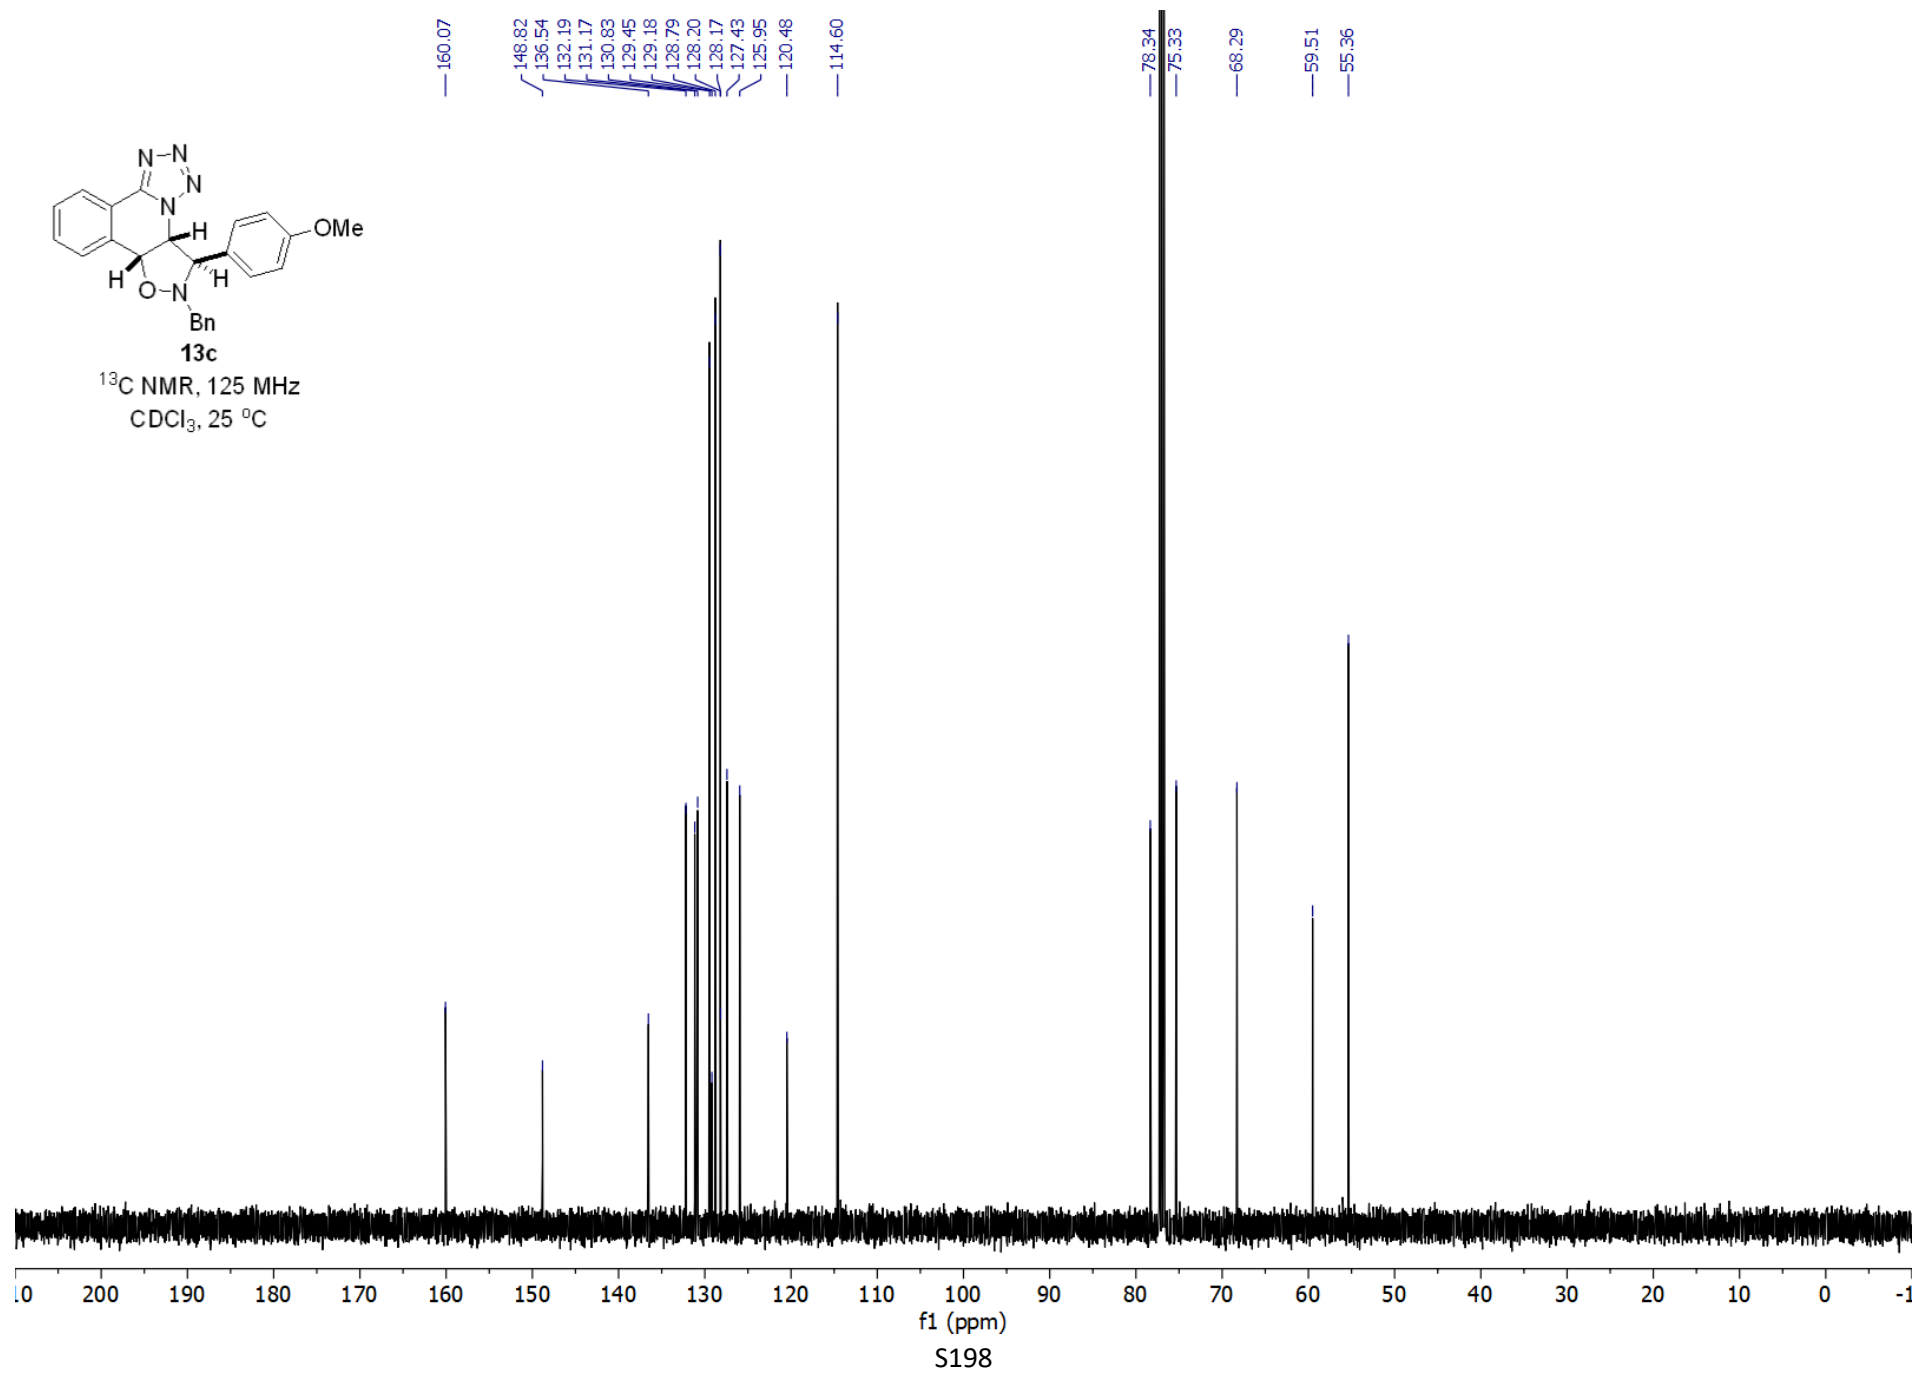

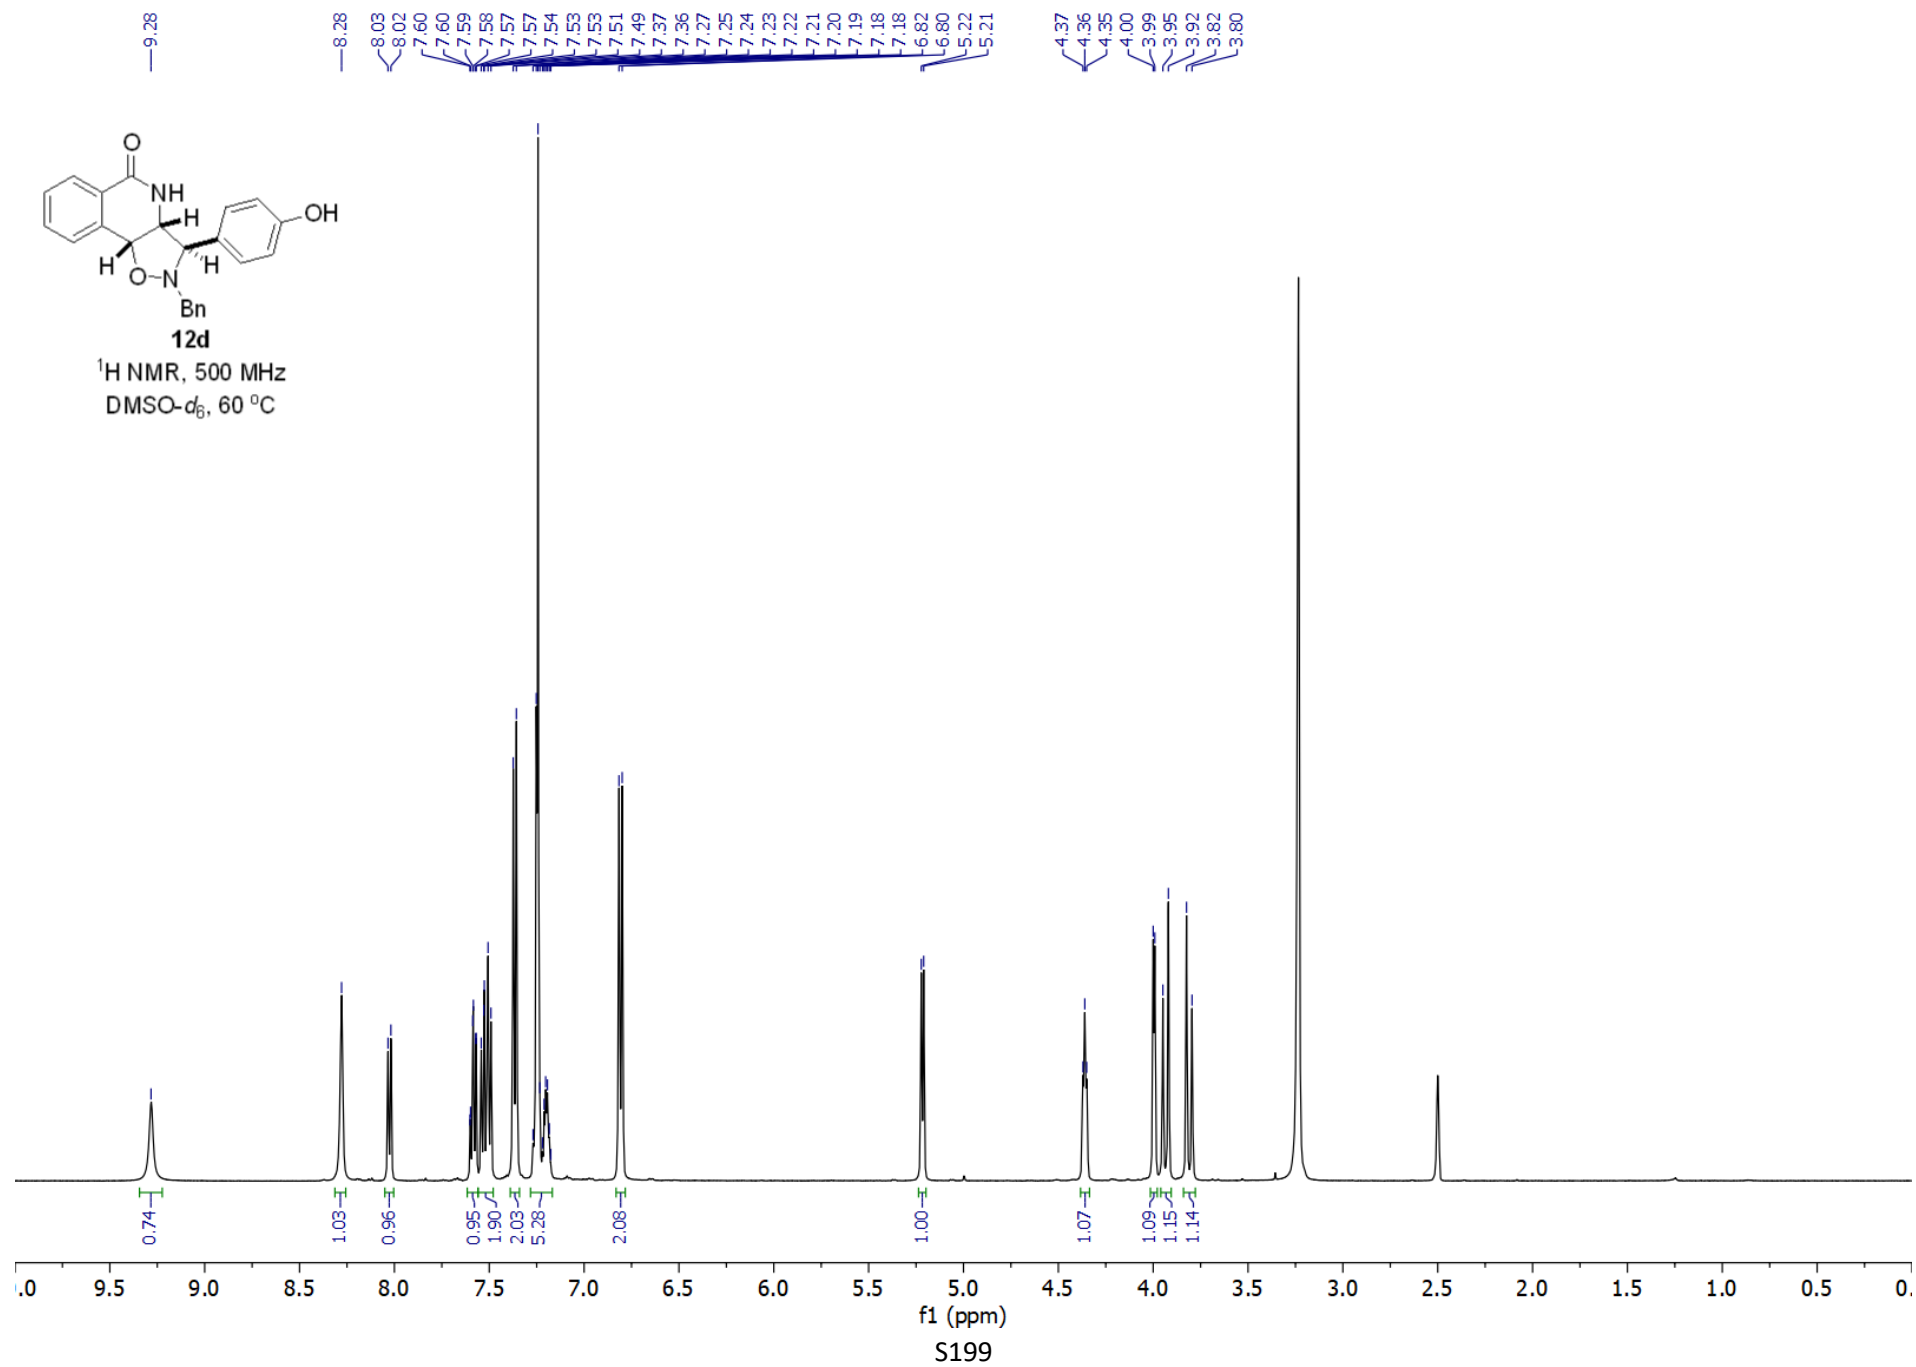

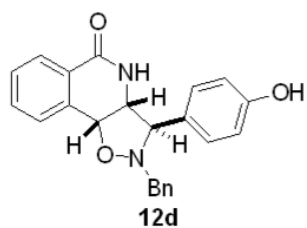

$^{13}\text{C}$  NMR, 125 MHz  
DMSO- $d_6$ , 60  $^{\circ}\text{C}$

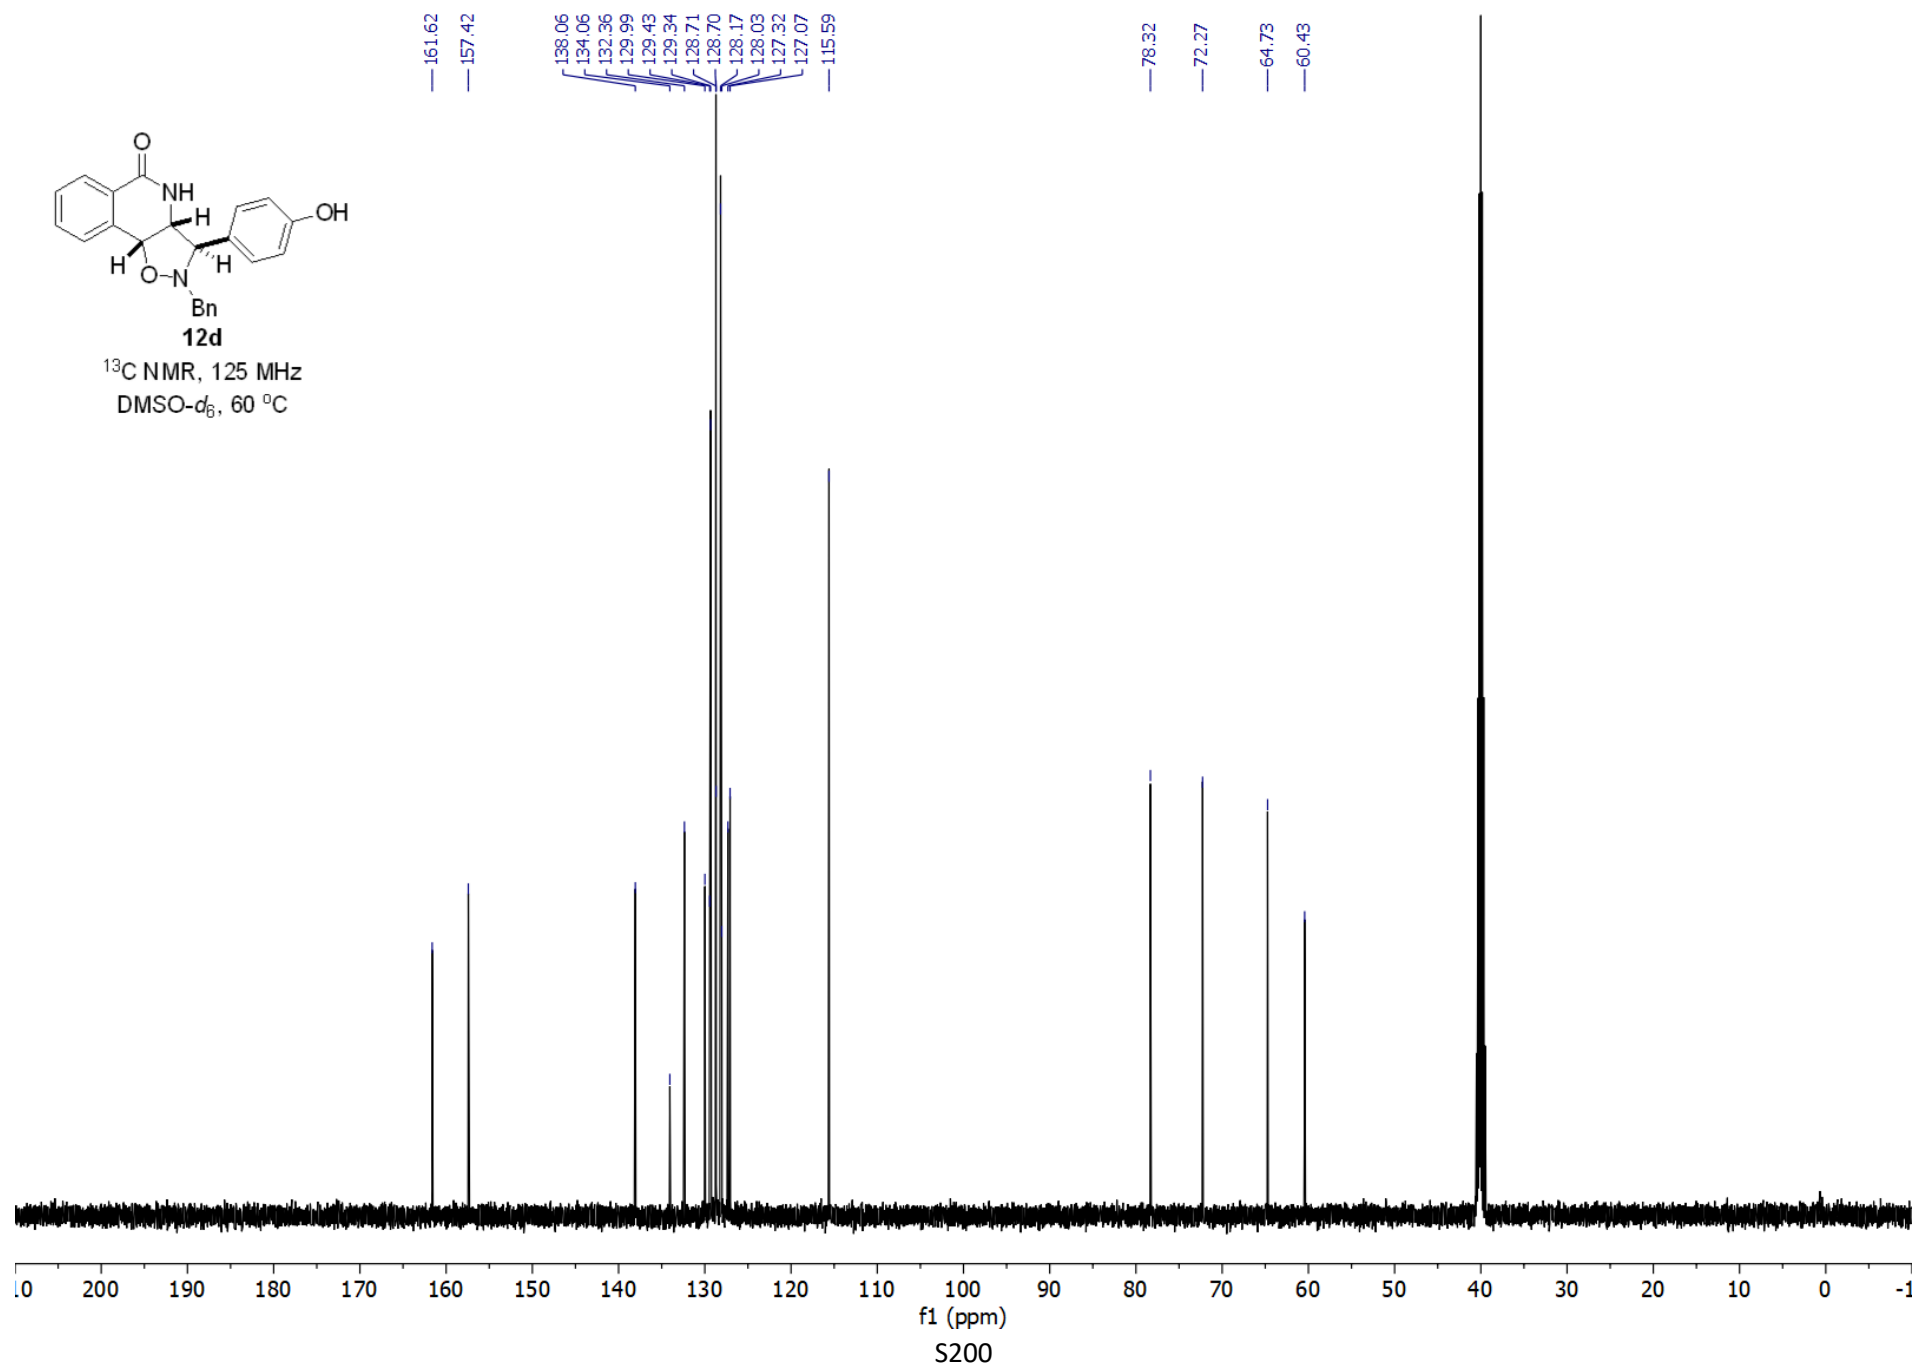

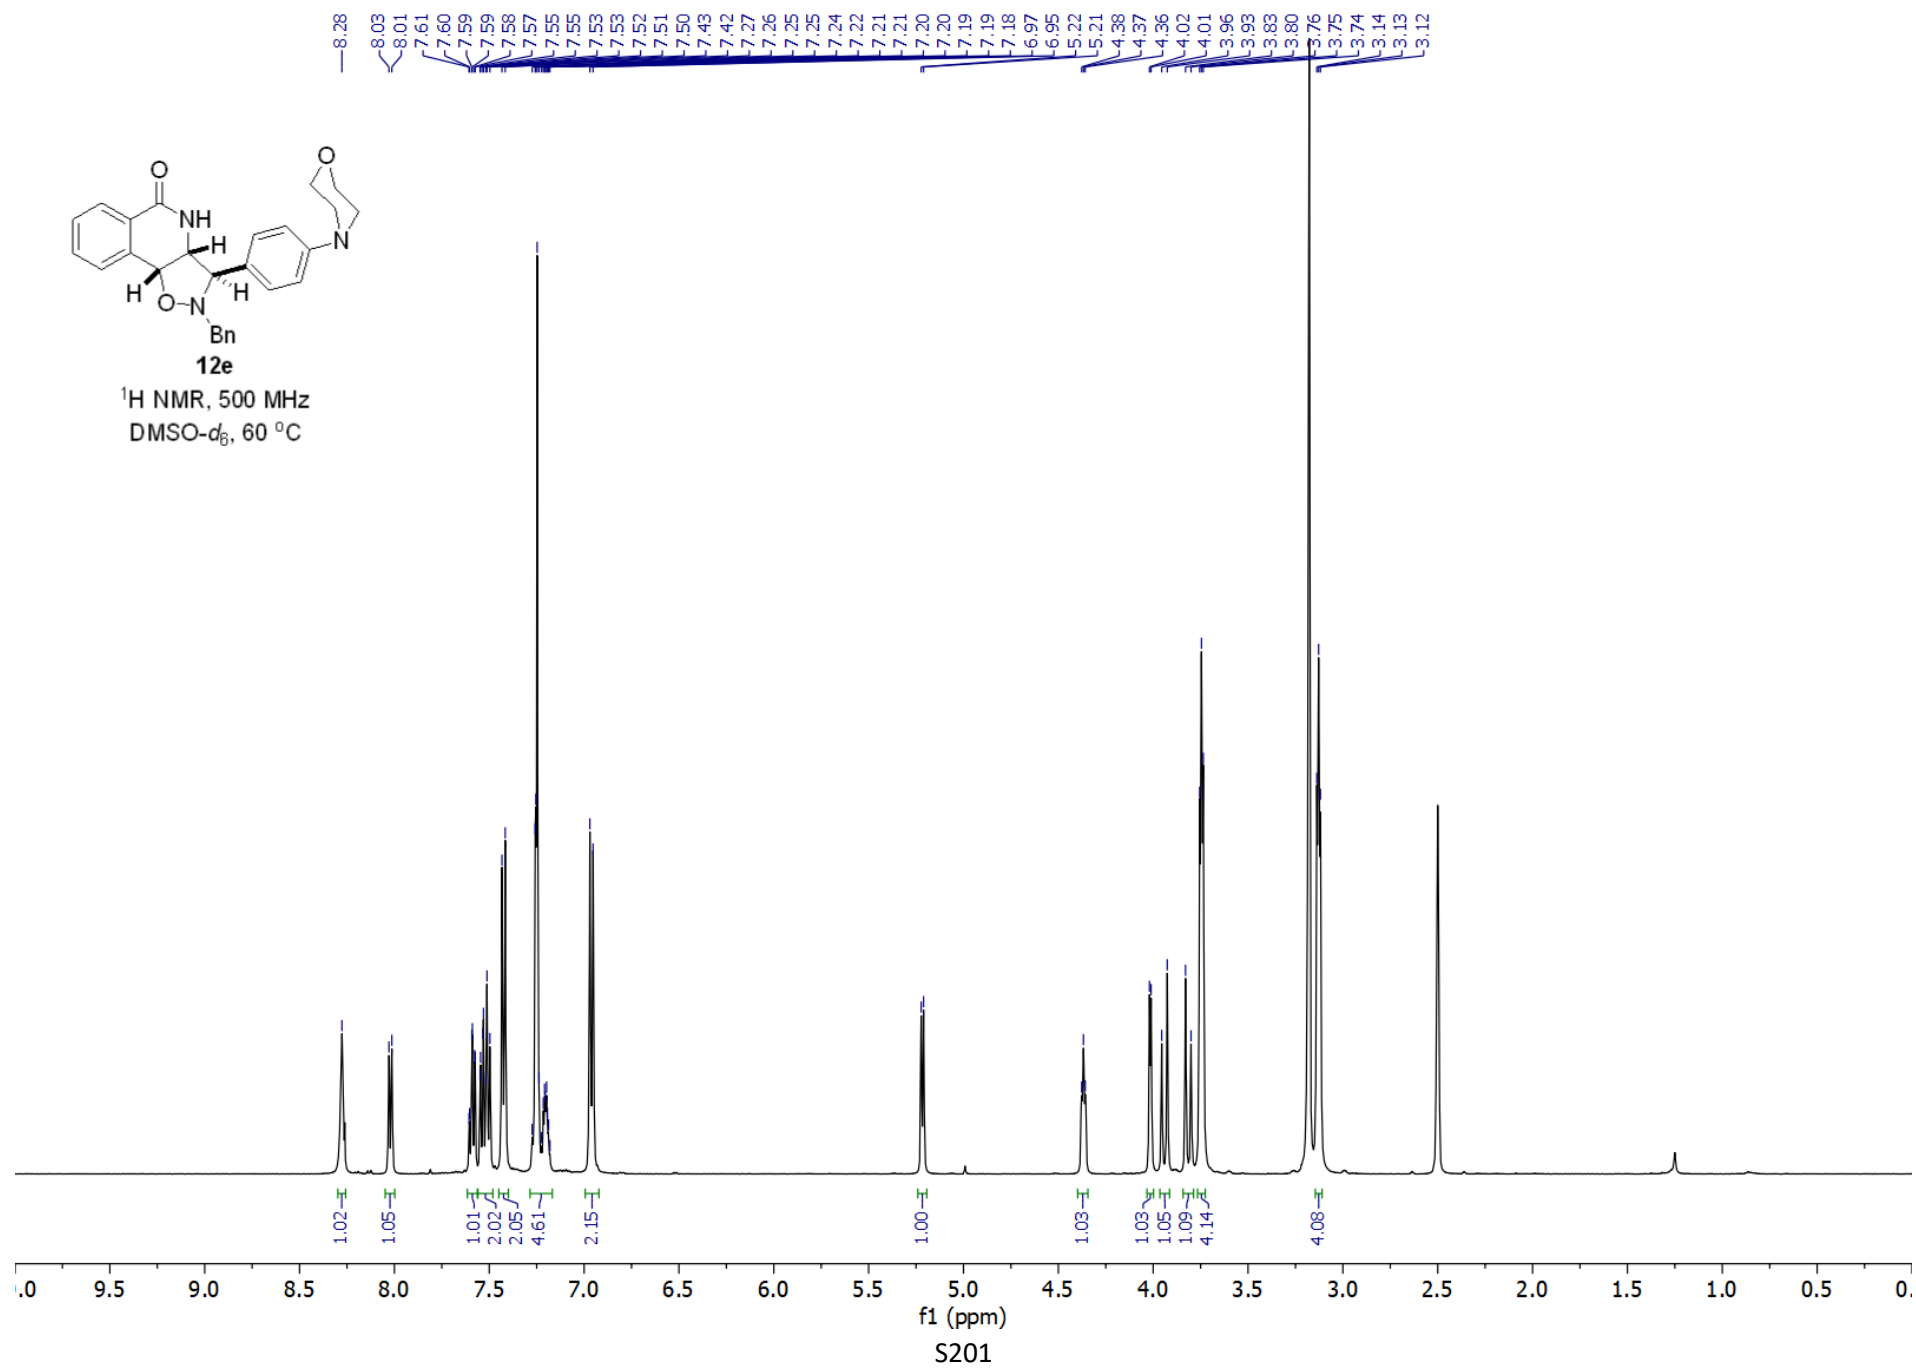

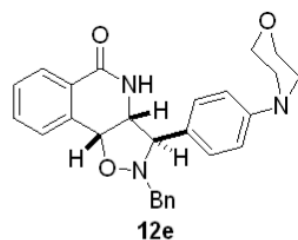

$^{13}\text{C}$  NMR, 125 MHz  
DMSO- $d_6$ , 60 °C

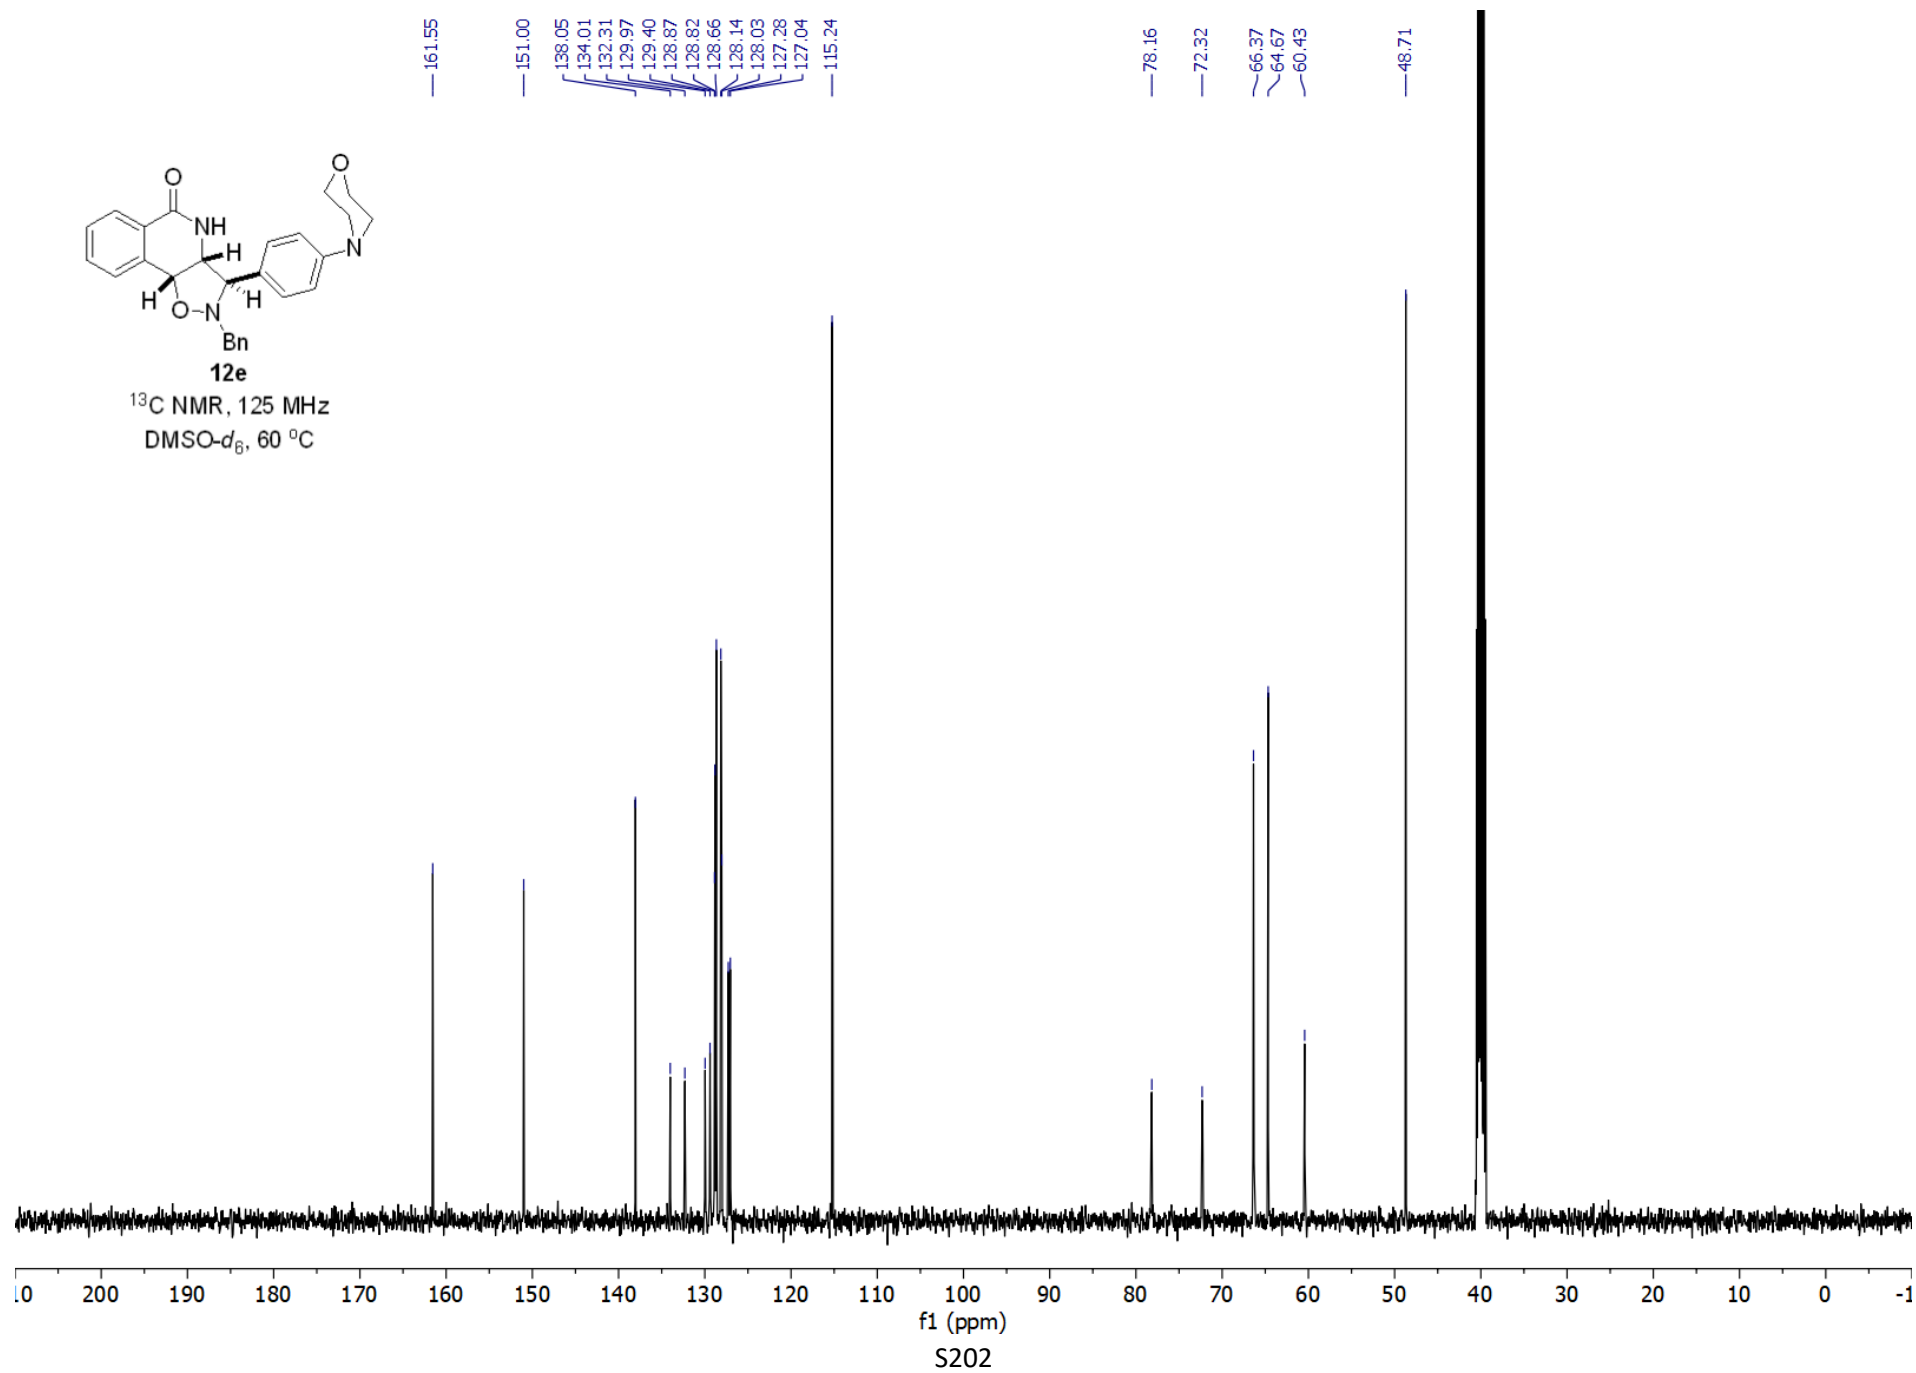

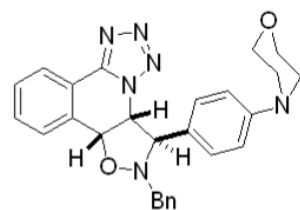

**13e**

$^1\text{H}$  NMR, 500 MHz  
 $\text{CDCl}_3$ , 25 °C

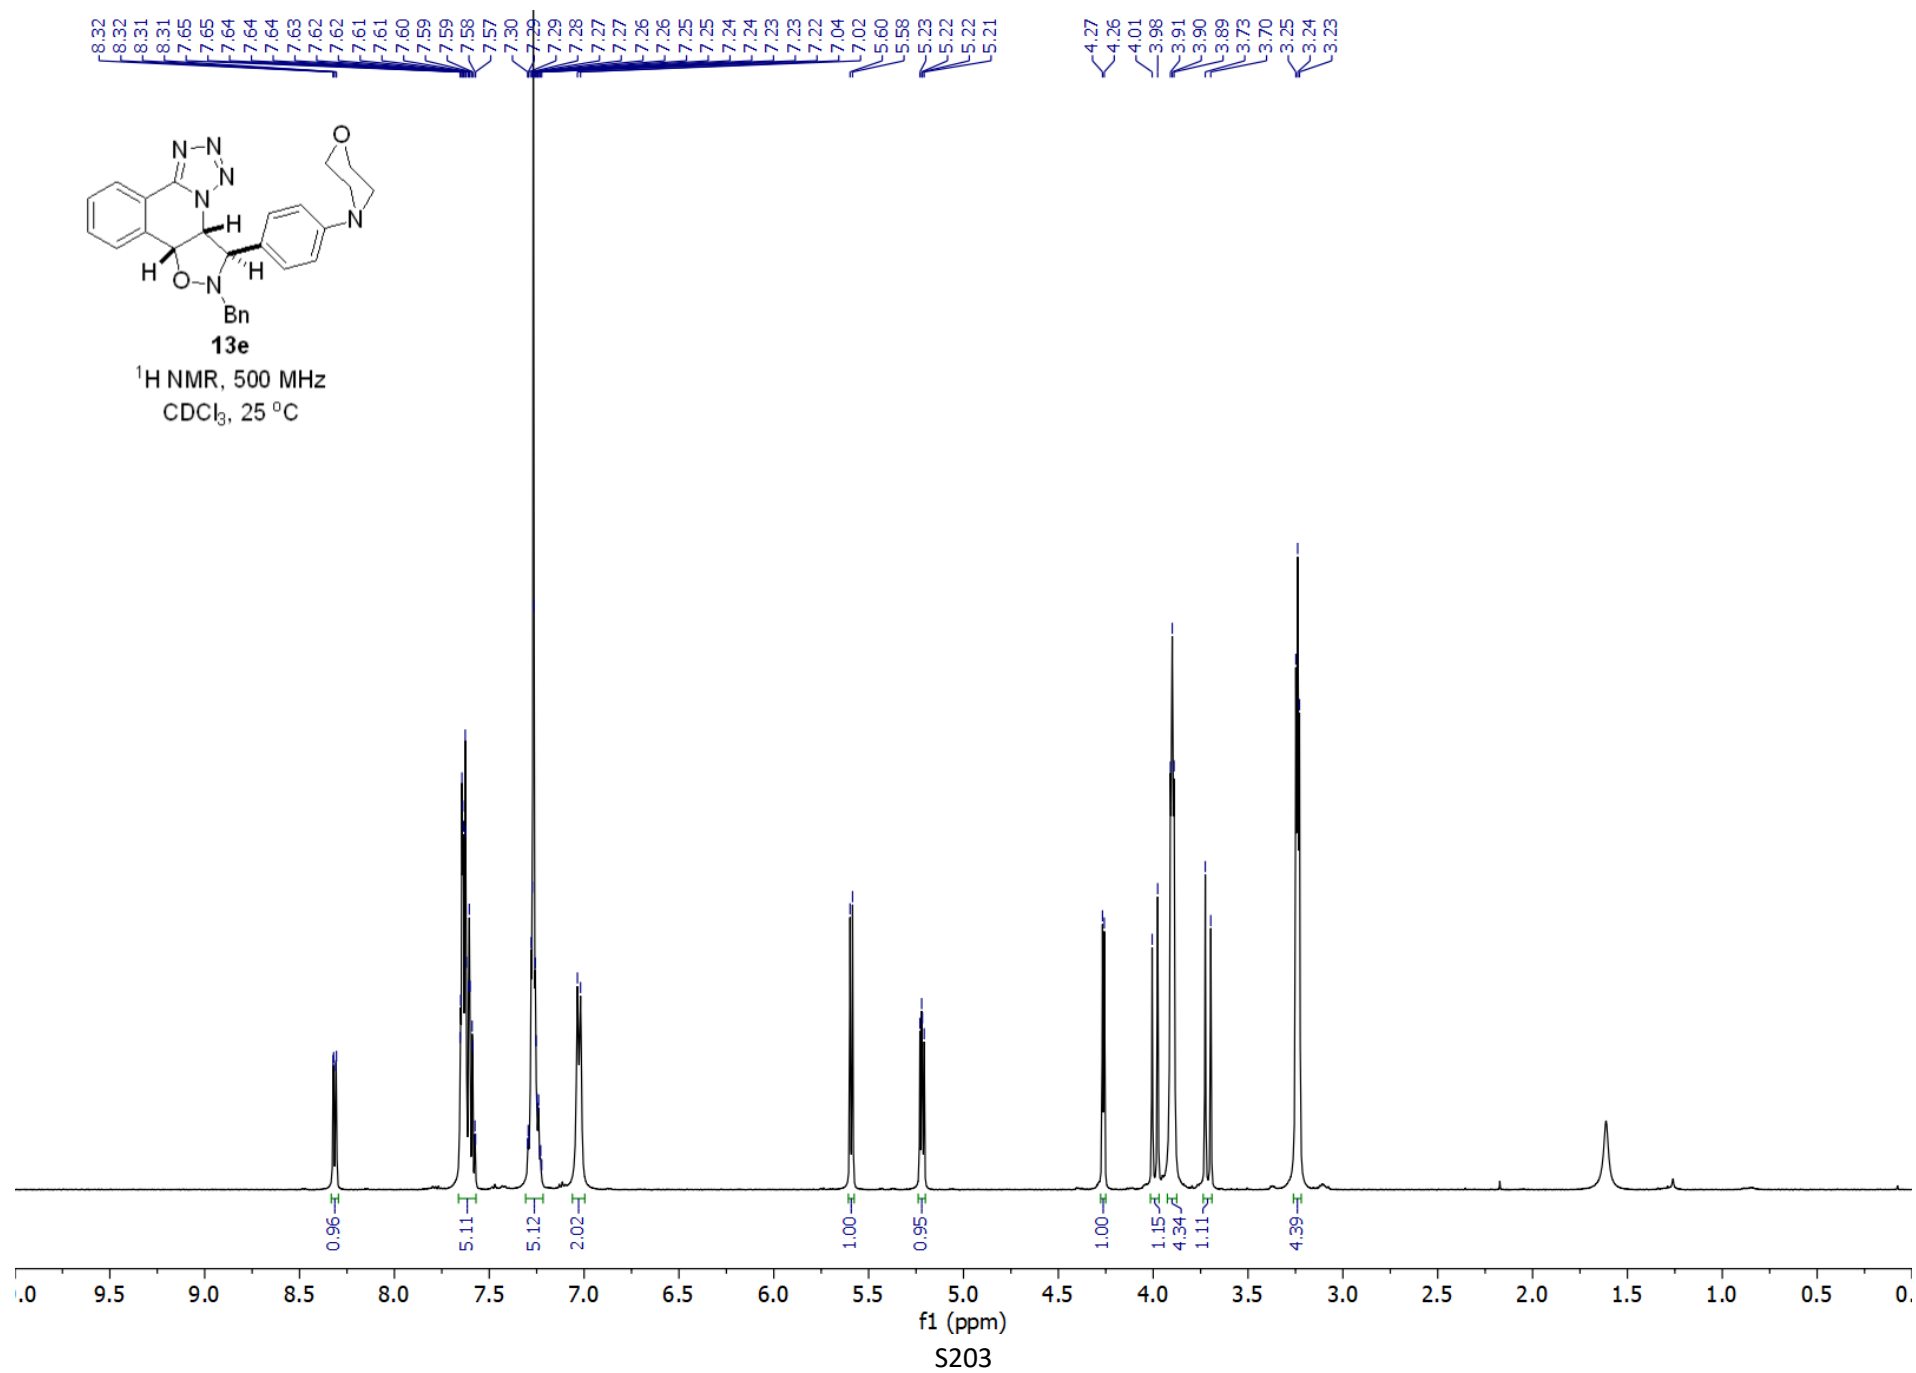

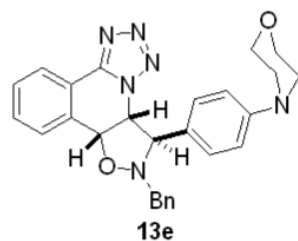

$^{13}\text{C}$  NMR, 125 MHz  
 $\text{CDCl}_3$ , 25  $^\circ\text{C}$

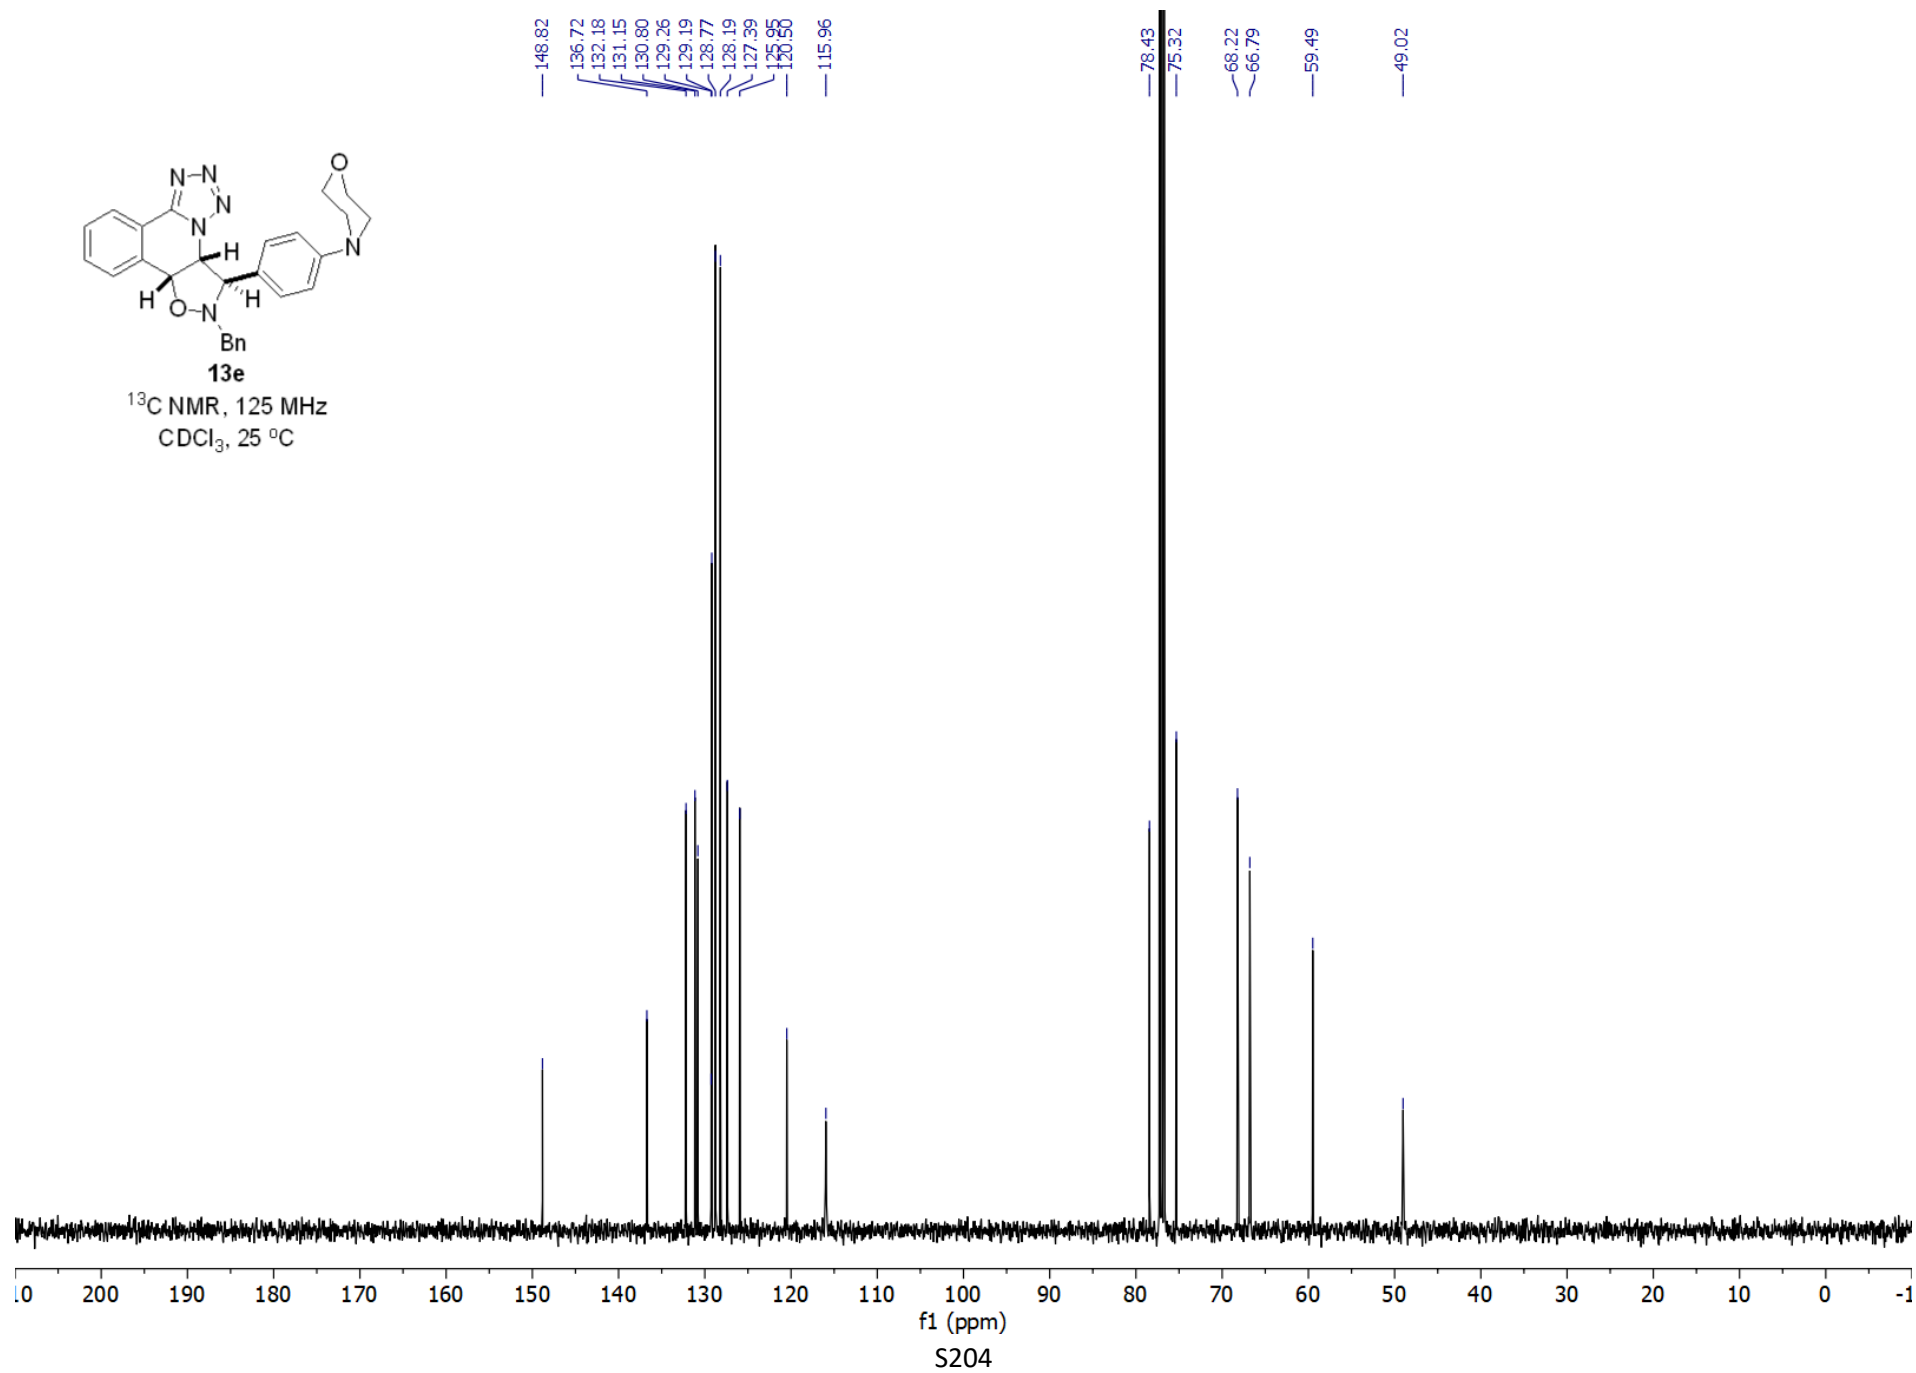

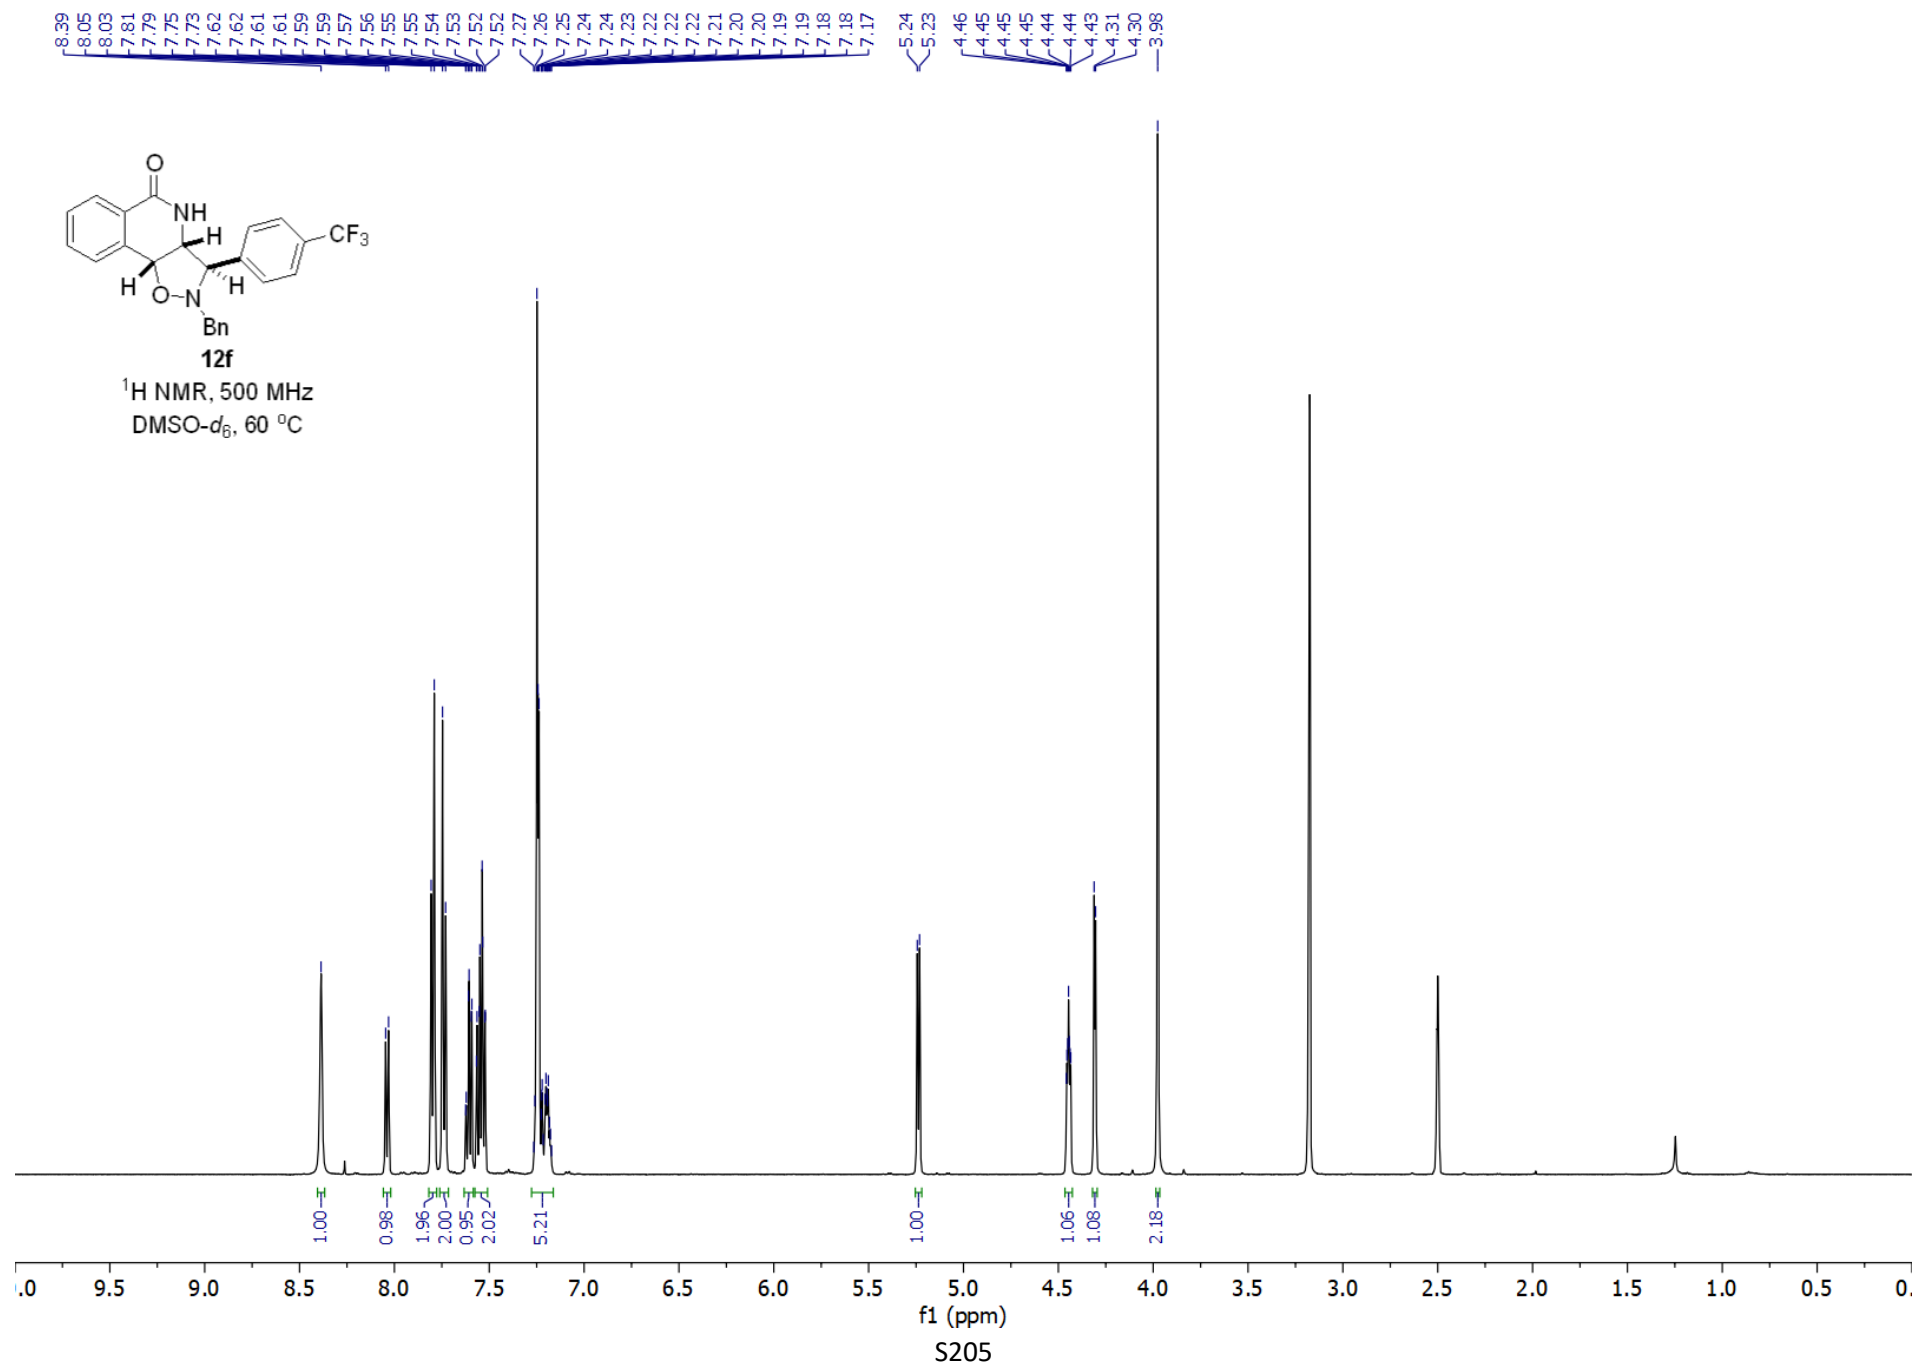

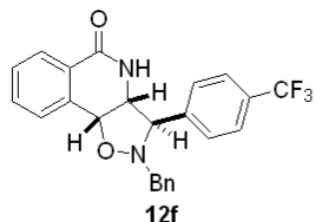

$^{13}\text{C}$  NMR, 125 MHz  
DMSO- $d_6$ , 60  $^{\circ}\text{C}$

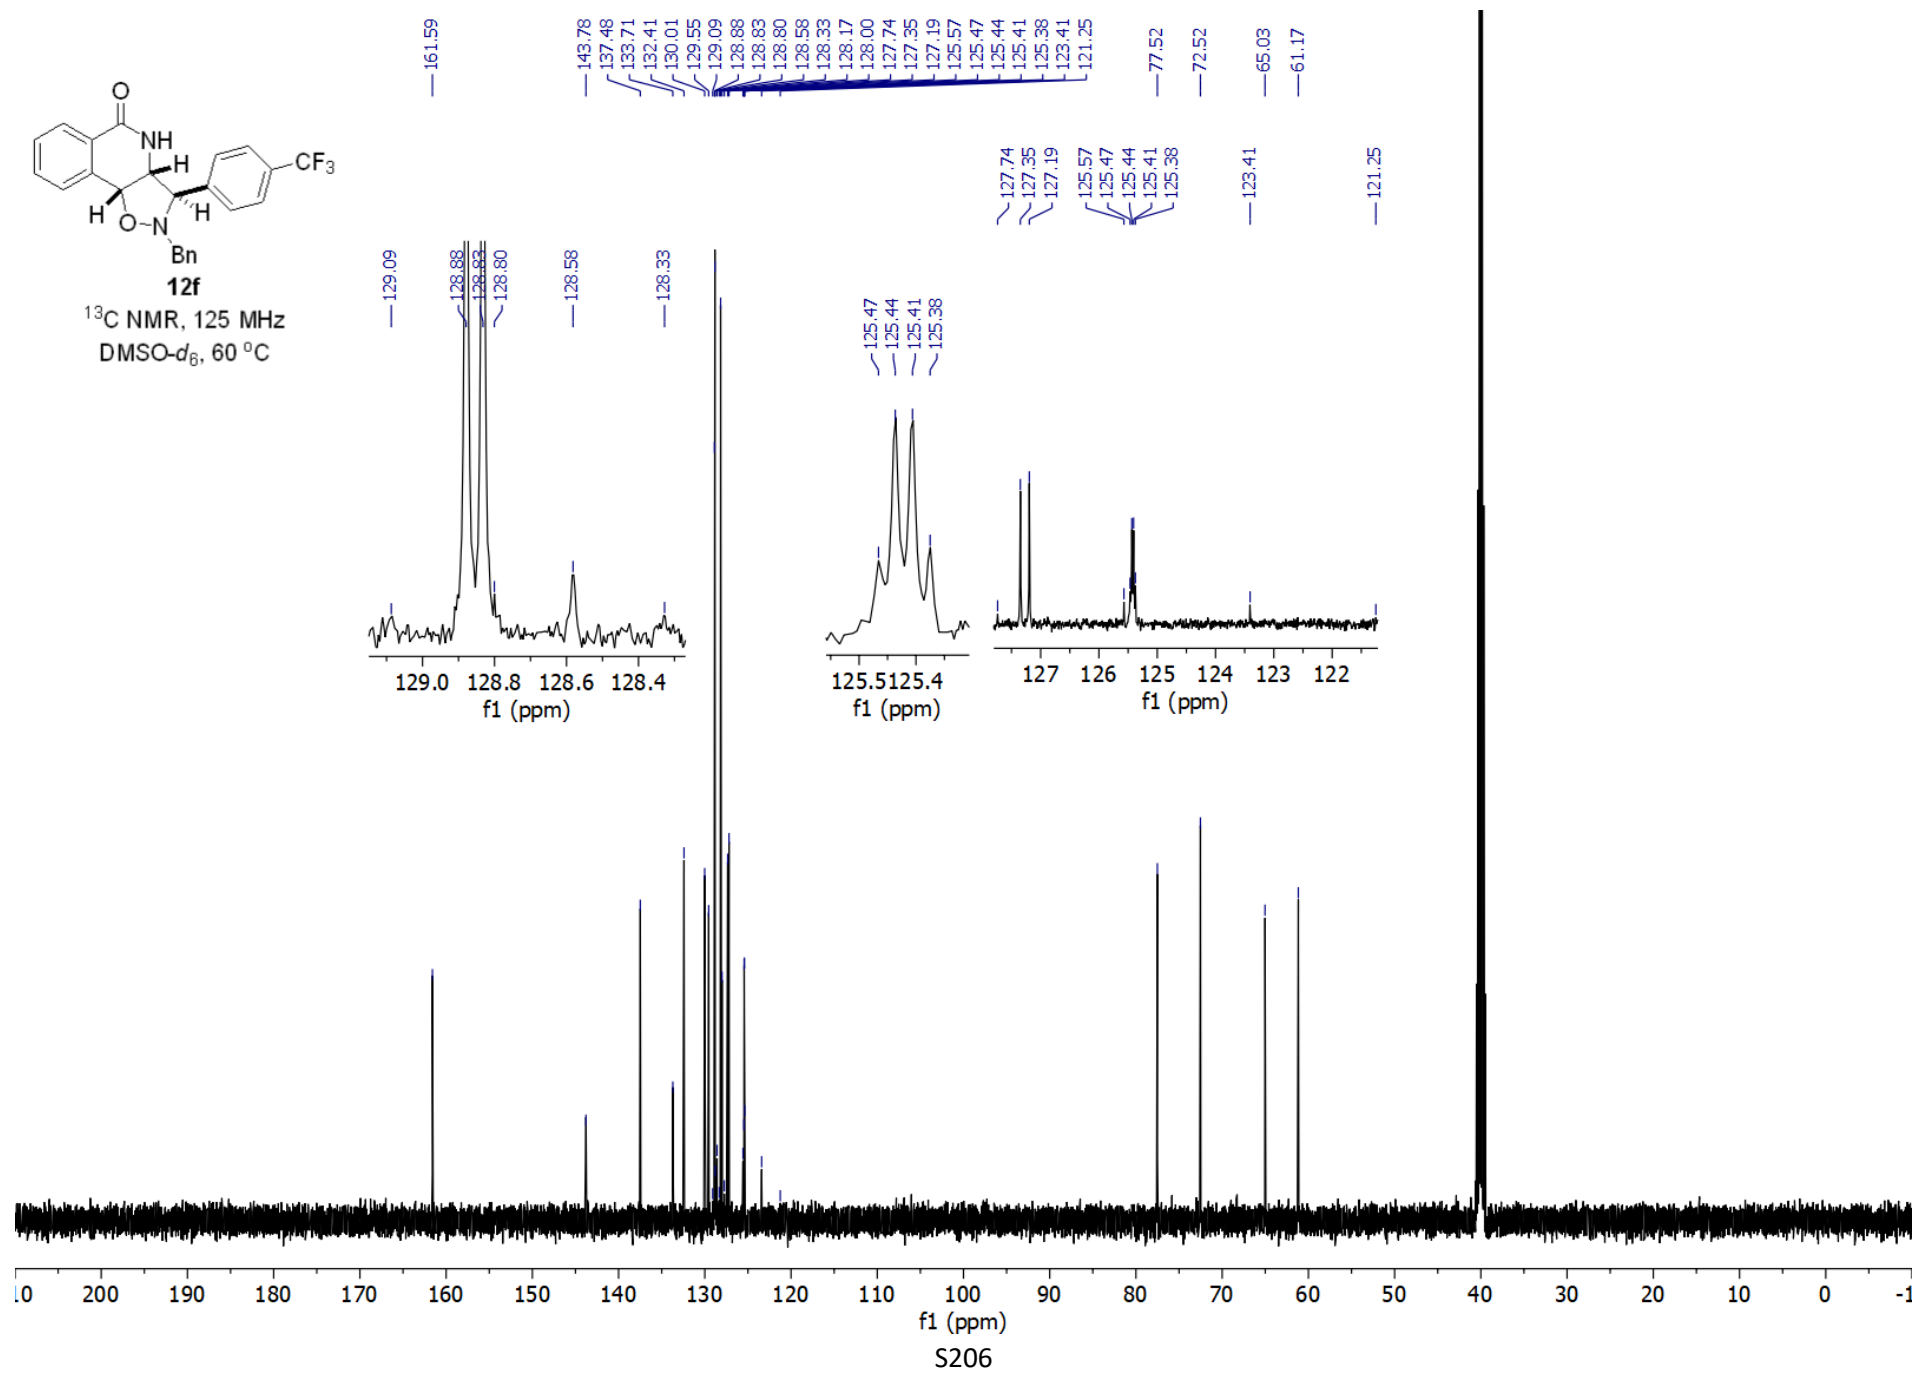

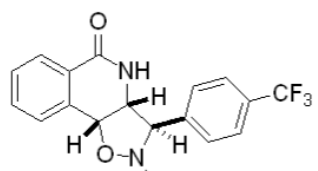

**12f**

$^{19}\text{F}$  NMR, 470 MHz

DMSO- $d_6$ , 25 °C

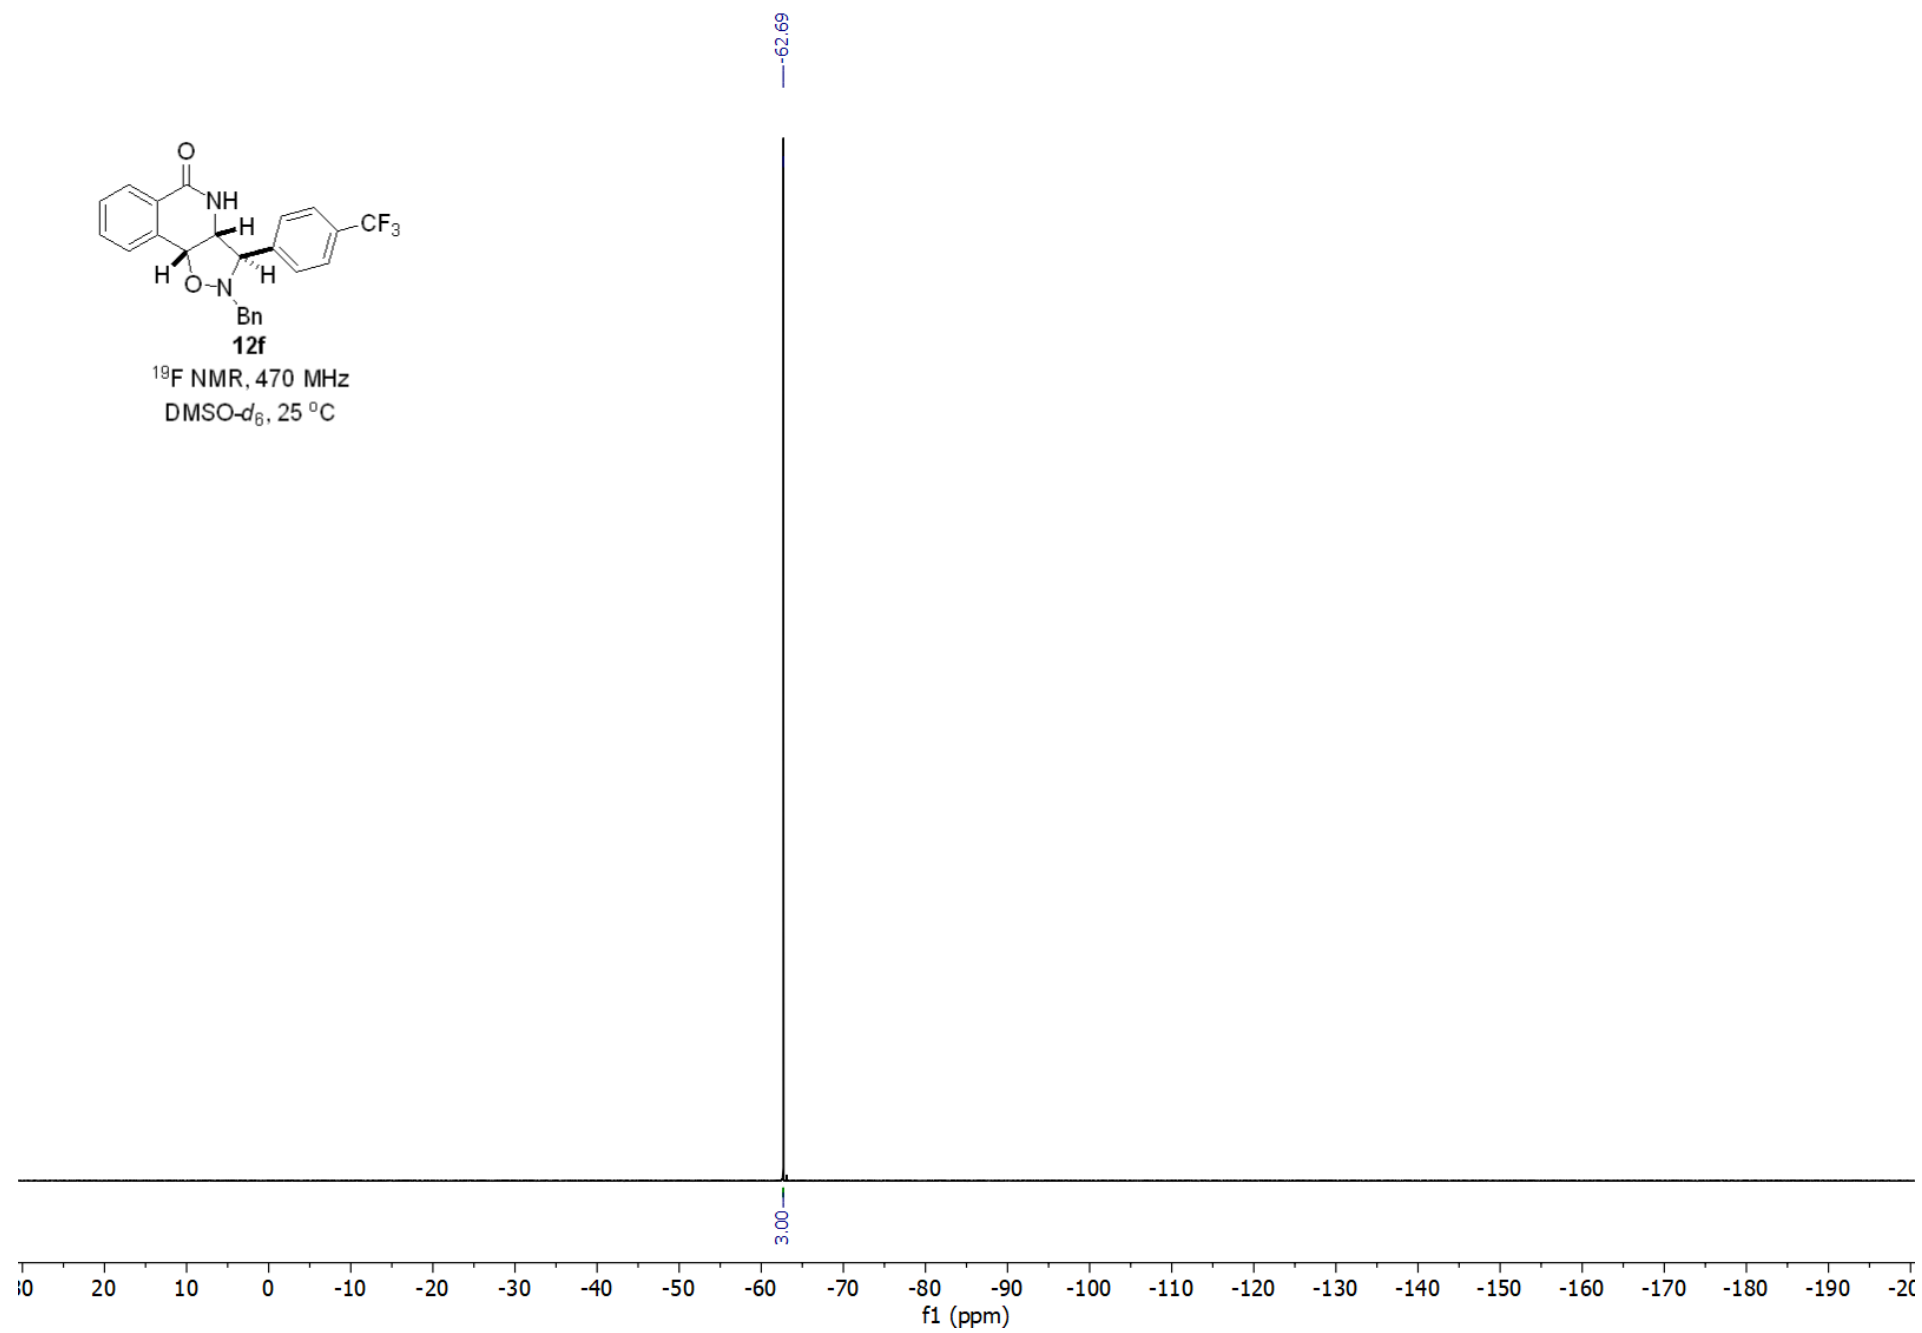

S207

8.34  
8.33  
8.32  
8.32  
7.90  
7.89  
7.75  
7.73  
7.68  
7.67  
7.66  
7.66  
7.65  
7.64  
7.63  
7.62  
7.62  
7.60  
7.60  
7.29  
7.28  
7.28  
7.27  
7.27  
7.26  
7.26  
7.25  
7.25  
7.24  
7.24  
7.23  
7.23  
7.22  
7.22  
5.61  
5.60  
5.23  
5.22  
5.22  
5.21  
  
4.47  
4.46  
  
3.96  
3.93  
3.87  
3.84

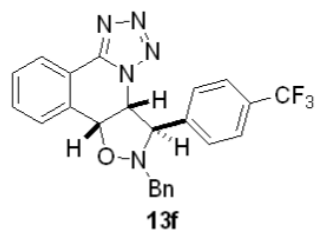

$^1\text{H}$  NMR, 500 MHz  
 $\text{CDCl}_3$ , 25  $^\circ\text{C}$

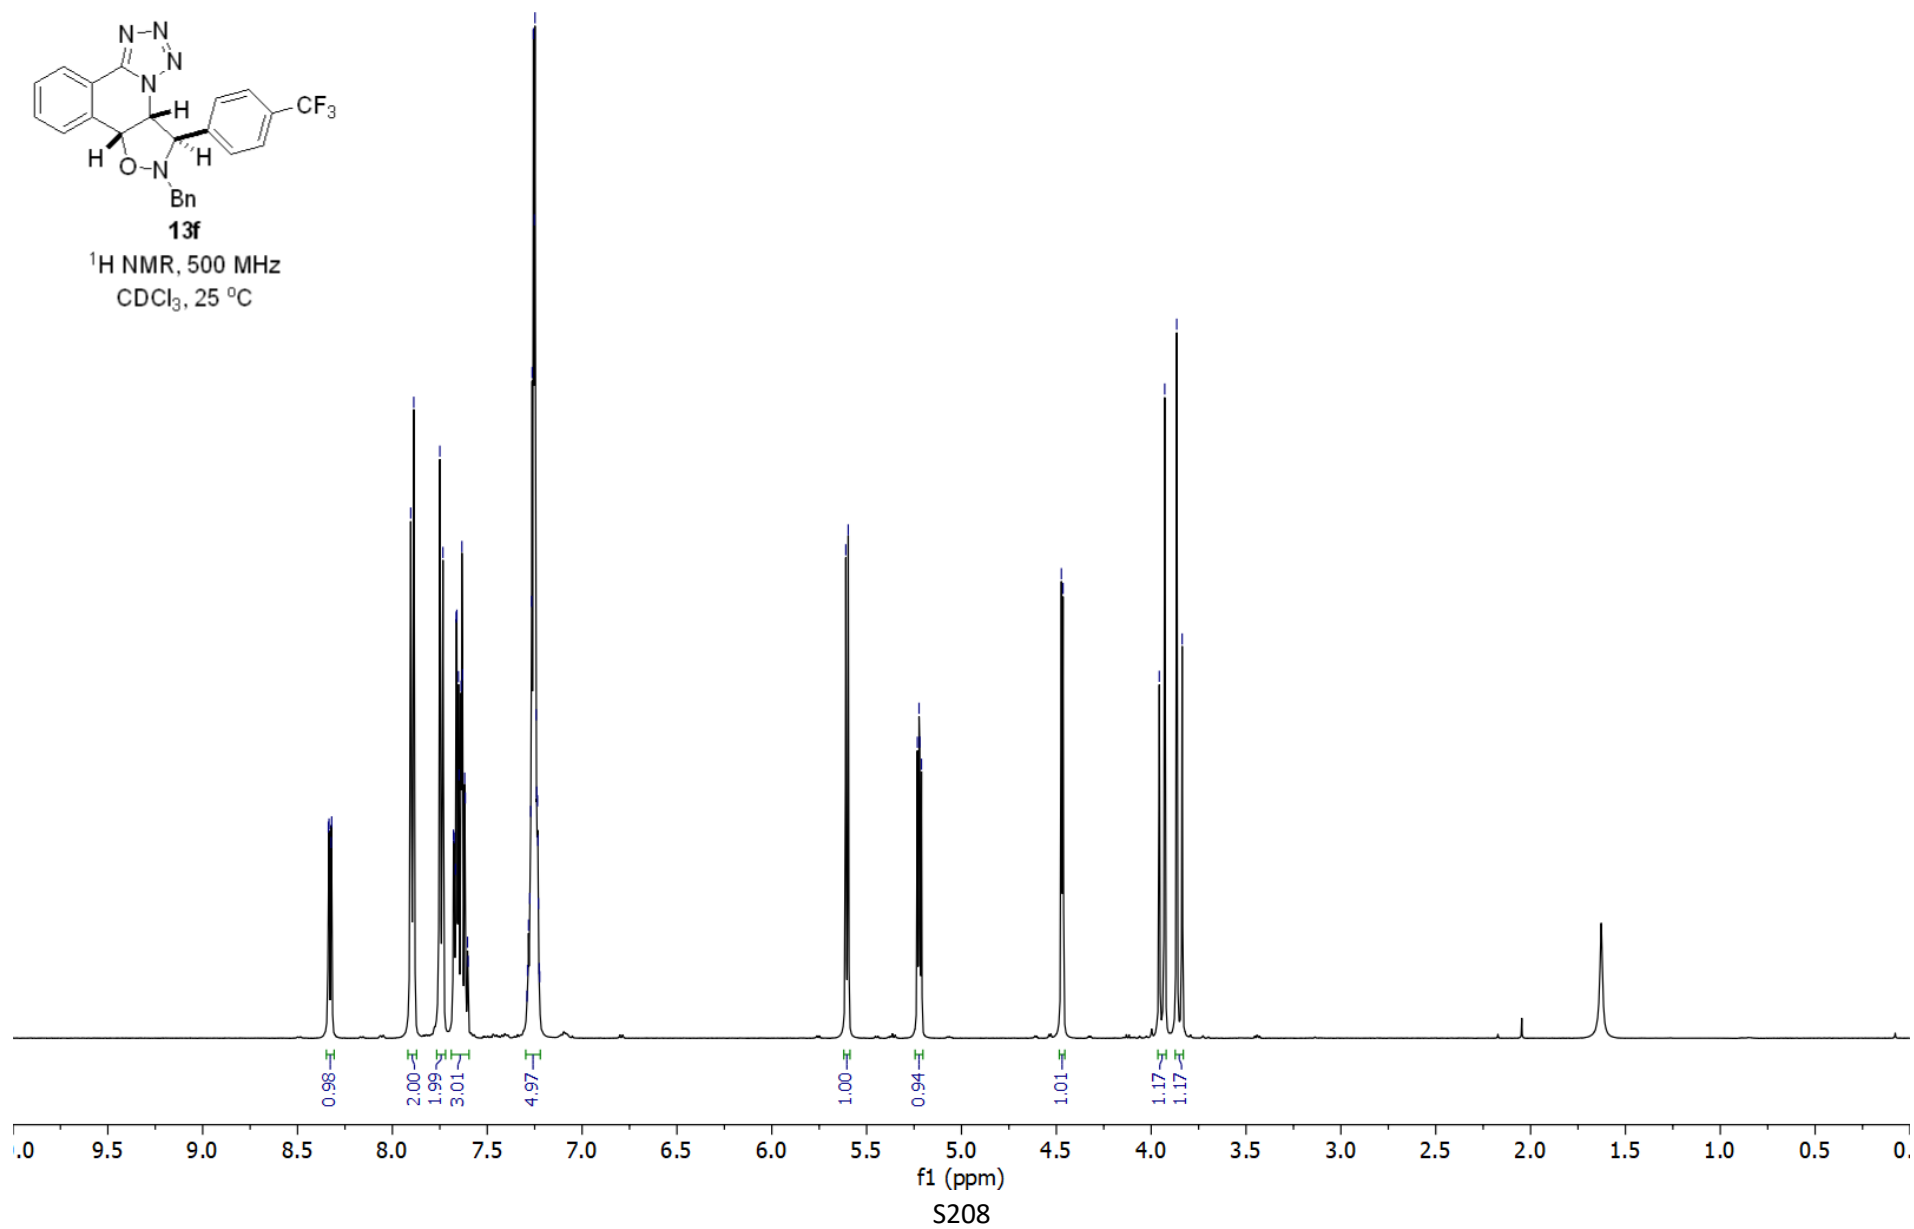

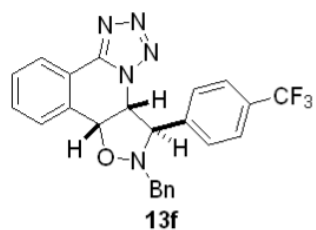

$^{13}\text{C}$  NMR, 125 MHz  
 $\text{CDCl}_3$ , 25  $^\circ\text{C}$

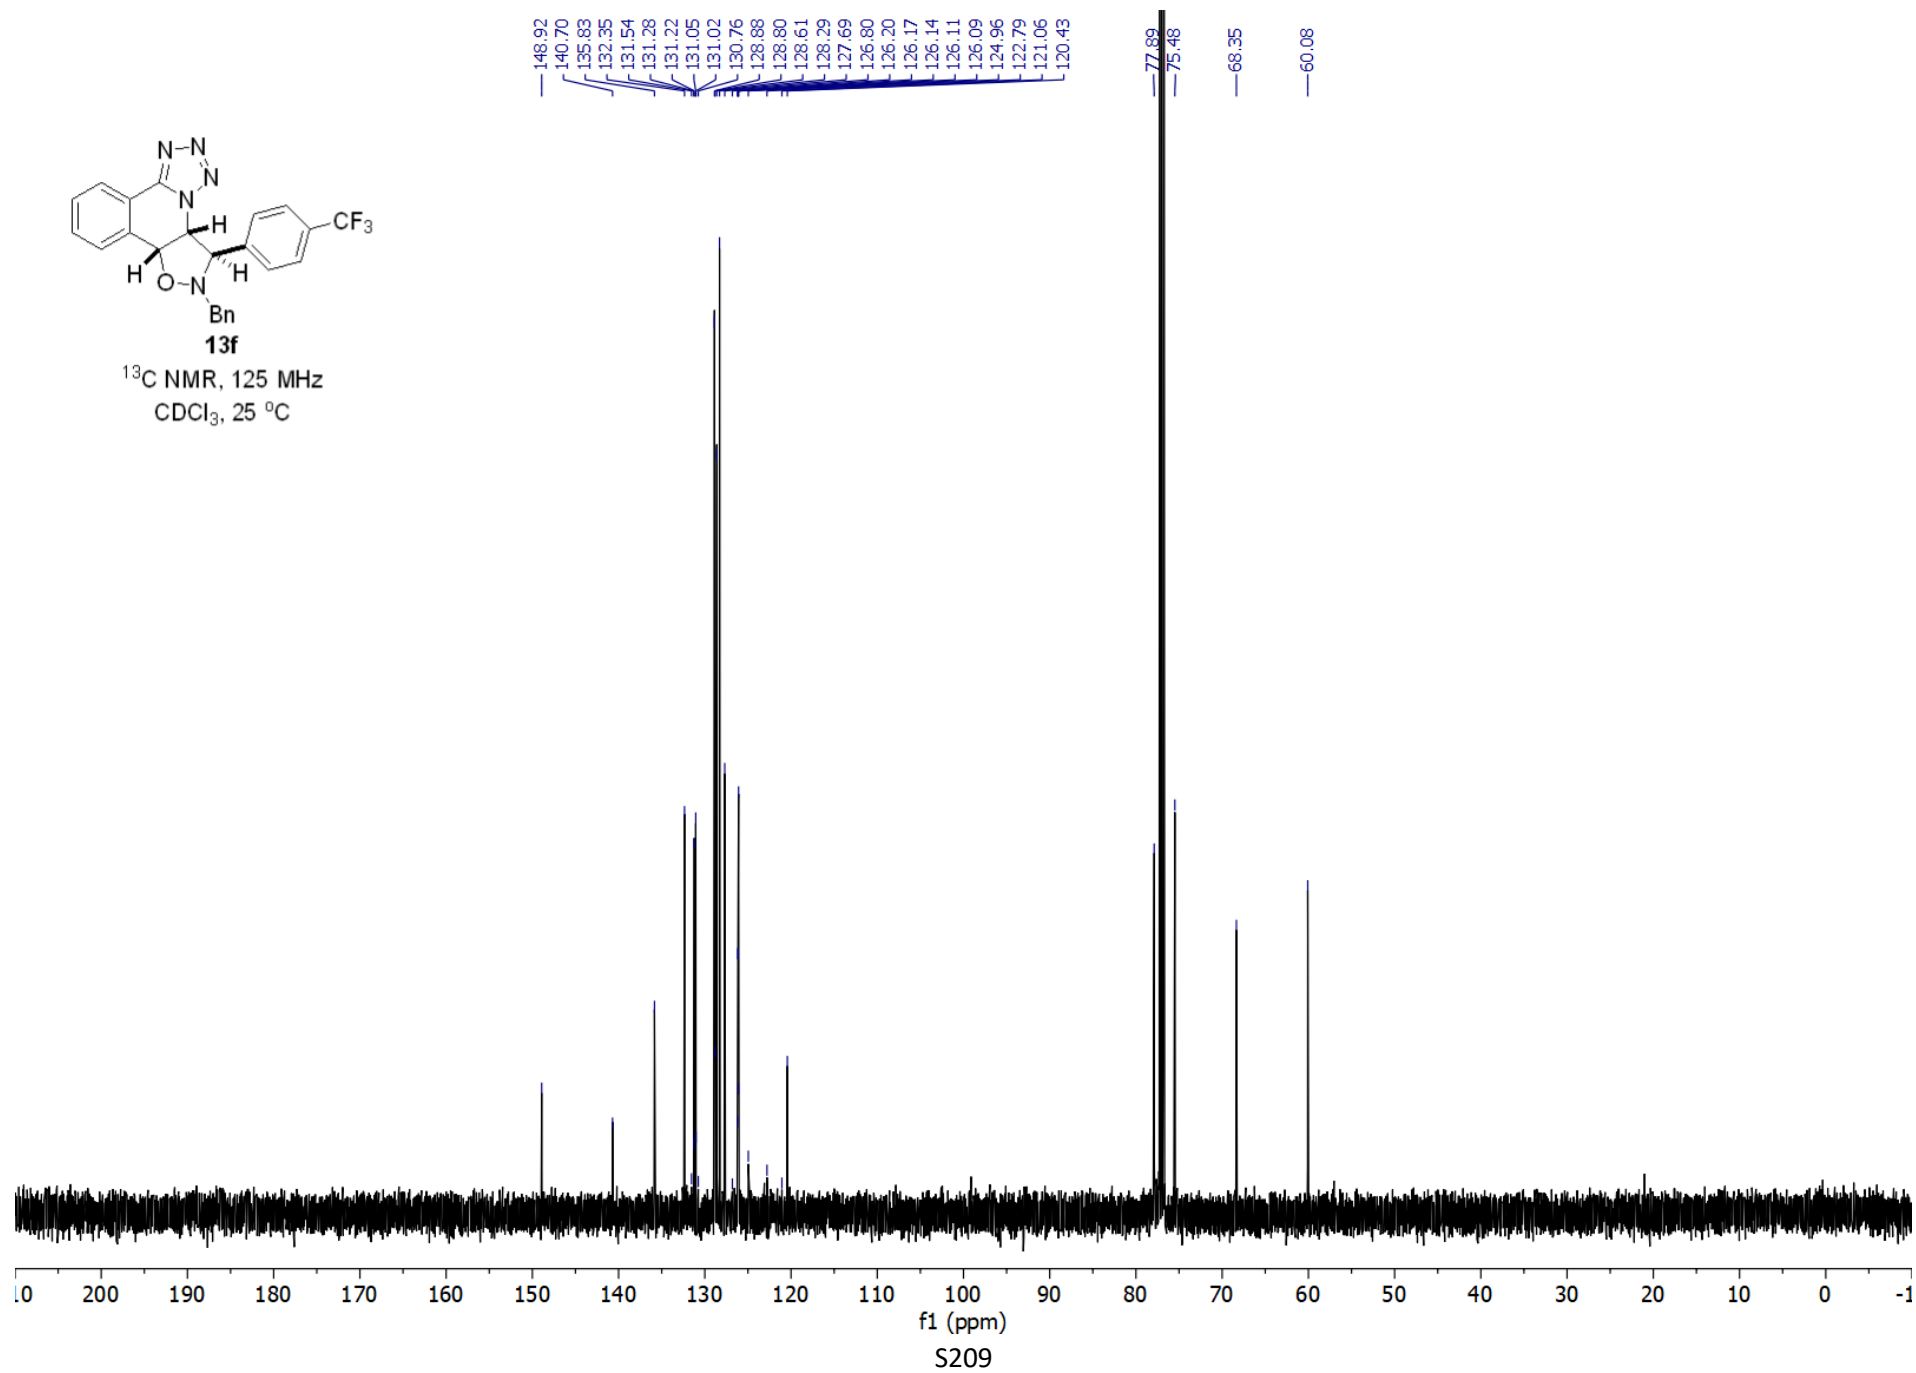

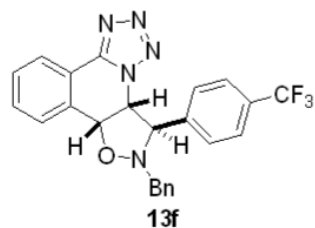

$^{19}\text{F}$  NMR, 470 MHz  
 $\text{CDCl}_3$ , 25  $^\circ\text{C}$

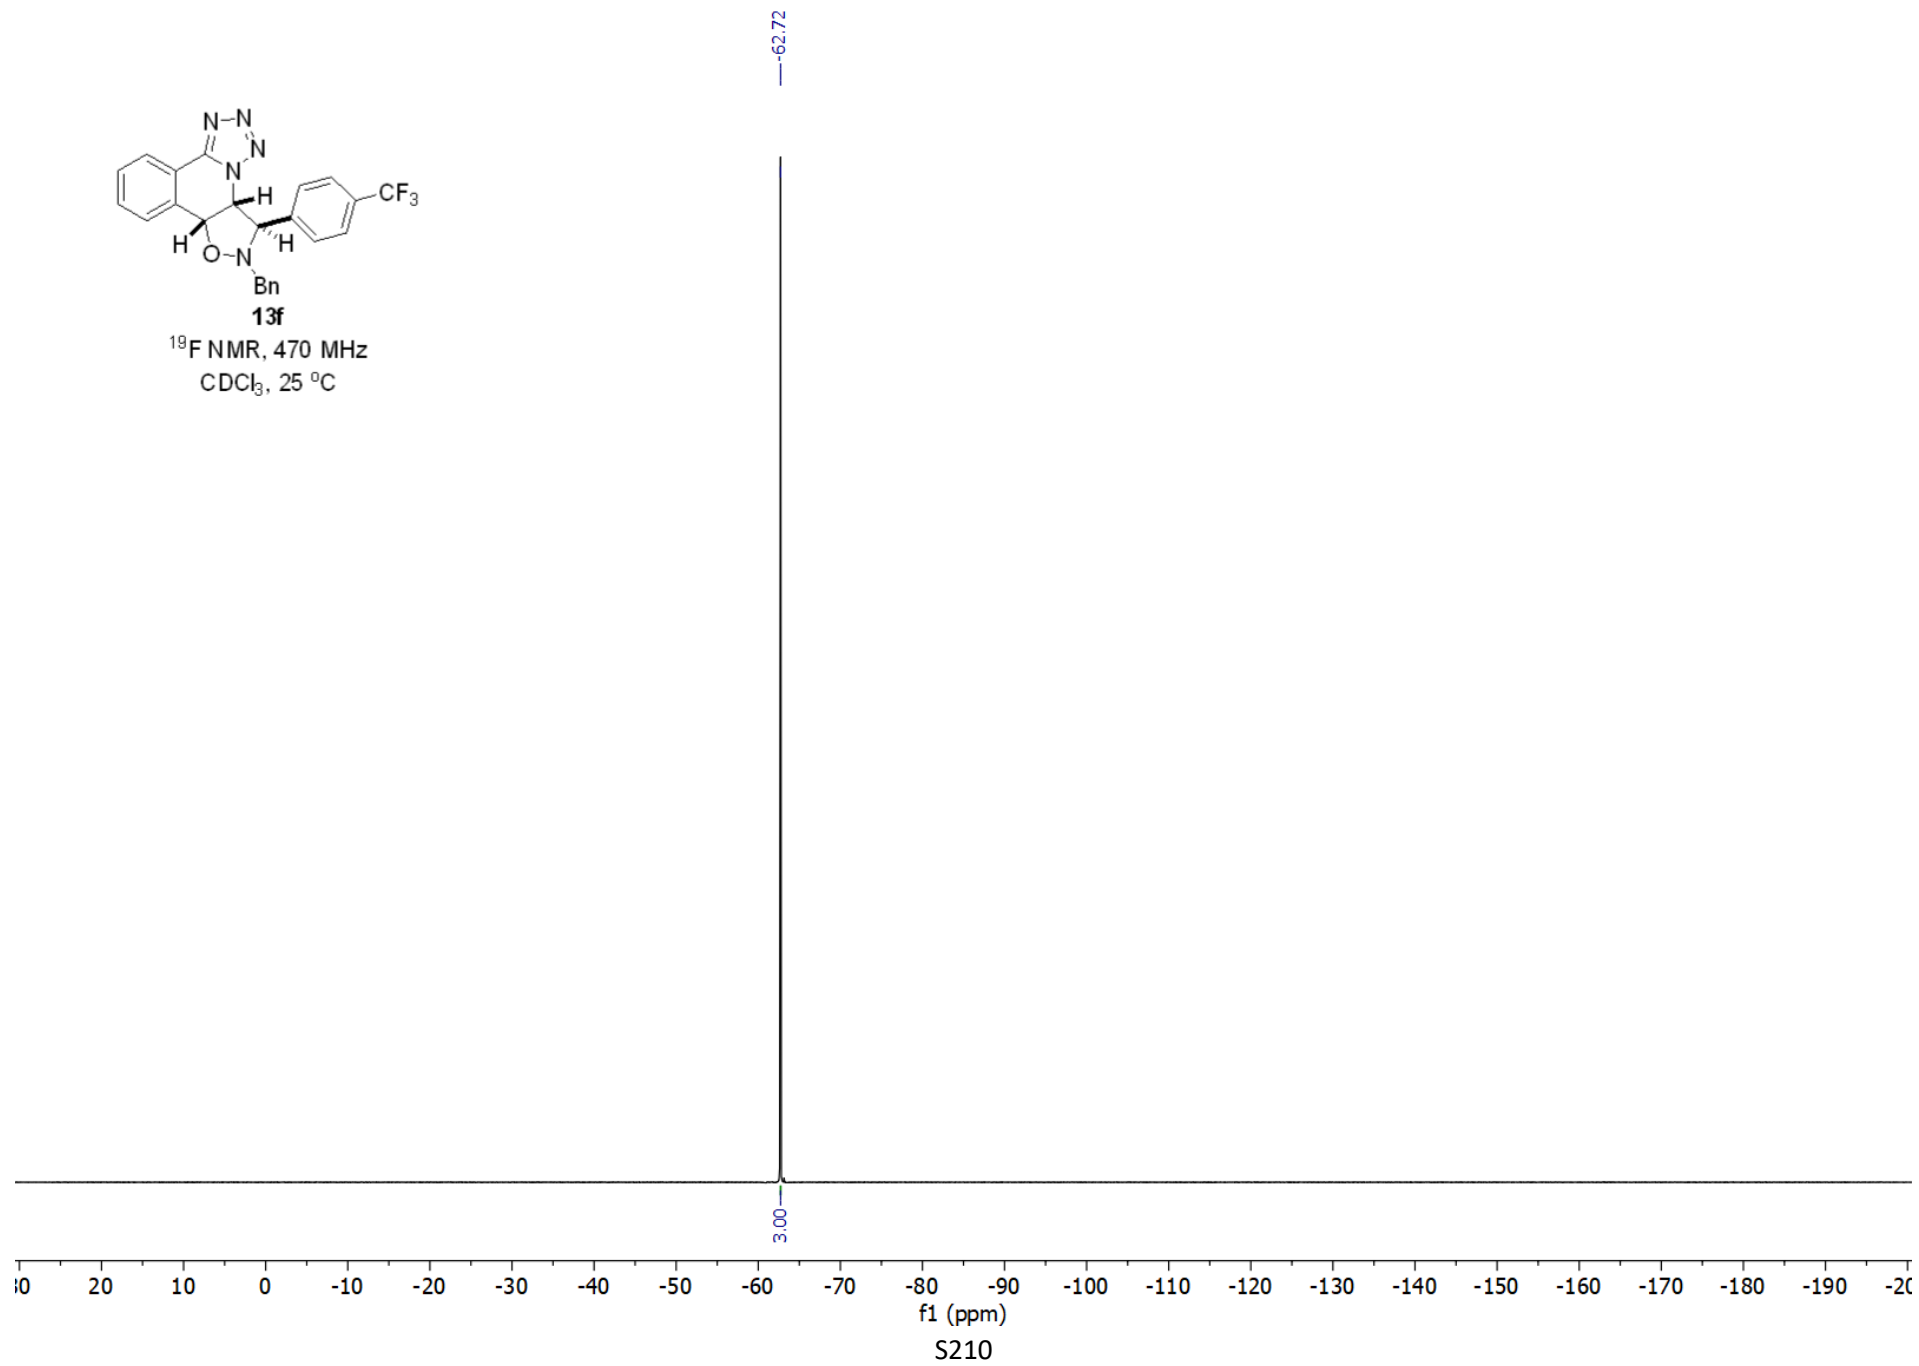

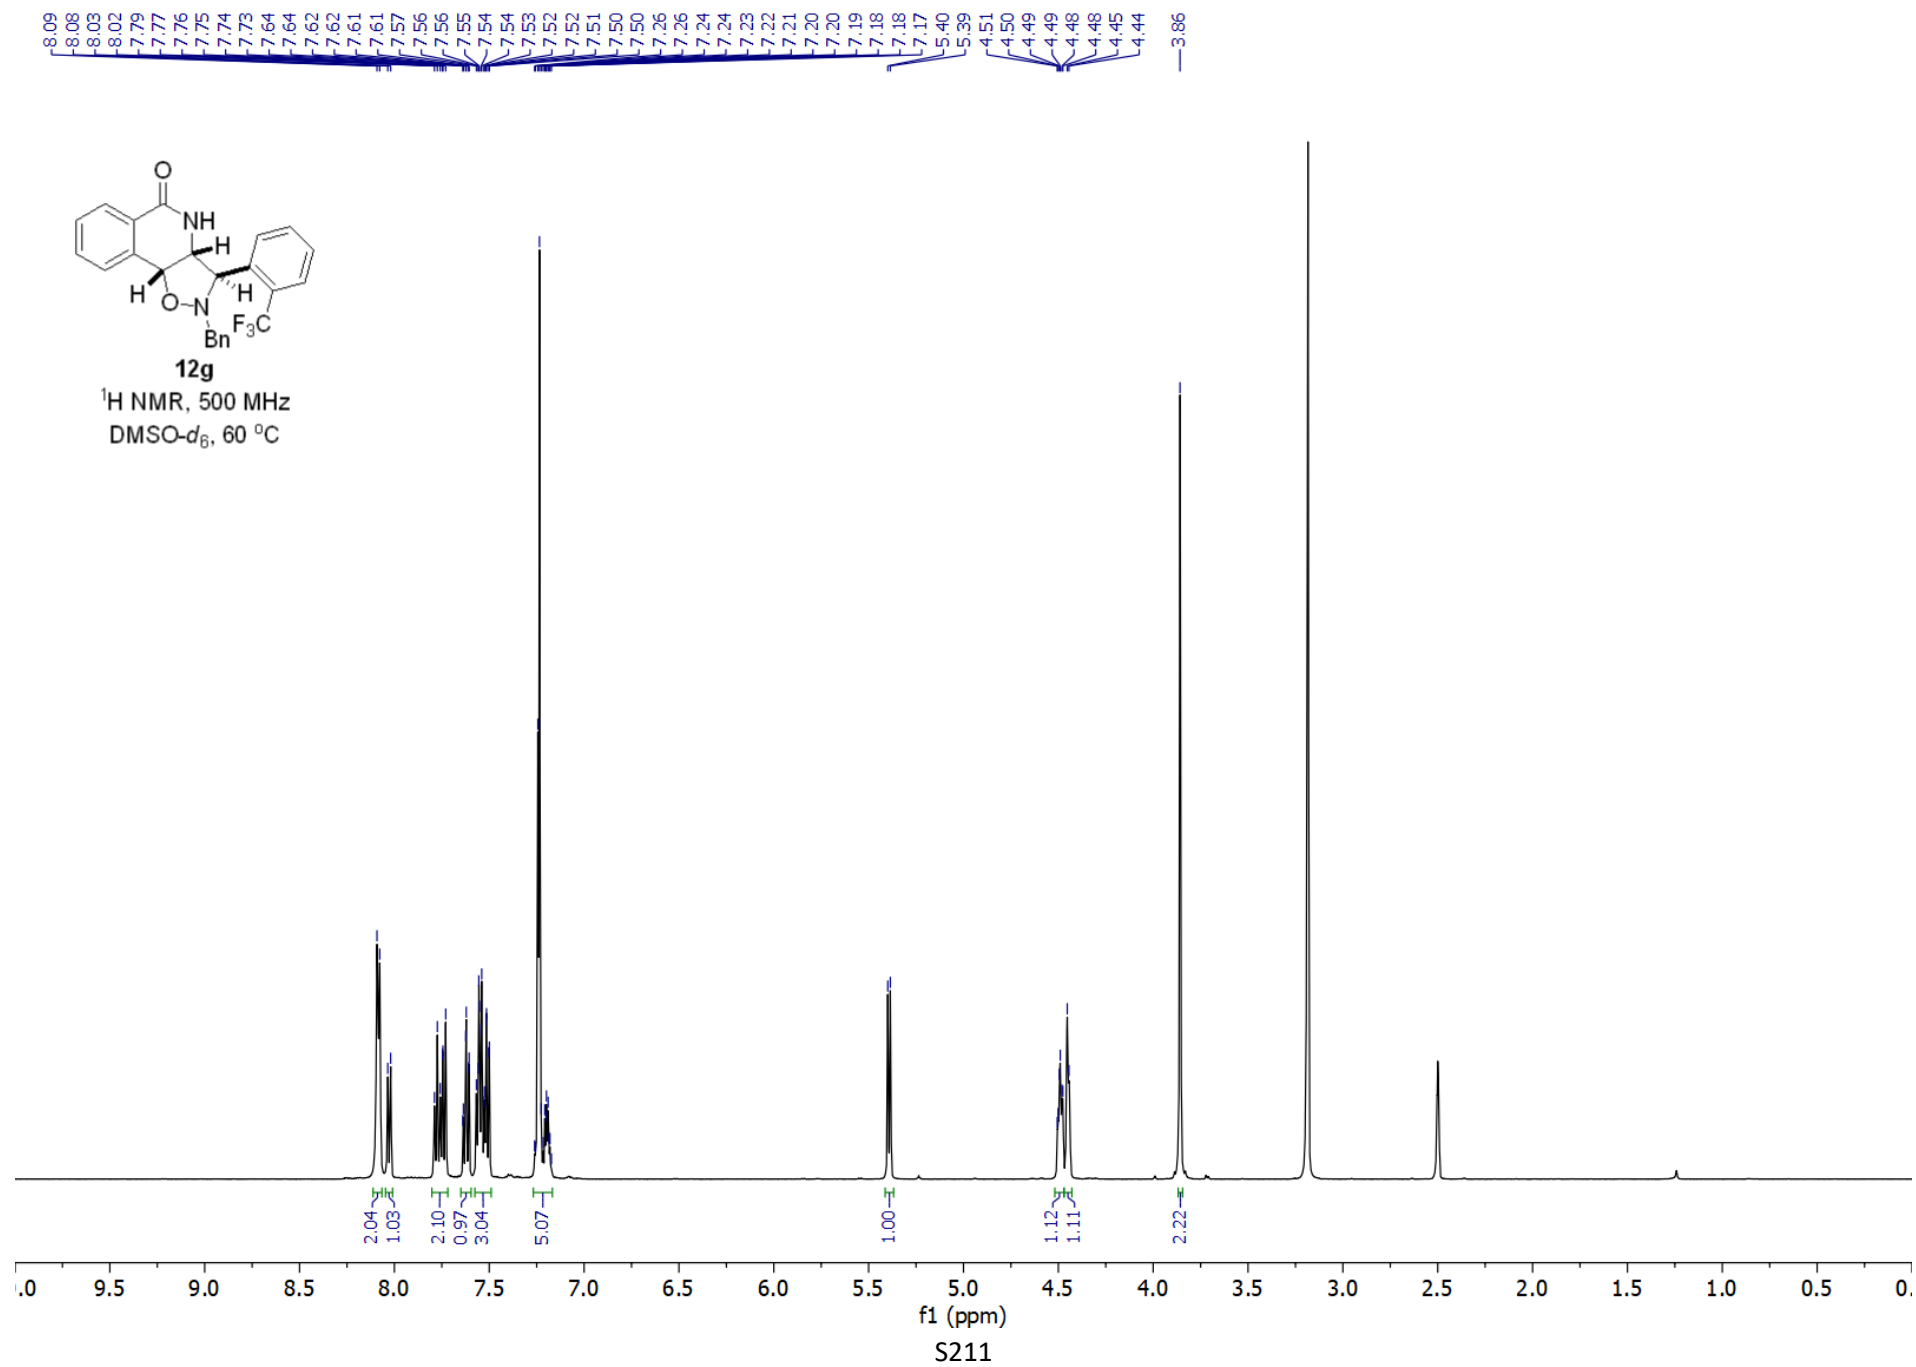

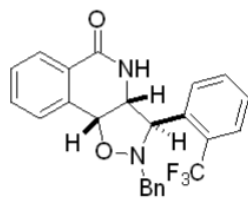

**12g**

$^{13}\text{C}$  NMR, 125 MHz  
DMSO- $d_6$ , 60 °C

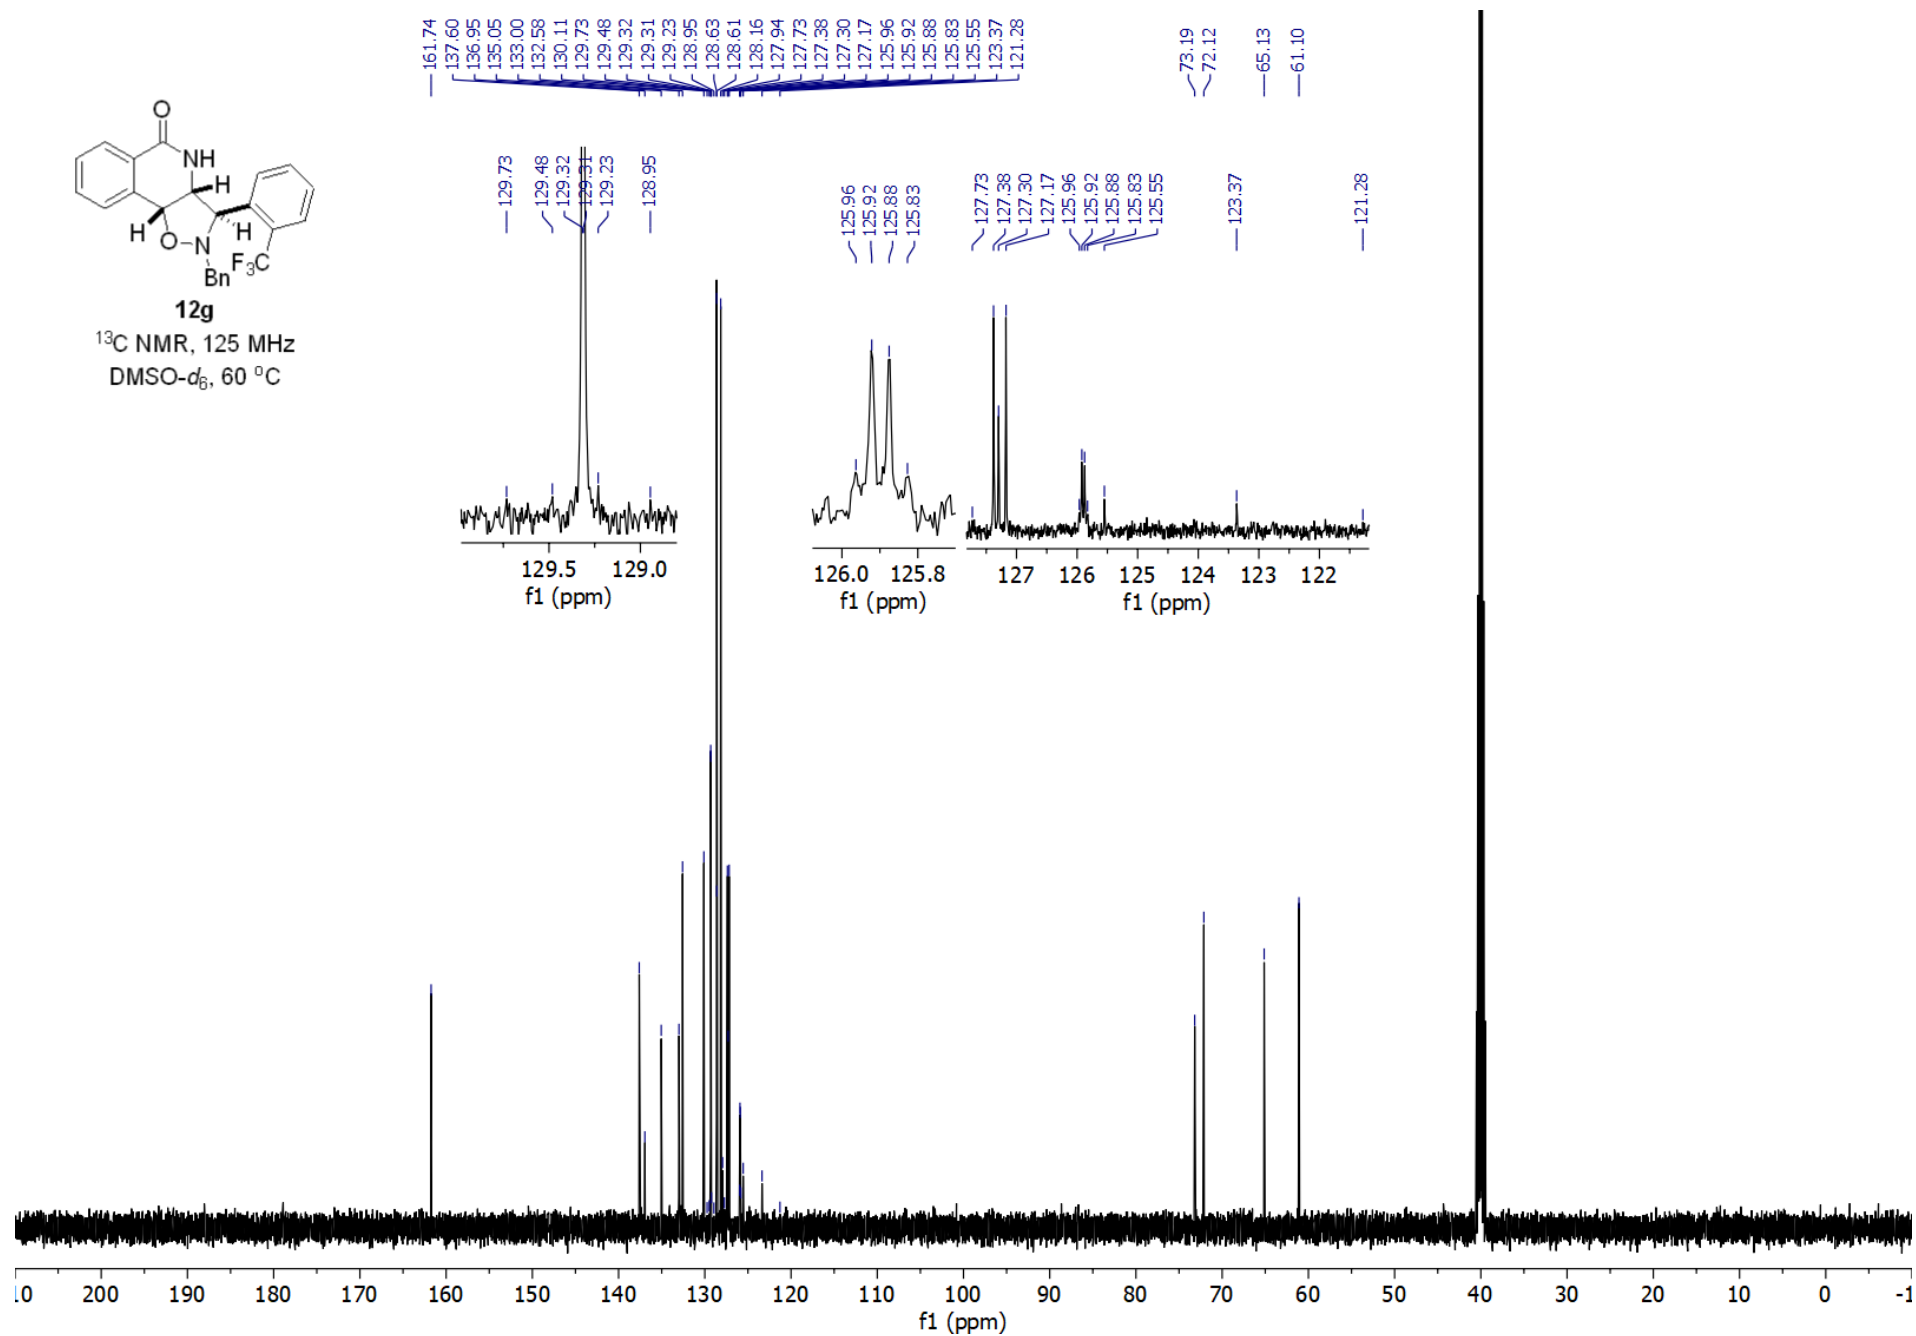

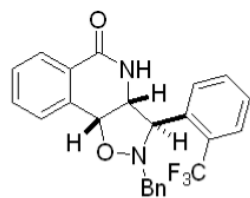

**12g**

$^{19}\text{F}$  NMR, 470 MHz

$\text{DMSO}-d_6$ , 25  $^{\circ}\text{C}$

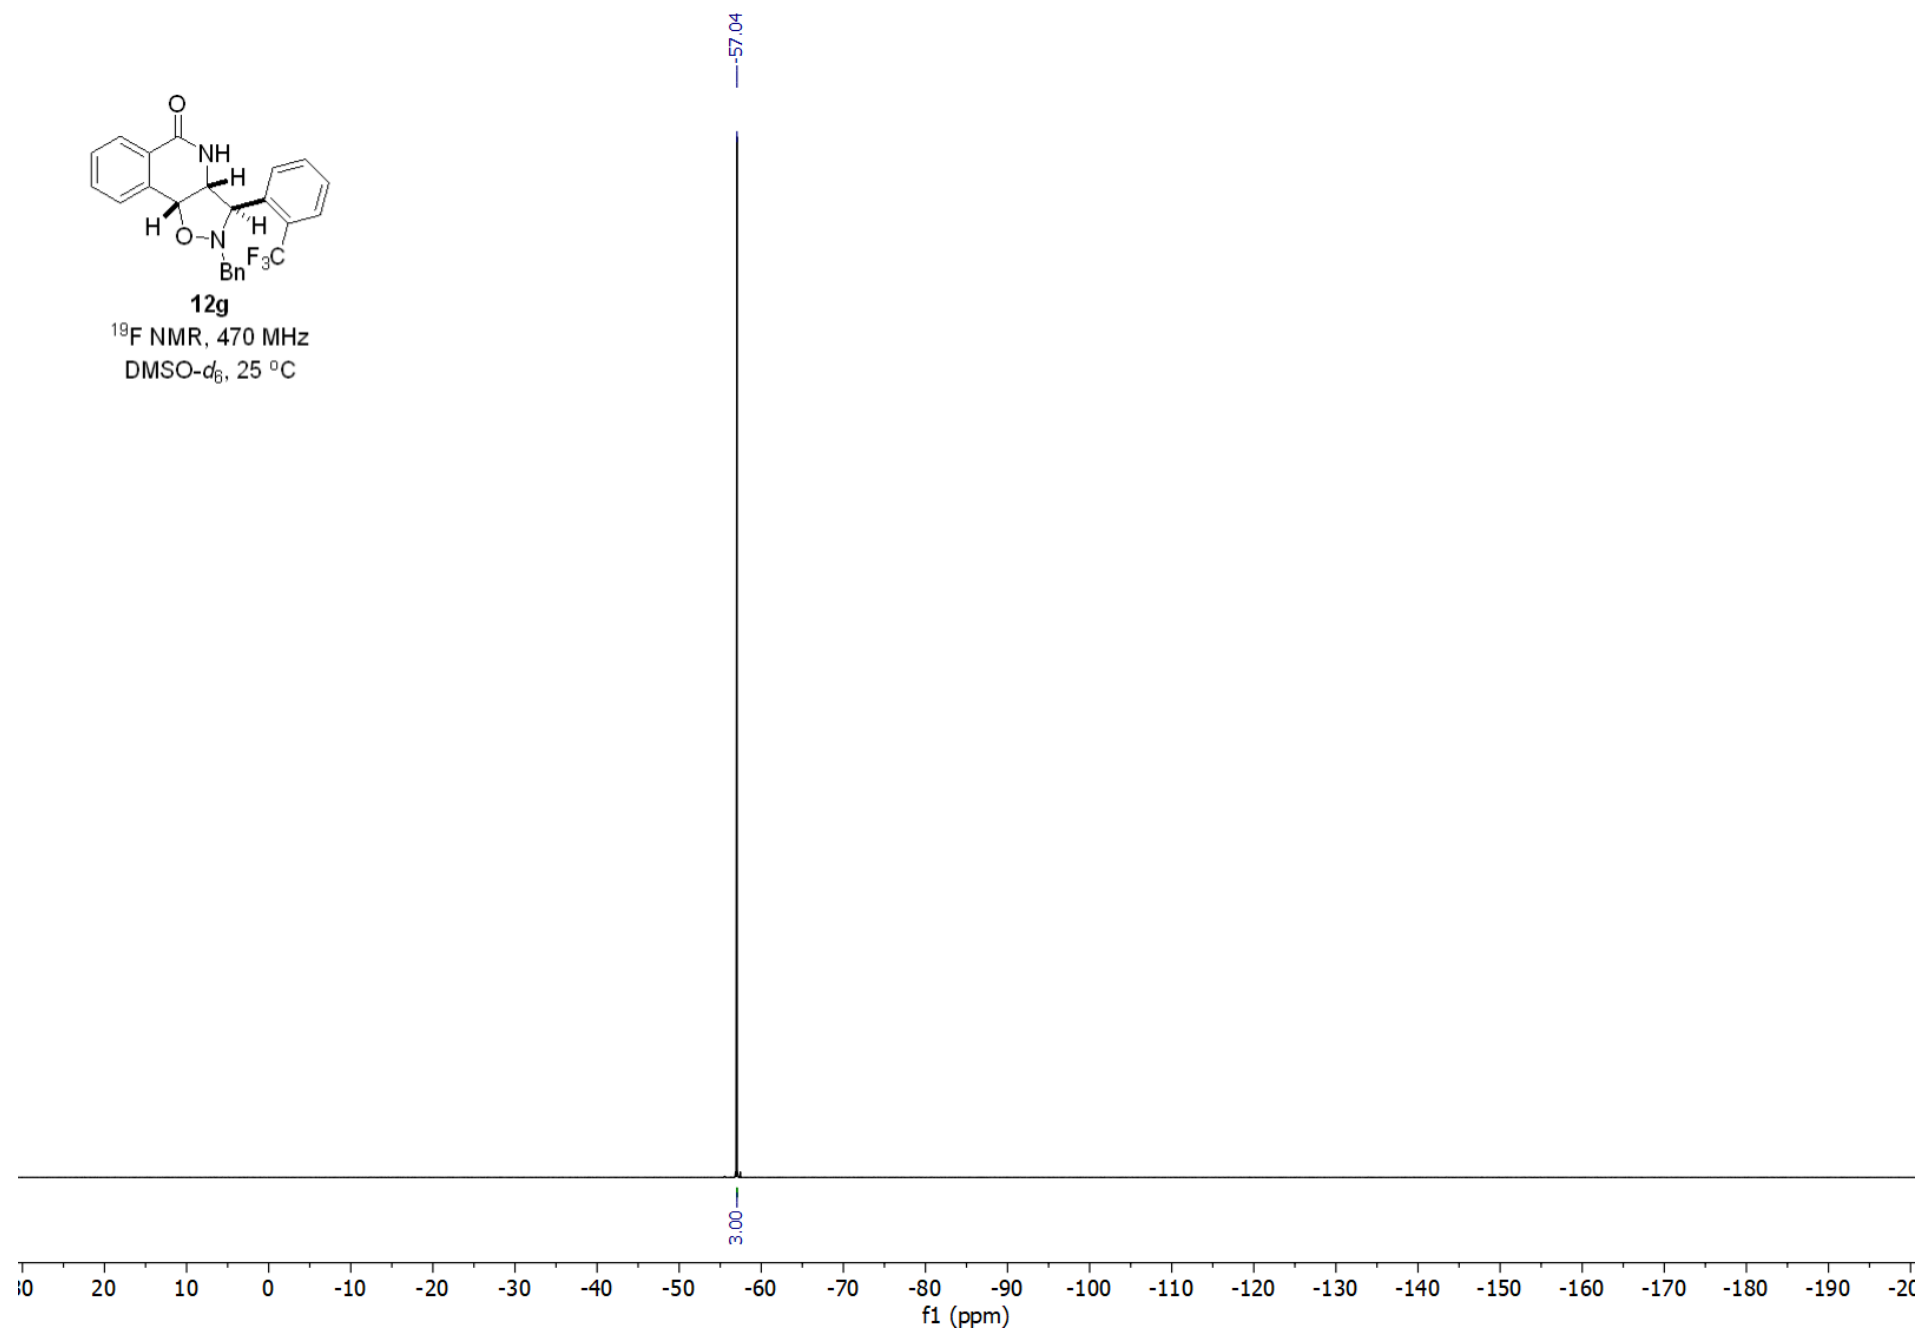

S213

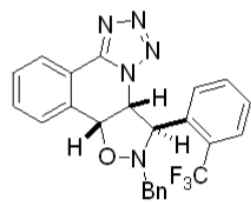

**13g**

<sup>1</sup>H NMR, 500 MHz  
CDCl<sub>3</sub>, 25 °C

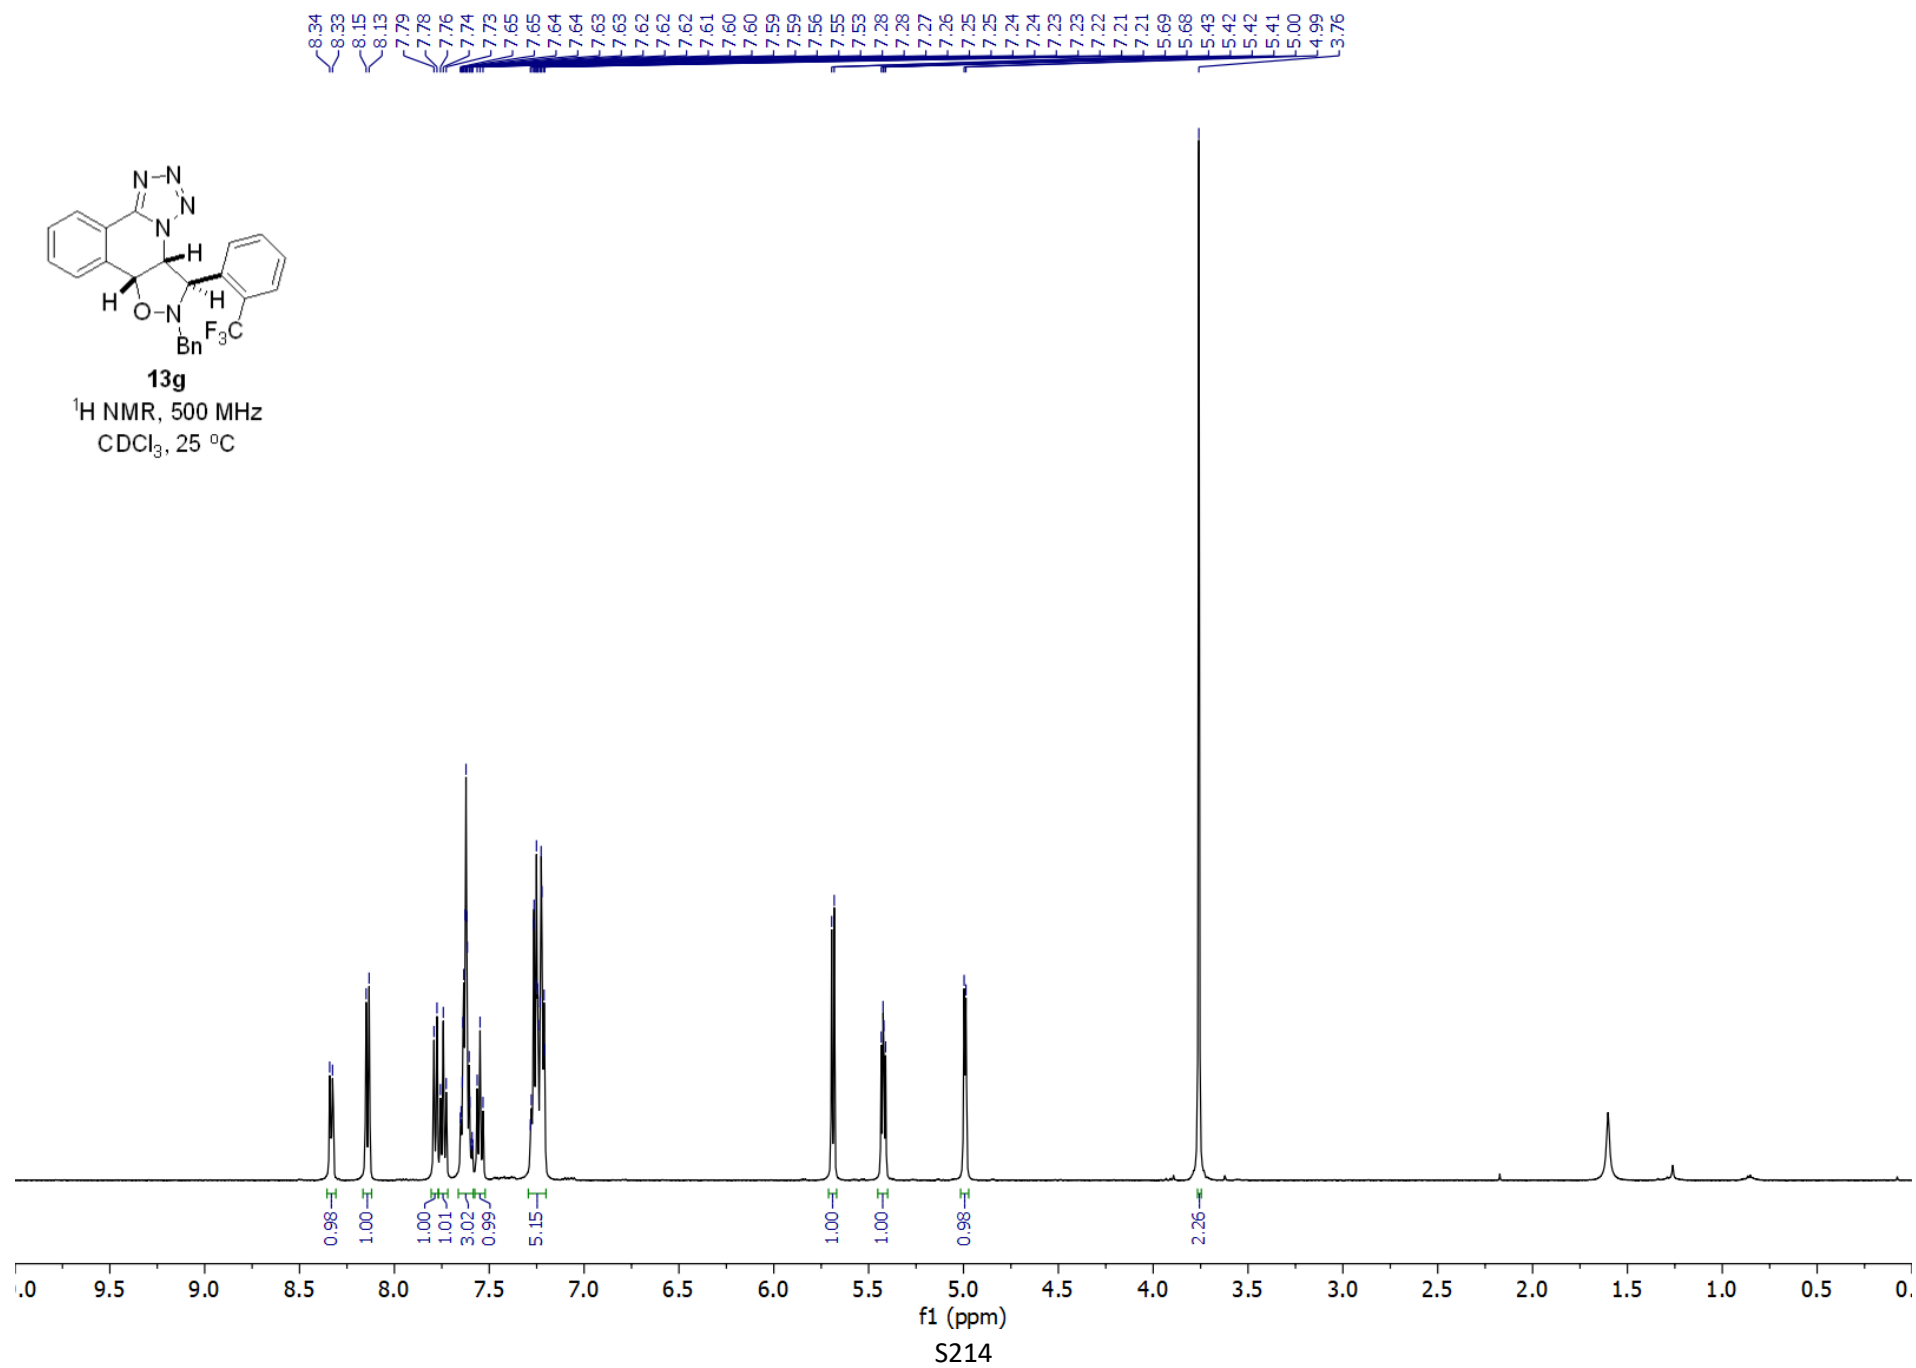

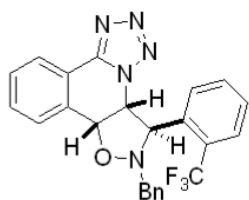

**13g**

<sup>13</sup>C NMR, 125 MHz  
CDCl<sub>3</sub>, 25 °C

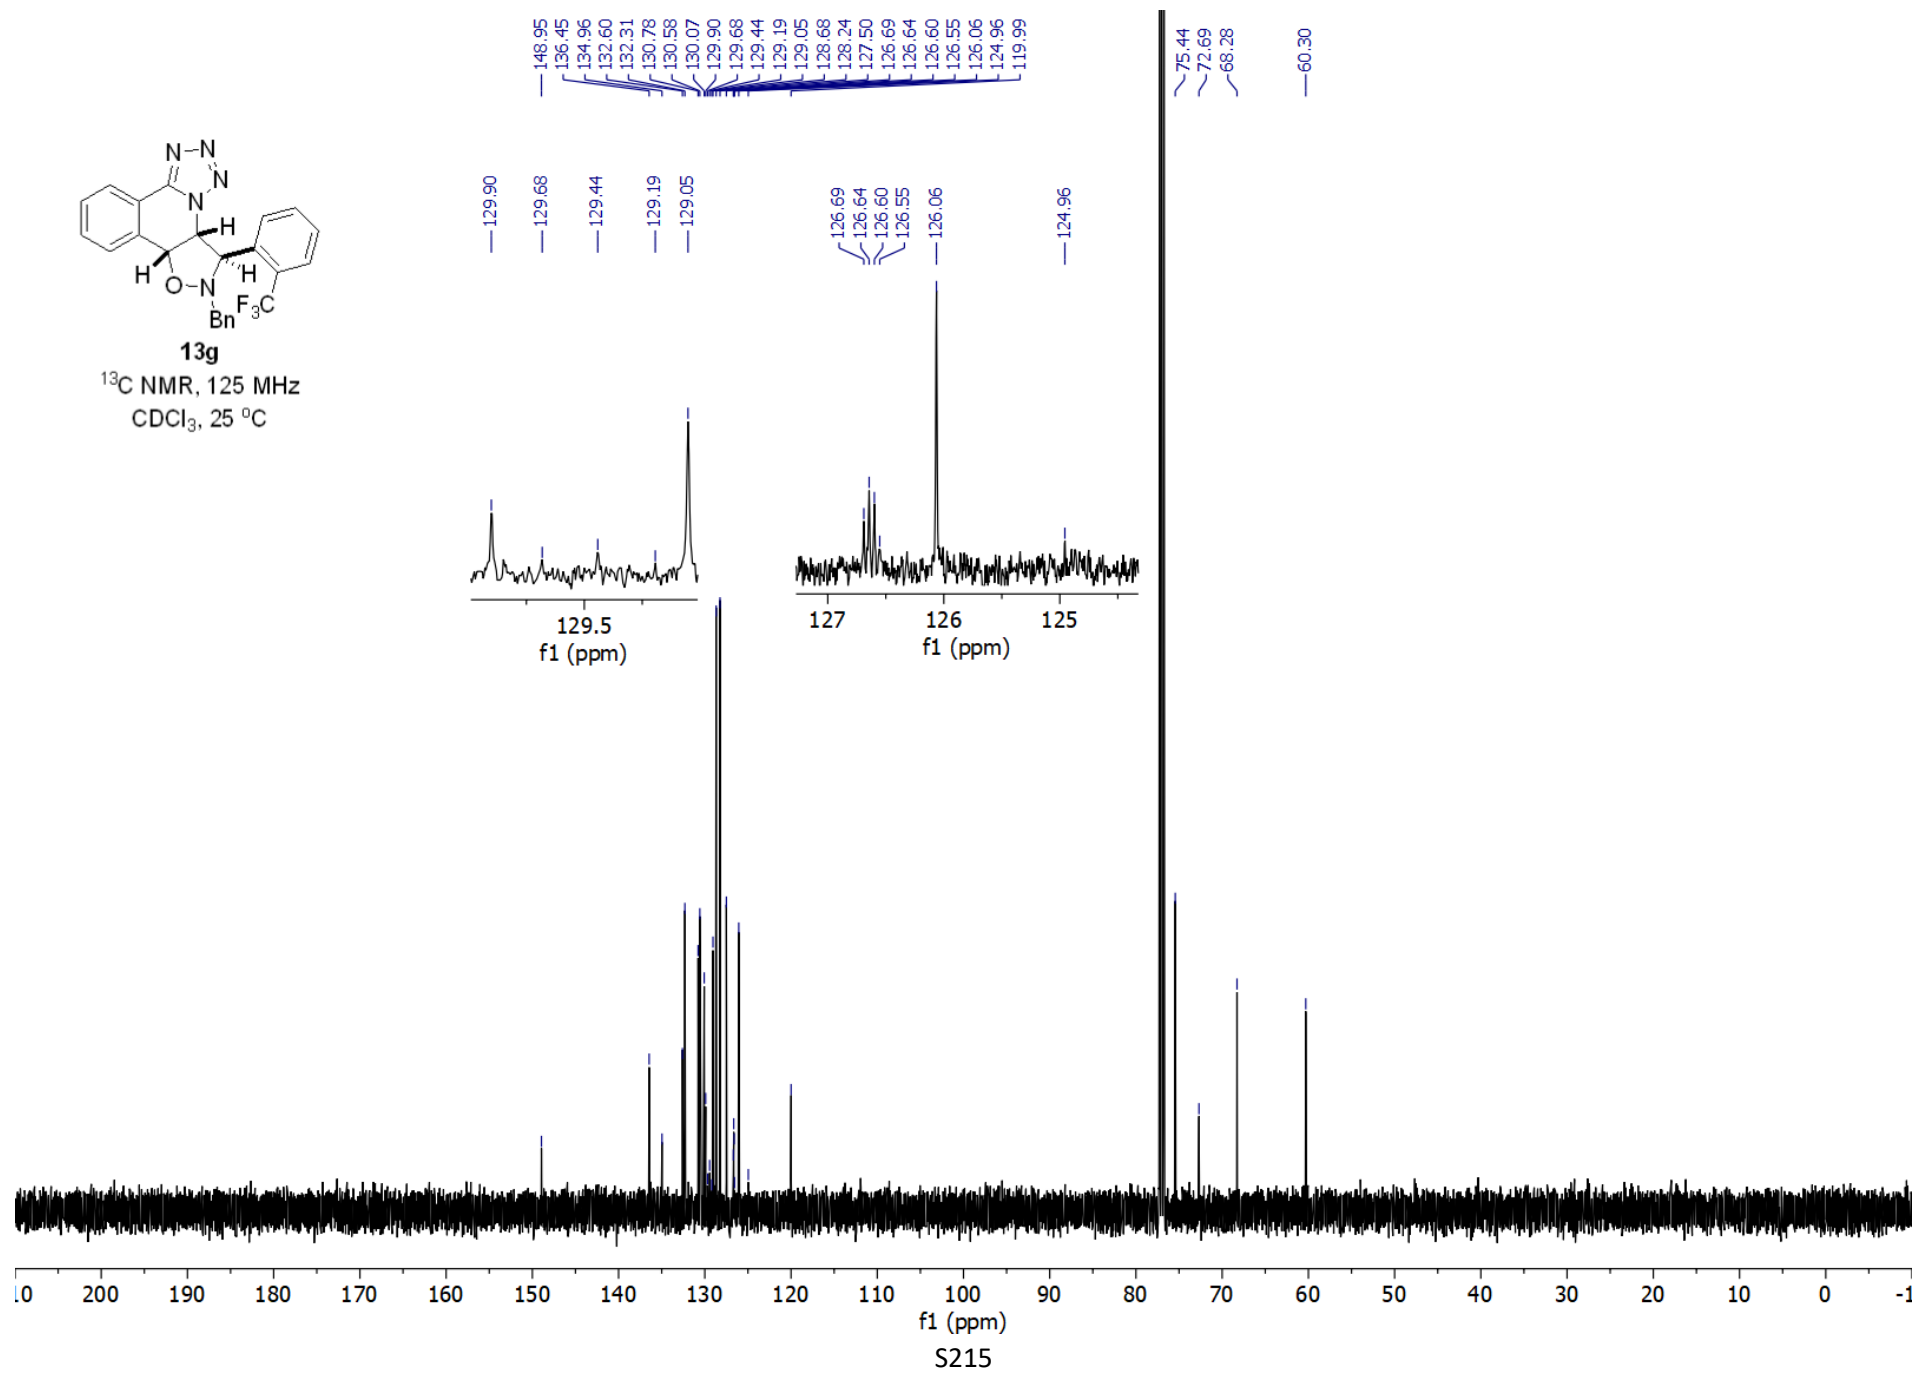

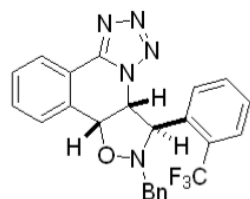

**13g**

$^{19}\text{F}$  NMR, 470 MHz

$\text{CDCl}_3$ , 25  $^\circ\text{C}$

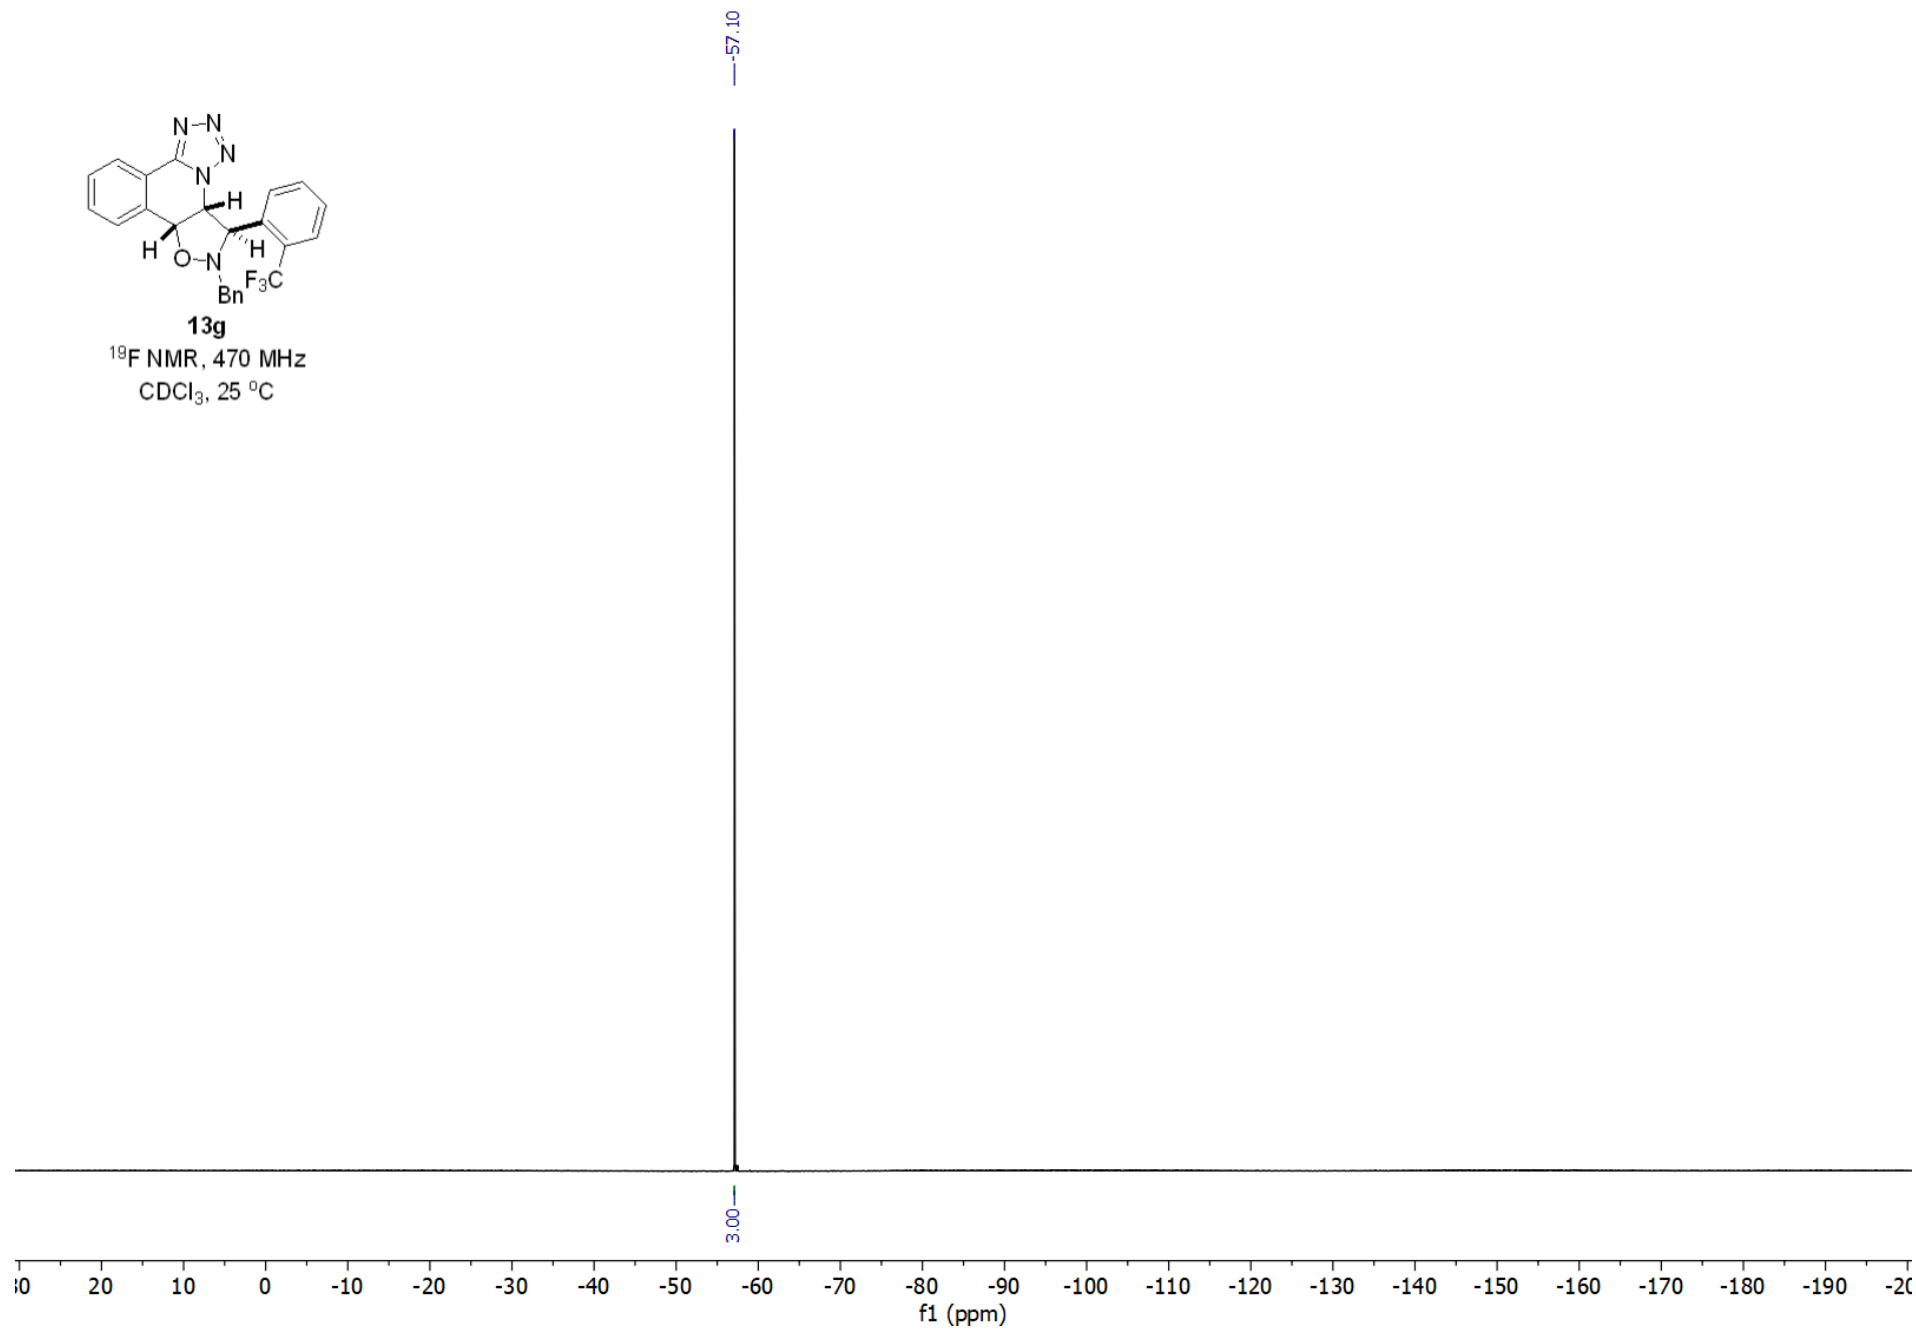

S216

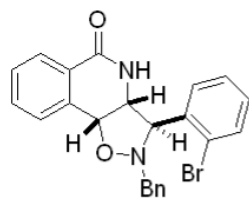

**12h**

$^1\text{H}$  NMR, 500 MHz  
DMSO- $d_6$ , 60  $^\circ\text{C}$

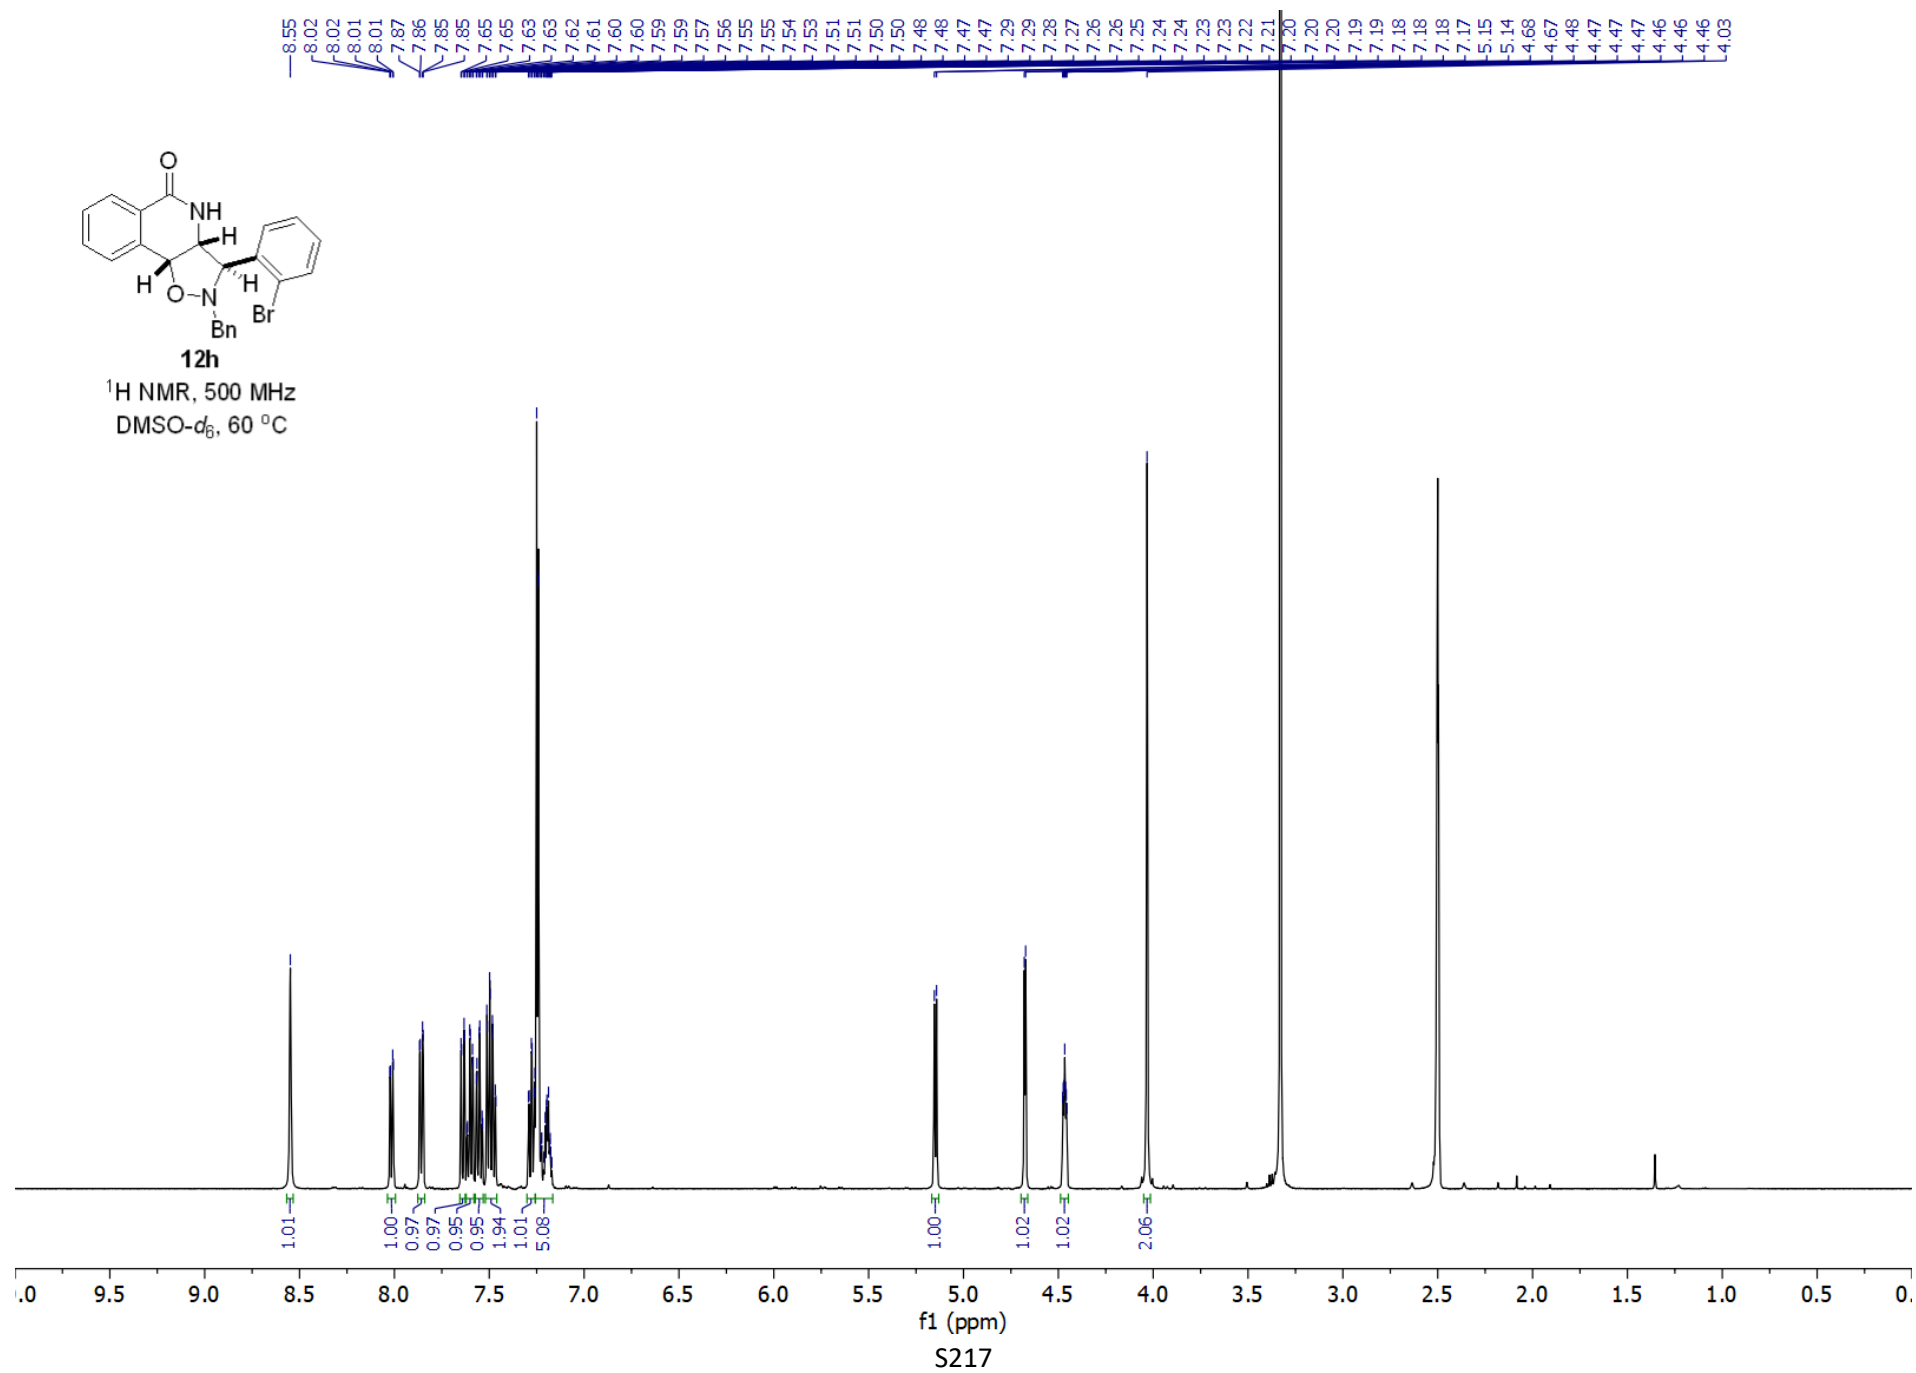

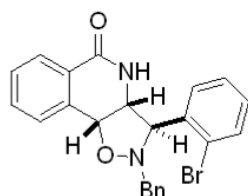

**12h**

$^{13}\text{C}$  NMR, 125 MHz

$\text{DMSO}-d_6$ , 60  $^{\circ}\text{C}$

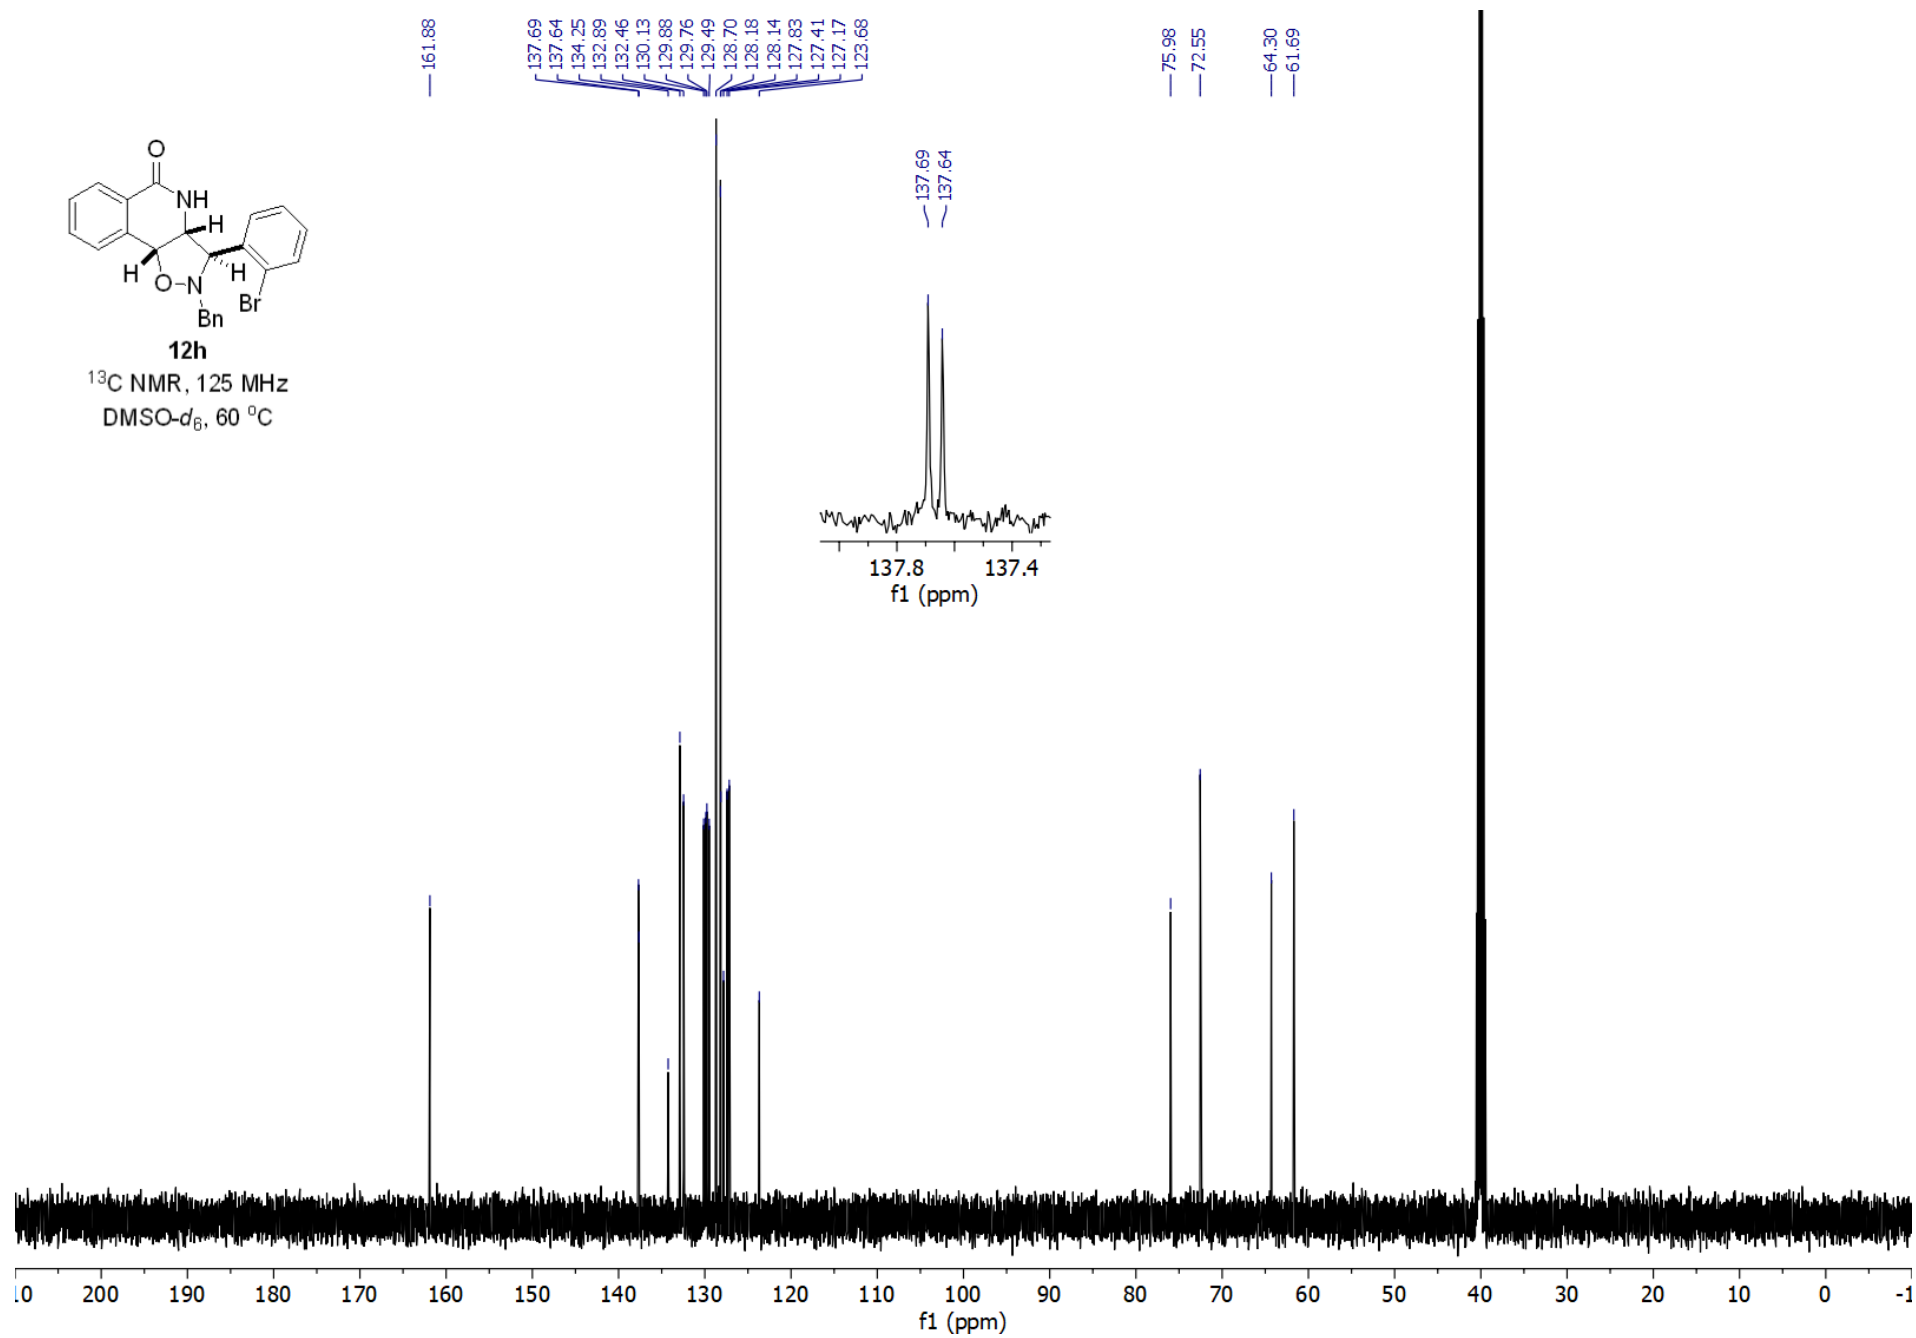

S218

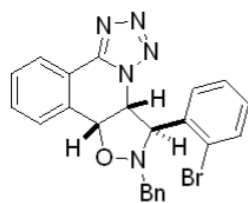

**13h**

$^1\text{H}$  NMR, 500 MHz  
 $\text{CDCl}_3$ , 25  $^\circ\text{C}$

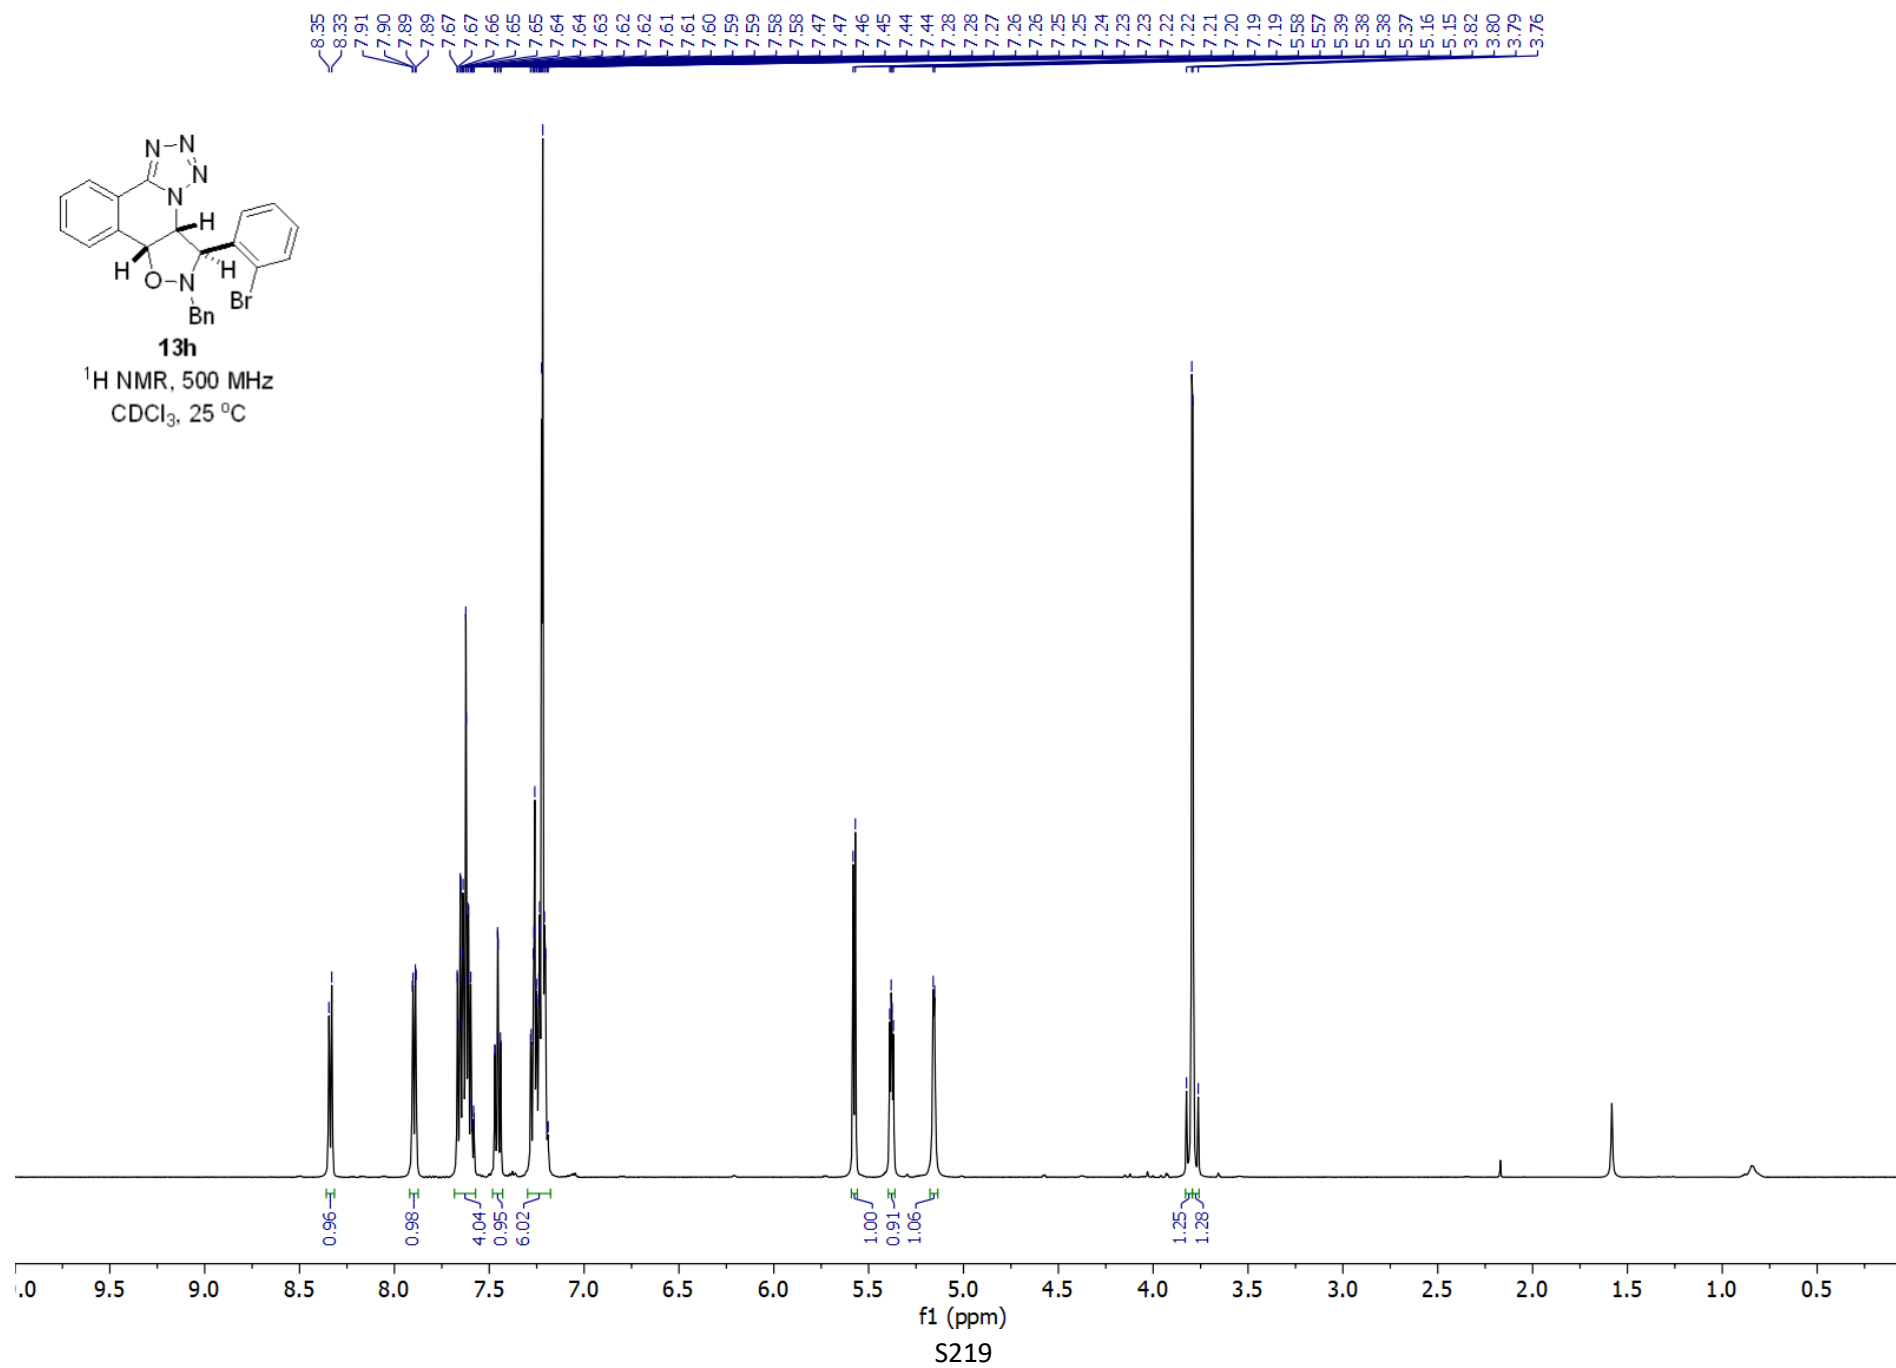

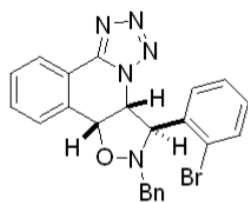

**13h**

$^{13}\text{C}$  NMR, 125 MHz  
 $\text{CDCl}_3$ , 25  $^\circ\text{C}$

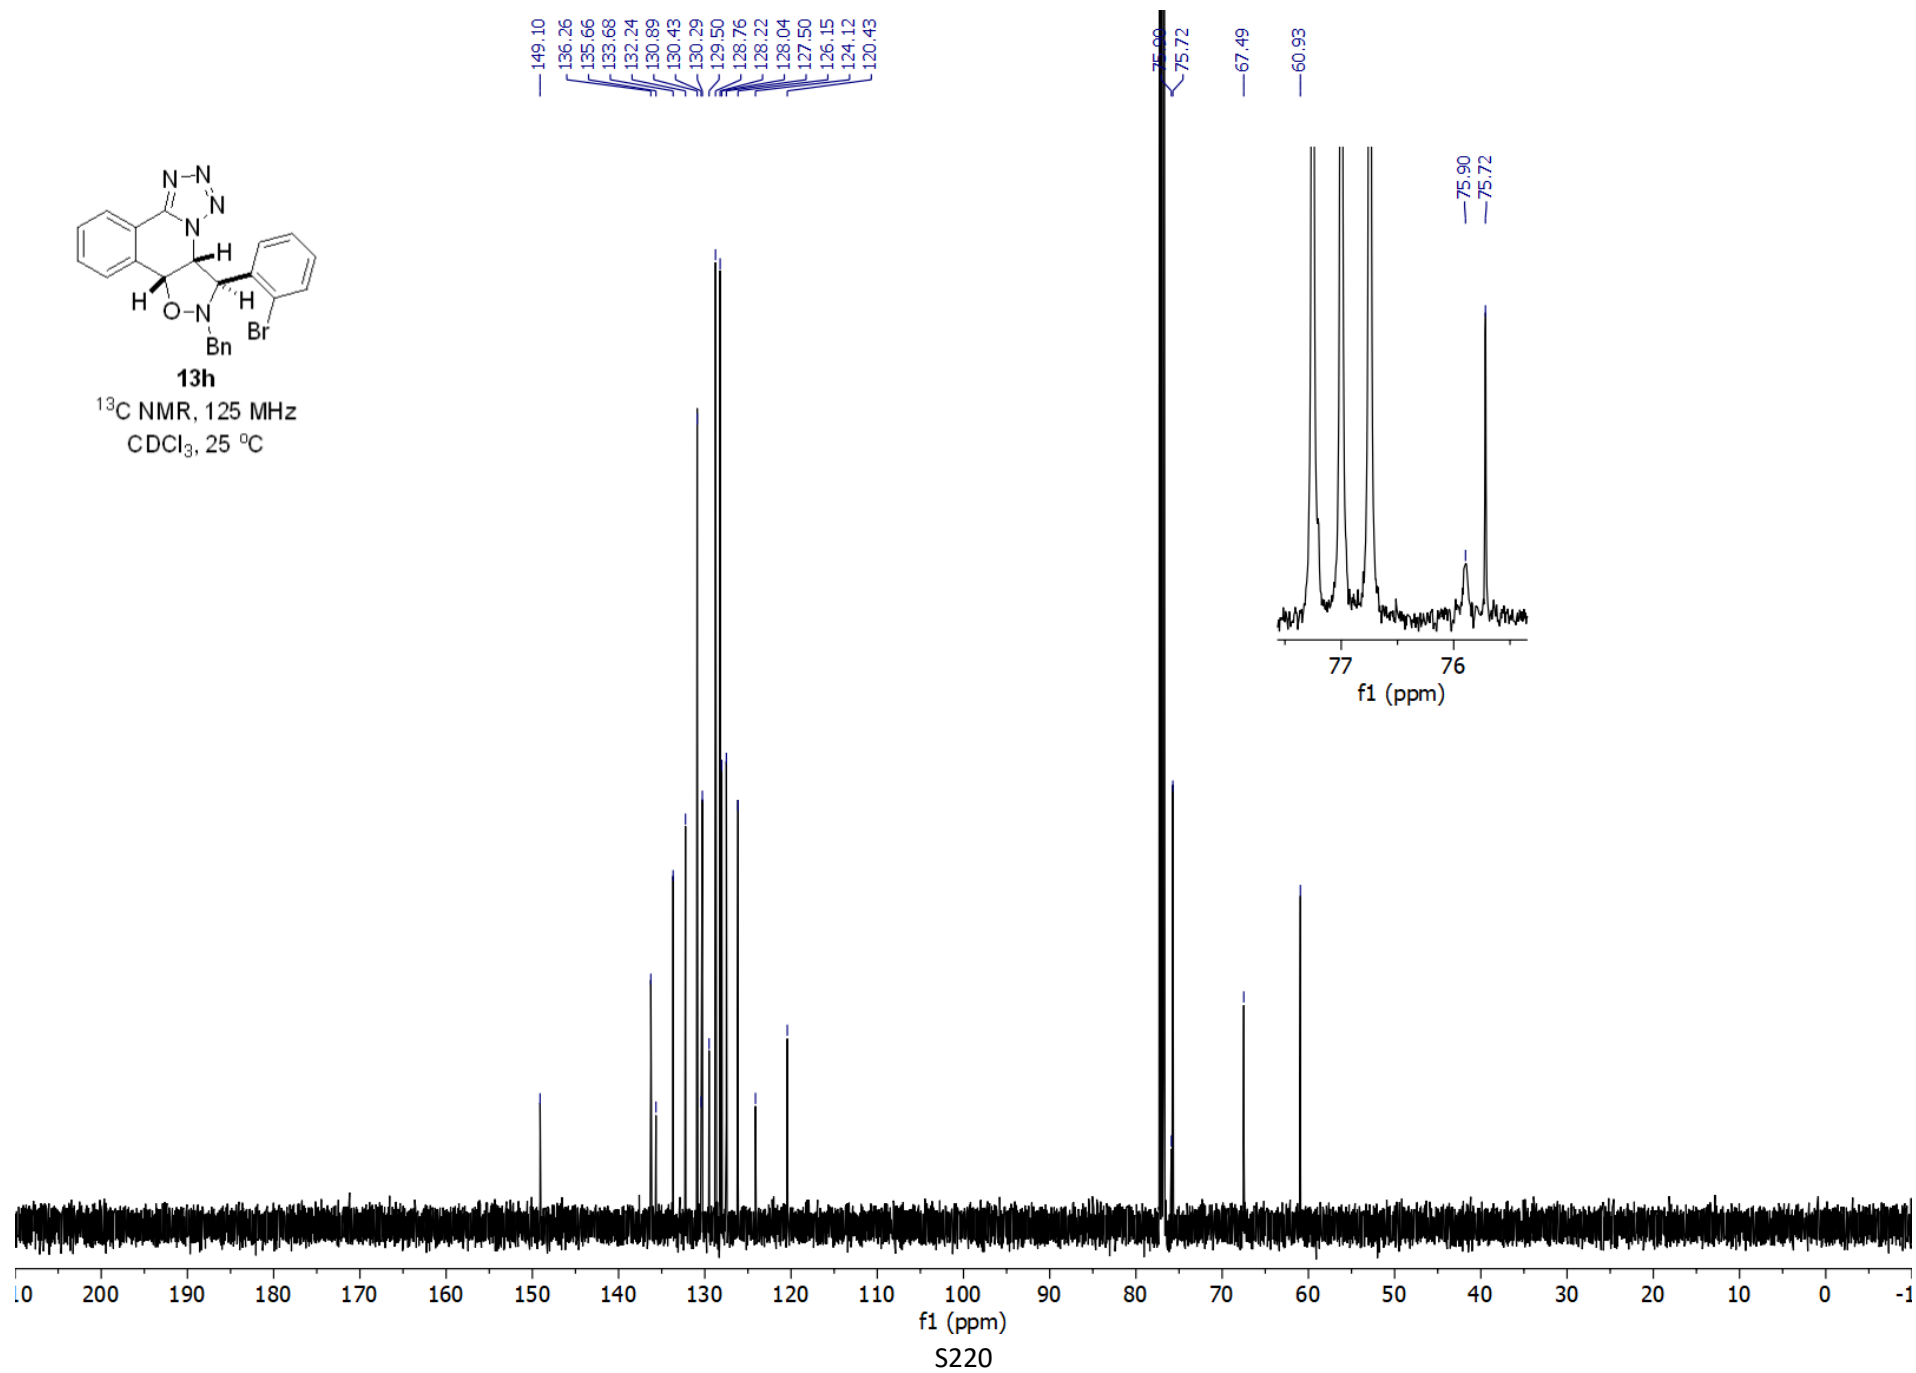

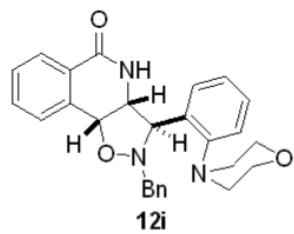

$^1\text{H}$  NMR, 500 MHz  
DMSO- $d_6$ , 60  $^\circ\text{C}$

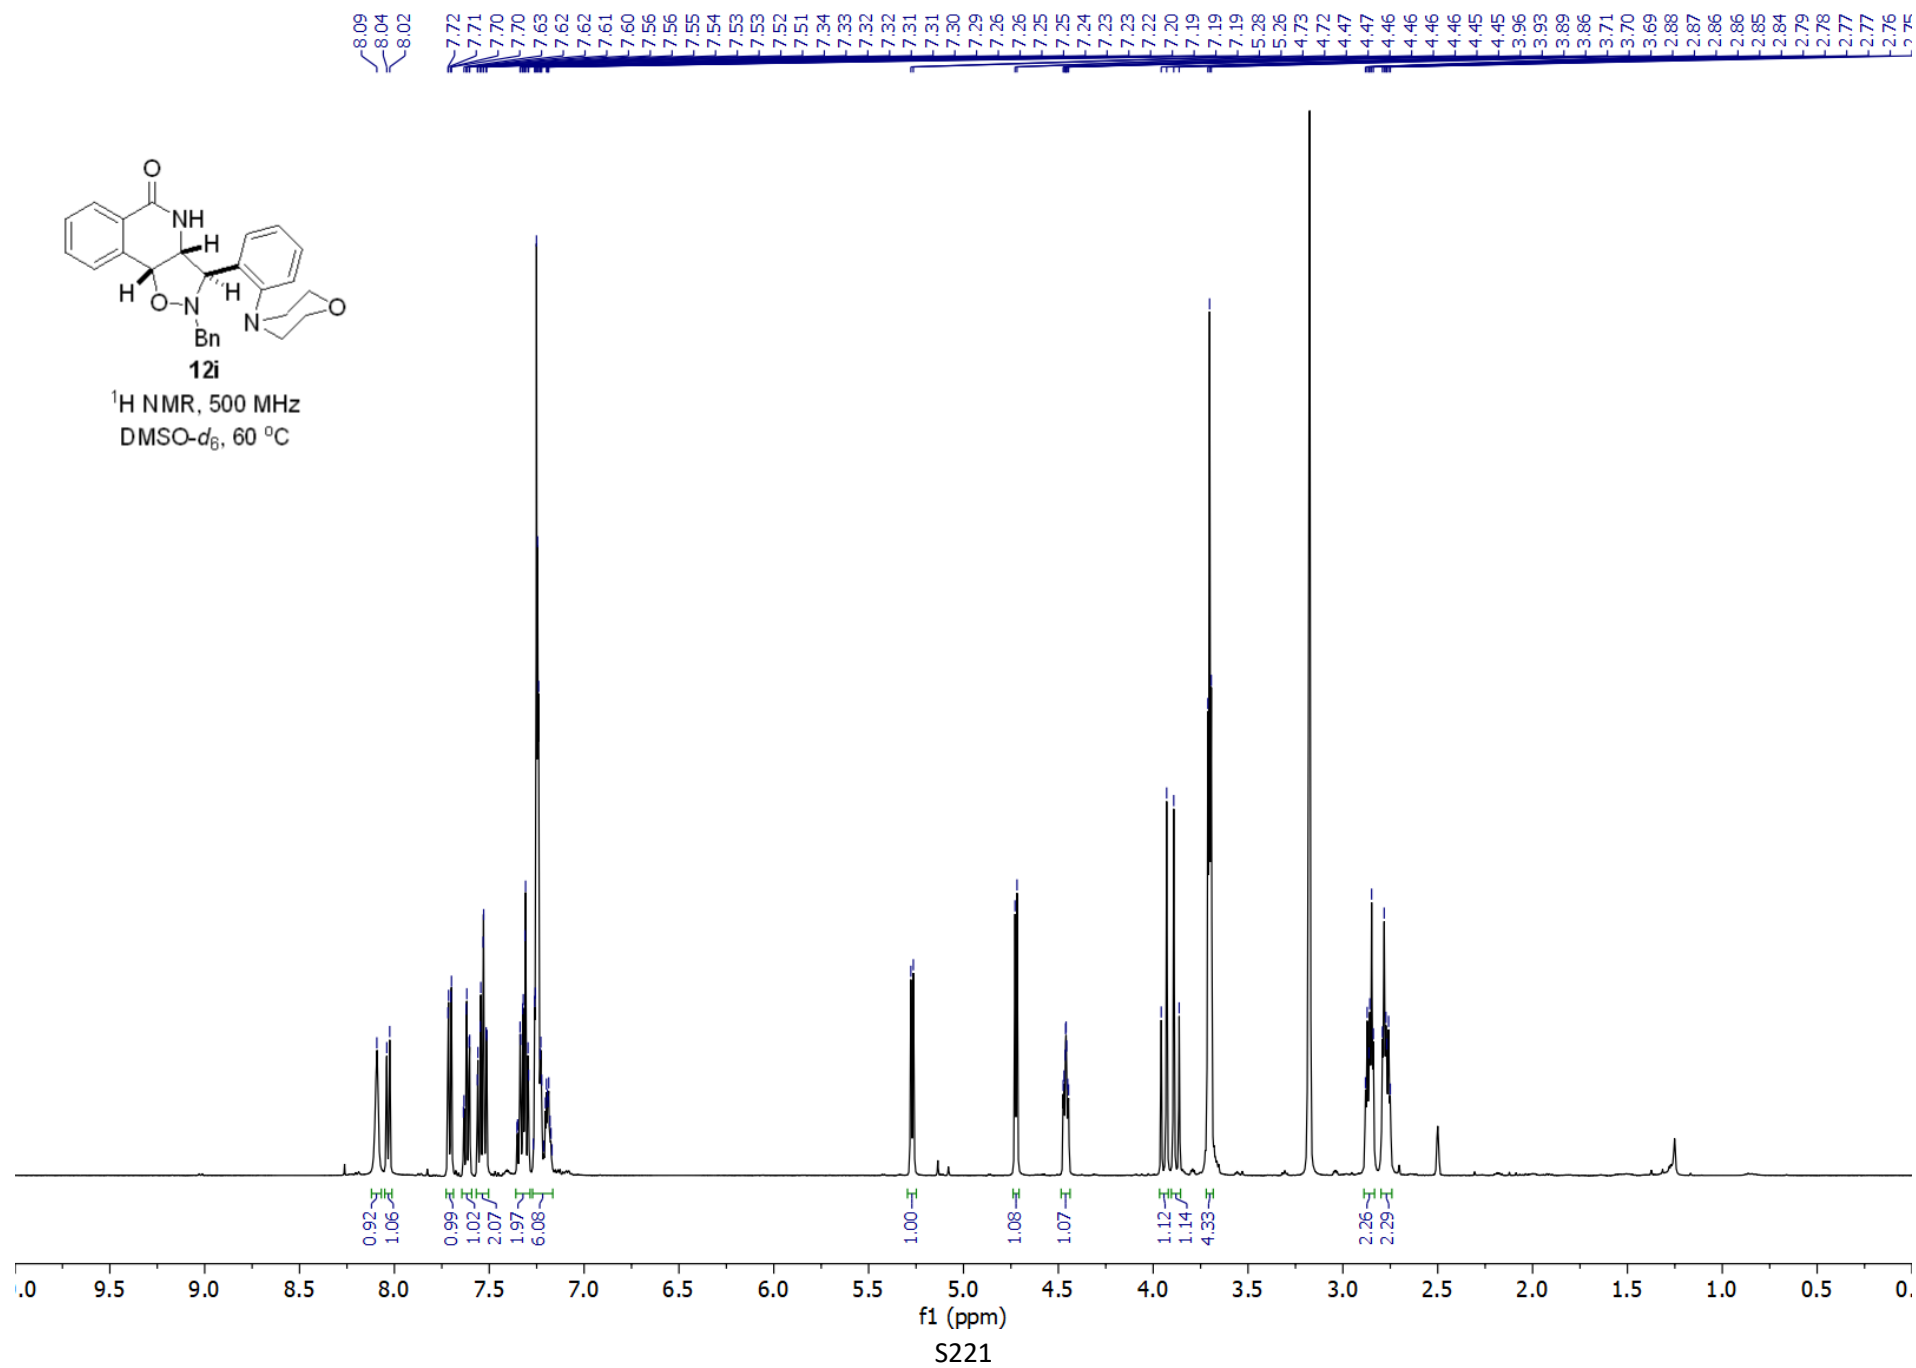

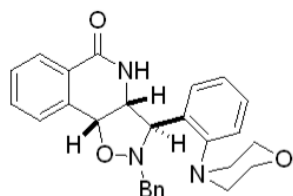

**12i**

$^{13}\text{C}$  NMR, 125 MHz  
DMSO- $d_6$ , 60  $^\circ\text{C}$

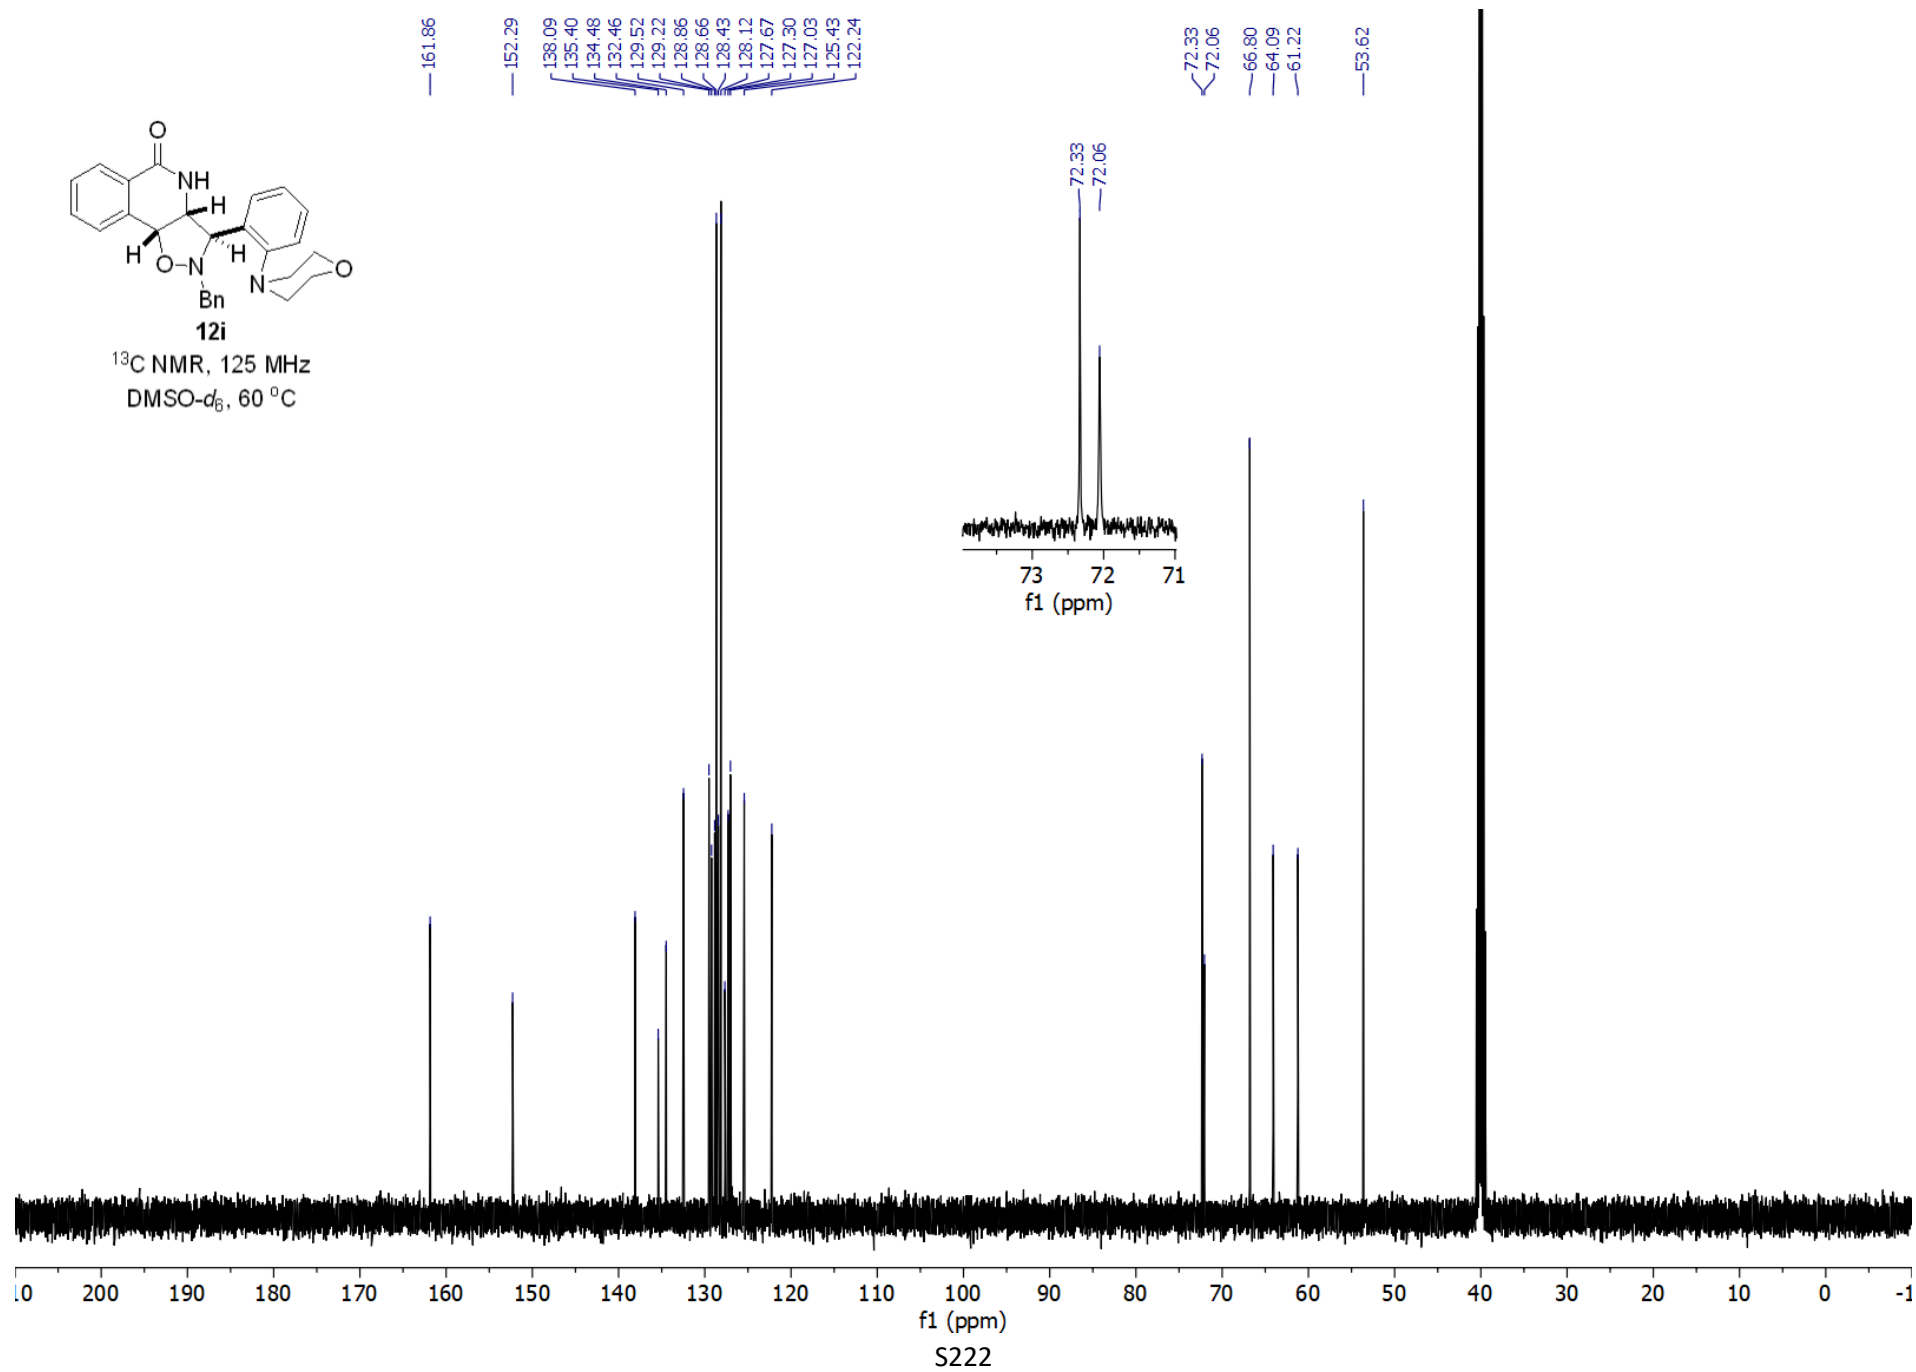

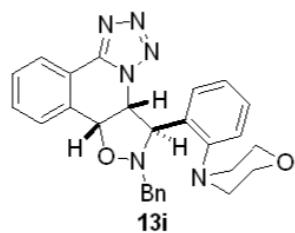

$^1\text{H}$  NMR, 500 MHz  
 $\text{CDCl}_3$ , 25  $^\circ\text{C}$

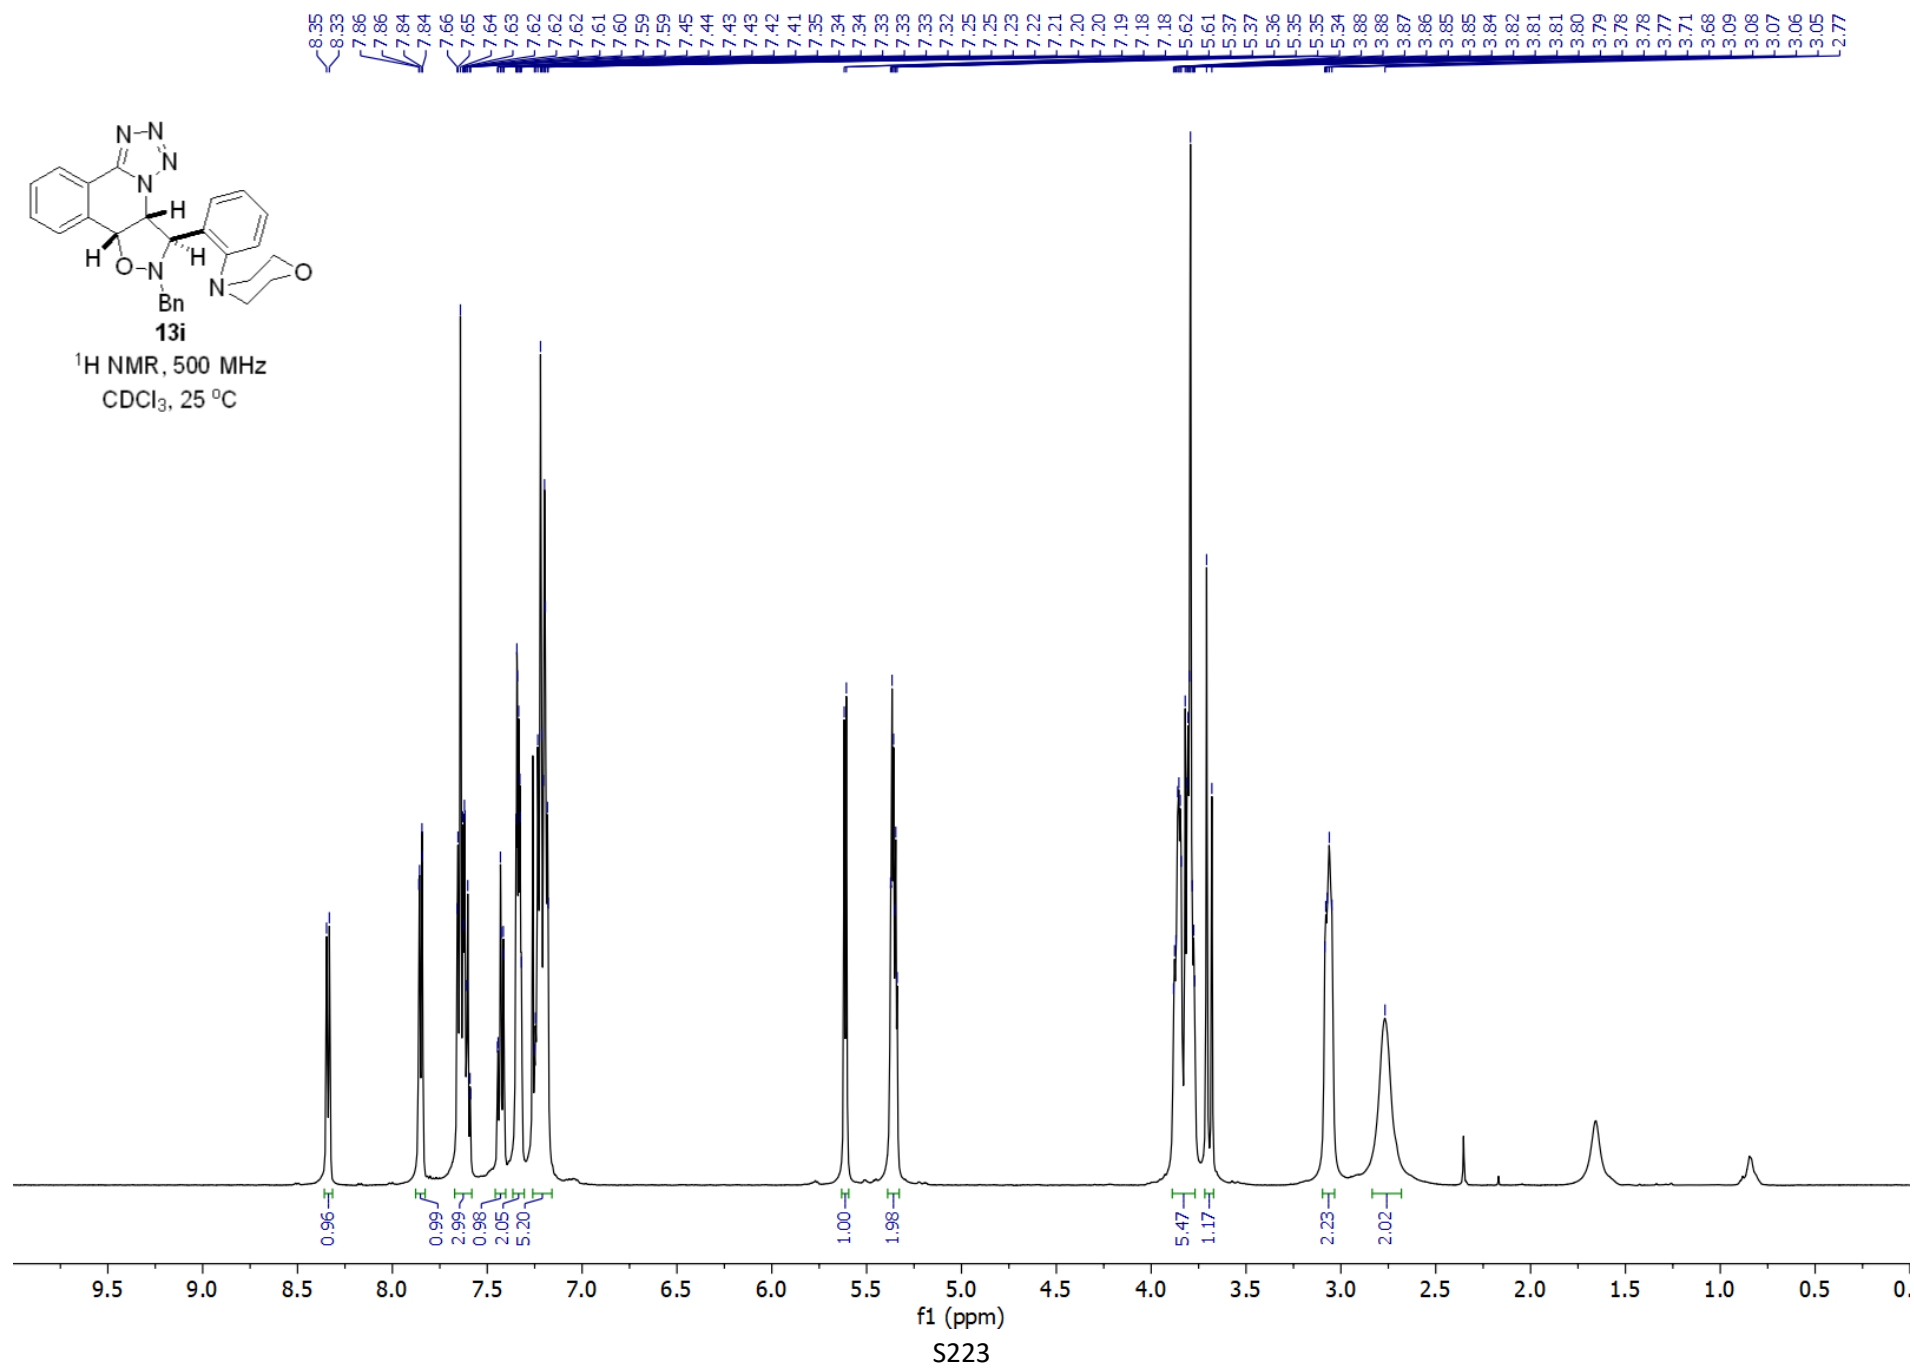

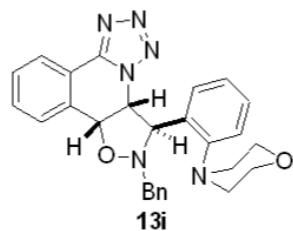

$^{13}\text{C}$  NMR, 125 MHz  
 $\text{CDCl}_3$ , 25  $^\circ\text{C}$

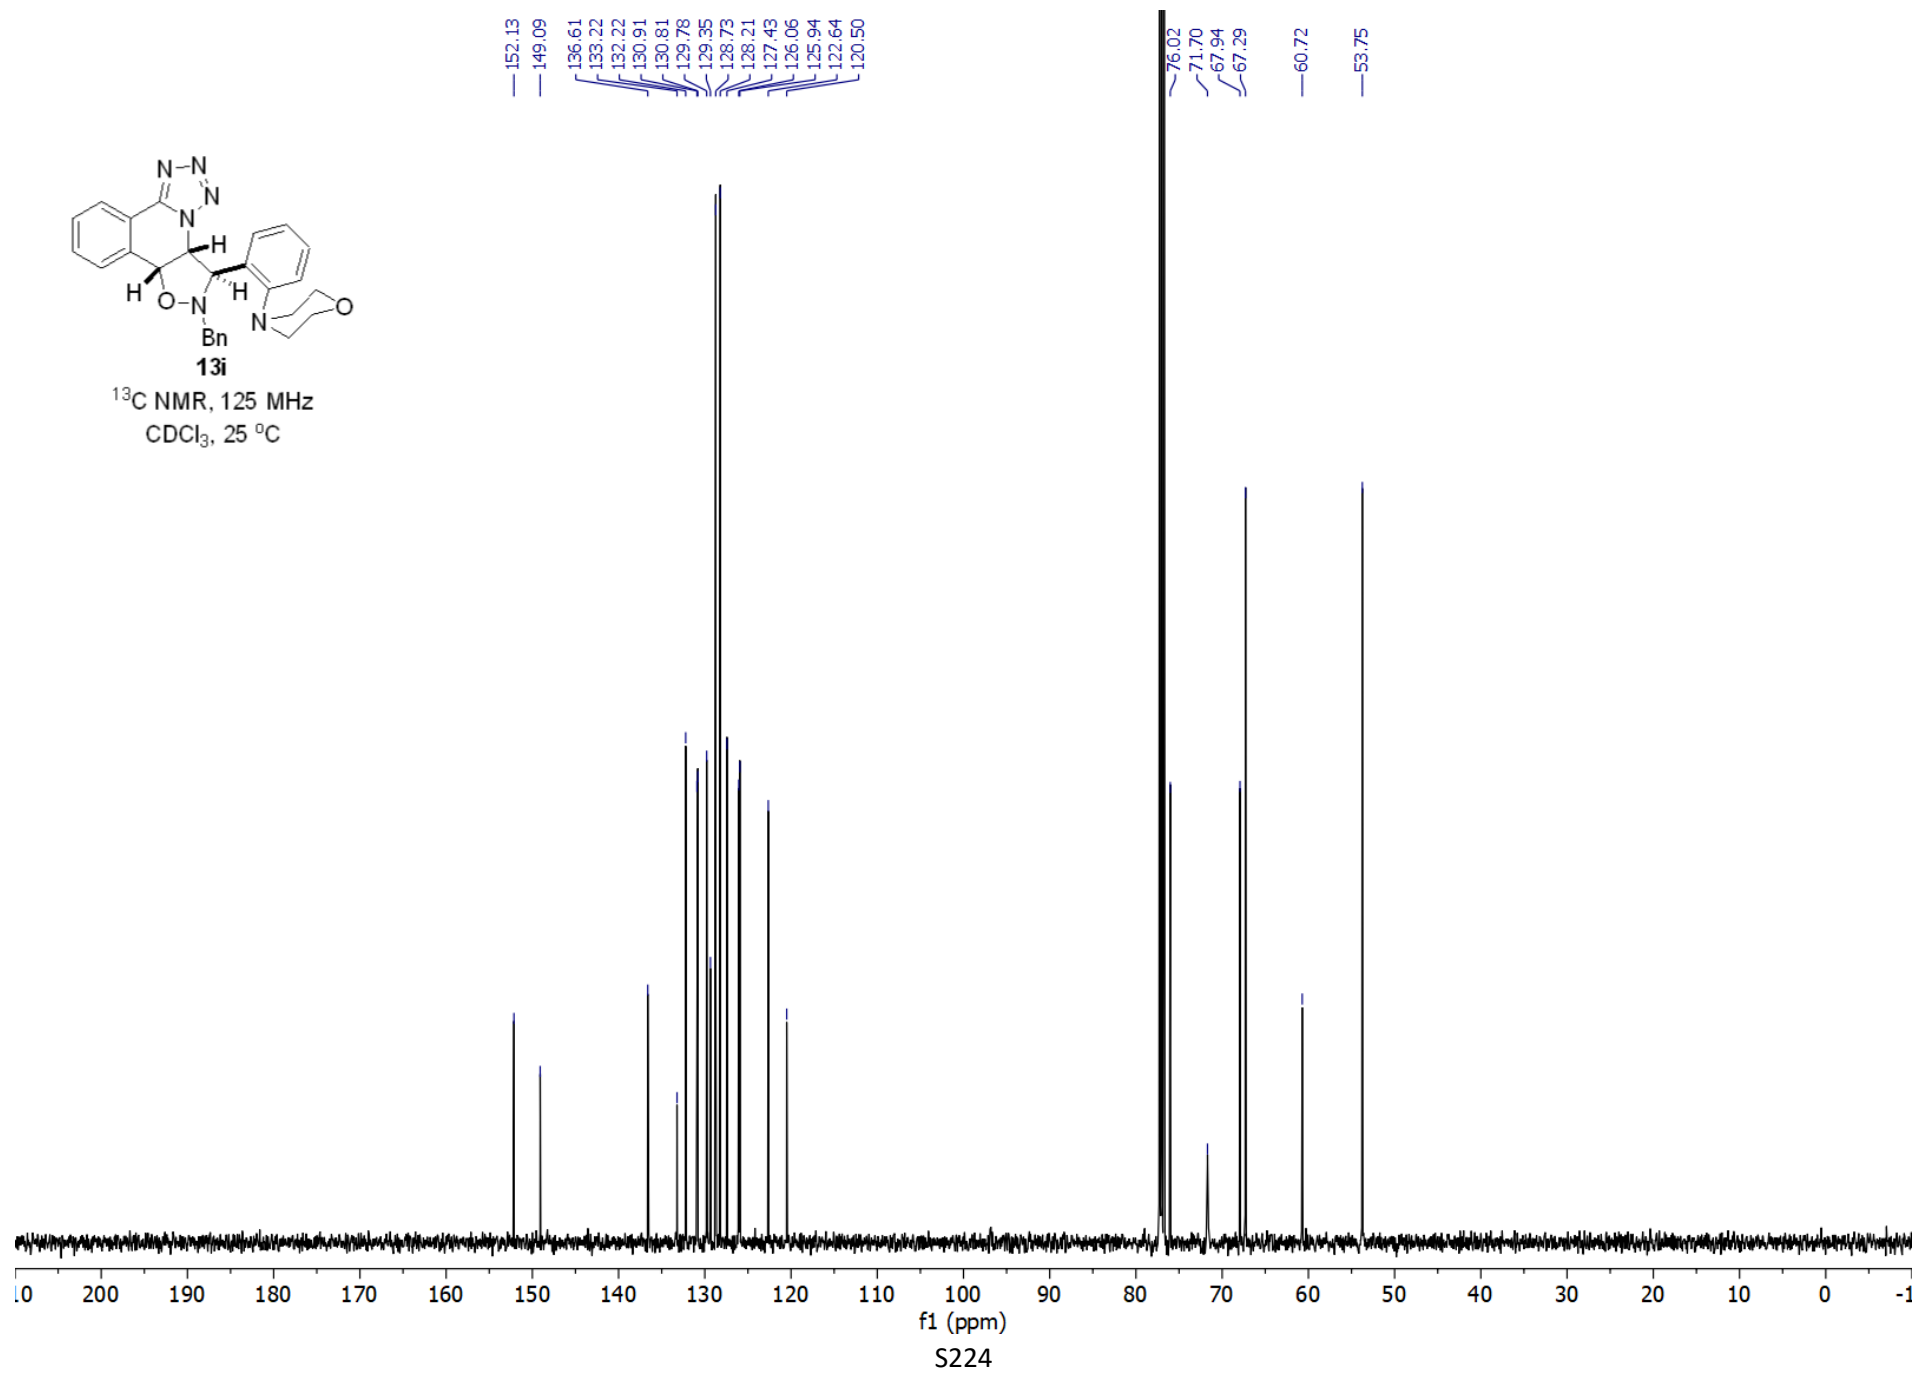

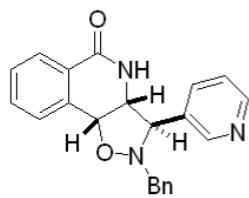

**12j**

$^1\text{H}$  NMR, 500 MHz  
DMSO- $d_6$ , 60  $^\circ\text{C}$

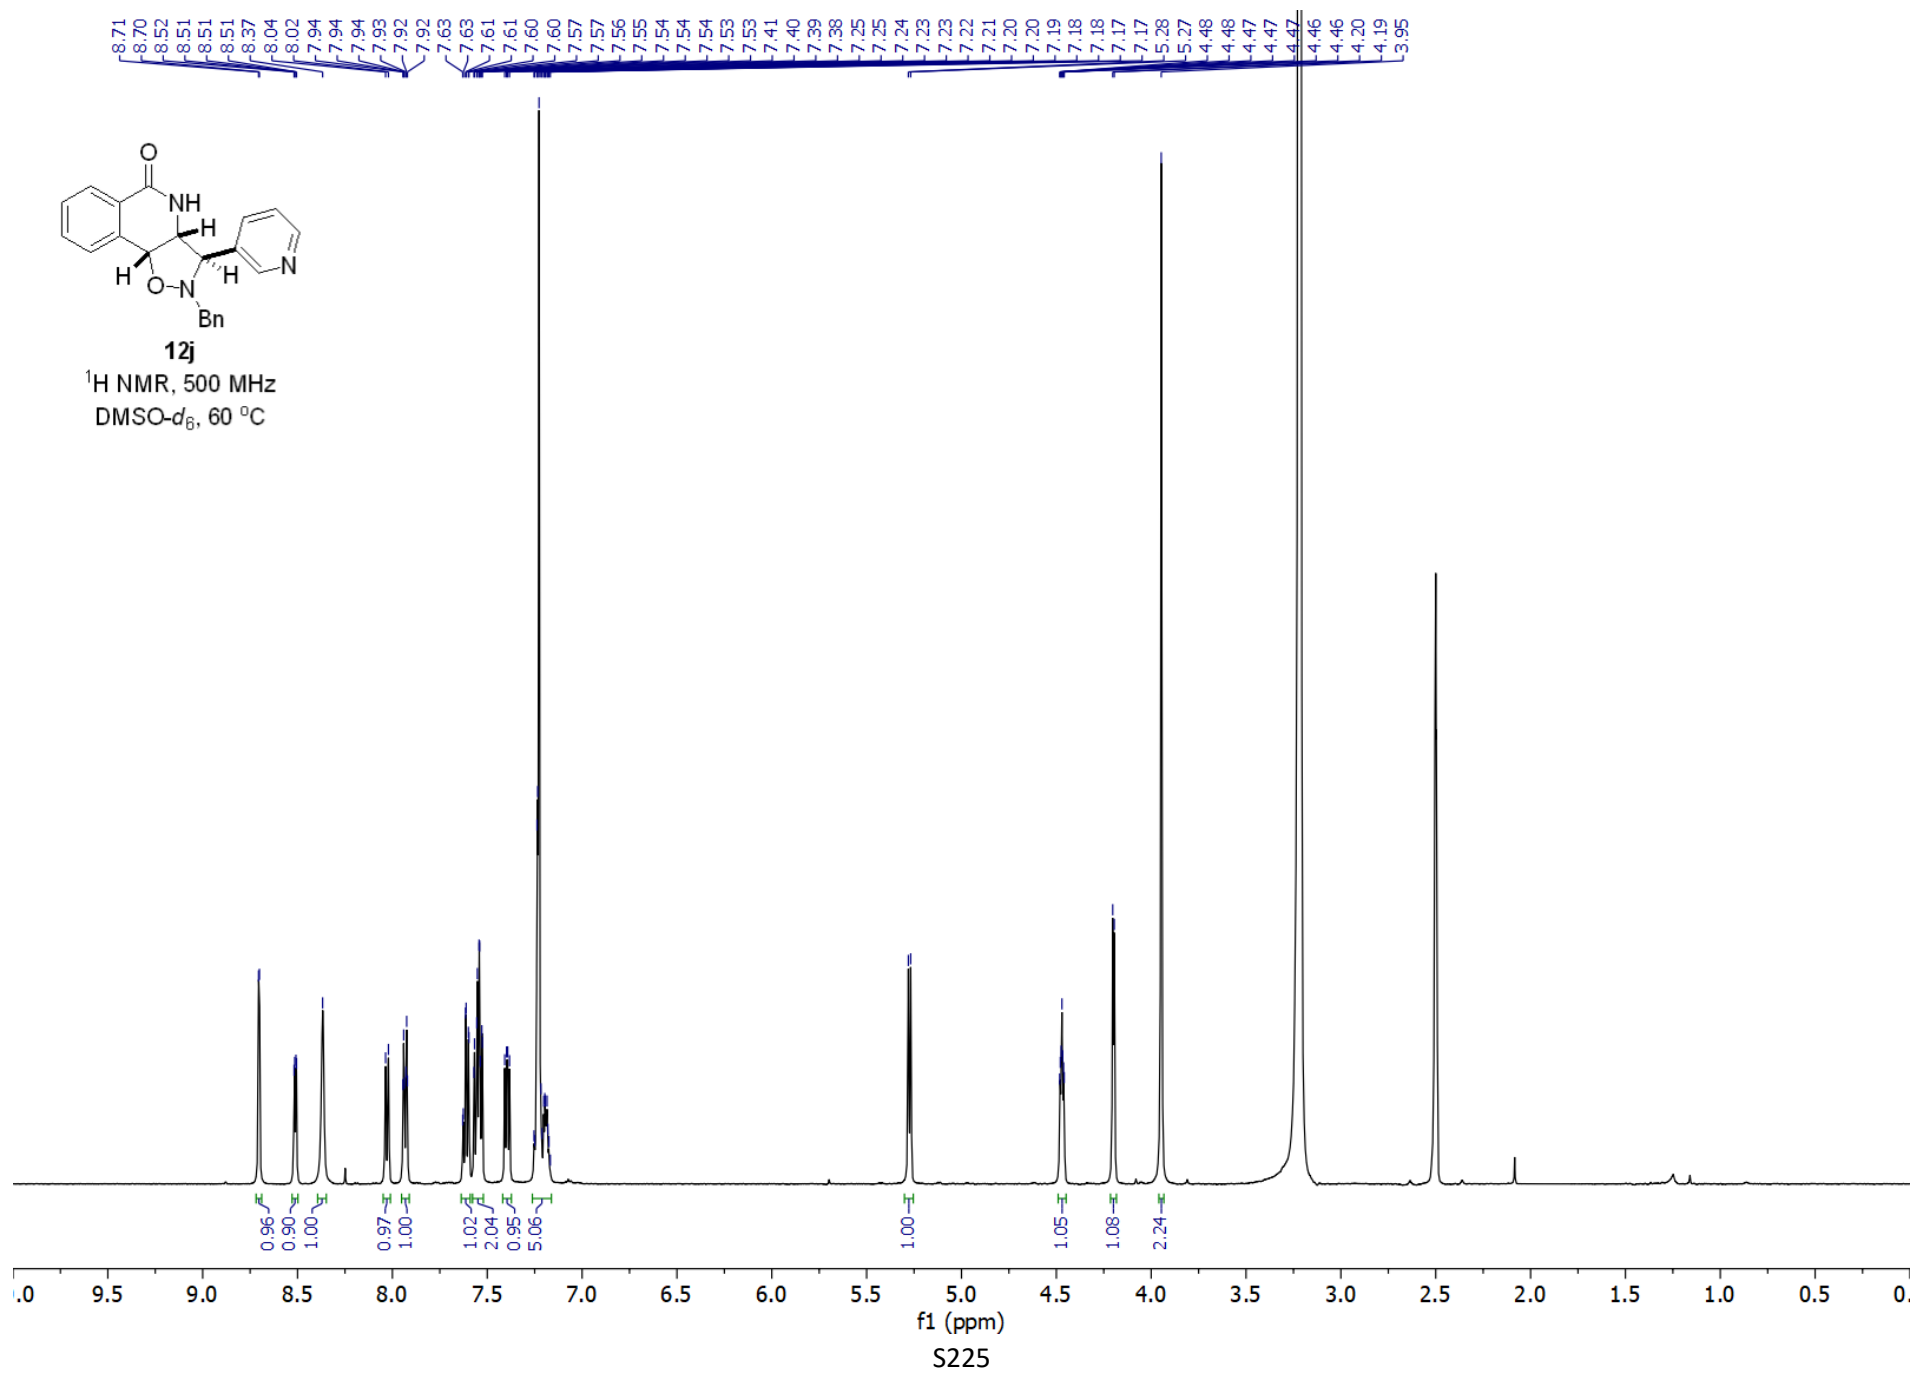

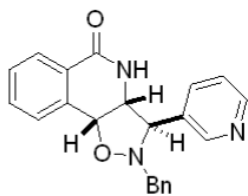

**12j**

$^{13}\text{C}$  NMR, 125 MHz

$\text{DMSO}-d_6$ , 60  $^{\circ}\text{C}$

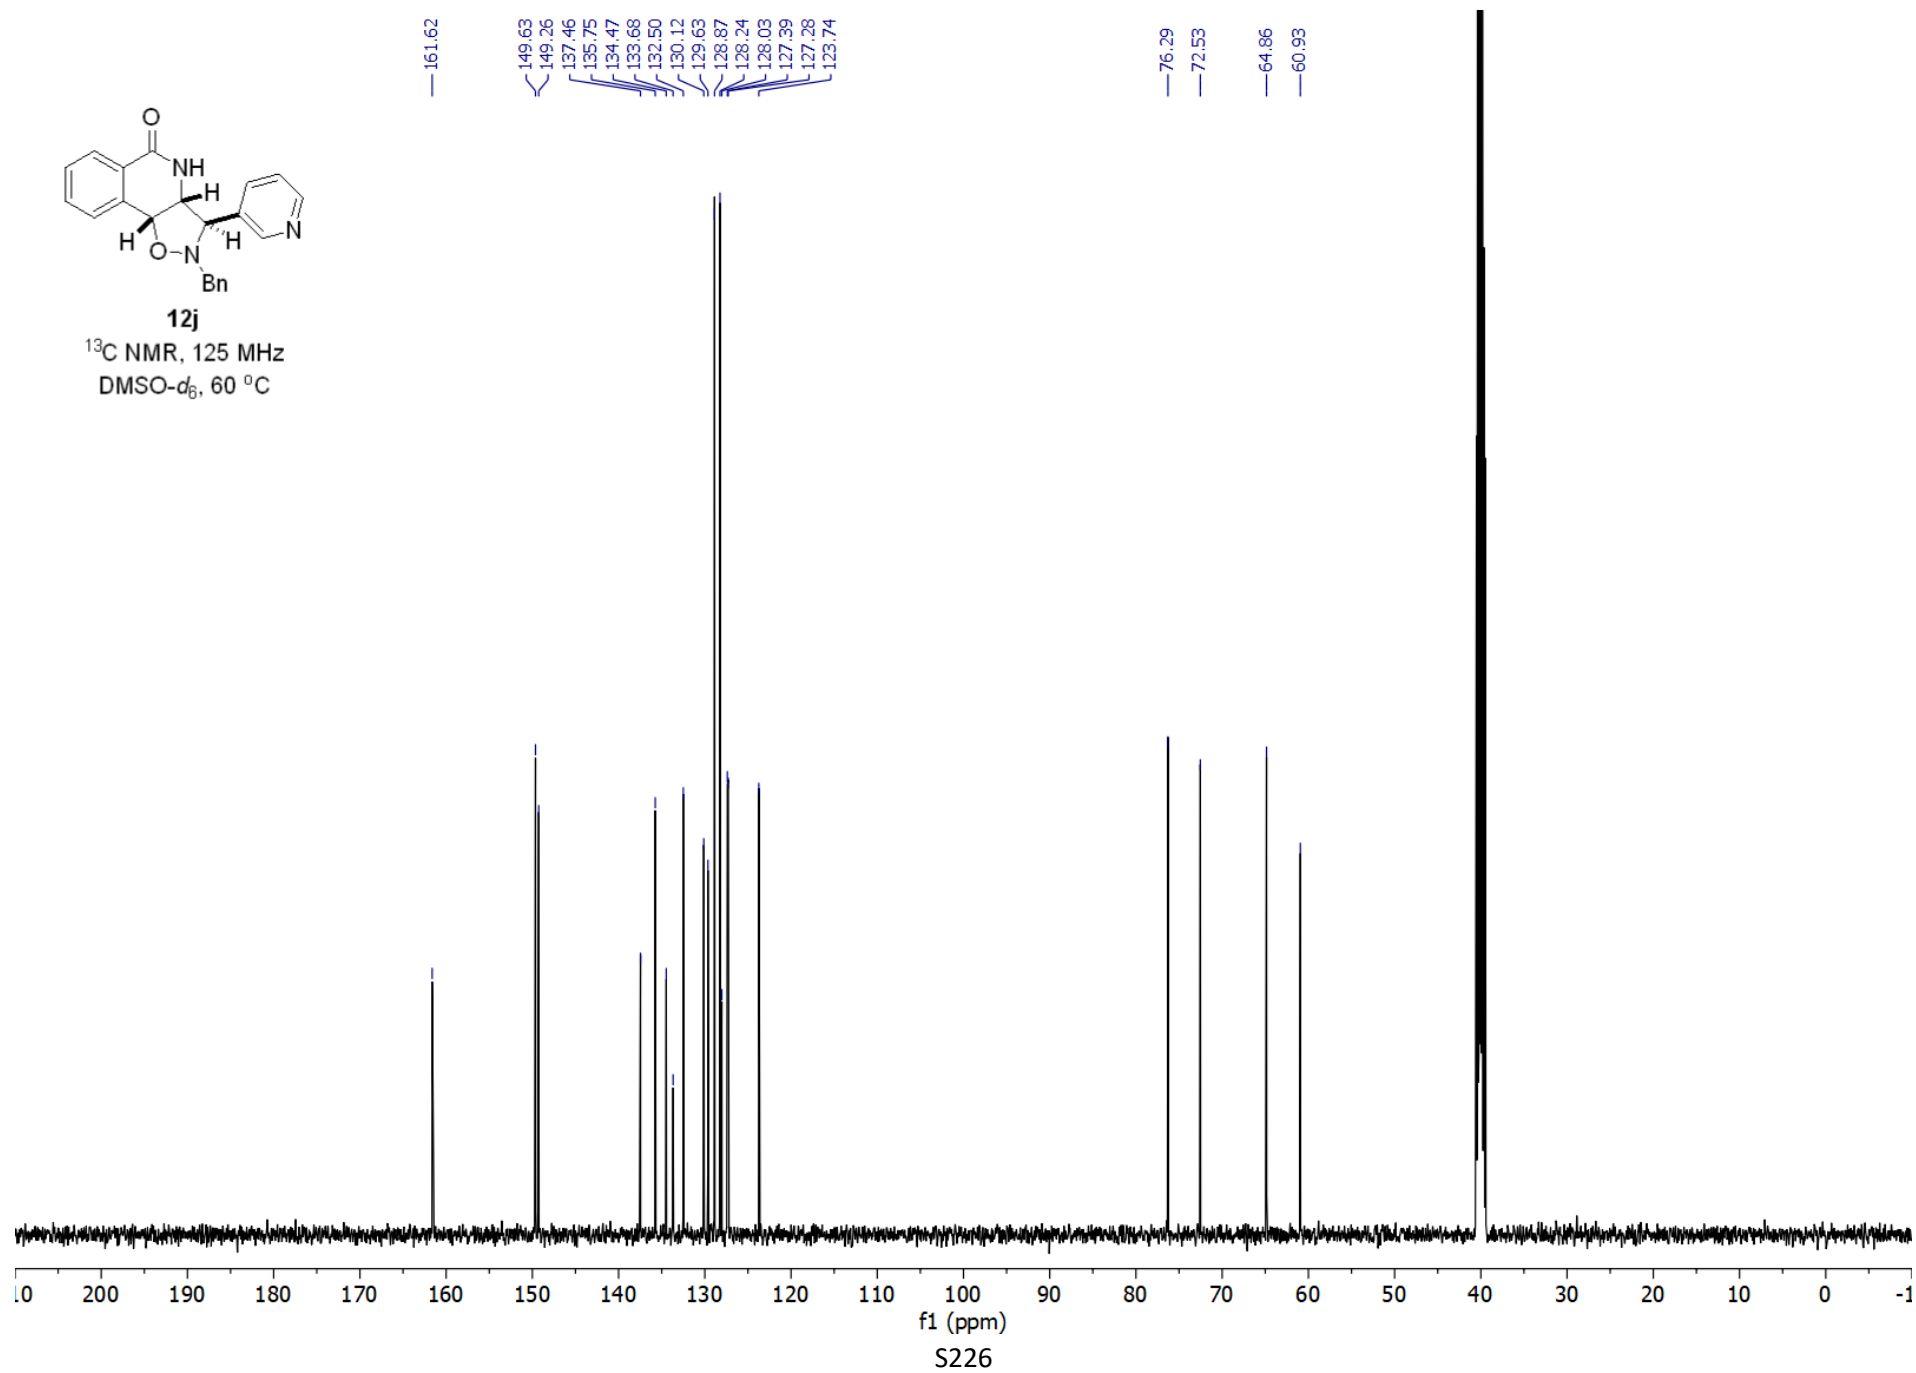

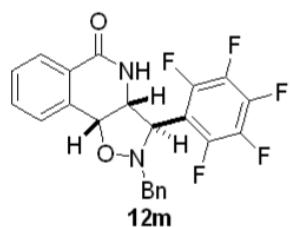

$^1\text{H}$  NMR, 500 MHz  
DMSO- $d_6$ , 60 °C

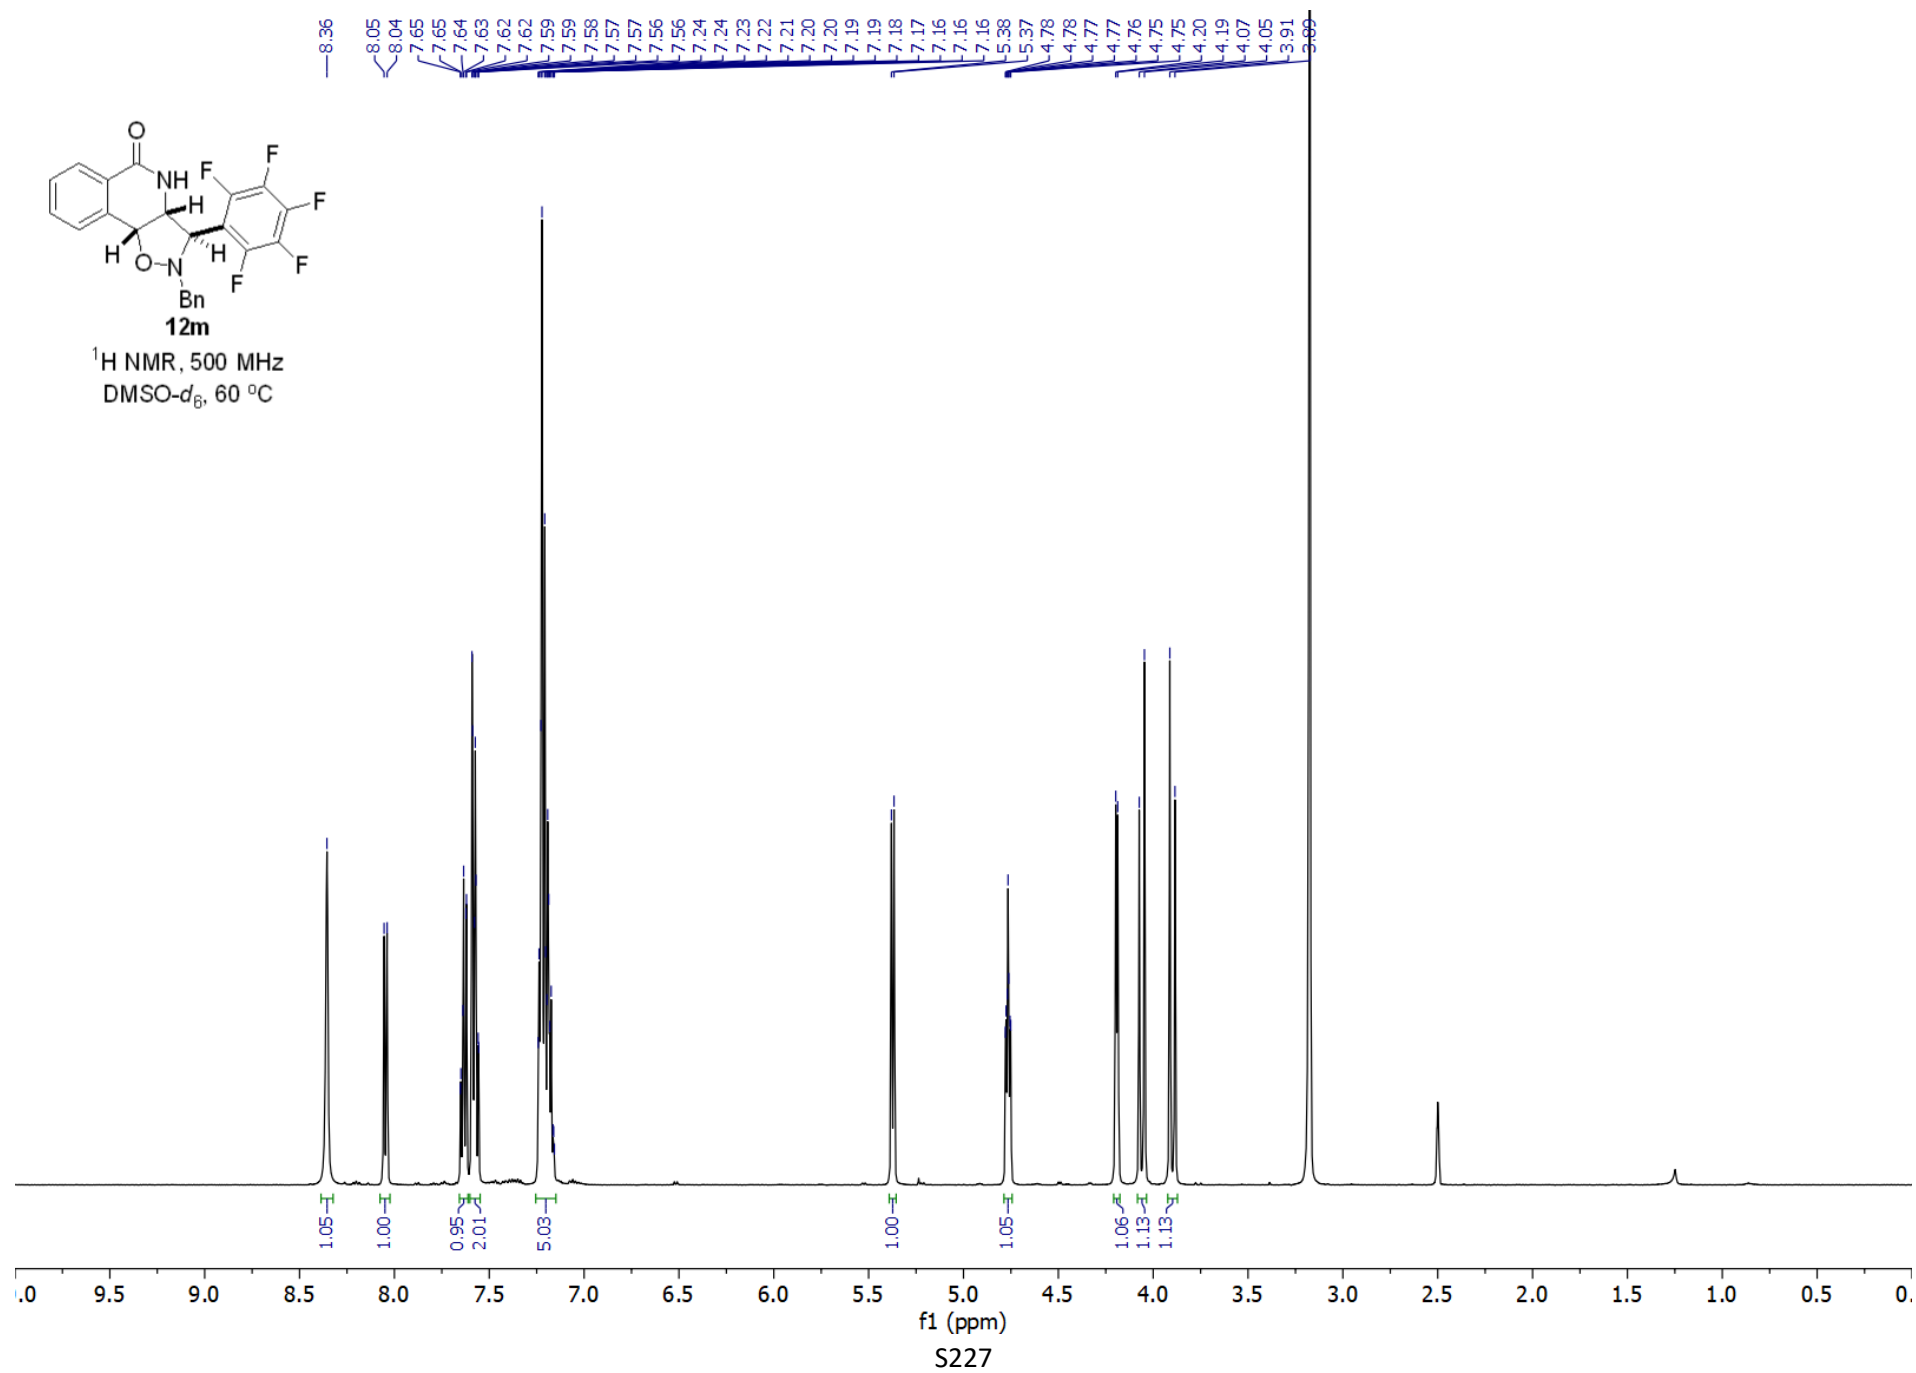

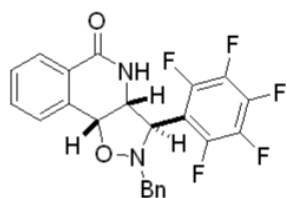

**12m**

$^{13}\text{C}$  NMR, 125 MHz  
DMSO- $d_6$ , 60 °C

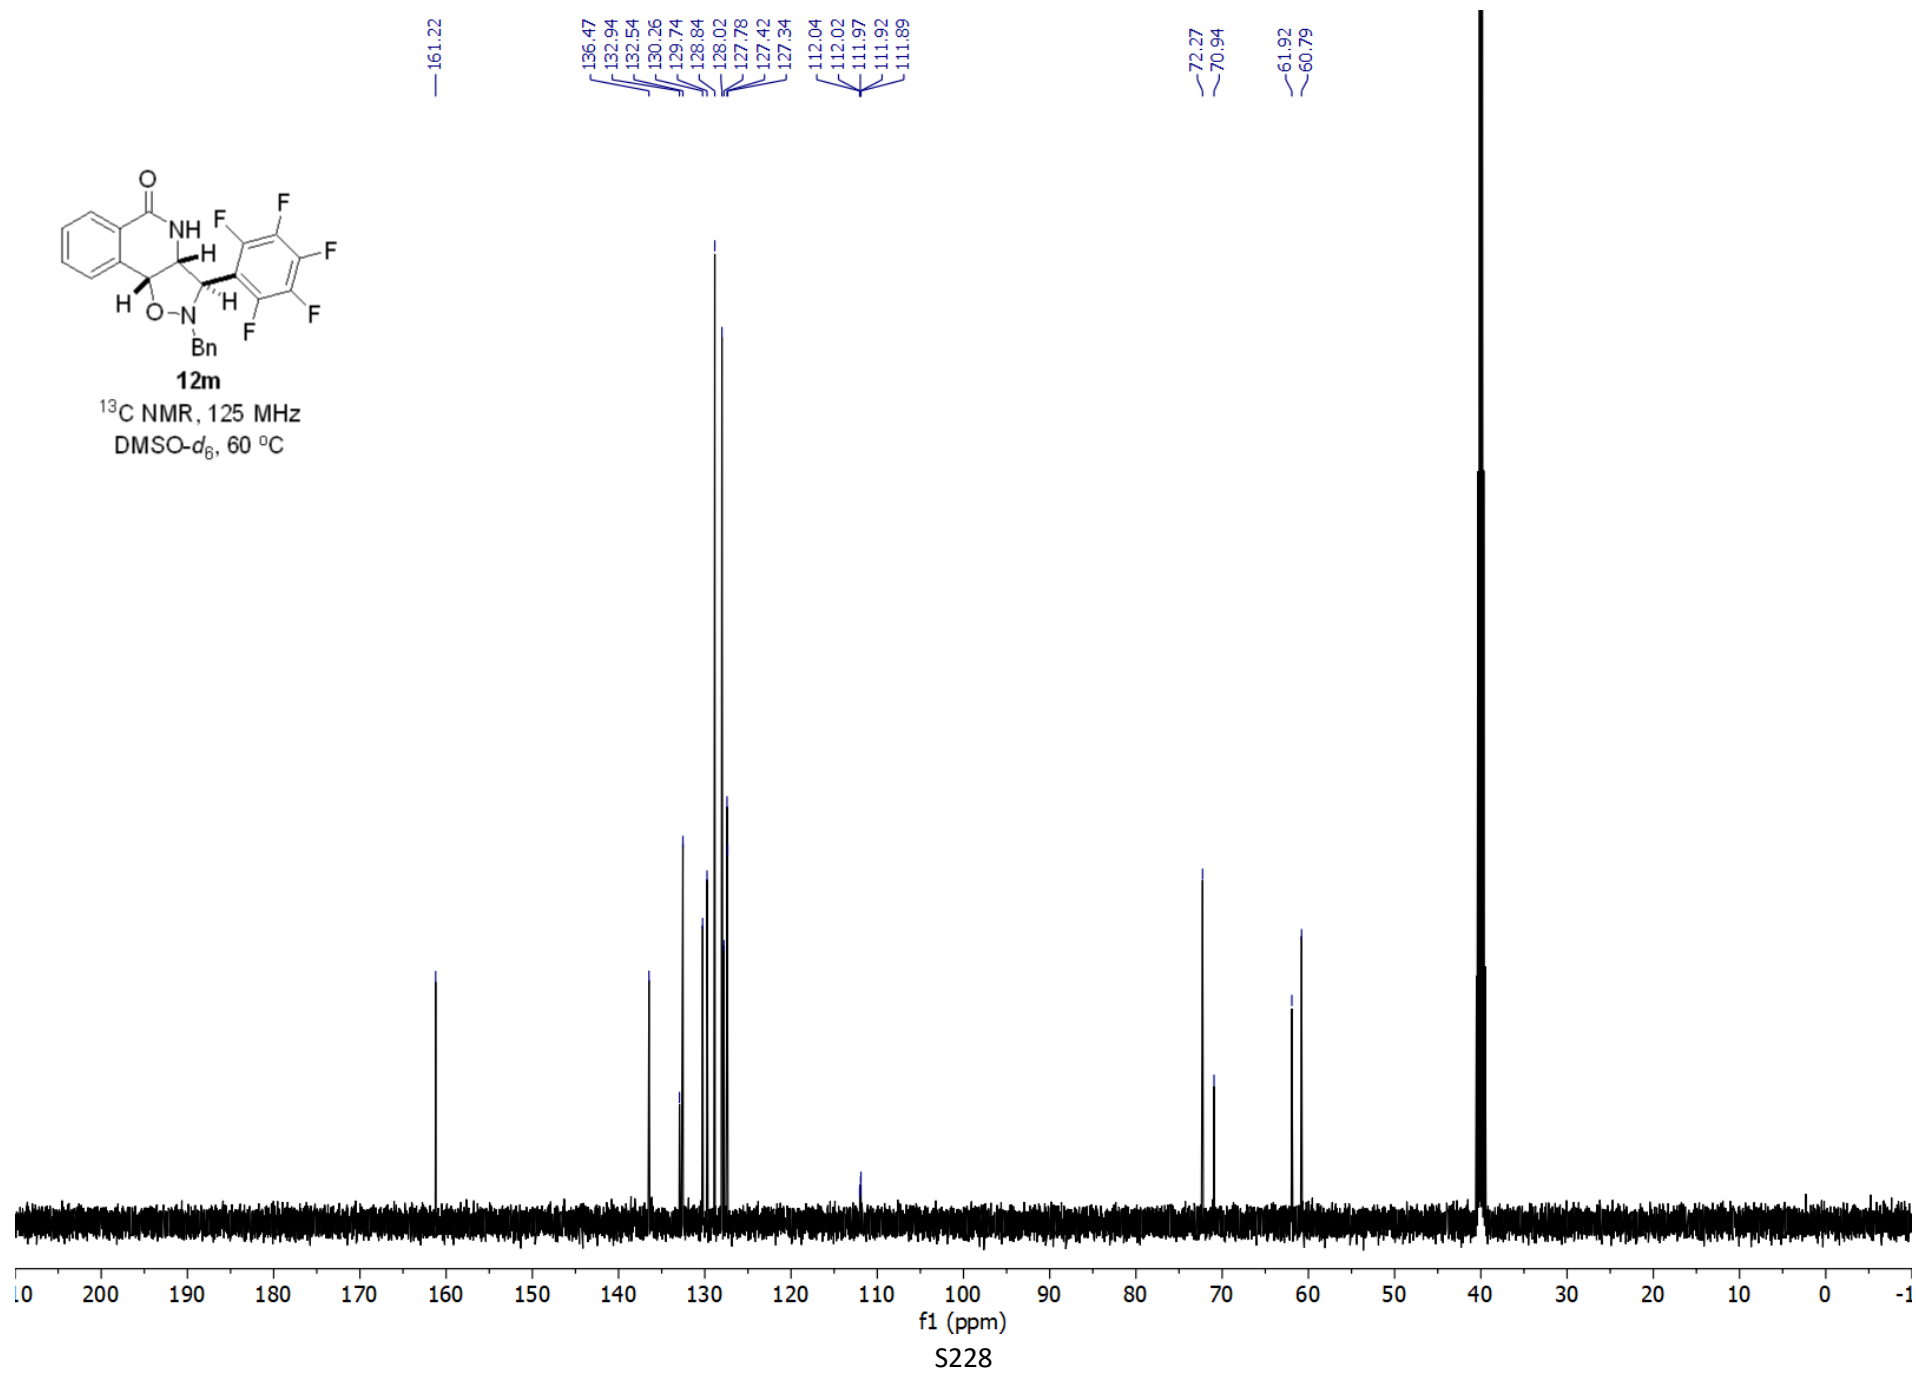

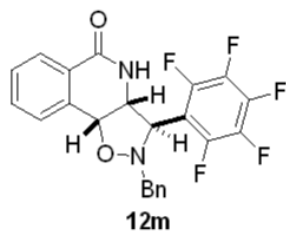

$^{19}\text{F}$  NMR, 470 MHz  
DMSO- $d_6$ , 25 °C

139.37  
139.40  
153.07  
153.11  
153.16  
161.53  
161.55  
161.58  
161.60  
161.63  
161.64

2.01

1.00

2.02

f1 (ppm)

S229

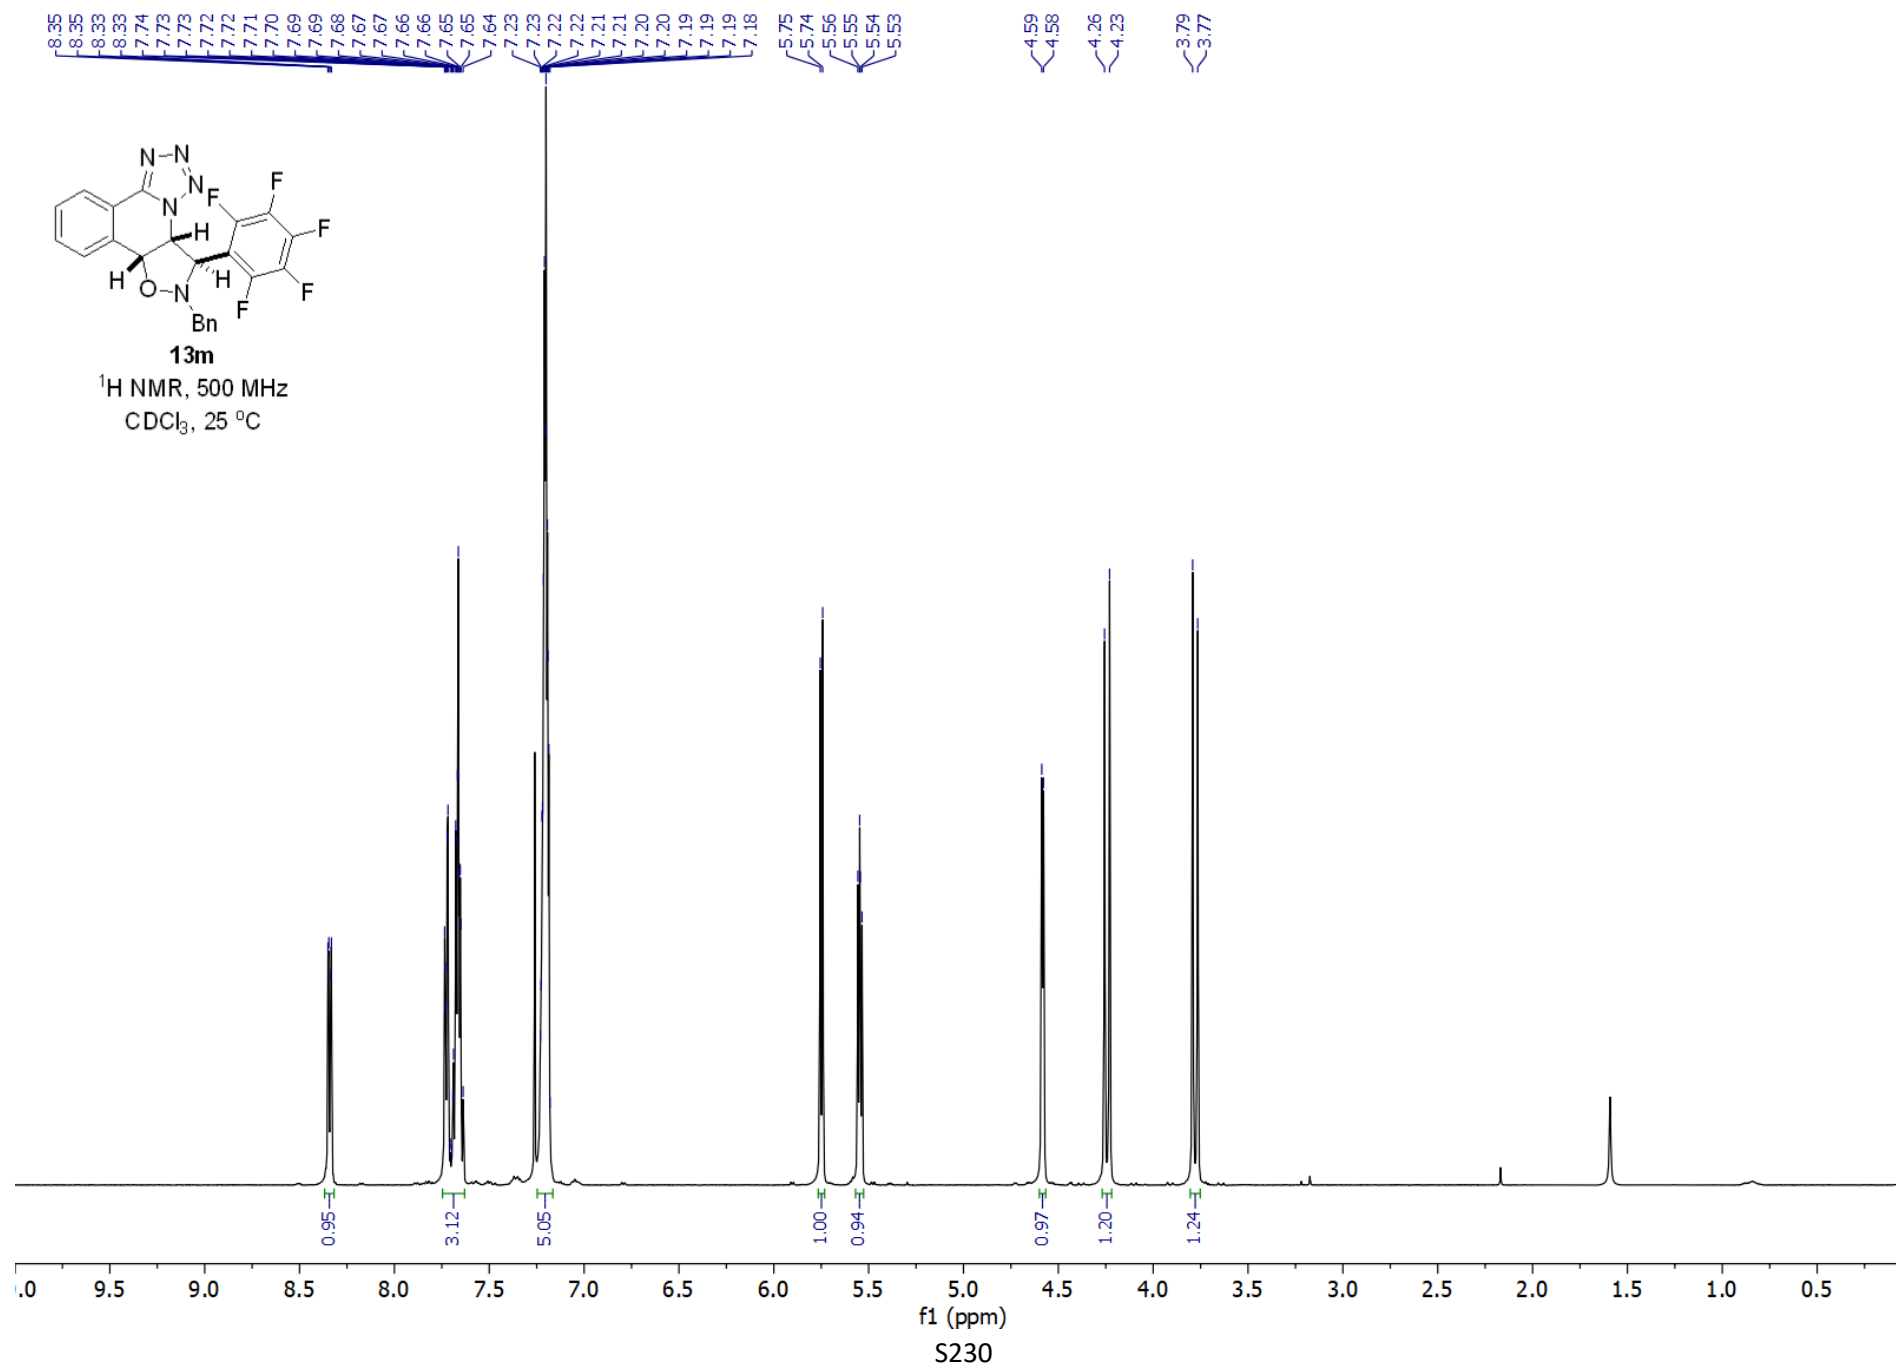

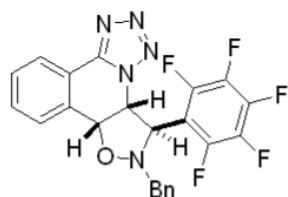

**13m**

$^{13}\text{C}$  NMR, 125 MHz  
 $\text{CDCl}_3$ , 25  $^\circ\text{C}$

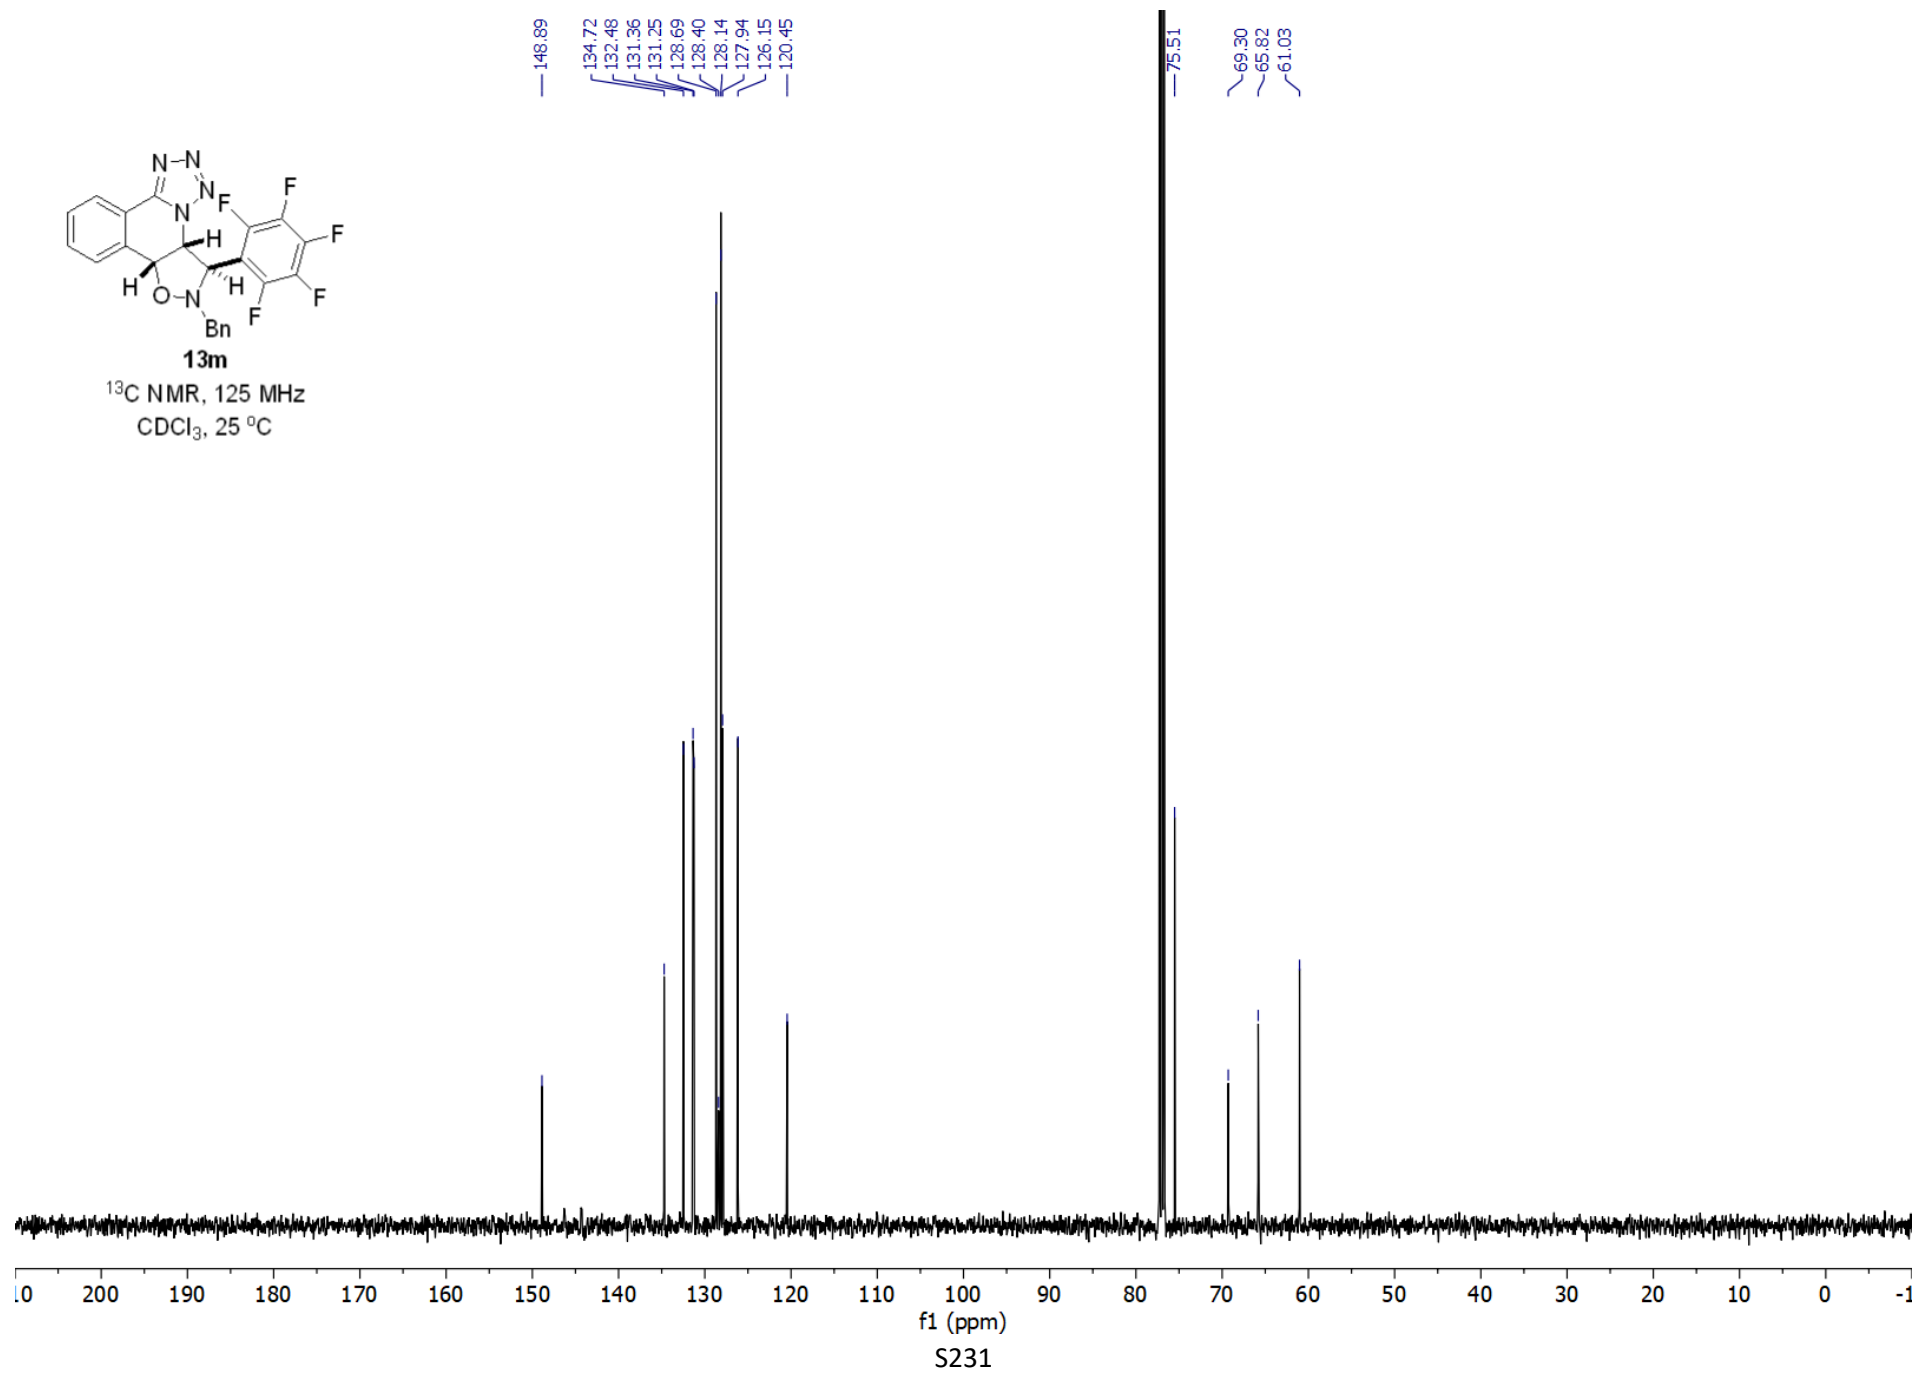

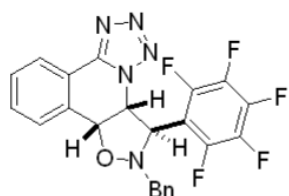

**13m**

$^{19}\text{F}$  NMR, 470 MHz  
 $\text{CDCl}_3$ , 25  $^\circ\text{C}$

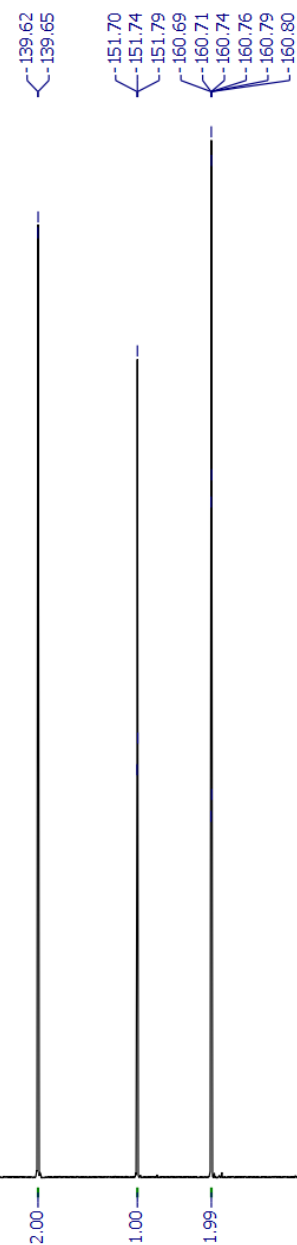

10 20 10 0 -10 -20 -30 -40 -50 -60 -70 -80 -90 -100 -110 -120 -130 -140 -150 -160 -170 -180 -190 -200

f1 (ppm)

S232

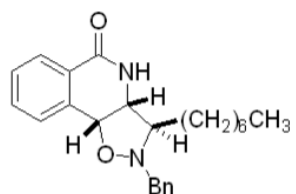

**12n**

$^1\text{H}$  NMR, 500 MHz  
DMSO- $d_6$ , 60  $^\circ\text{C}$

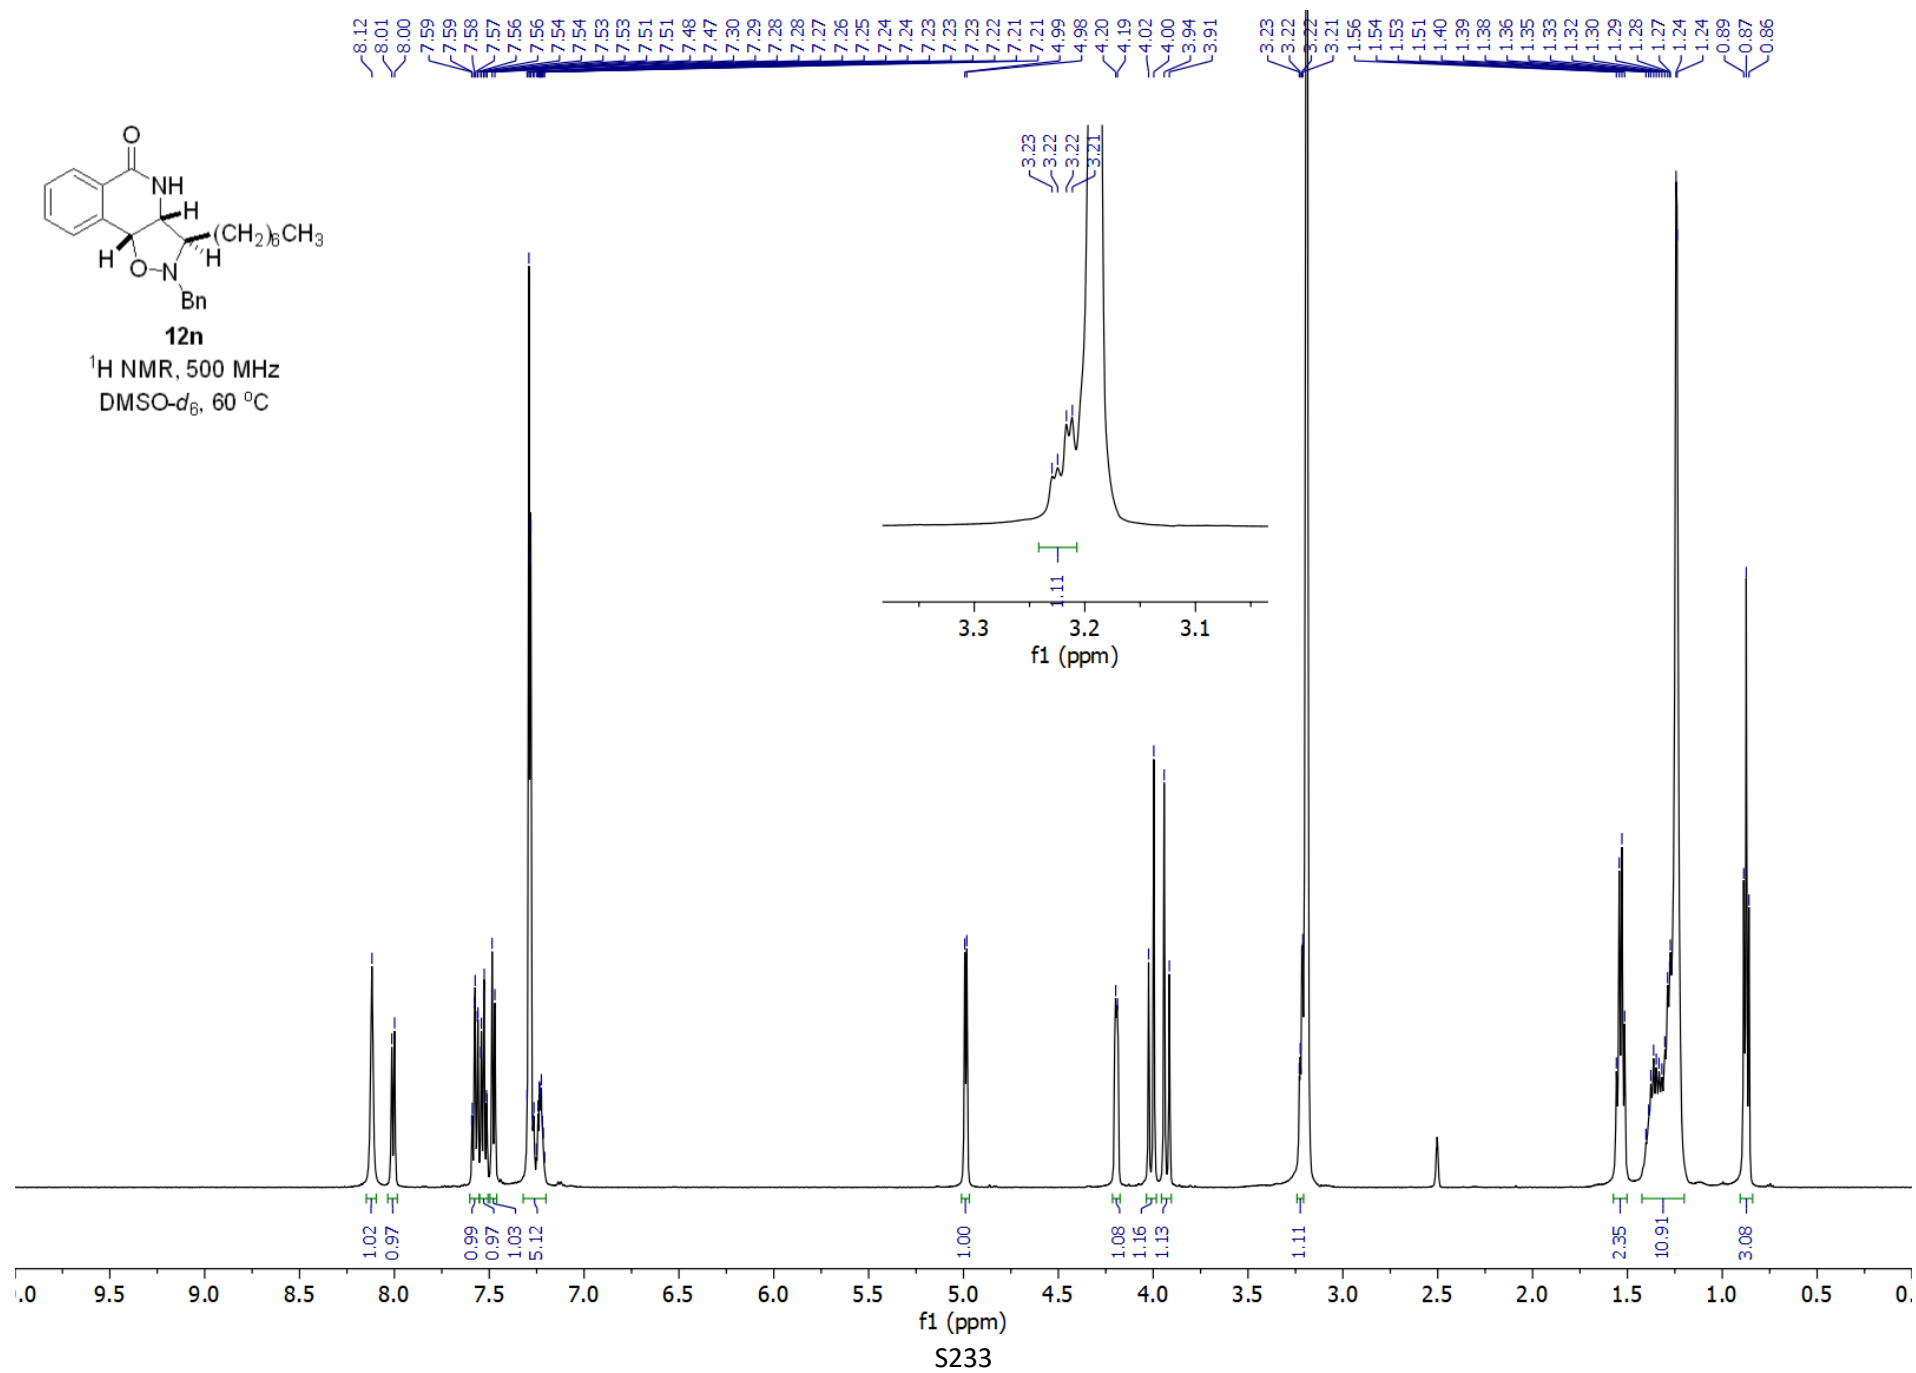

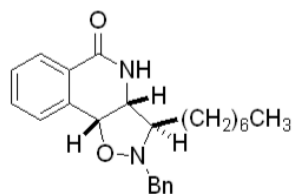

**12n**

$^{13}\text{C}$  NMR, 125 MHz  
DMSO- $d_6$ , 60  $^{\circ}\text{C}$

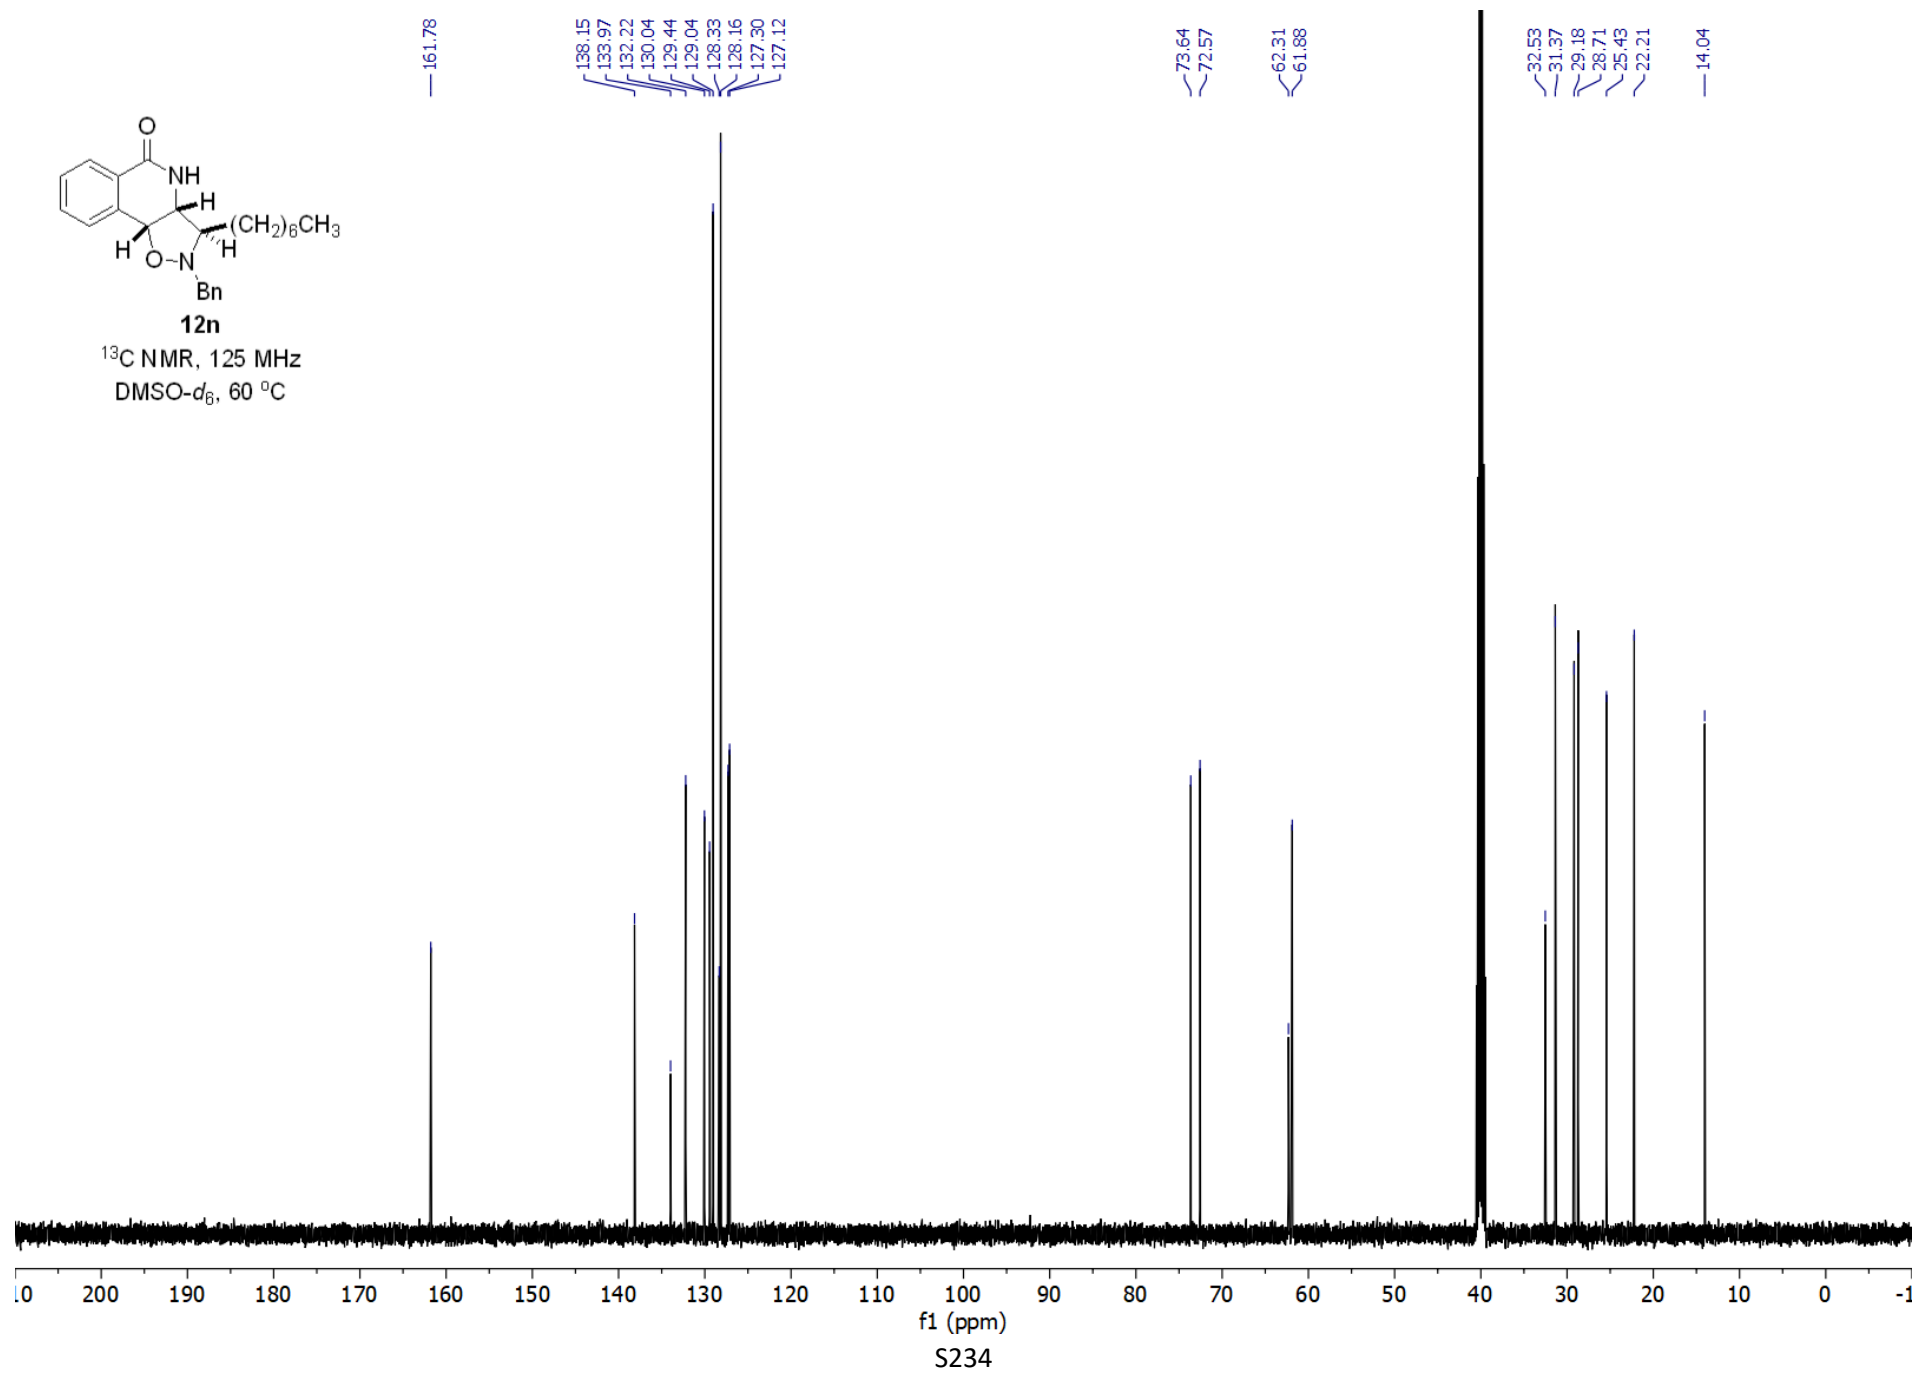

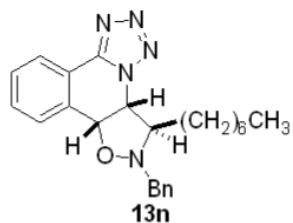

$^1\text{H}$  NMR, 500 MHz  
 $\text{CDCl}_3$ , 25  $^\circ\text{C}$

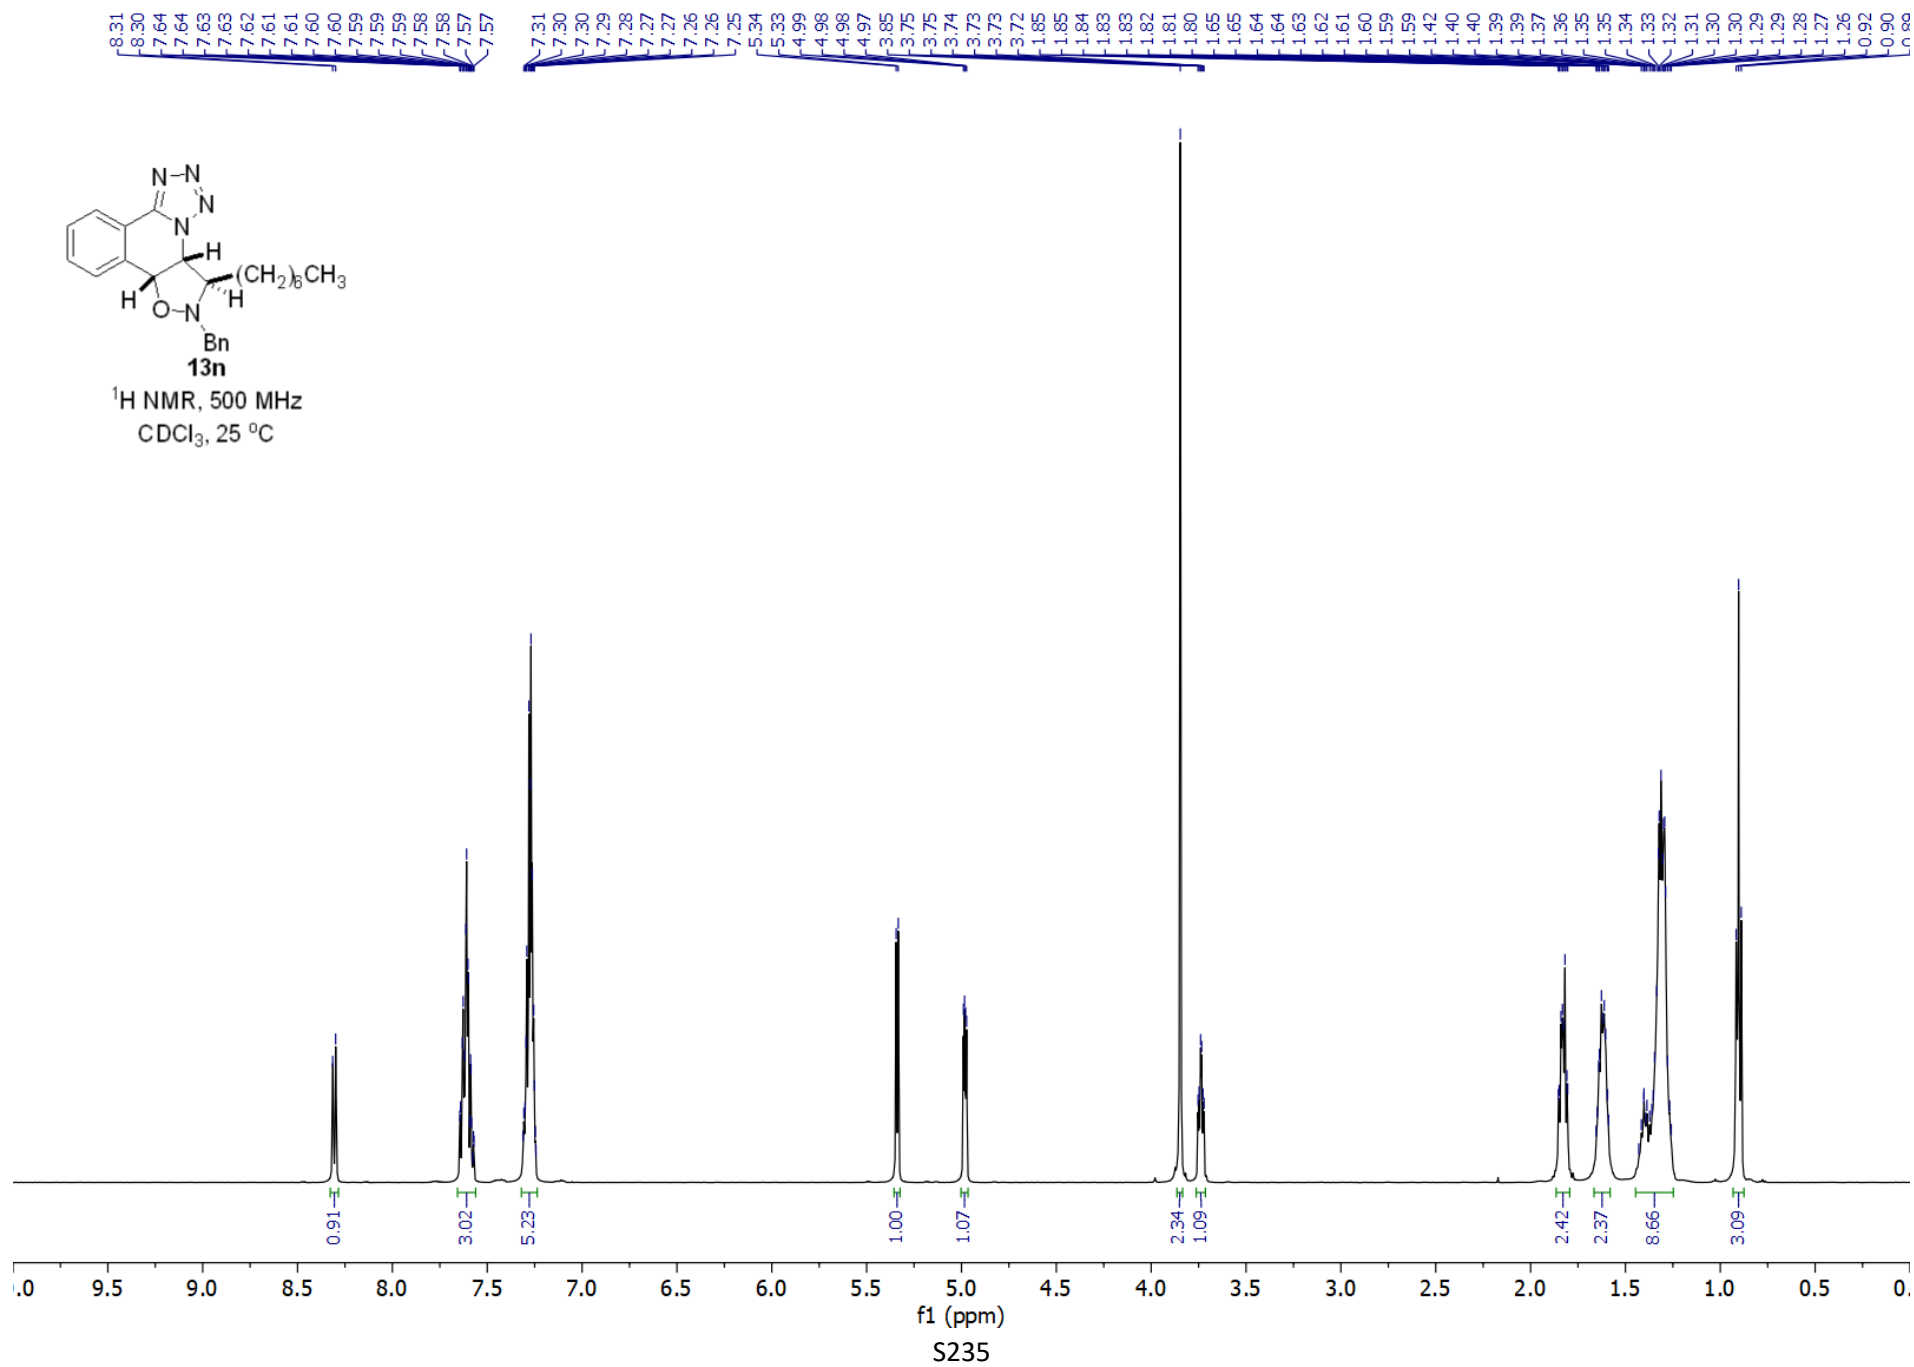

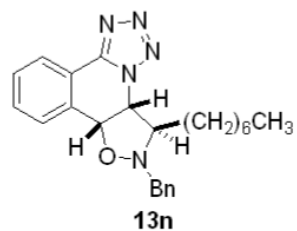

$^{13}\text{C}$  NMR, 125 MHz  
 $\text{CDCl}_3$ , 25  $^\circ\text{C}$

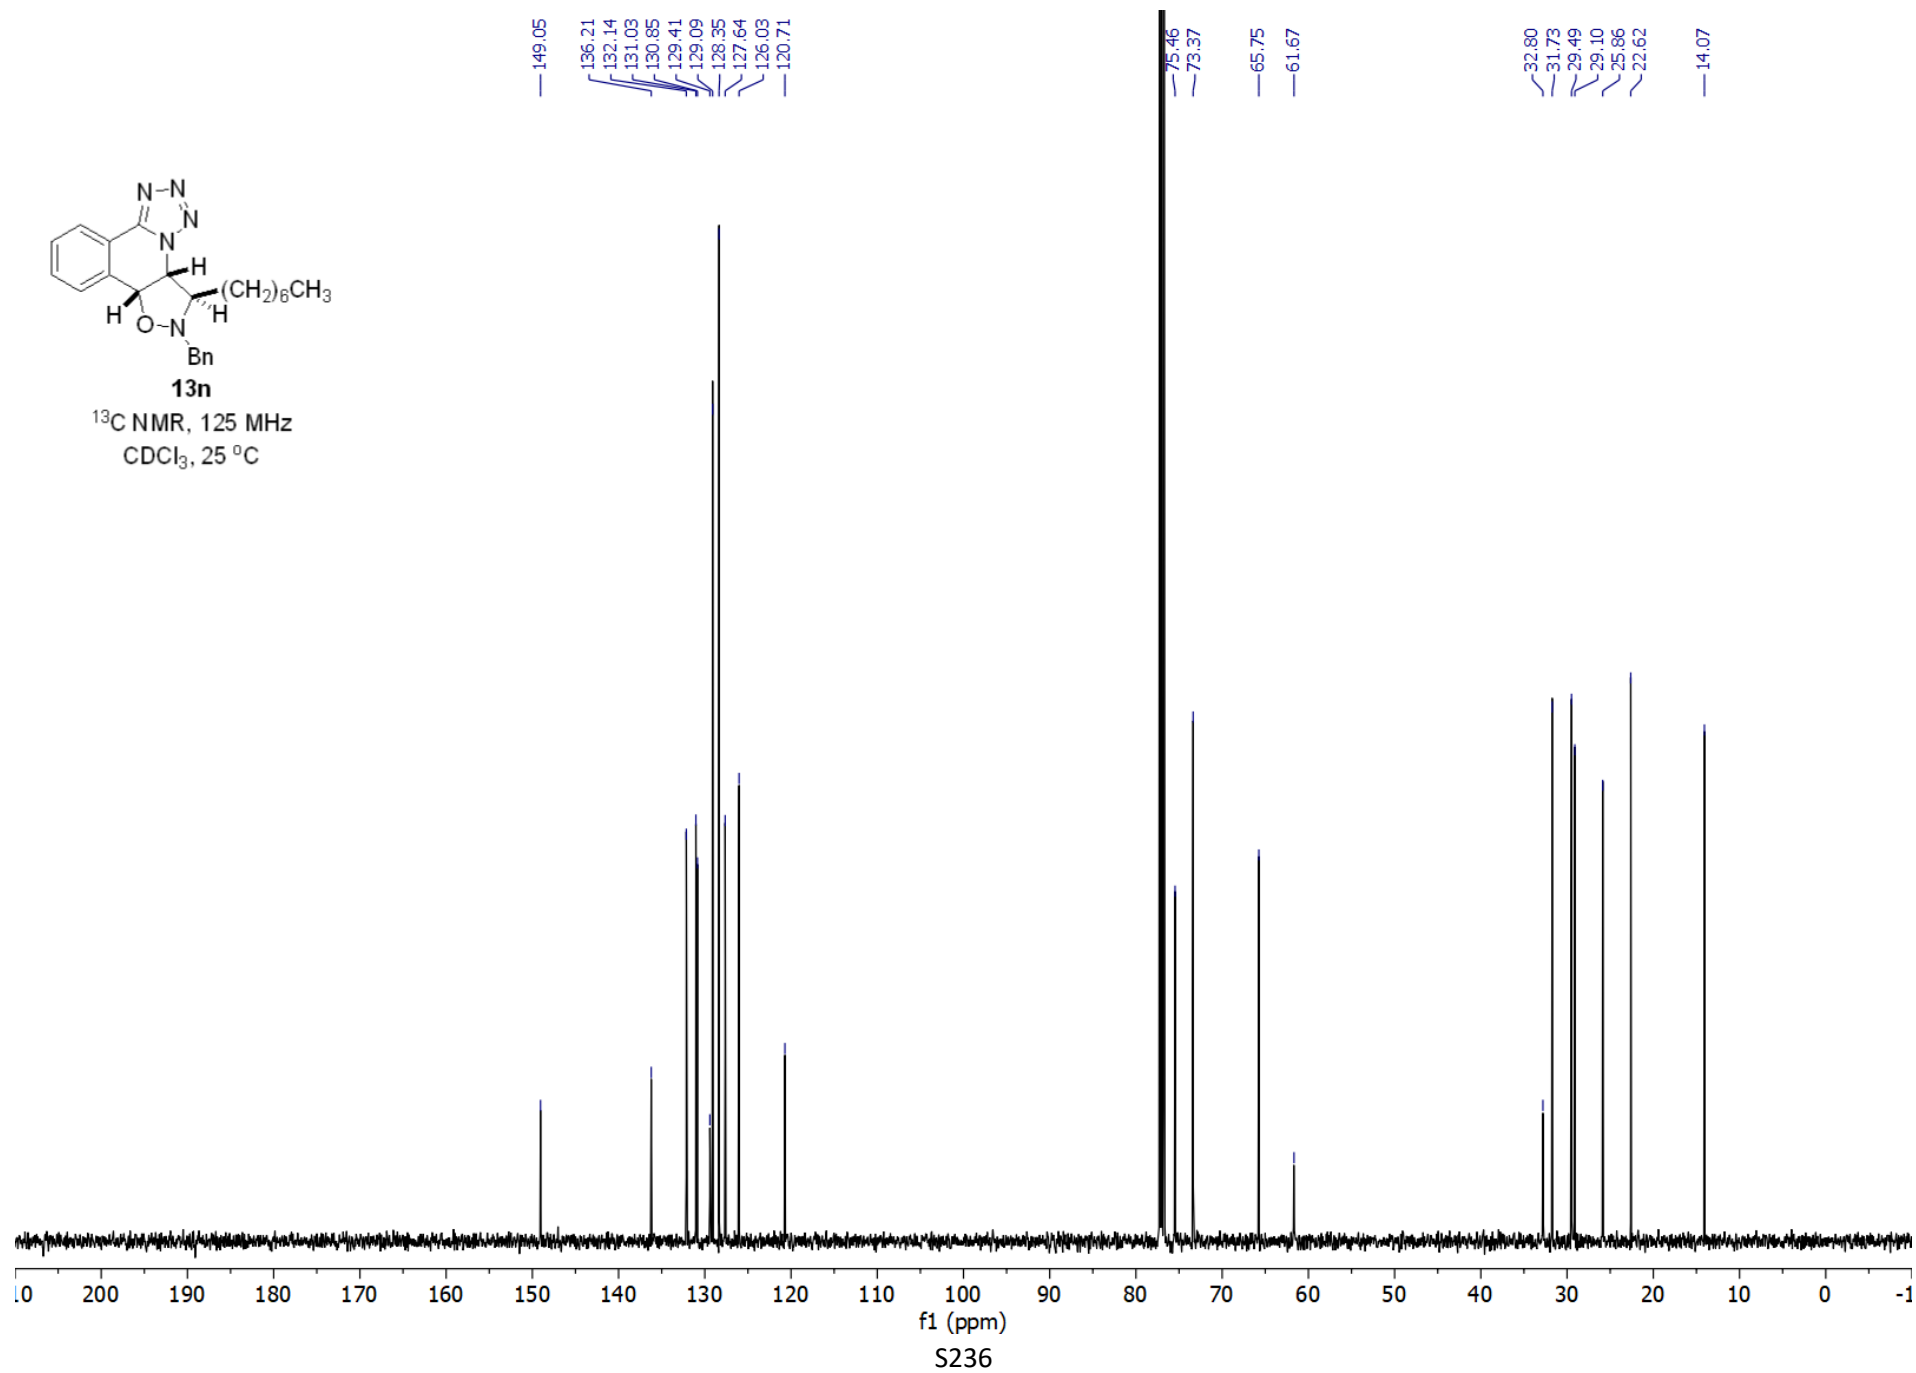

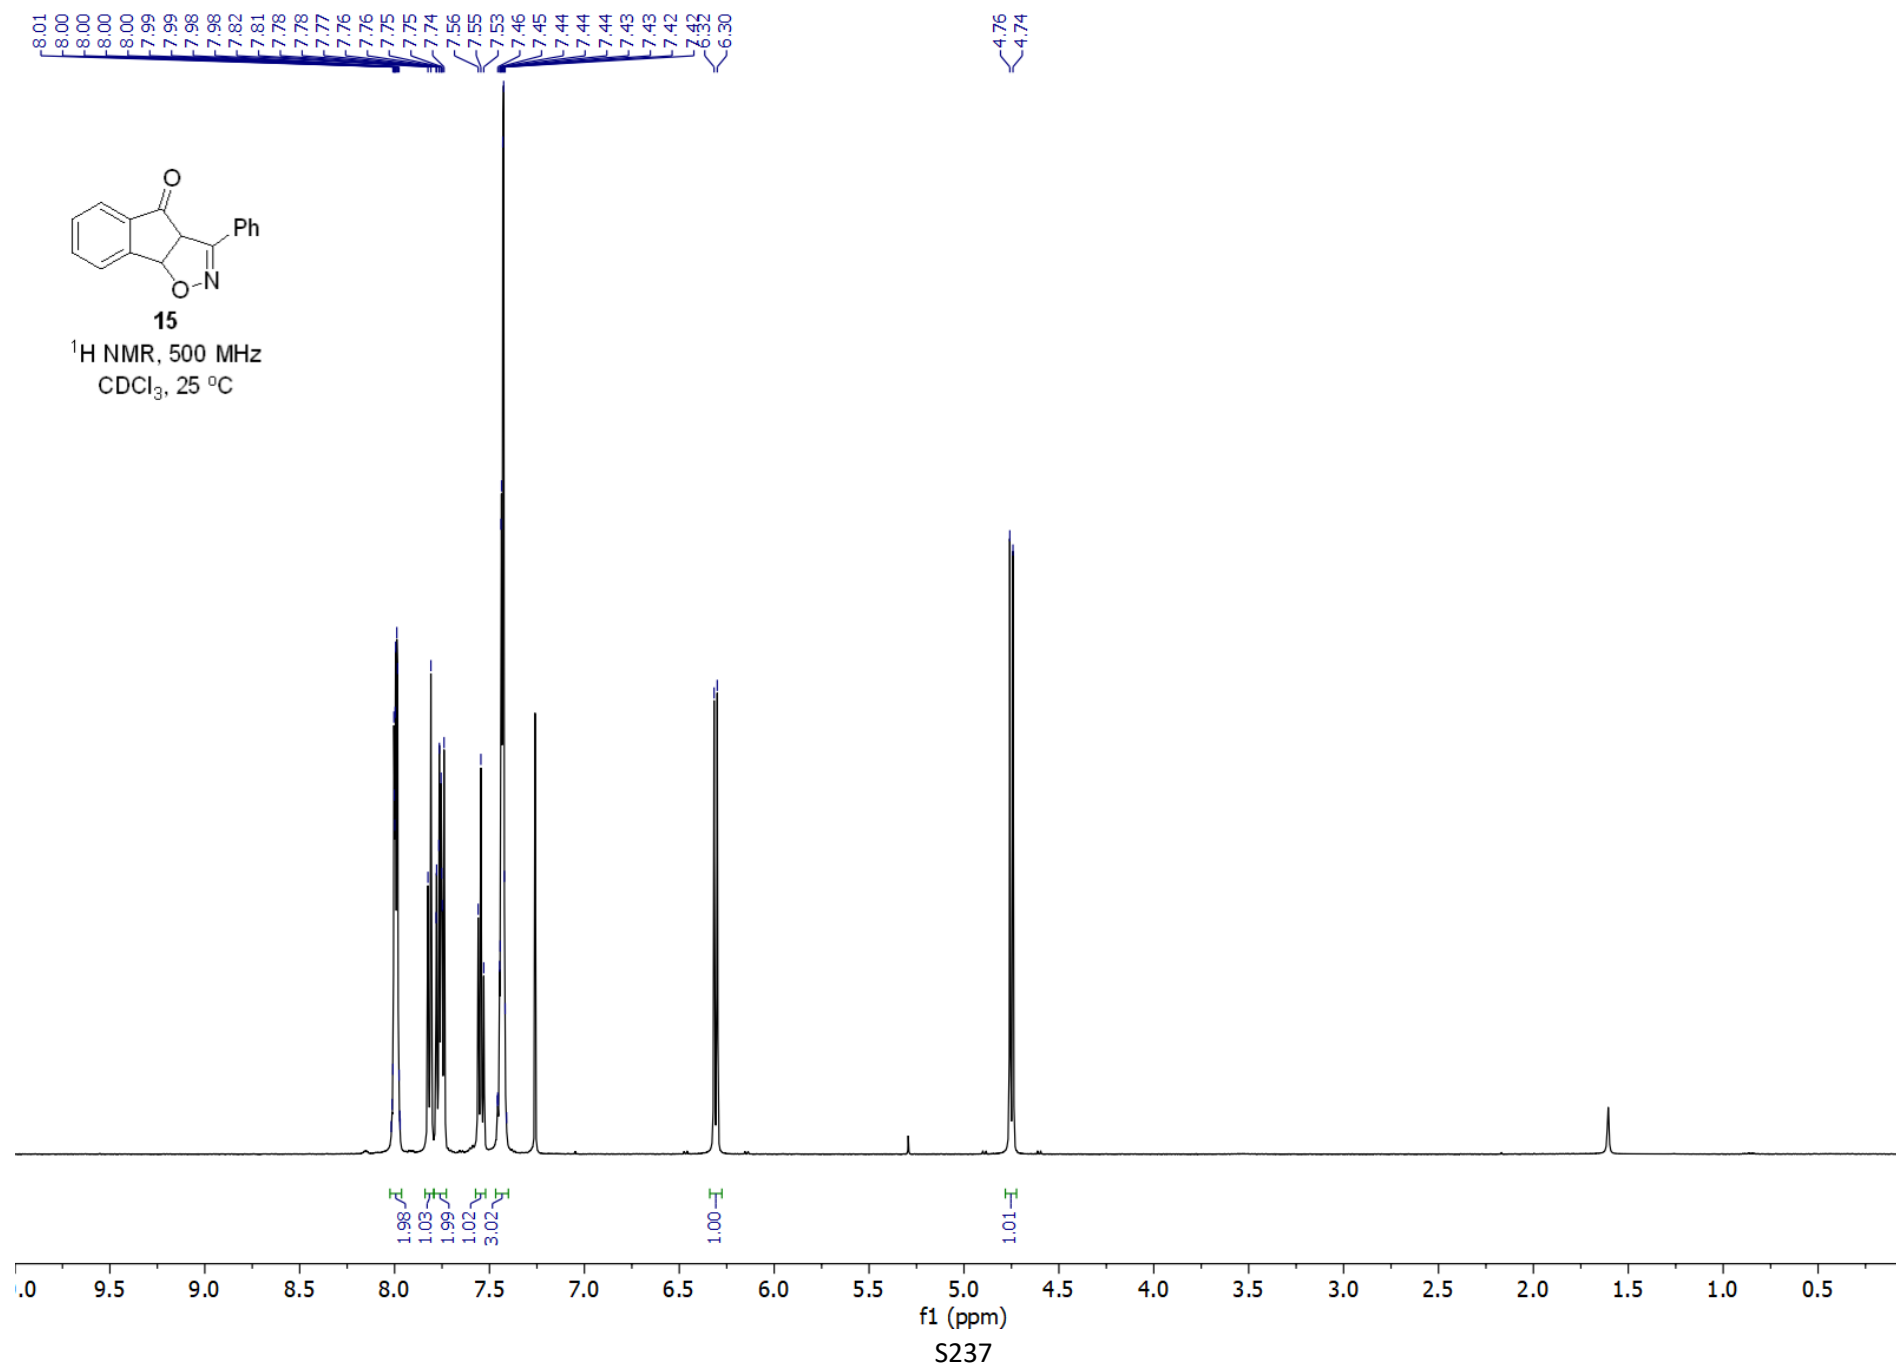

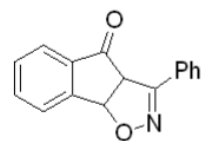

**15**

$^{13}\text{C}$  NMR, 125 MHz  
 $\text{CDCl}_3$ , 25  $^\circ\text{C}$

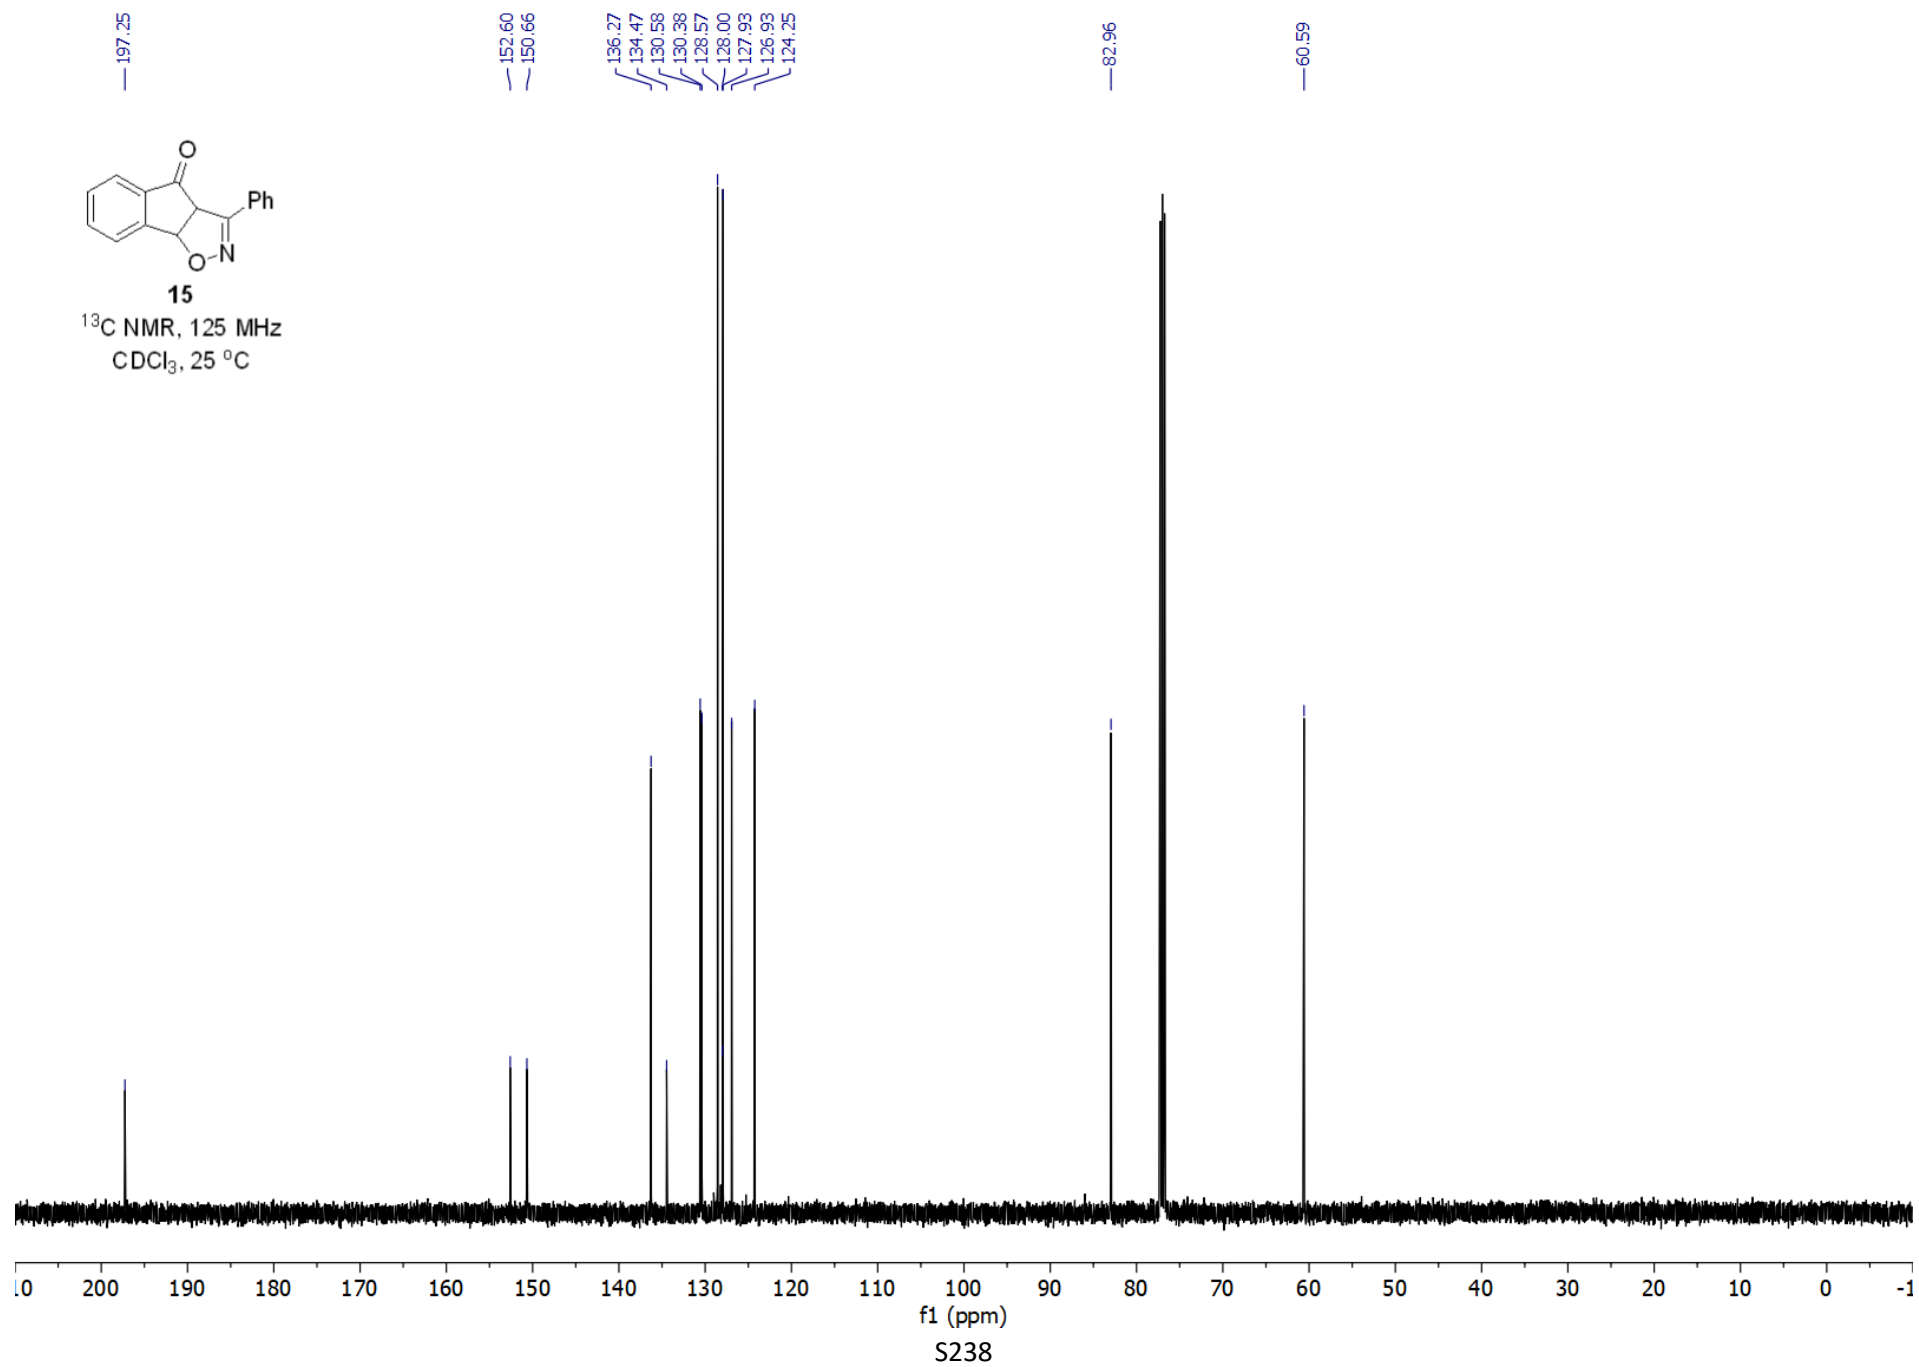

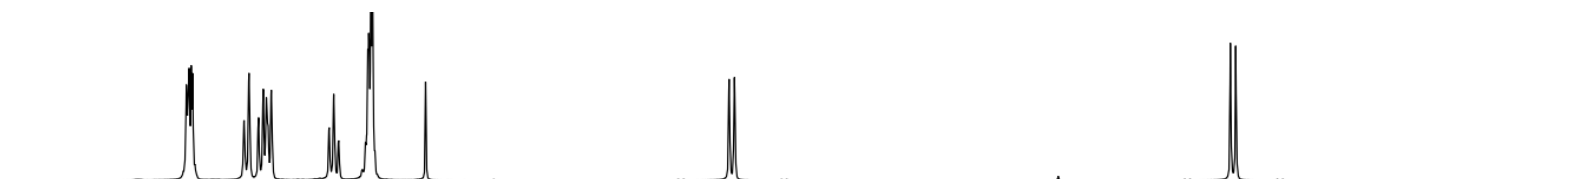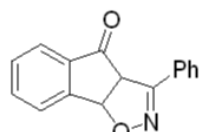

**15**

COSY  $^1\text{H}$ - $^1\text{H}$  NMR, 500 MHz  
 $\text{CDCl}_3$ , 25  $^\circ\text{C}$

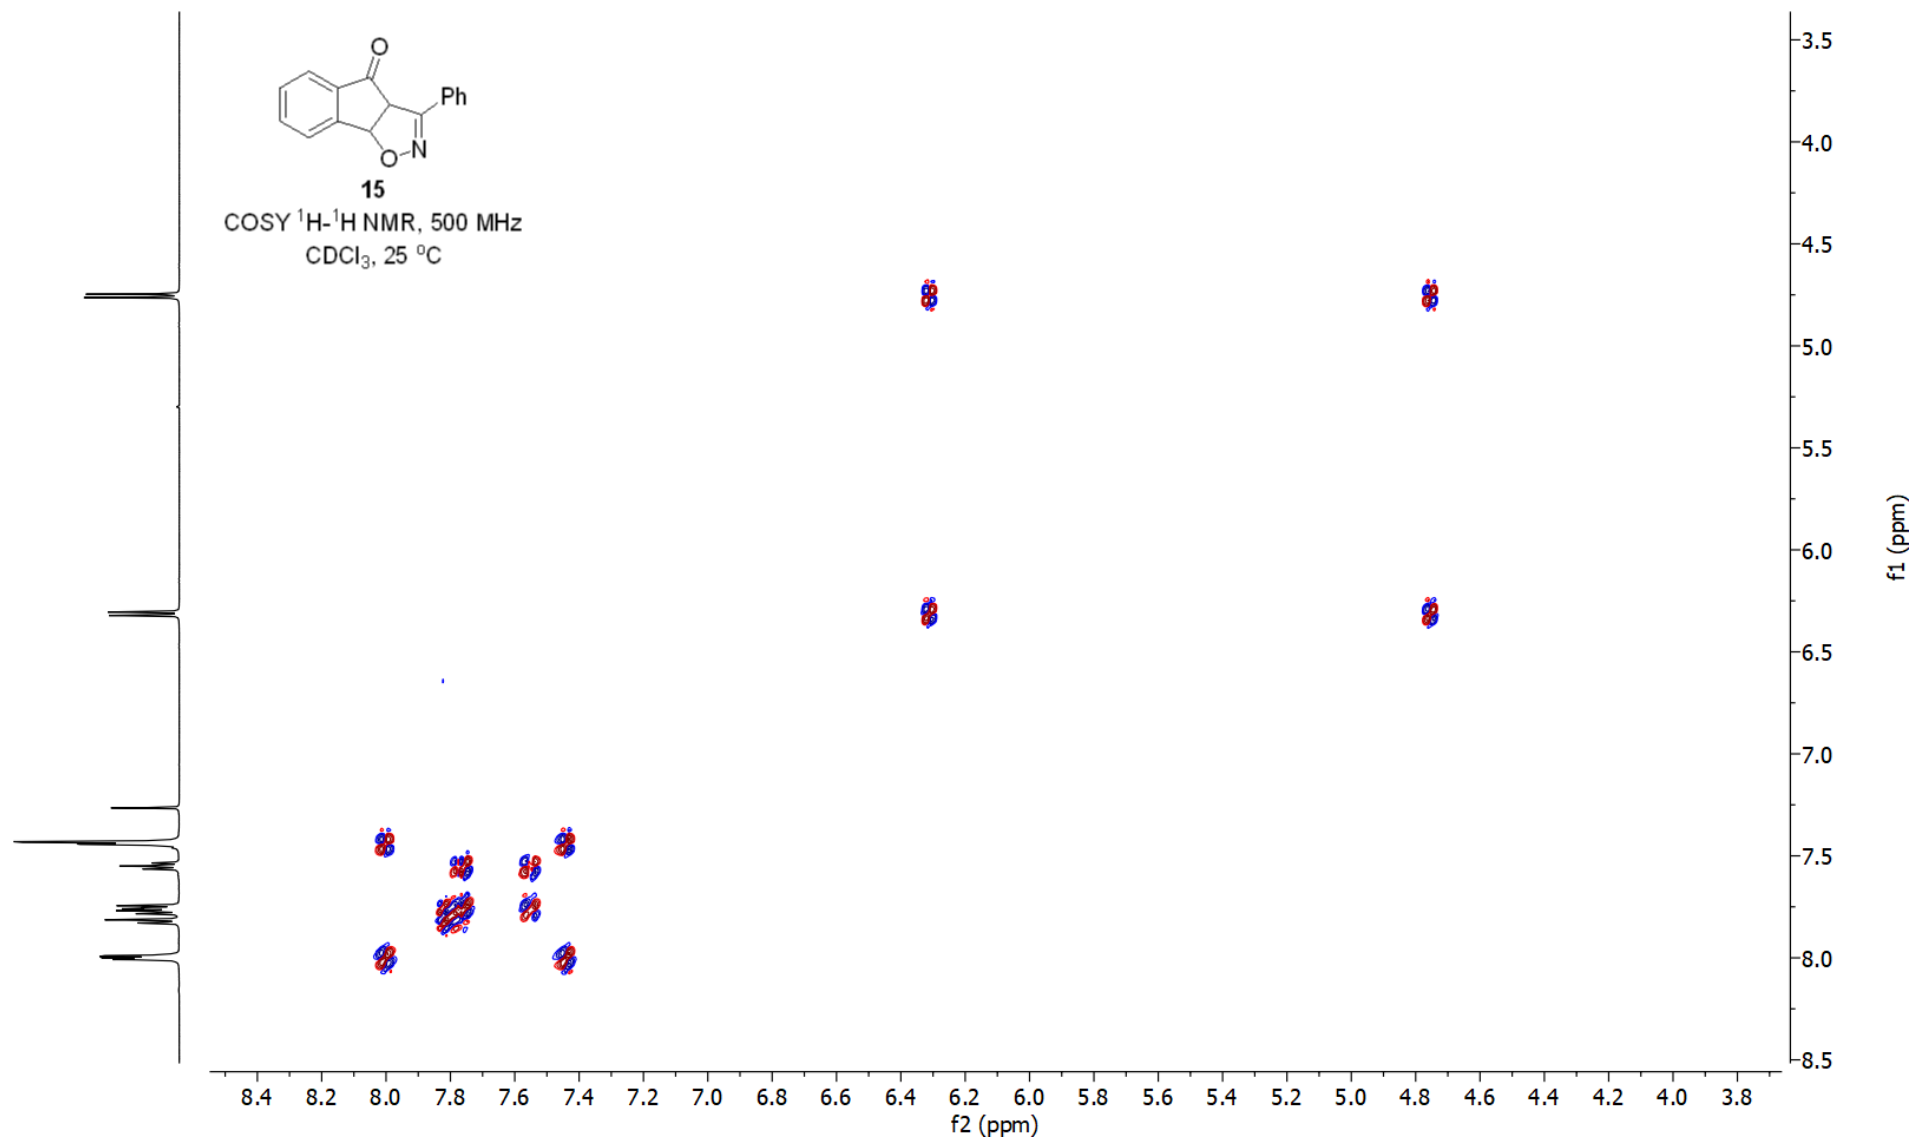

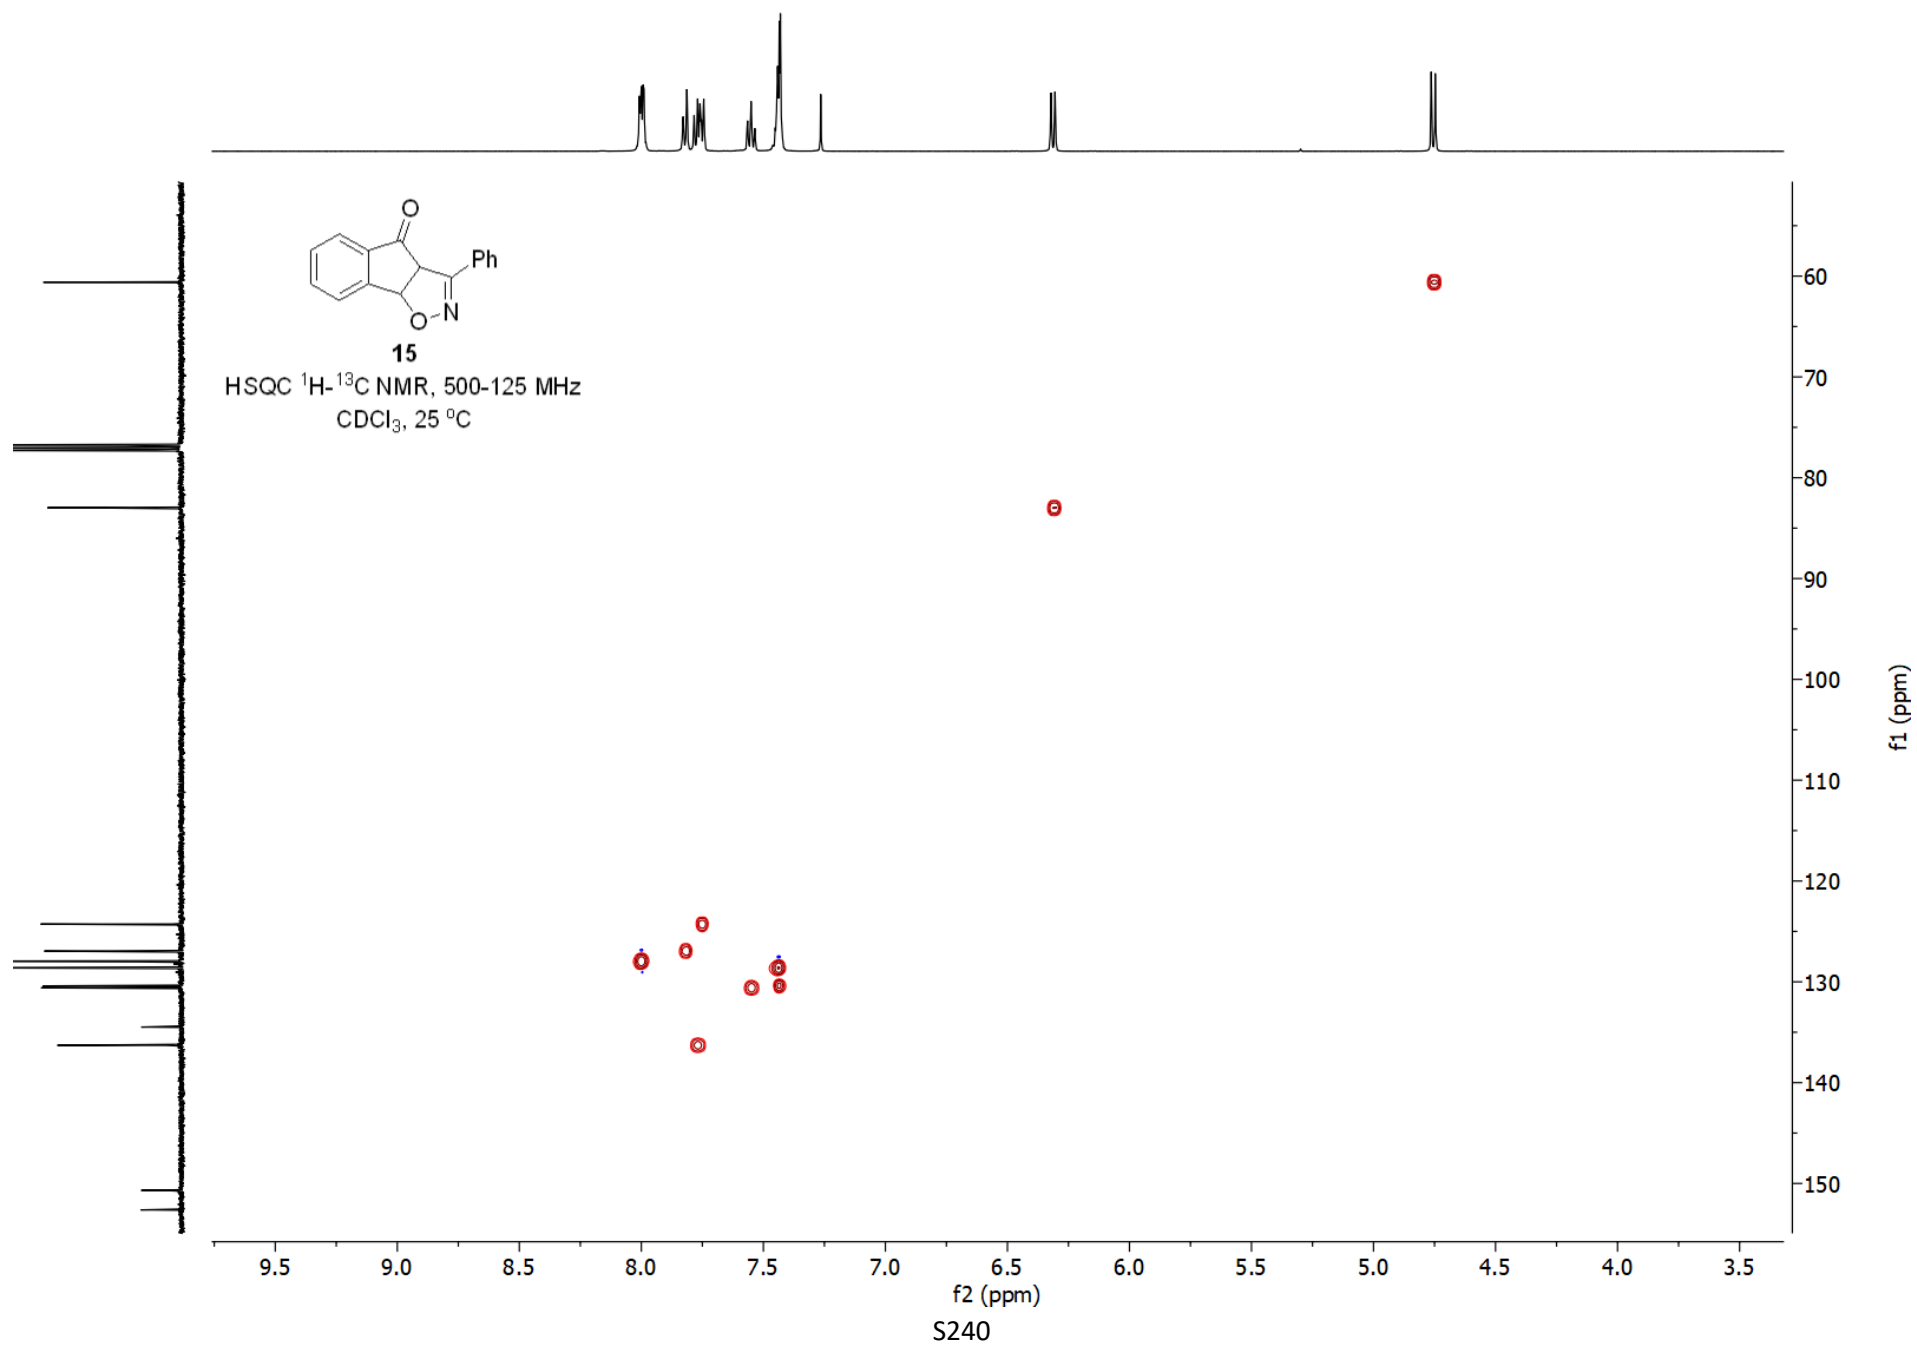

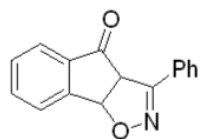

**15**

HMBC  $^1\text{H}$ - $^{13}\text{C}$  NMR, 500-125 MHz  
 $\text{CDCl}_3$ , 25  $^\circ\text{C}$

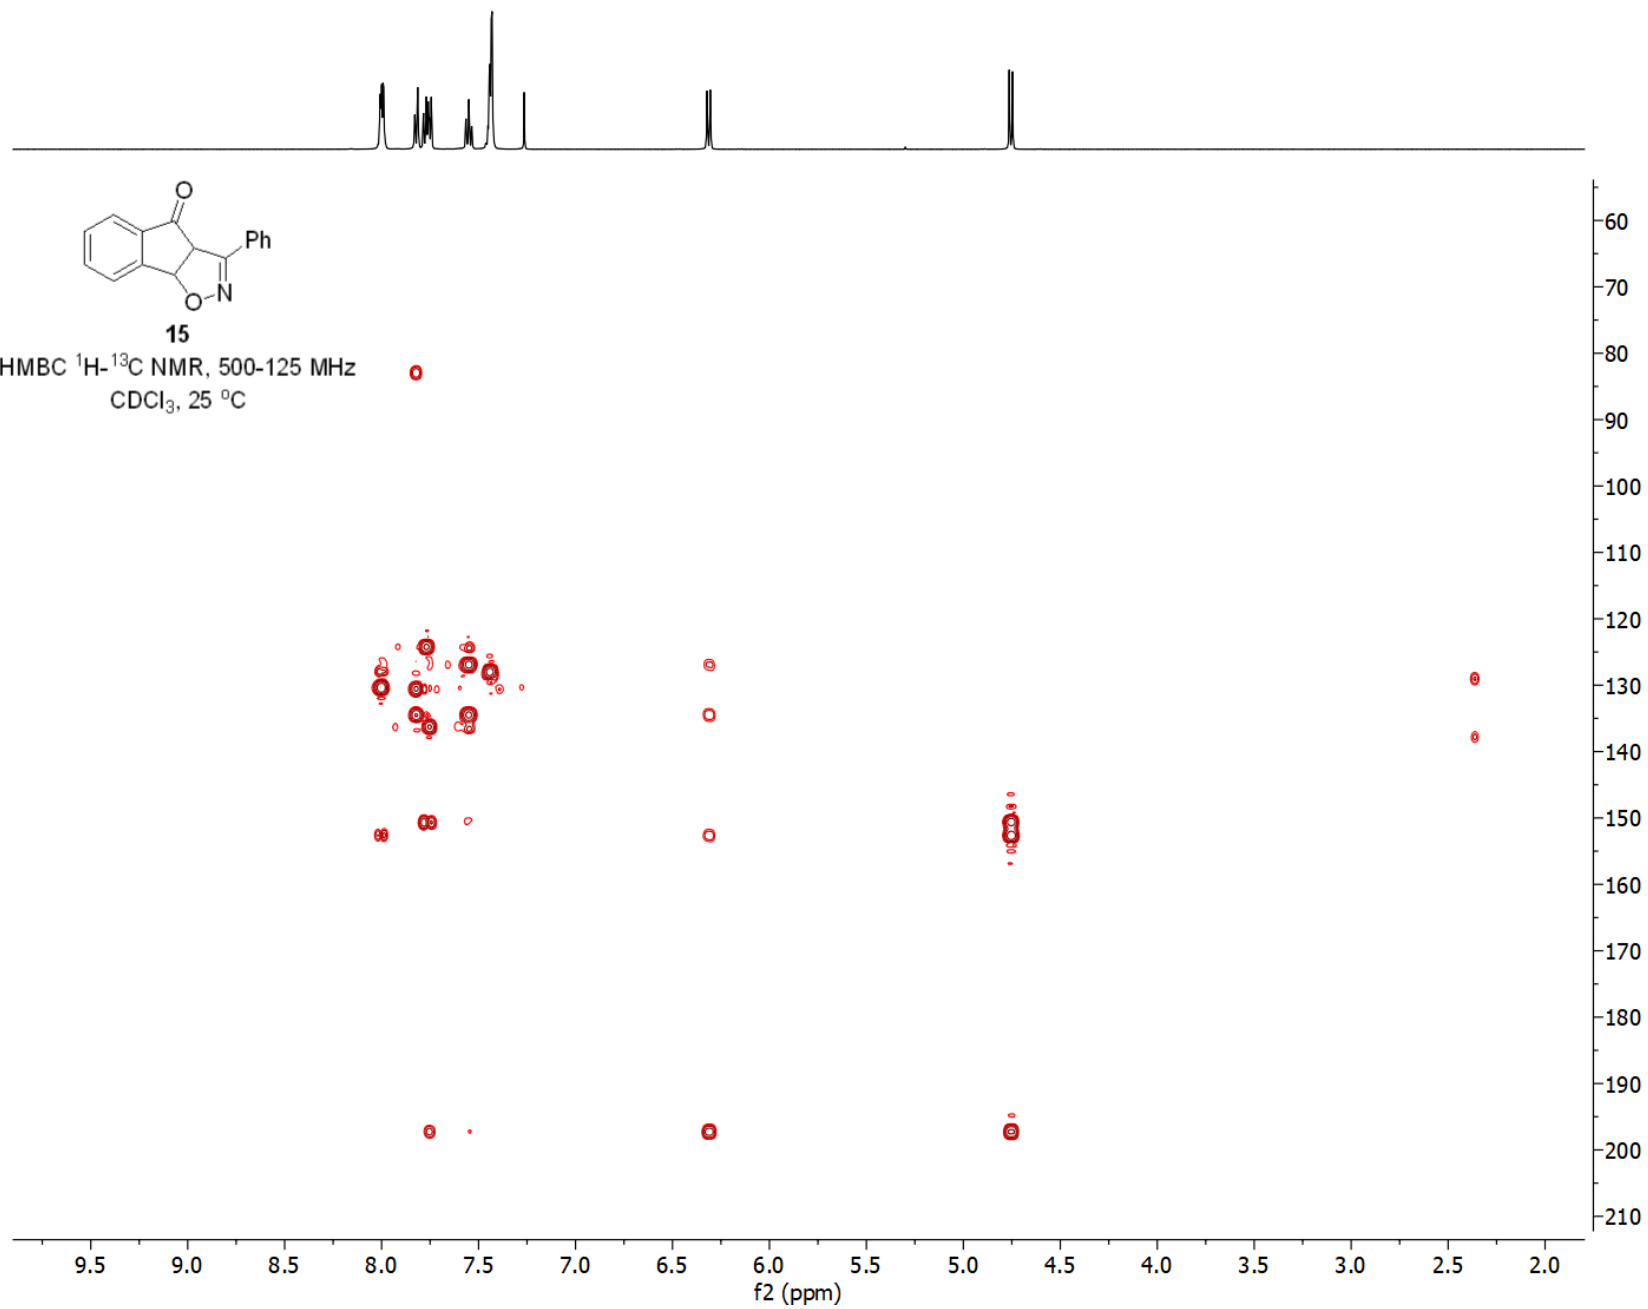

S241

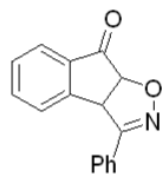

**16**

<sup>1</sup>H NMR, 500 MHz  
CDCl<sub>3</sub>, 25 °C

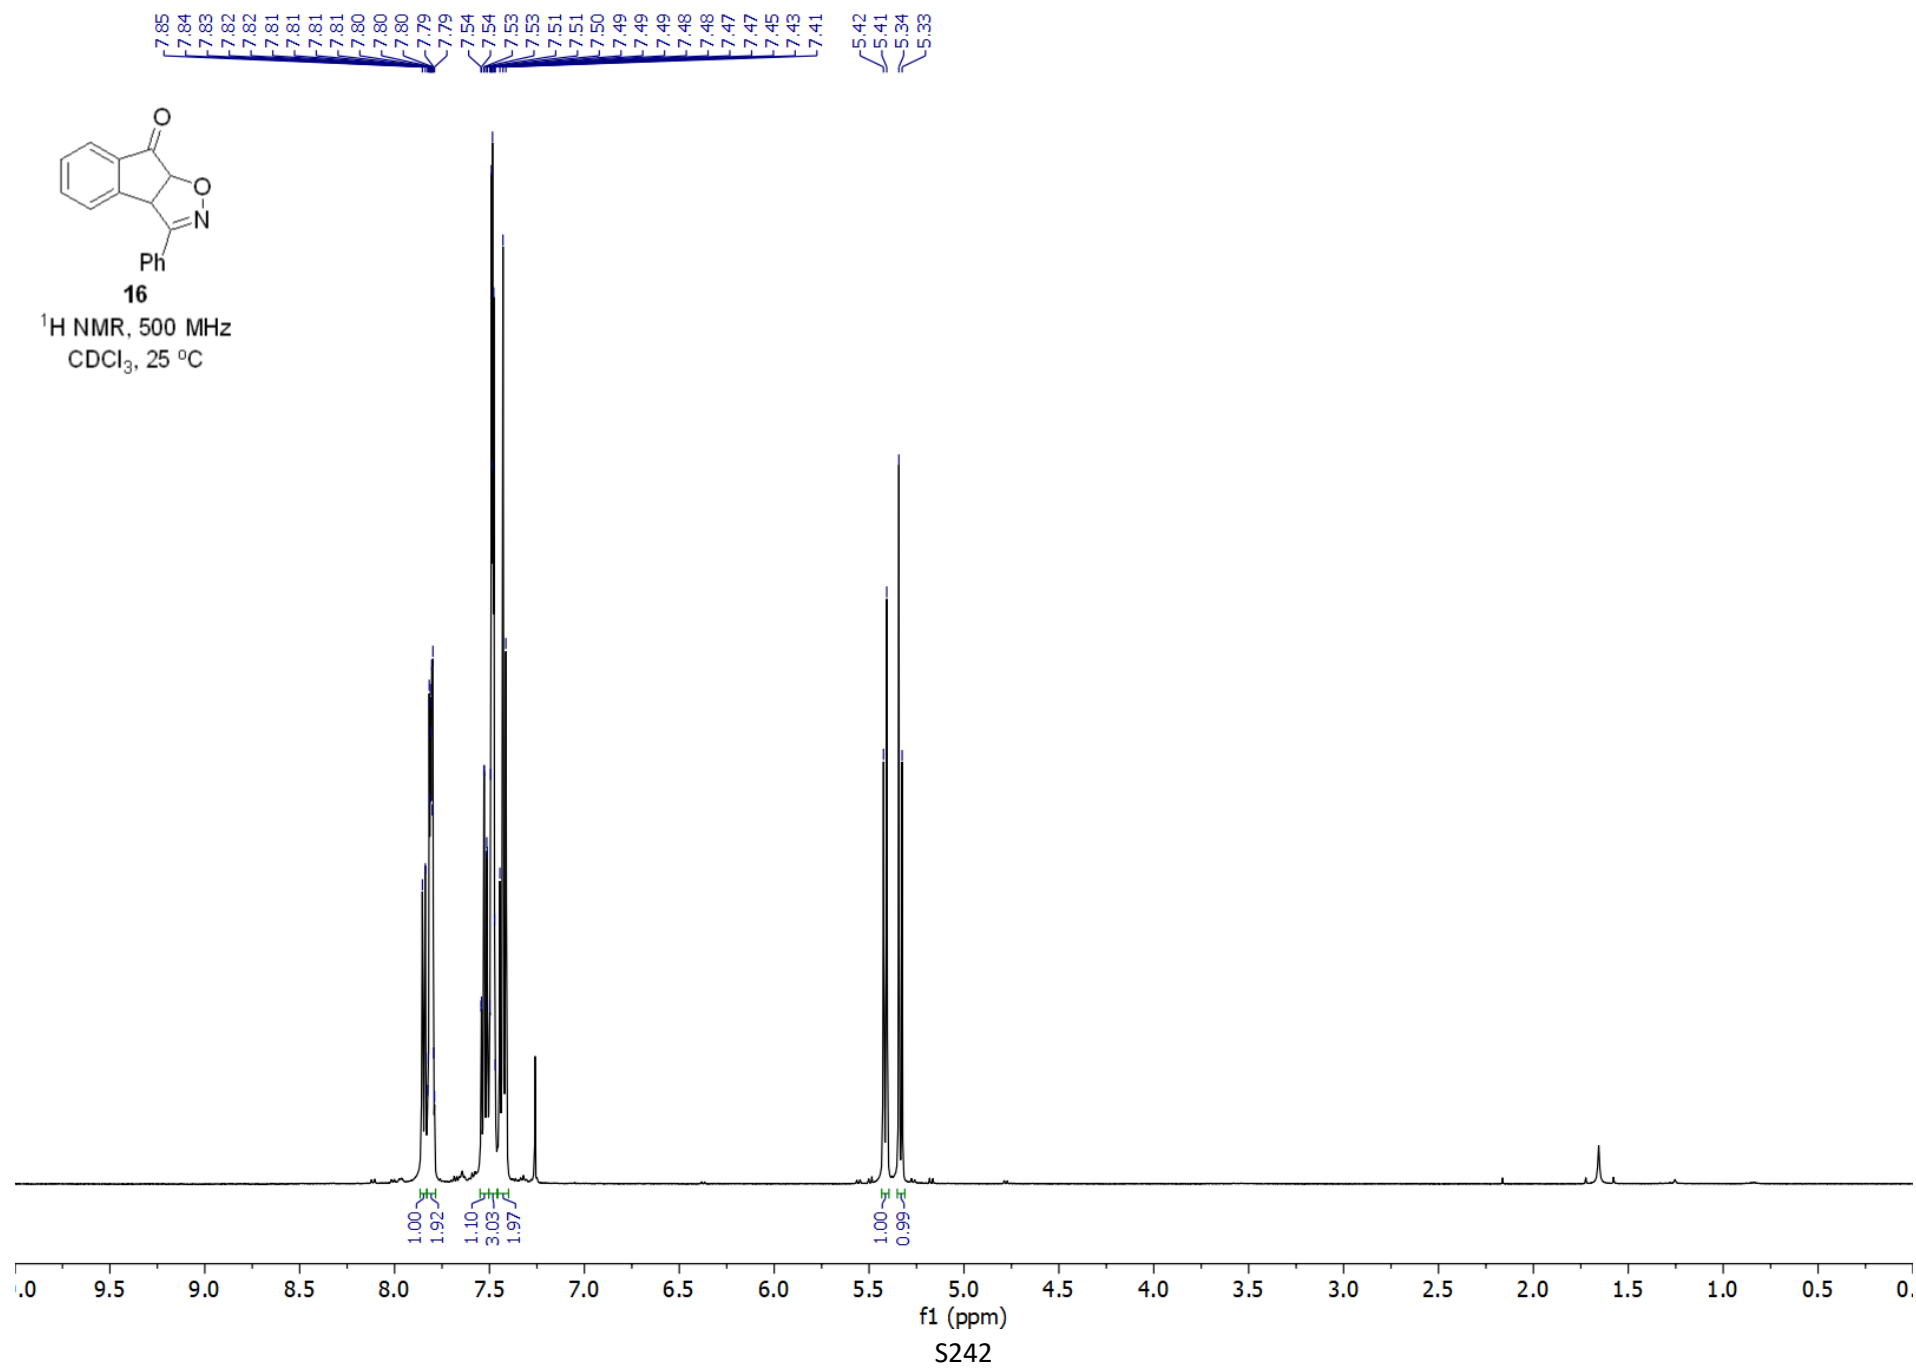

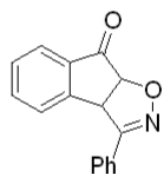

**16**

$^{13}\text{C}$  NMR, 125 MHz  
 $\text{CDCl}_3$ , 25  $^\circ\text{C}$

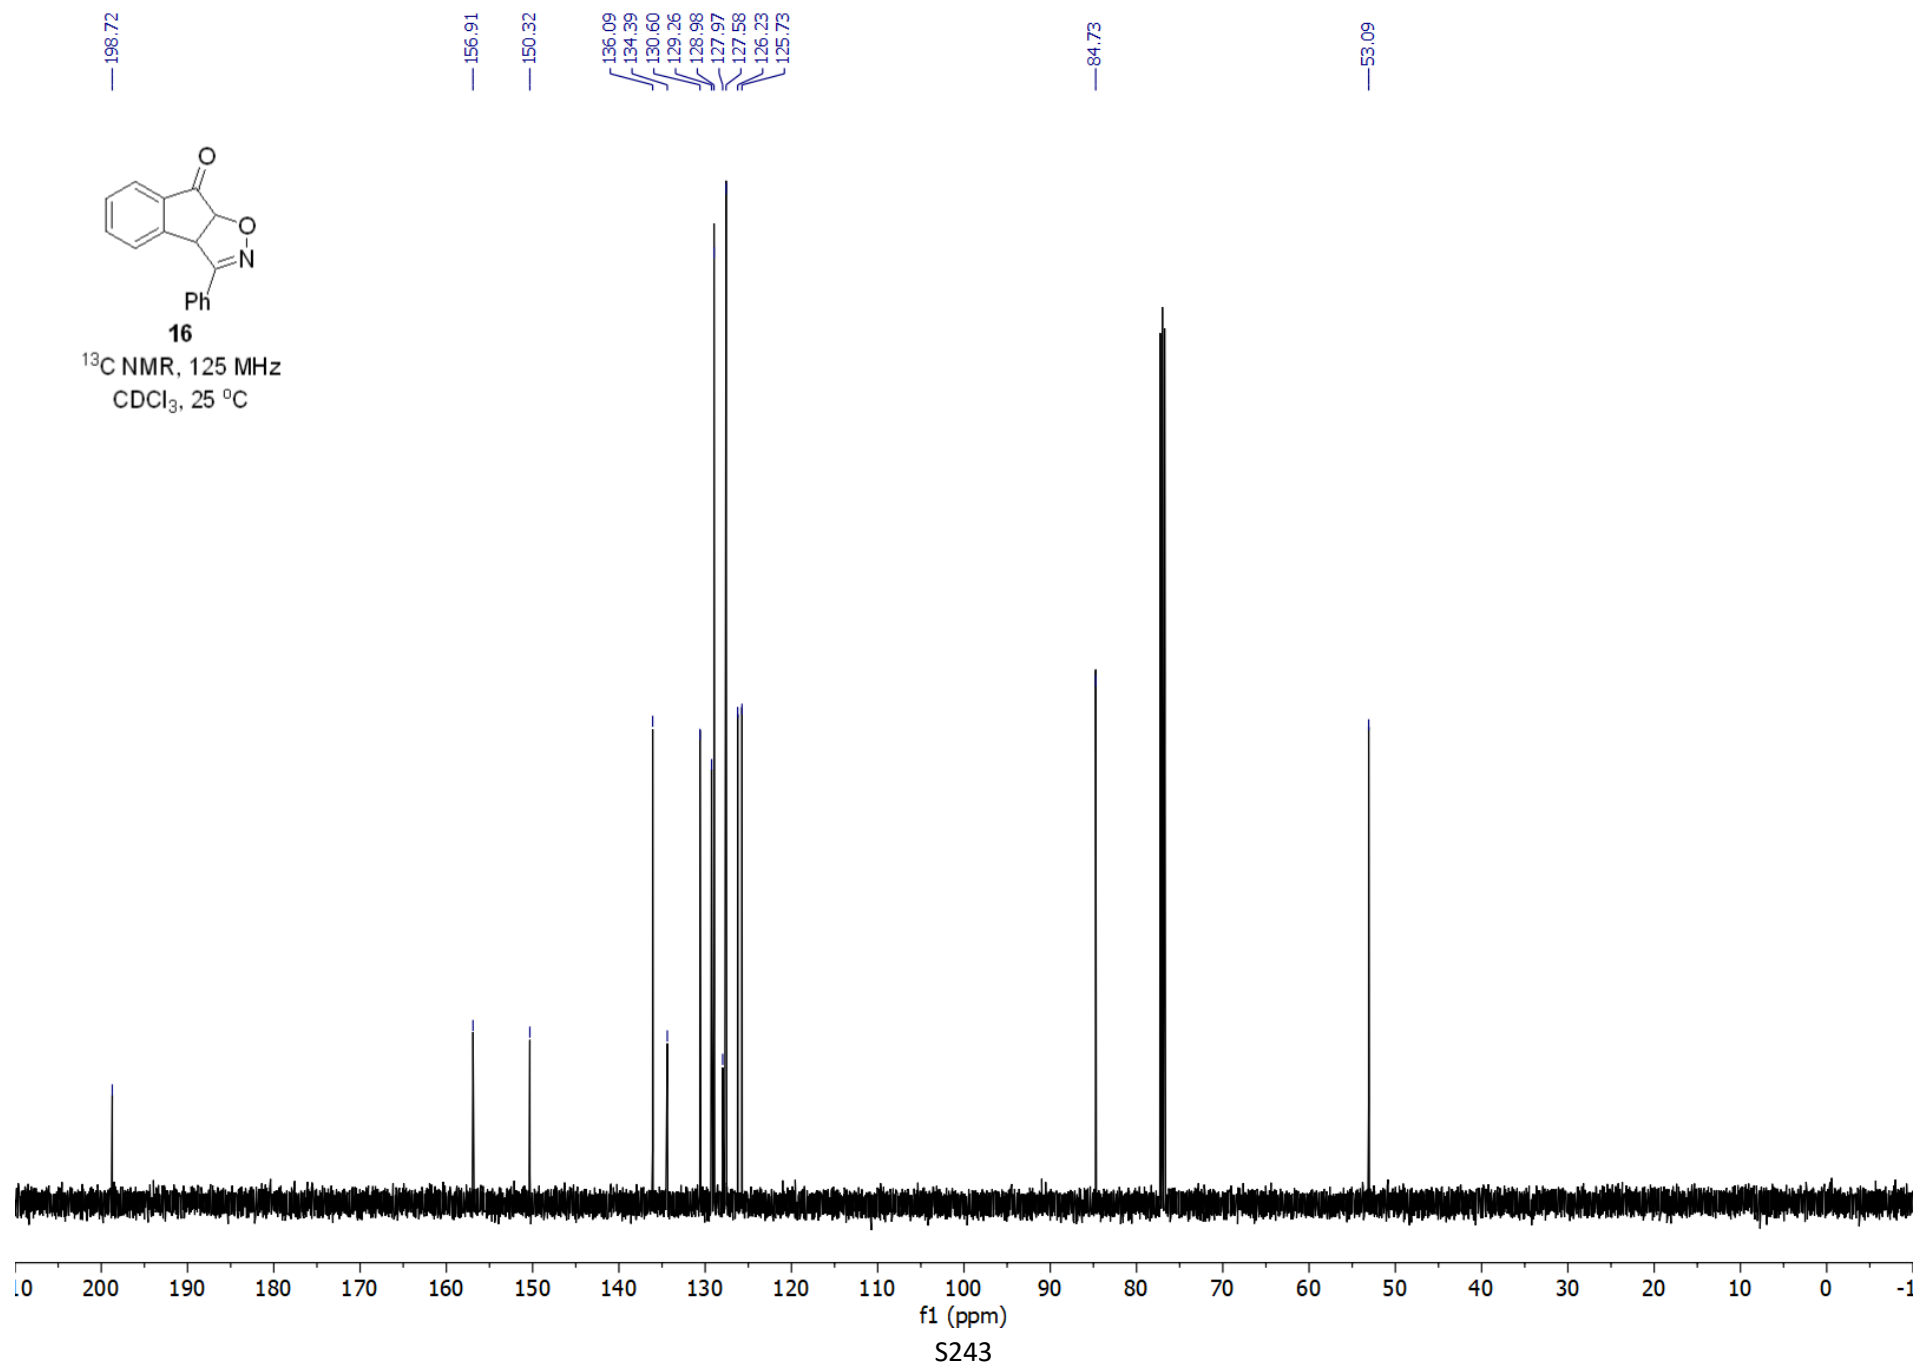

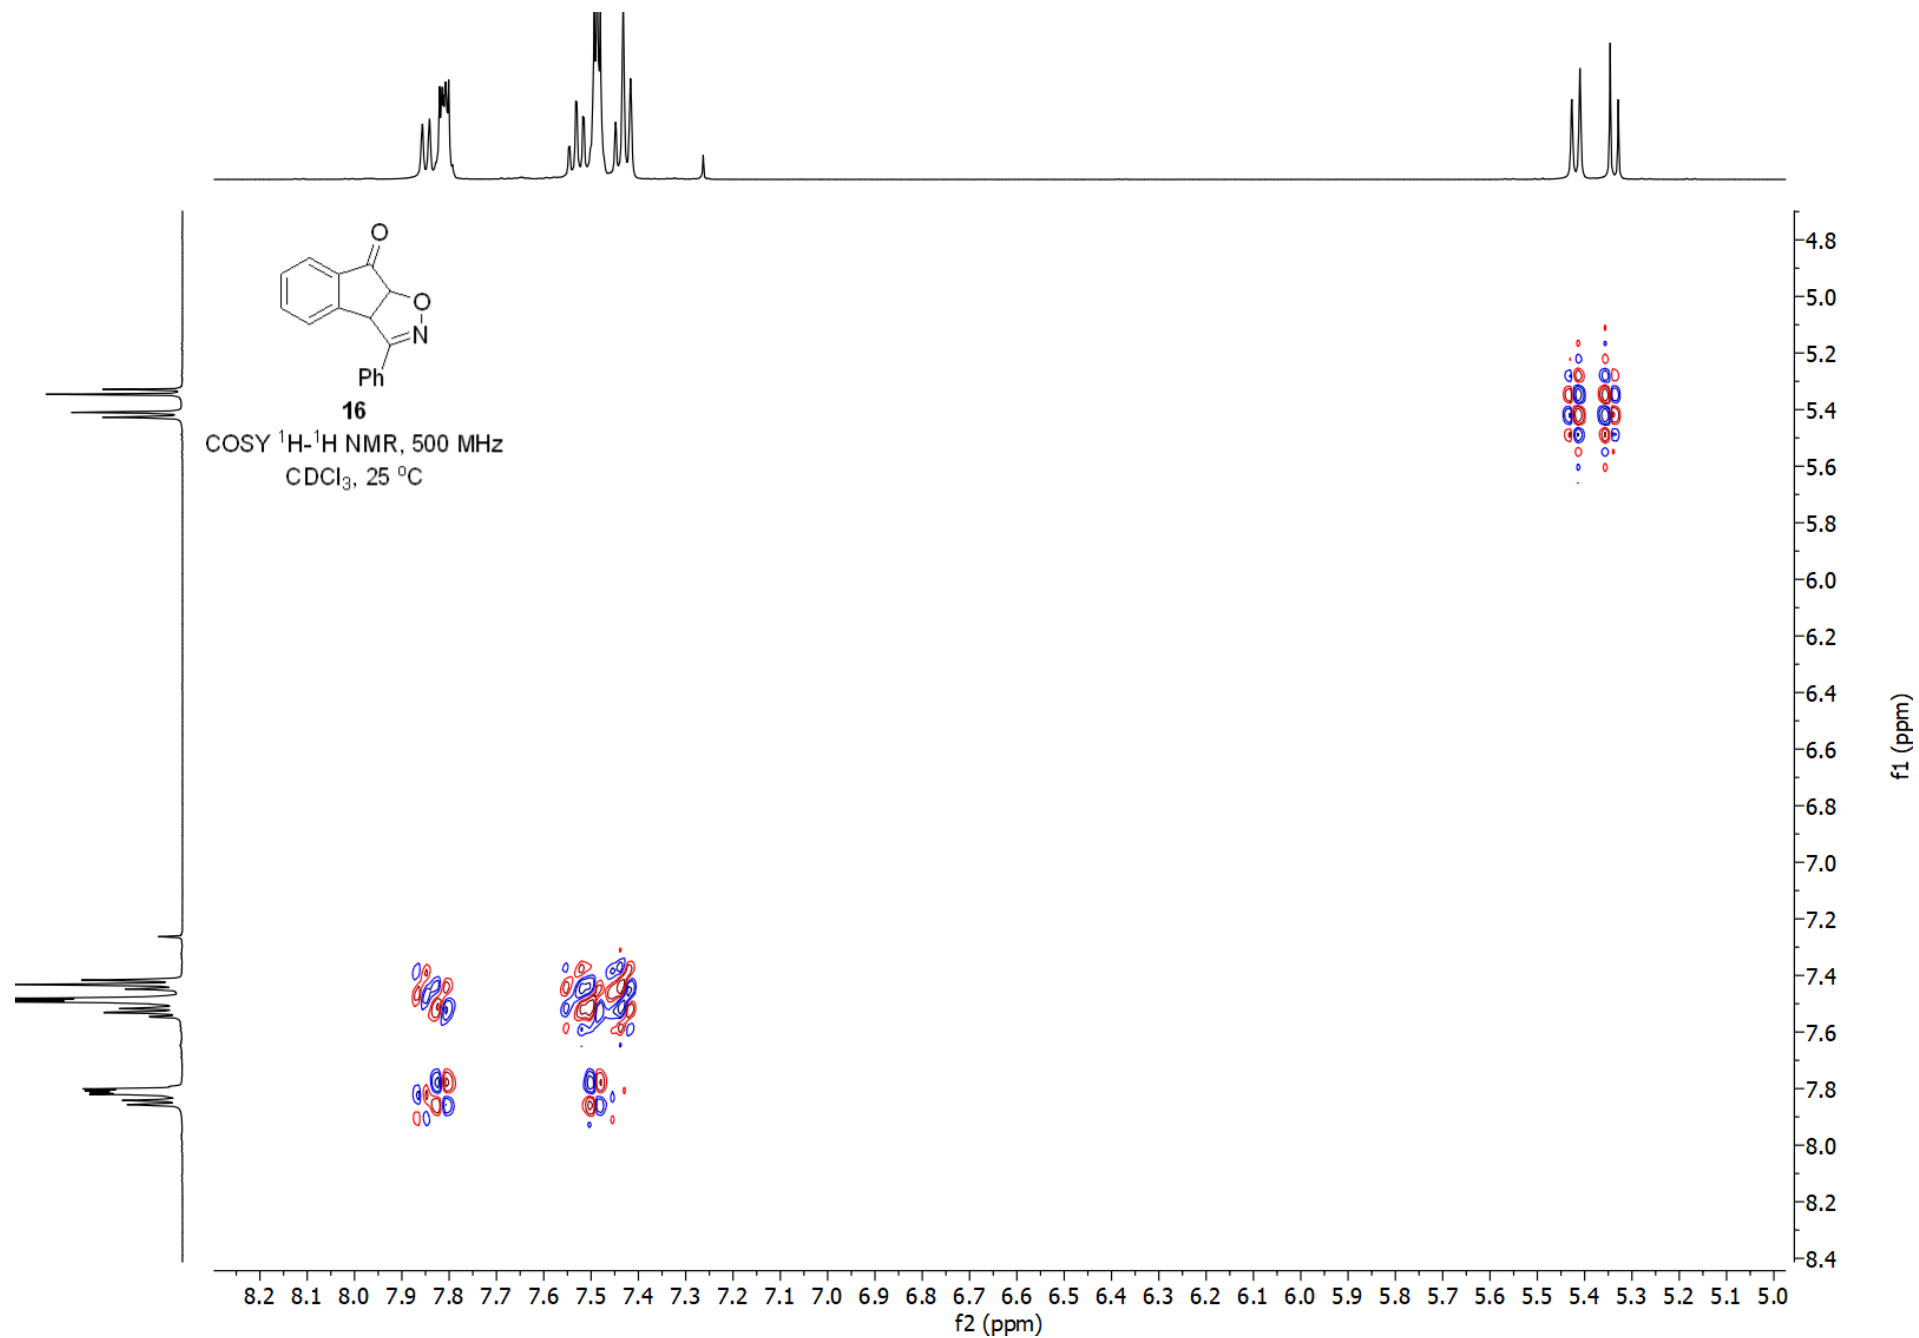

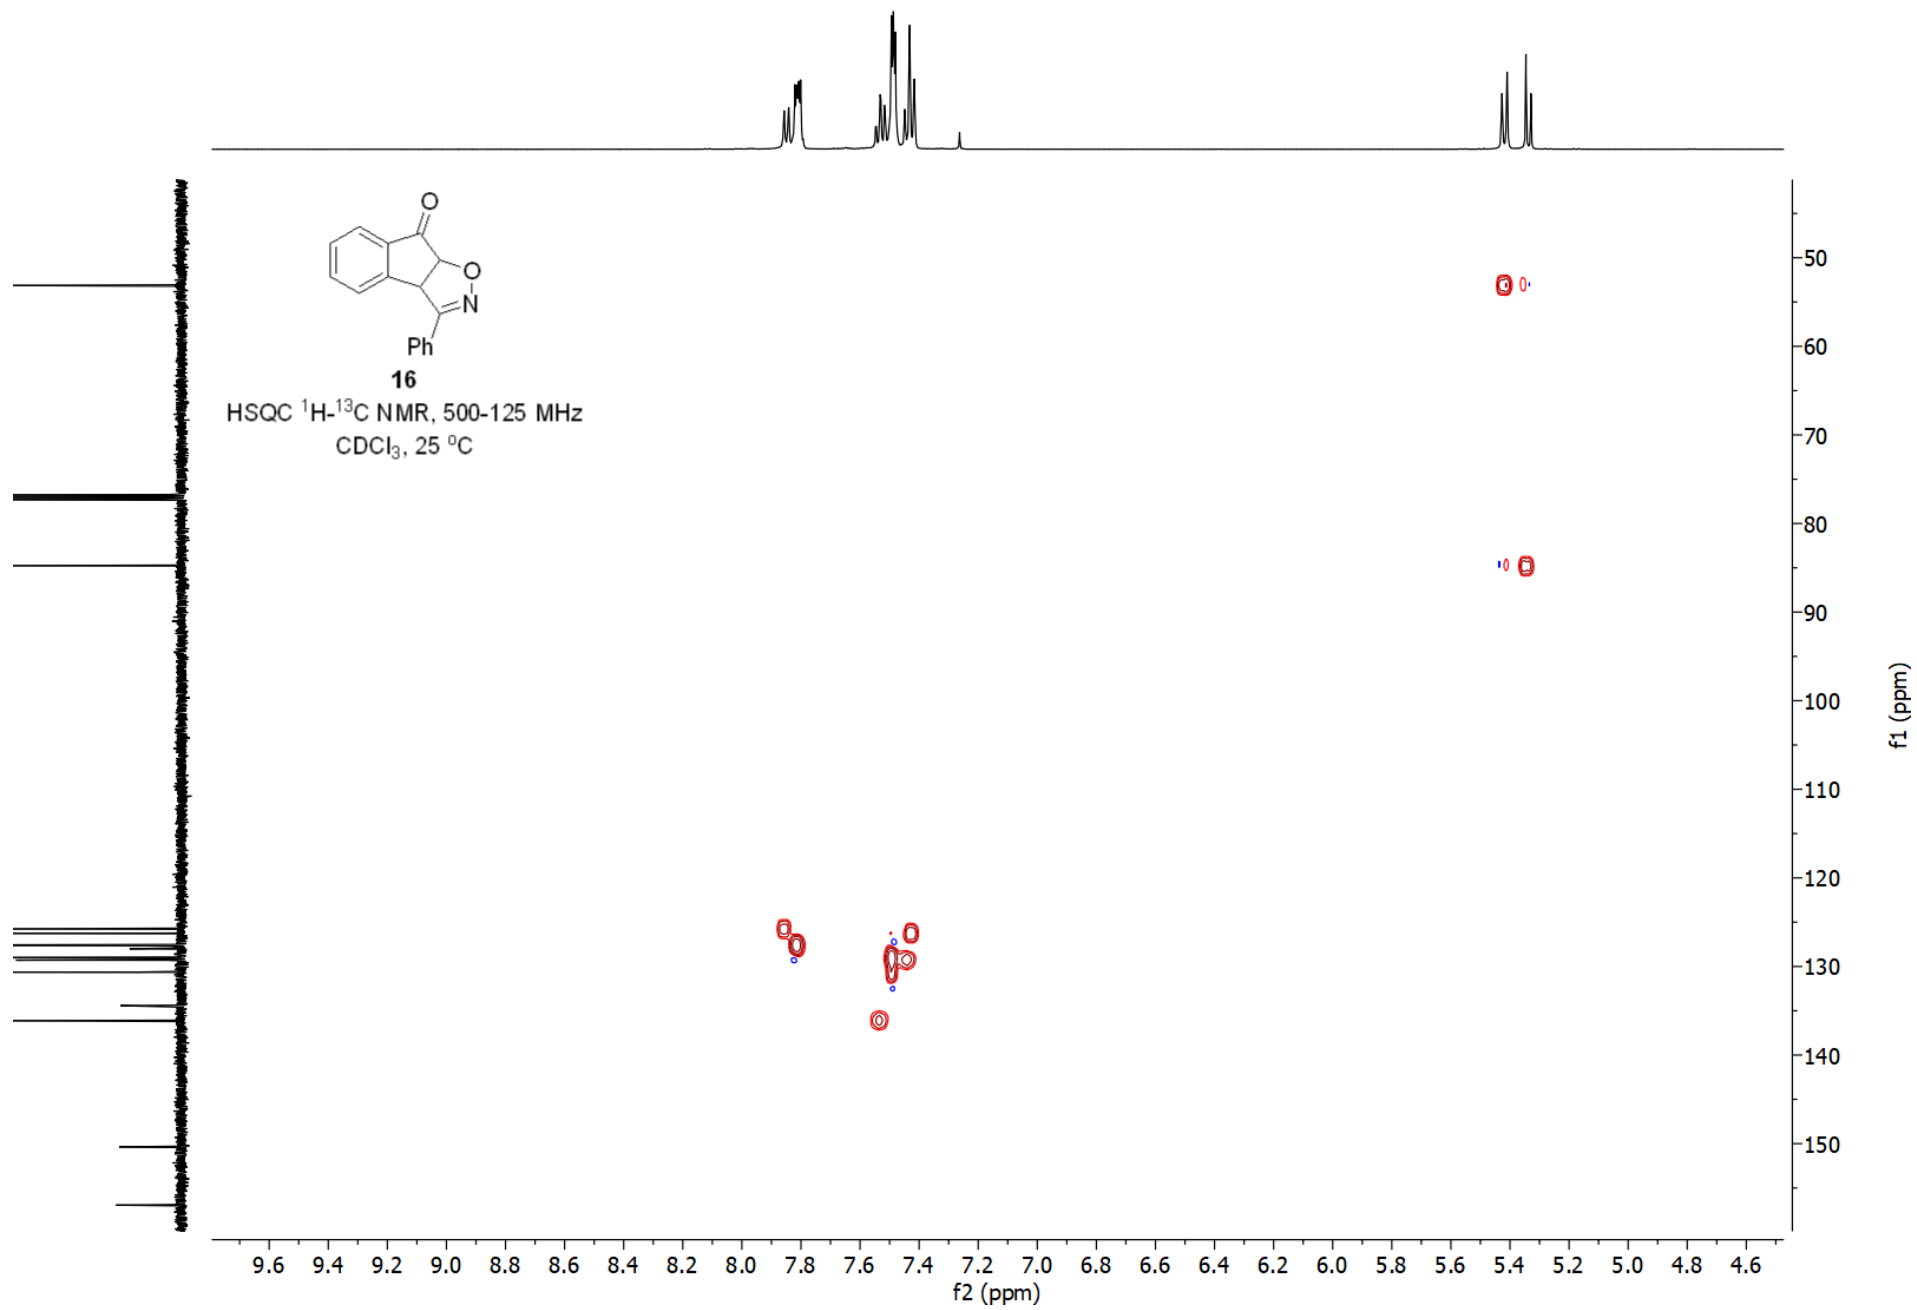

S245

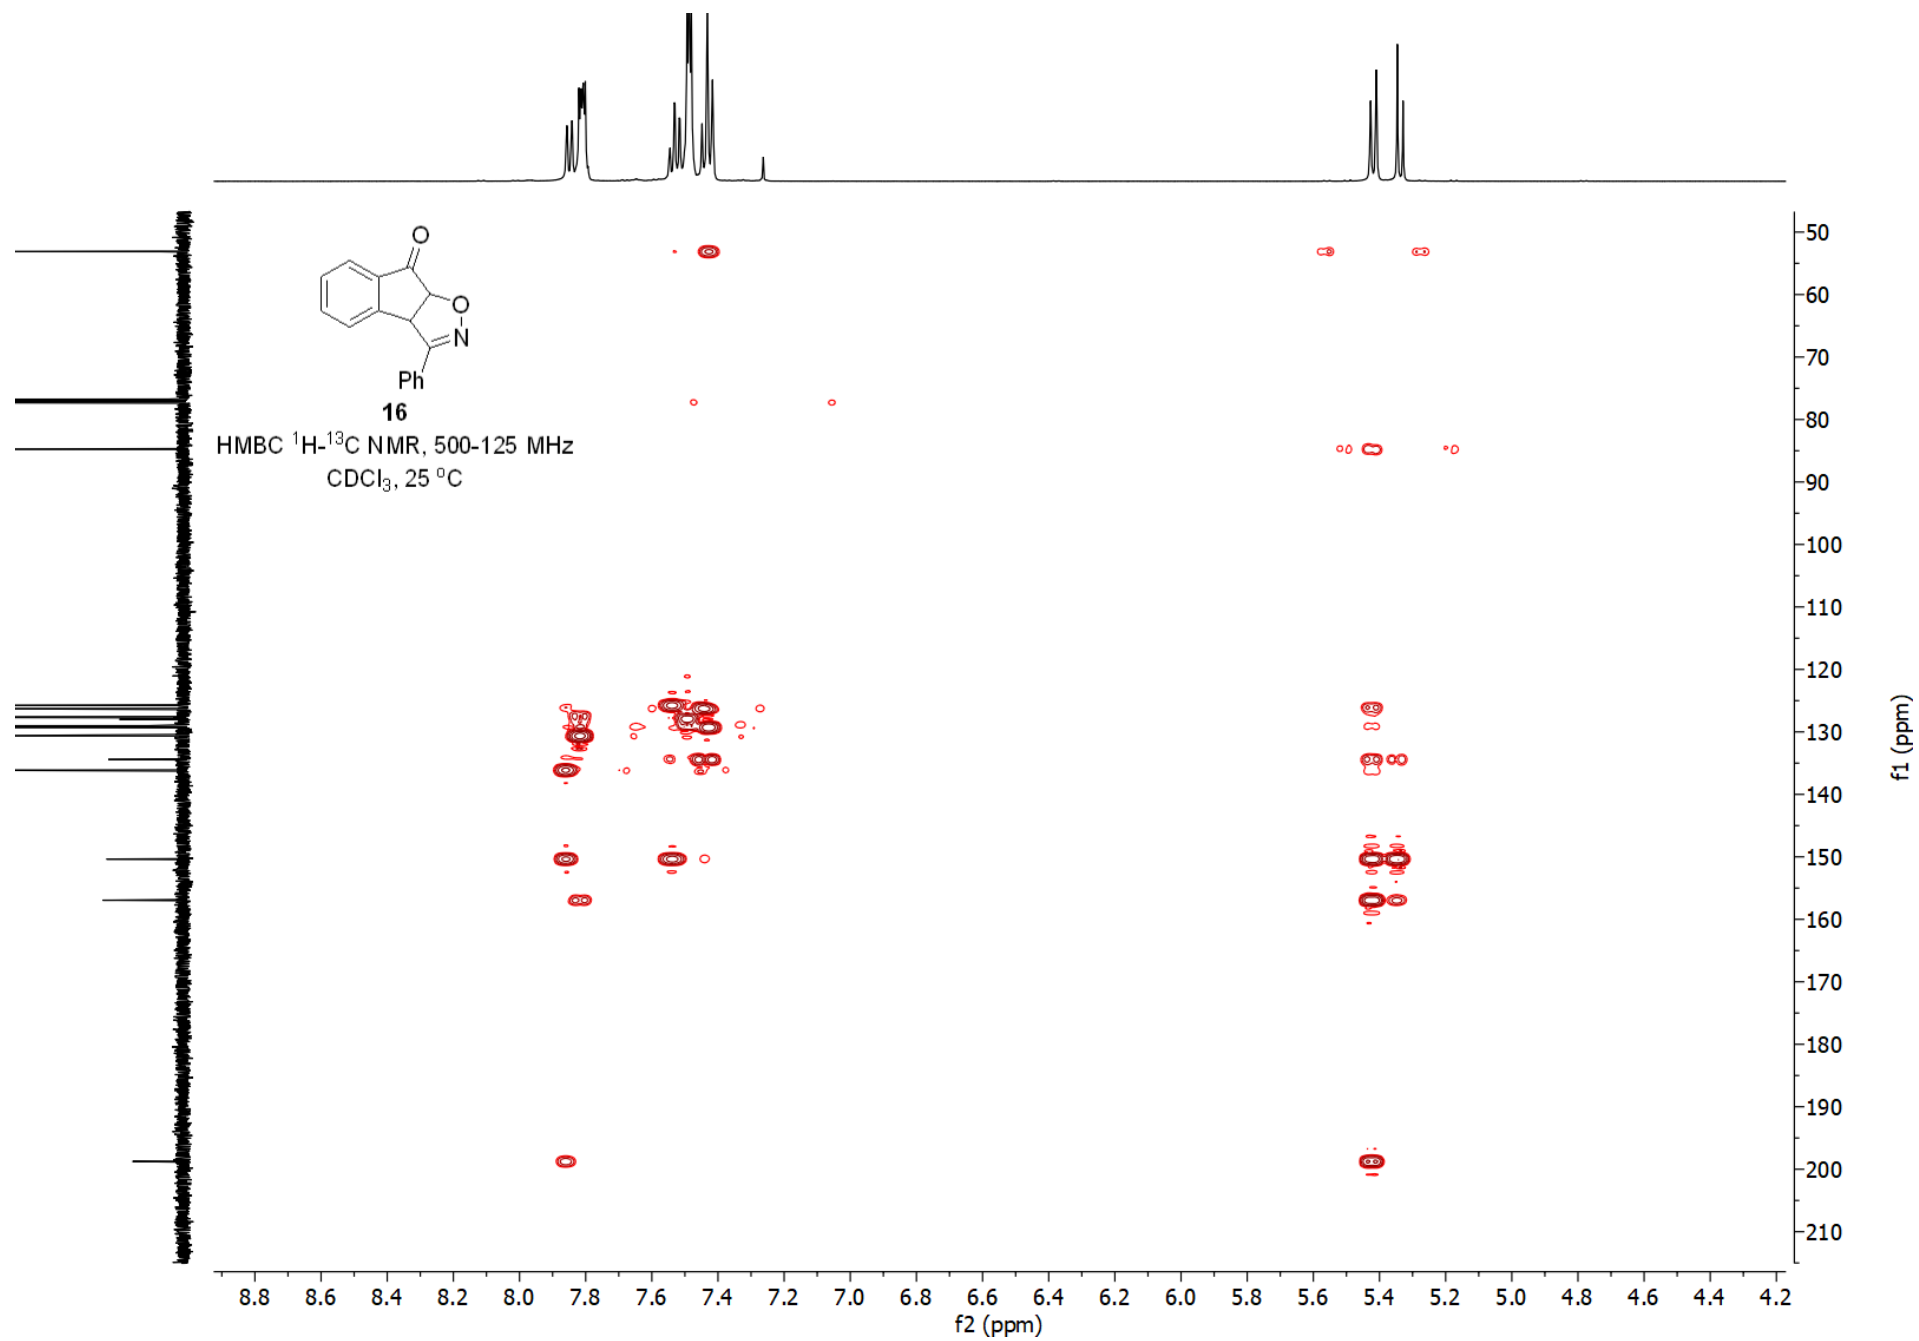

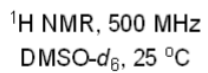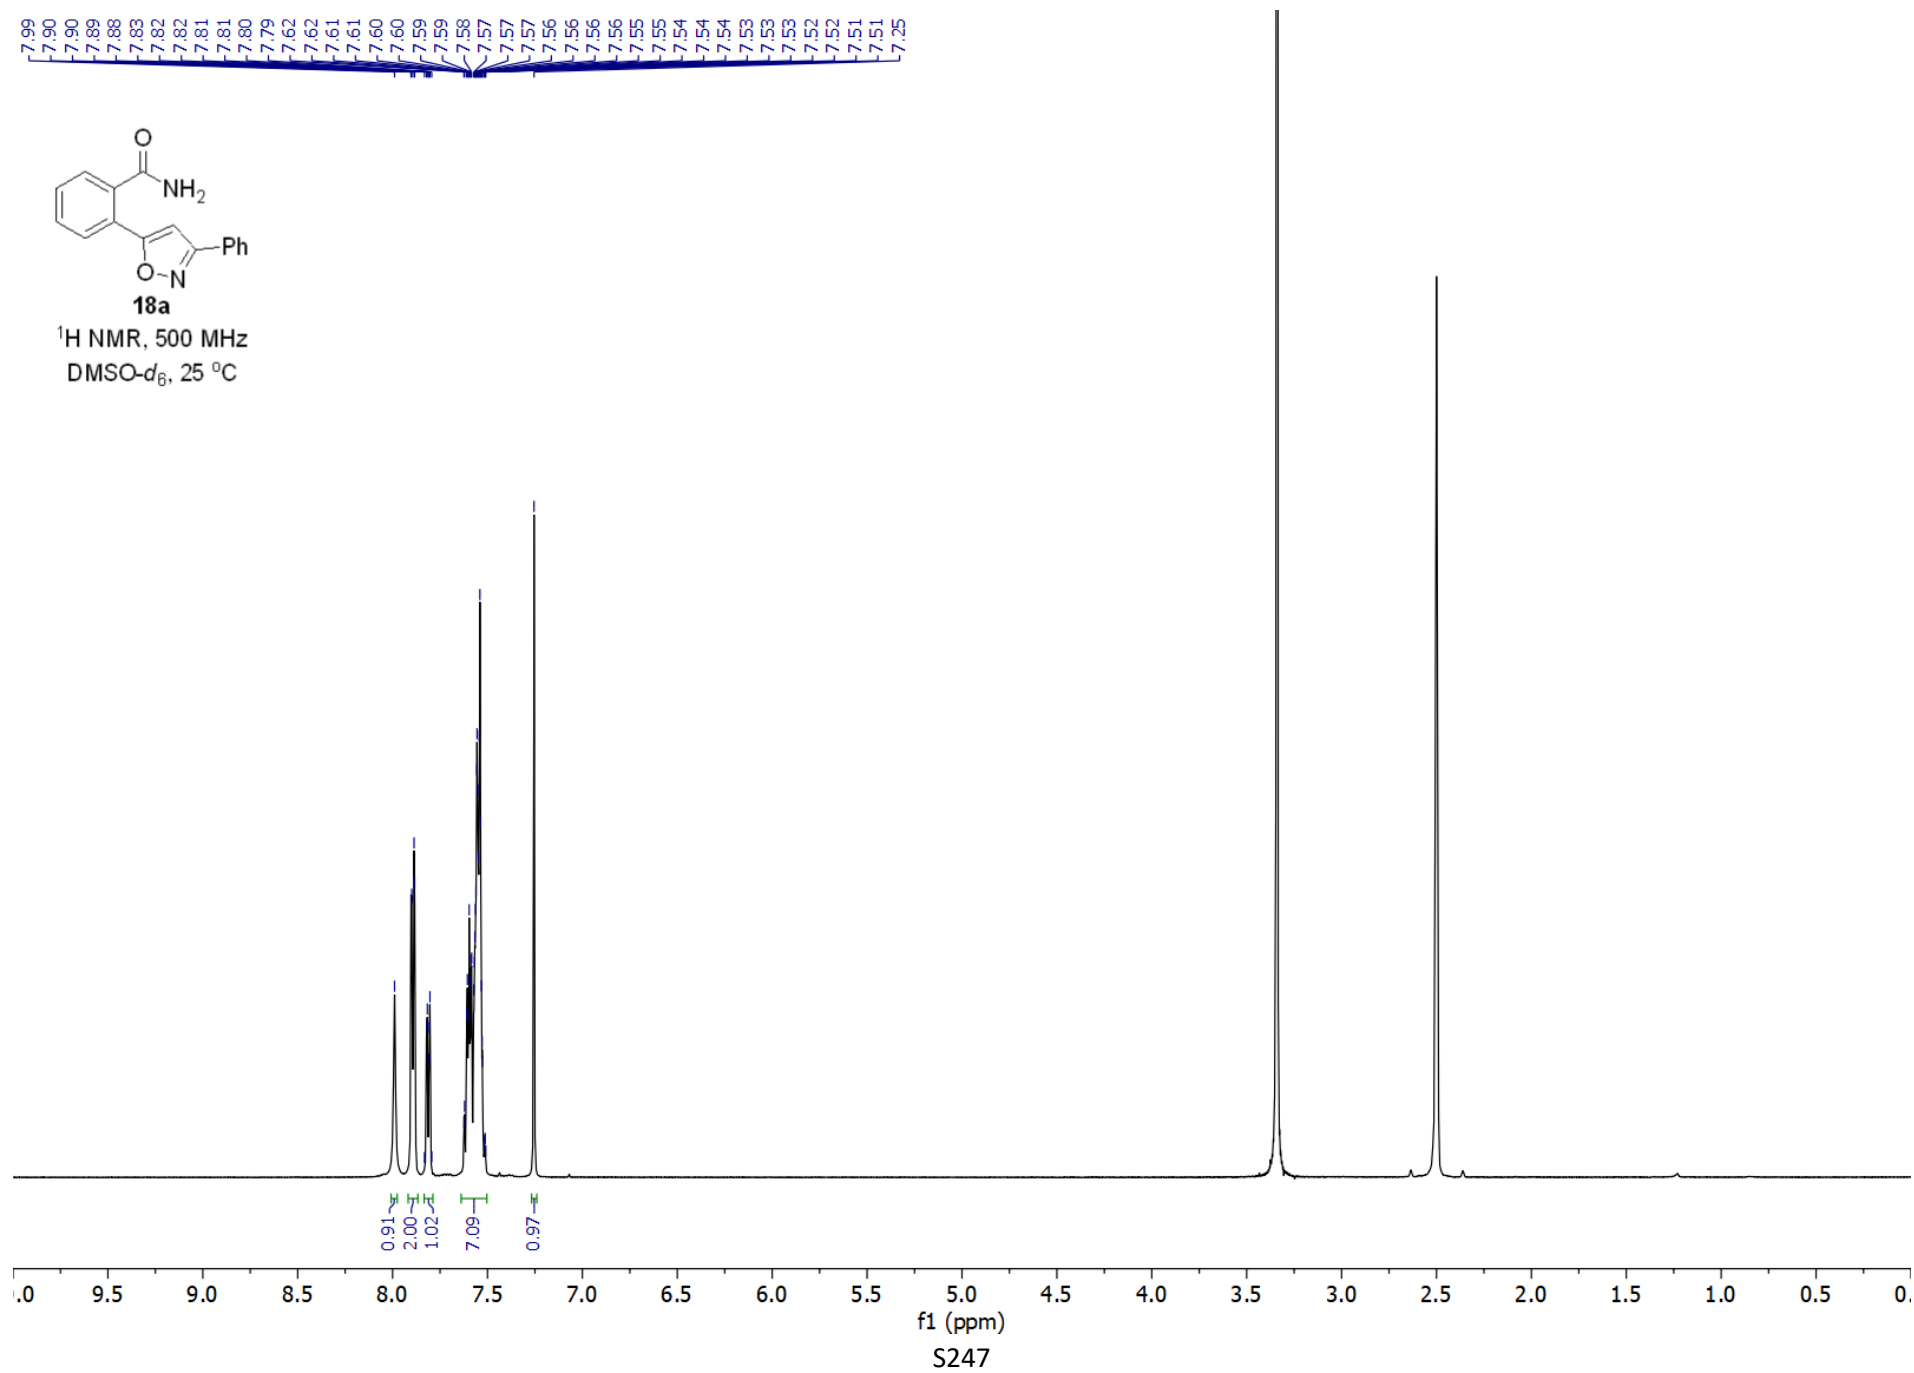

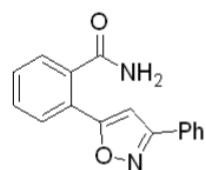

**18a**

$^{13}\text{C}$  NMR, 125 MHz  
DMSO- $d_6$ , 25 °C

170.65  
169.80

162.61

137.46  
130.78  
130.75  
130.05  
129.70  
129.02  
128.89  
128.32  
127.03  
124.67

101.13

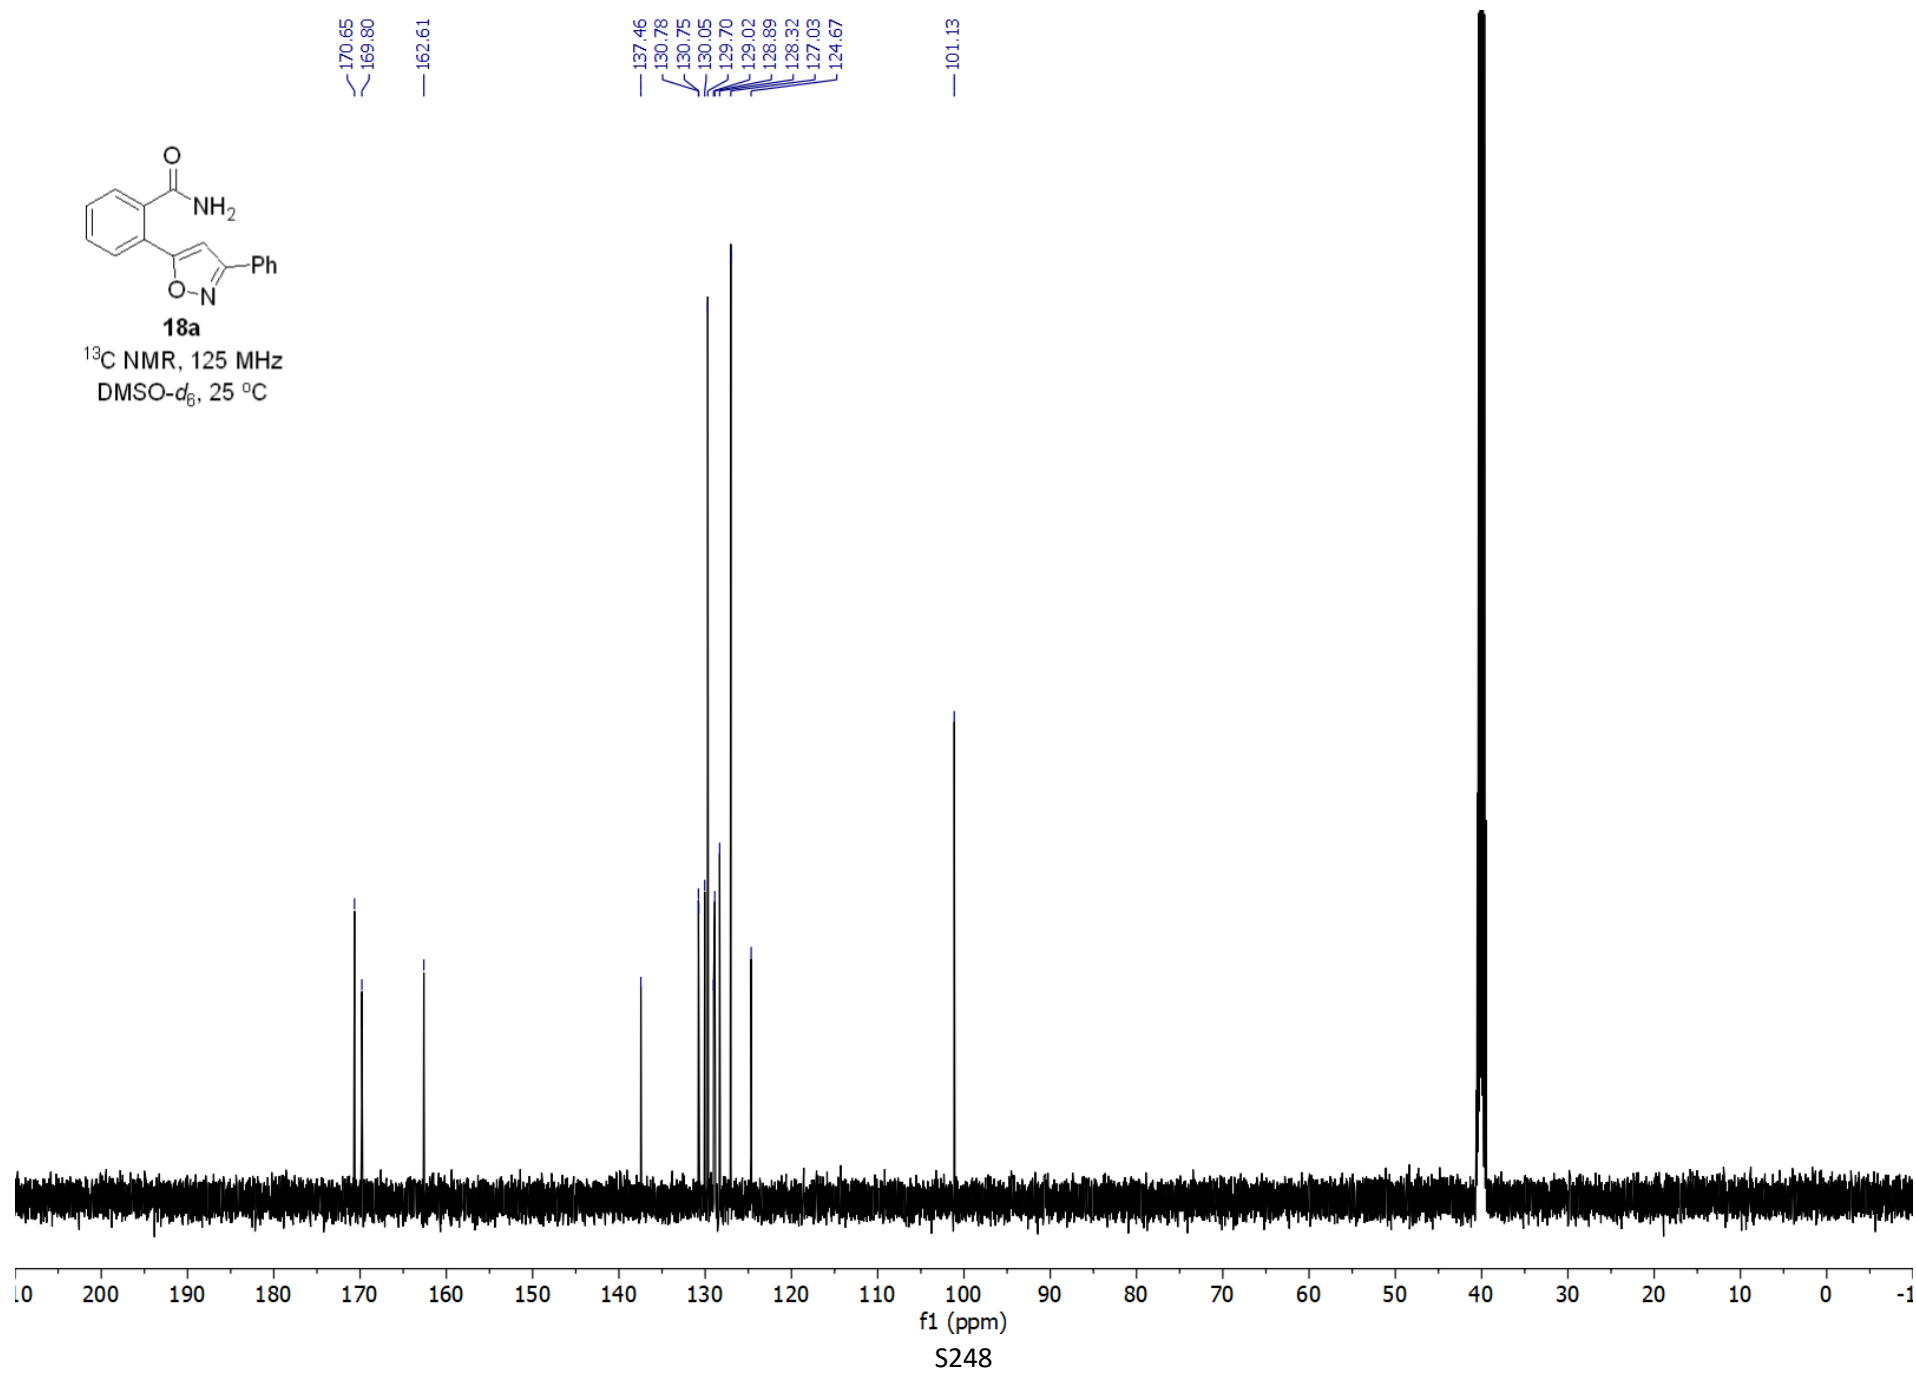

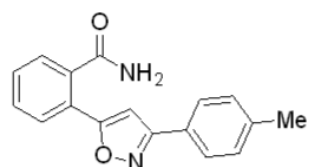

**18b**

<sup>1</sup>H NMR, 500 MHz  
DMSO-*d*<sub>6</sub>, 25 °C

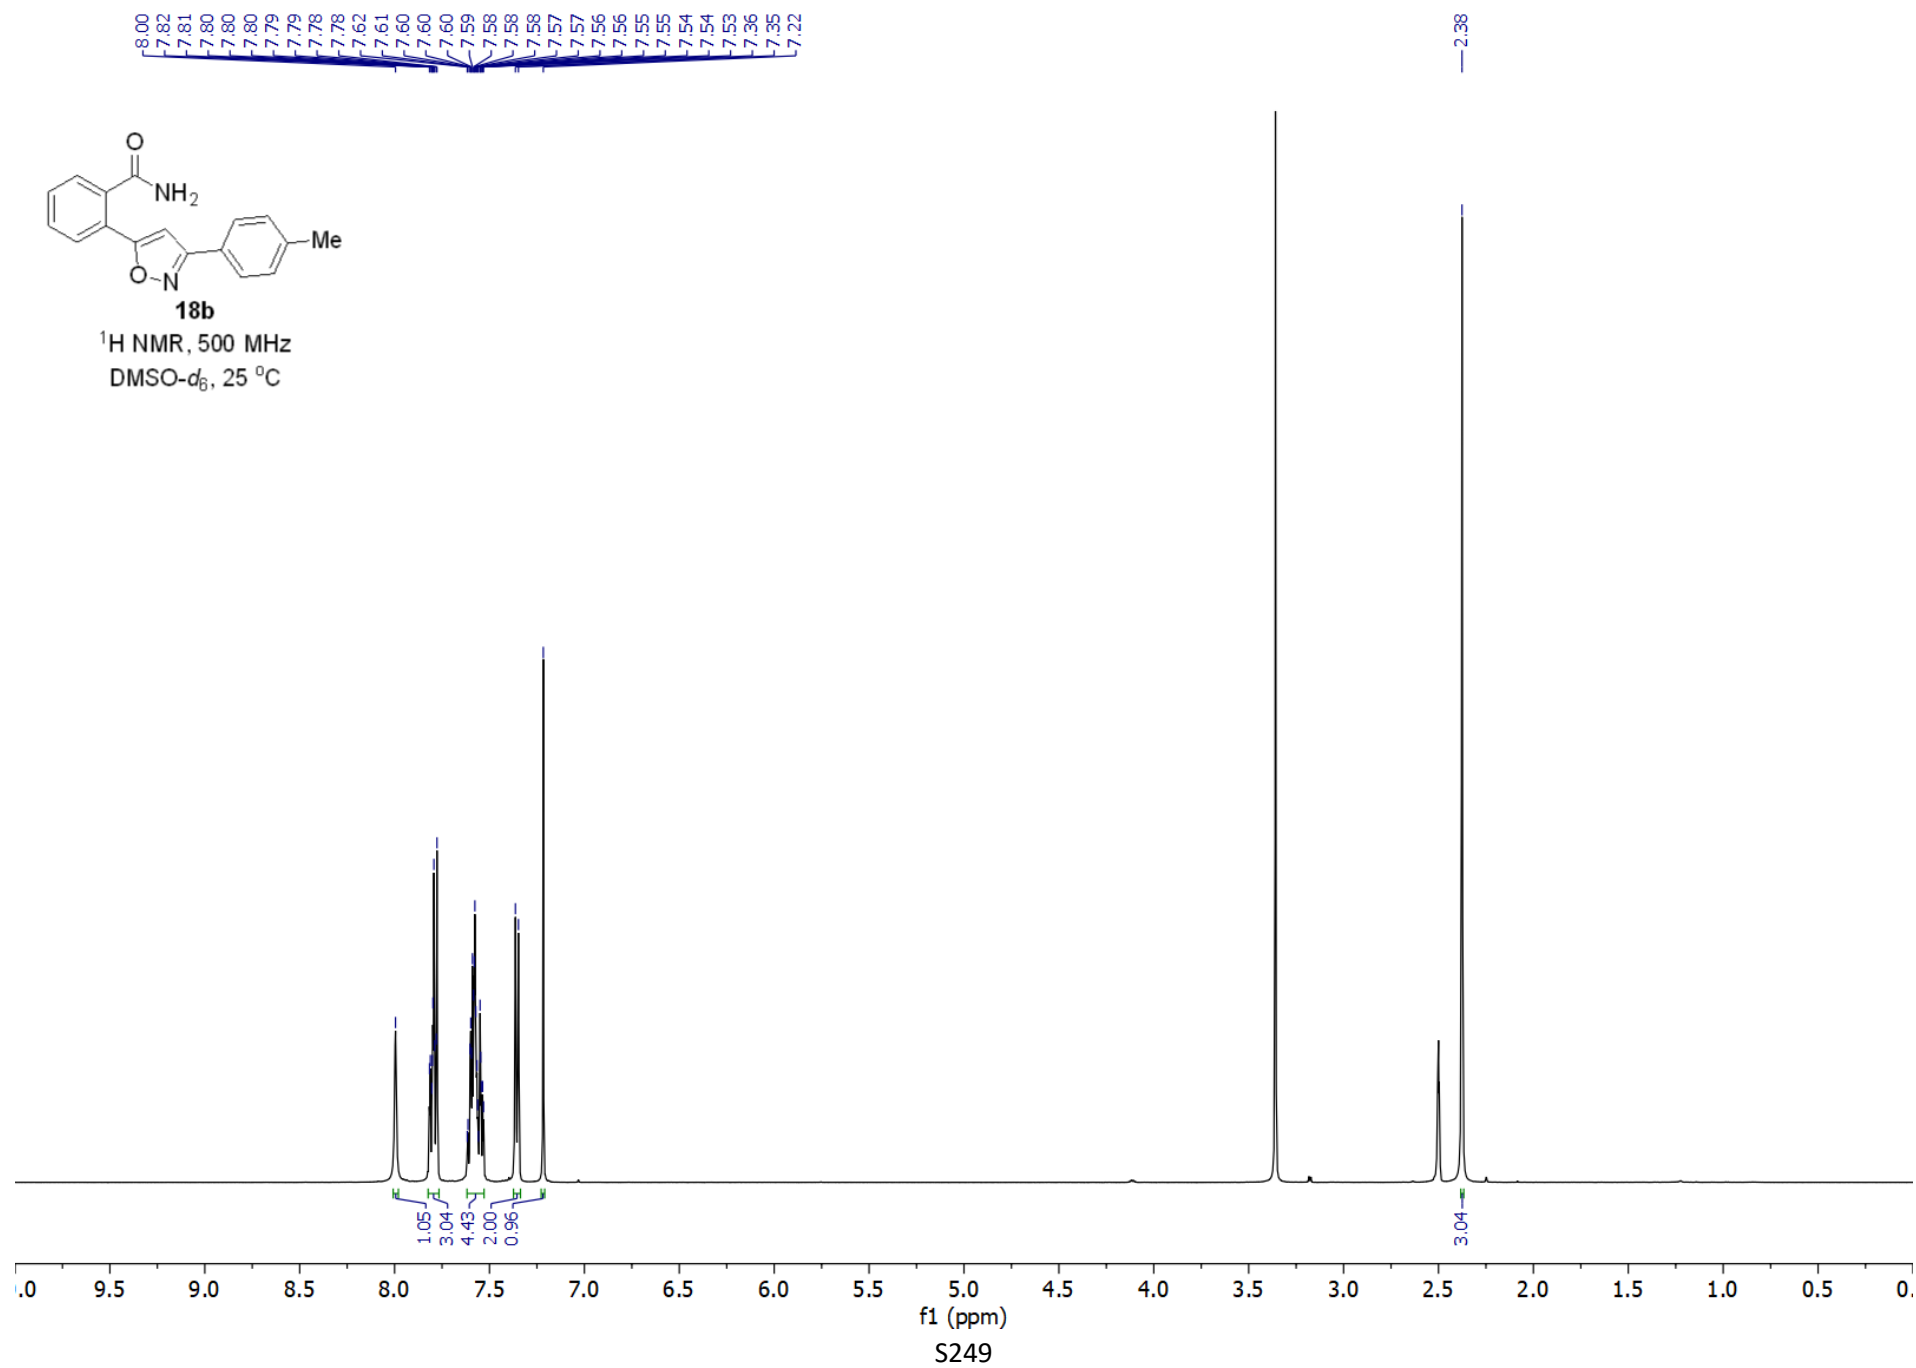

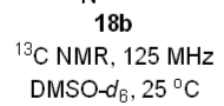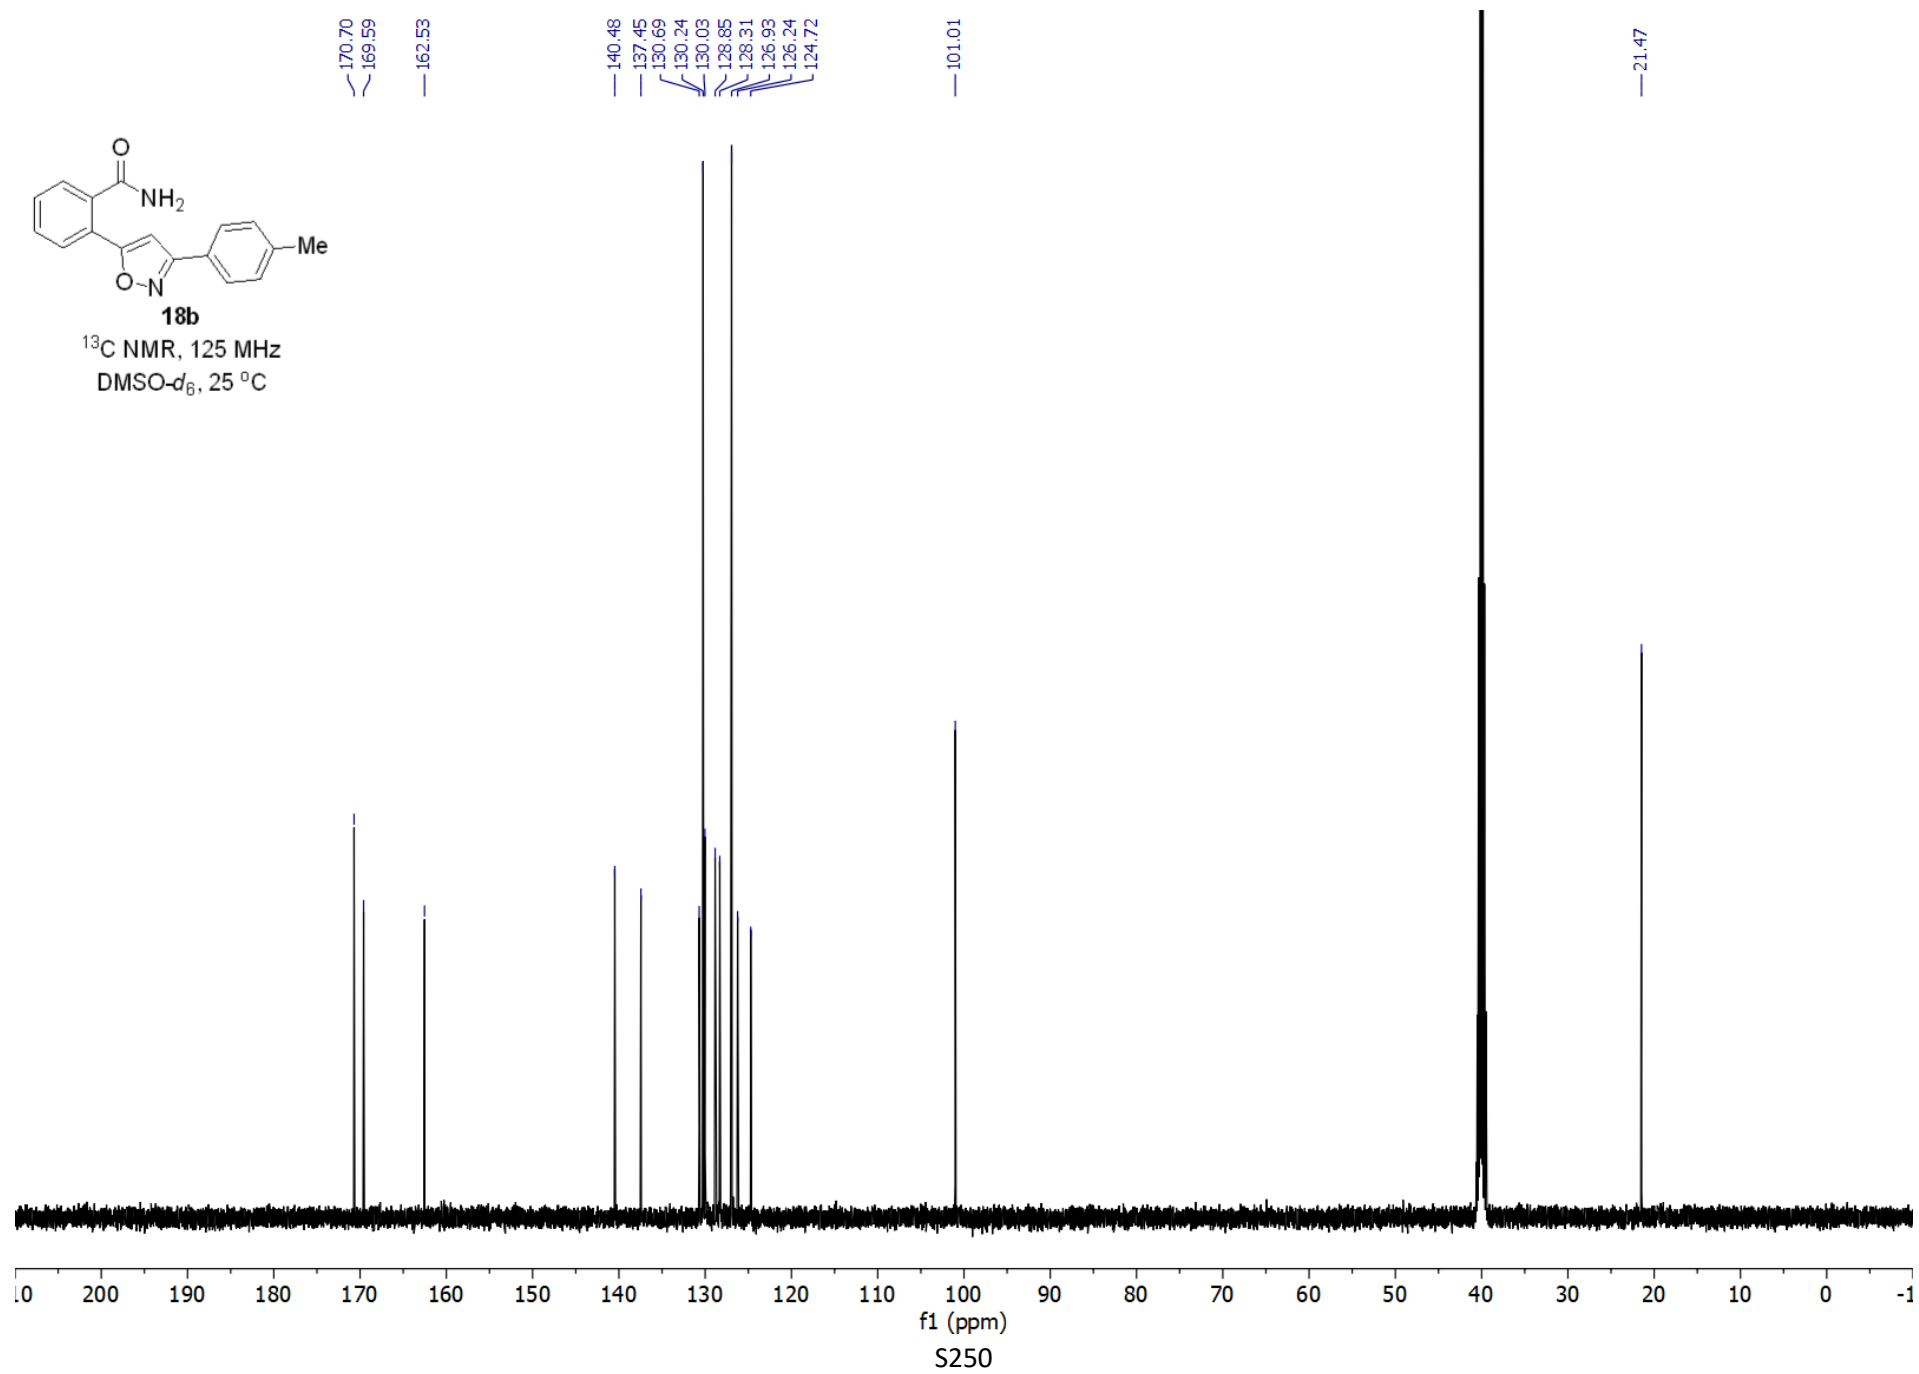

7.98  
7.84  
7.82  
7.81  
7.80  
7.79  
7.79  
7.60  
7.60  
7.59  
7.59  
7.58  
7.58  
7.57  
7.57  
7.56  
7.56  
7.54  
7.54  
7.54  
7.53  
7.53  
7.19  
7.11  
7.09

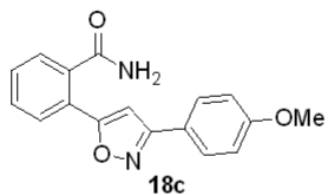

$^1\text{H}$  NMR, 500 MHz  
DMSO- $d_6$ , 25 °C

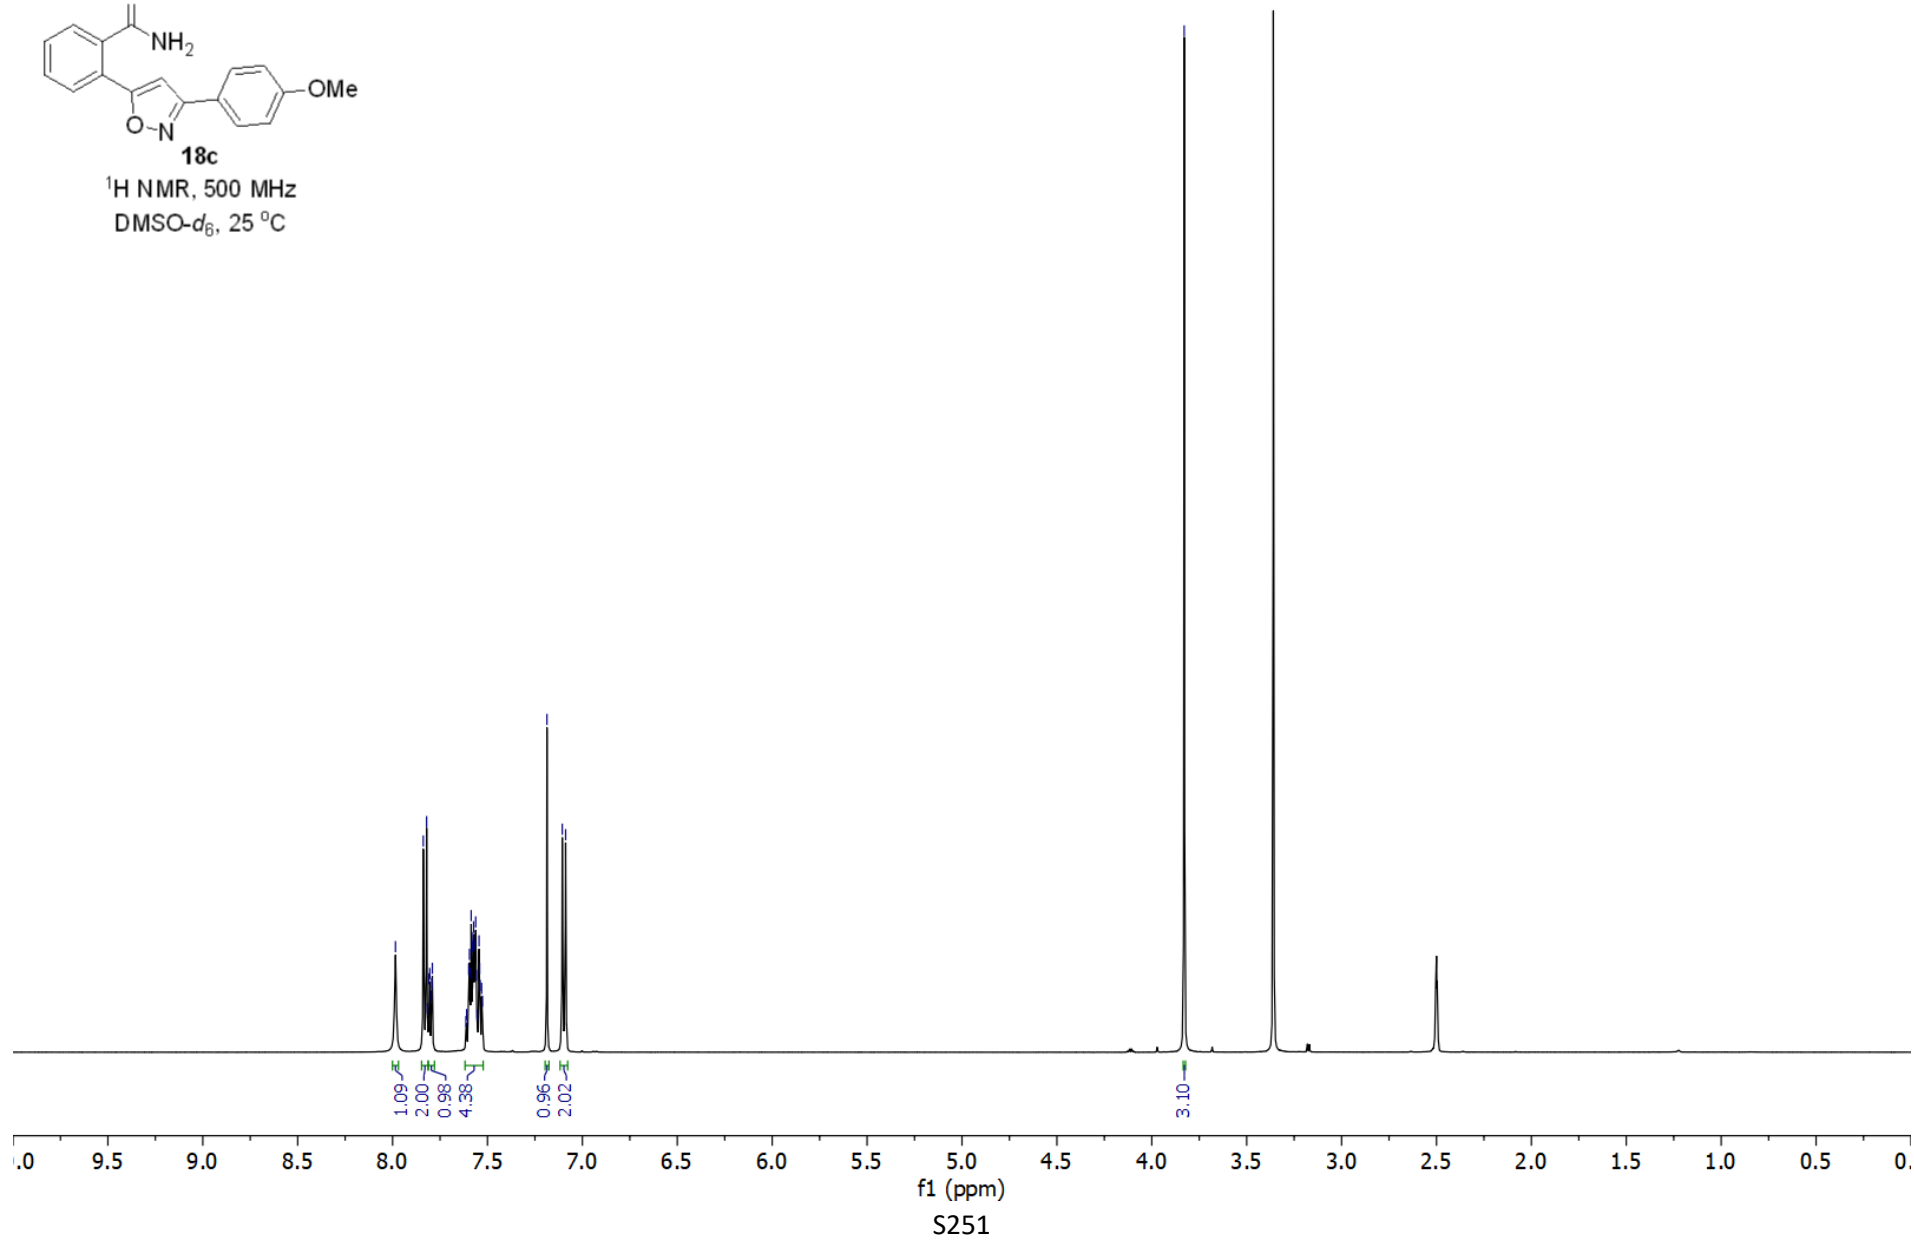

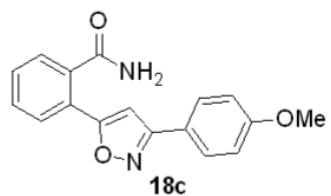

$^{13}\text{C}$  NMR, 125 MHz  
DMSO- $d_6$ , 25 °C

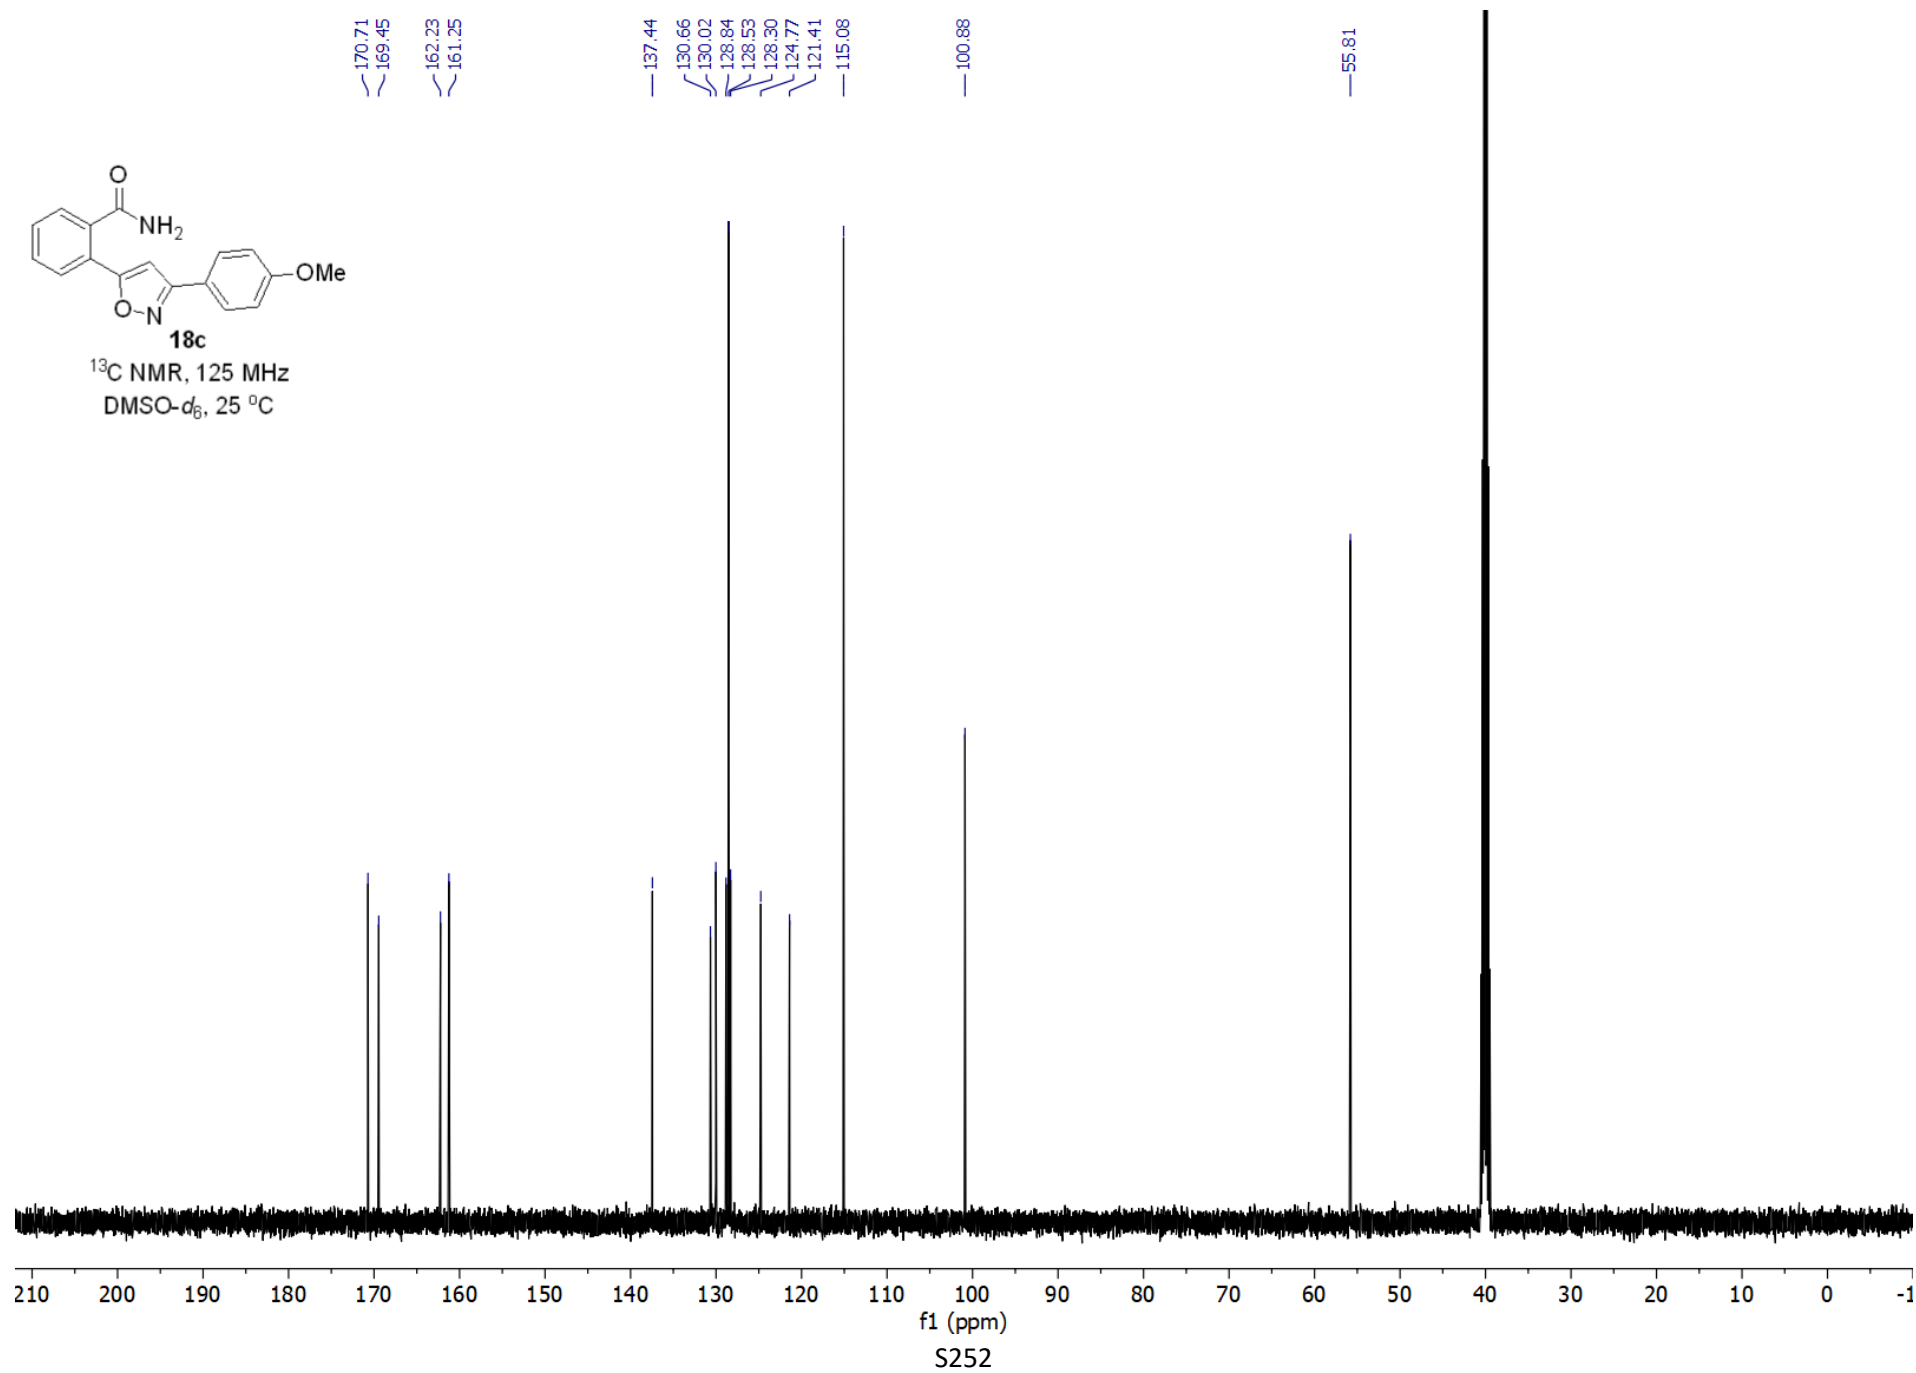

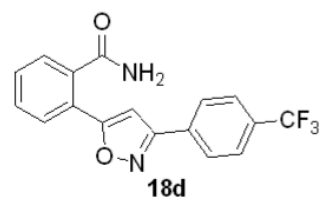

<sup>1</sup>H NMR, 500 MHz  
DMSO-*d*<sub>6</sub>, 25 °C

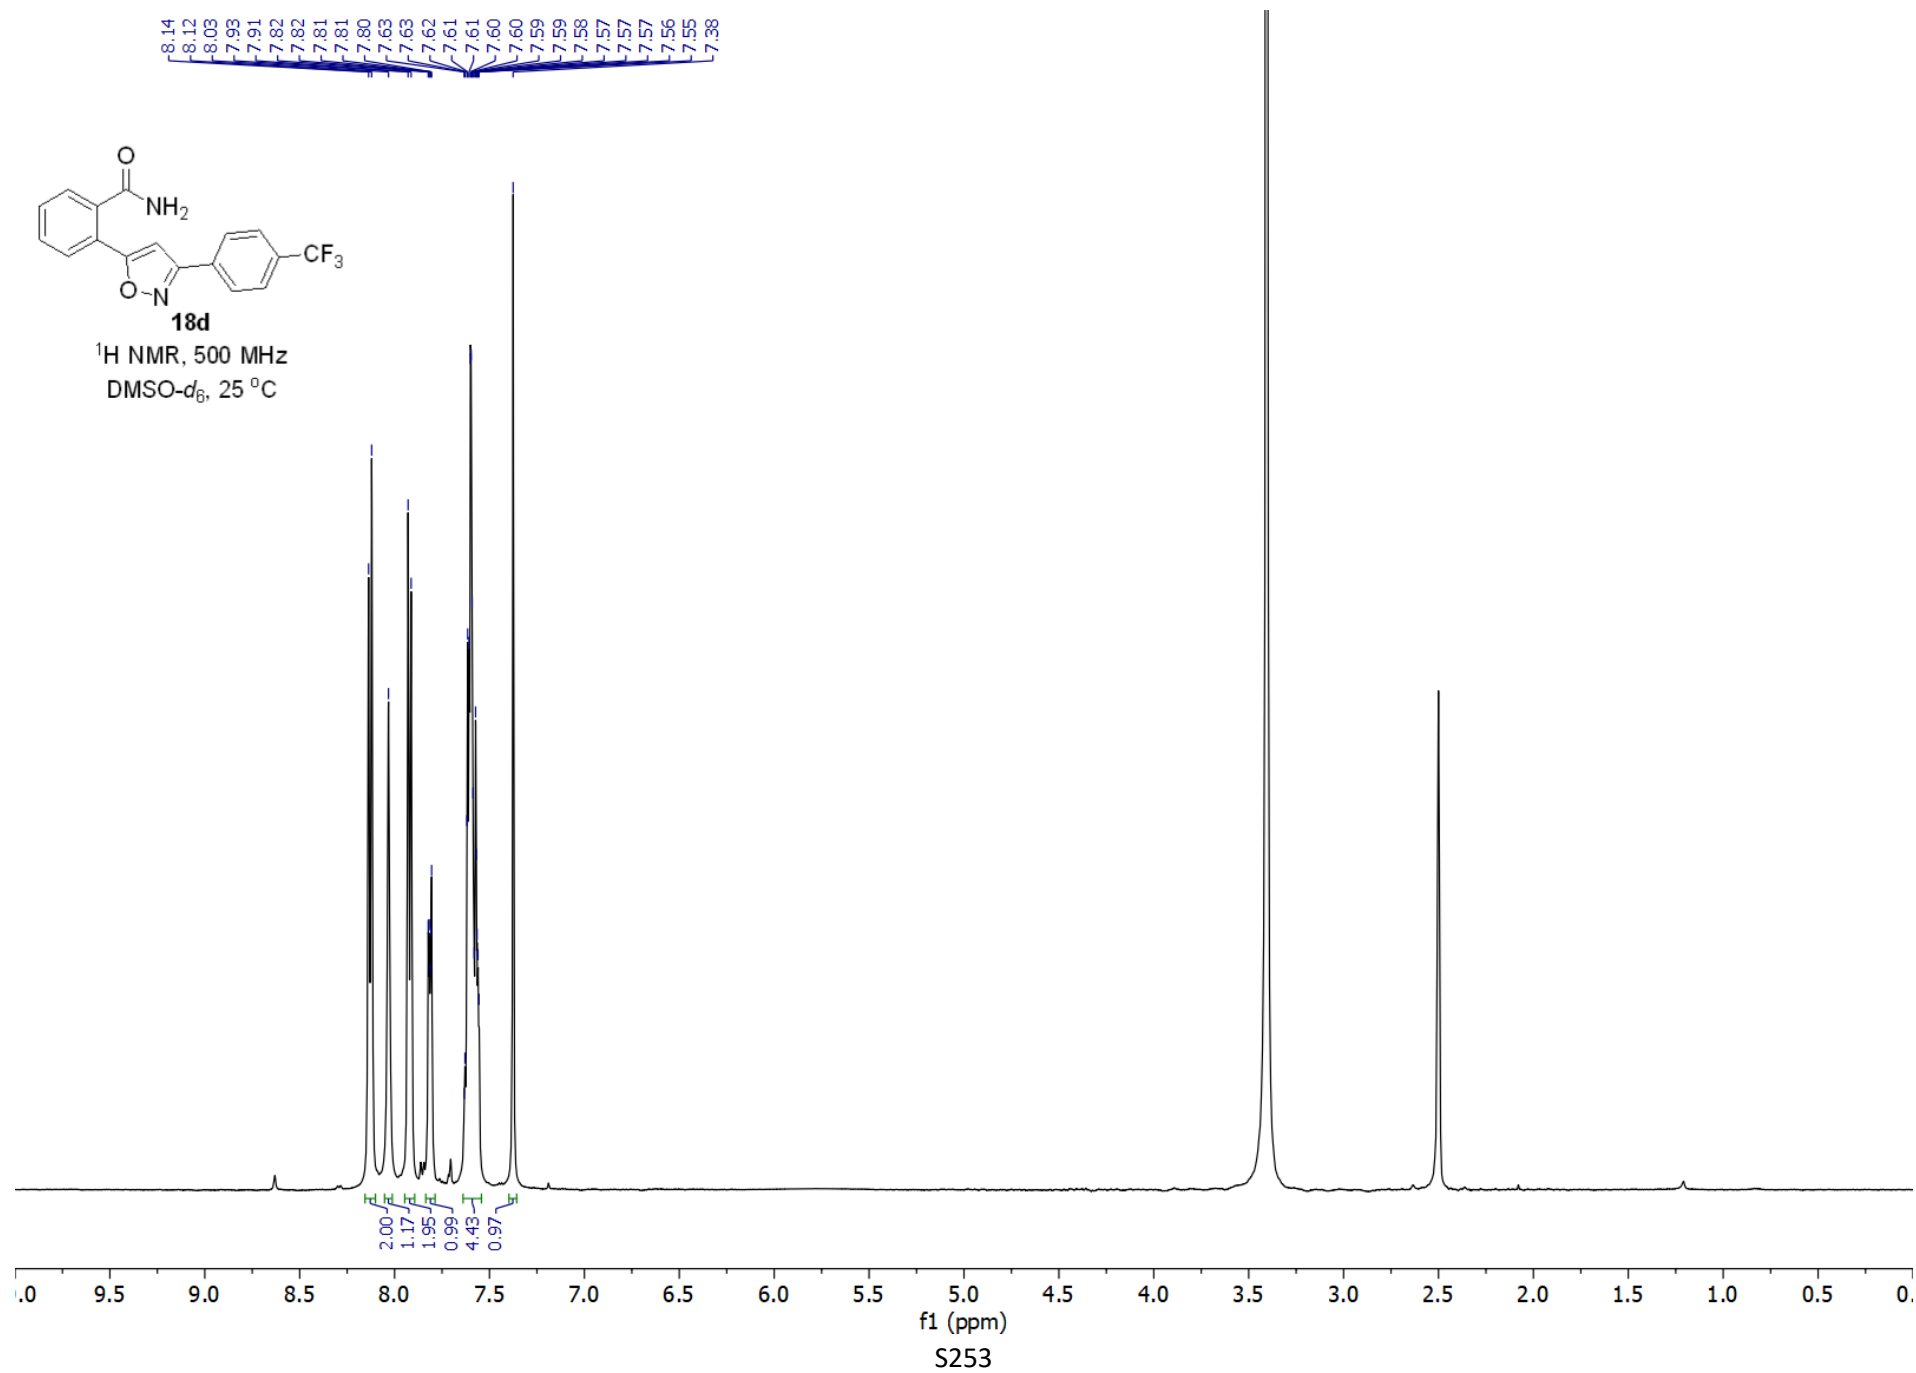

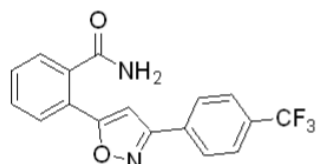

**18d**

$^{13}\text{C}$  NMR, 125 MHz  
DMSO- $d_6$ , 25 °C

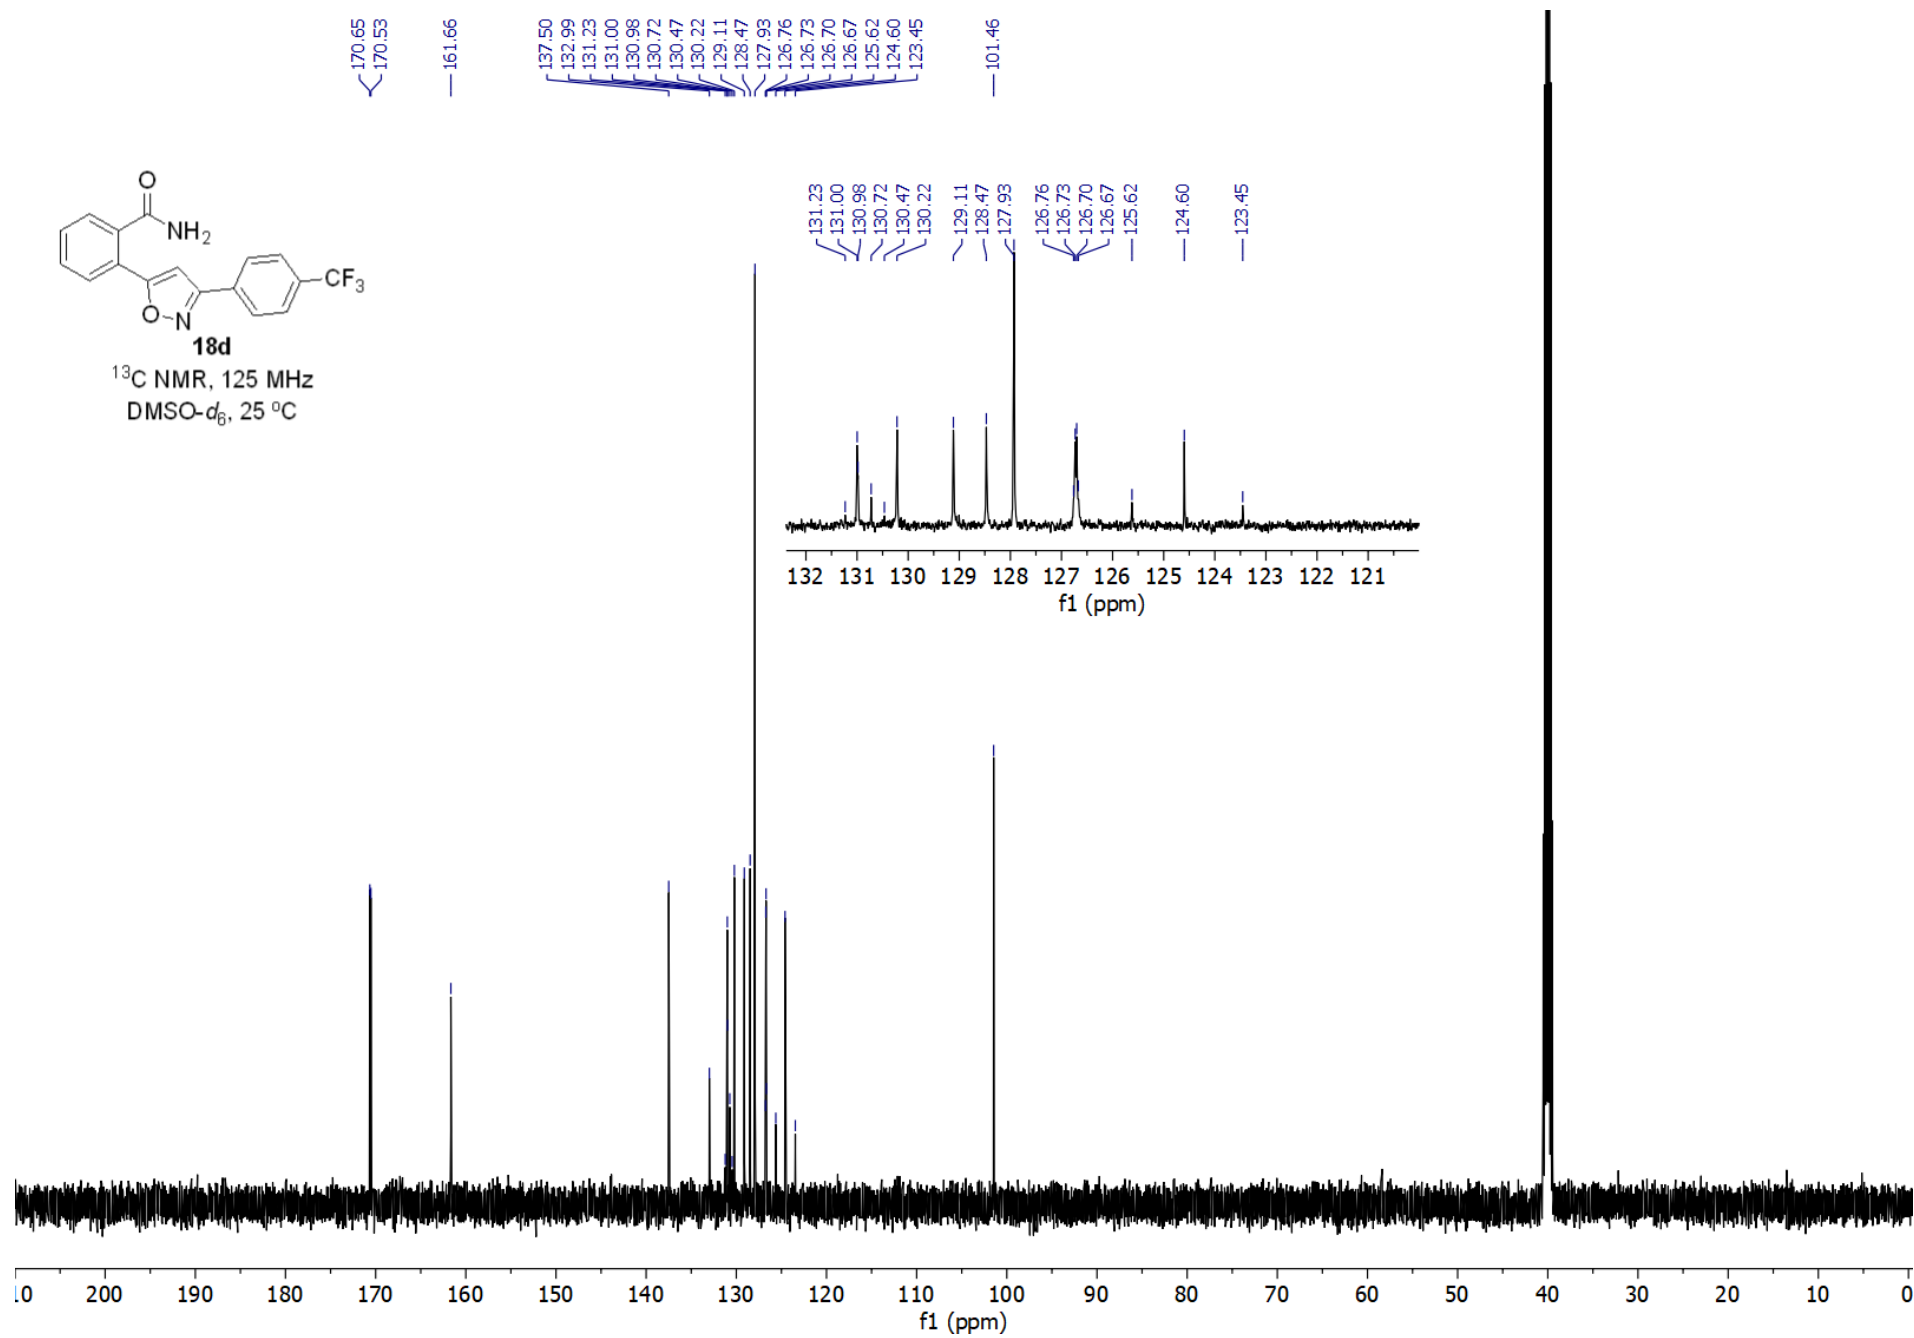

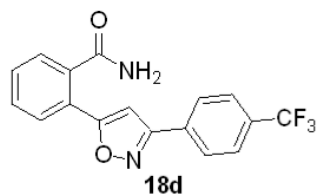

$^{19}\text{F}$  NMR, 470 MHz  
DMSO- $d_6$ , 25 °C

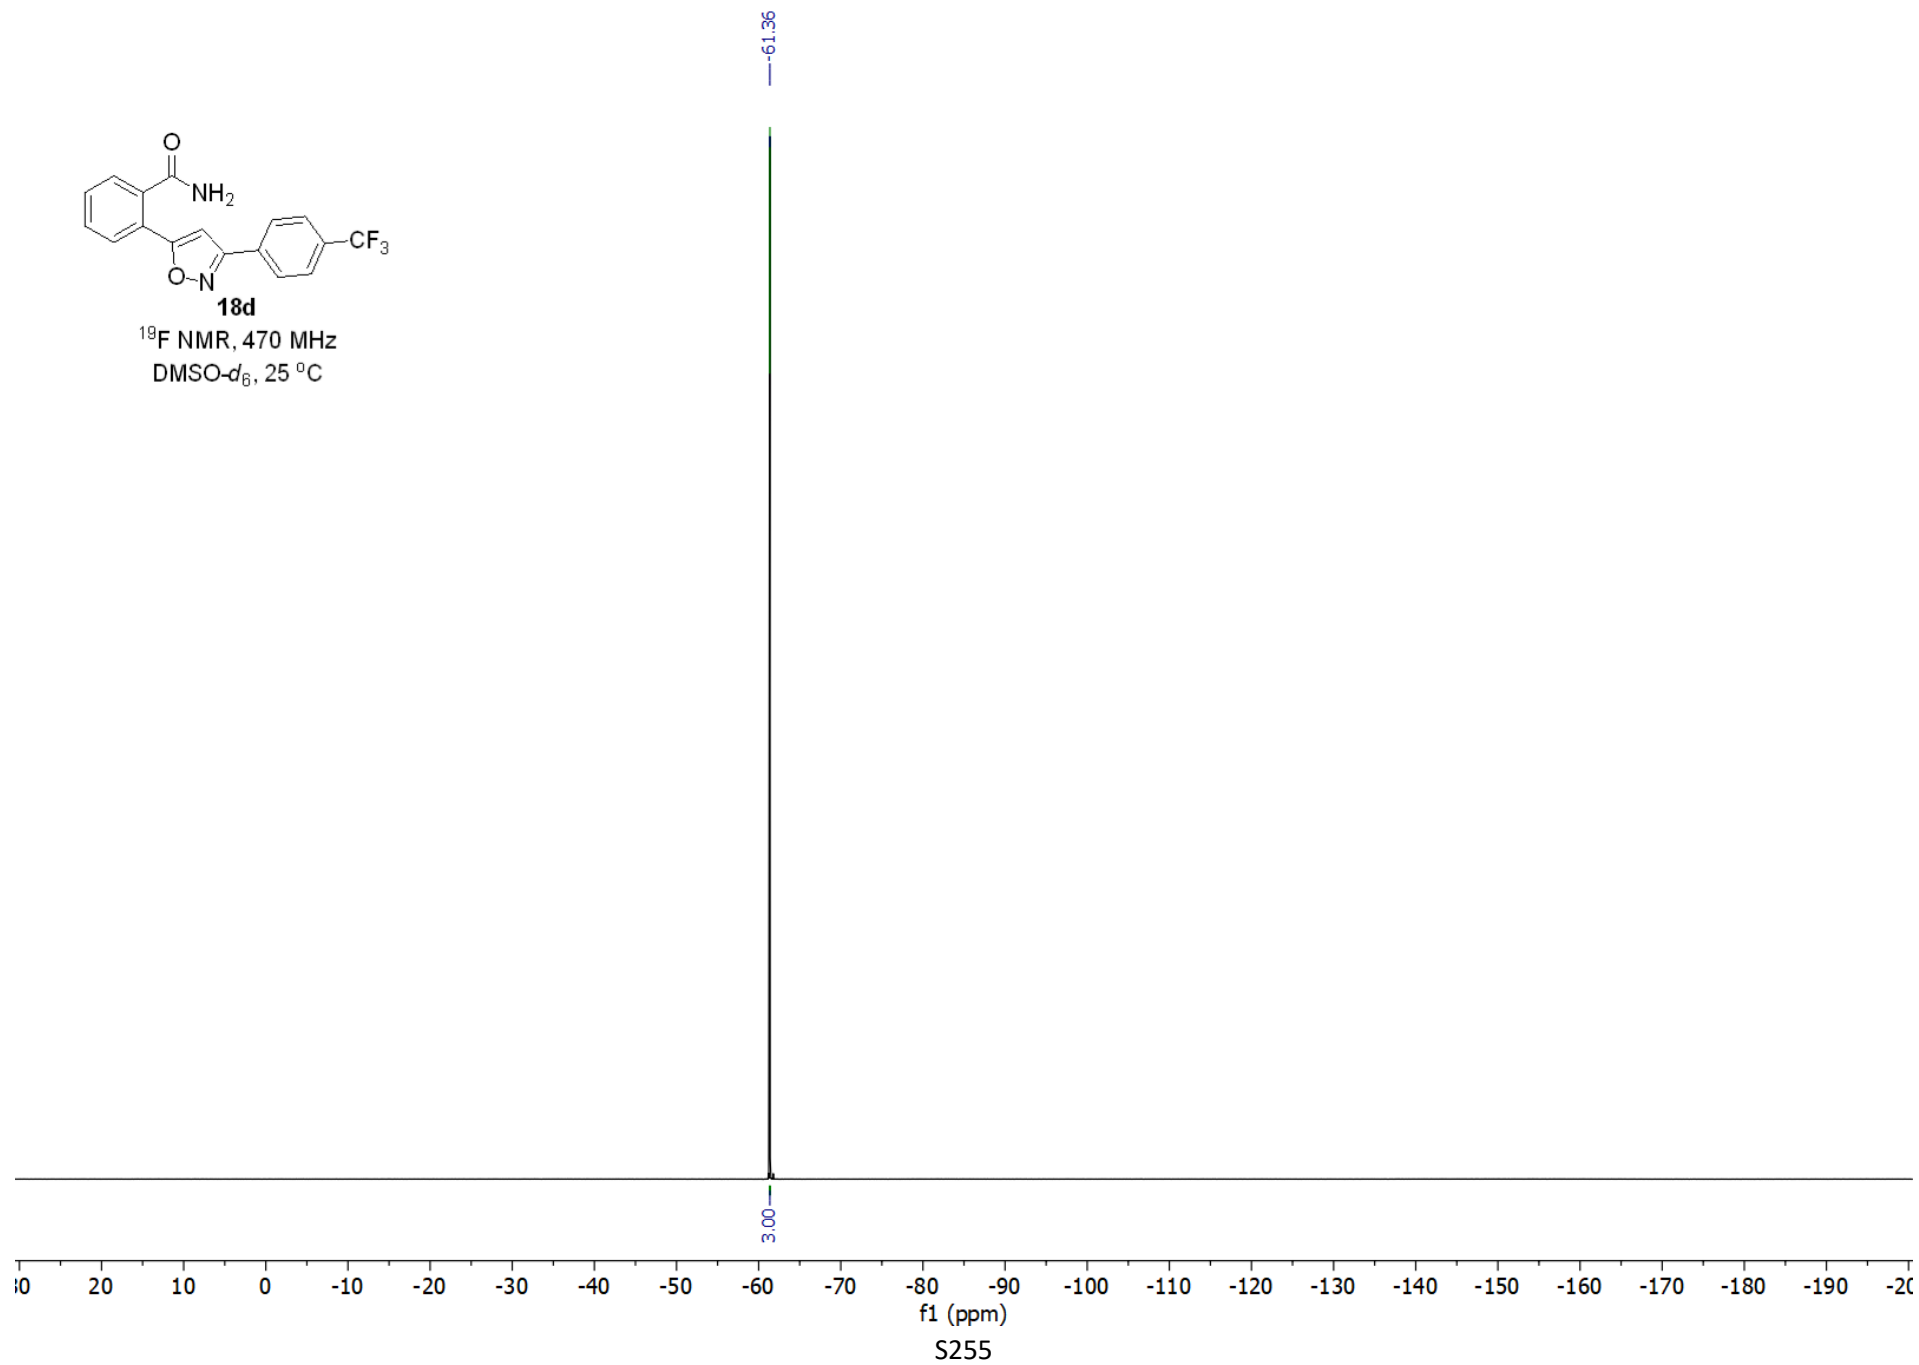

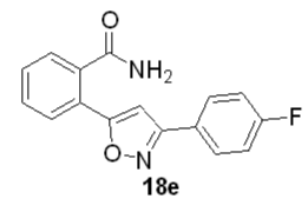

<sup>1</sup>H NMR, 500 MHz  
DMSO-*d*<sub>6</sub>, 25 °C

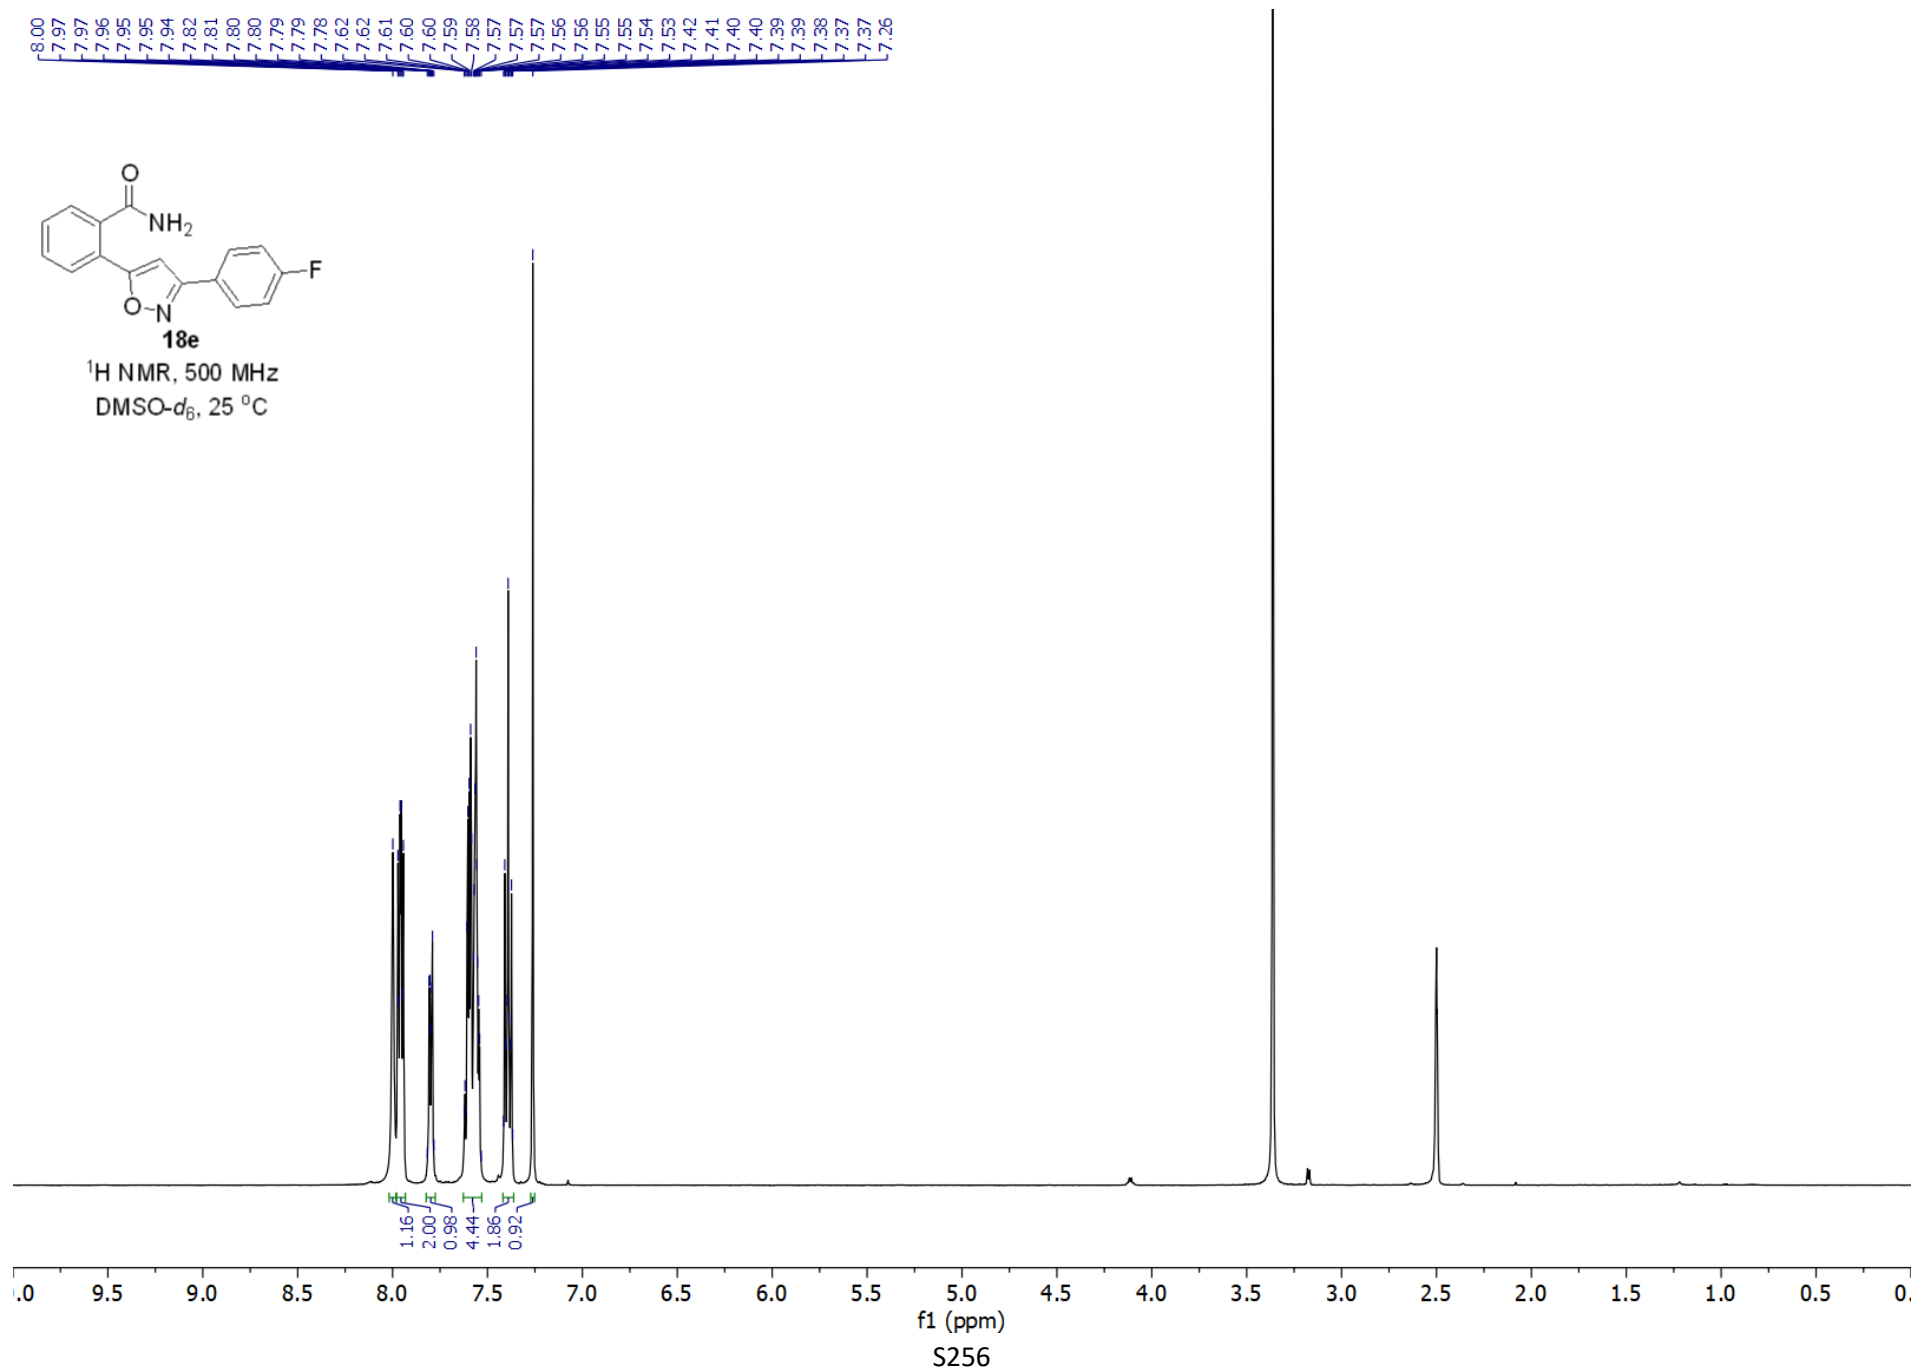

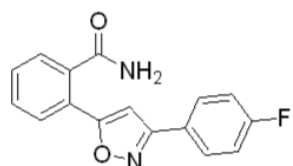

**18e**

$^{13}\text{C}$  NMR, 125 MHz  
DMSO- $d_6$ , 25 °C

170.62  
169.97  
164.69  
162.72  
161.75

137.47  
130.79  
130.08  
129.42  
129.35  
128.95  
128.36  
125.63  
125.60  
124.68  
116.84  
116.66

101.15

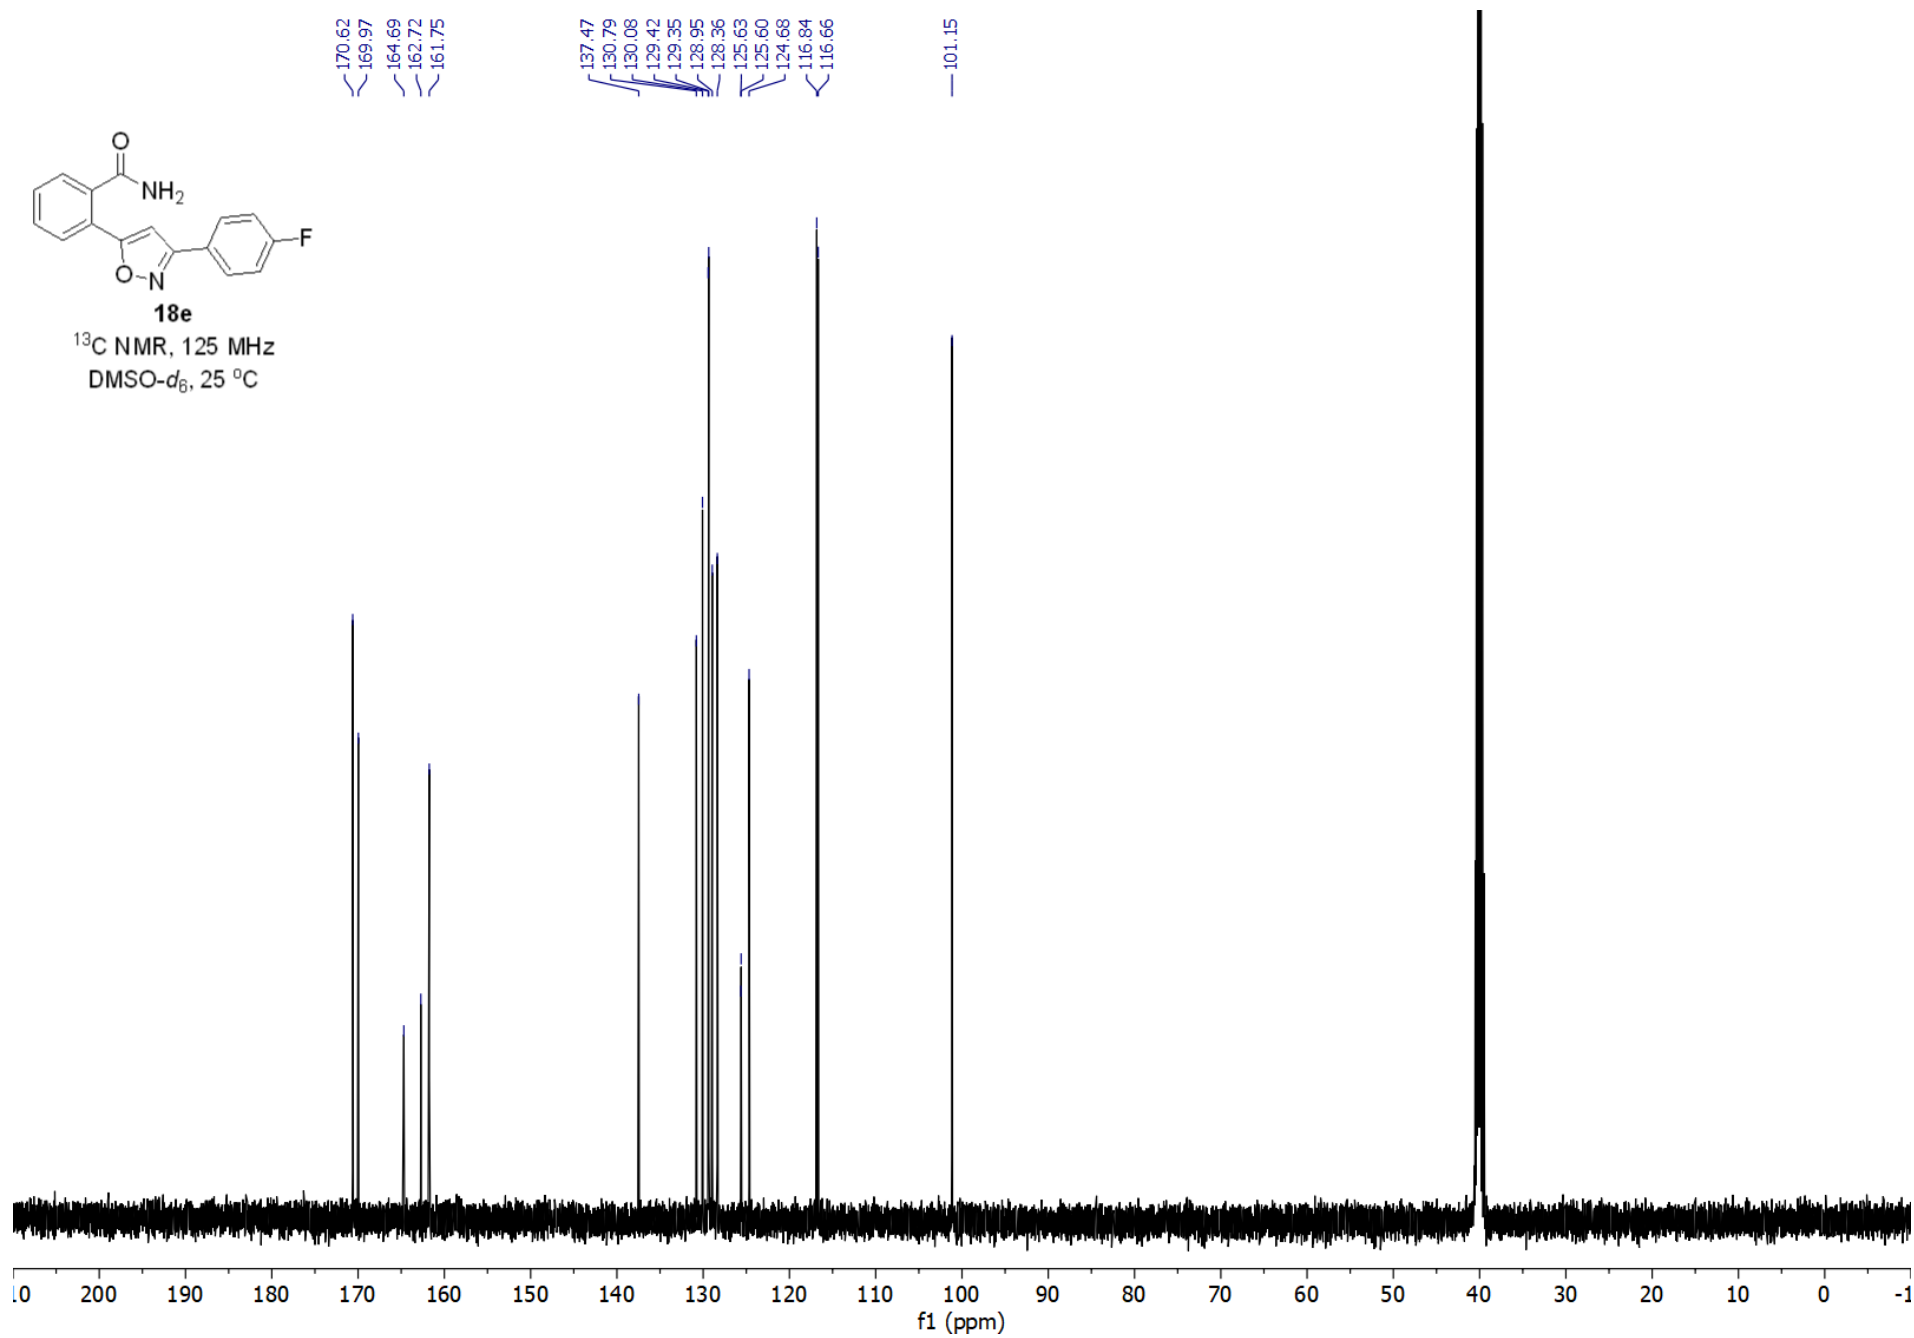

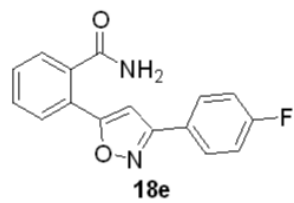

$^{19}\text{F}$  NMR, 470 MHz  
DMSO- $d_6$ , 25 °C

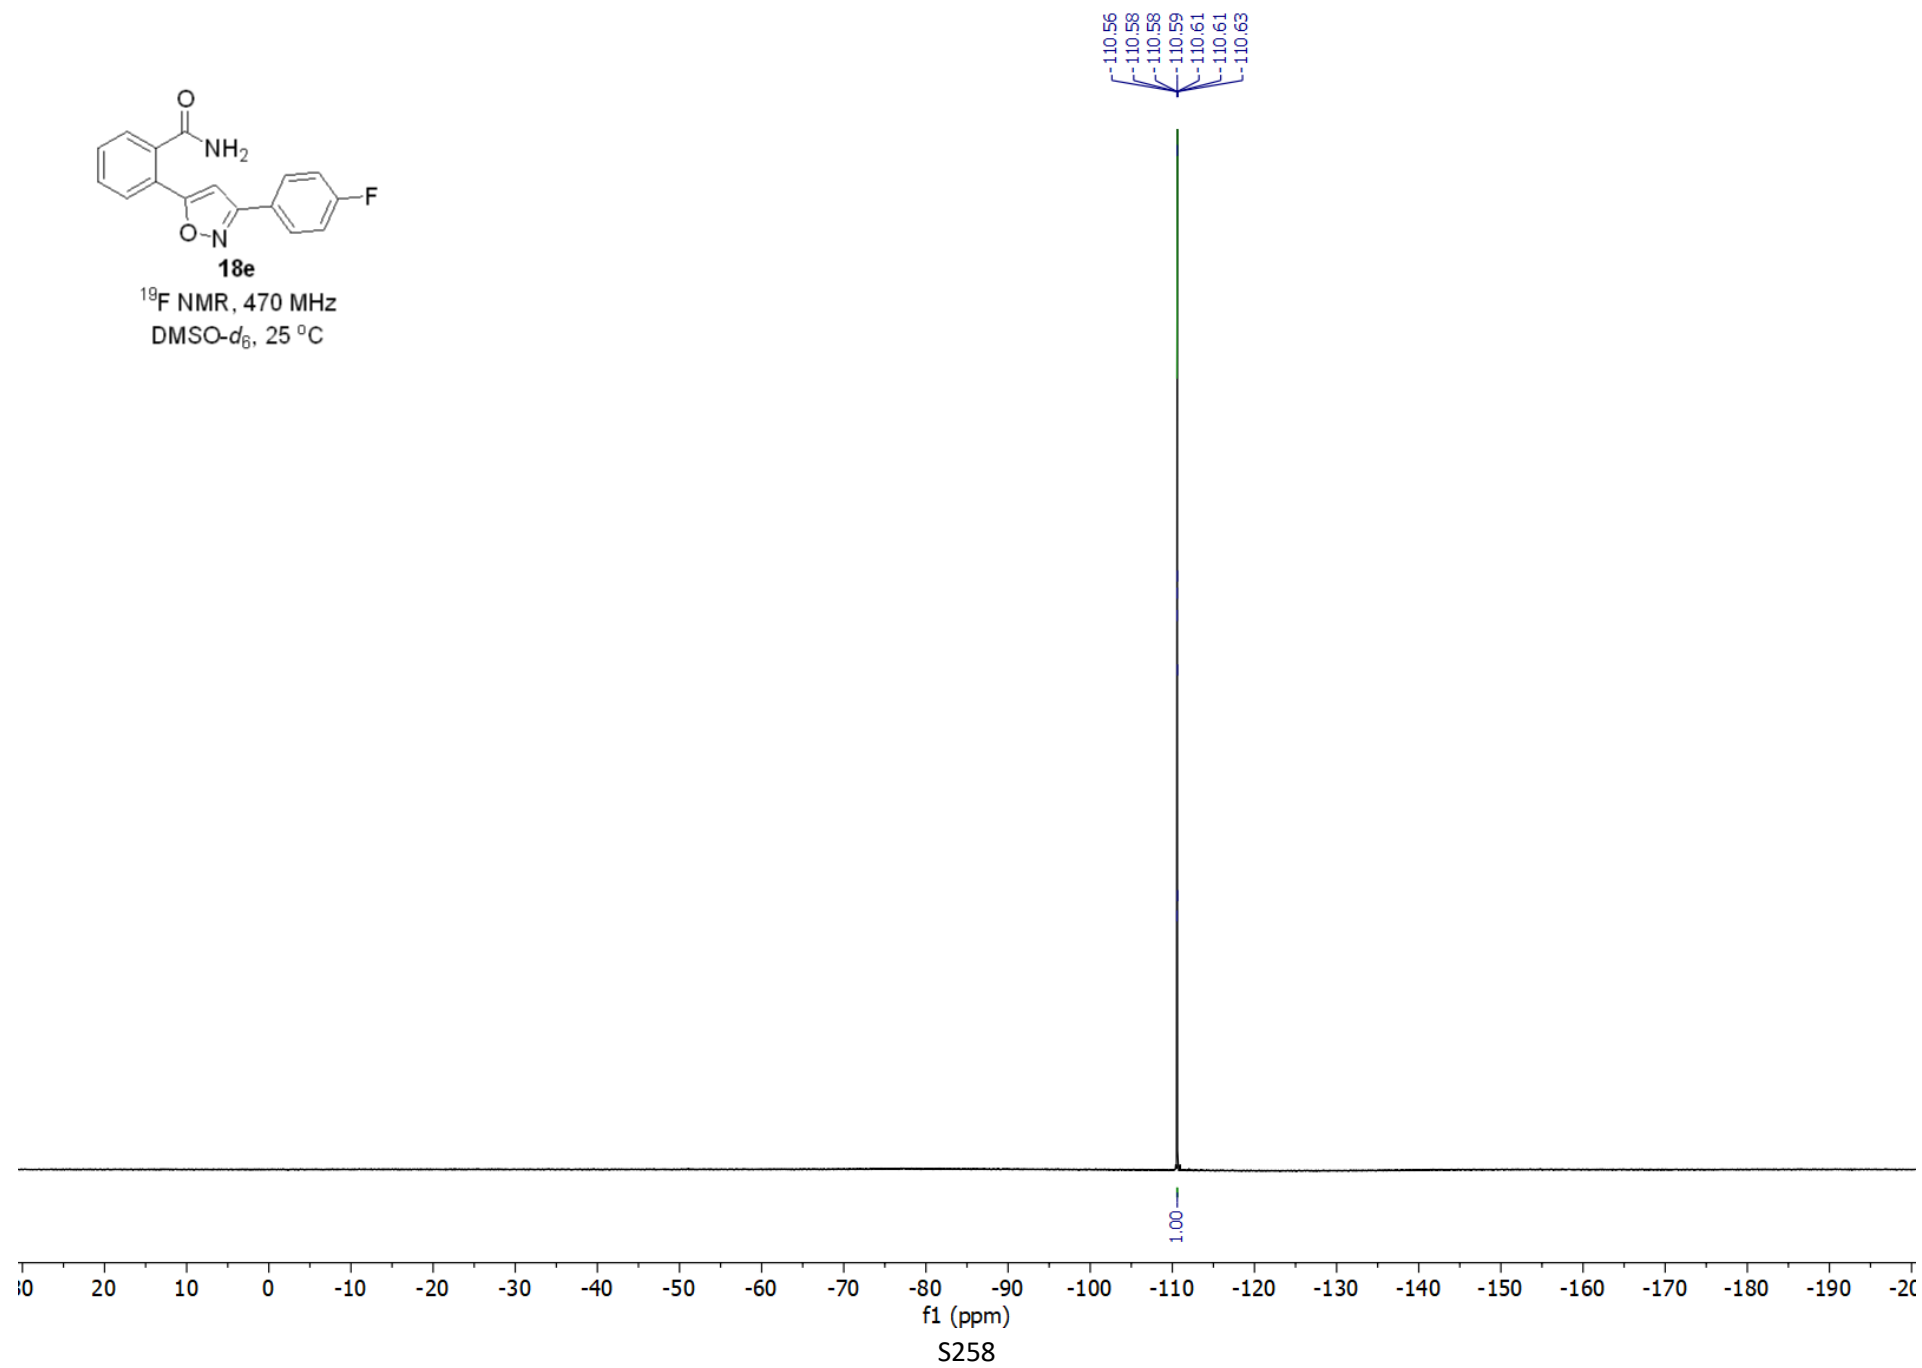

8.00  
7.83  
7.82  
7.82  
7.81  
7.81  
7.81  
7.60  
7.60  
7.59  
7.59  
7.58  
7.58  
7.57  
7.57  
7.57  
7.56  
7.56  
7.55  
7.55

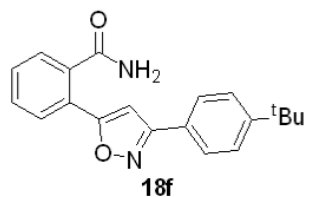

<sup>1</sup>H NMR, 500 MHz  
DMSO-*d*<sub>6</sub>, 25 °C

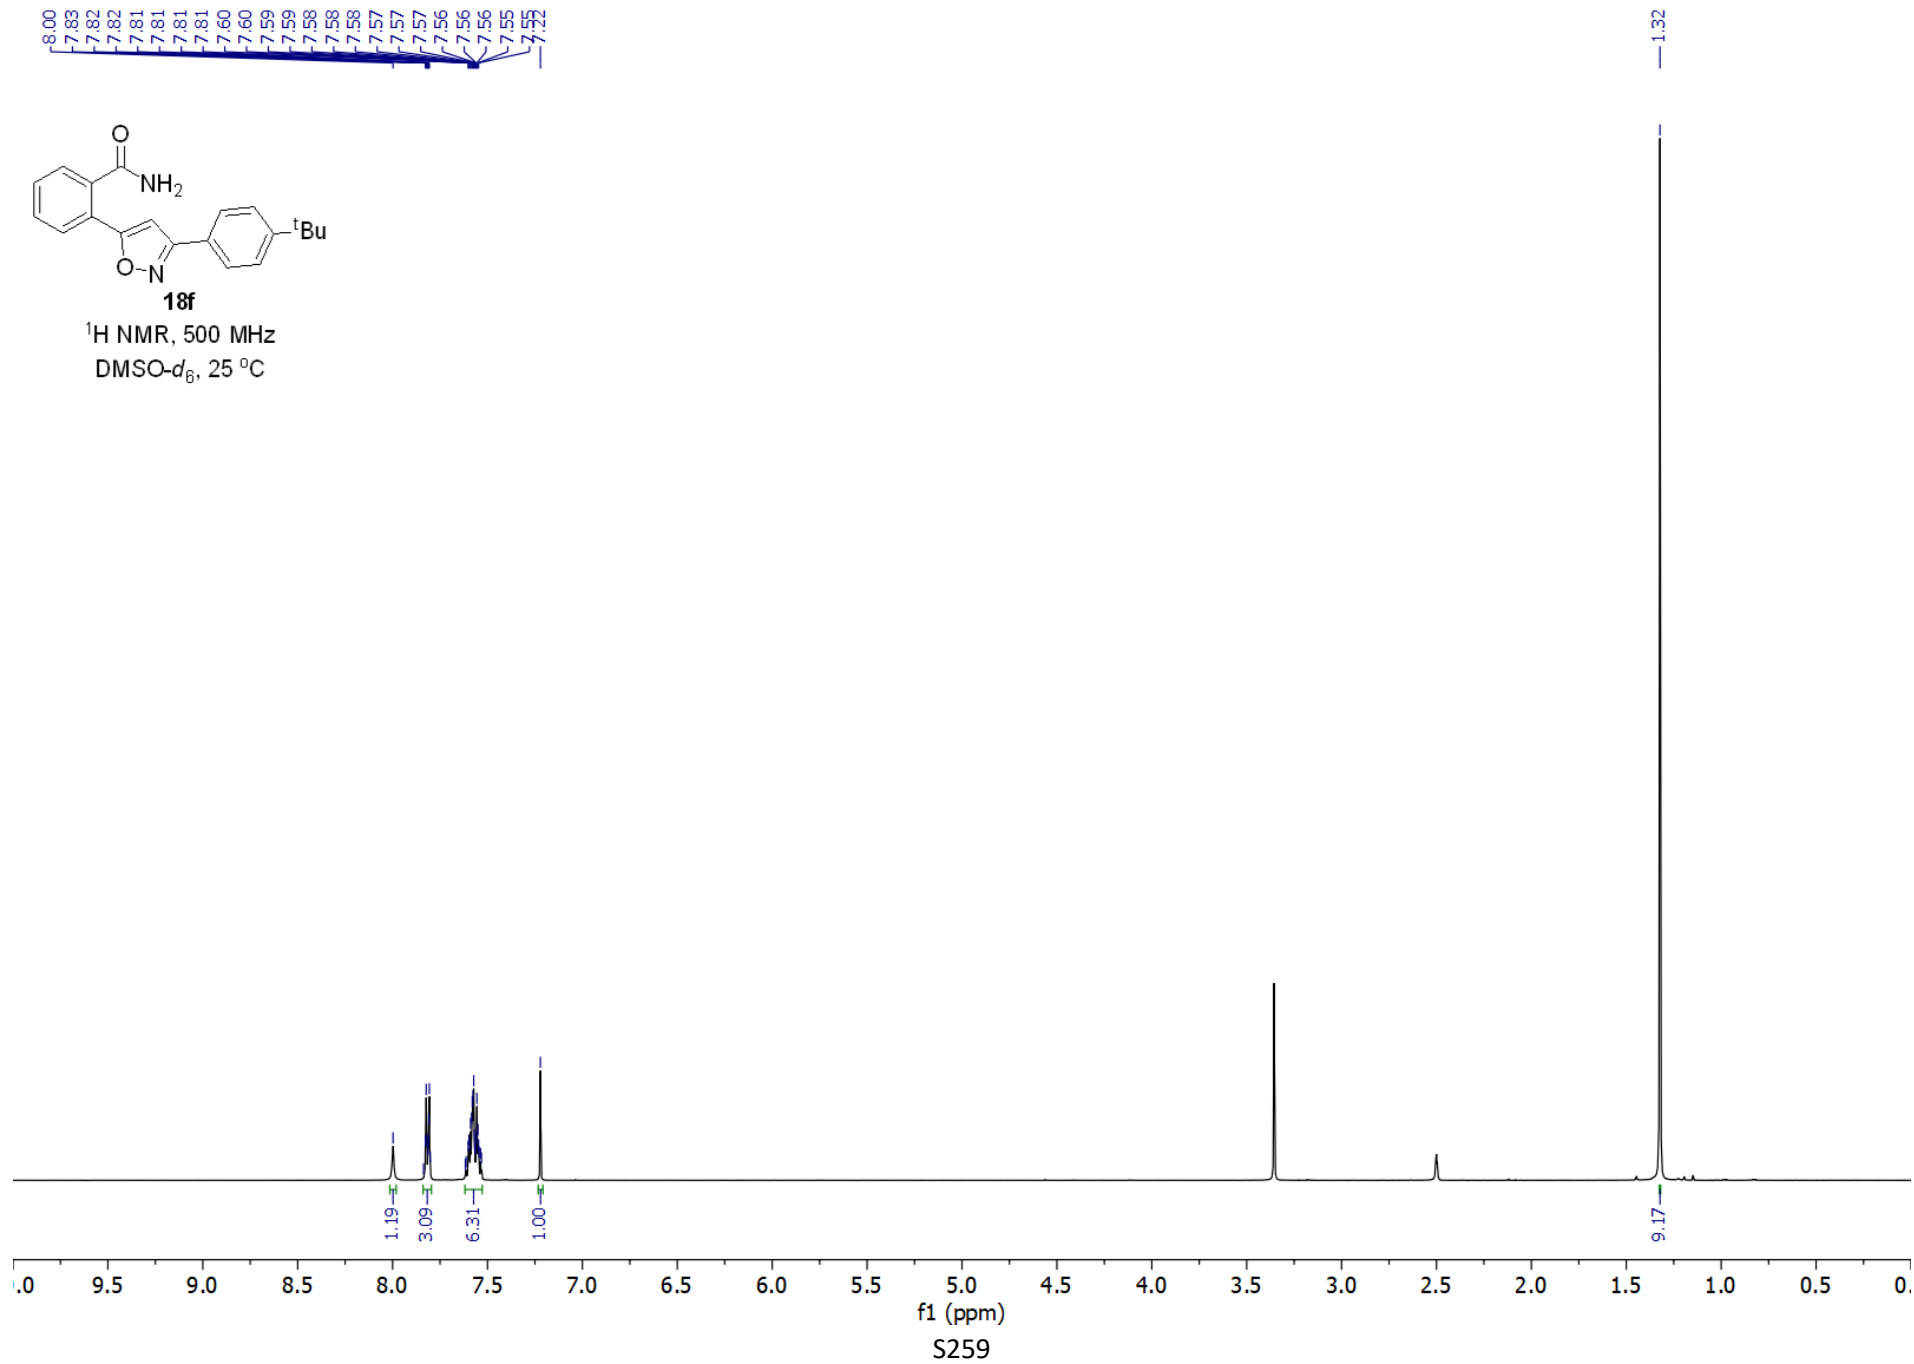

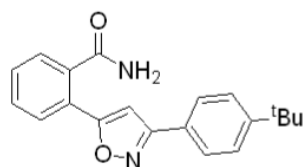

**18f**

$^{13}\text{C}$  NMR, 125 MHz  
DMSO- $d_6$ , 25 °C

170.70  
169.57

162.47

153.44

137.44

130.68

130.01

128.83

128.31

126.82

126.45

126.28

124.68

101.06

35.07

31.44

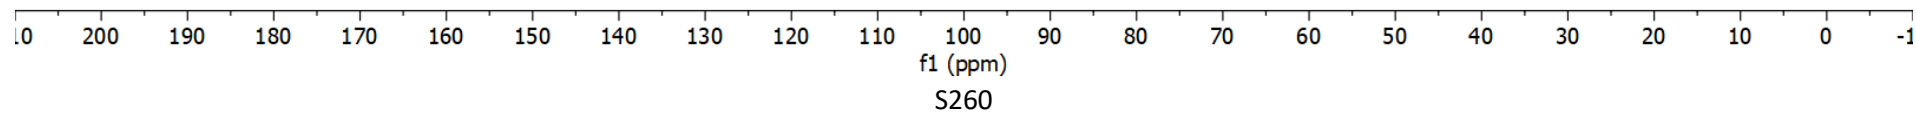

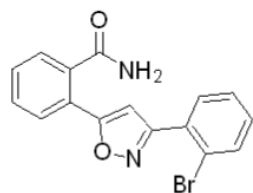

**18g**

$^1\text{H}$  NMR, 500 MHz

$\text{DMSO}-d_6$ , 25  $^\circ\text{C}$

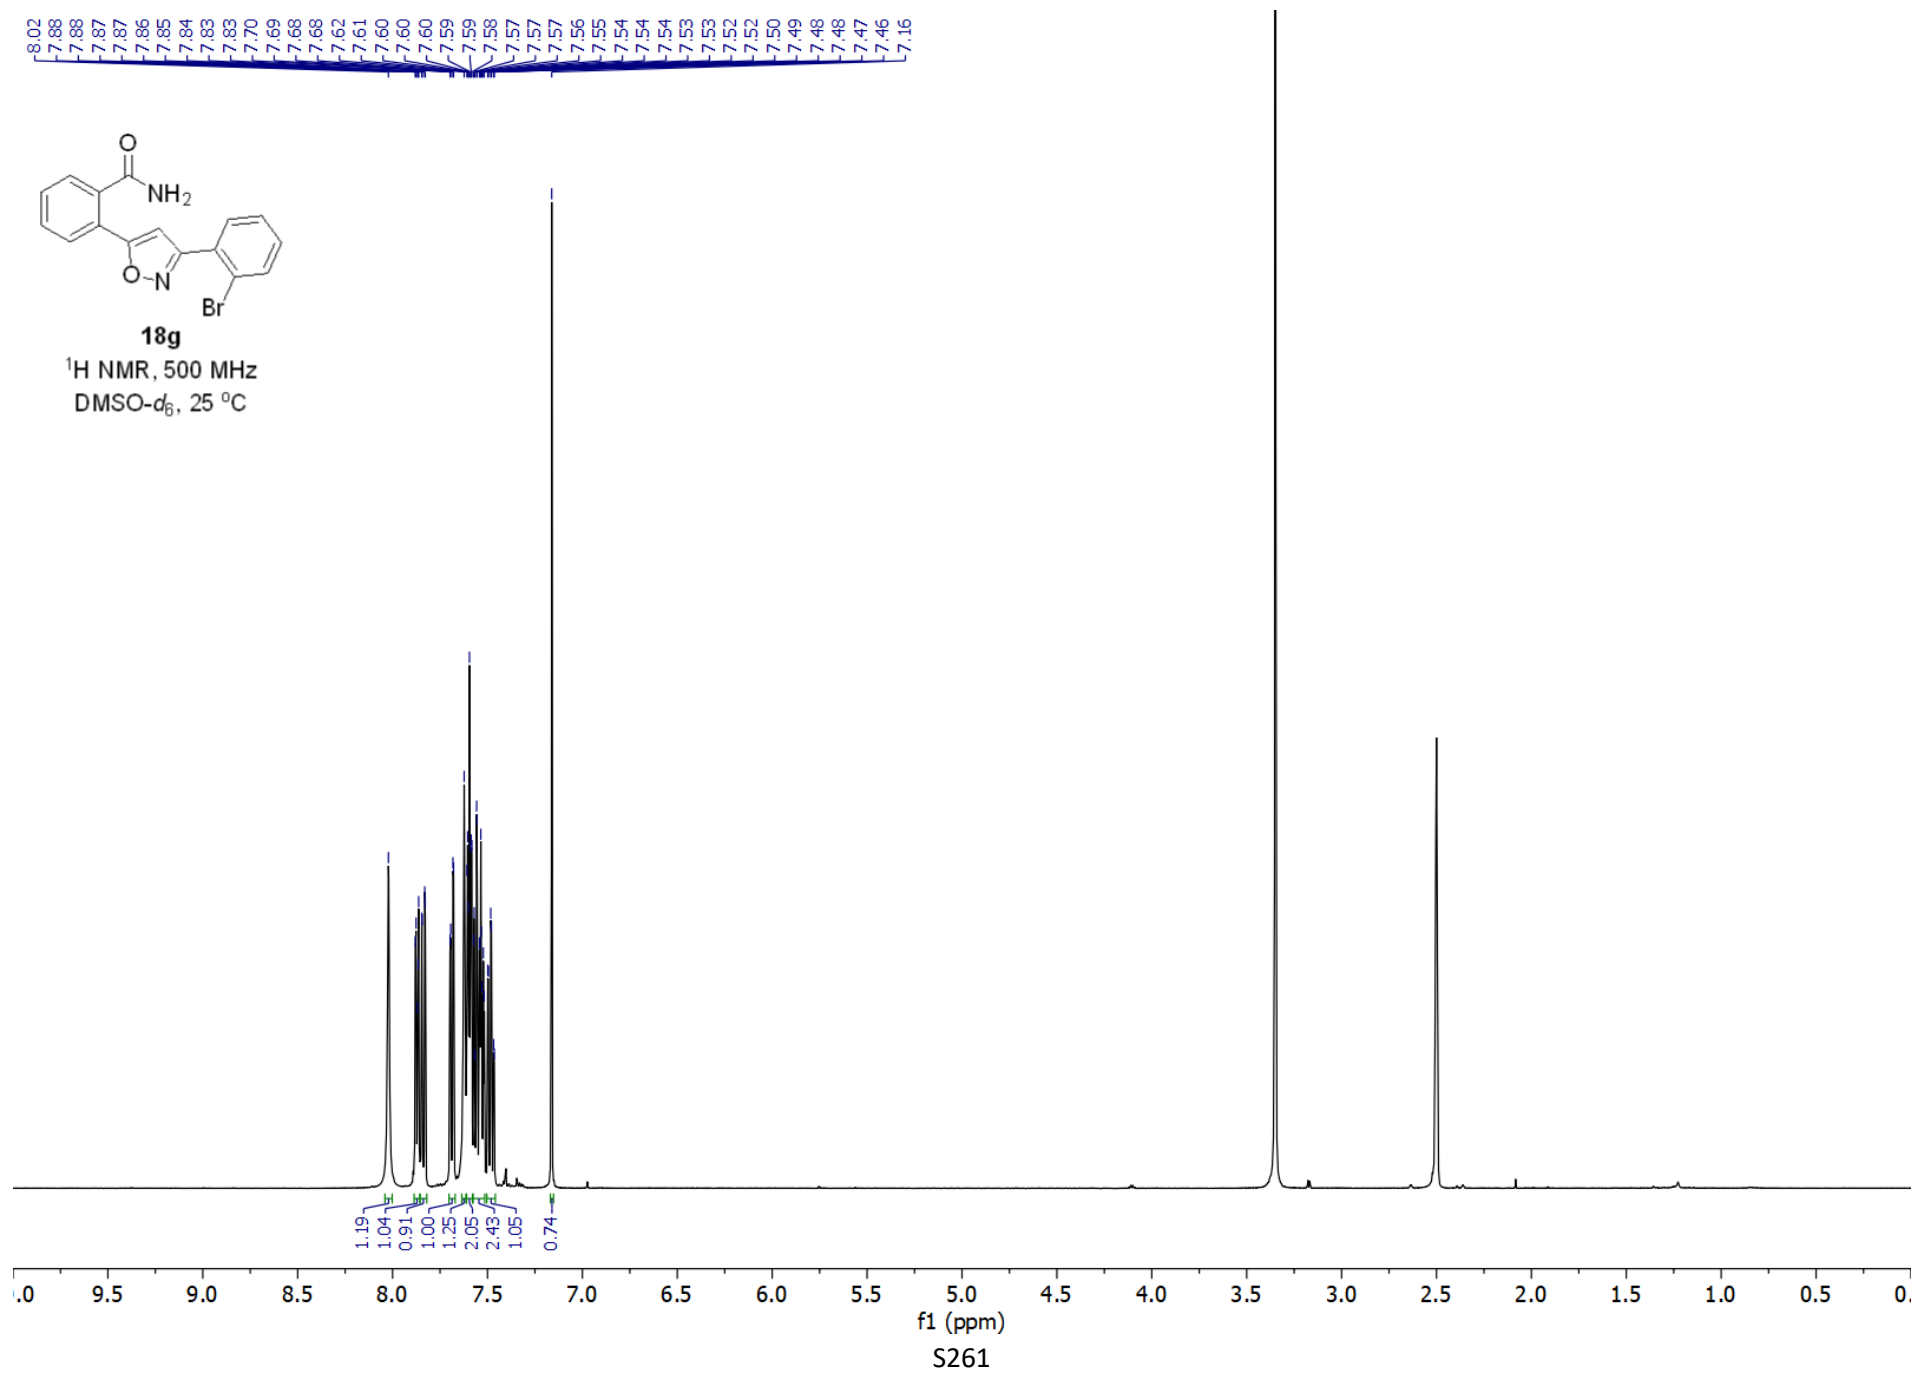

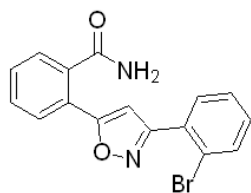

**18g**

$^{13}\text{C}$  NMR, 125 MHz  
DMSO- $d_6$ , 25 °C

— 170.78  
— 168.54  
— 162.73

137.52  
134.15  
132.29  
131.81  
130.82  
130.29  
129.99  
128.71  
128.52  
128.25  
124.08  
121.97

— 104.19

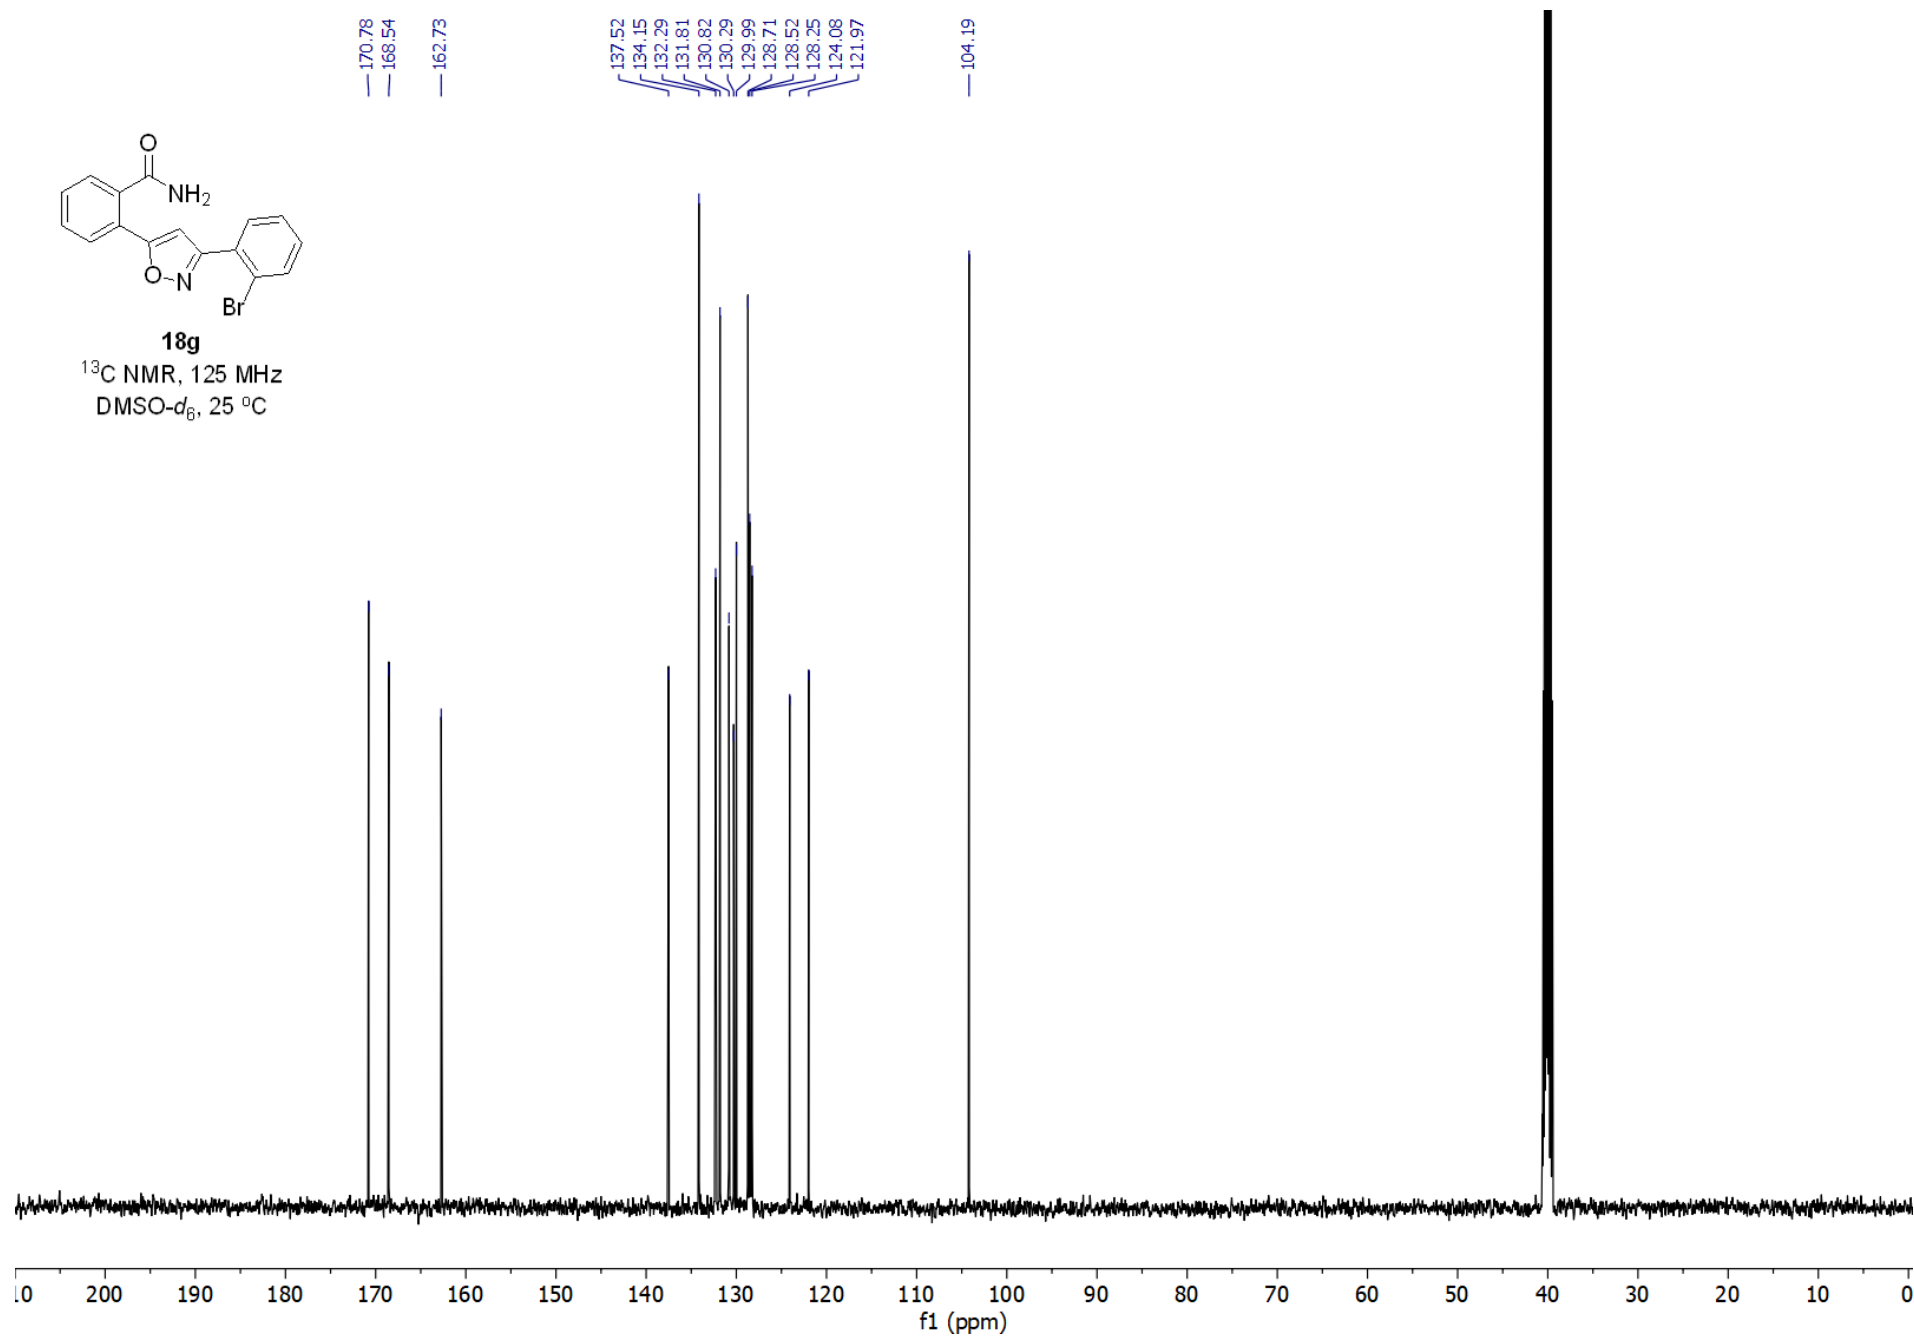

S262

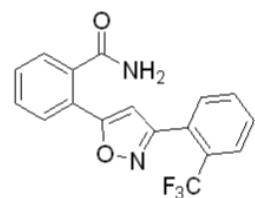

**18h**

$^1\text{H}$  NMR, 500 MHz  
DMSO- $d_6$ , 25  $^\circ\text{C}$

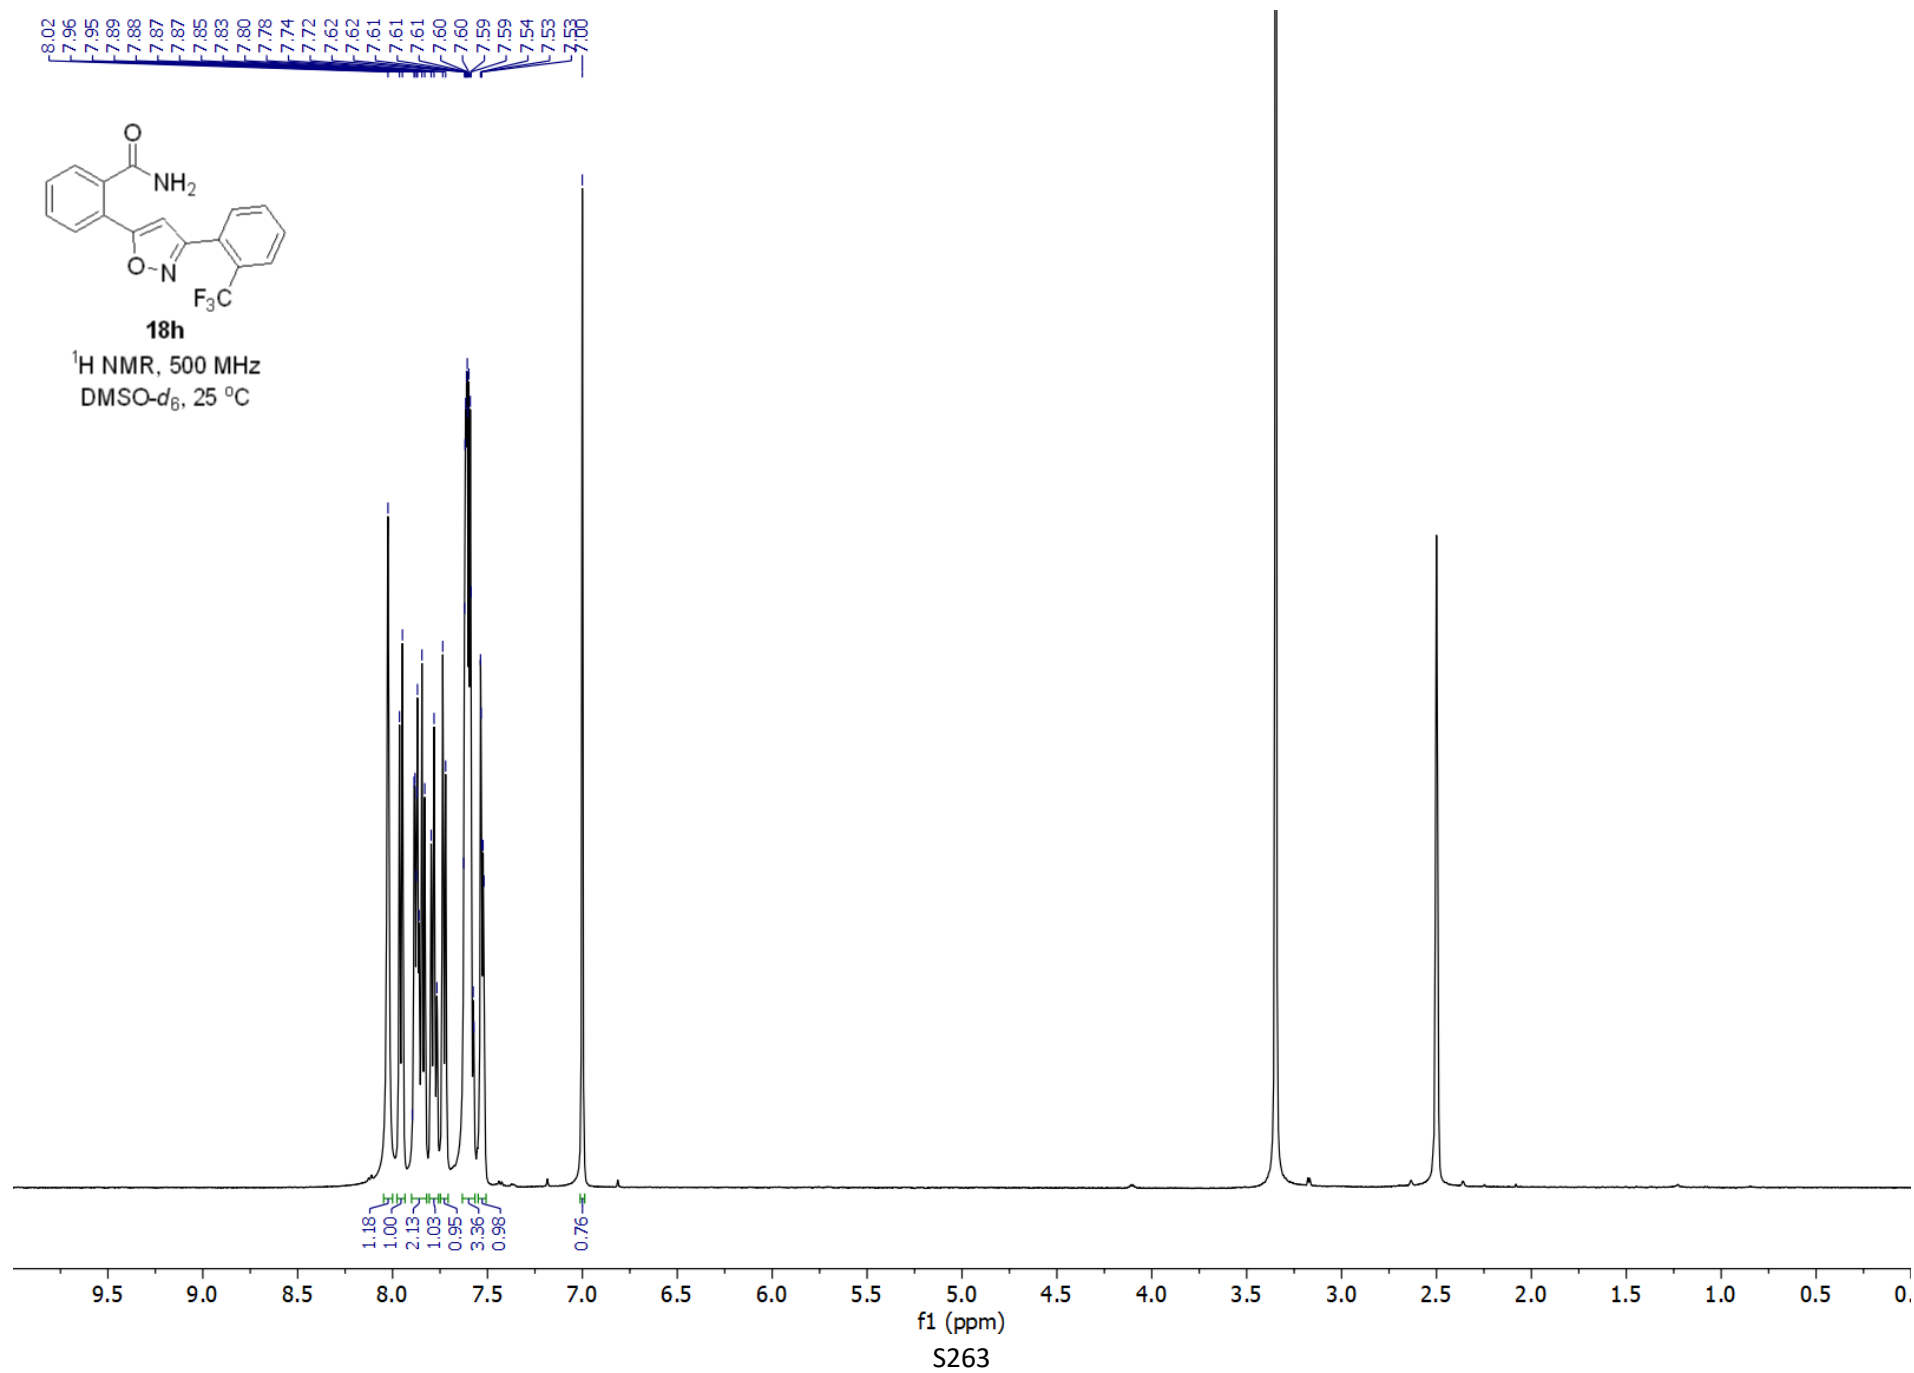

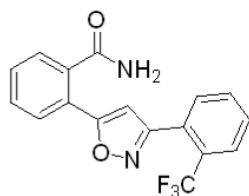

**18h**

$^{13}\text{C}$  NMR, 125 MHz

DMSO- $d_6$ , 25 °C

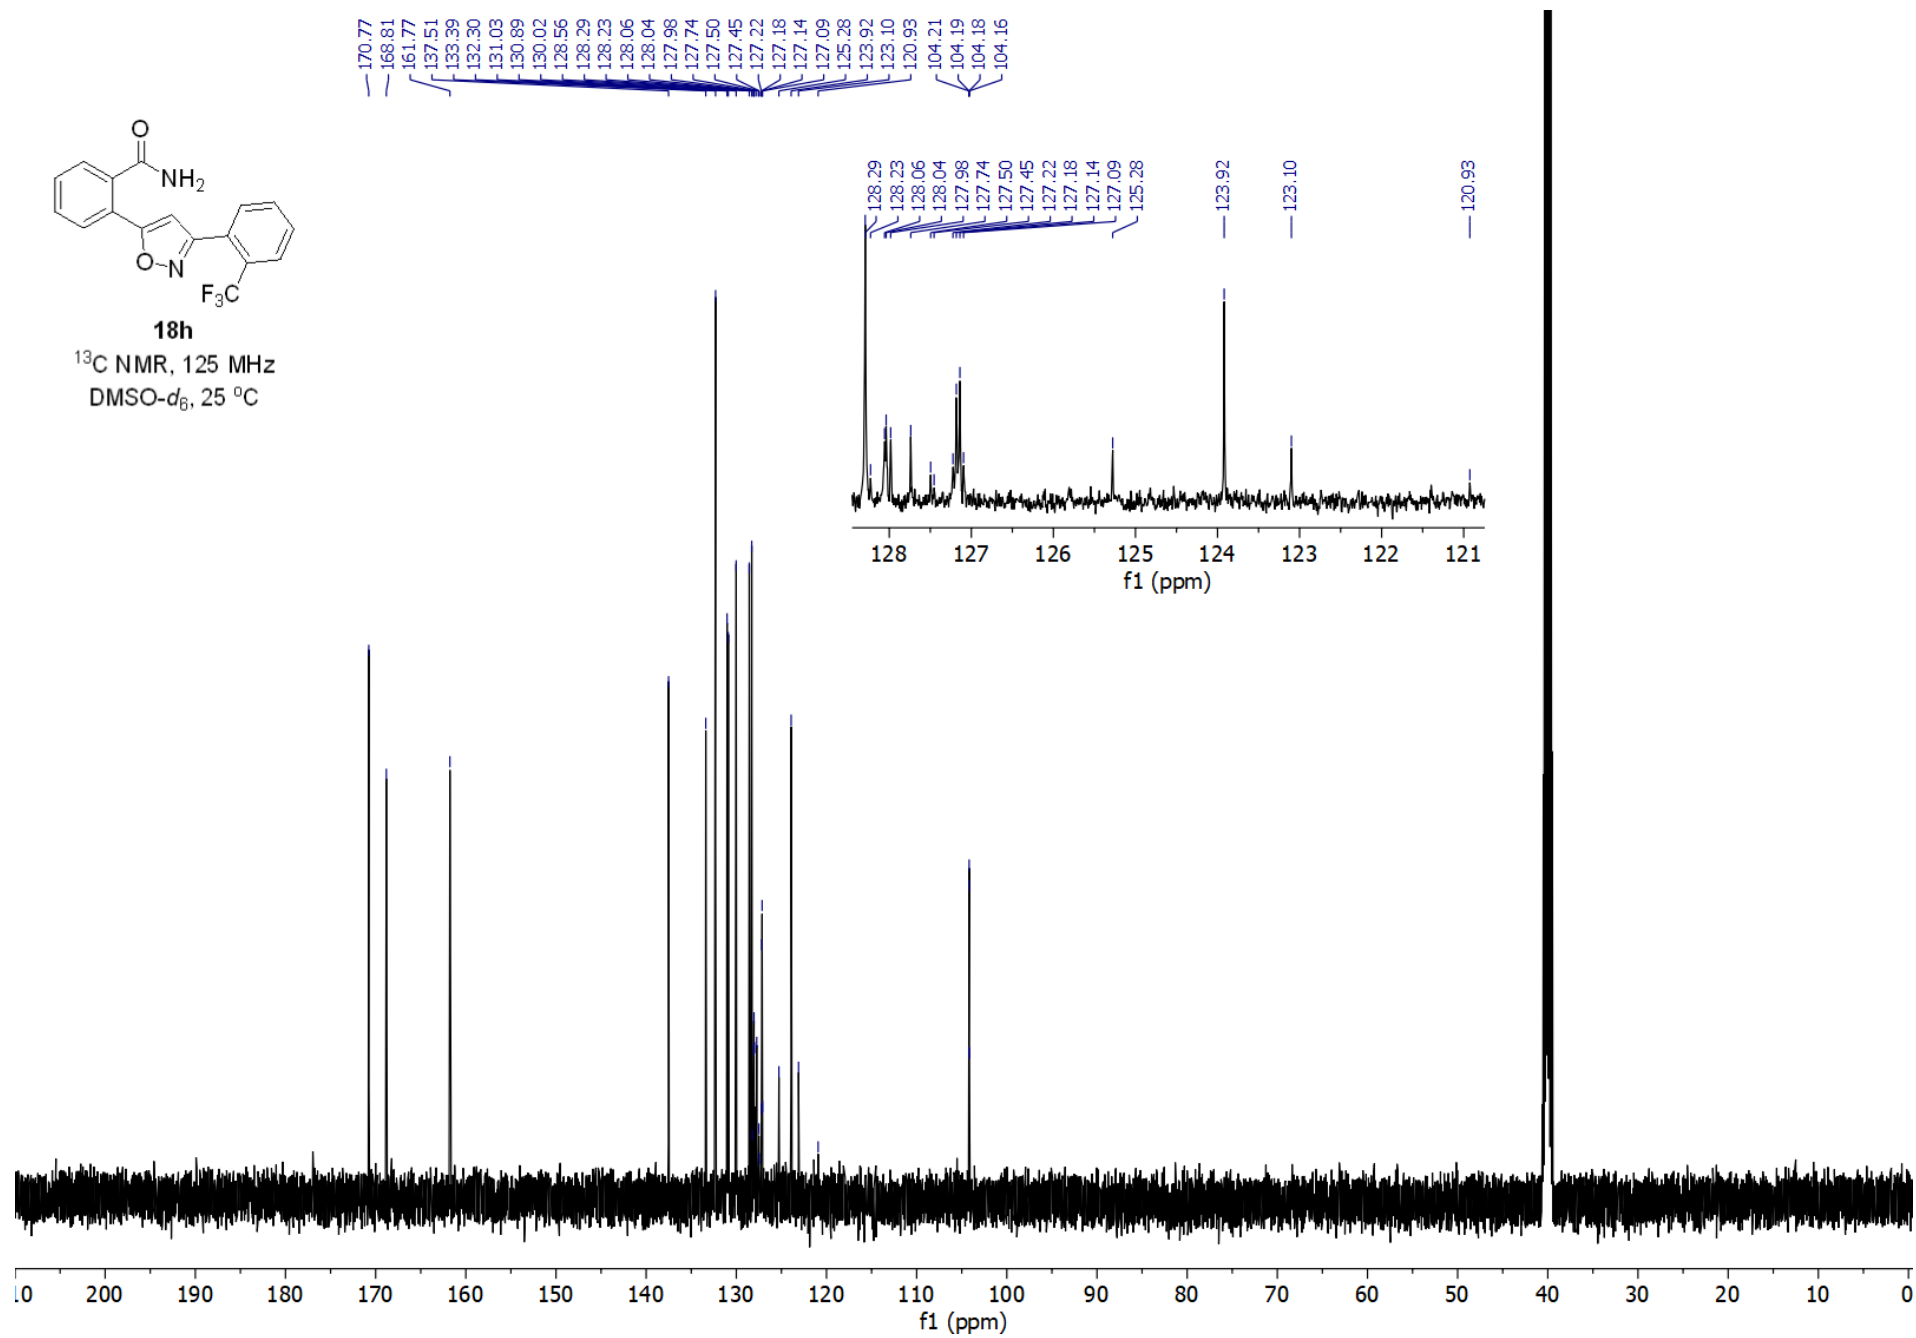

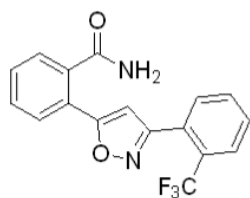

**18h**

$^{19}\text{F}$  NMR, 470 MHz  
DMSO- $d_6$ , 25 °C

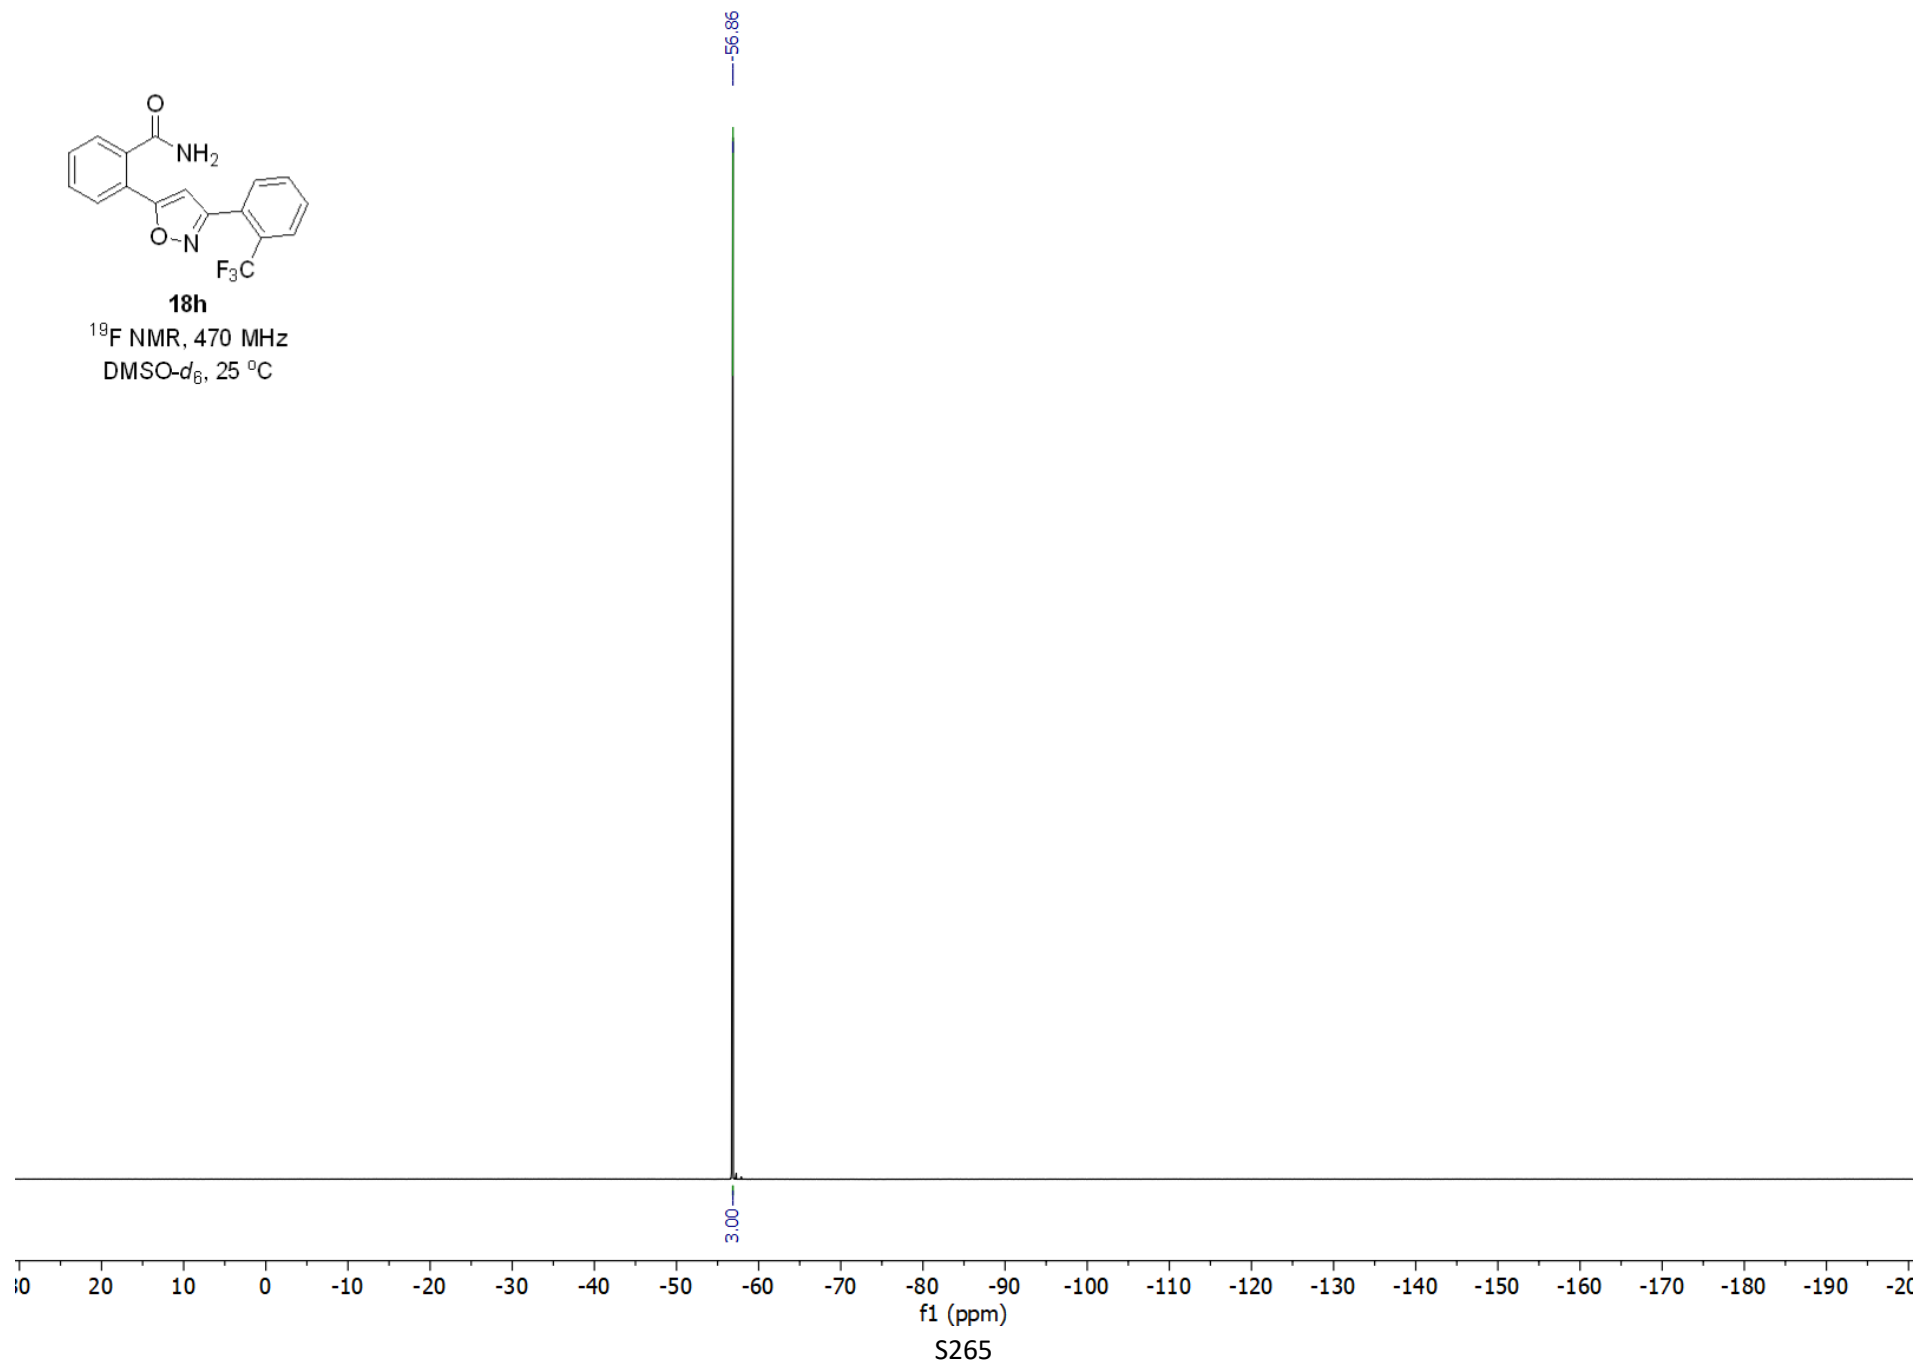

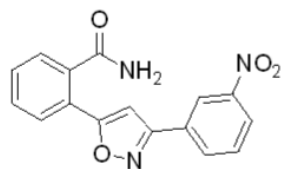

**18i**

$^1\text{H}$  NMR, 500 MHz

$\text{DMSO-}d_6$ , 25  $^\circ\text{C}$

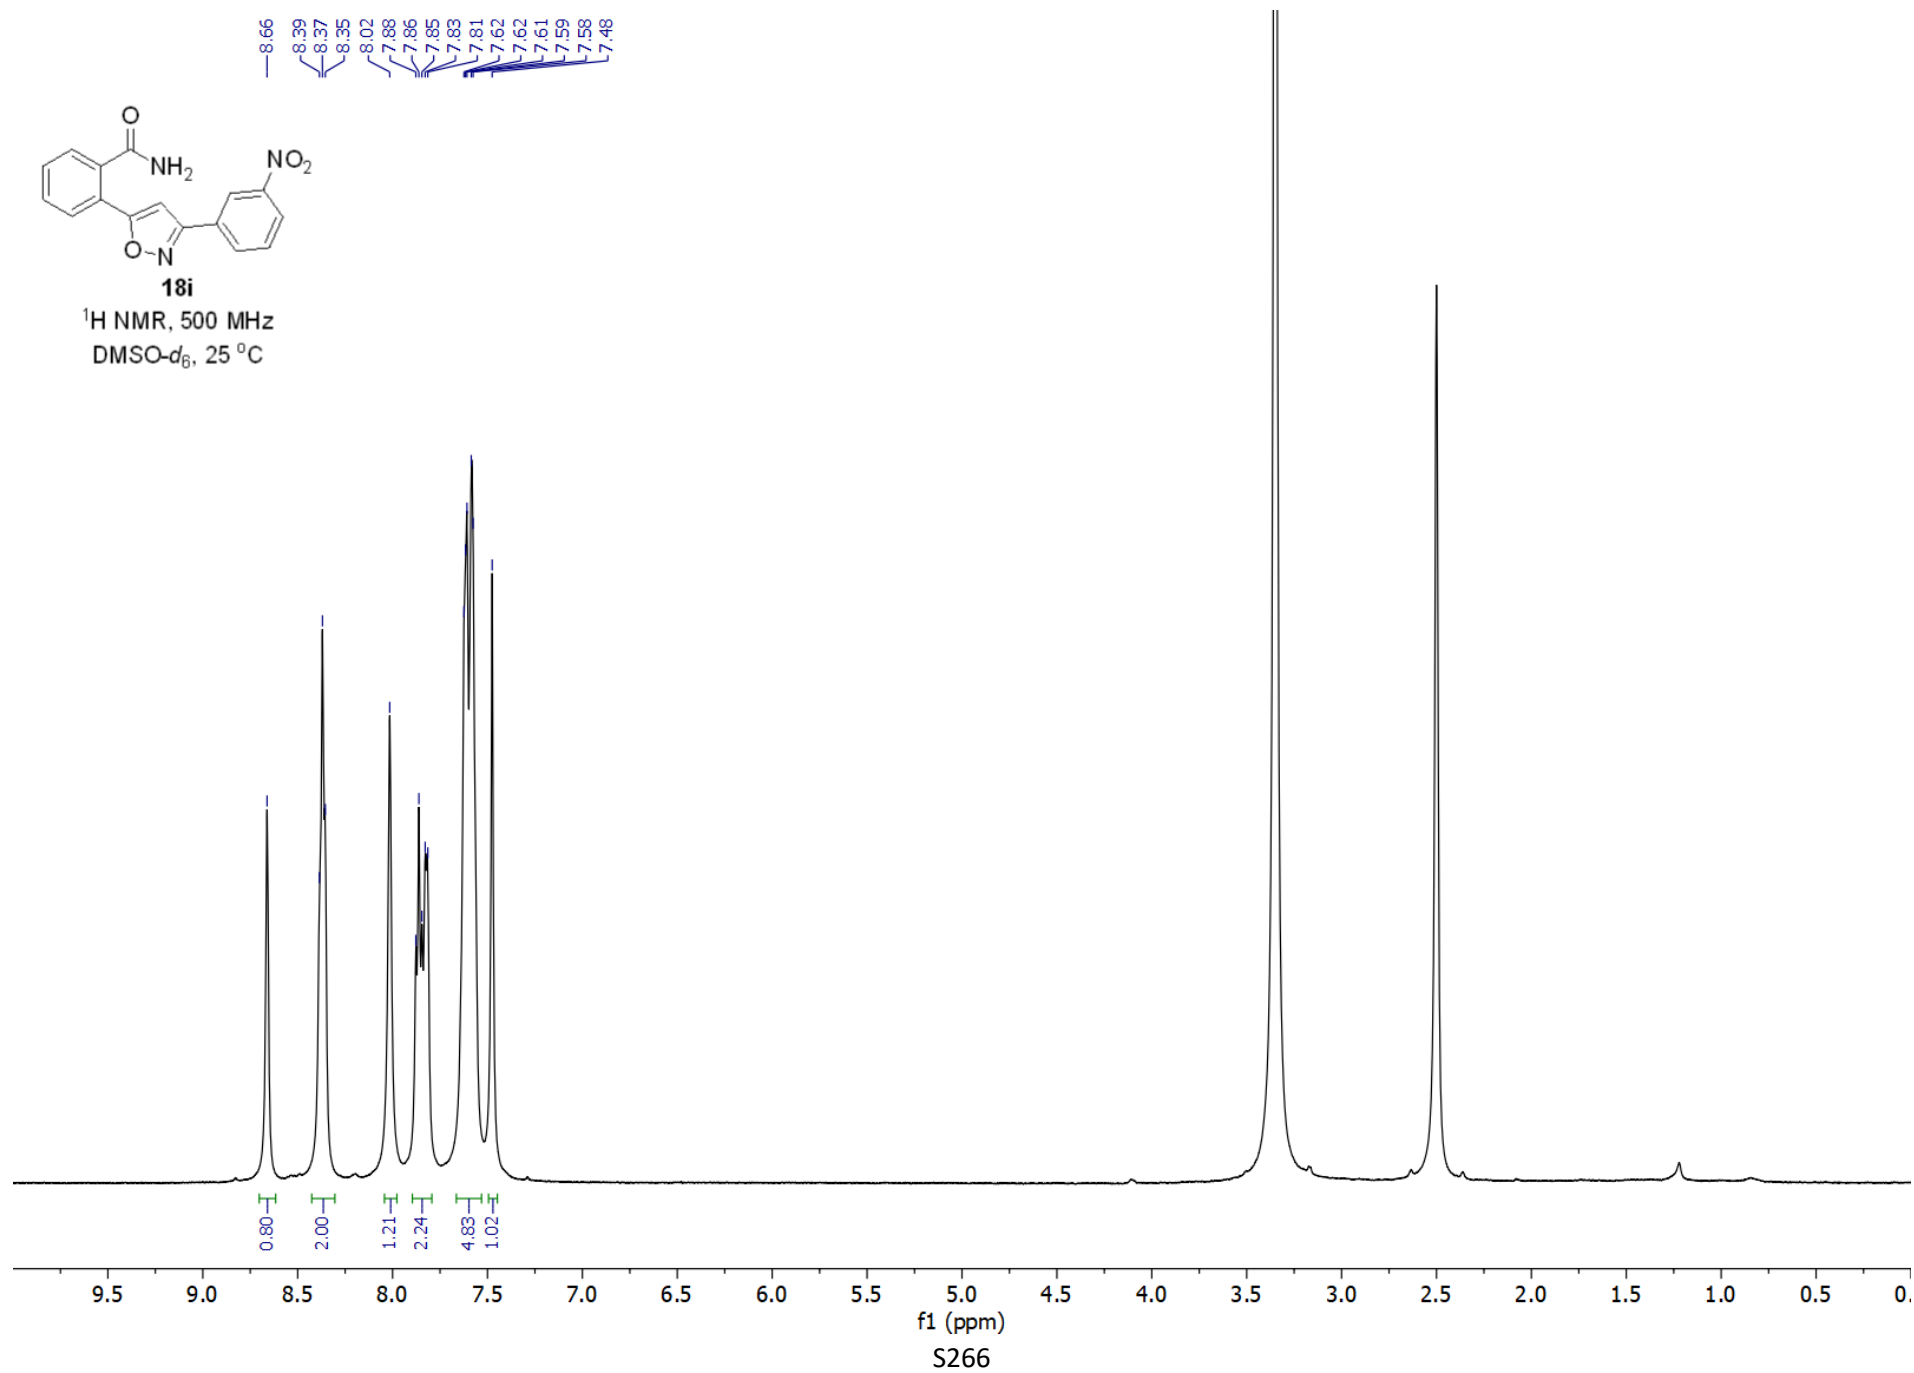

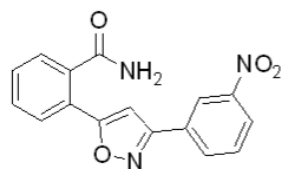

**18i**

$^{13}\text{C}$  NMR, 125 MHz  
DMSO- $d_6$ , 25 °C

170.68  
170.52  
161.13  
148.87  
137.47  
133.32  
131.49  
130.98  
130.58  
130.17  
129.09  
128.44  
125.40  
124.51  
121.52  
101.44

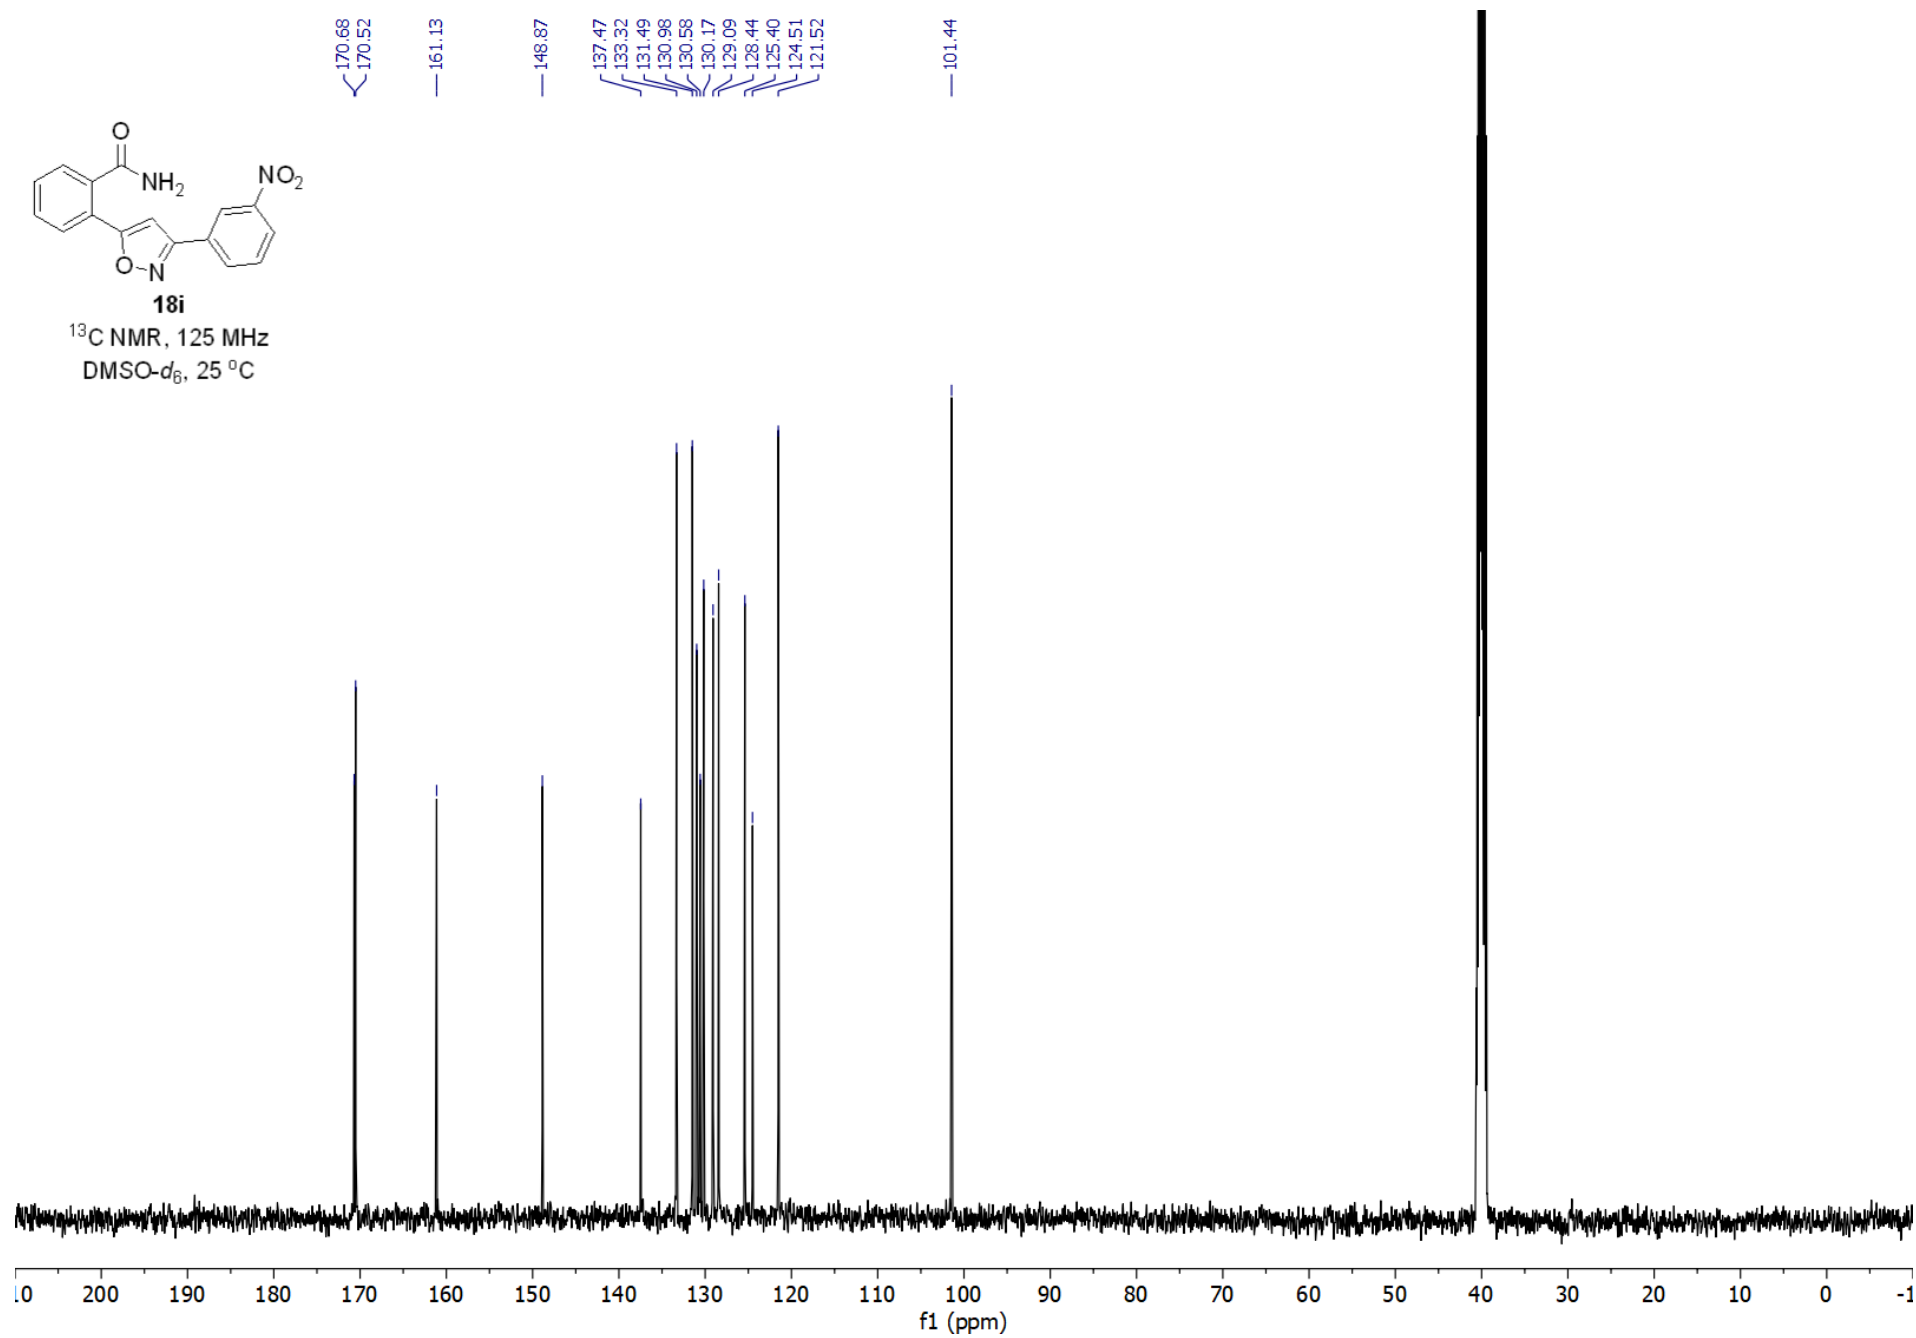

f1 (ppm)

S267

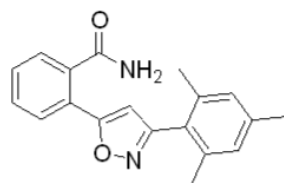

**18j**

<sup>1</sup>H NMR, 500 MHz  
CDCl<sub>3</sub>, 25 °C

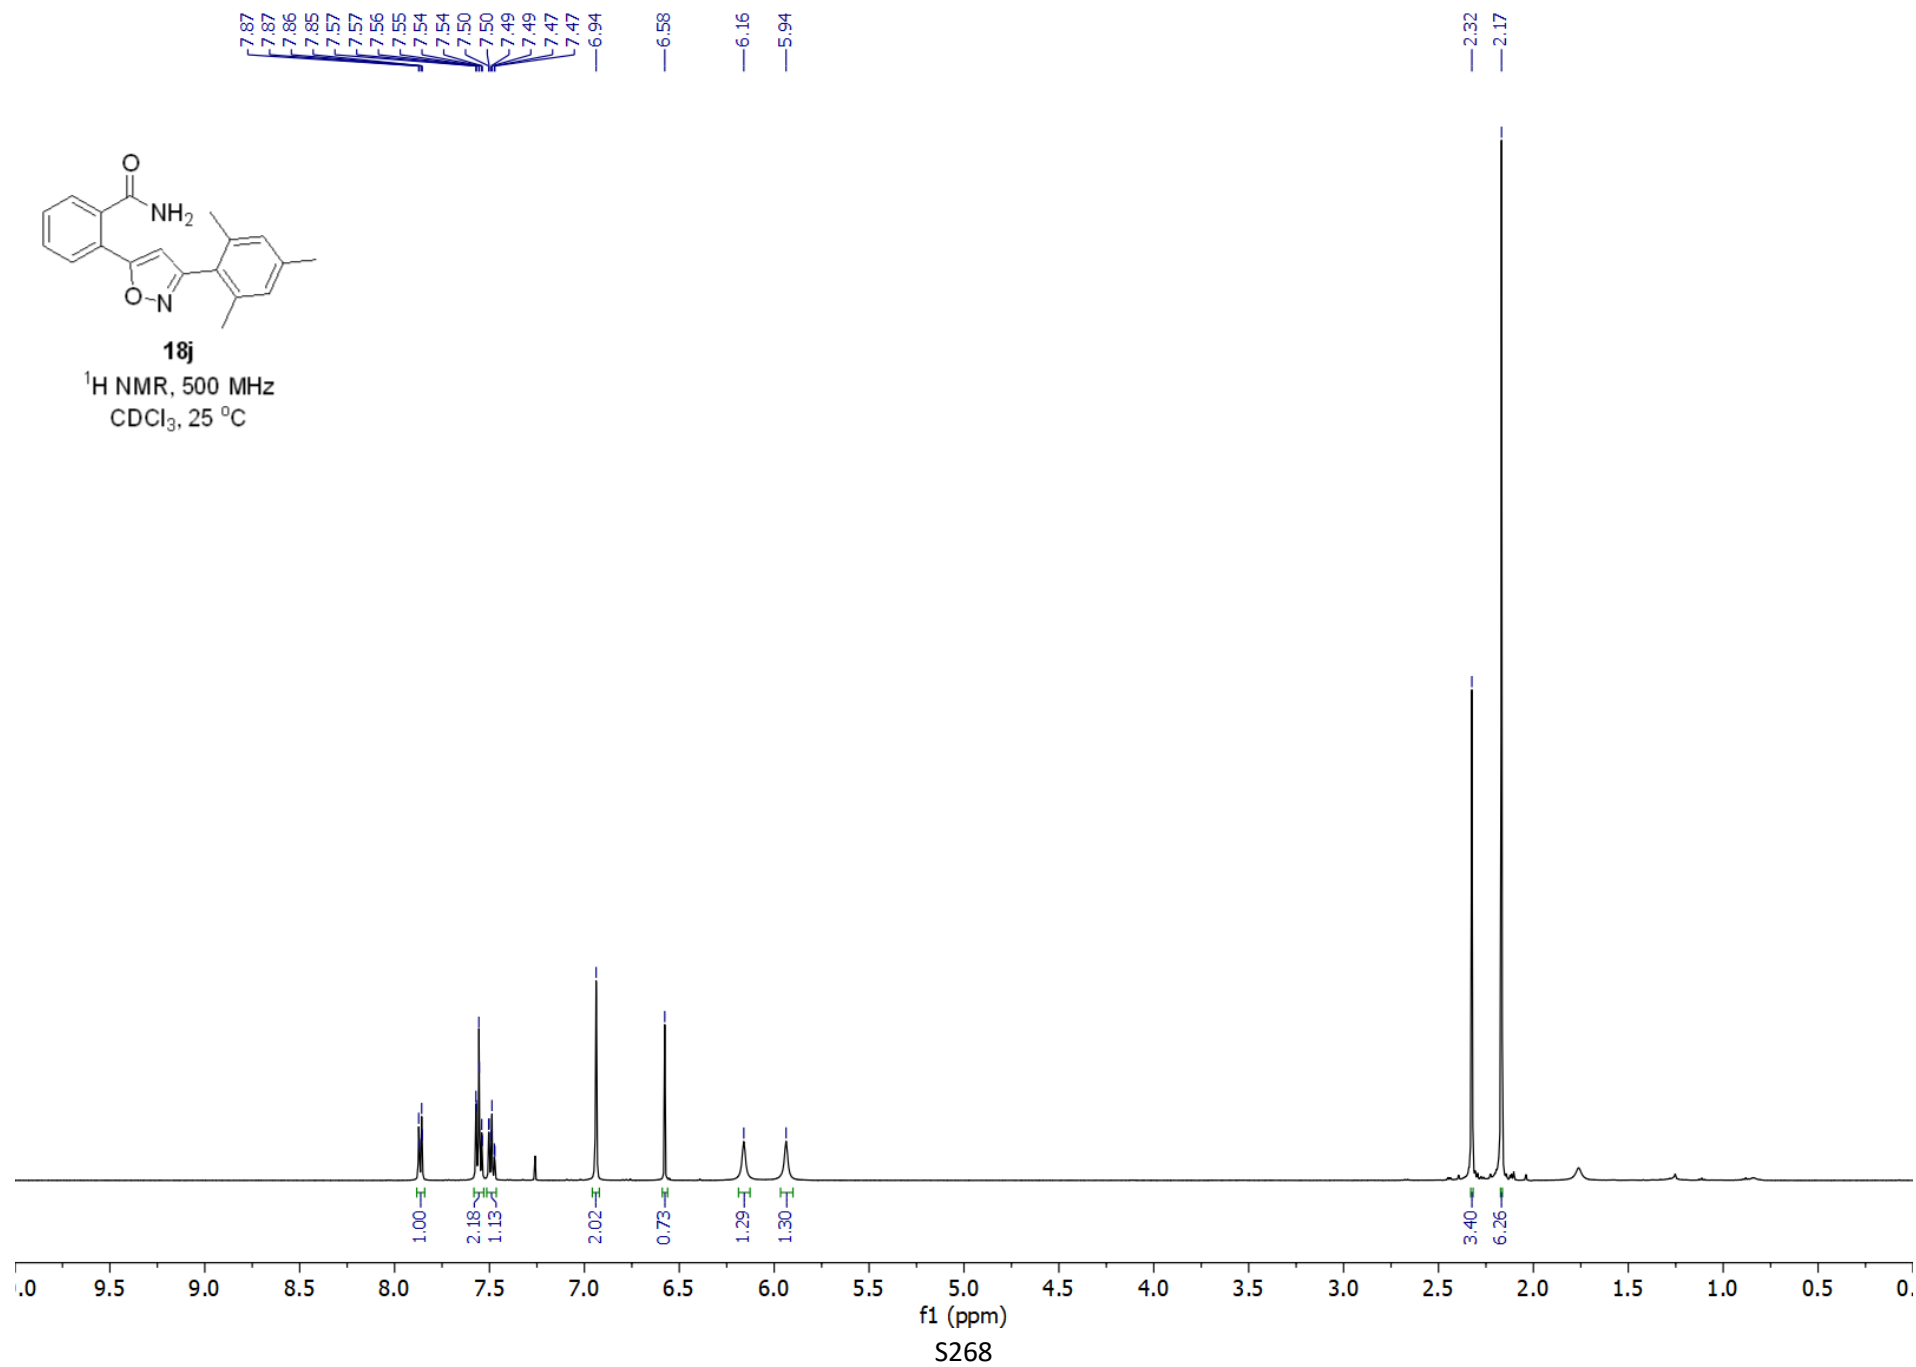

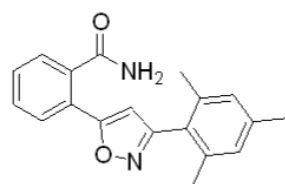

**18j**

$^{13}\text{C}$  NMR, 125 MHz

$\text{CDCl}_3$ , 25  $^\circ\text{C}$

171.20  
167.42  
162.75

138.90  
137.17  
134.98  
130.35  
130.09  
130.66  
128.40  
128.66  
127.77  
125.86  
124.90

104.78

21.16  
20.32

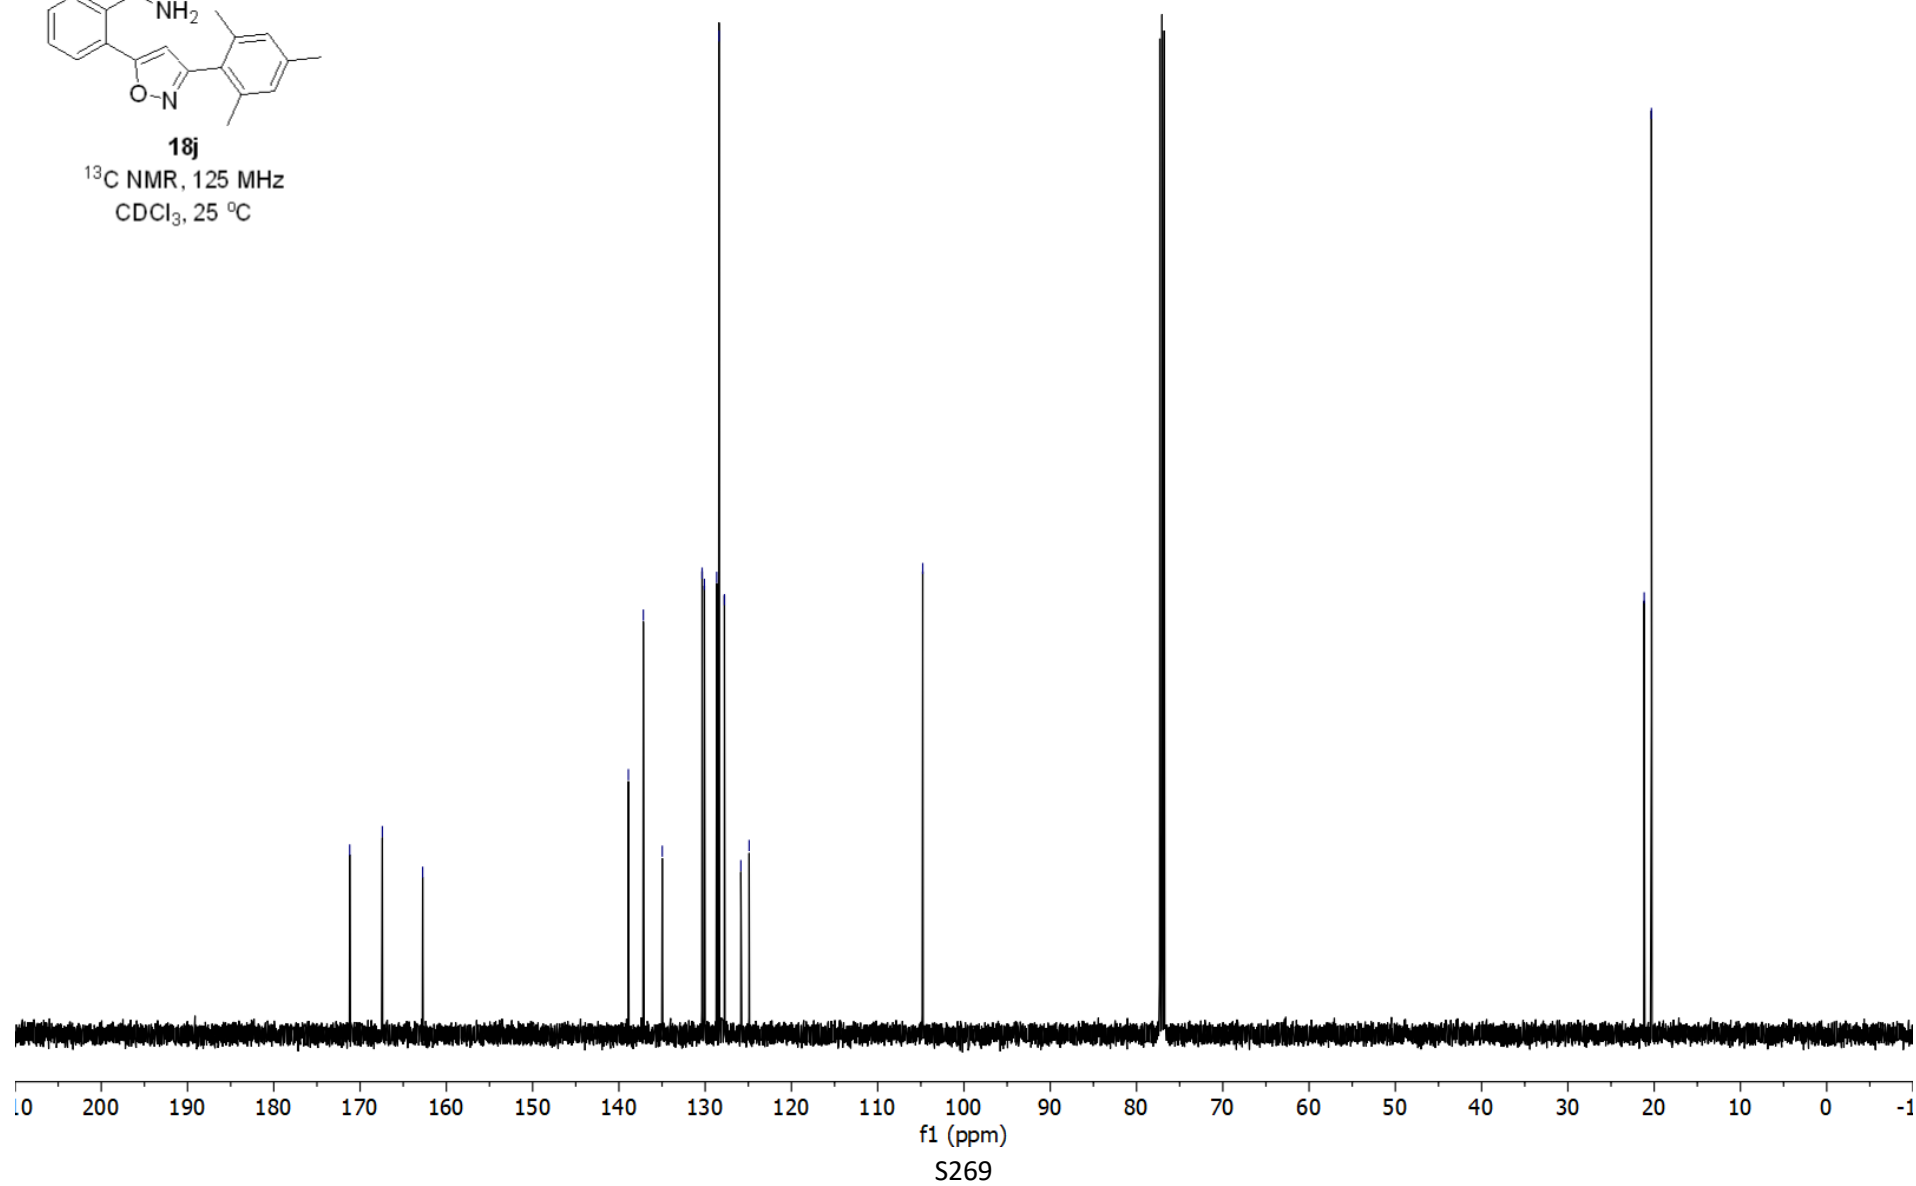

8.05  
7.89  
7.88  
7.87  
7.87  
7.86  
7.85  
7.85  
7.84  
7.63  
7.62  
7.62  
7.61  
7.60  
7.60  
7.58  
7.58  
7.57  
7.57  
7.56  
7.55  
7.16

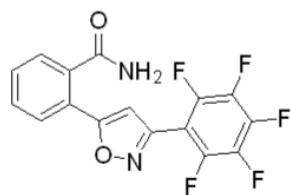

**18k**

$^1\text{H}$  NMR, 500 MHz  
DMSO- $d_6$ , 25  $^\circ\text{C}$

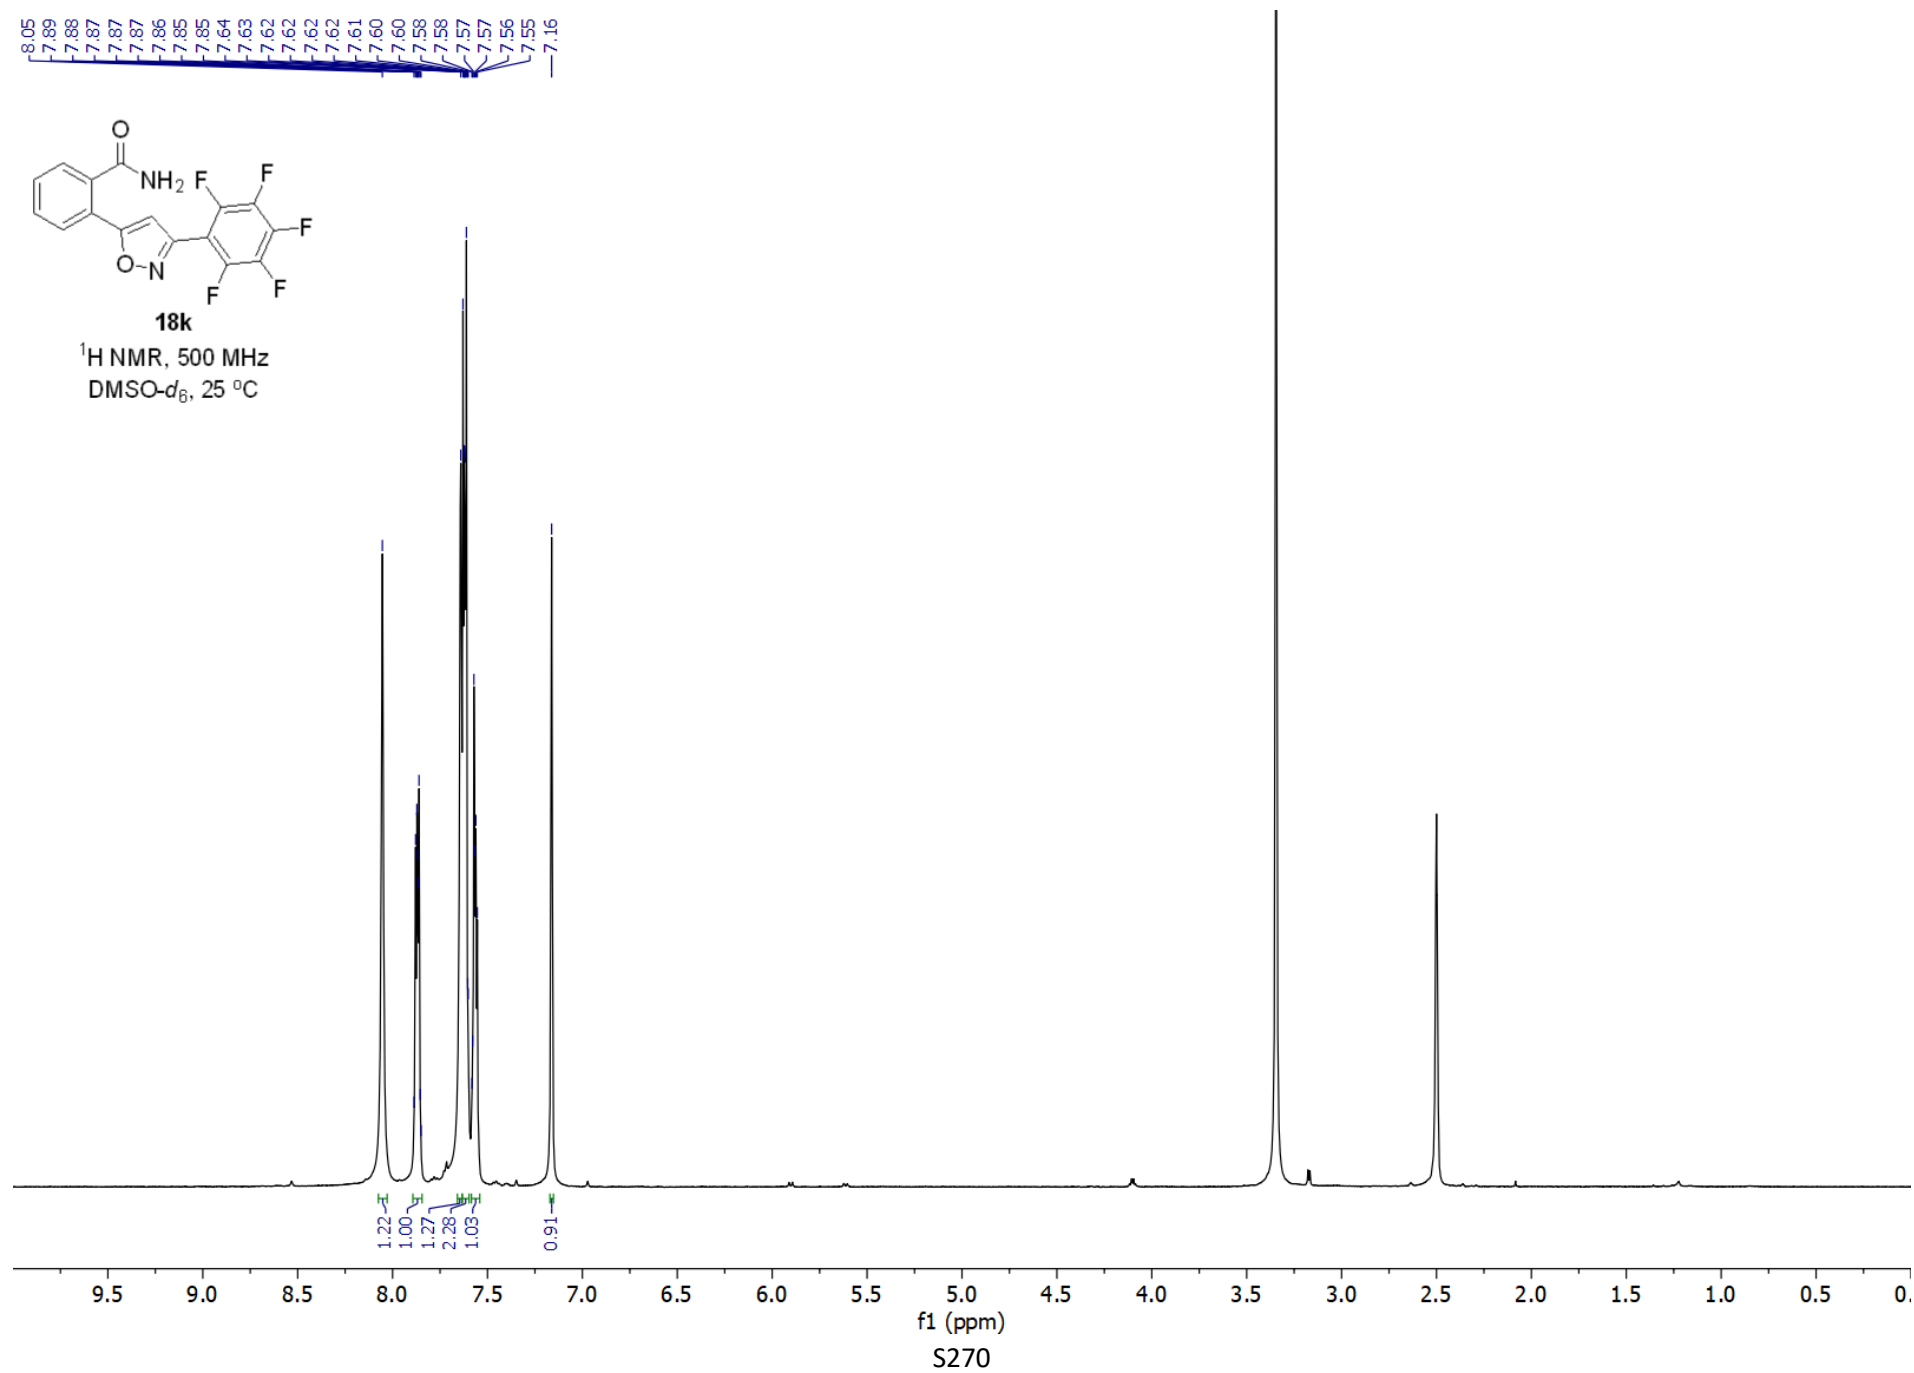

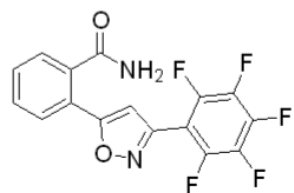

**18k**

$^{13}\text{C}$  NMR, 125 MHz  
DMSO- $d_6$ , 25 °C

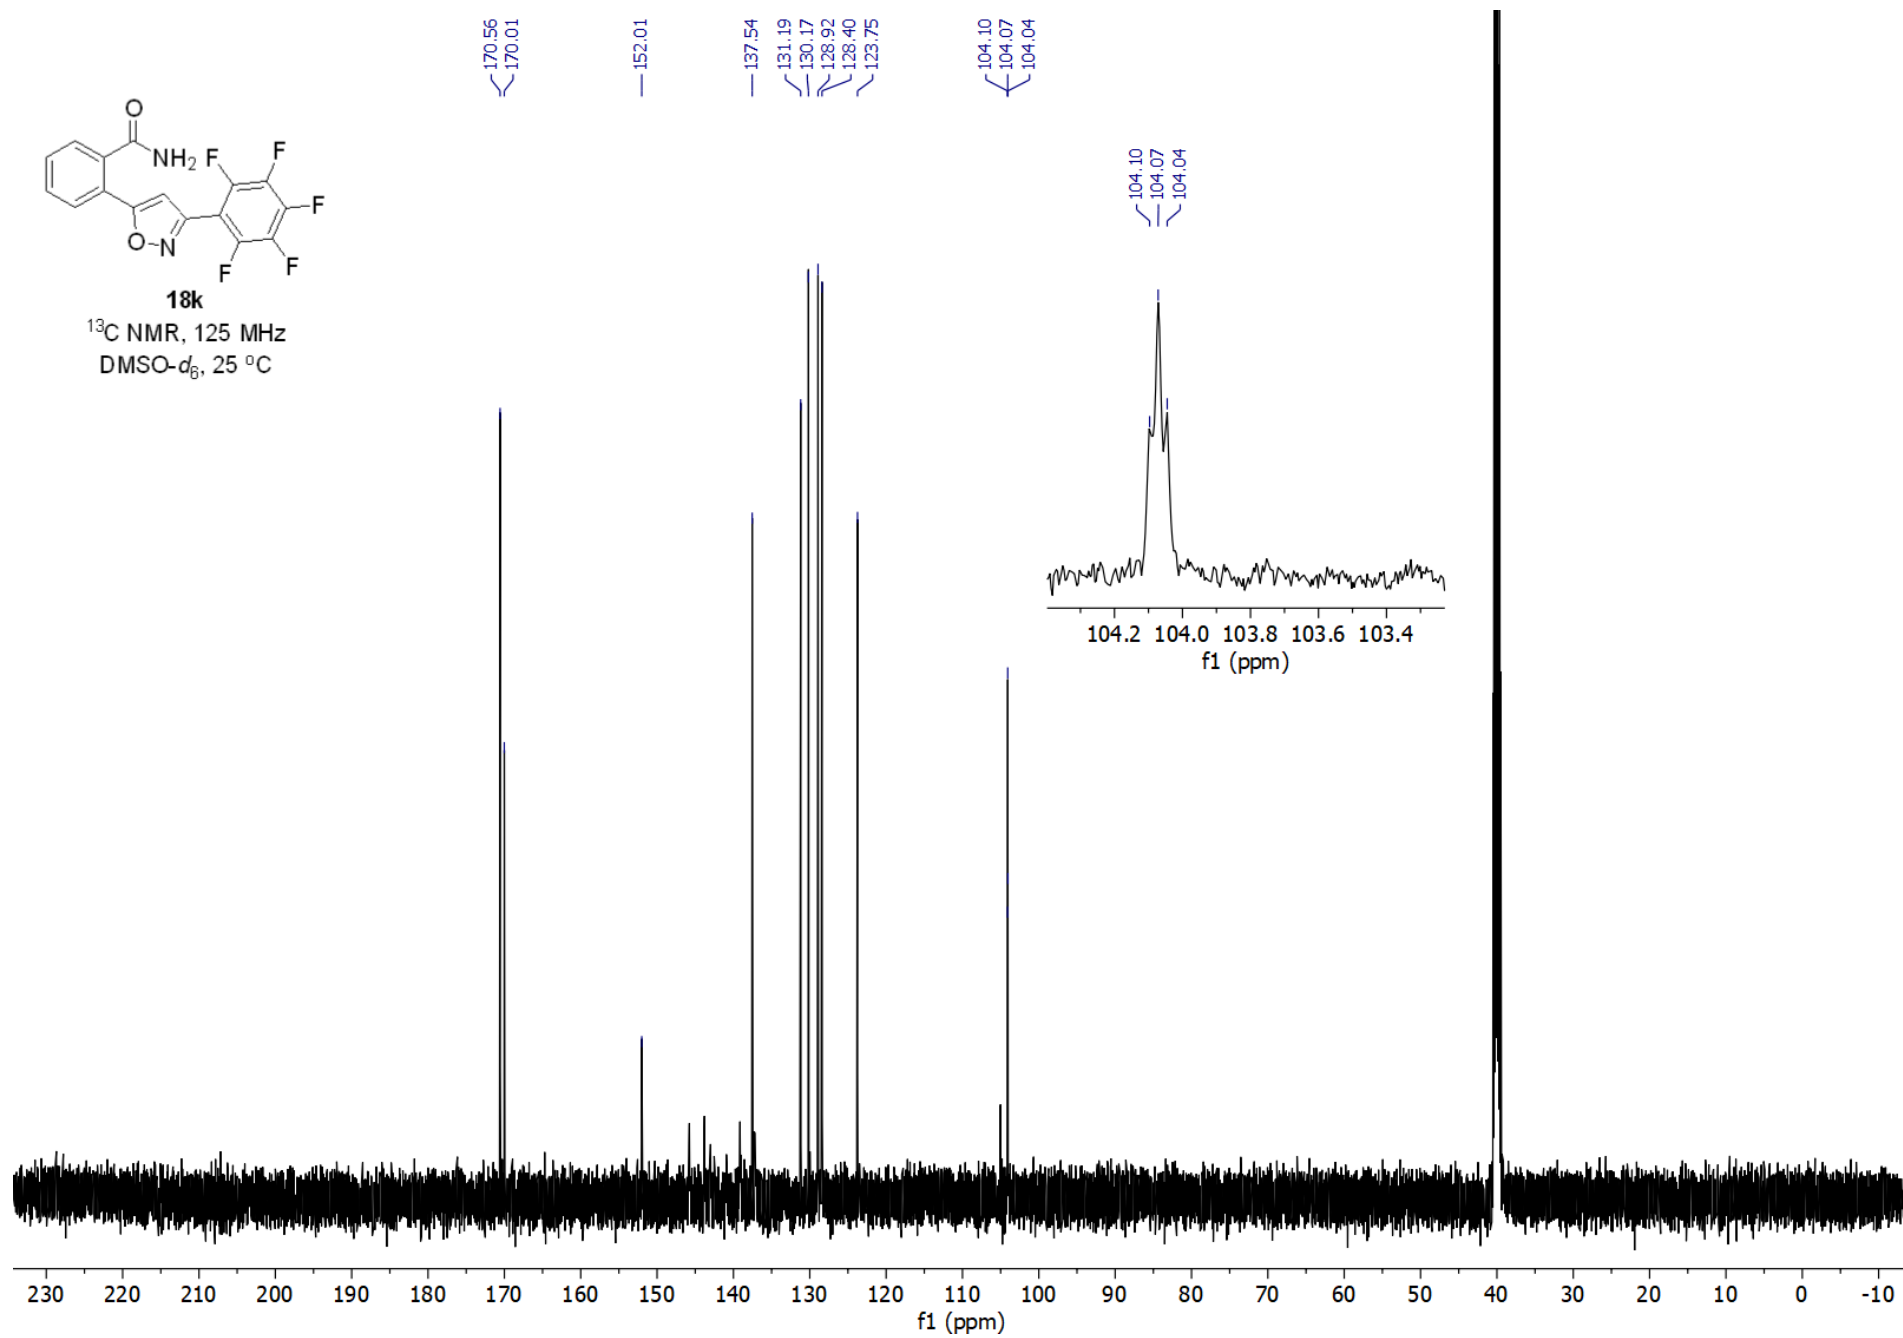

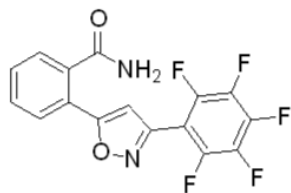

**18k**

$^{19}\text{F}$  NMR, 470 MHz

$\text{DMSO-}d_6$ , 25 °C

139.18  
139.20  
139.23  
139.25  
151.80  
151.85  
151.90  
151.90  
161.50  
161.51  
161.52  
161.55  
161.57  
161.60  
161.61  
161.62

1.97

1.00

2.01

1.97

1.00

2.01

f1 (ppm)

S272

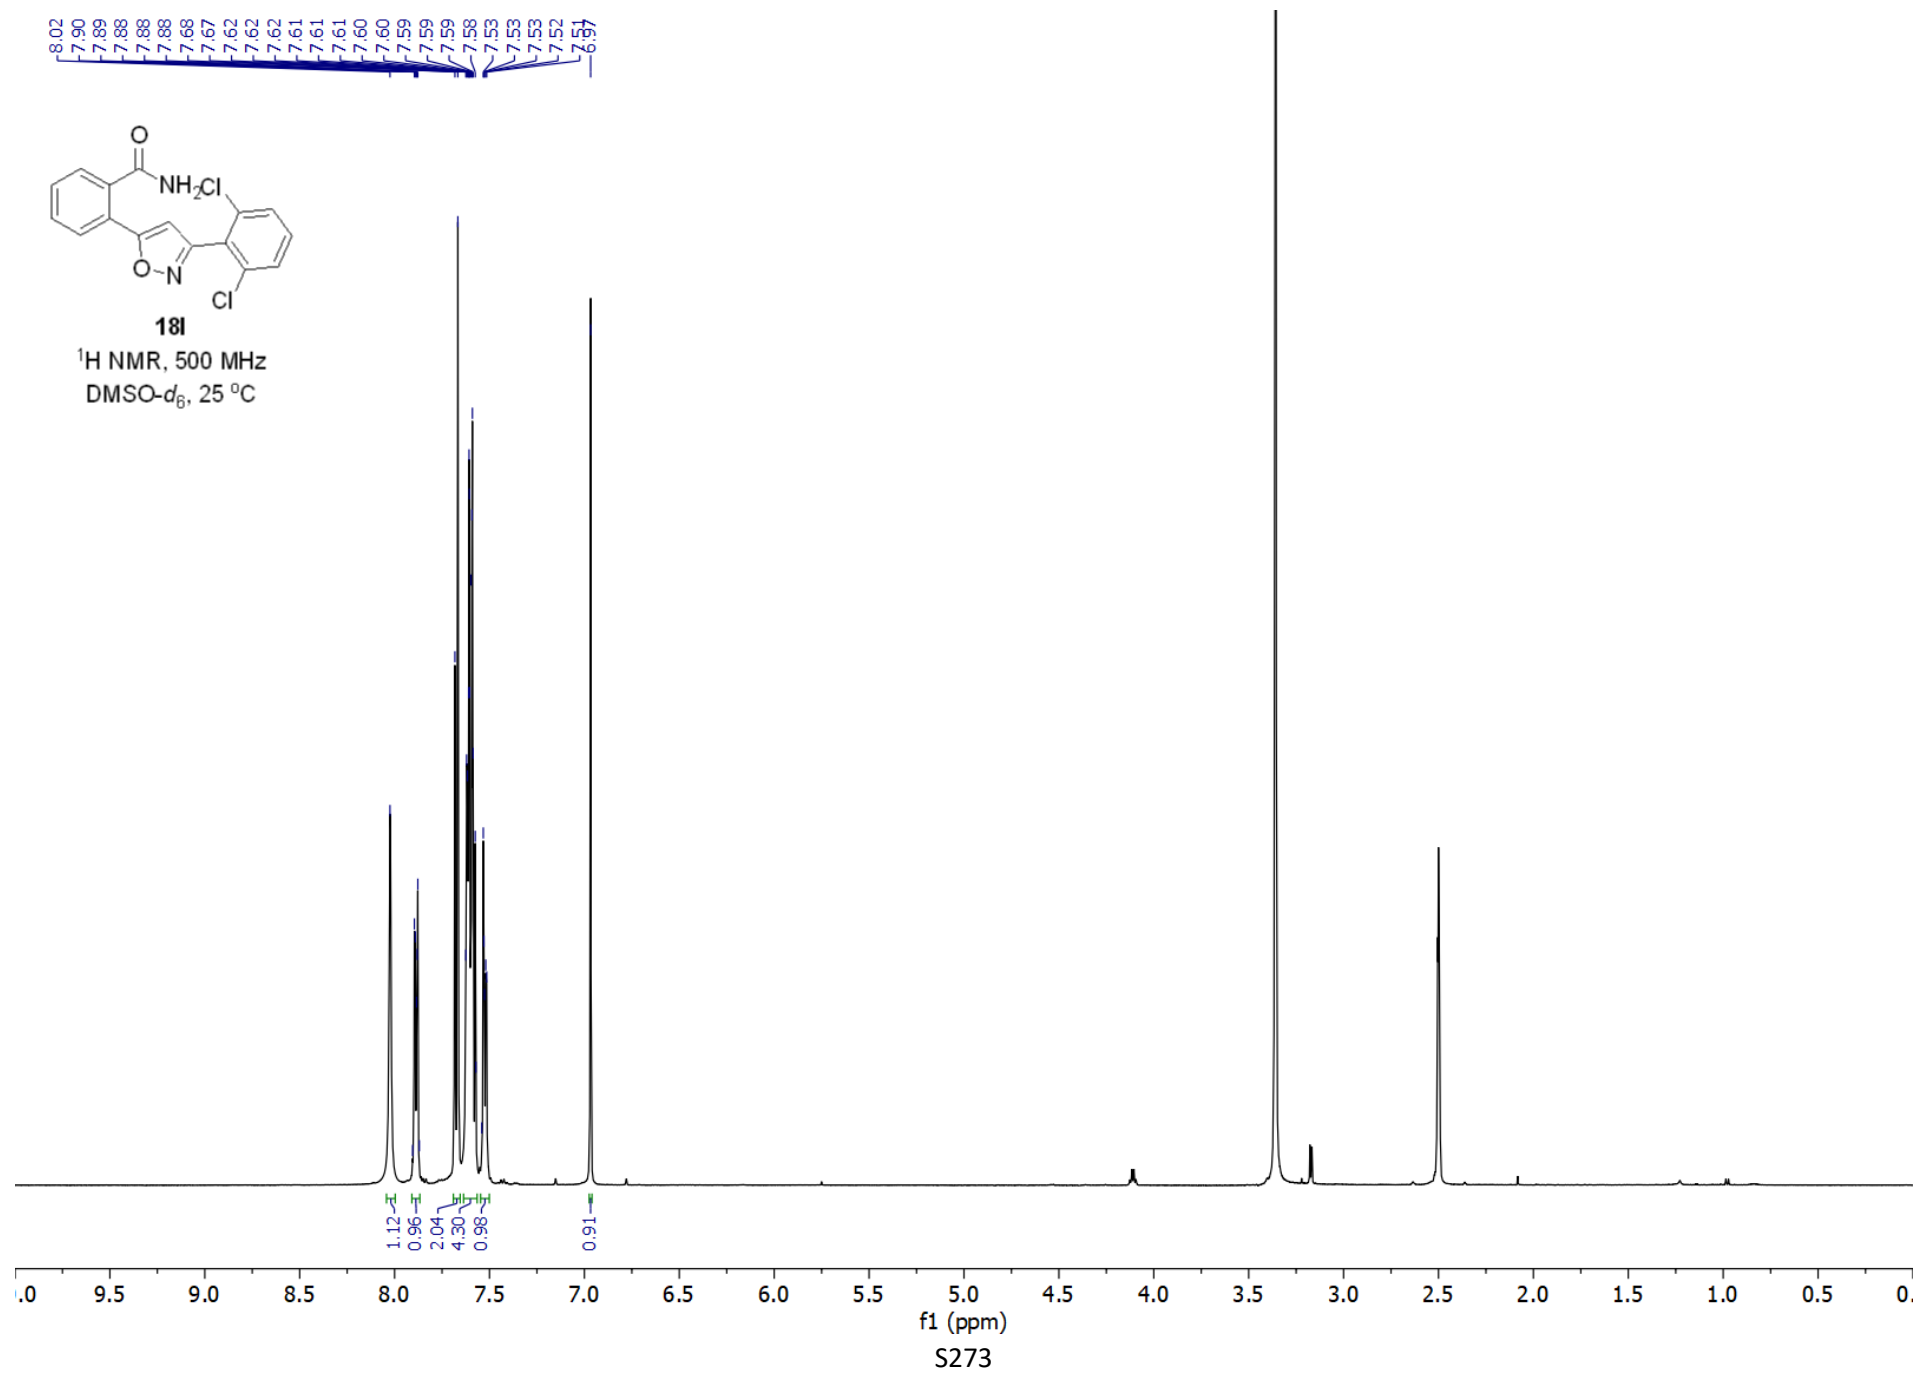

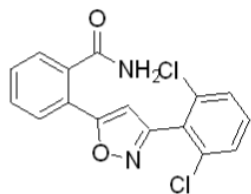

**18l**

$^{13}\text{C}$  NMR, 125 MHz  
DMSO- $d_6$ , 25 °C

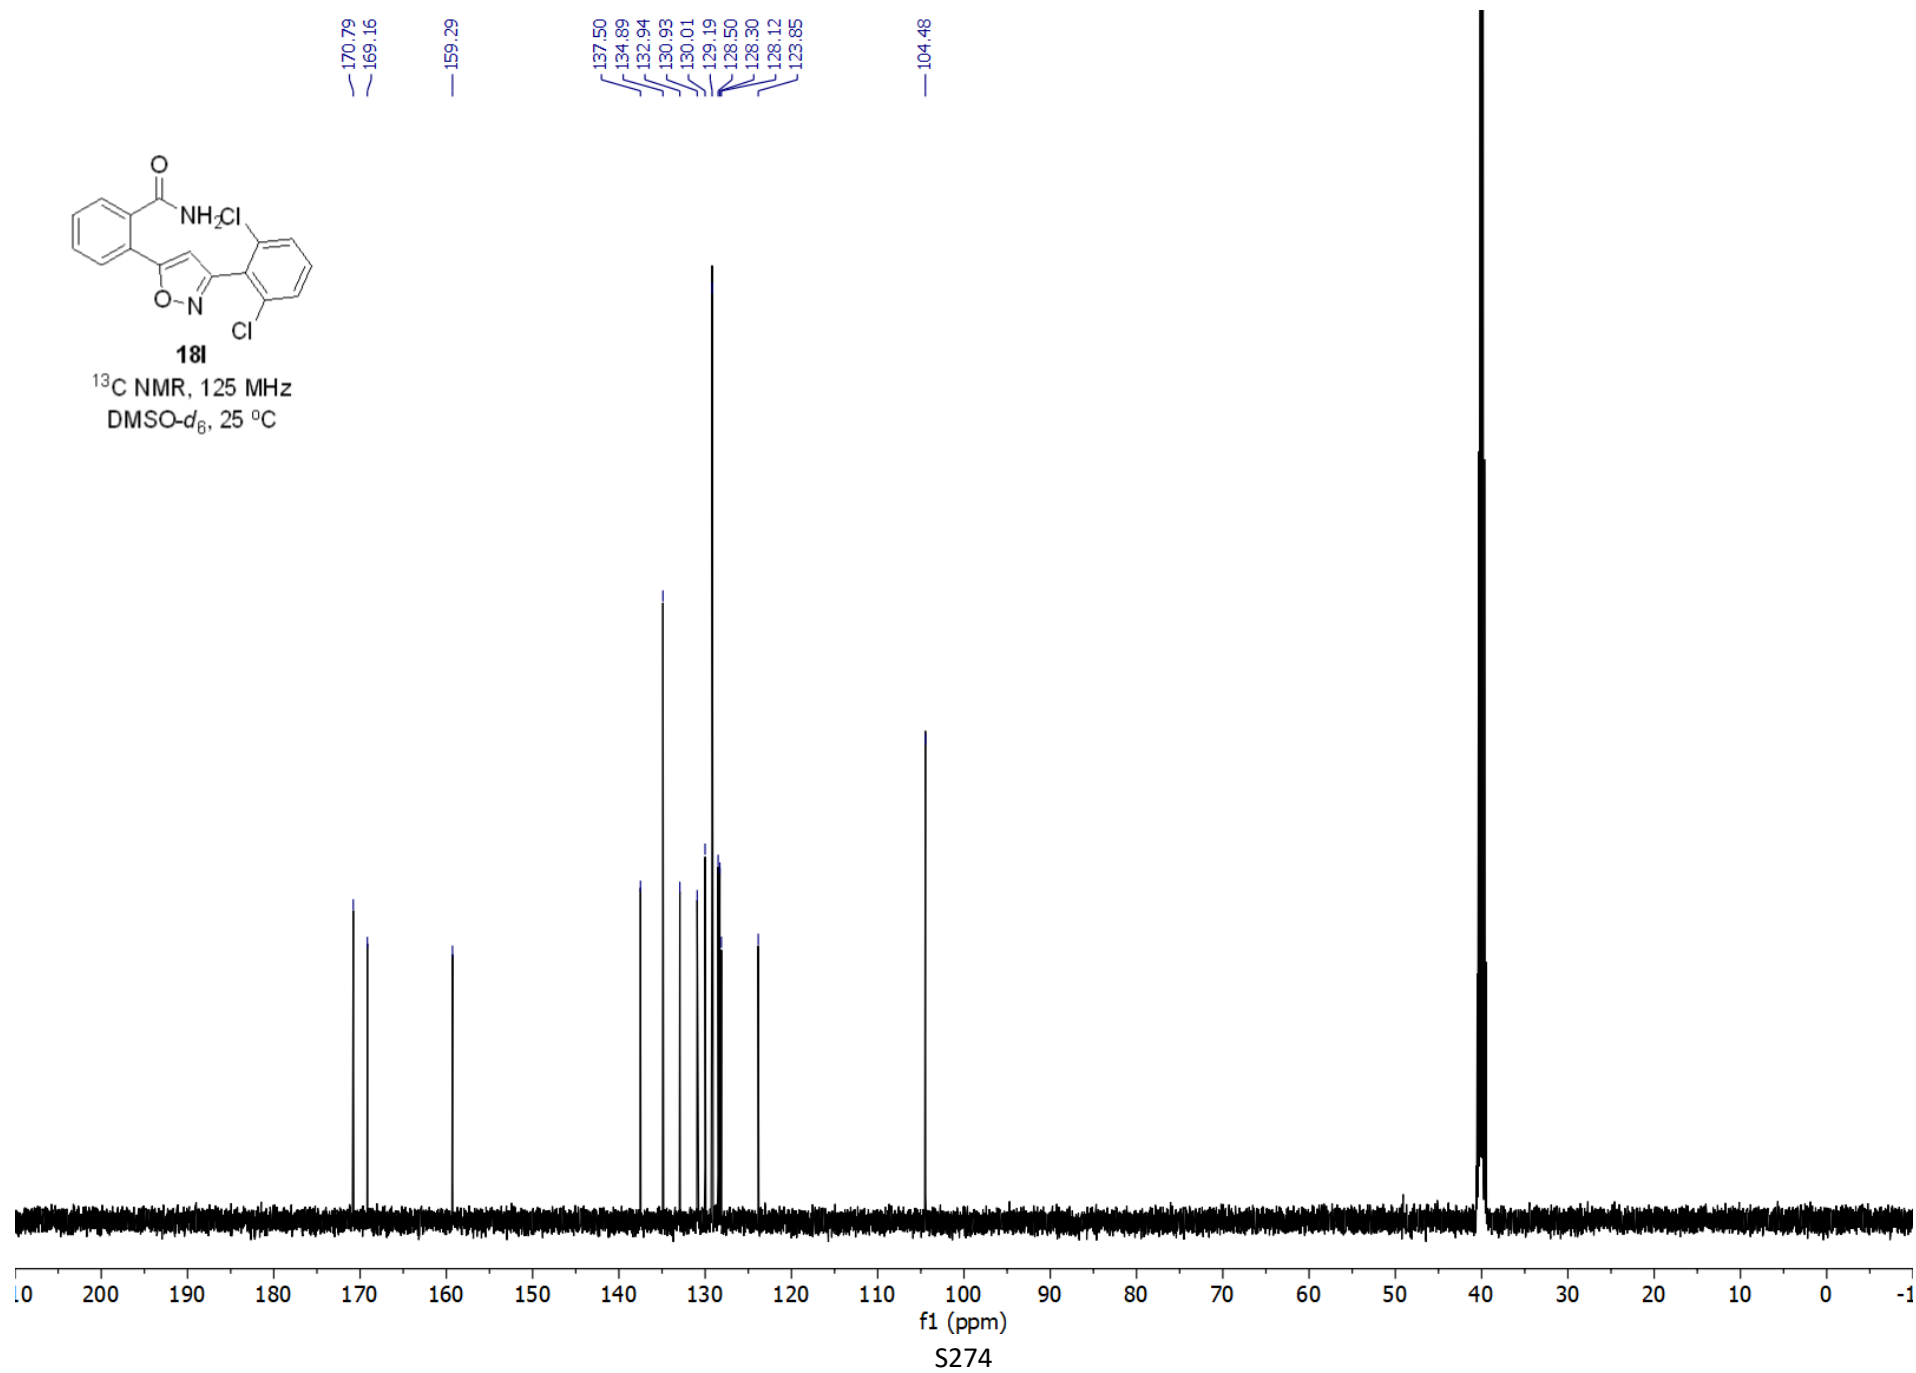

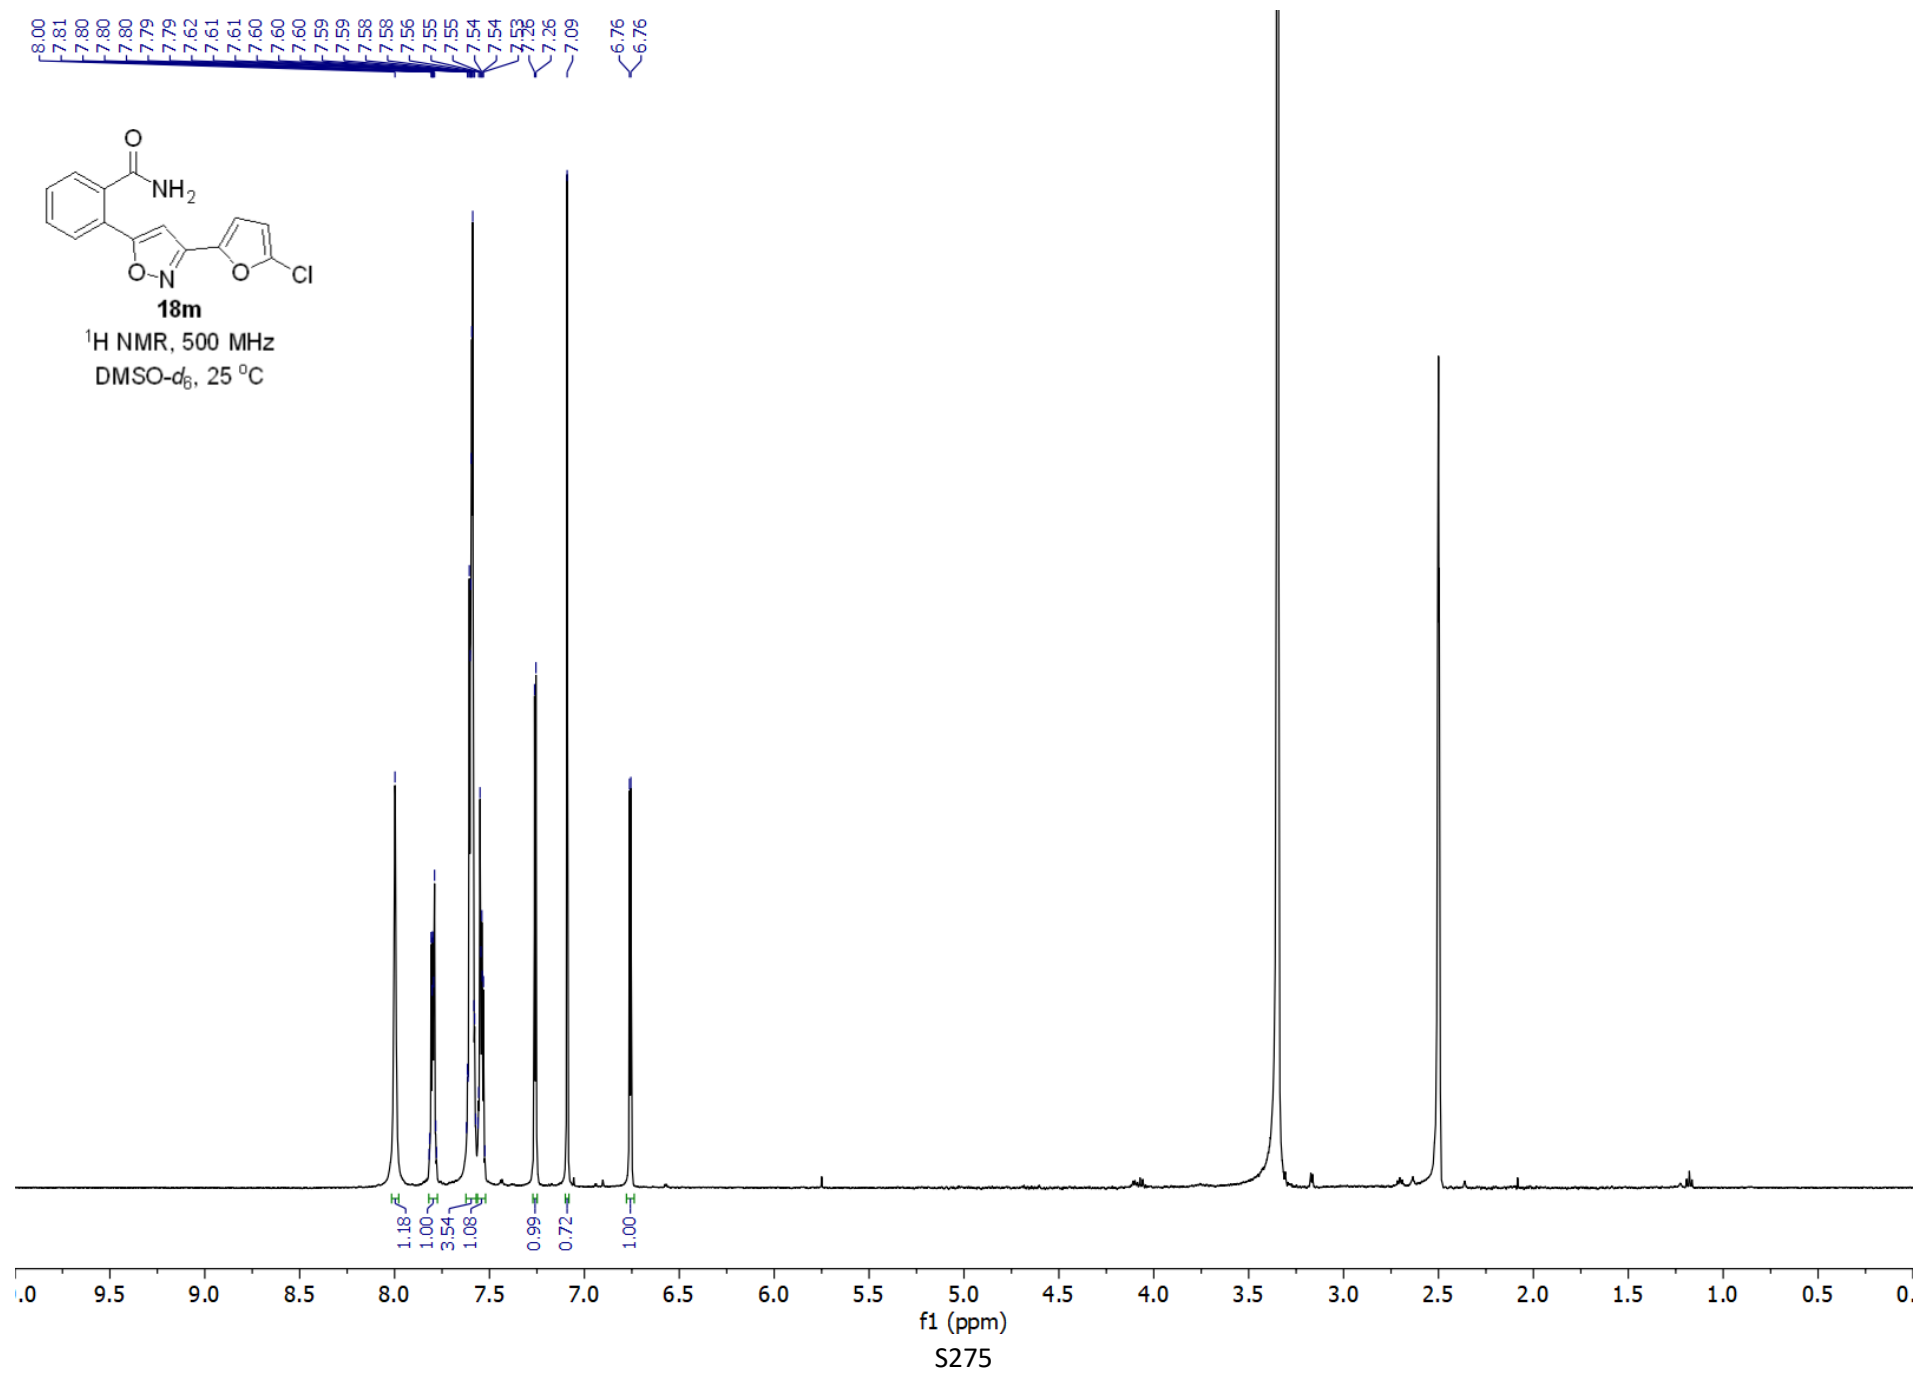

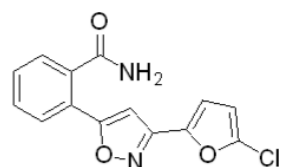

**18m**

$^{13}\text{C}$  NMR, 125 MHz  
DMSO- $d_6$ , 25 °C

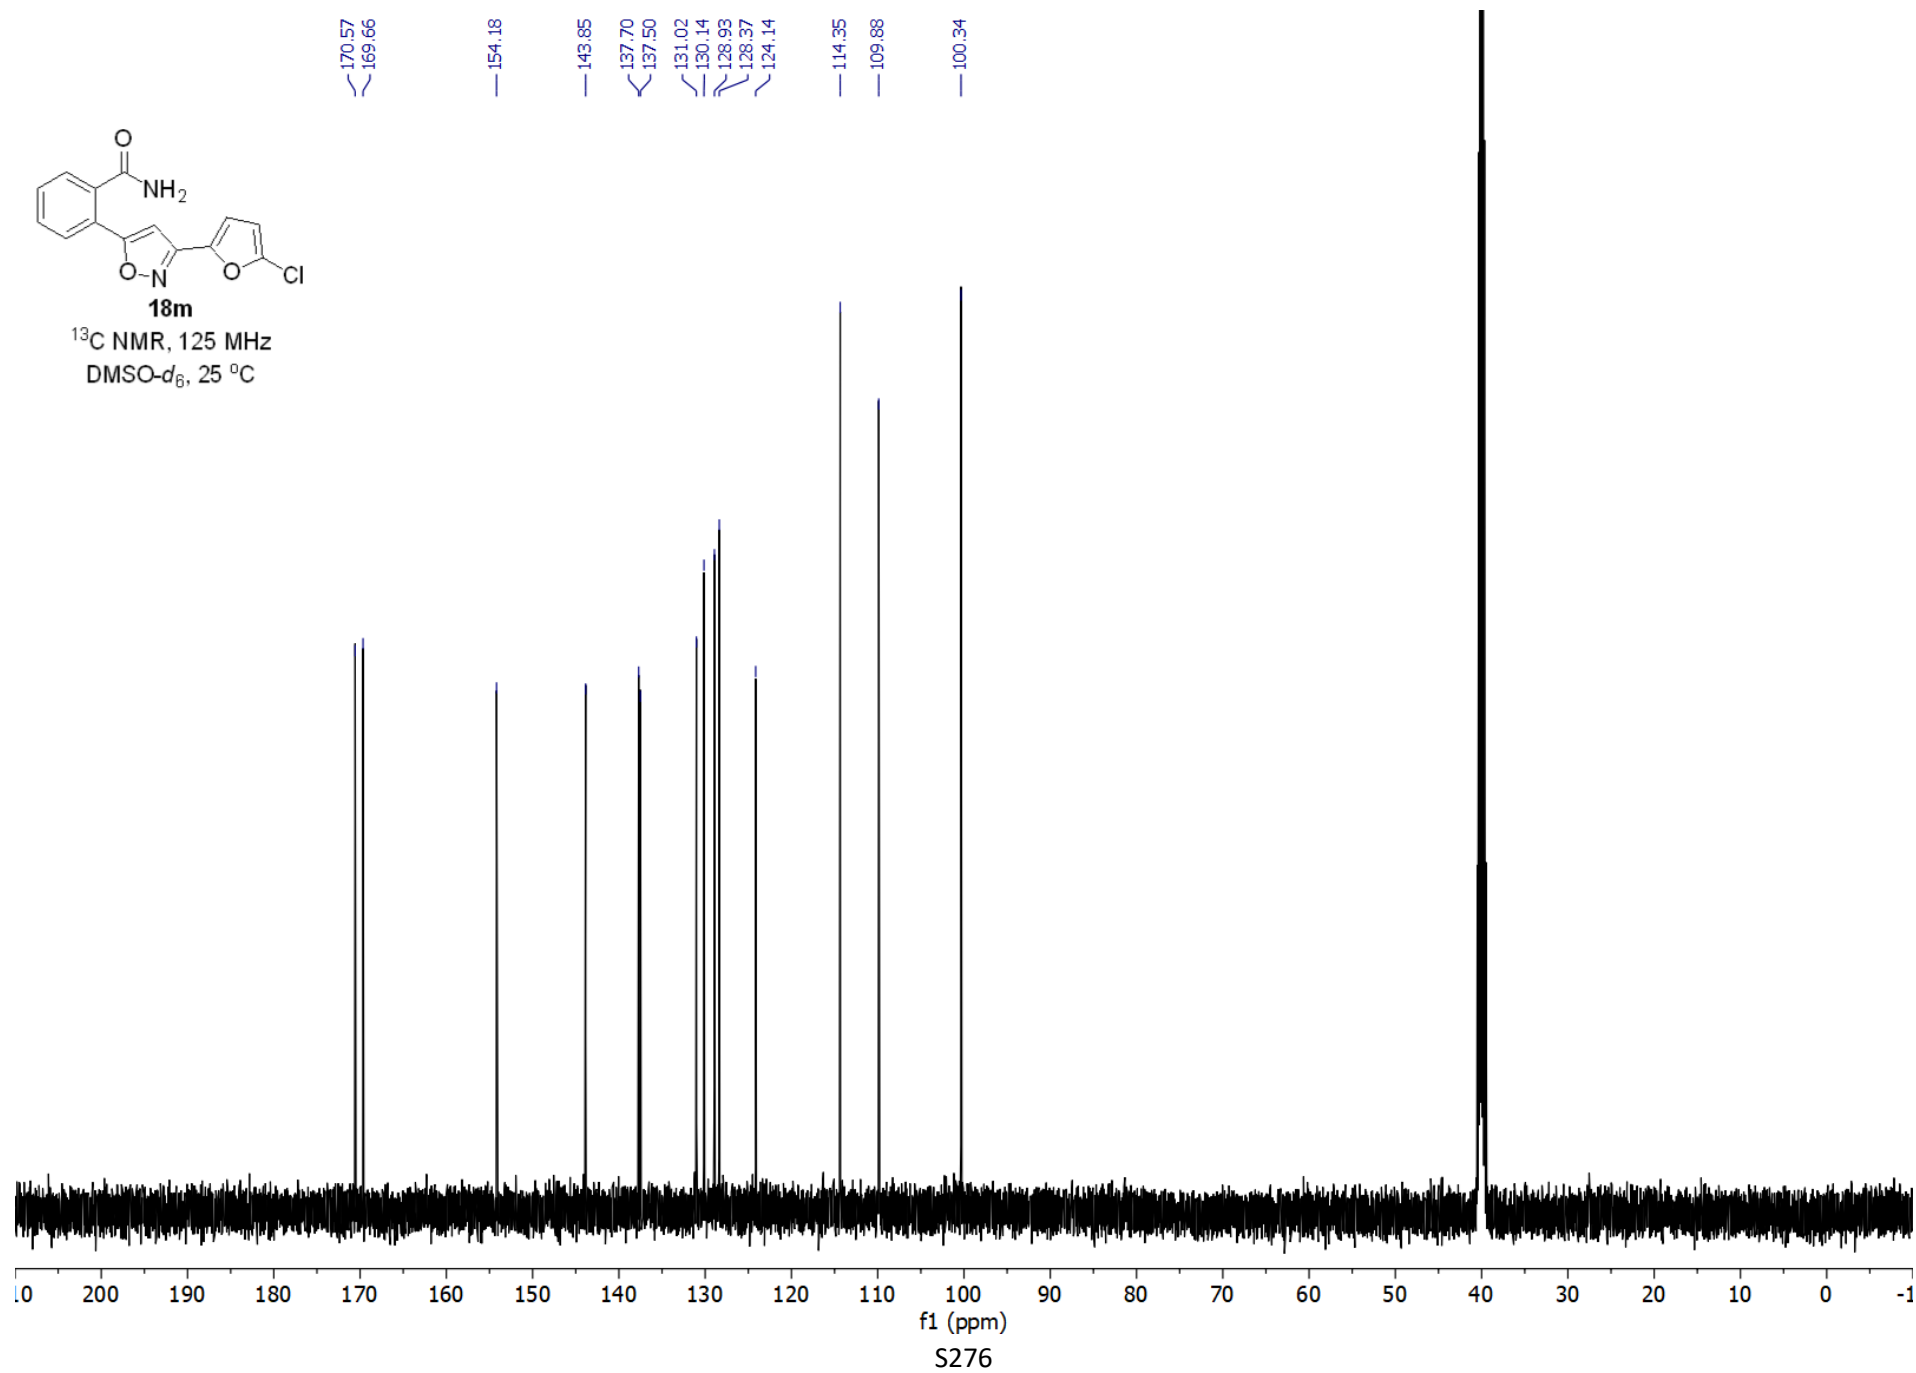

8.00  
7.80  
7.79  
7.79  
7.78  
7.78  
7.76  
7.75  
7.72  
7.71  
7.62  
7.61  
7.60  
7.60  
7.59  
7.59  
7.57  
7.56  
7.56  
7.55  
7.55  
7.54  
7.24  
7.24  
7.23  
7.19

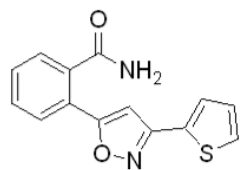

**18n**

$^1\text{H}$  NMR, 500 MHz

DMSO- $d_6$ , 25 °C

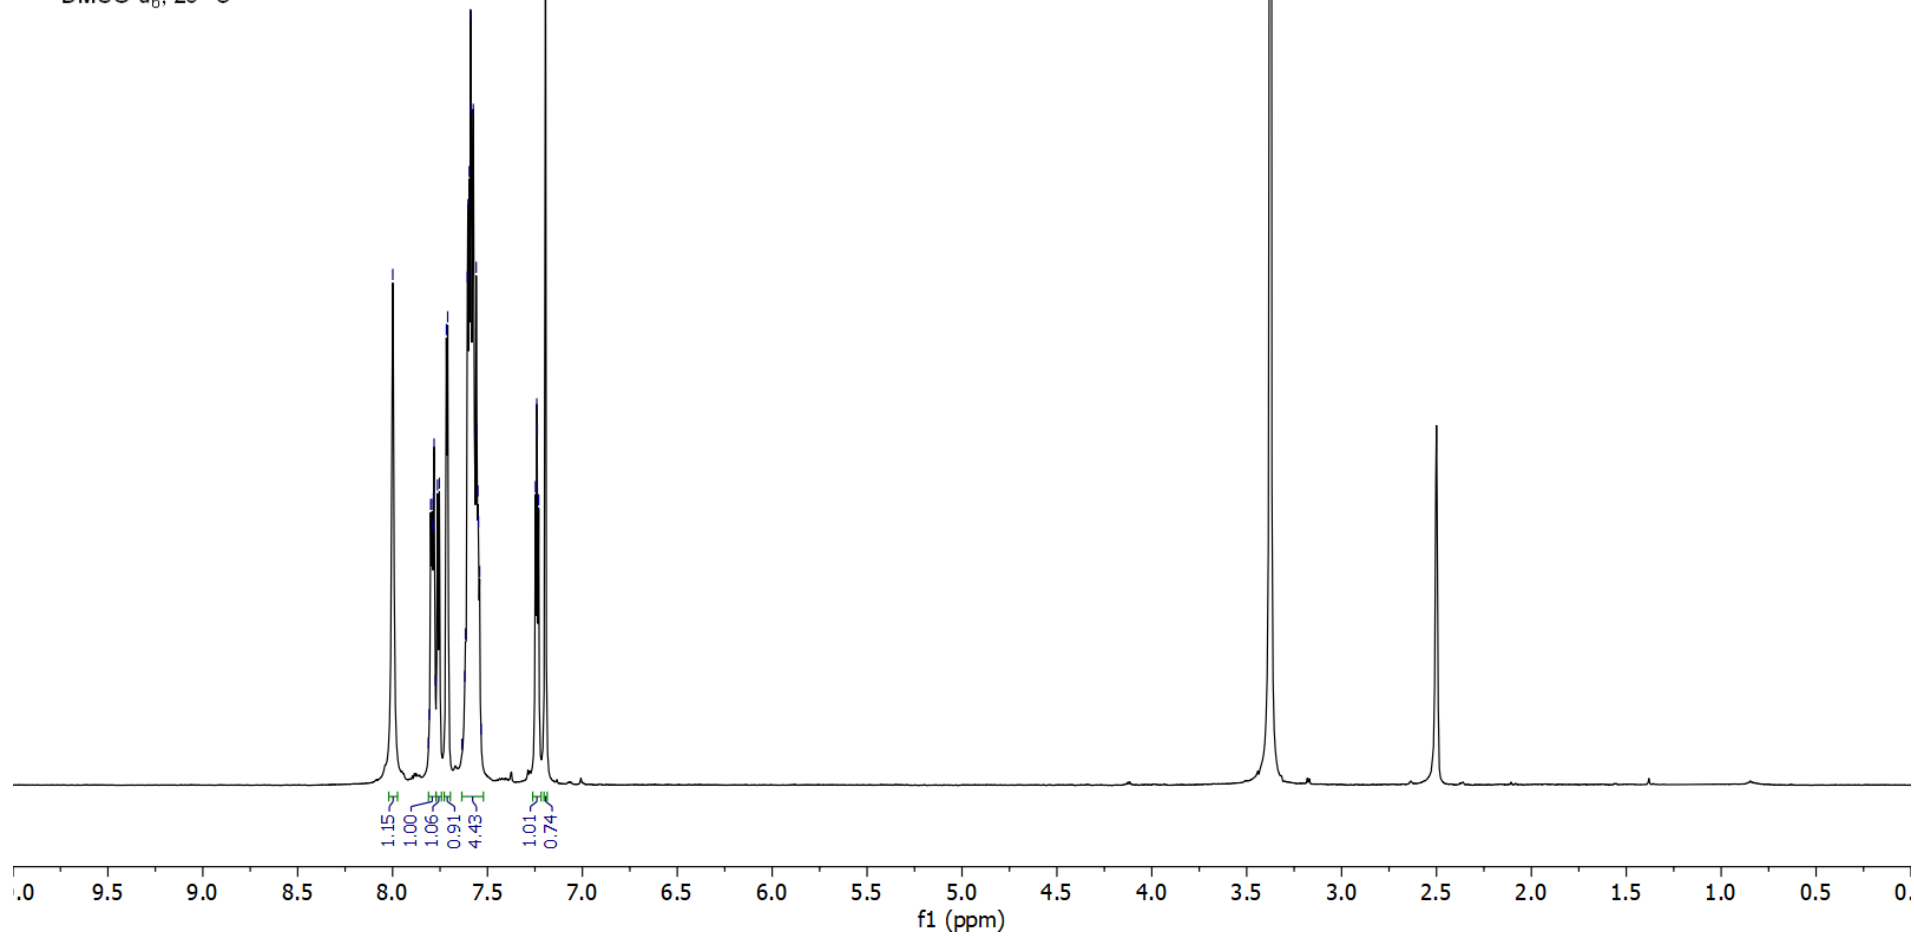

S277

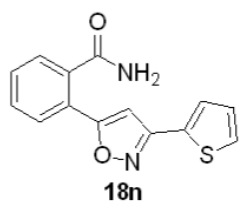

$^{13}\text{C}$  NMR, 125 MHz  
DMSO- $d_6$ , 25 °C

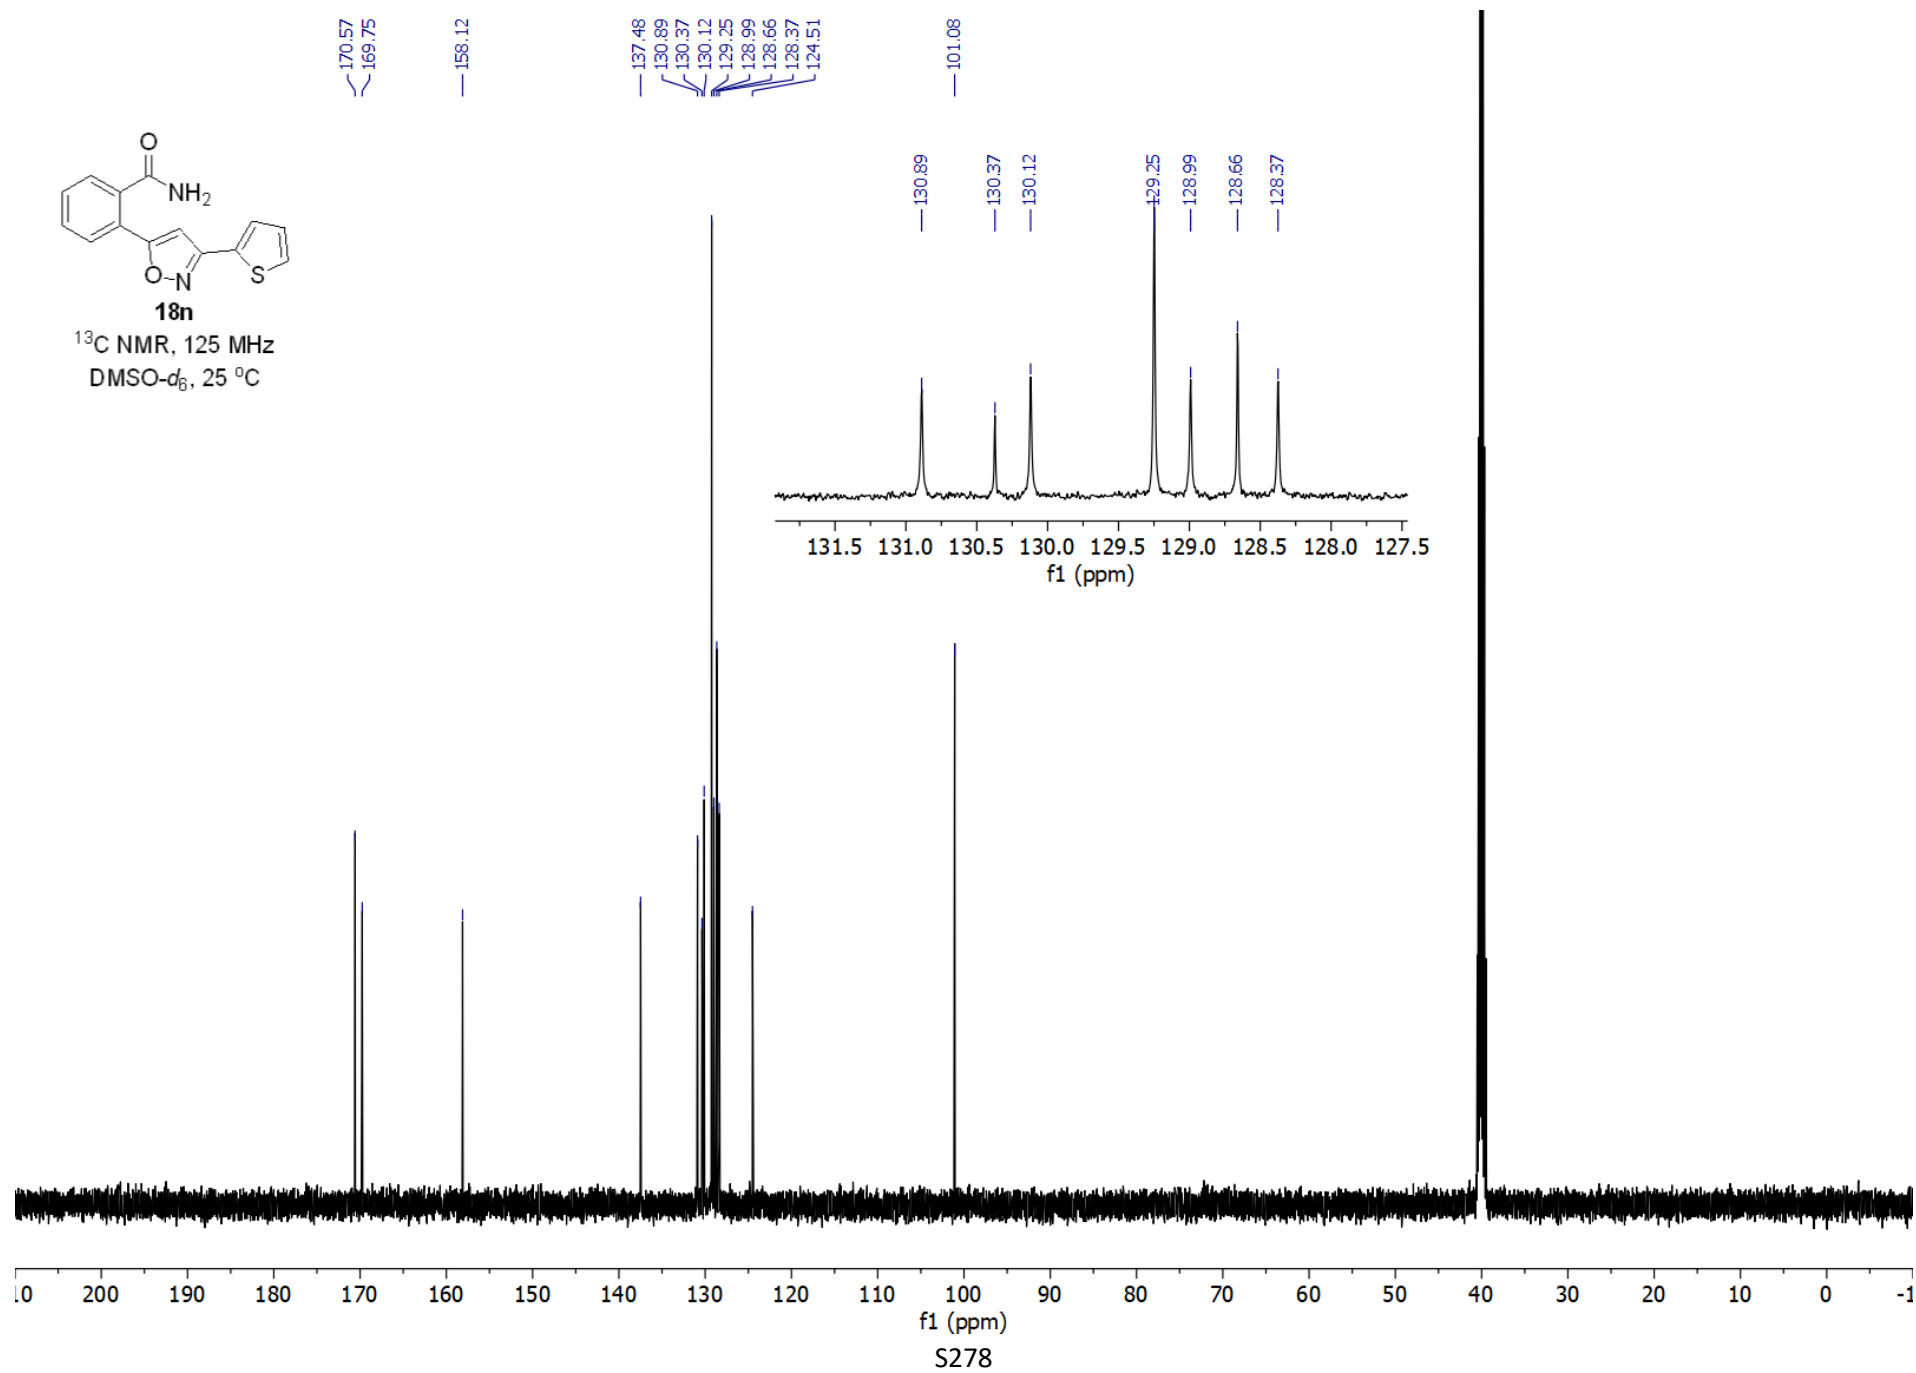

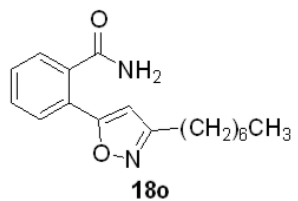

<sup>1</sup>H NMR, 500 MHz  
DMSO-*d*<sub>6</sub>, 25 °C

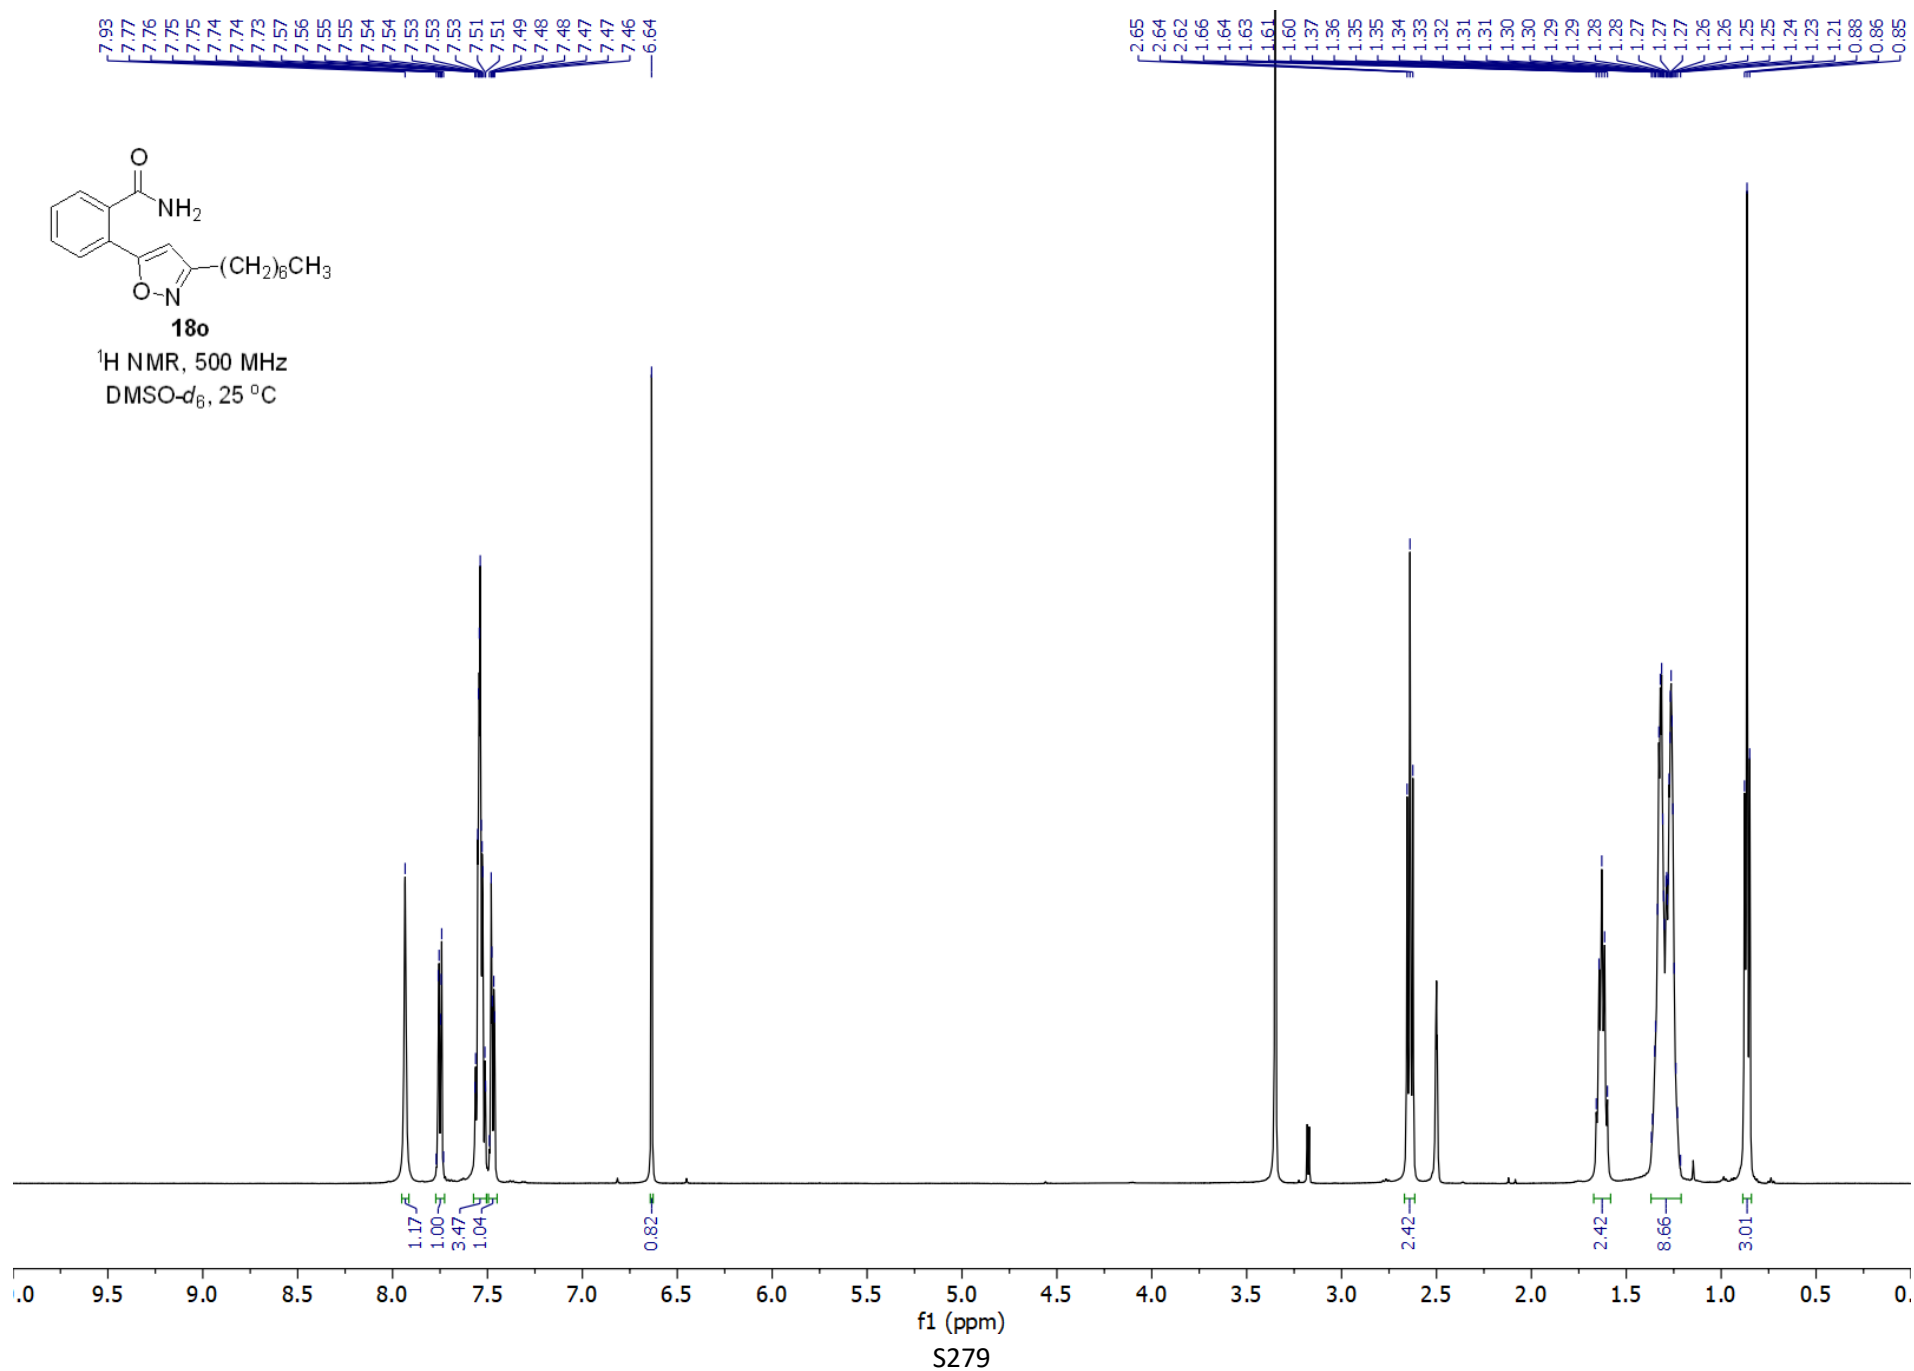

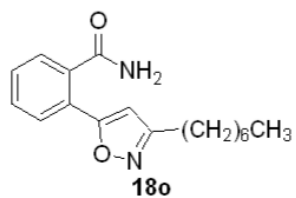

$^{13}\text{C}$  NMR, 125 MHz  
DMSO- $d_6$ , 25 °C

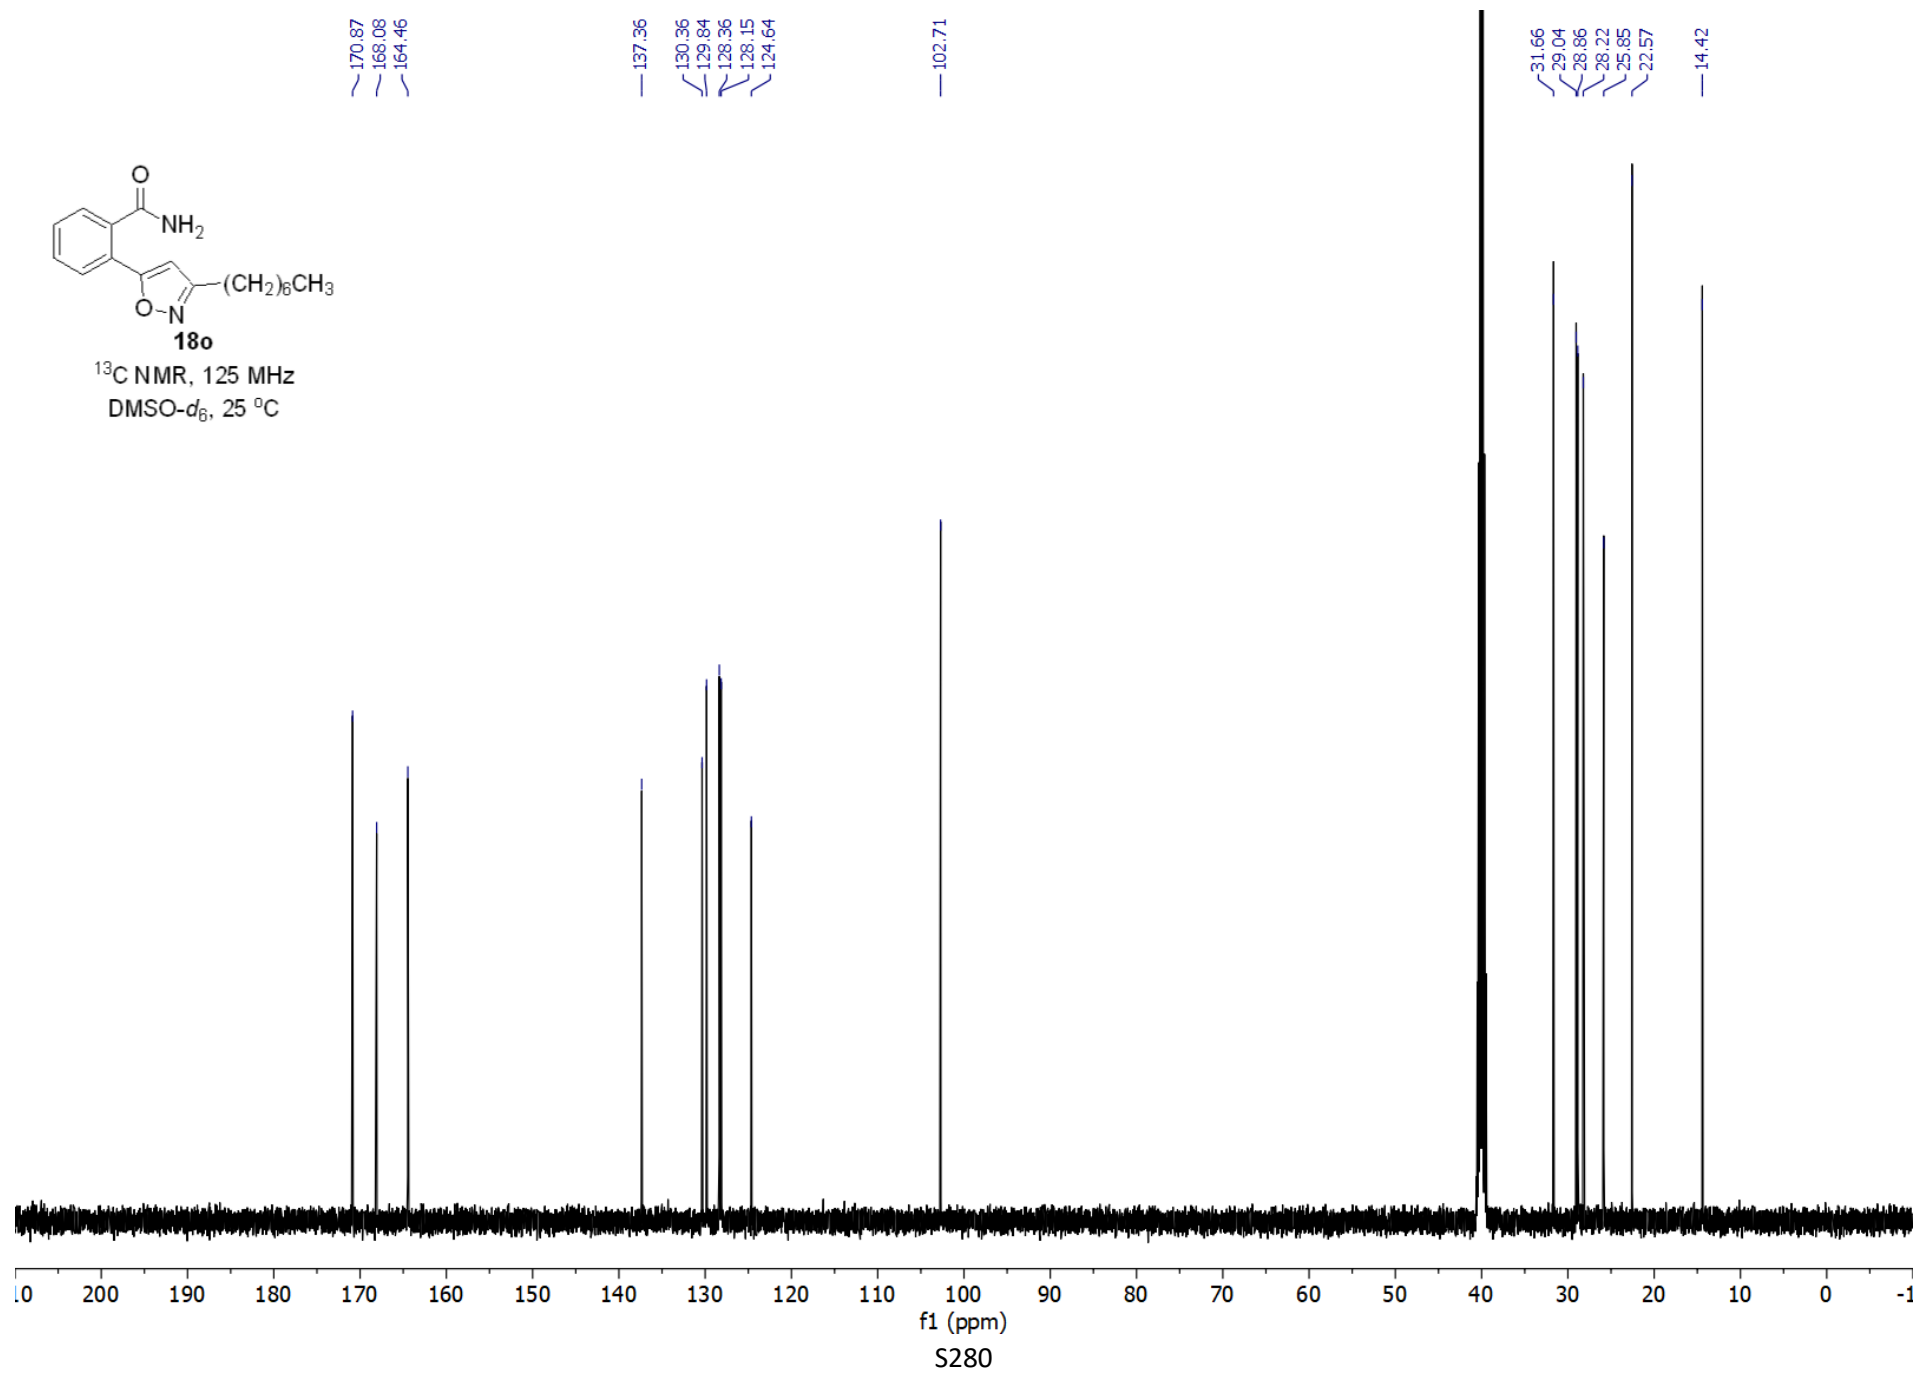

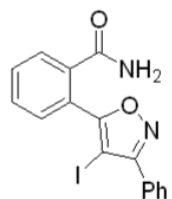

**22a**

$^1\text{H}$  NMR, 500 MHz  
DMSO- $d_6$ , 25 °C

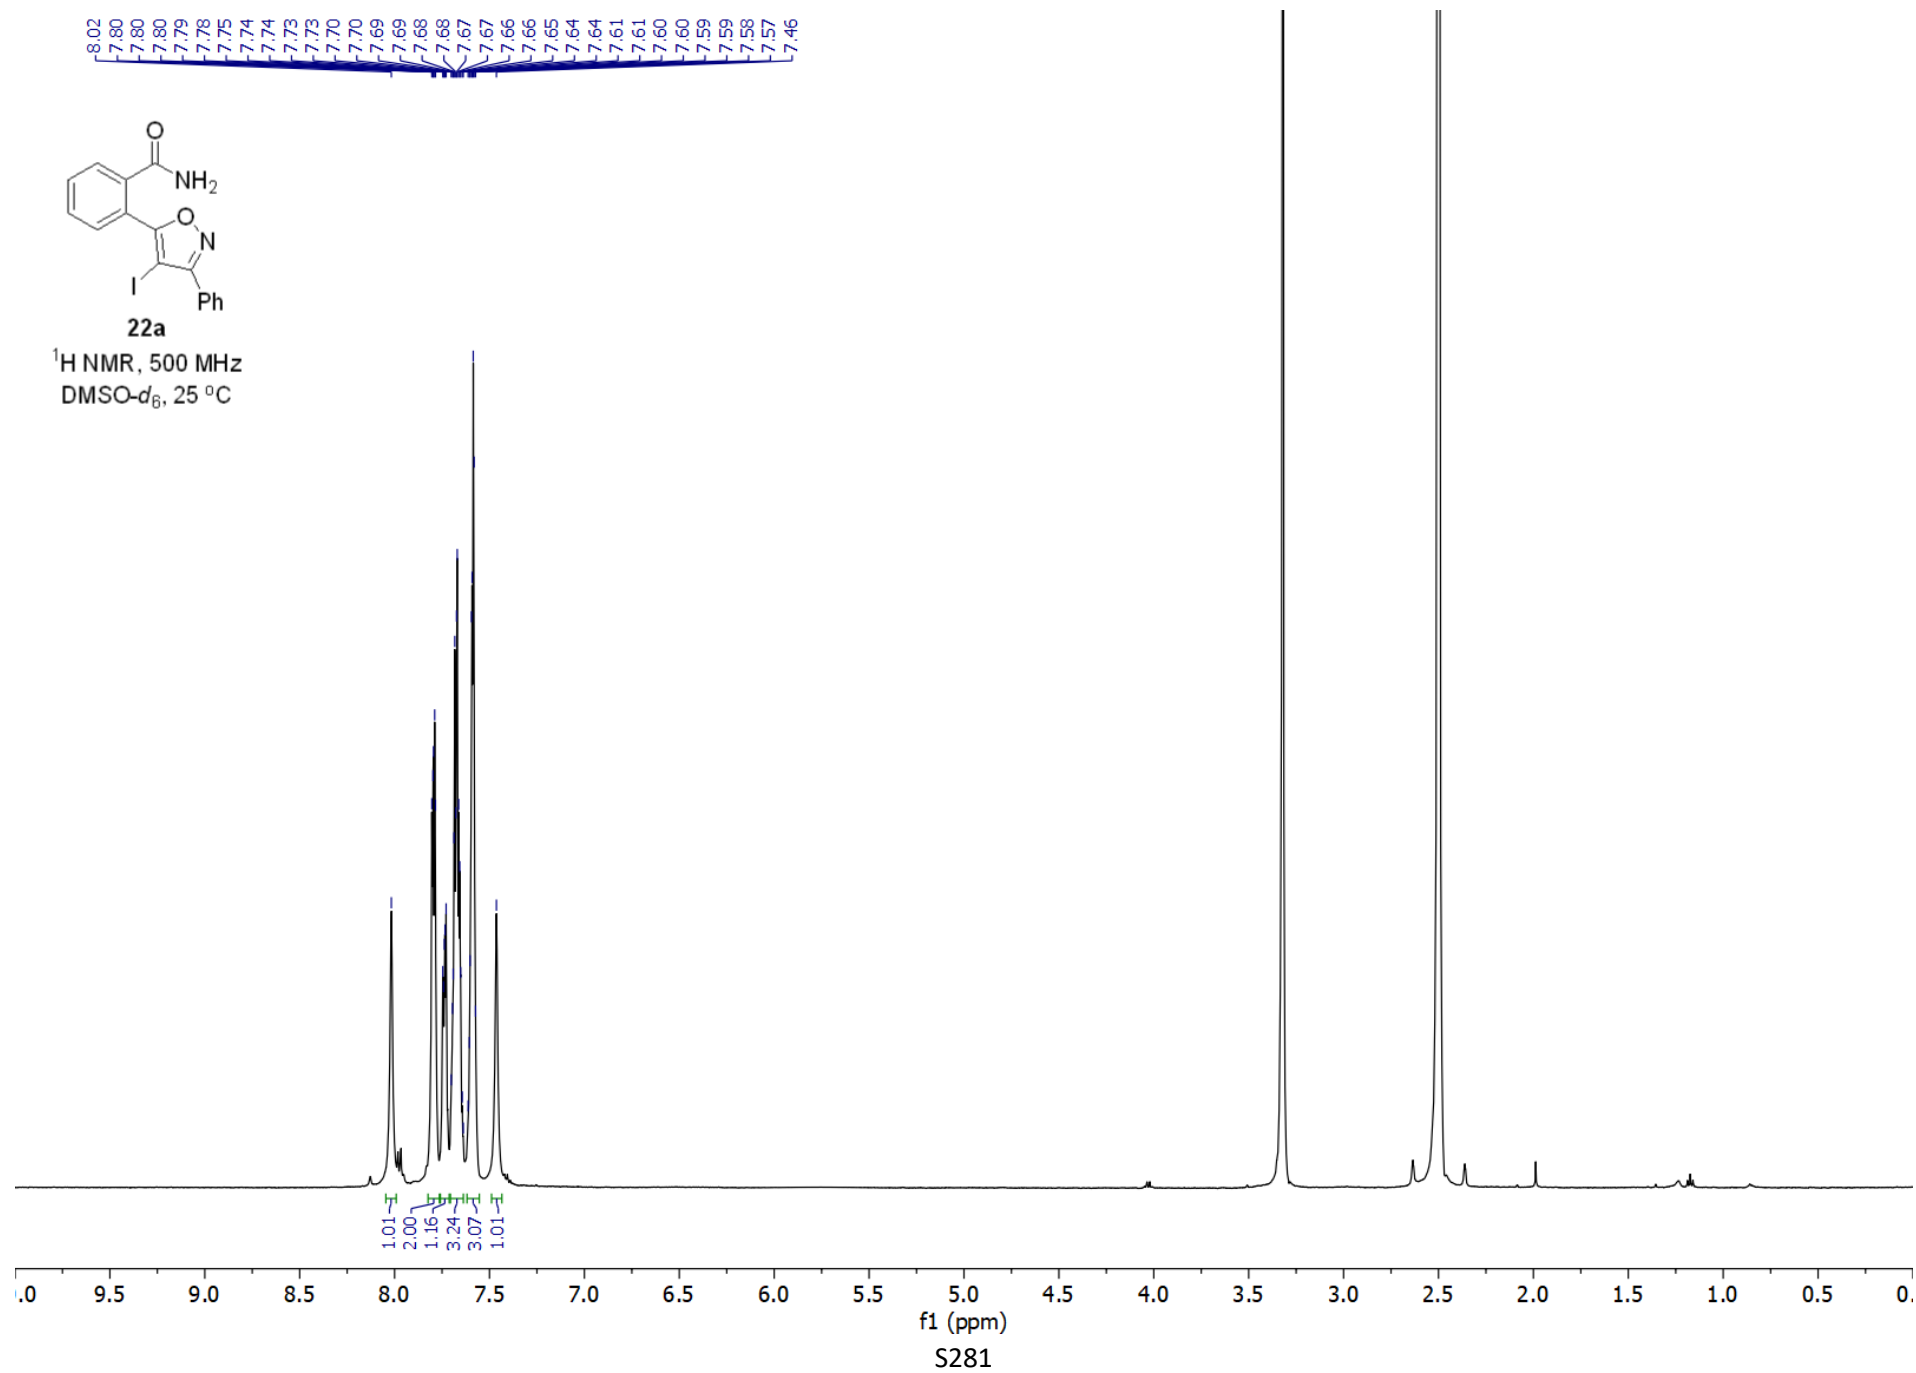

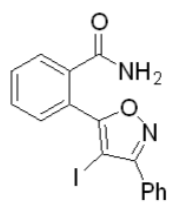

**22a**

$^{13}\text{C}$  NMR, 125 MHz  
DMSO- $d_6$ , 25 °C

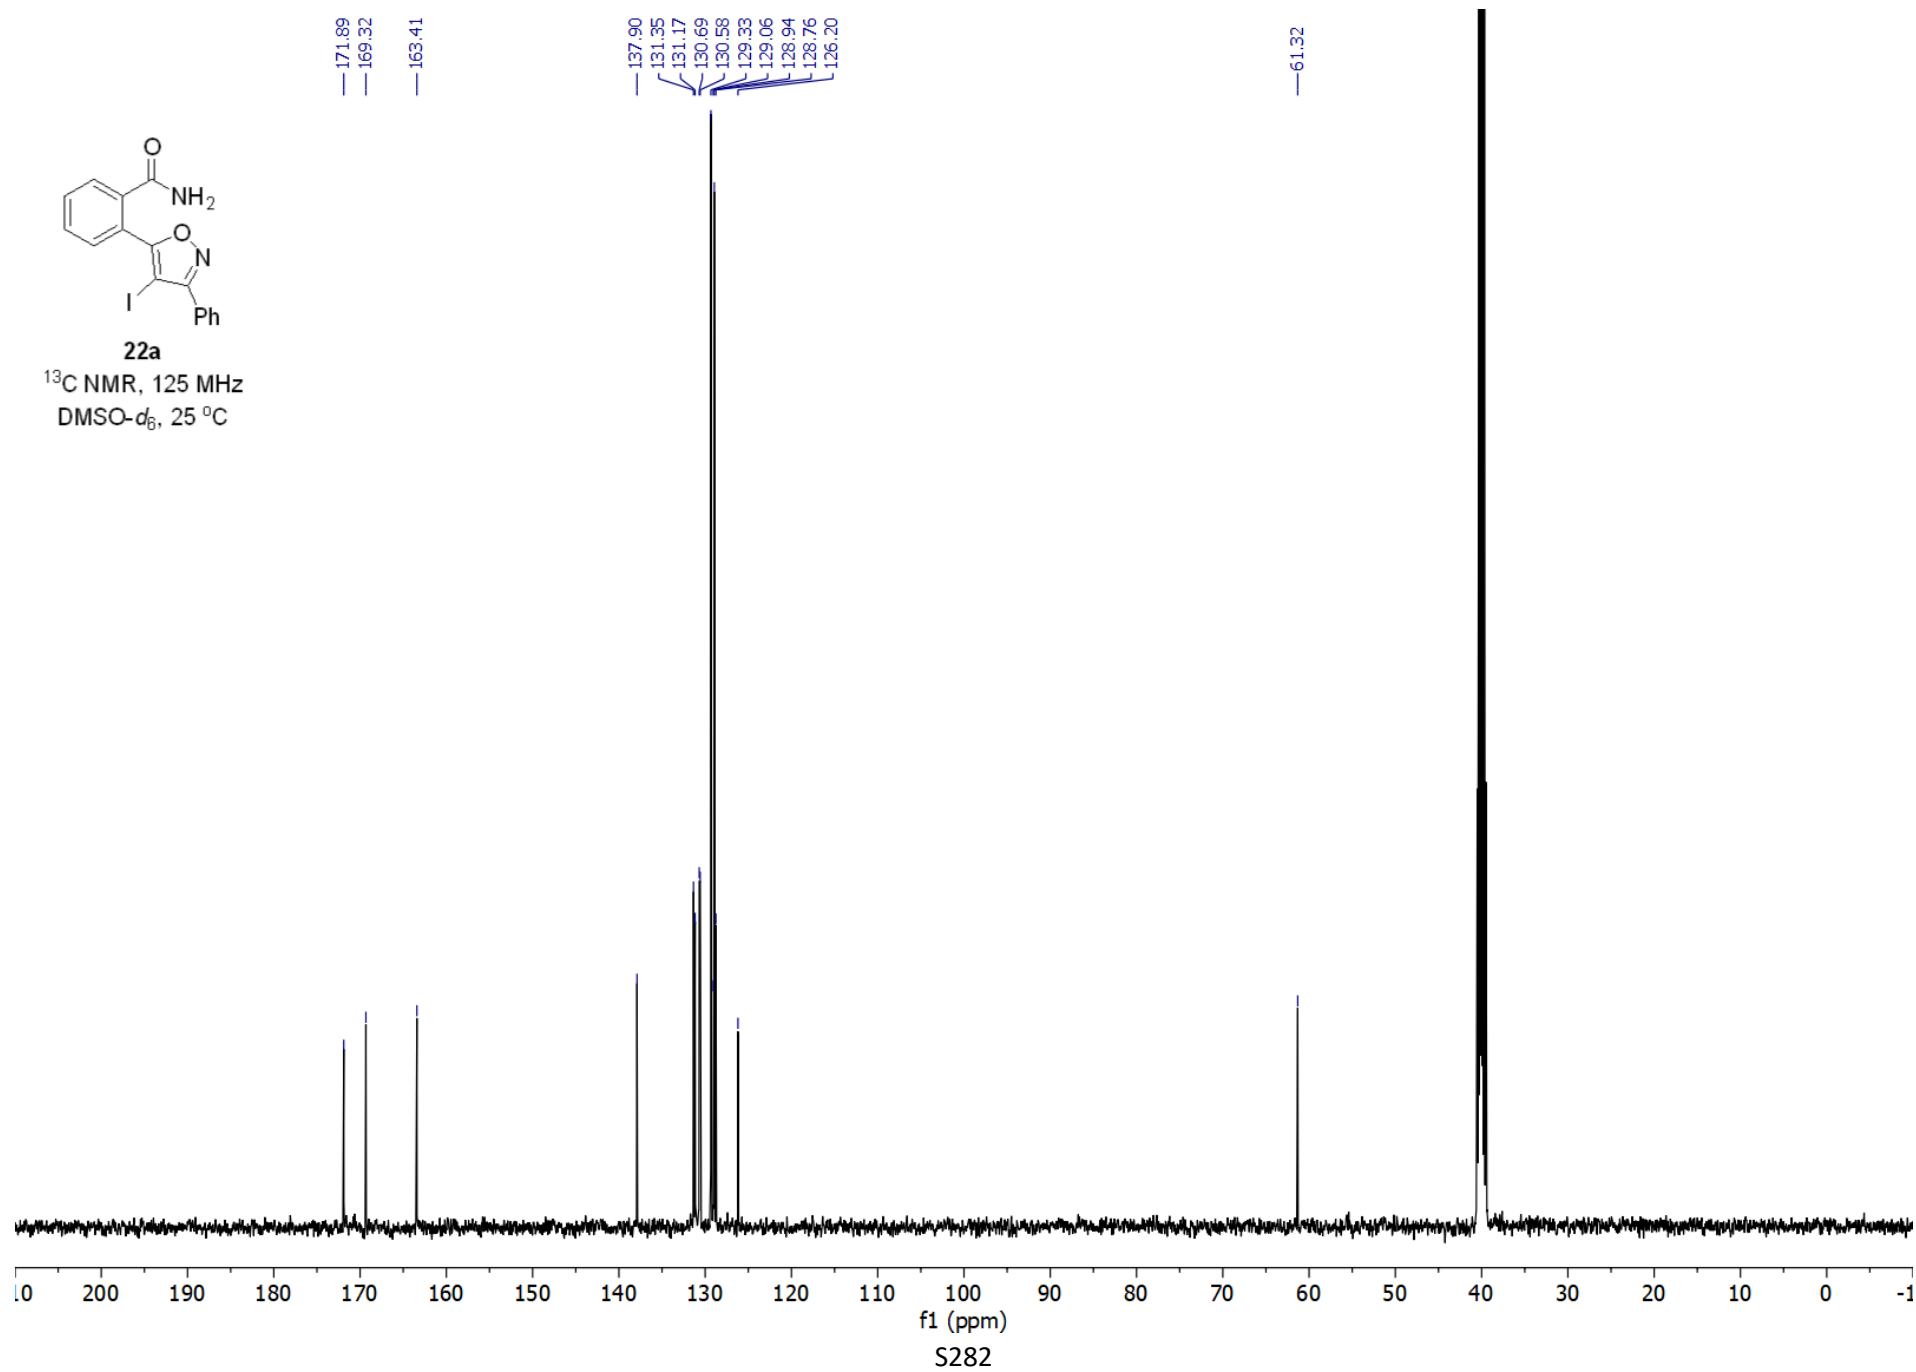

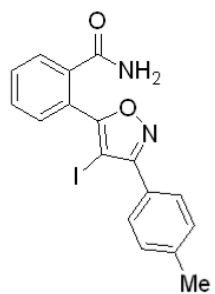

**22b**

$^1\text{H}$  NMR, 500 MHz  
 $\text{CDCl}_3$ , 25  $^\circ\text{C}$

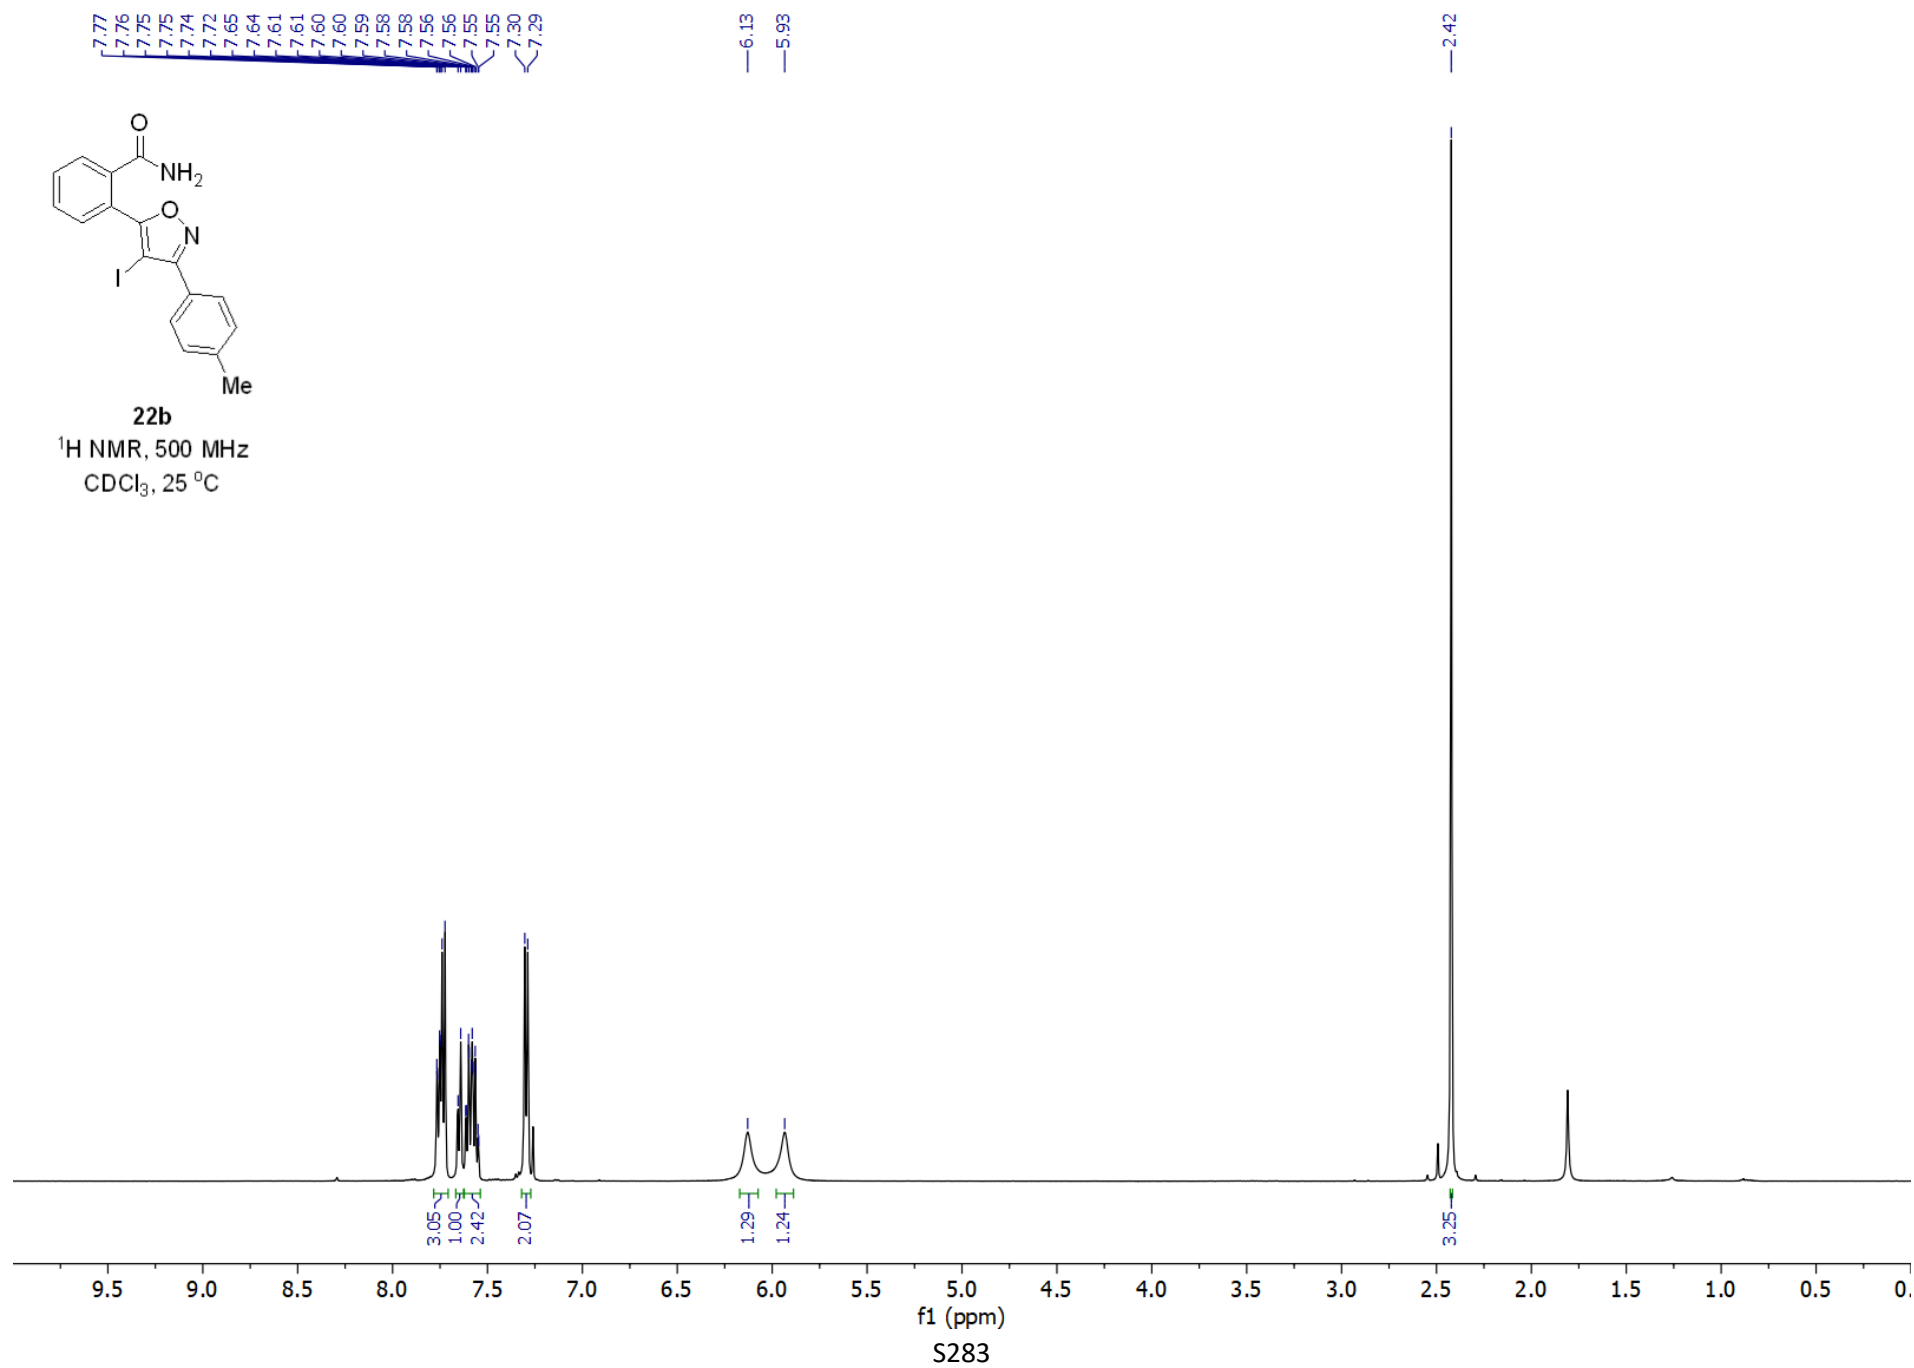

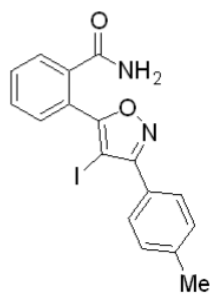

**22b**

$^{13}\text{C}$  NMR, 125 MHz  
 $\text{CDCl}_3$ , 25  $^\circ\text{C}$

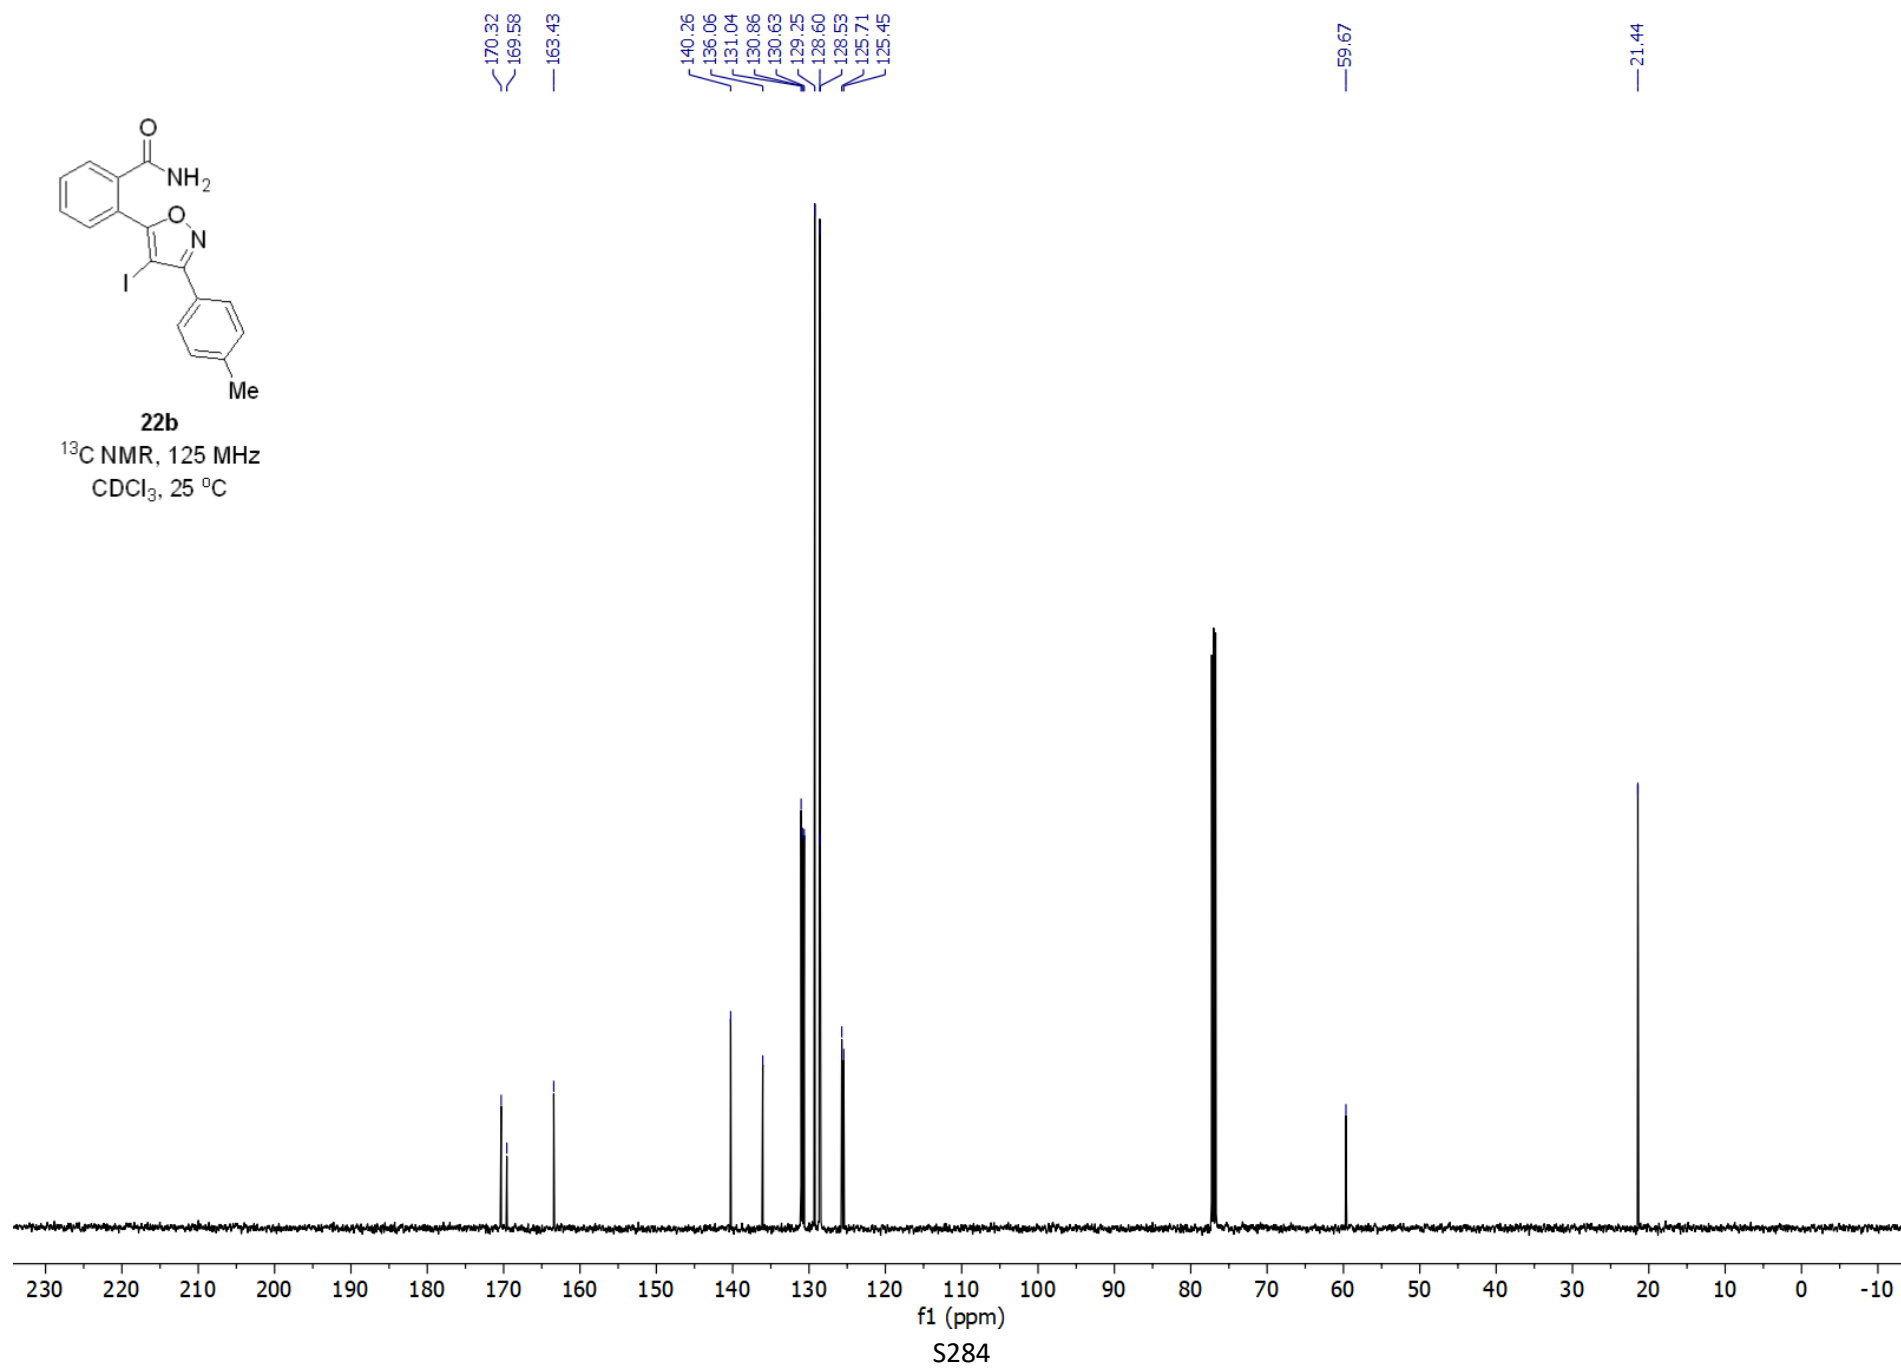

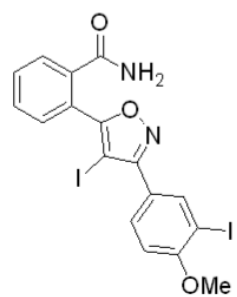

**22c**

<sup>1</sup>H NMR, 500 MHz  
DMSO-*d*<sub>6</sub>, 25 °C

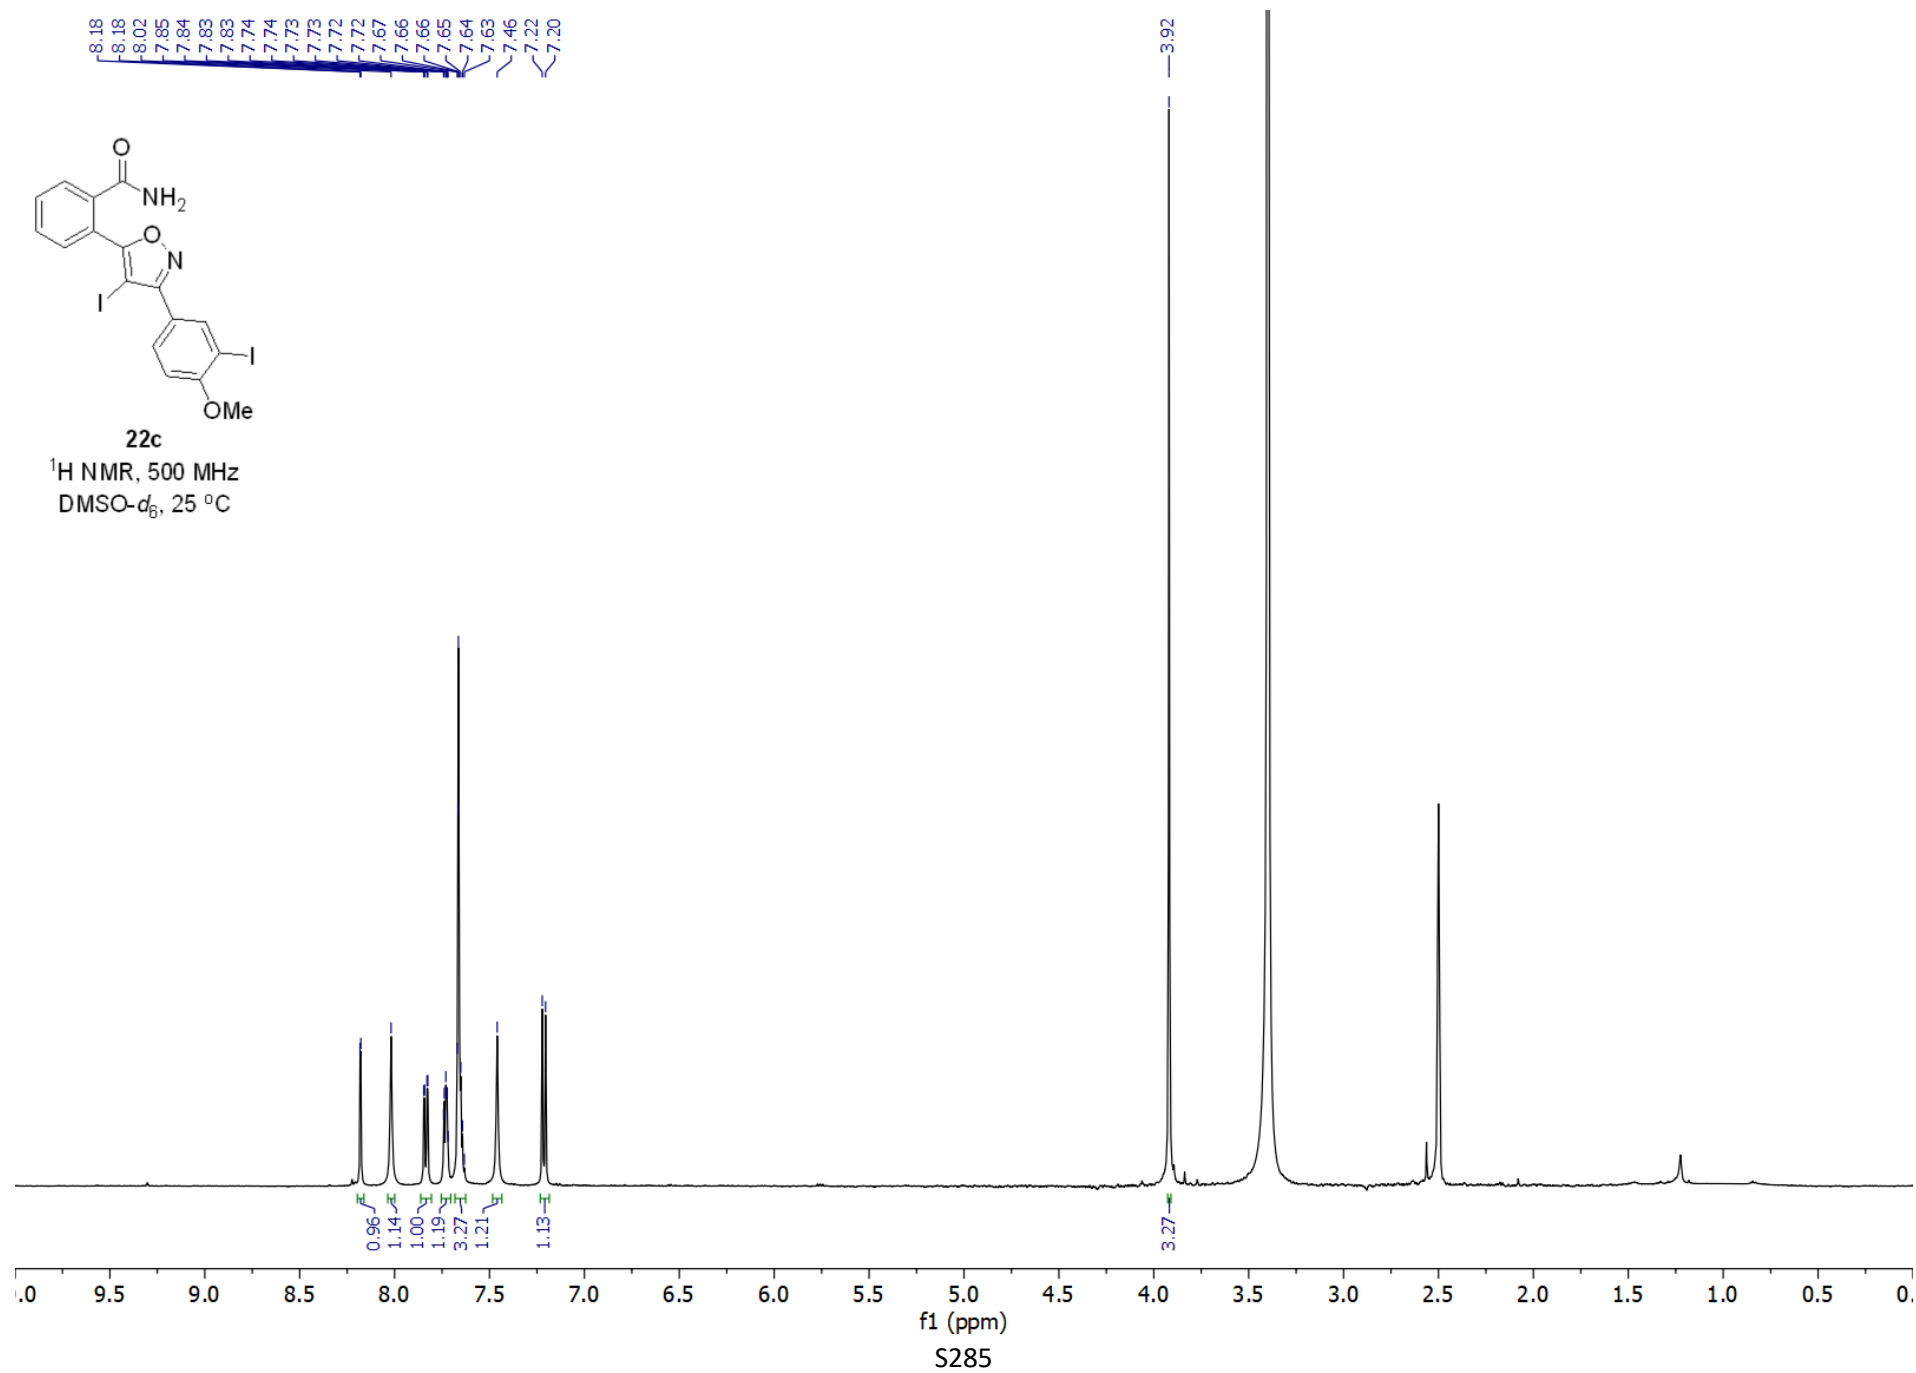

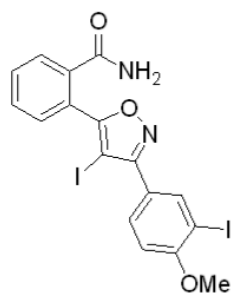

**22c**

$^{13}\text{C}$  NMR, 125 MHz  
DMSO- $d_6$ , 25 °C

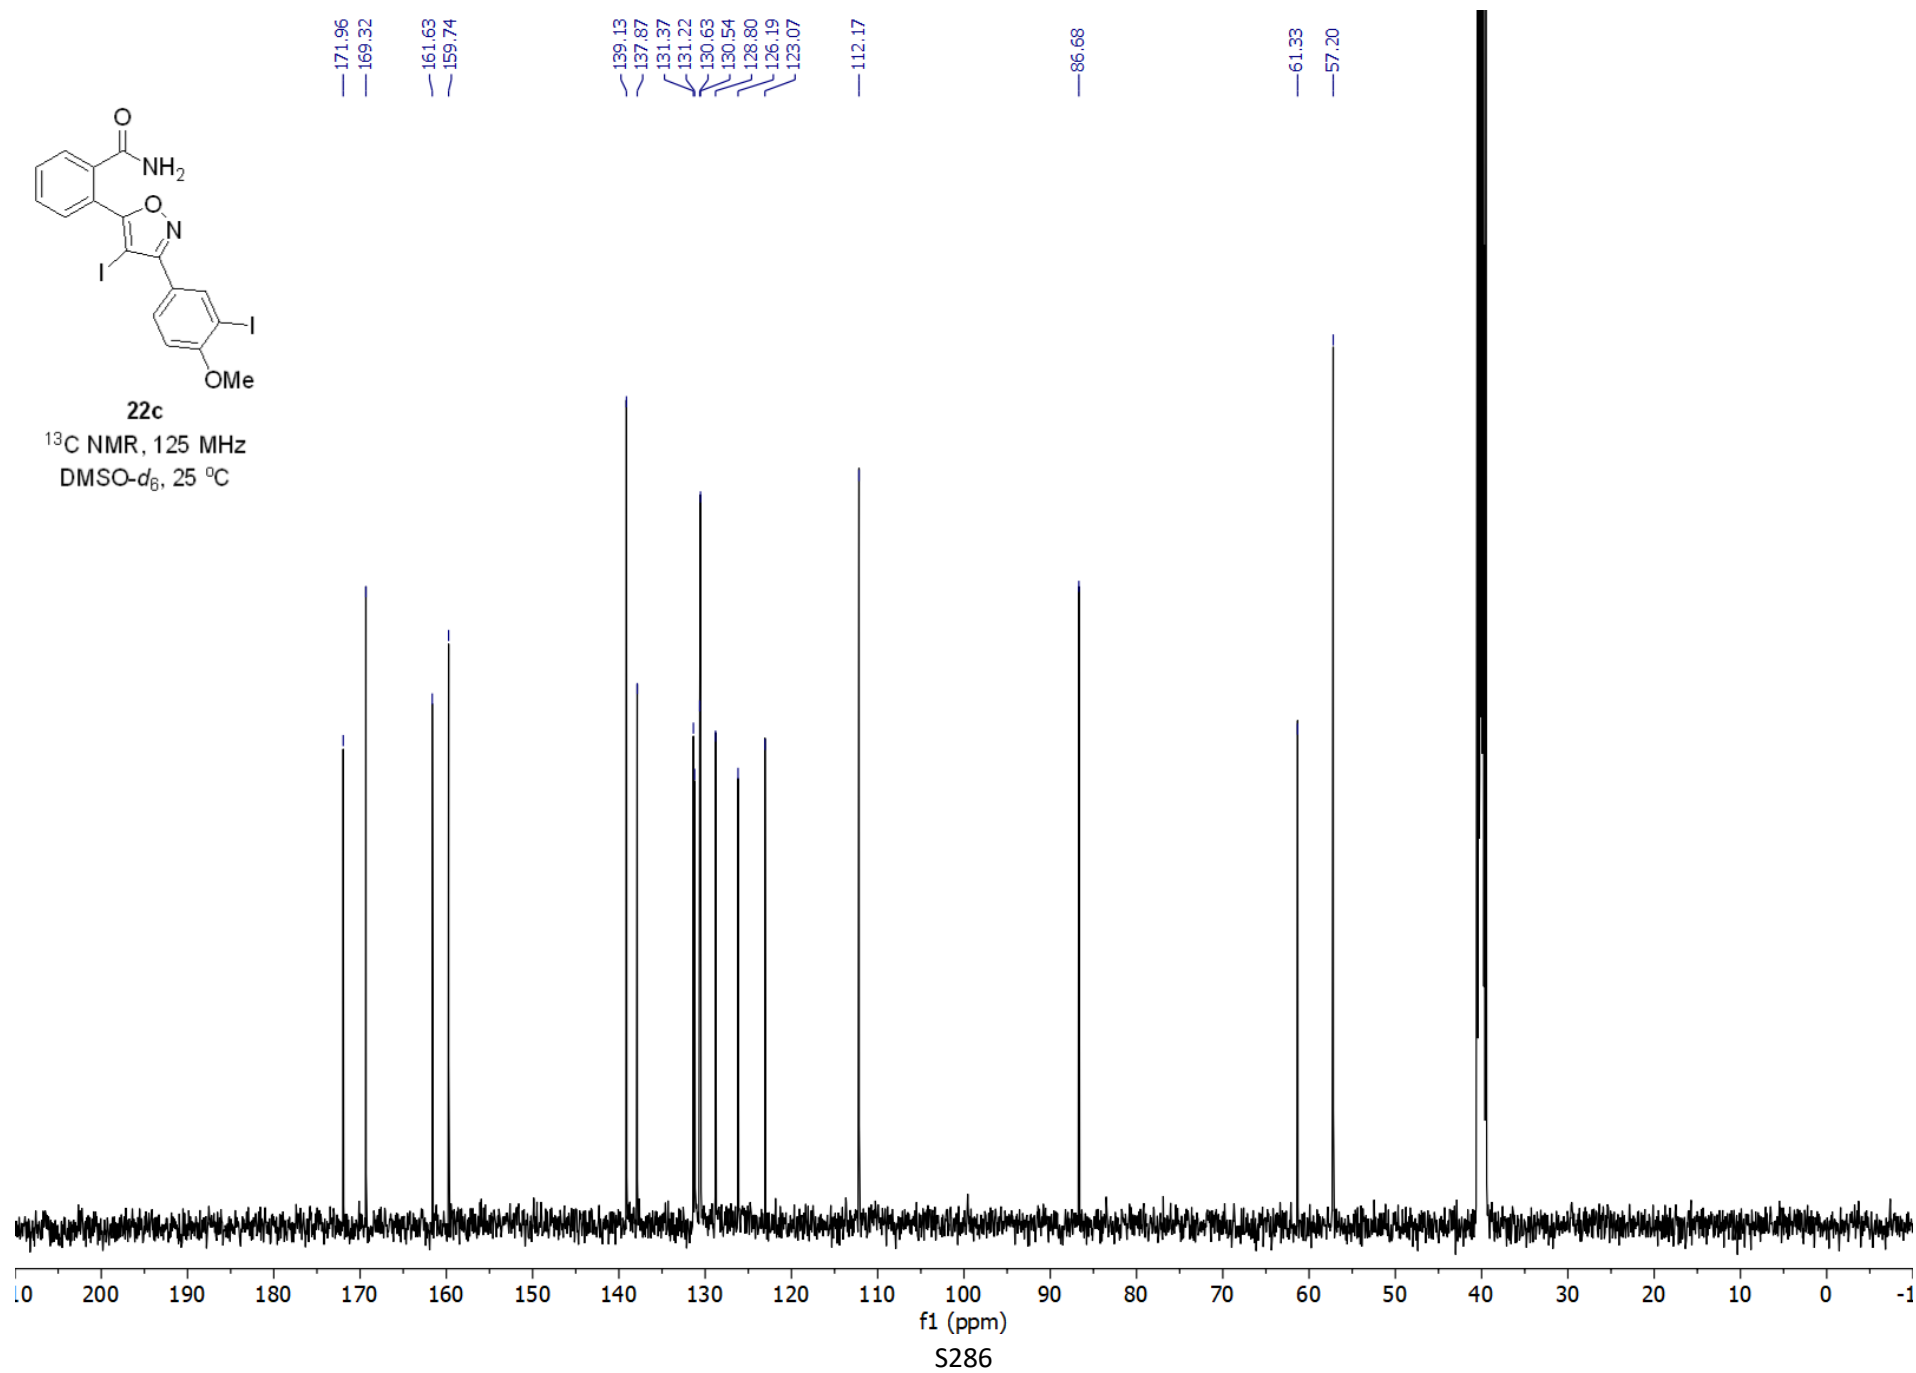

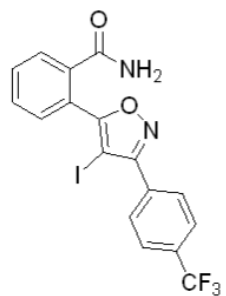

**22d**

<sup>1</sup>H NMR, 500 MHz  
DMSO-*d*<sub>6</sub>, 25 °C

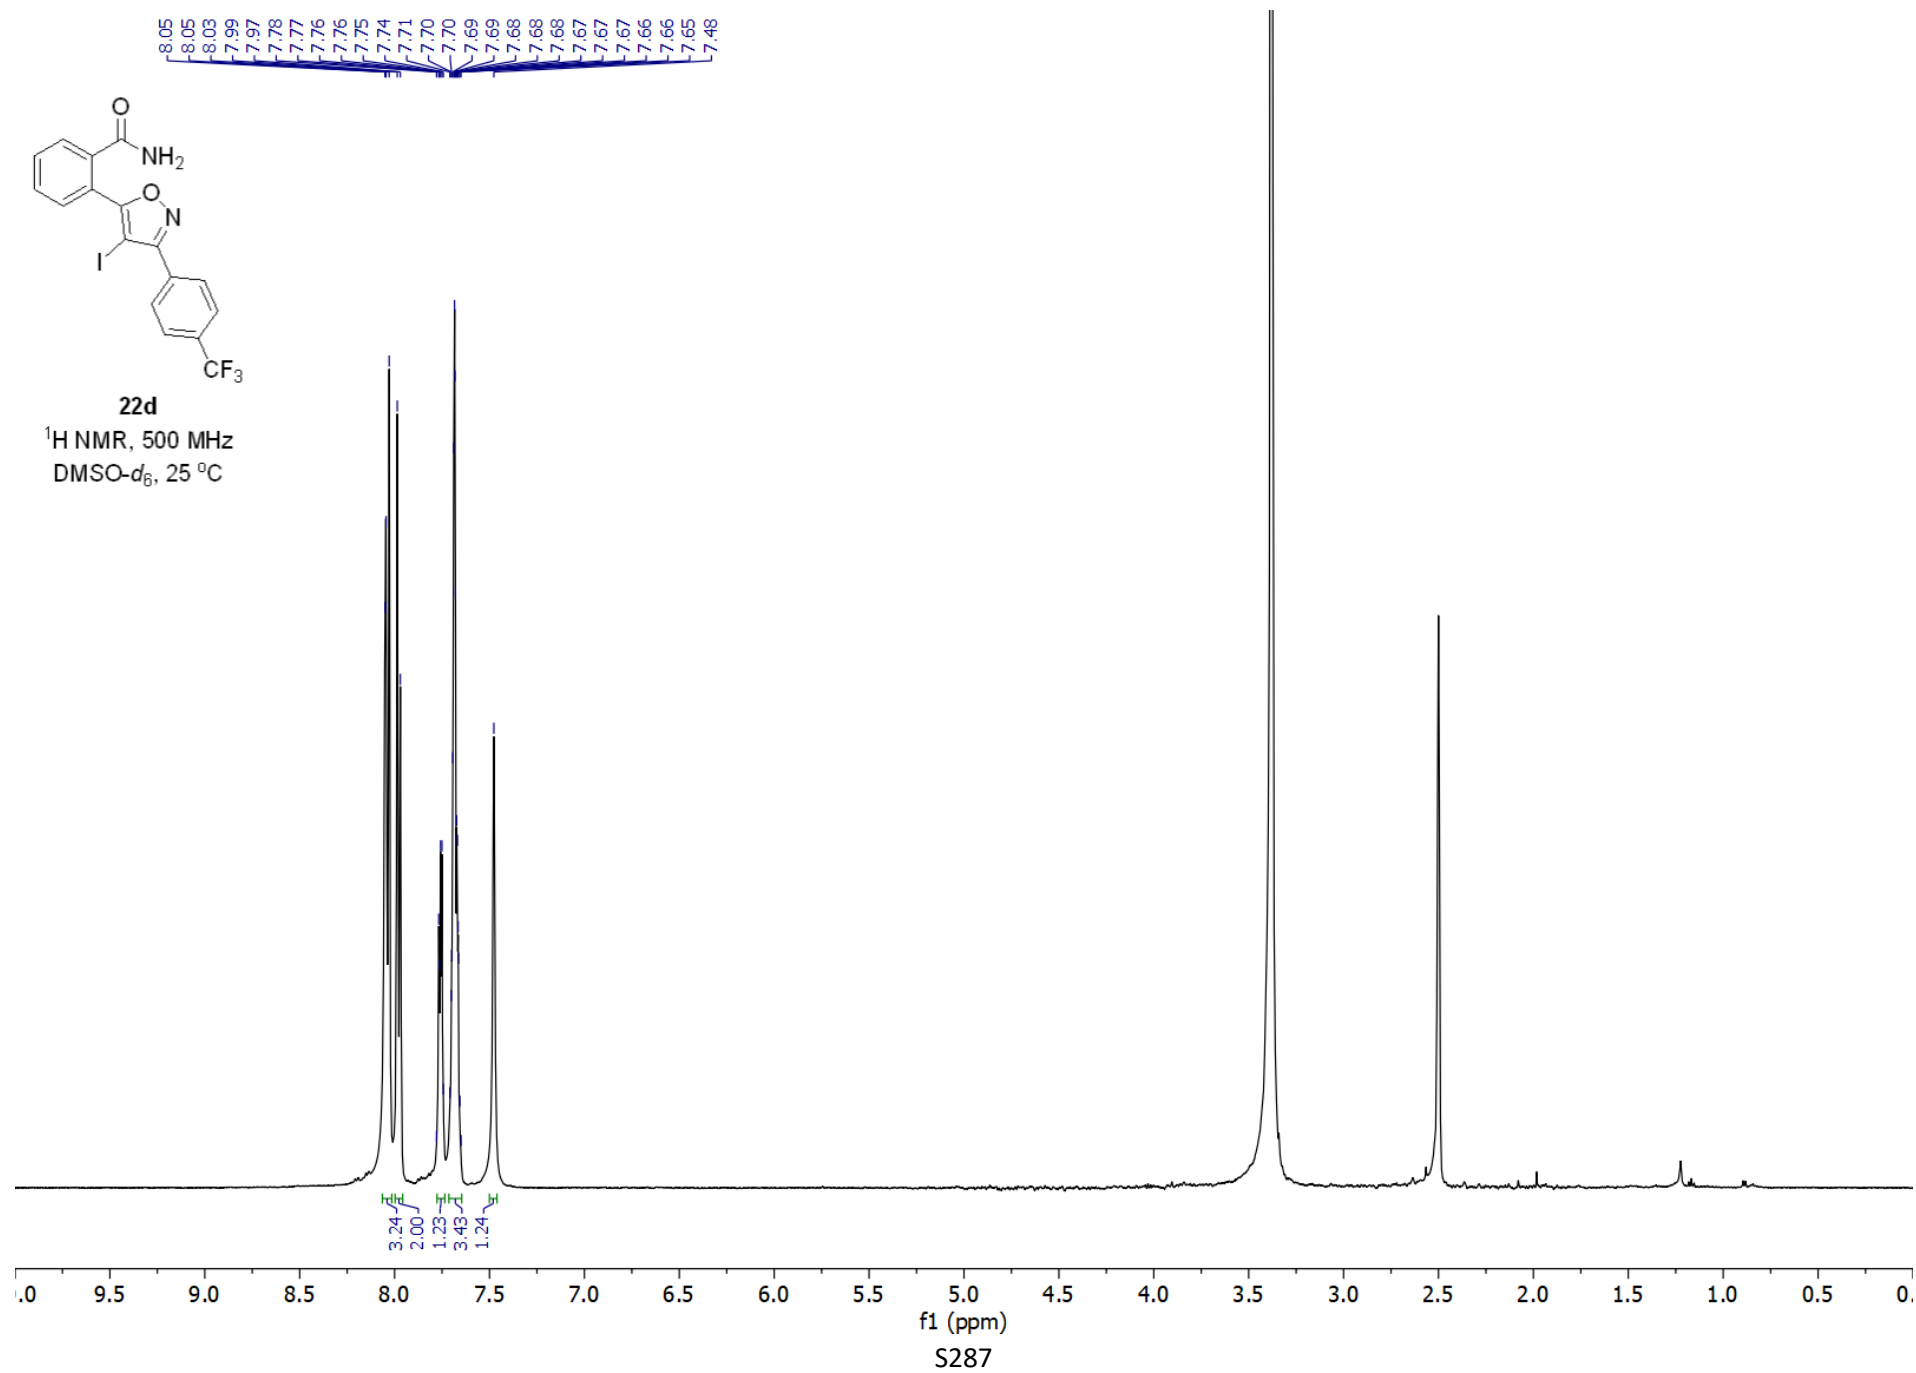

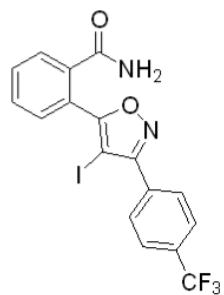

**22d**

$^{13}\text{C}$  NMR, 125 MHz  
DMSO- $d_6$ , 25 °C

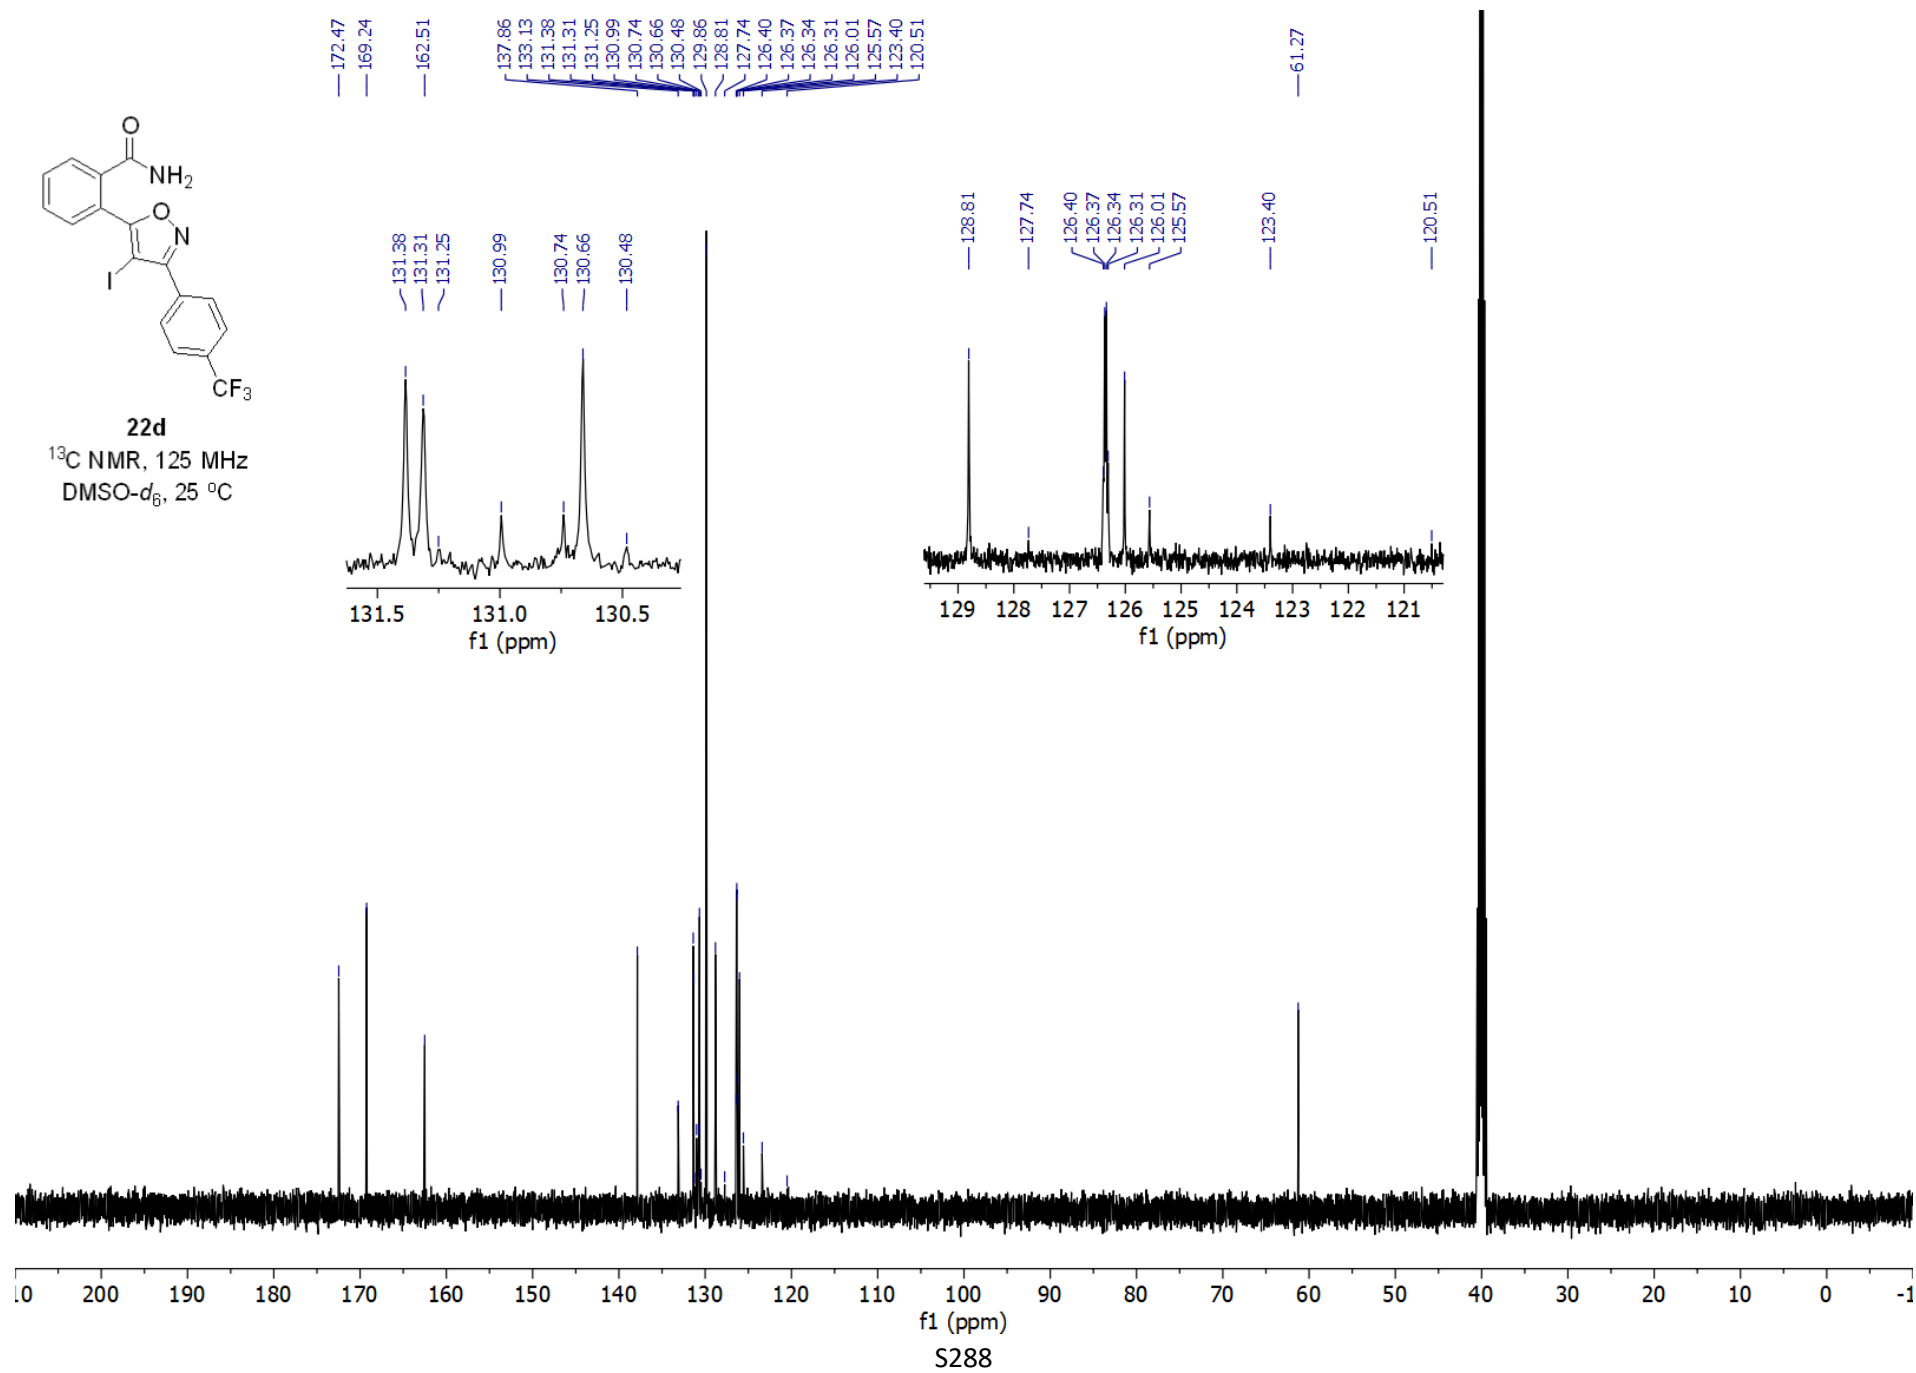

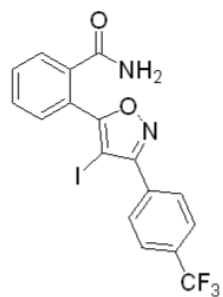

**22d**

$^{19}\text{F}$  NMR, 470 MHz  
DMSO- $d_6$ , 25 °C

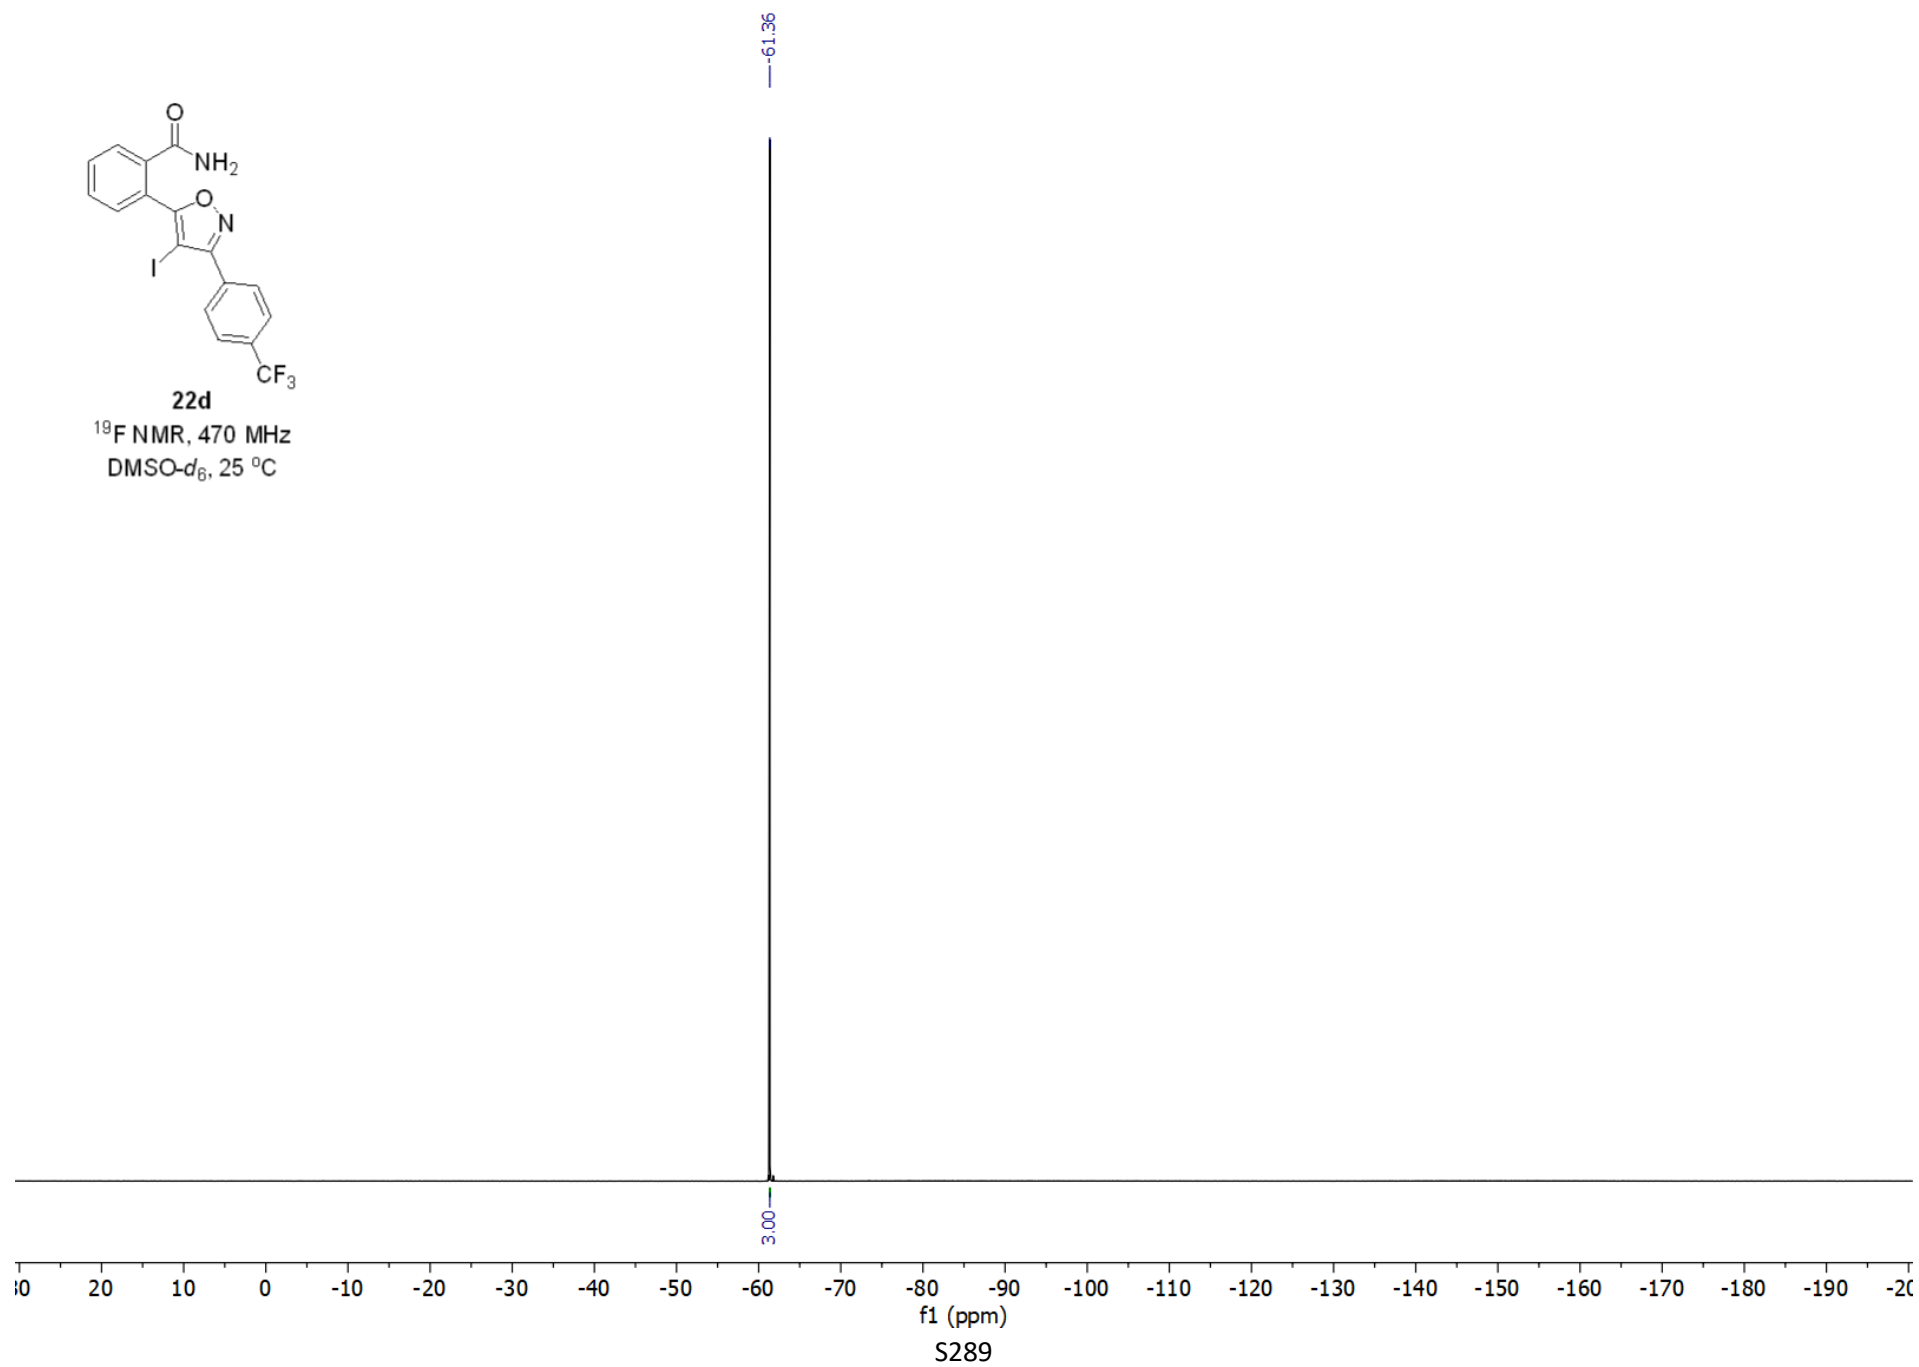

8.03  
7.88  
7.87  
7.87  
7.86  
7.85  
7.85  
7.84  
7.84  
7.76  
7.76  
7.75  
7.75  
7.75  
7.74  
7.74  
7.73  
7.73  
7.72  
7.72  
7.70  
7.69  
7.69  
7.68  
7.68  
7.67  
7.67  
7.67  
7.66  
7.66  
7.65  
7.65  
7.64  
7.64  
7.46  
7.46  
7.45  
7.44  
7.44  
7.43  
7.43  
7.42  
7.42

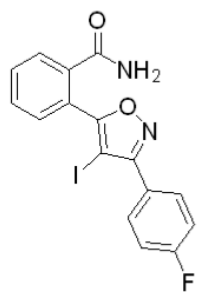

**22e**

<sup>1</sup>H NMR, 500 MHz  
DMSO-d<sub>6</sub>, 25 °C

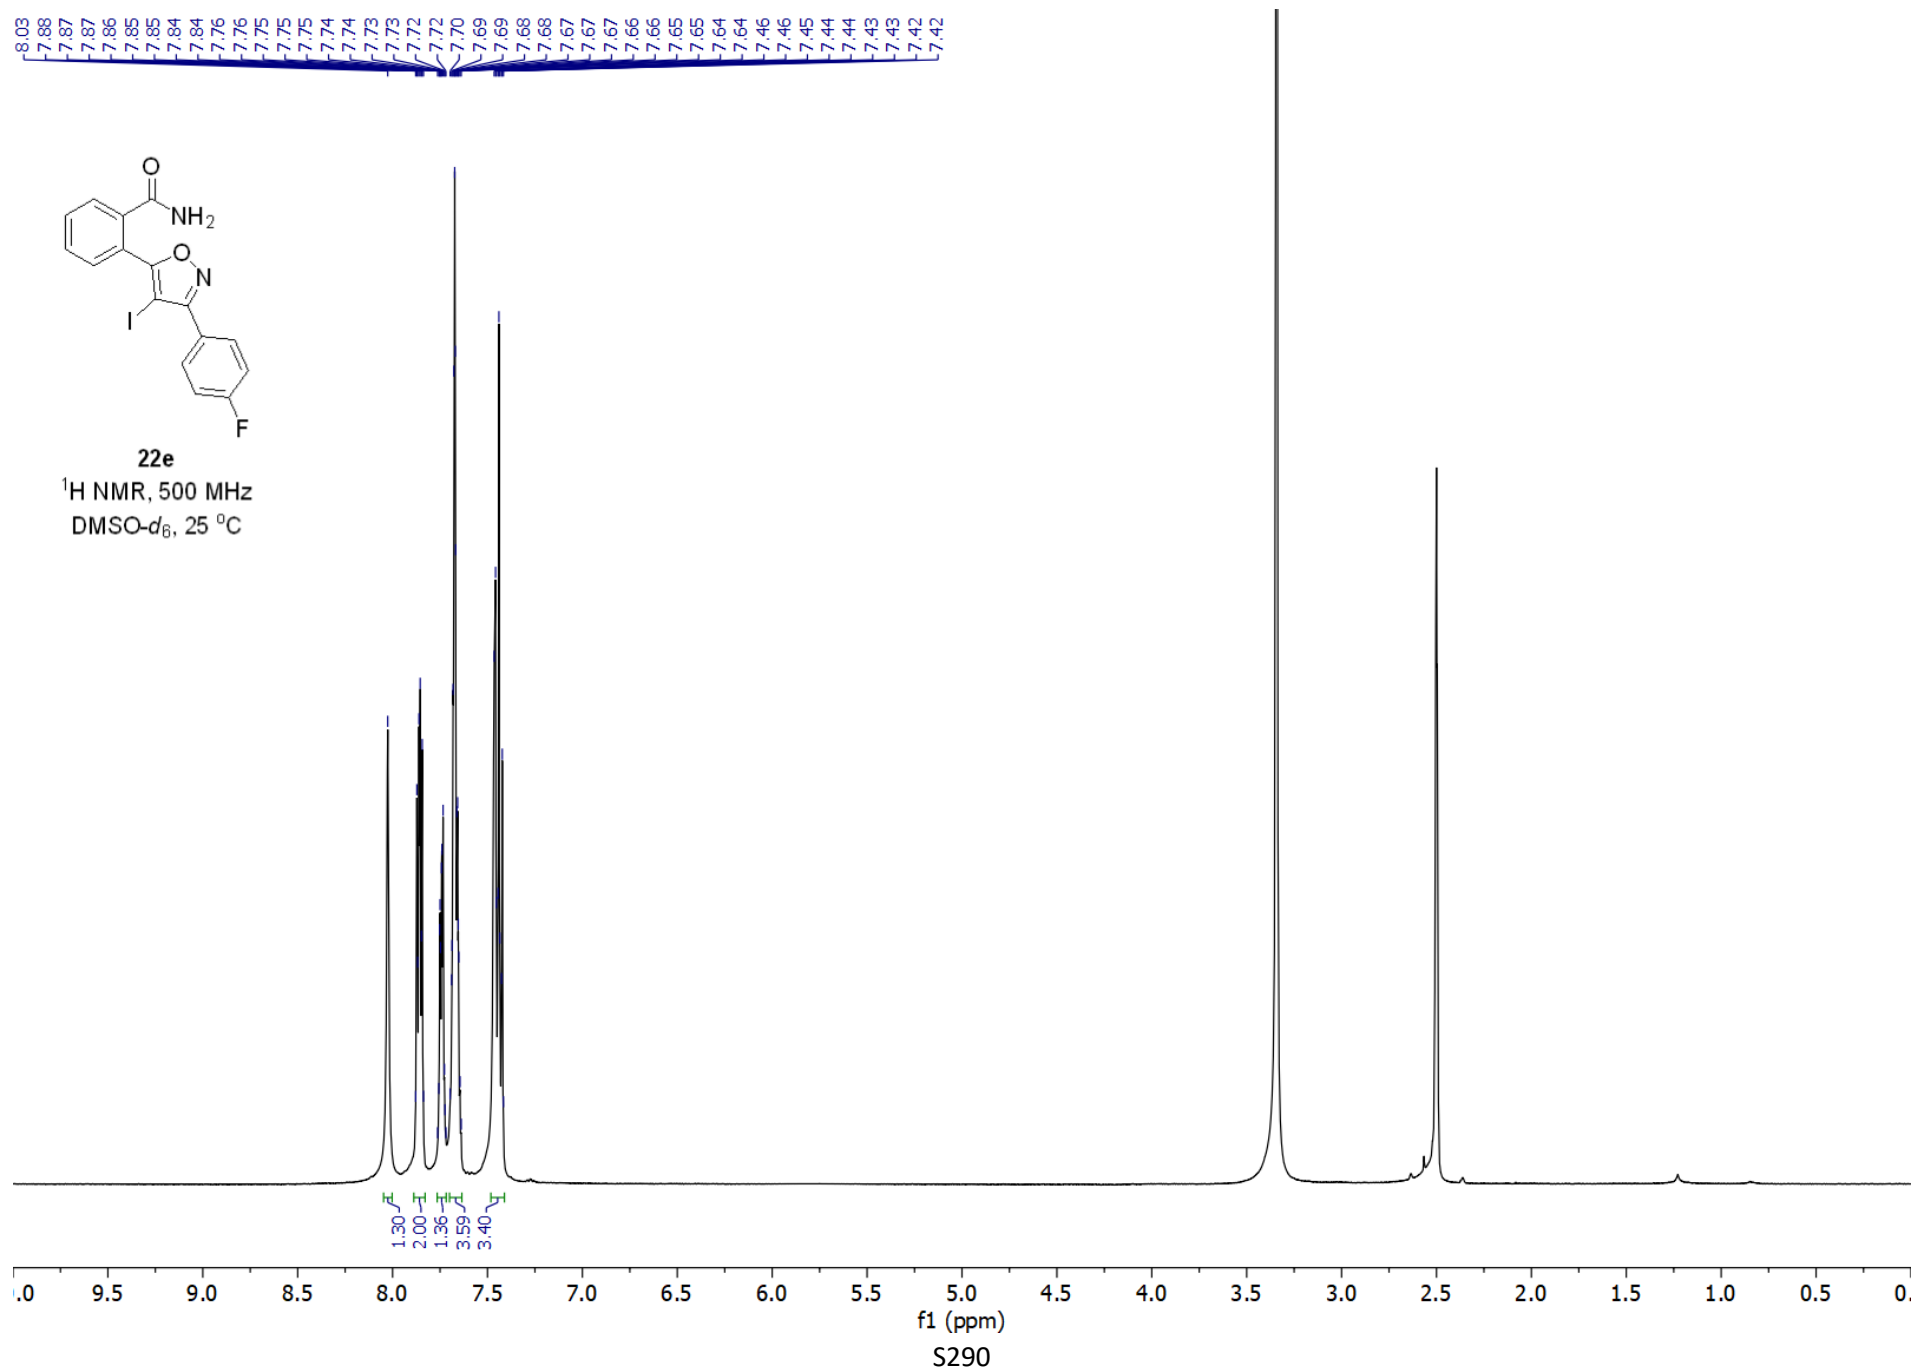

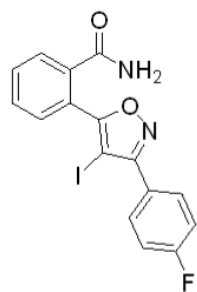

**22e**

$^{13}\text{C}$  NMR, 125 MHz  
DMSO- $d_6$ , 25 °C

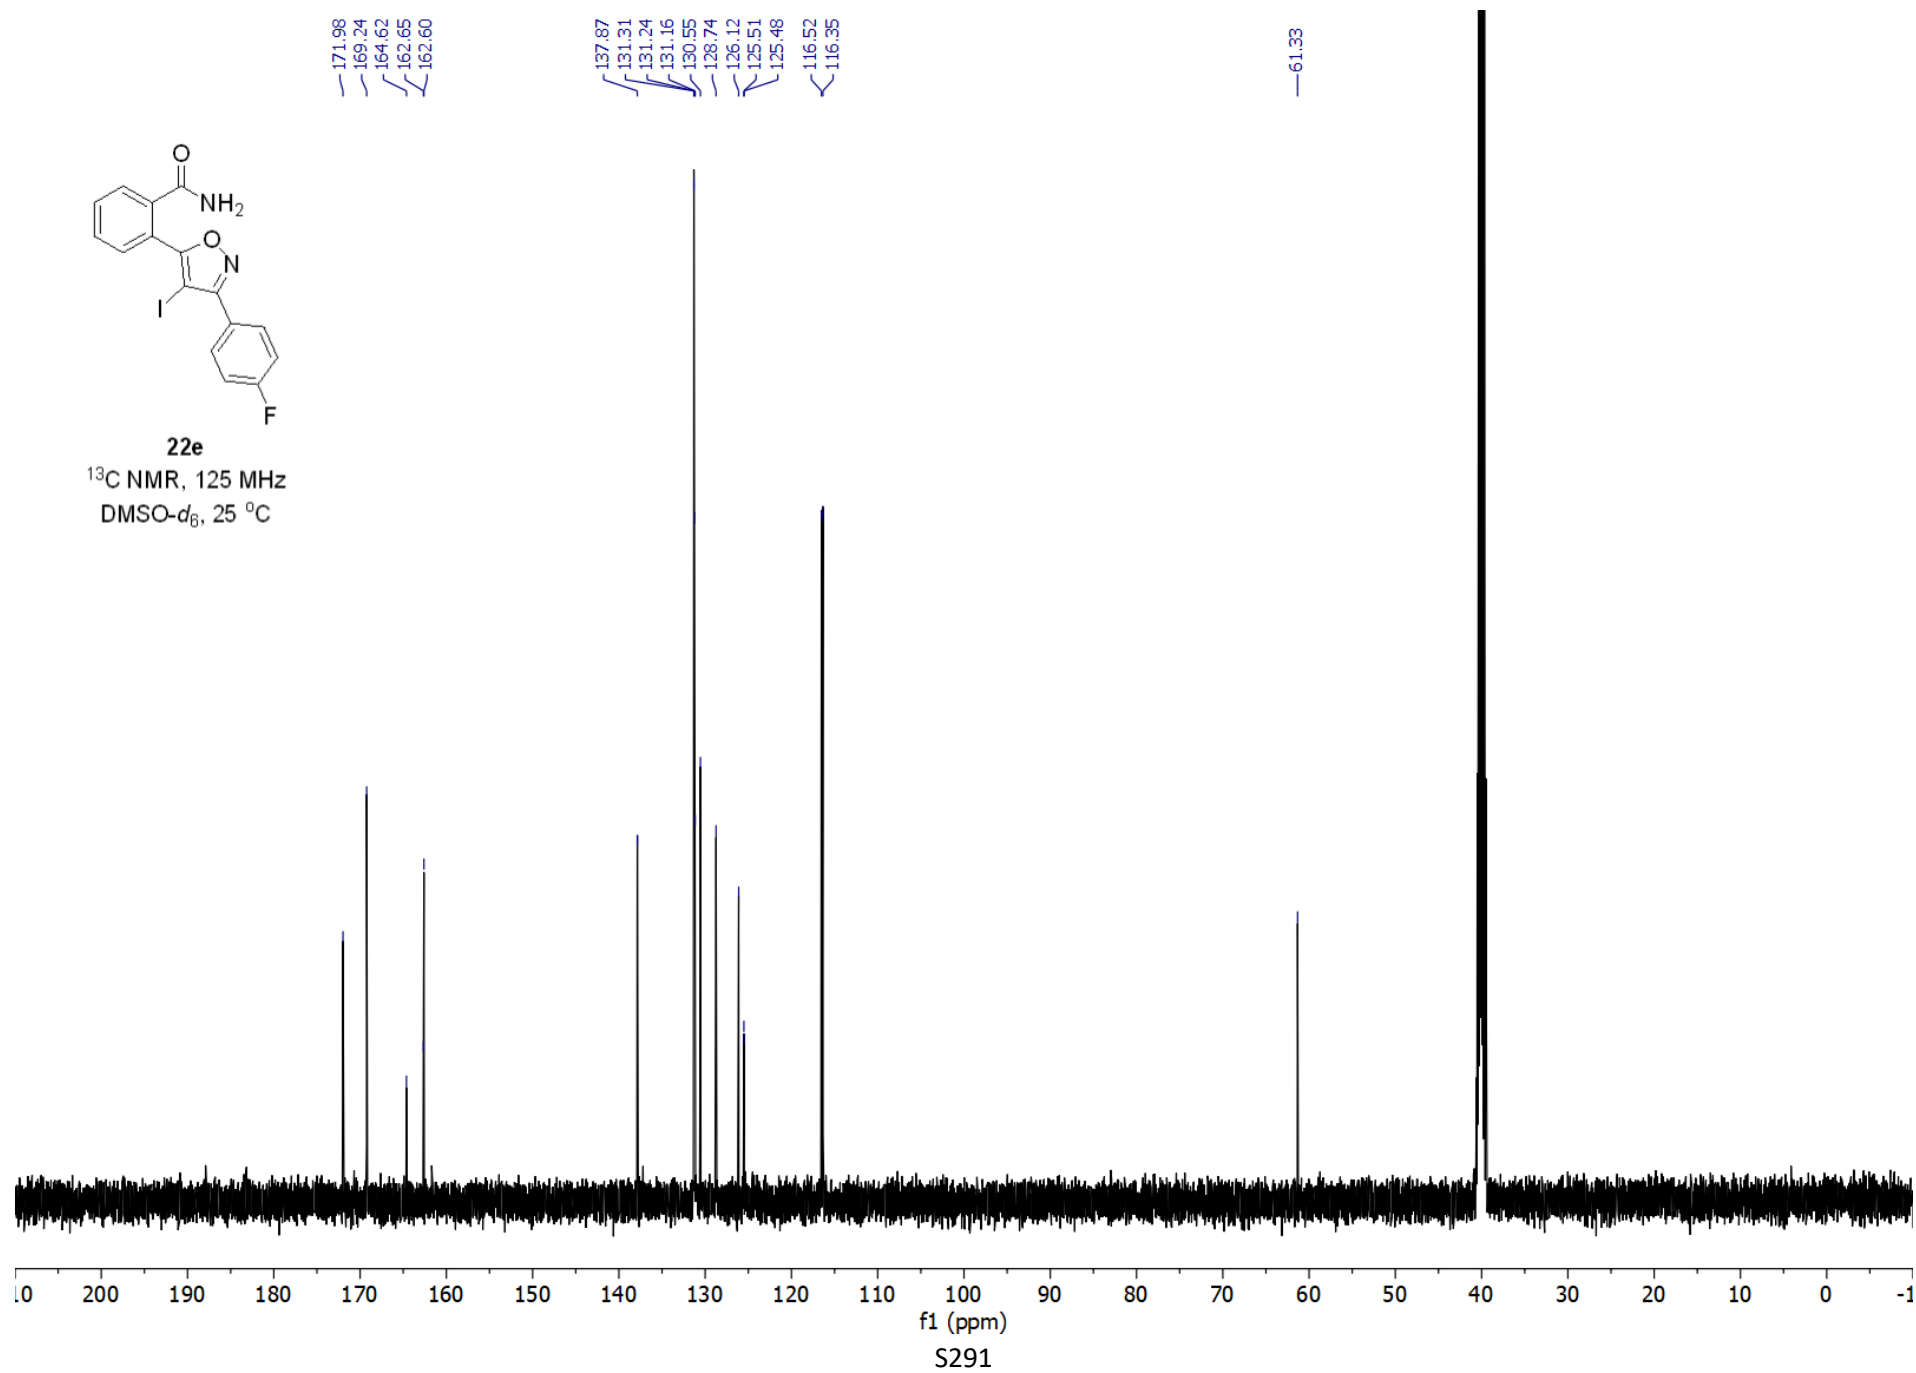

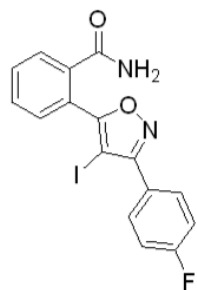

**22e**

$^{19}\text{F}$  NMR, 470 MHz  
DMSO- $d_6$ , 25 °C

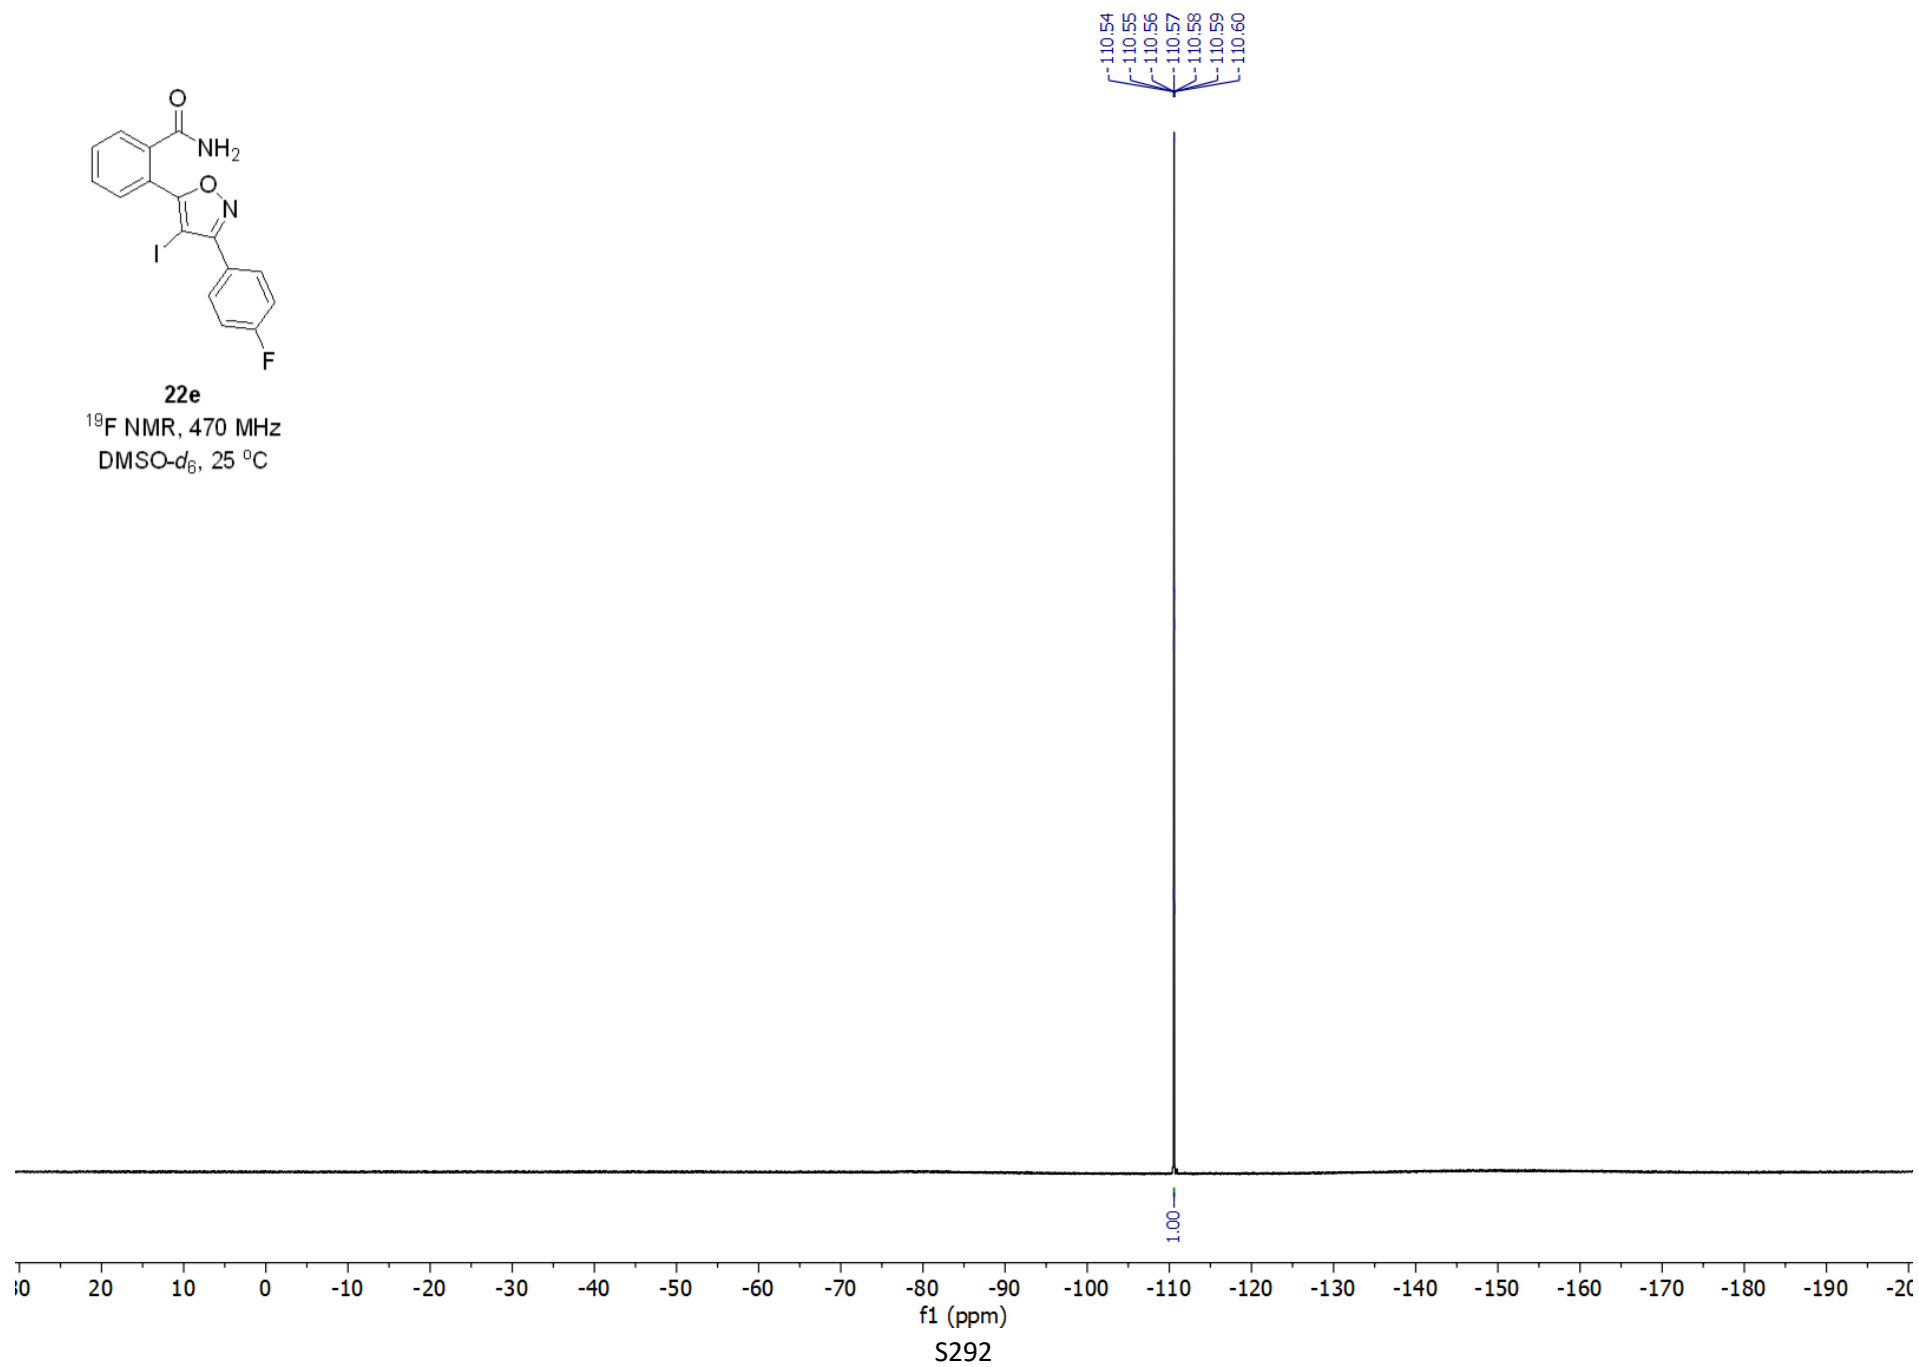

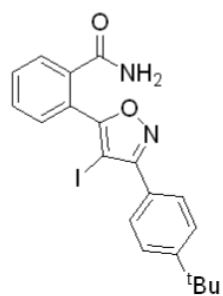

**22f**

$^1\text{H}$  NMR, 500 MHz  
DMSO- $d_6$ , 25 °C

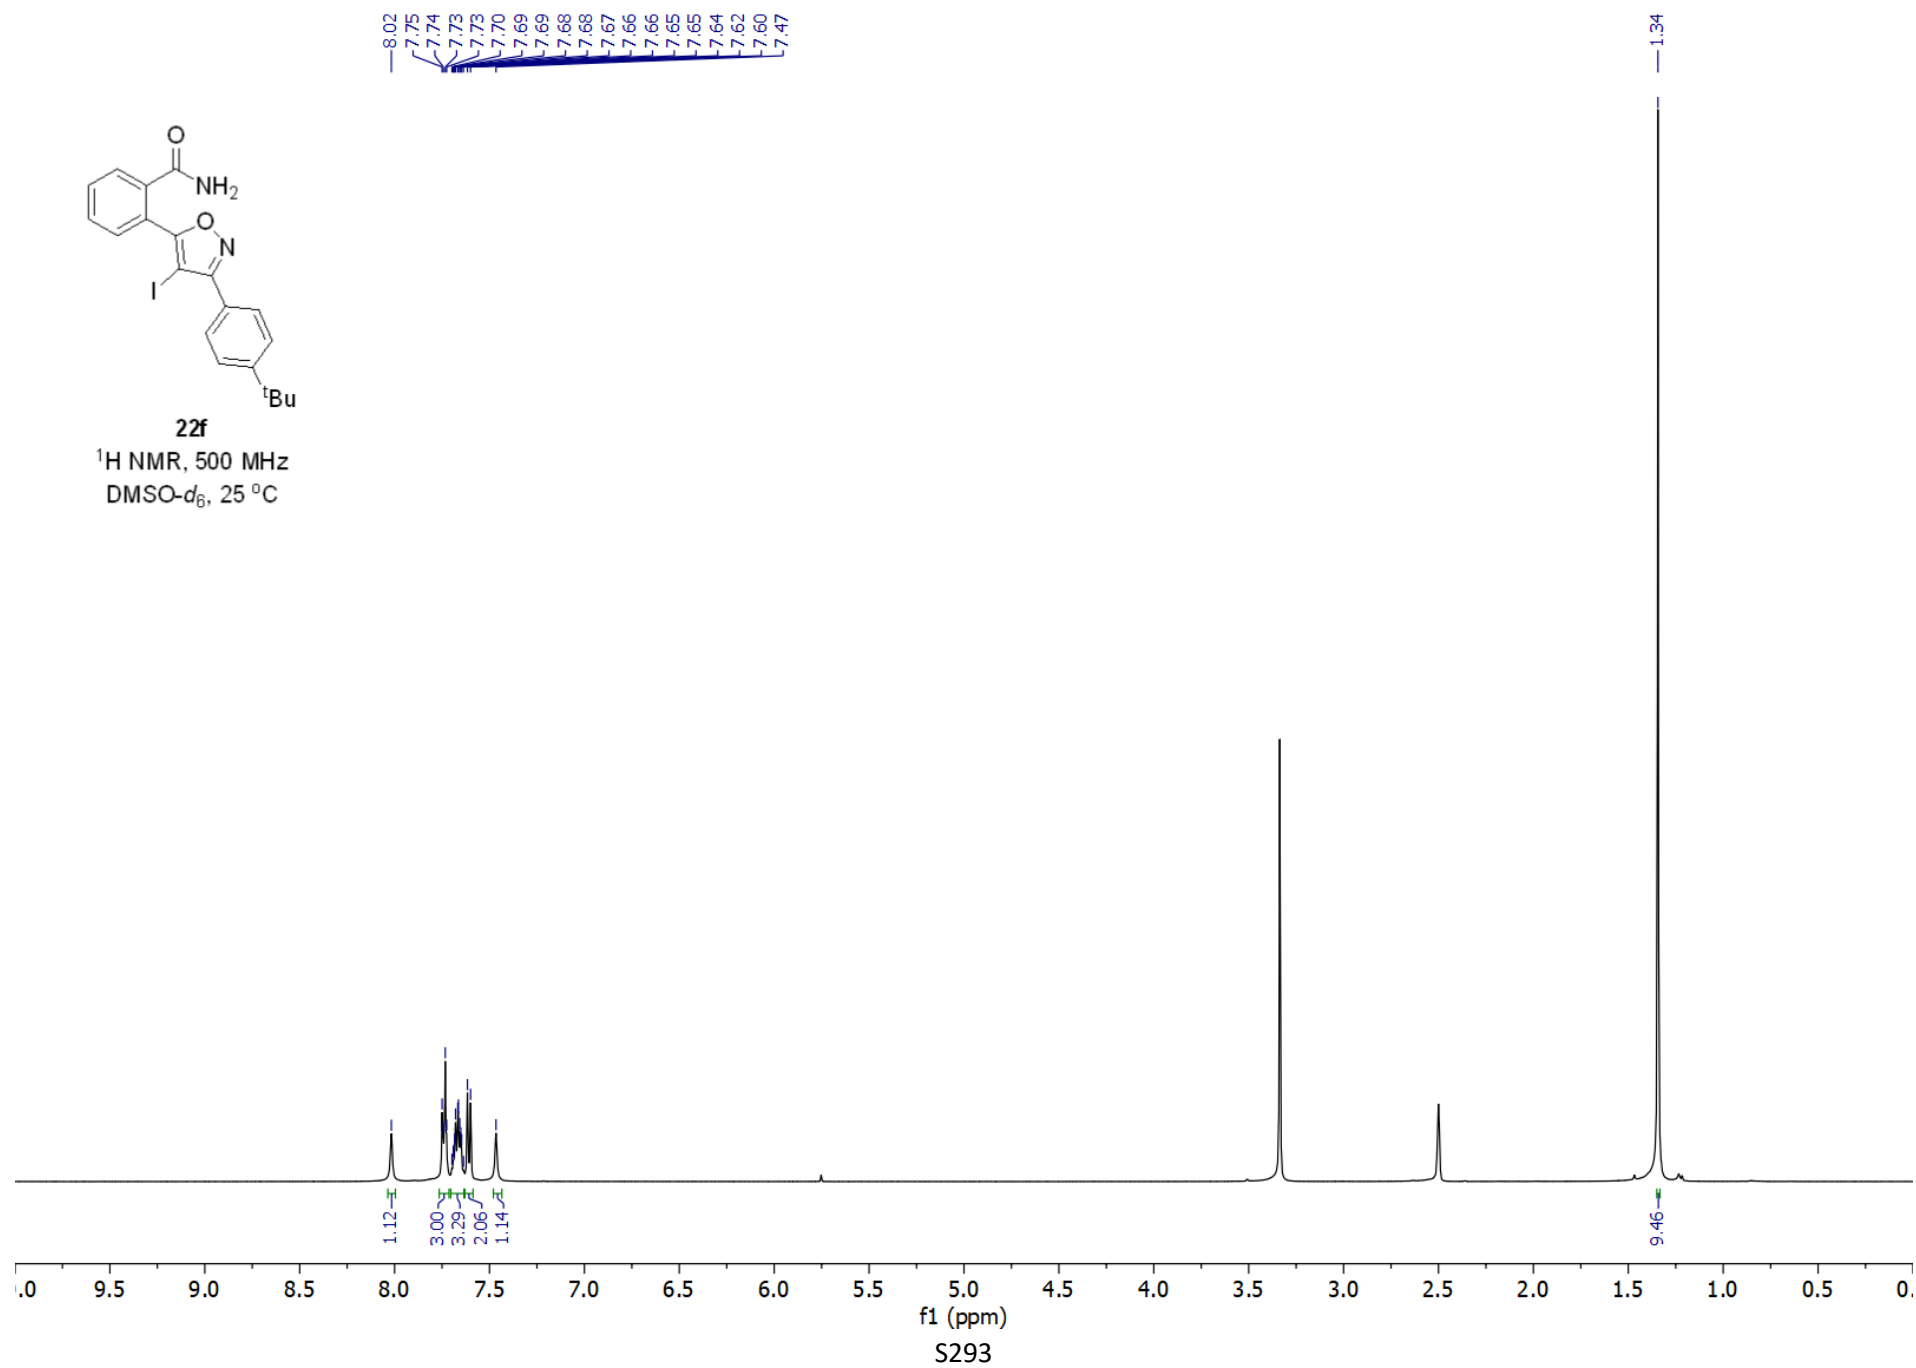

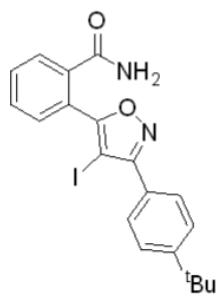

**22f**

$^{13}\text{C}$  NMR, 125 MHz  
DMSO- $d_6$ , 25 °C

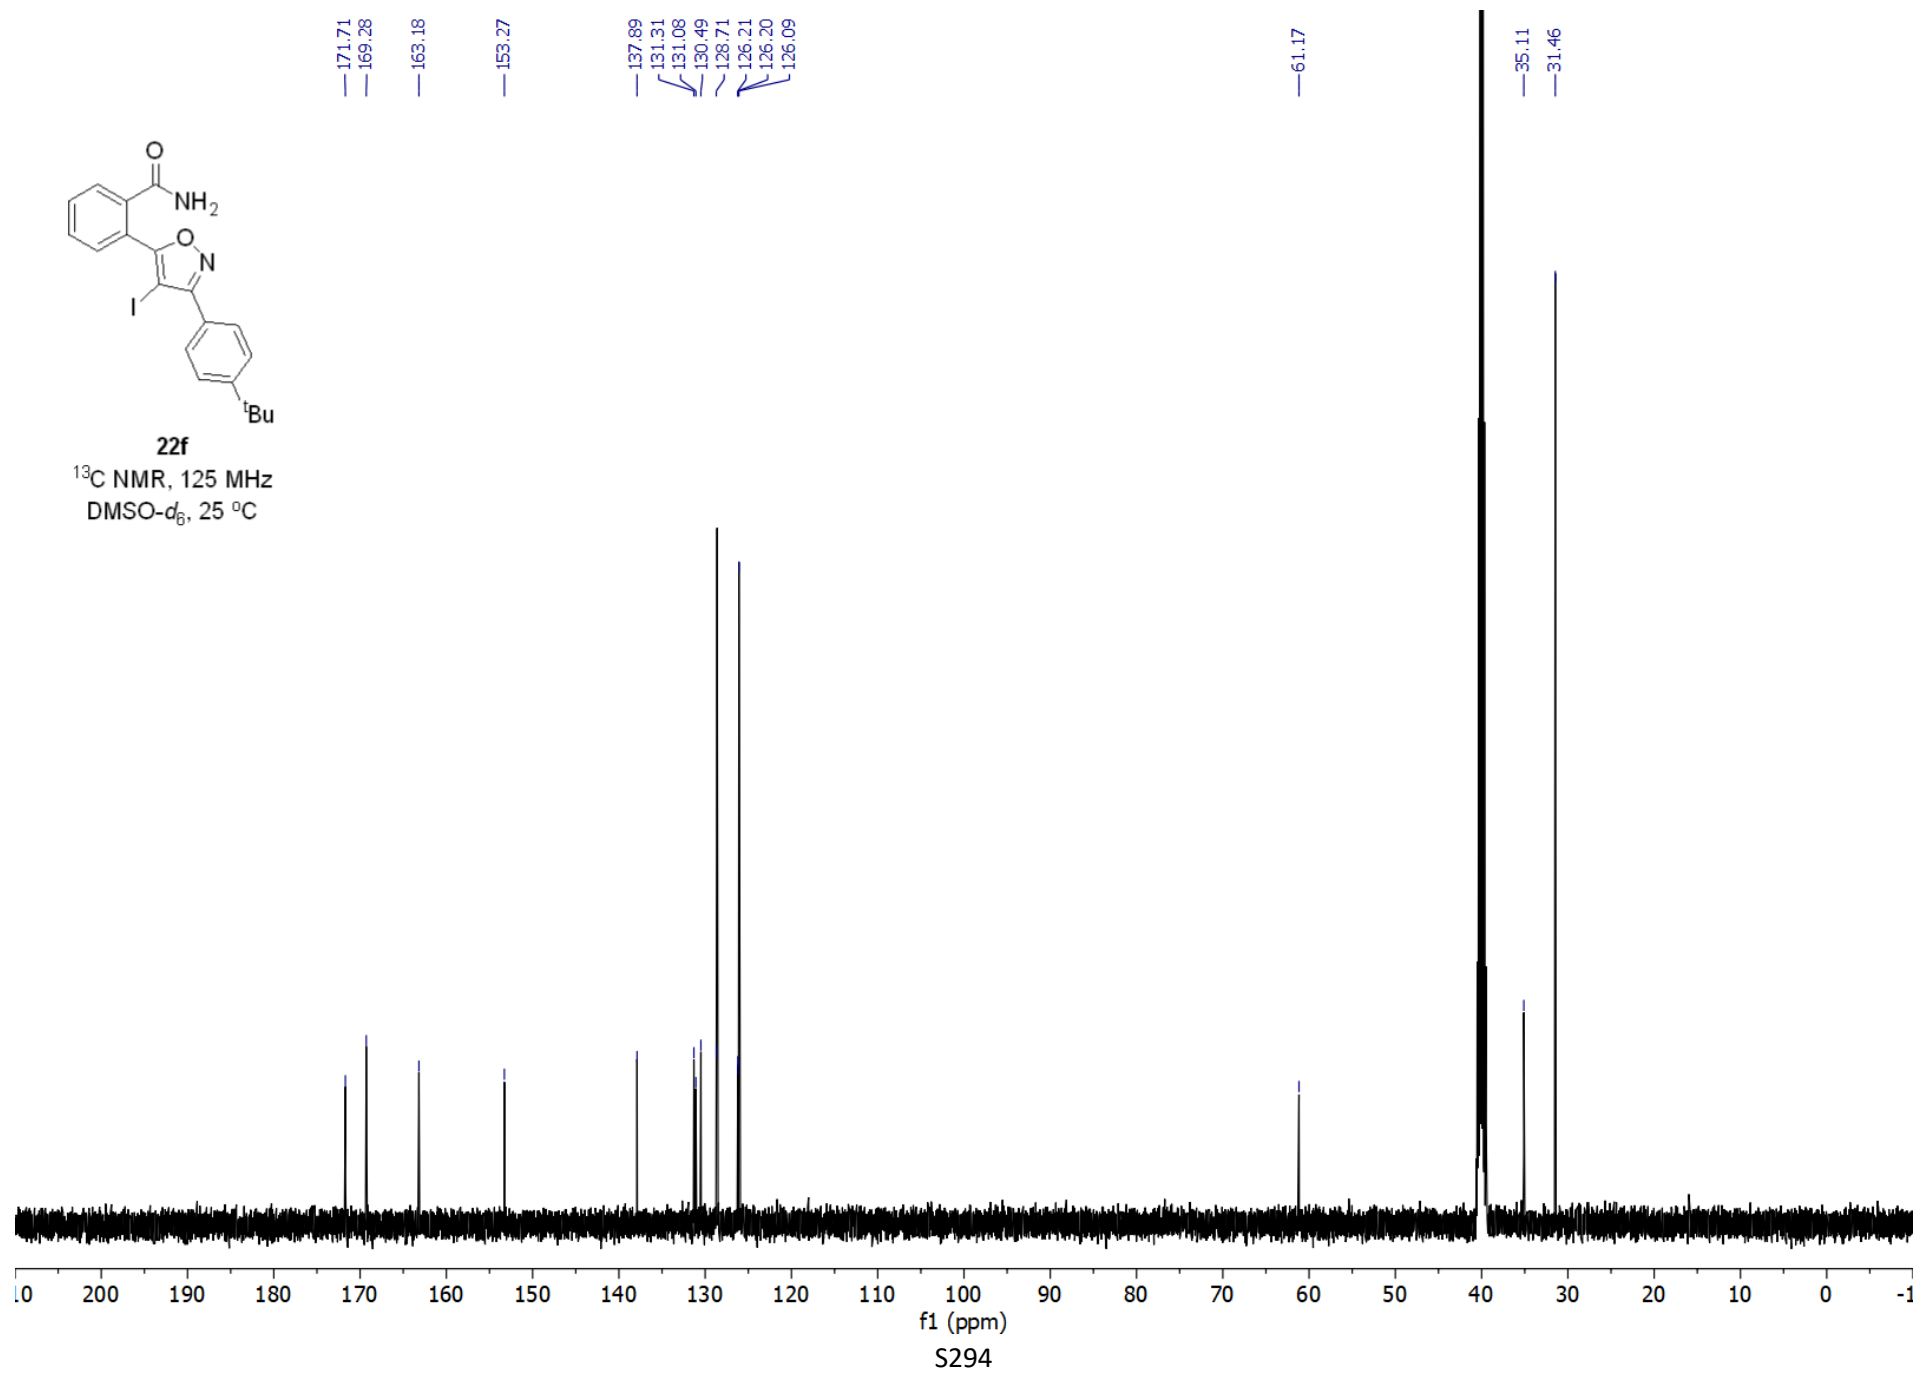

7.99  
7.85  
7.84  
7.75  
7.74  
7.74  
7.73  
7.73  
7.72  
7.71  
7.70  
7.70  
7.69  
7.69  
7.68  
7.68  
7.67  
7.67  
7.67  
7.66  
7.66  
7.65  
7.64  
7.64  
7.59  
7.58  
7.56  
7.54  
7.54  
7.52  
7.52  
7.51  
7.50  
7.49  
7.46  
7.45  
7.44  
7.44

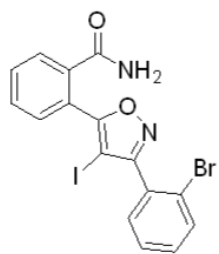

**22g**

<sup>1</sup>H NMR, 500 MHz  
DMSO-*d*<sub>6</sub>, 25 °C

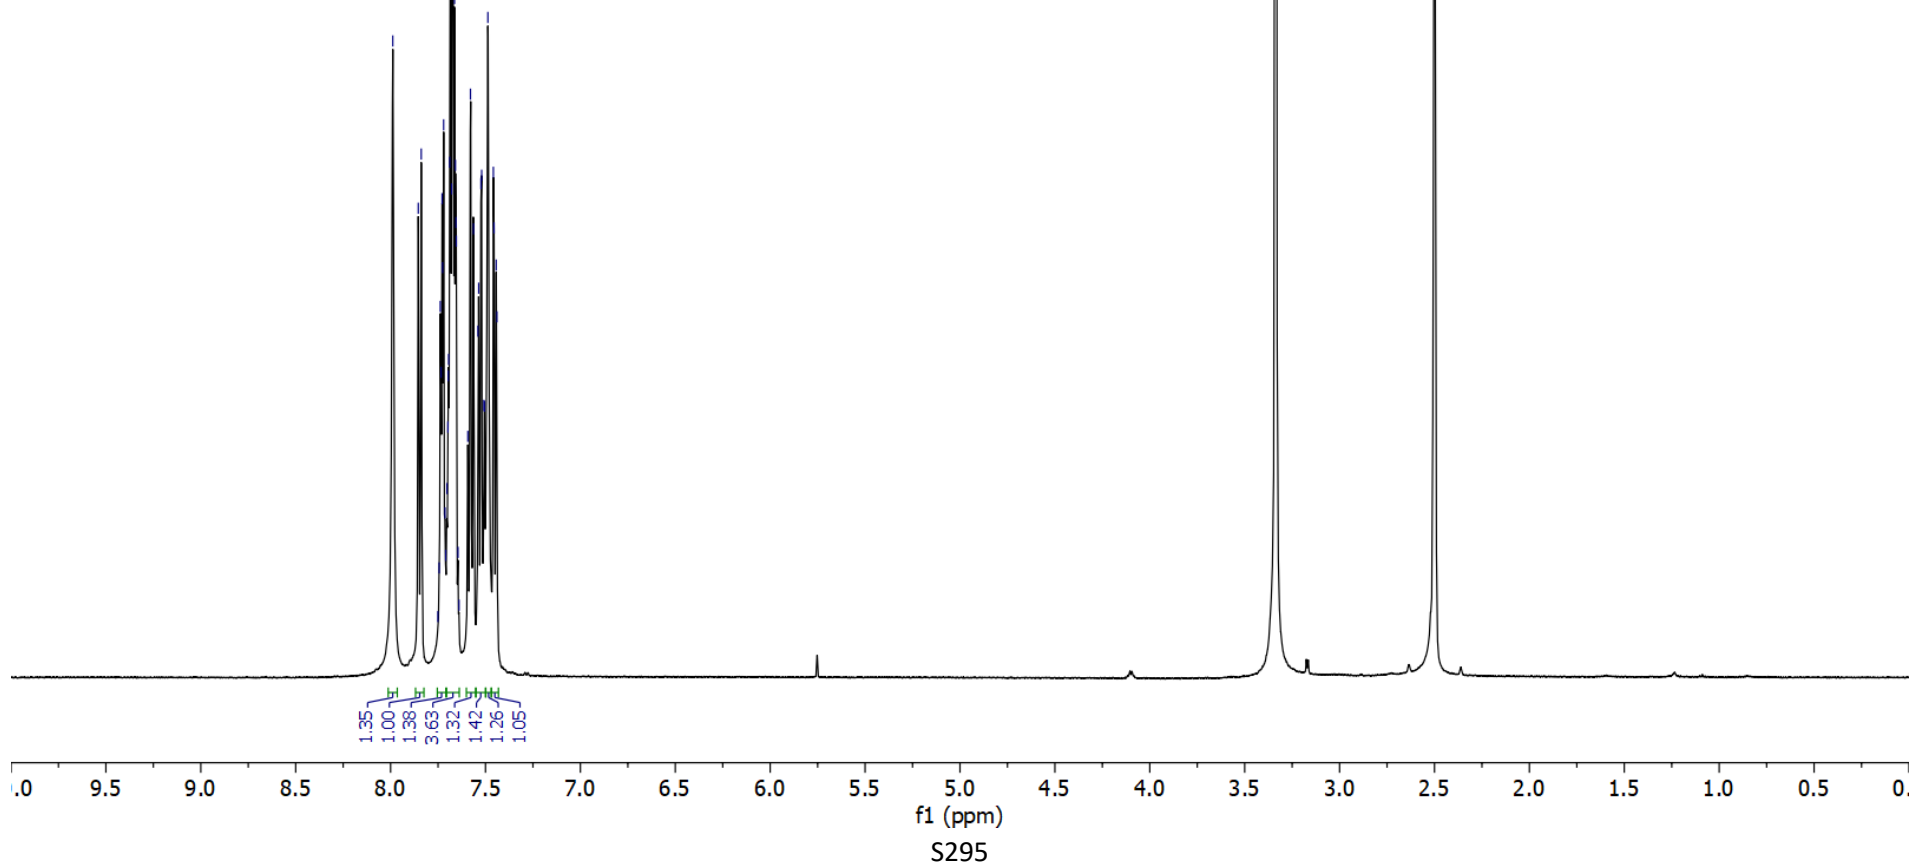

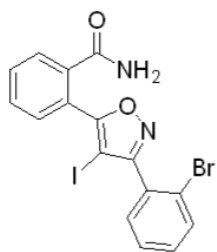

**22g**

$^{13}\text{C}$  NMR, 125 MHz  
DMSO- $d_6$ , 25 °C

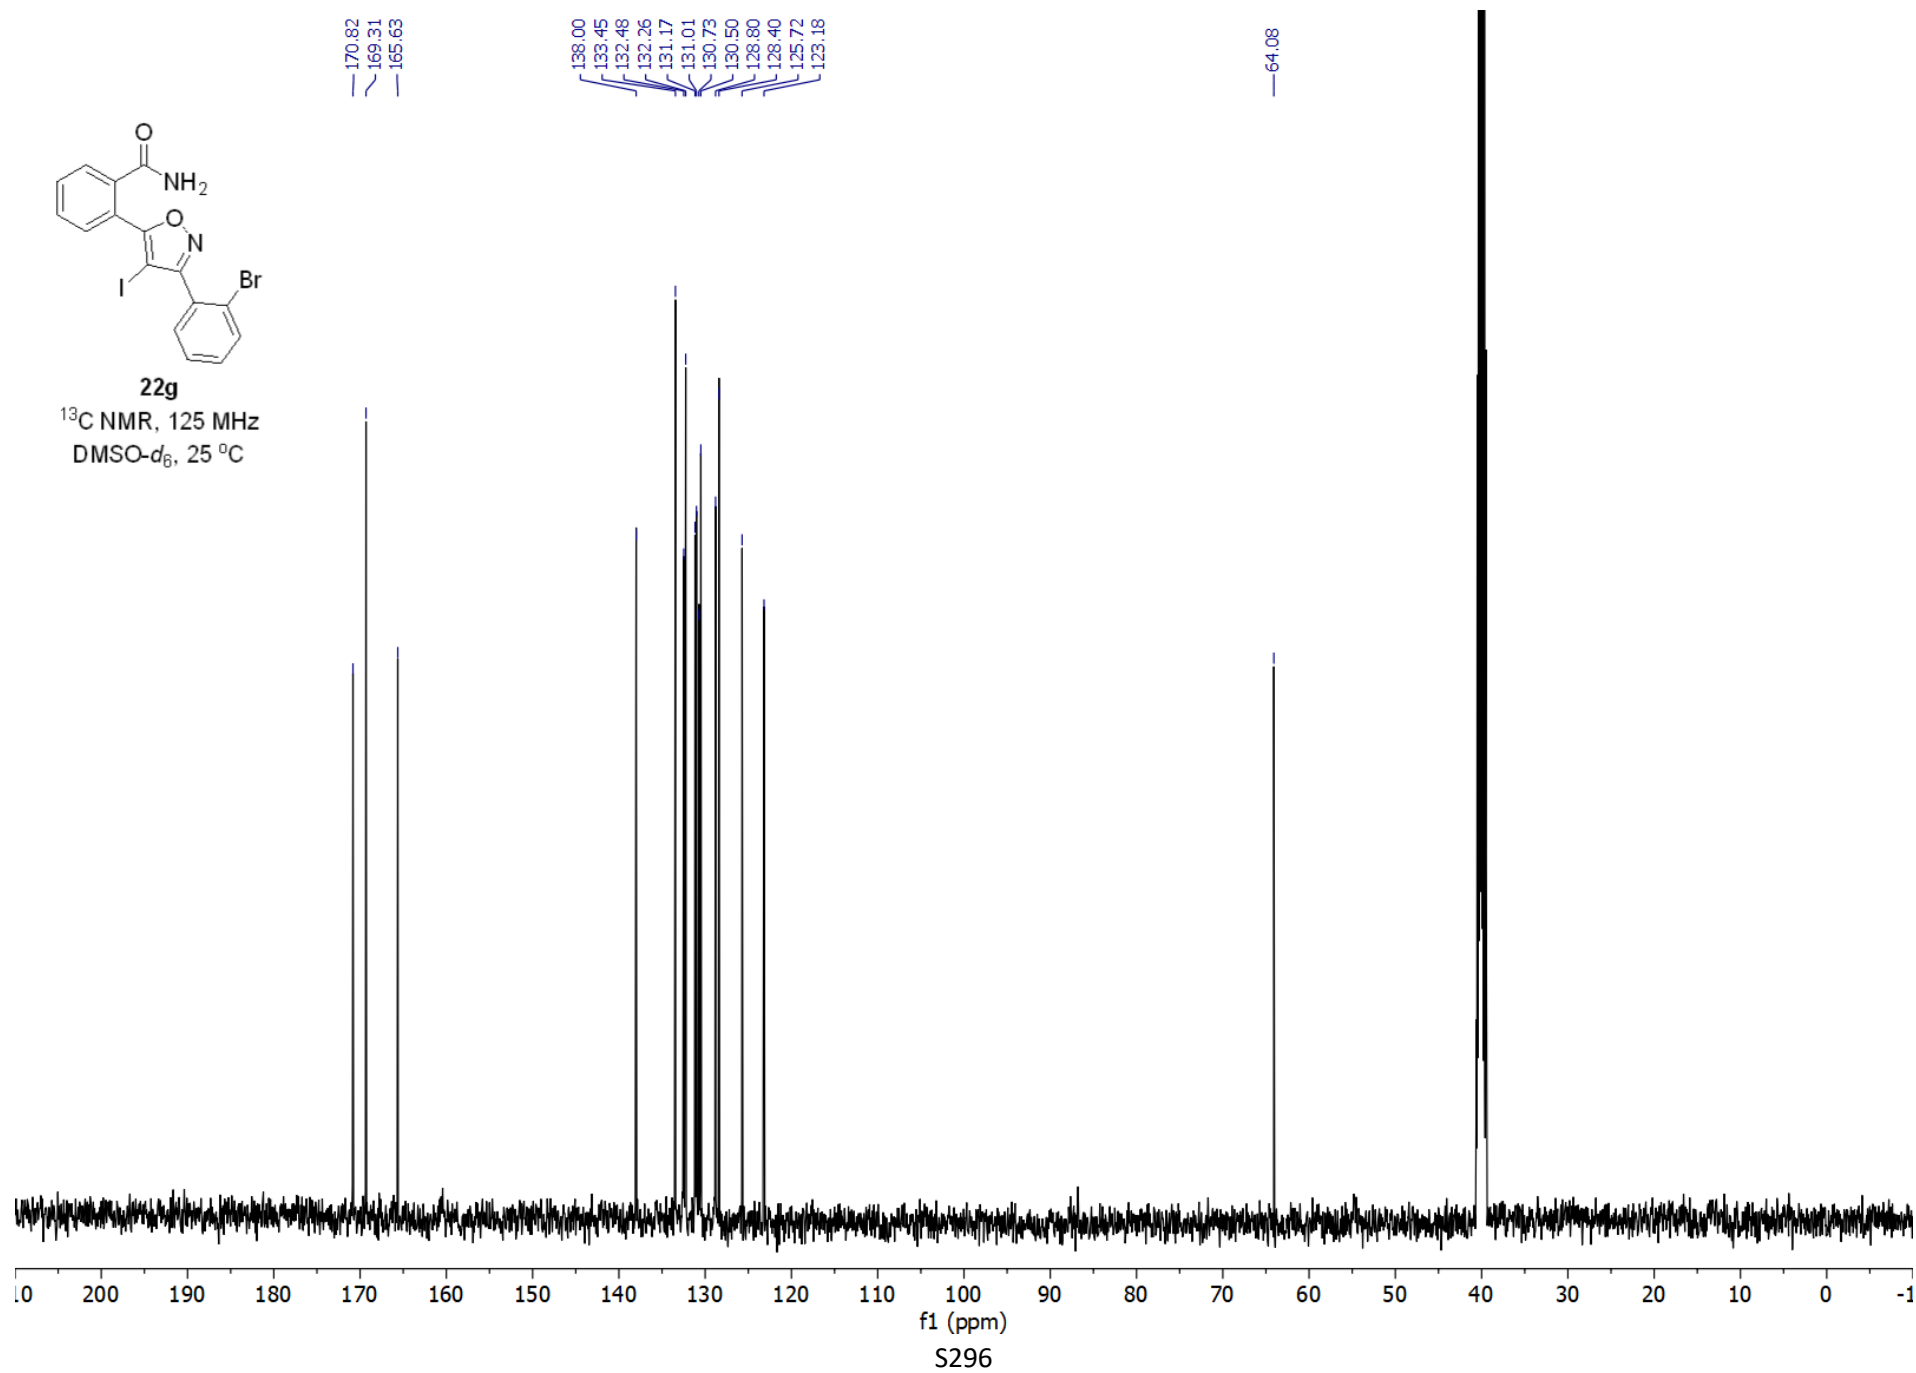

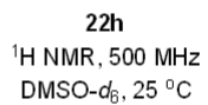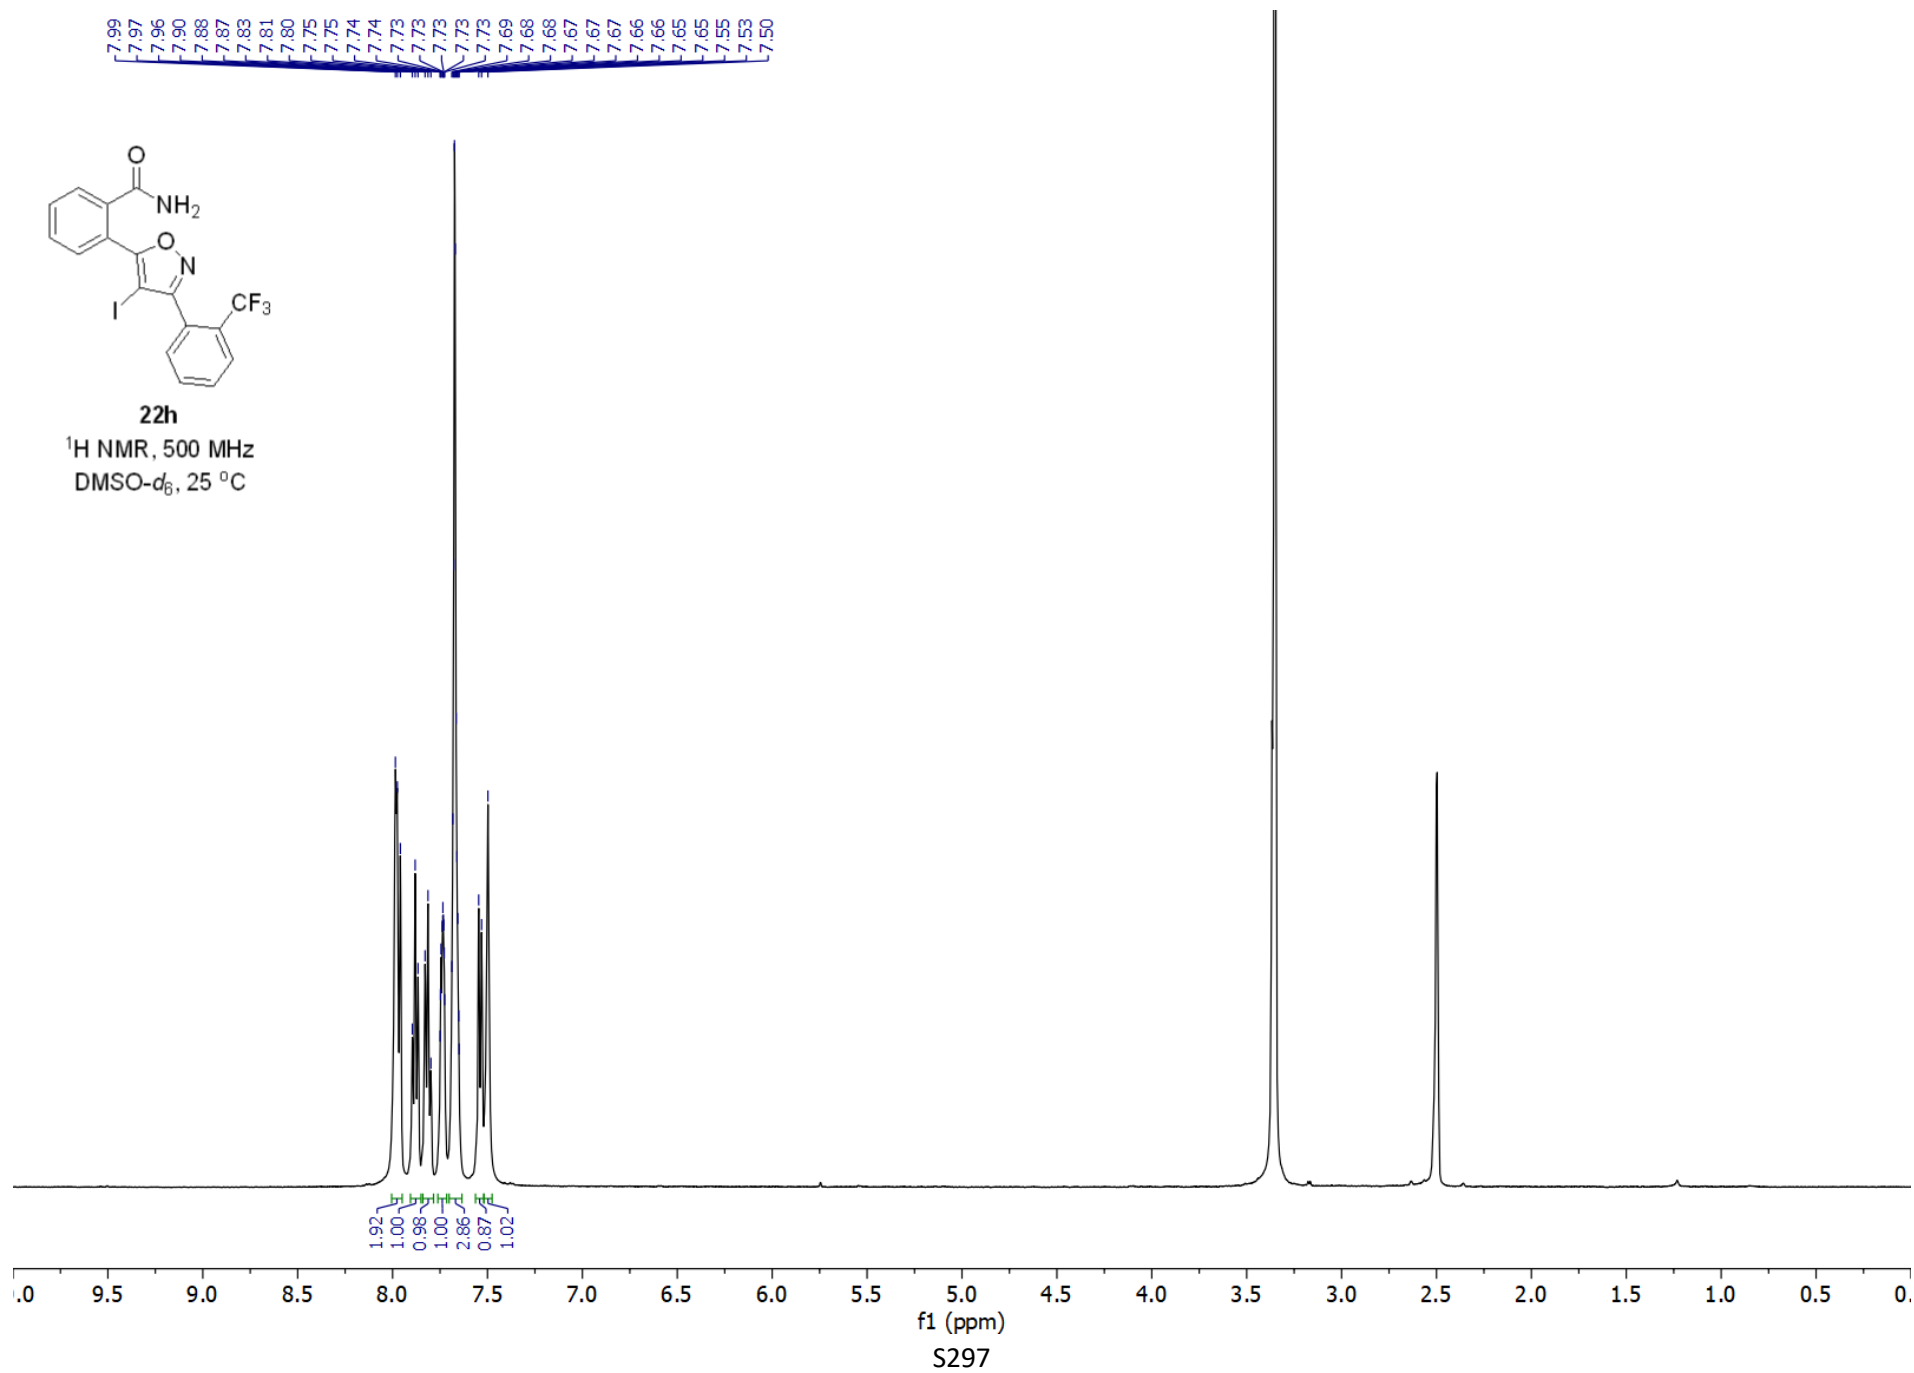

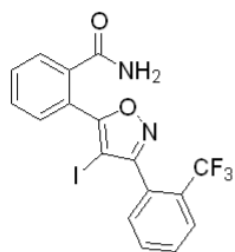

**22h**

$^{13}\text{C}$  NMR, 125 MHz  
DMSO- $d_6$ , 25 °C

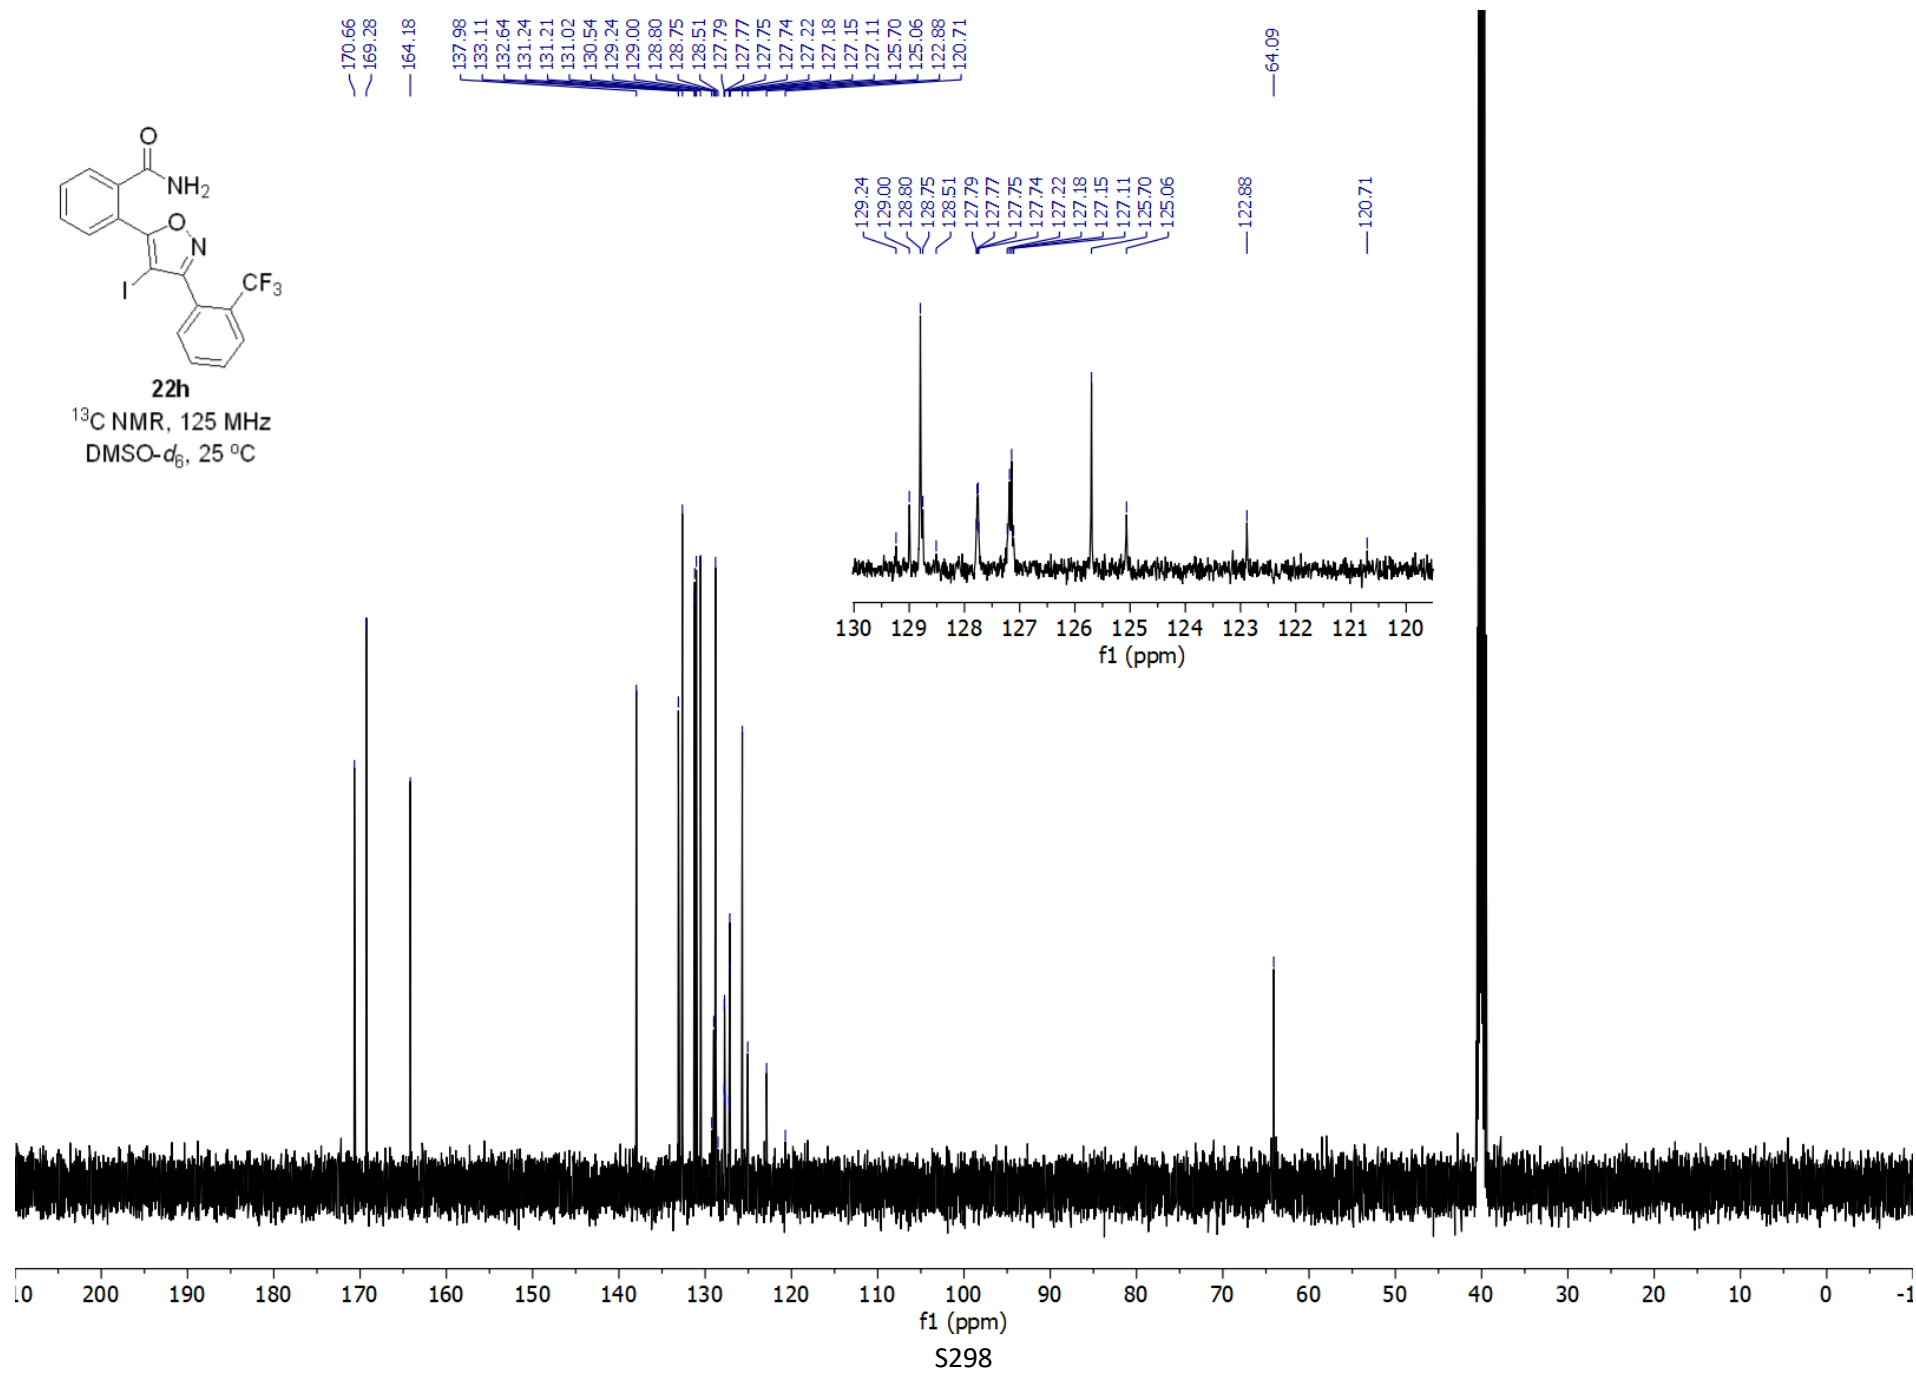

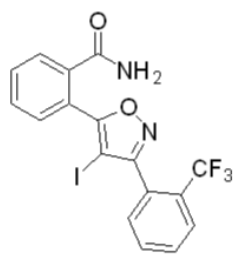

**22h**

$^{19}\text{F}$  NMR, 470 MHz

$\text{DMSO-}d_6$ , 25 °C

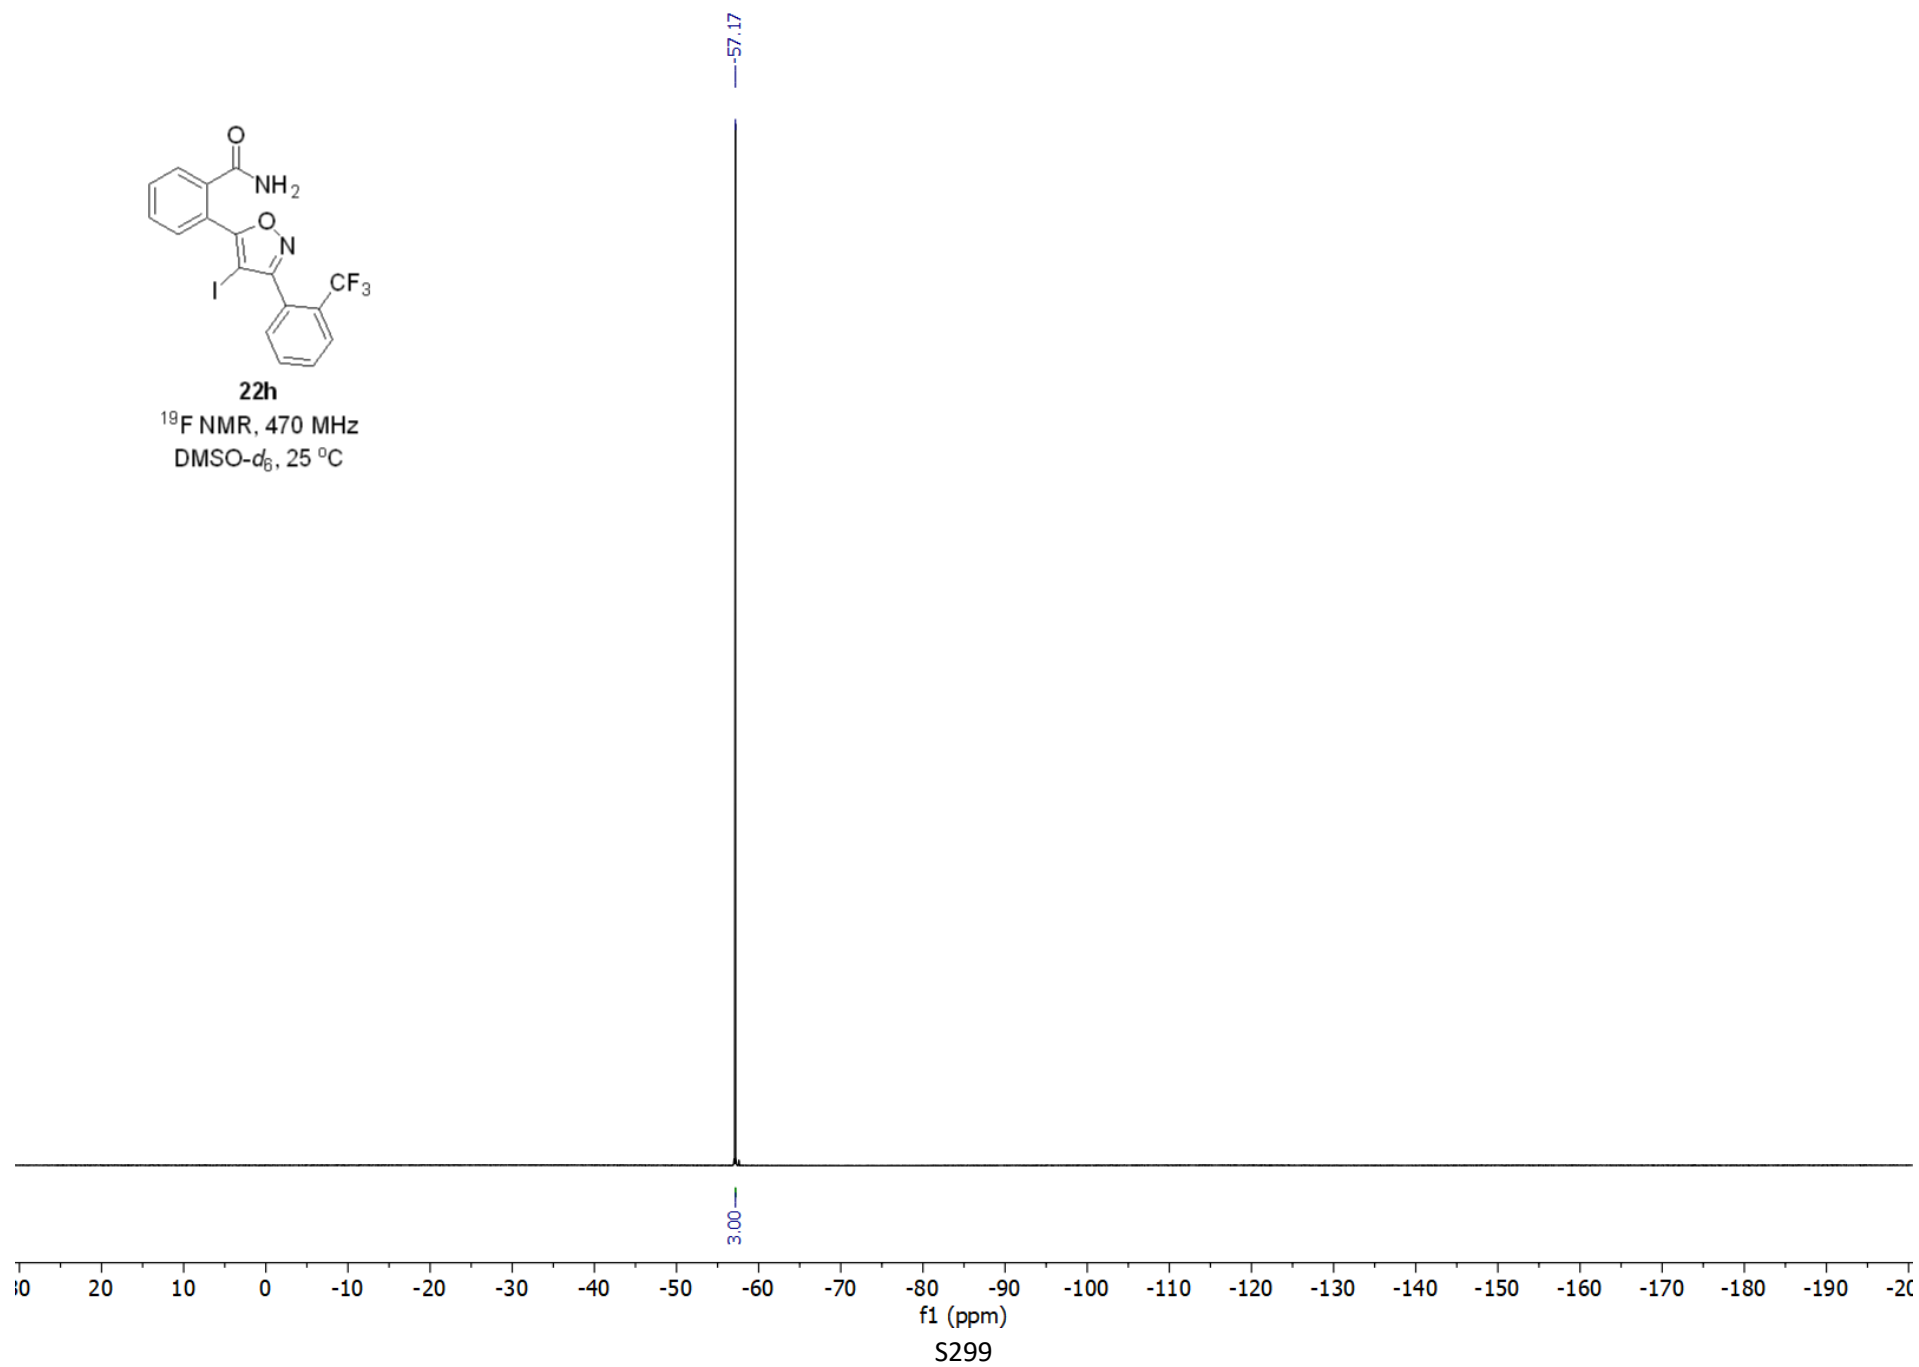

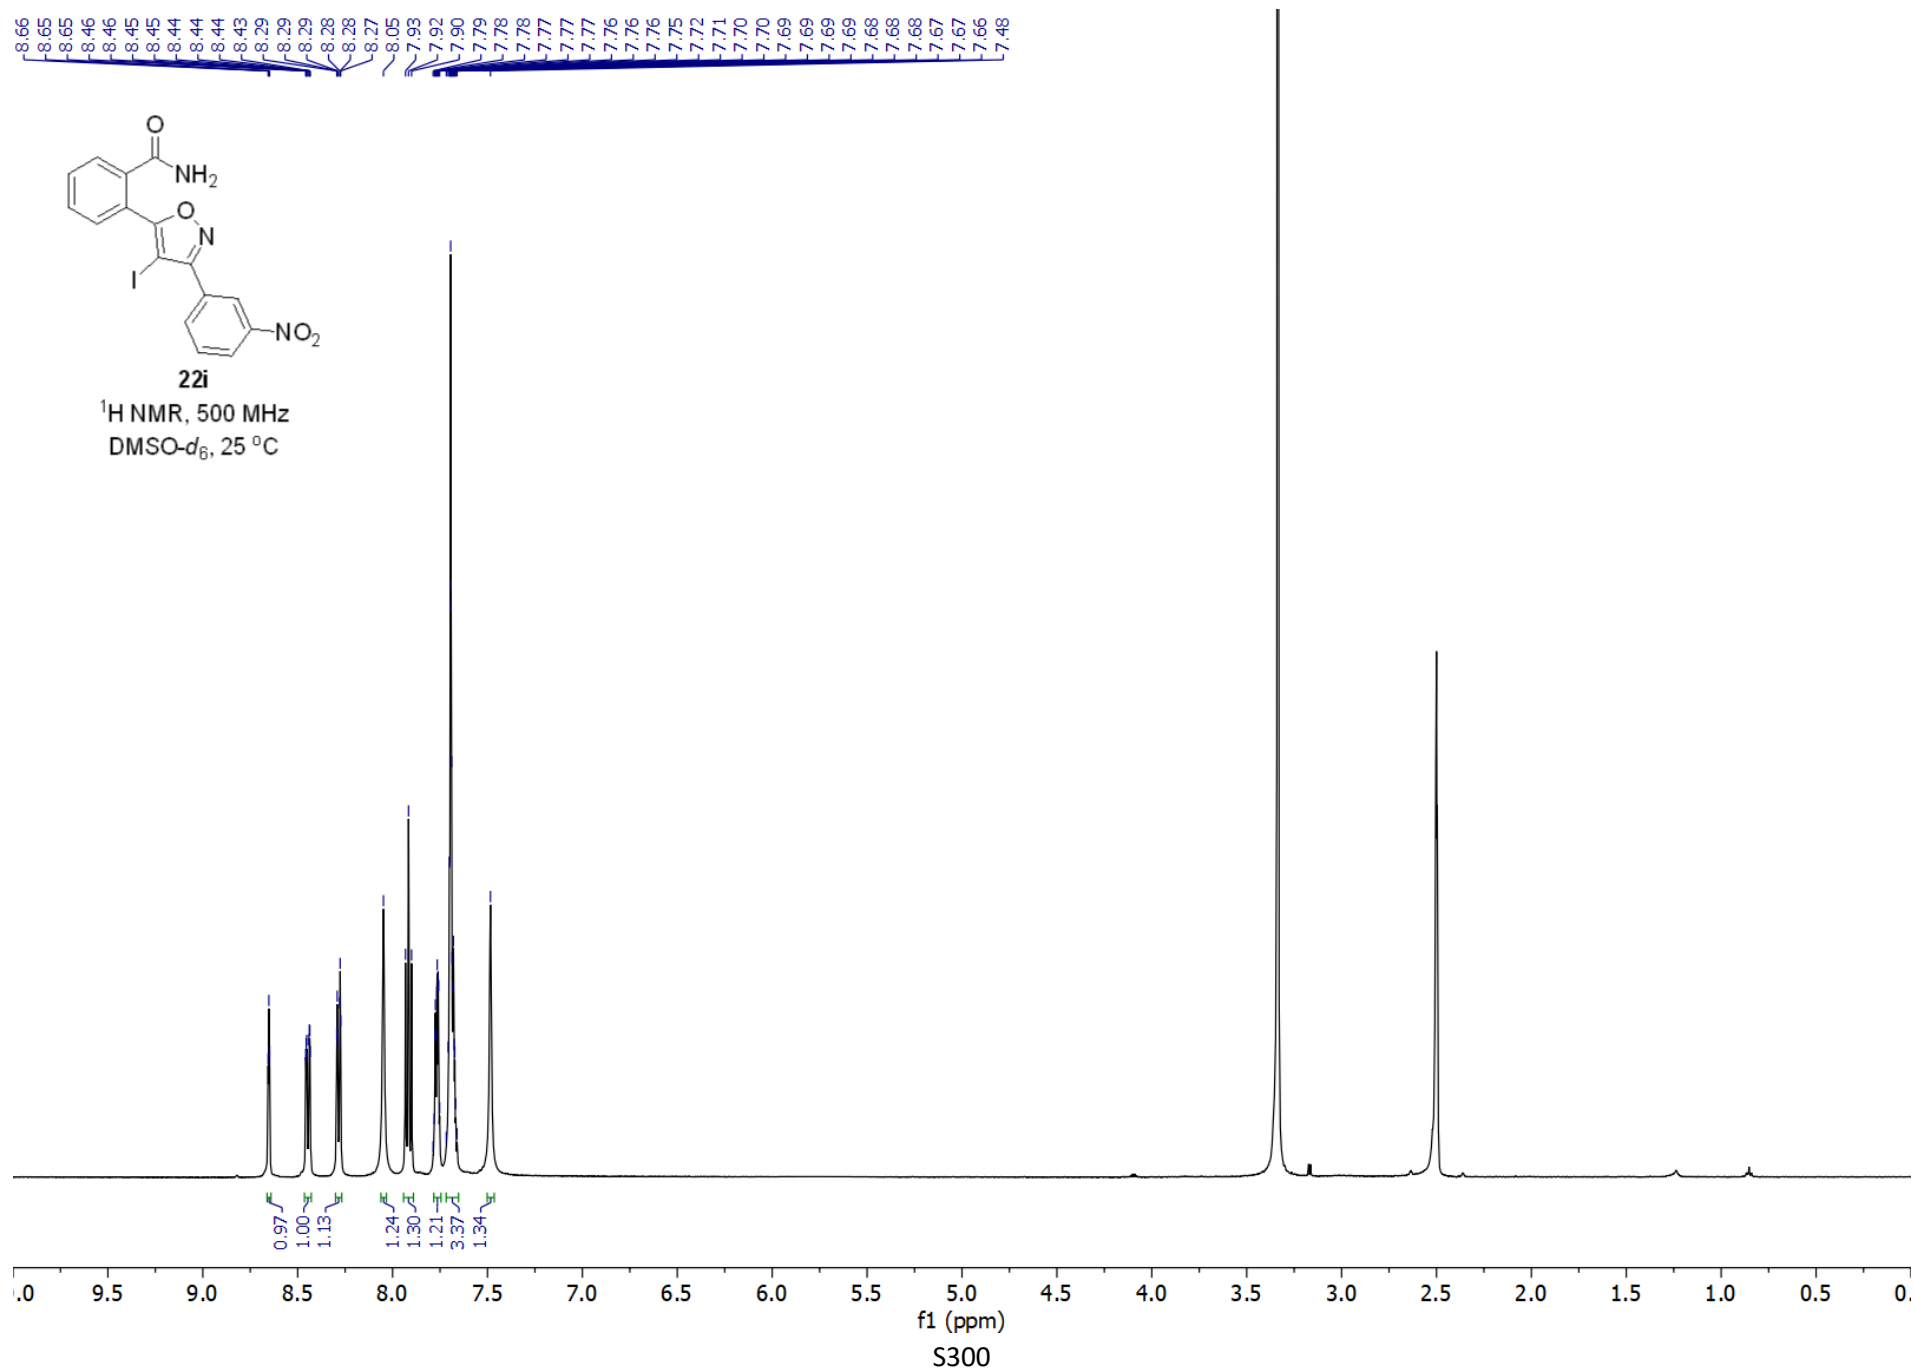

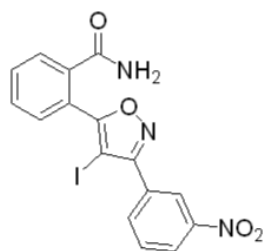

**22i**

$^{13}\text{C}$  NMR, 125 MHz  
DMSO- $d_6$ , 25 °C

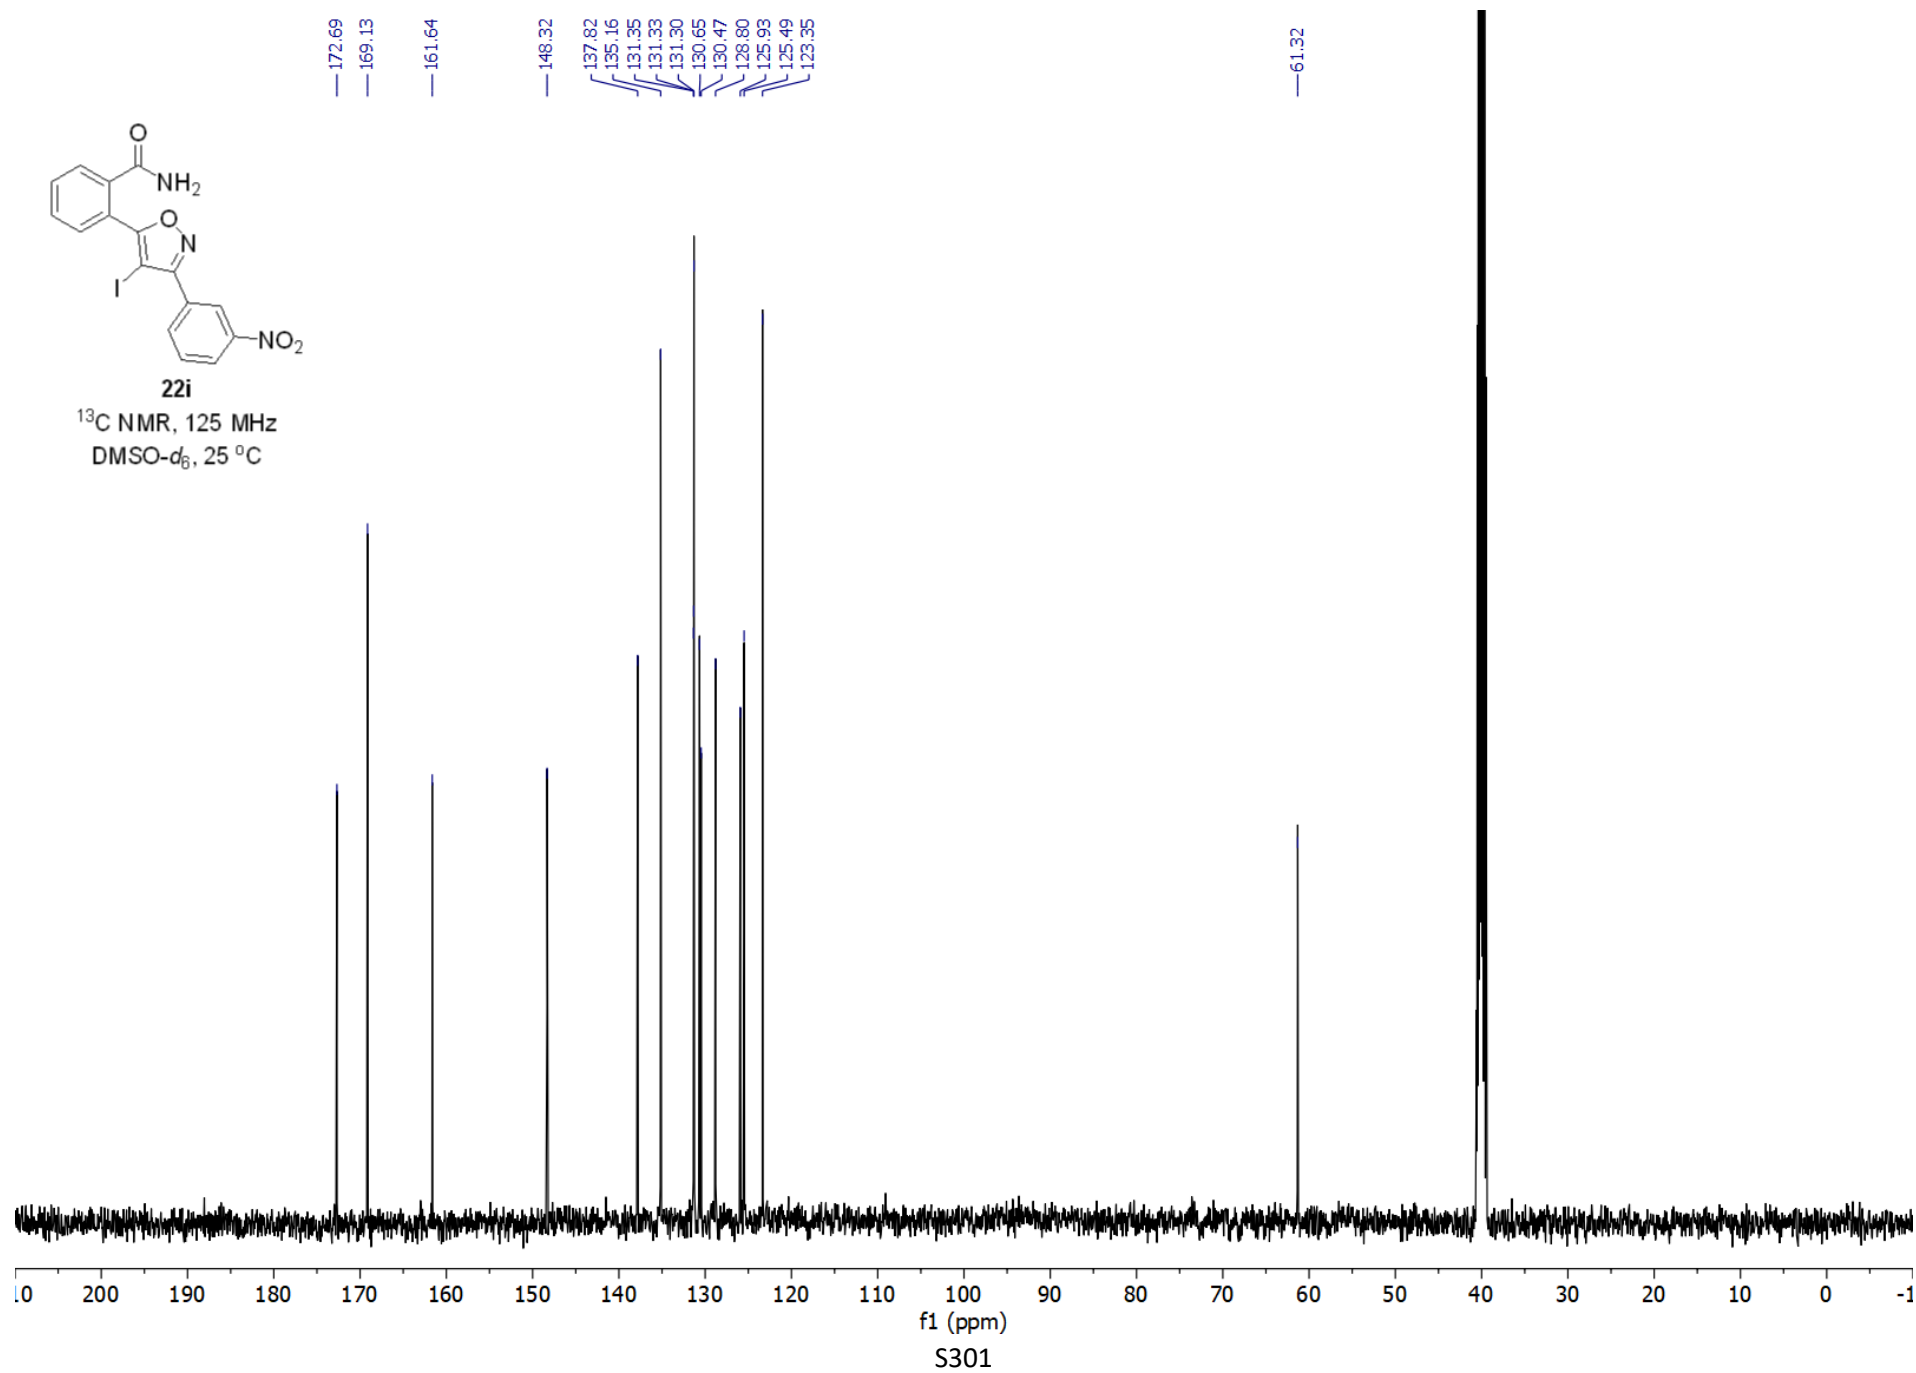

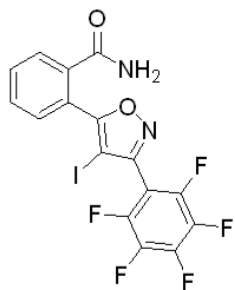

**22k**

<sup>1</sup>H NMR, 500 MHz  
DMSO-*d*<sub>6</sub>, 25 °C

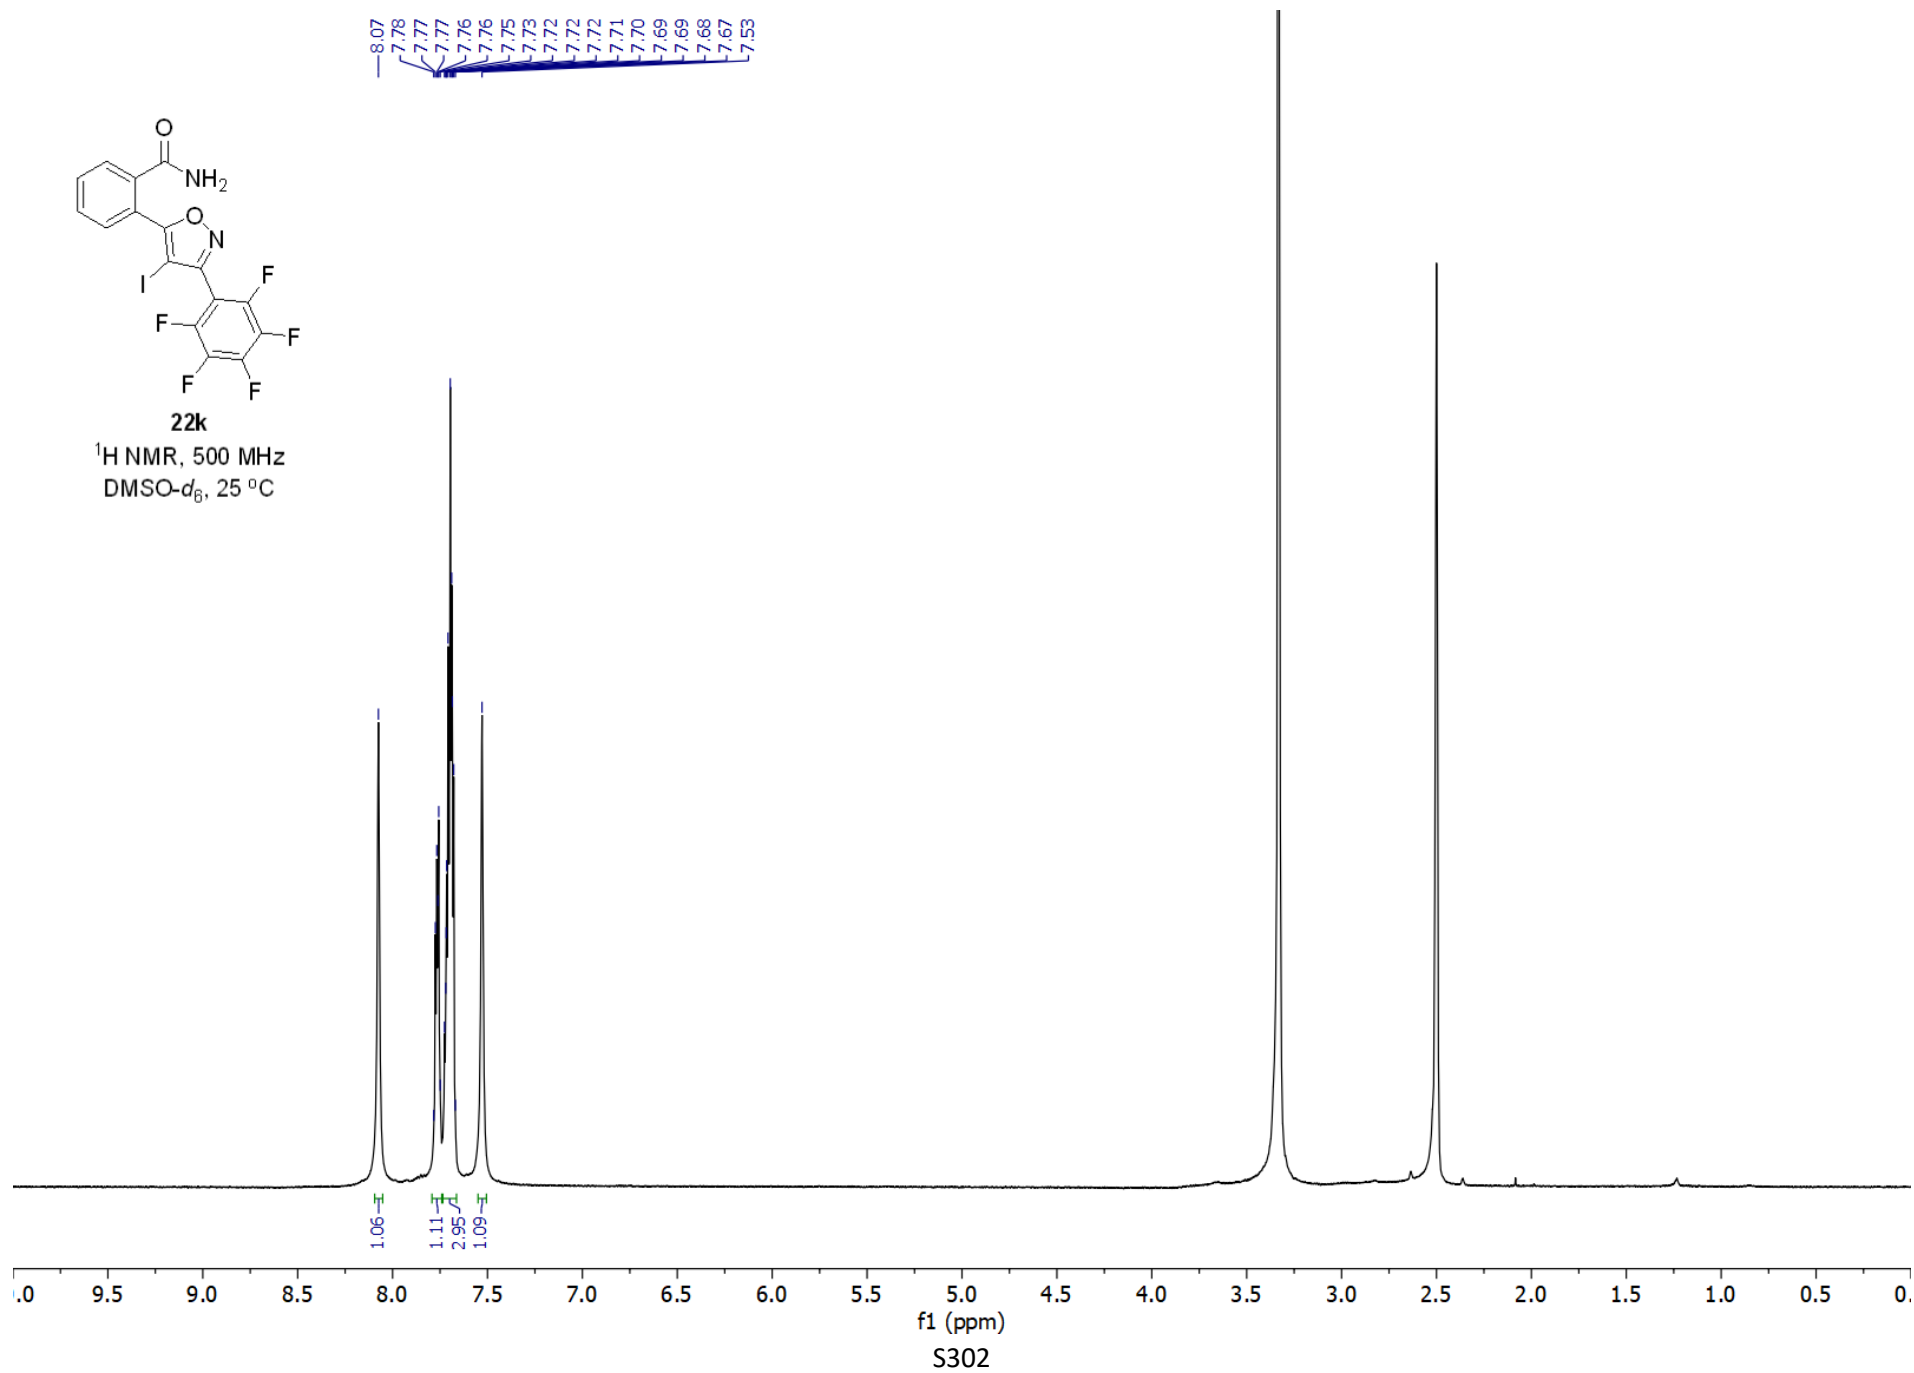

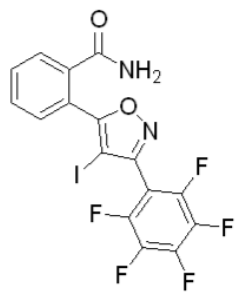

**22k**

$^{13}\text{C}$  NMR, 125 MHz  
DMSO- $d_6$ , 25 °C

— 172.76

— 169.11

— 155.36

— 137.85

— 131.52

— 131.23

— 130.71

— 128.83

— 125.29

— 63.95

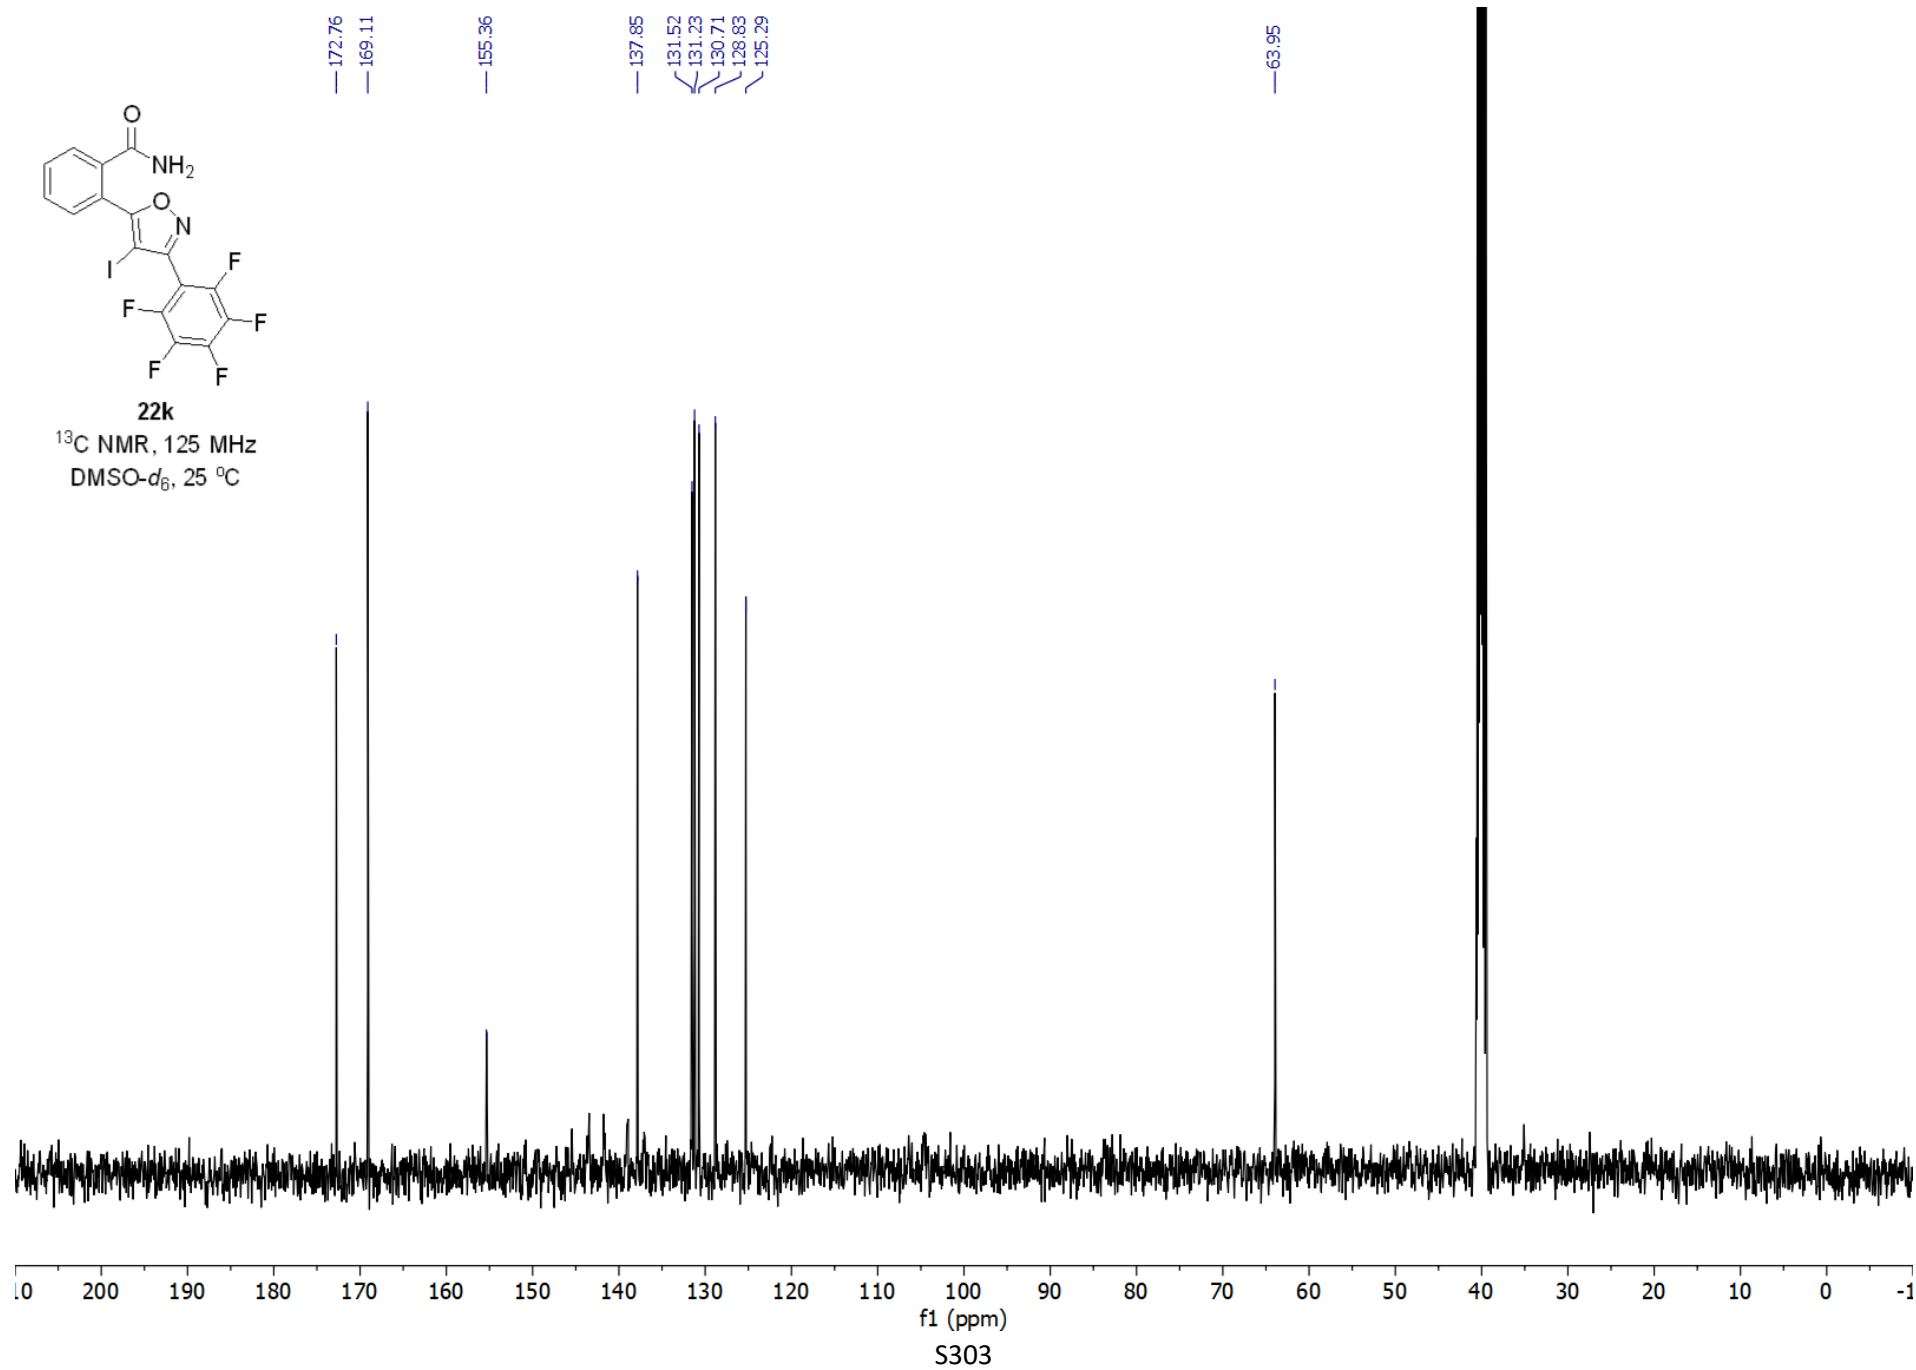

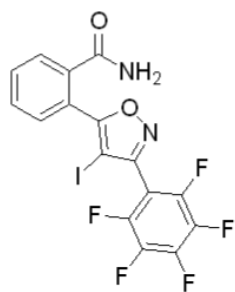

**22k**

$^{19}\text{F}$  NMR, 470 MHz

DMSO- $d_6$ , 25 °C

138.56  
138.57  
138.59  
138.62  
138.64  
149.43  
149.47  
149.52  
160.57  
160.58  
160.59  
160.62  
160.64  
160.67  
160.68  
160.69

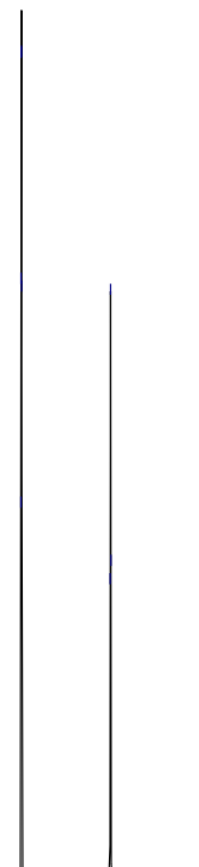

1.97  
1.00  
2.00

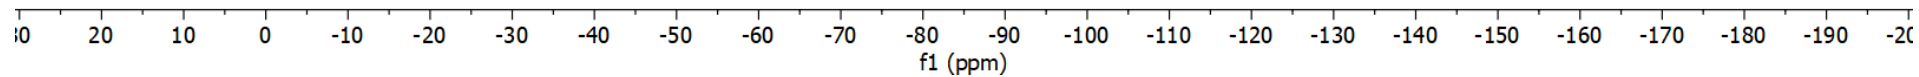

S304

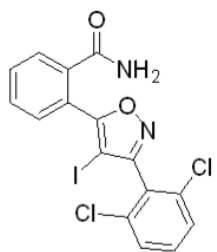

**22I**

$^1\text{H}$  NMR, 500 MHz  
DMSO- $d_6$ , 25  $^\circ\text{C}$

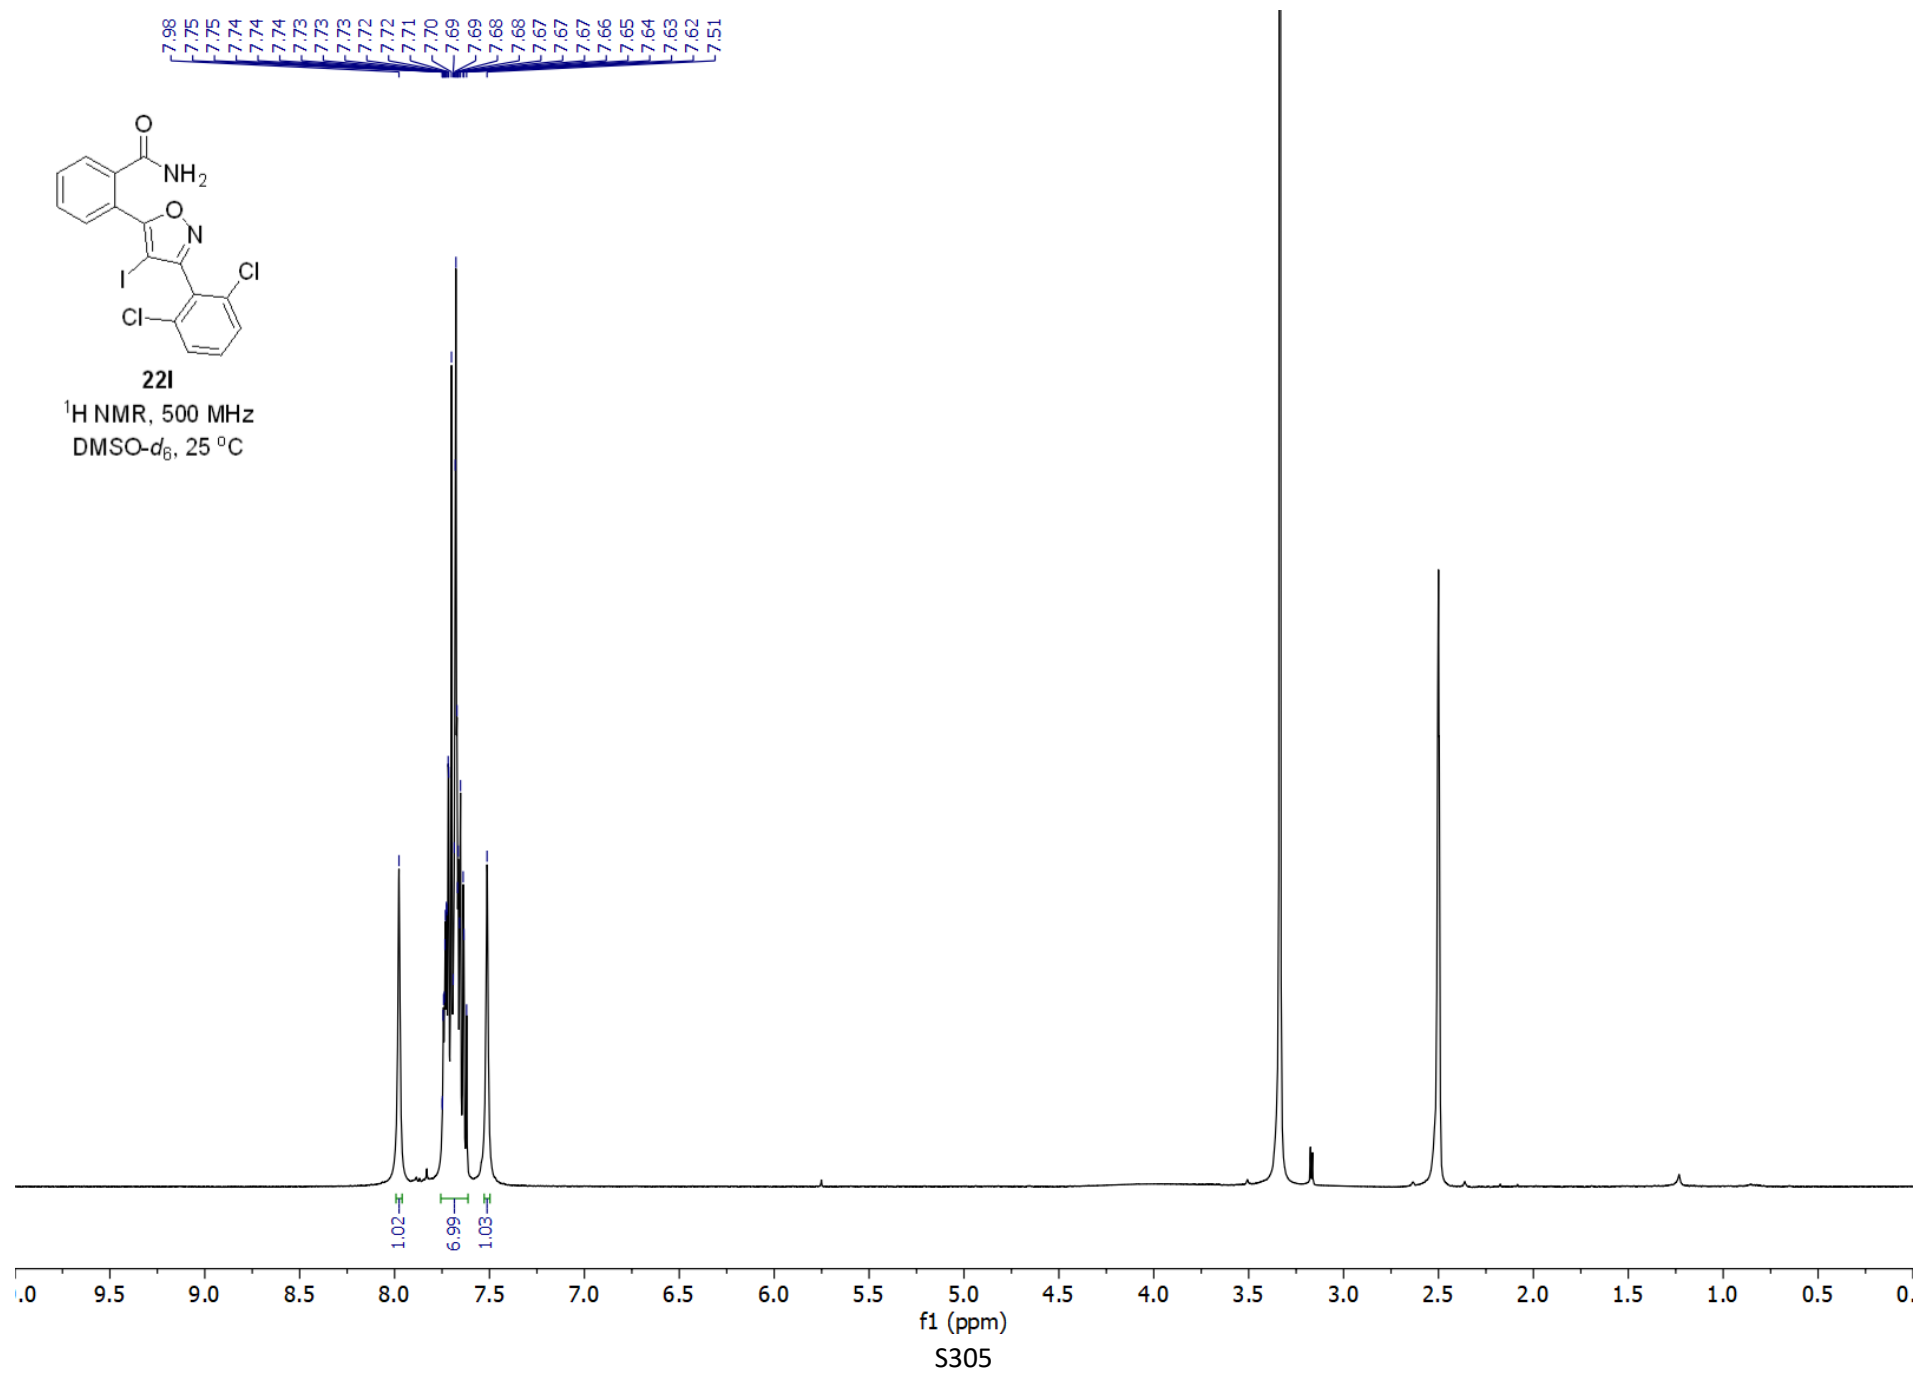

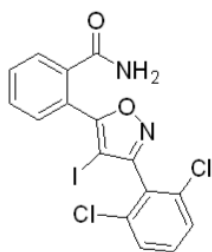

**221**

$^{13}\text{C}$  NMR, 125 MHz  
DMSO- $d_6$ , 25 °C

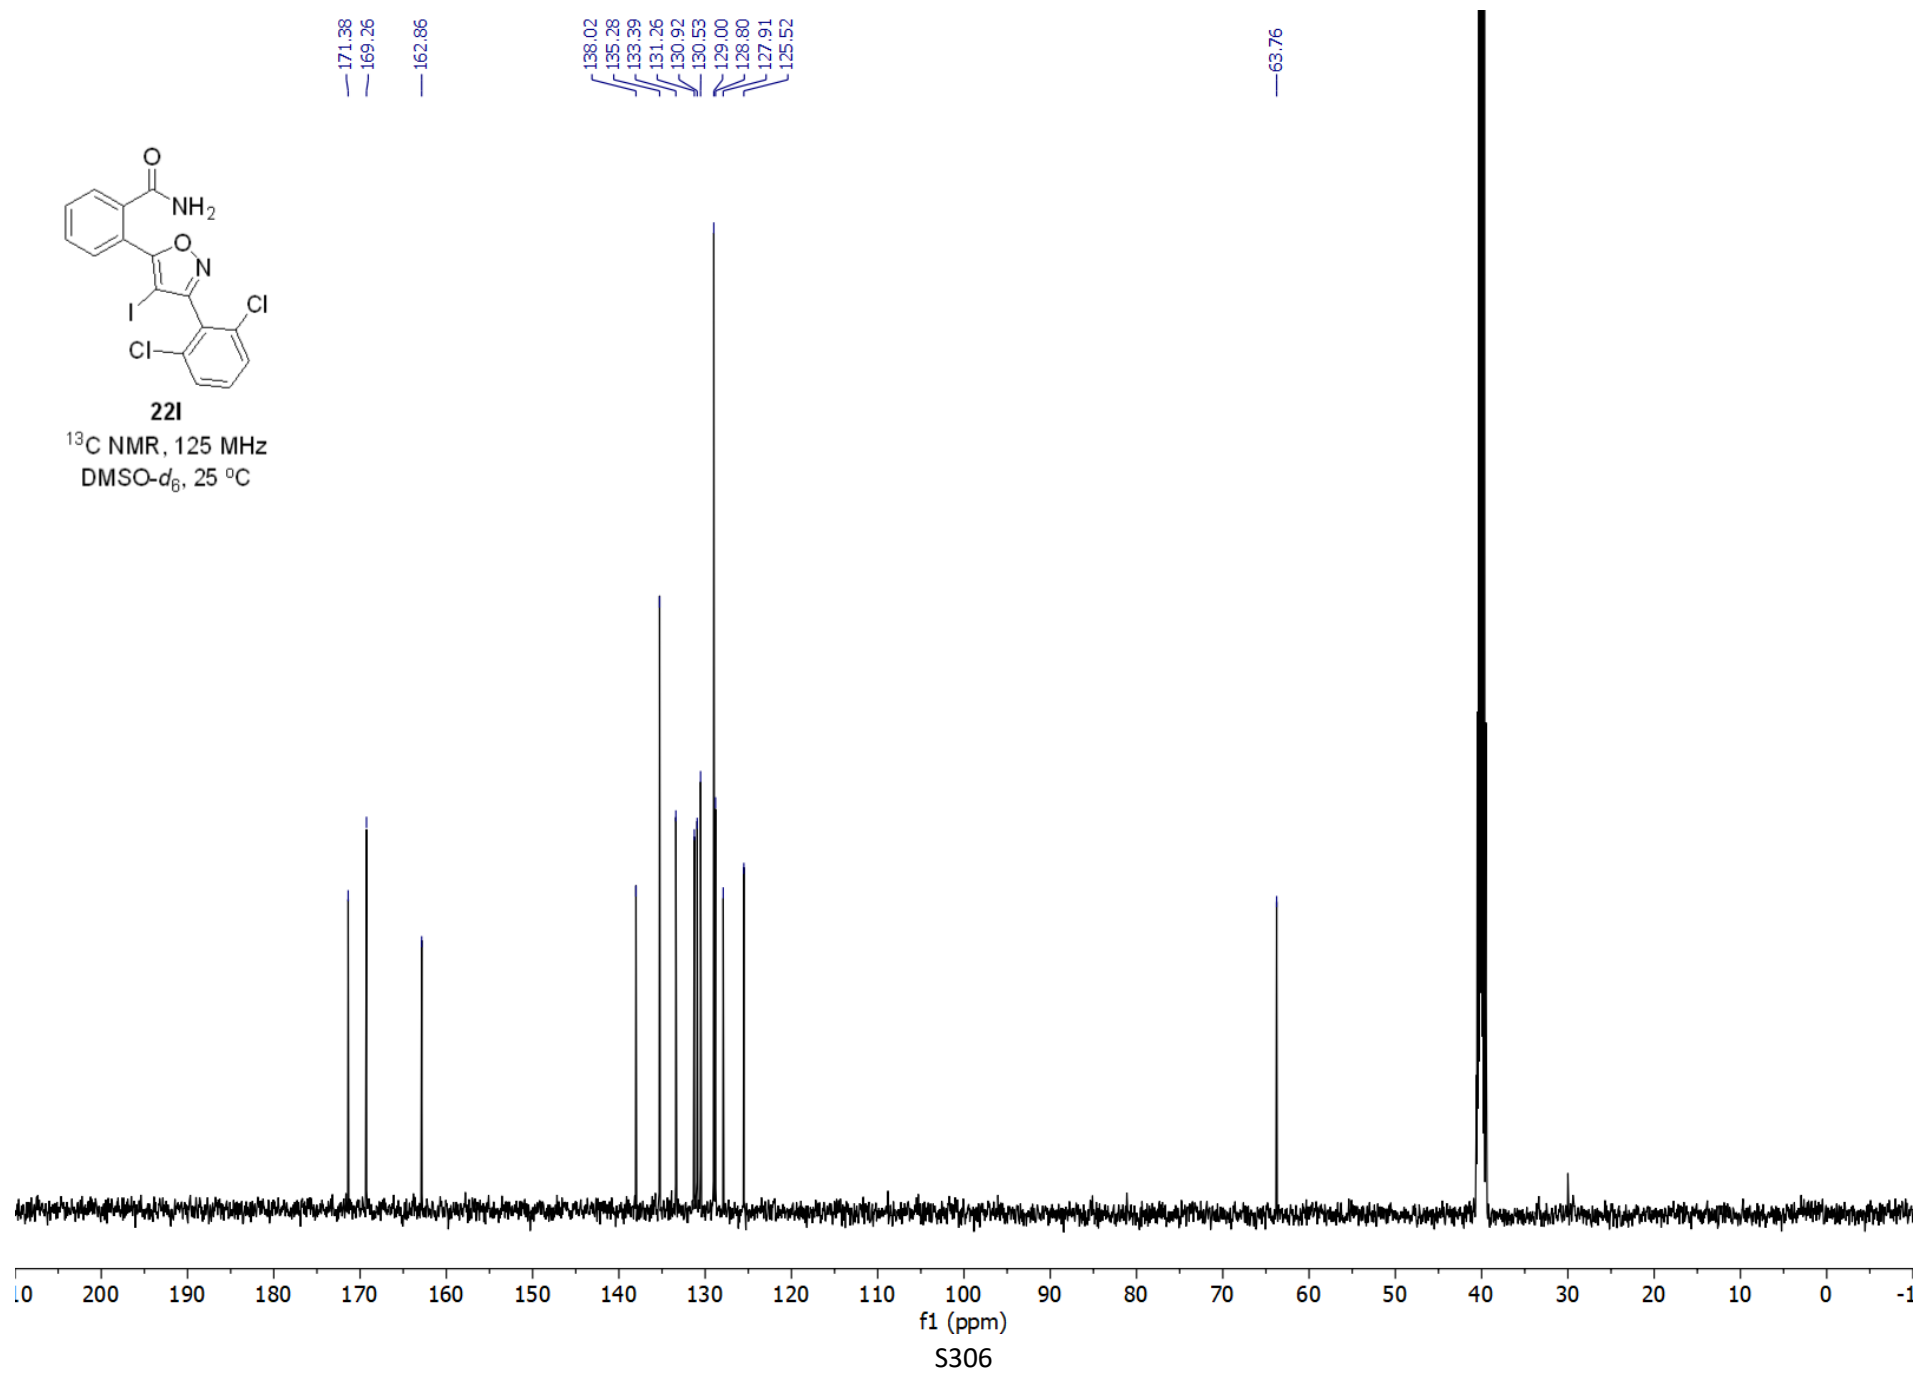

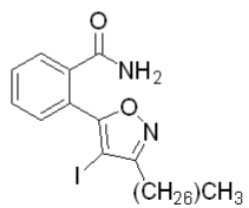

**22o**

$^1\text{H}$  NMR, 500 MHz  
 $\text{CDCl}_3$ , 25  $^\circ\text{C}$

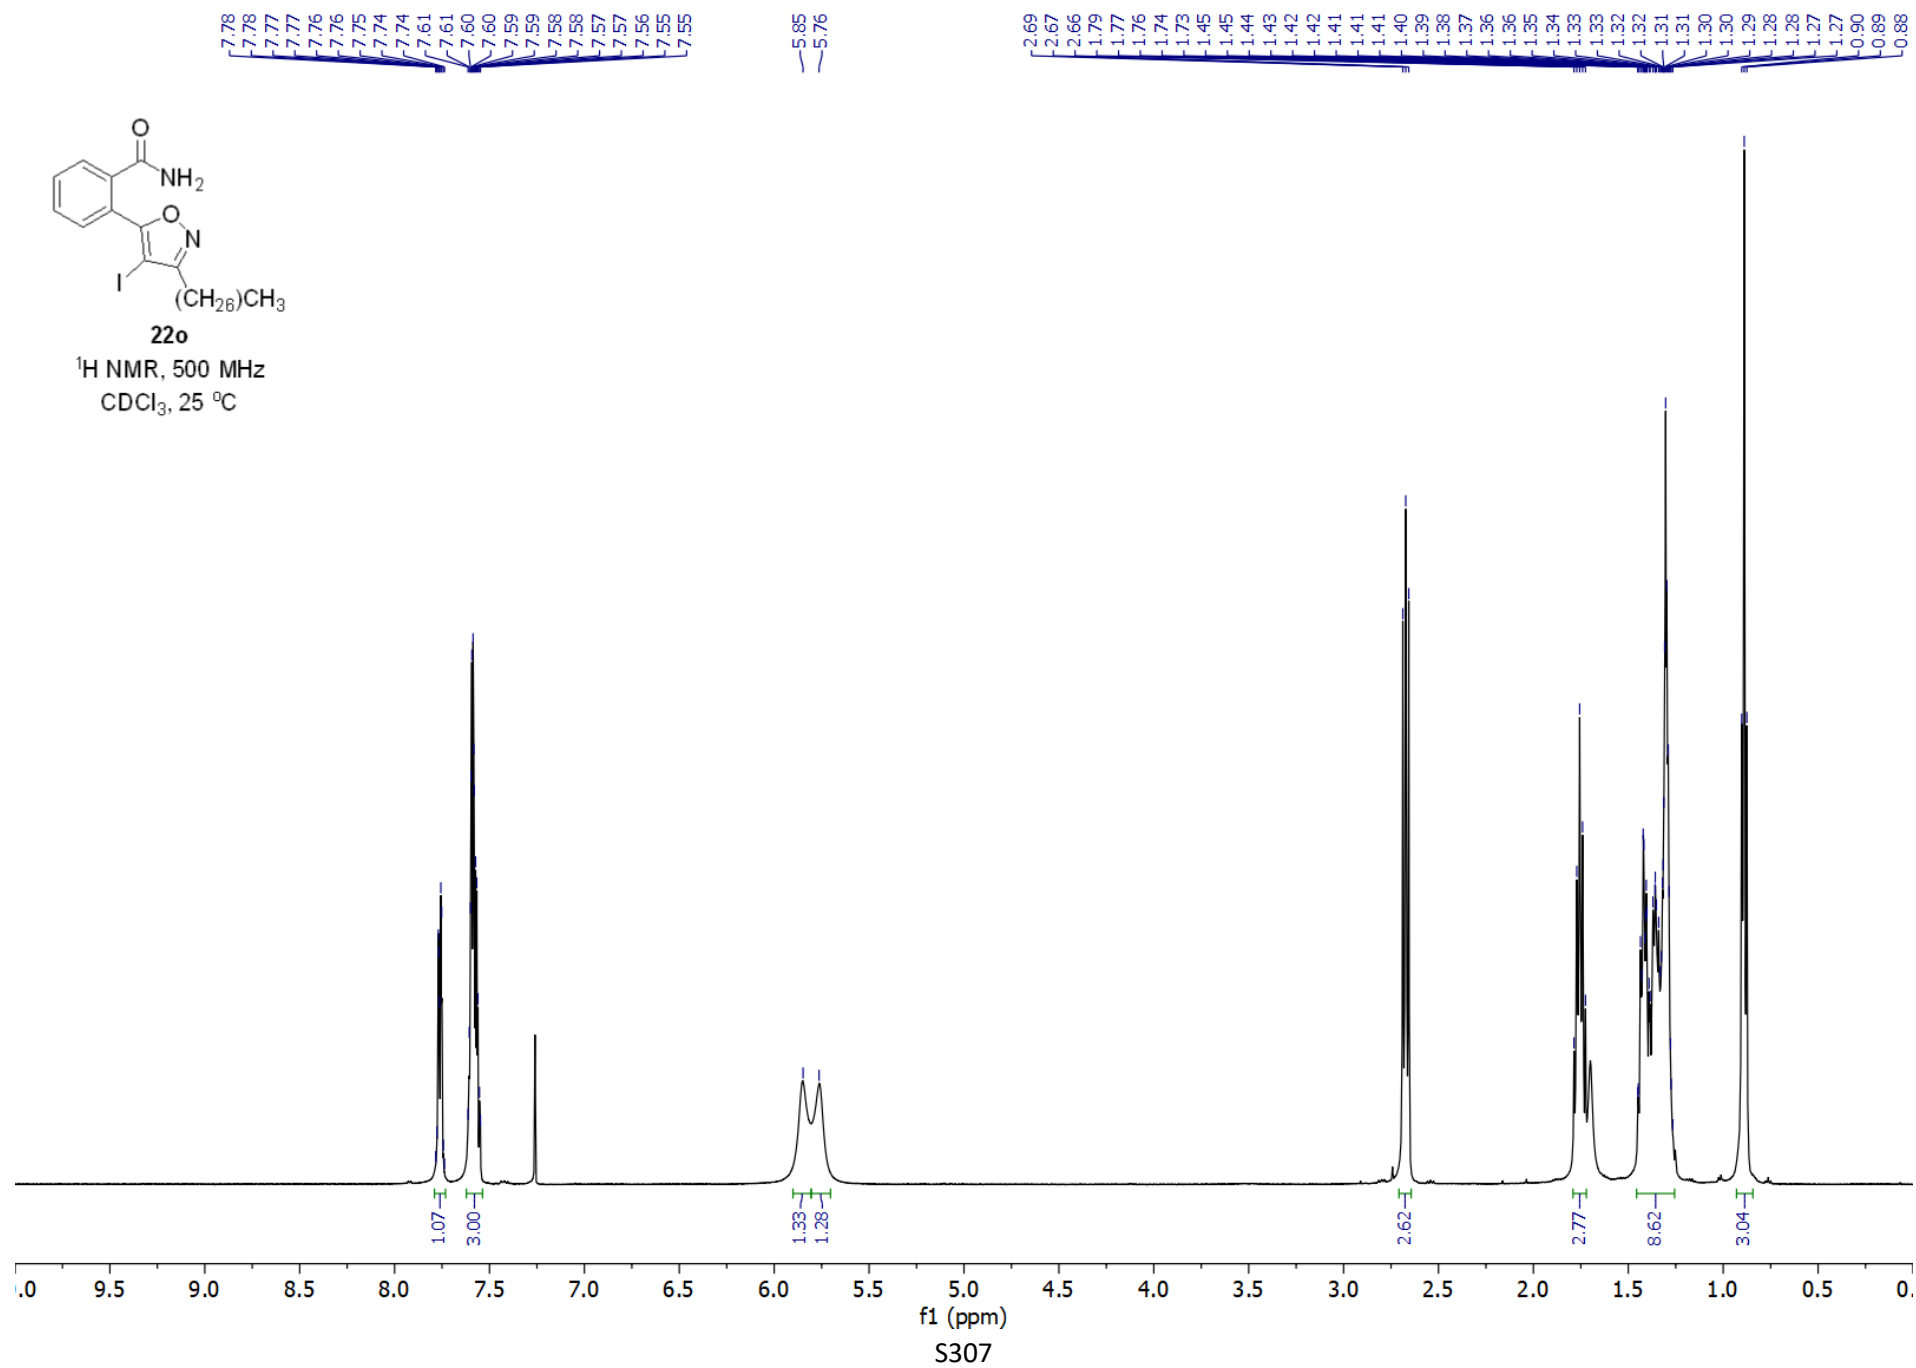

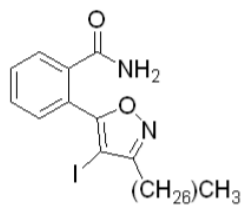

**22o**

$^{13}\text{C}$  NMR, 125 MHz

$\text{CDCl}_3$ , 25  $^\circ\text{C}$

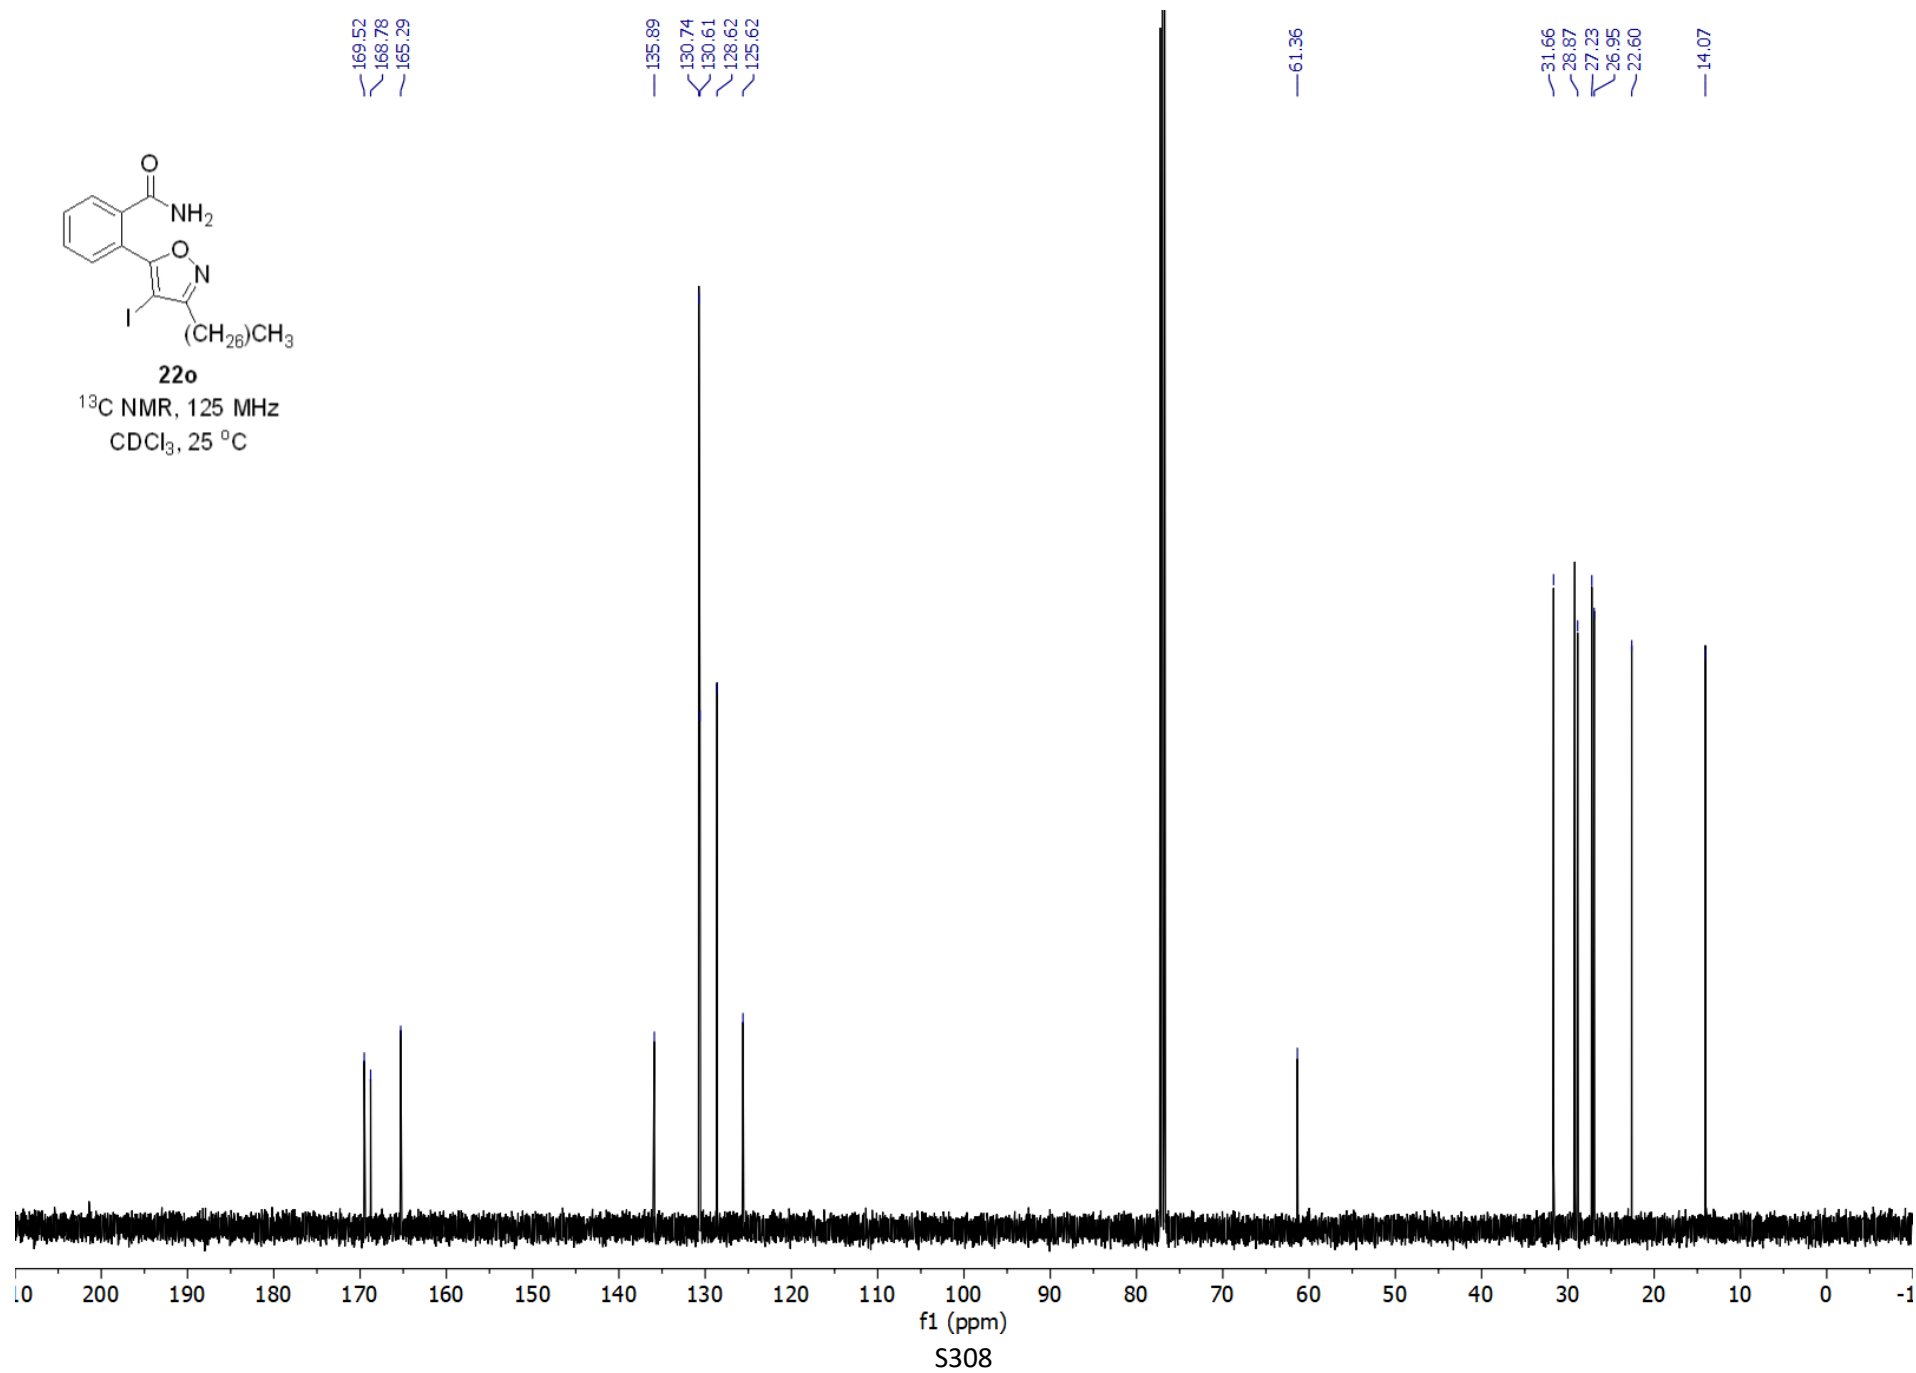

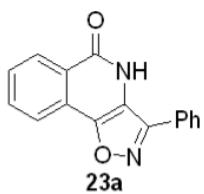

<sup>1</sup>H NMR, 500 MHz  
DMSO-d<sub>6</sub>, 25 °C

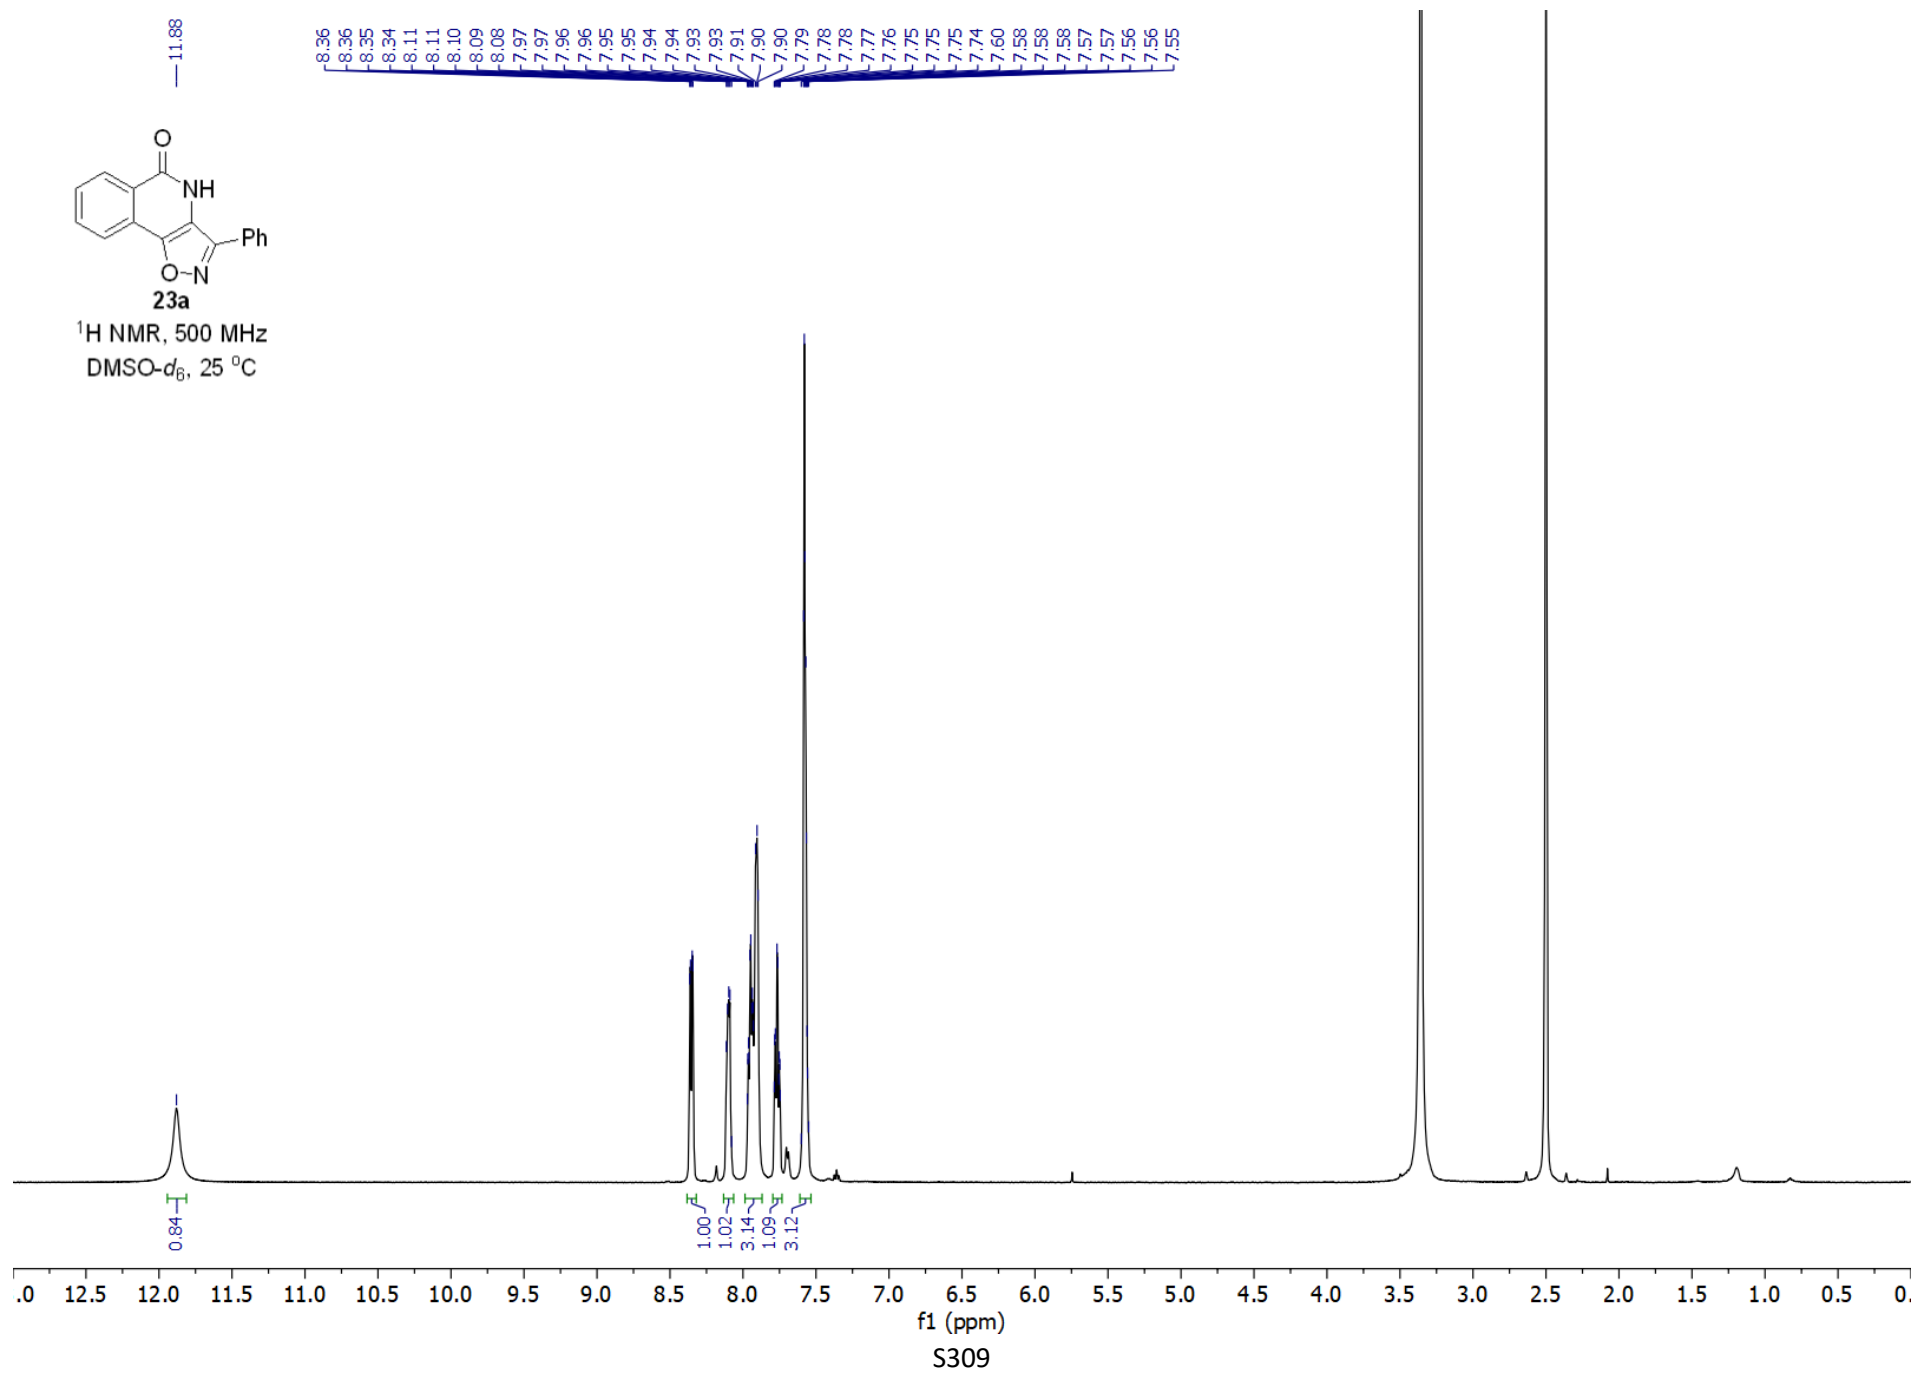

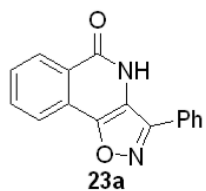

$^{13}\text{C}$  NMR, 125 MHz  
DMSO- $d_6$ , 25 °C

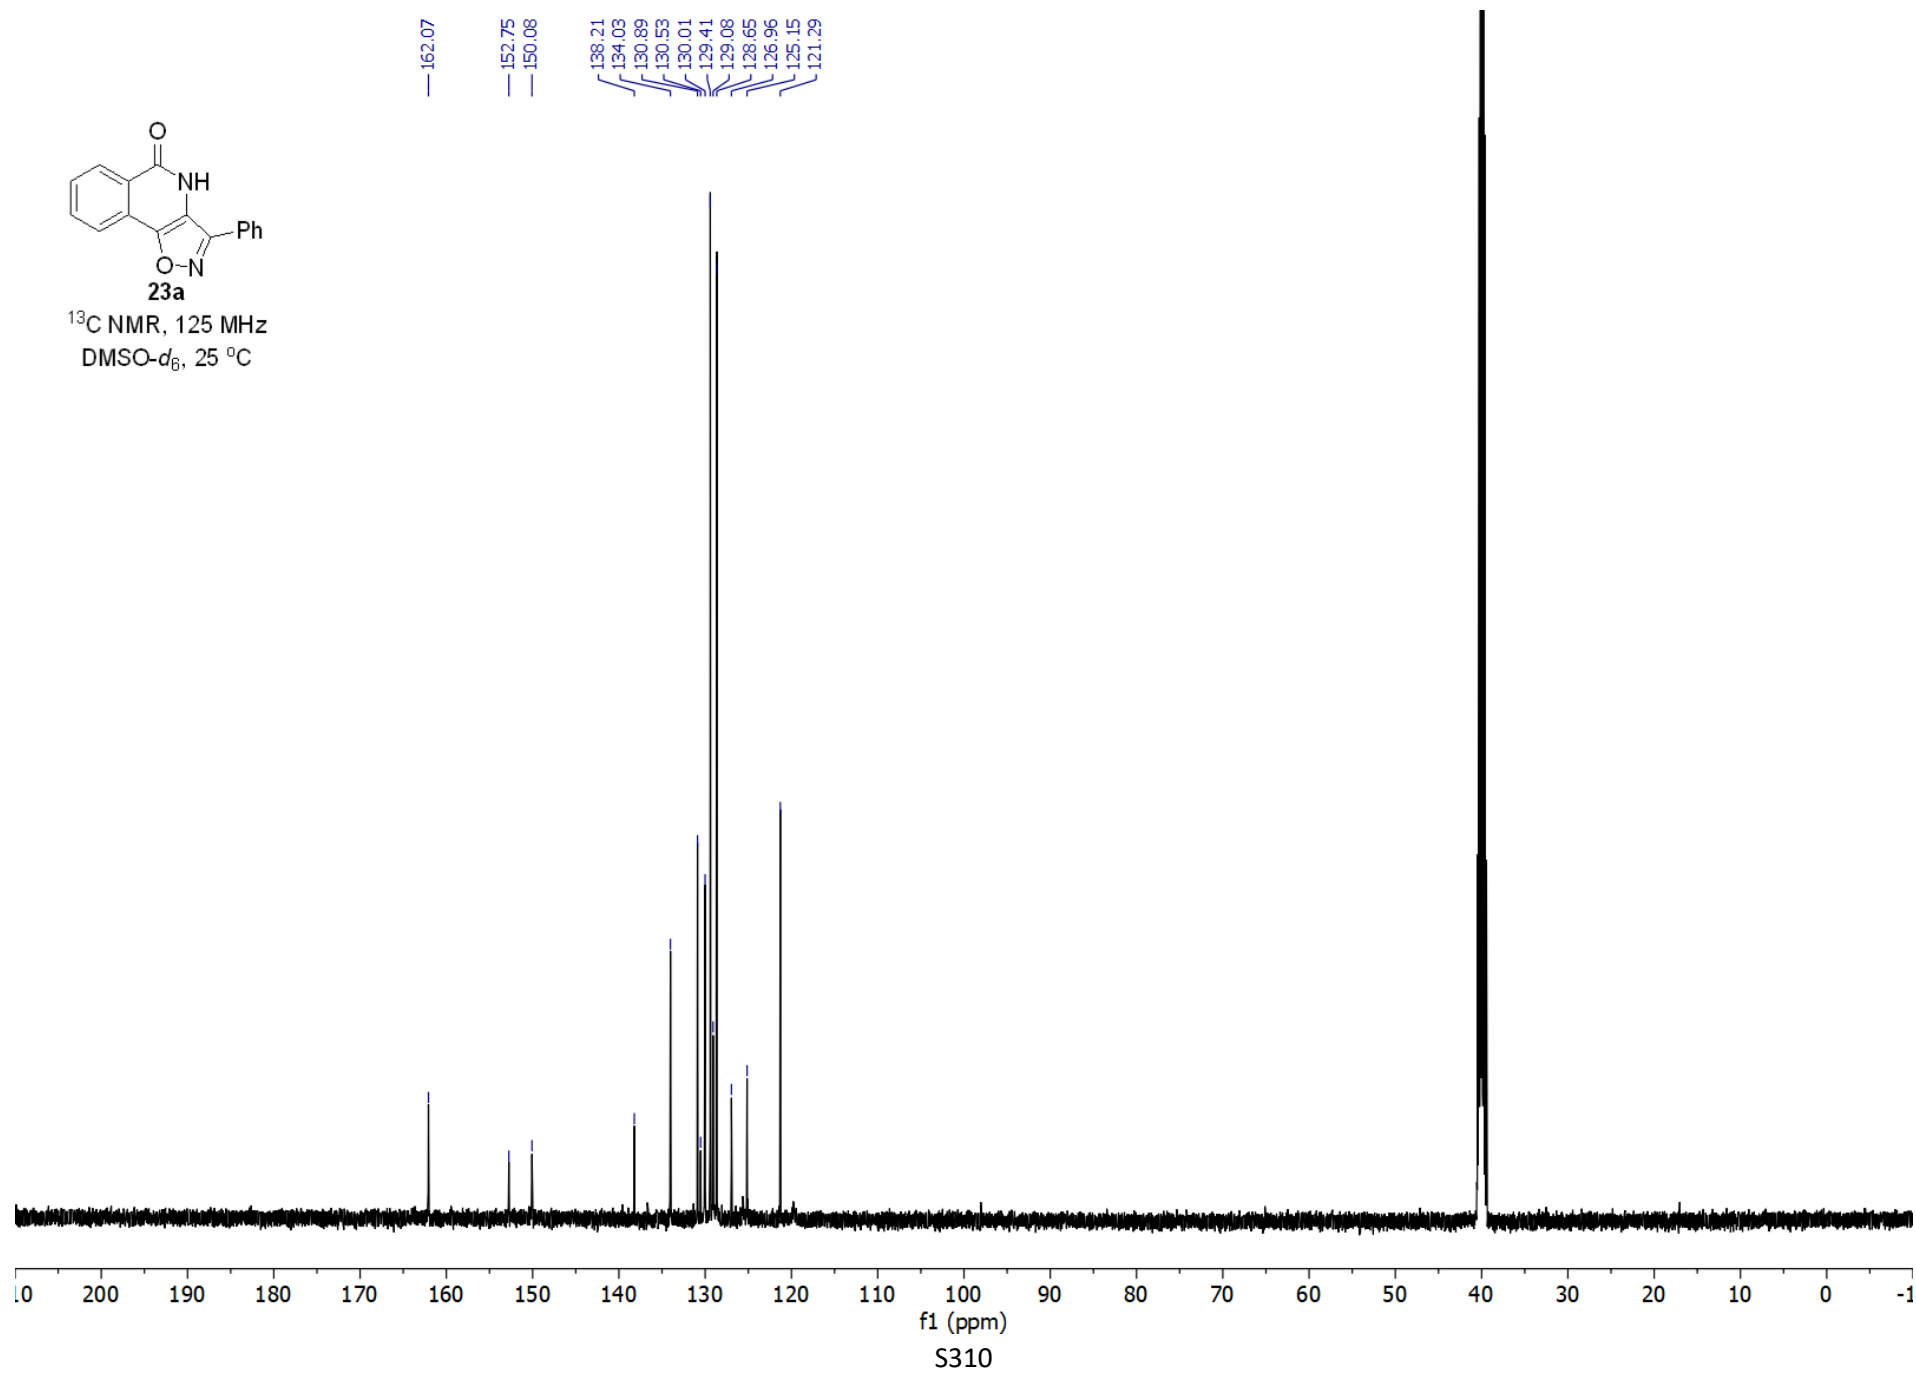

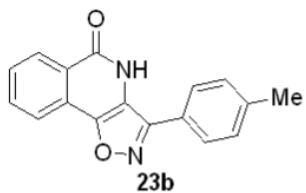

<sup>1</sup>H NMR, 500 MHz  
4% TFA-*d* in CDCl<sub>3</sub>, 25 °C

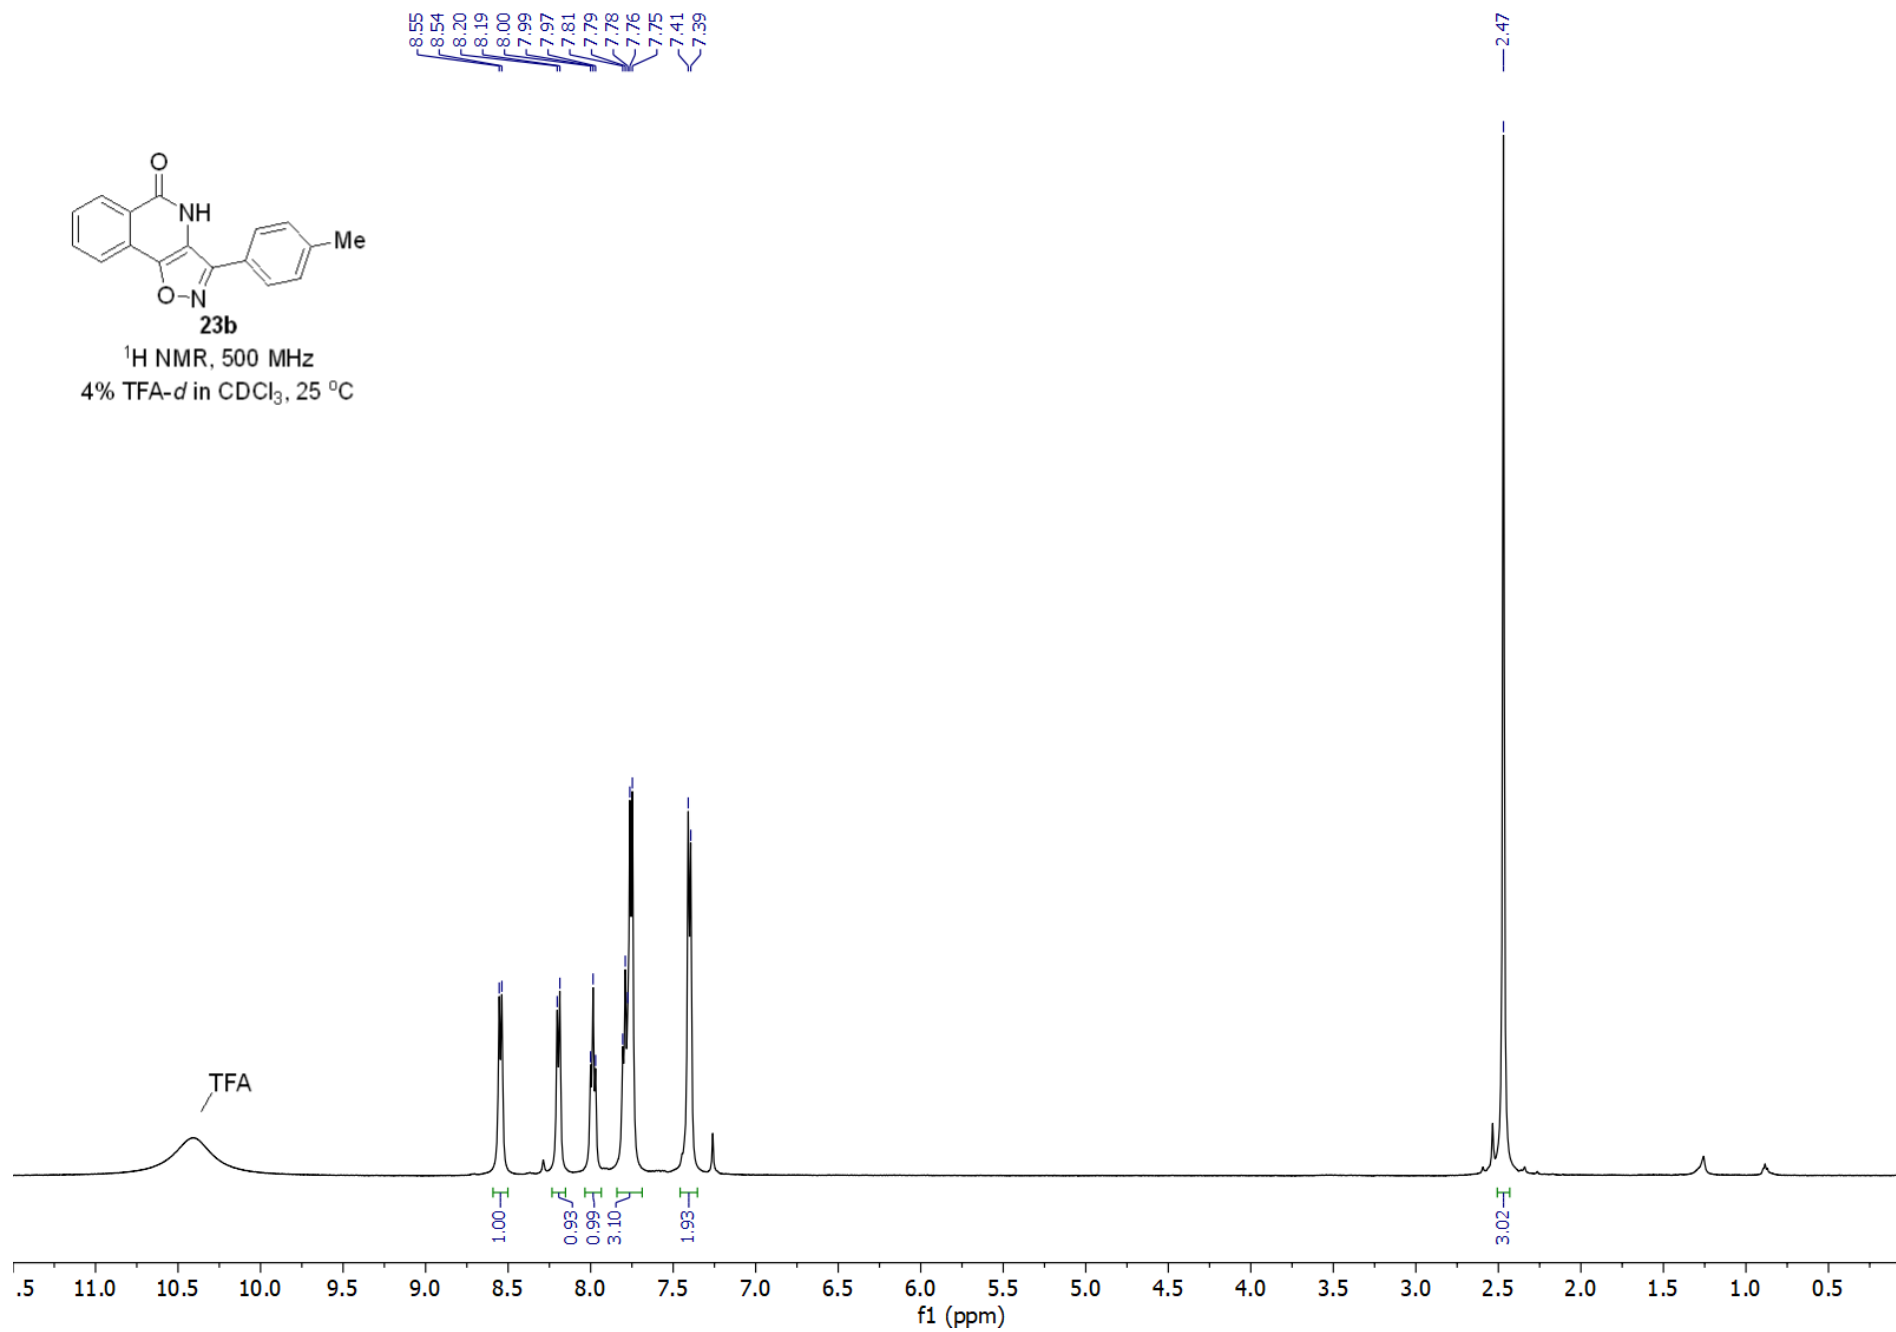

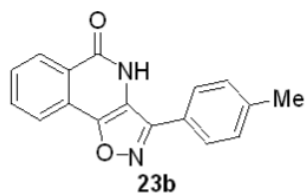

$^{13}\text{C}$  NMR, 125 MHz  
4% TFA-*d* in  $\text{CDCl}_3$ , 25 °C

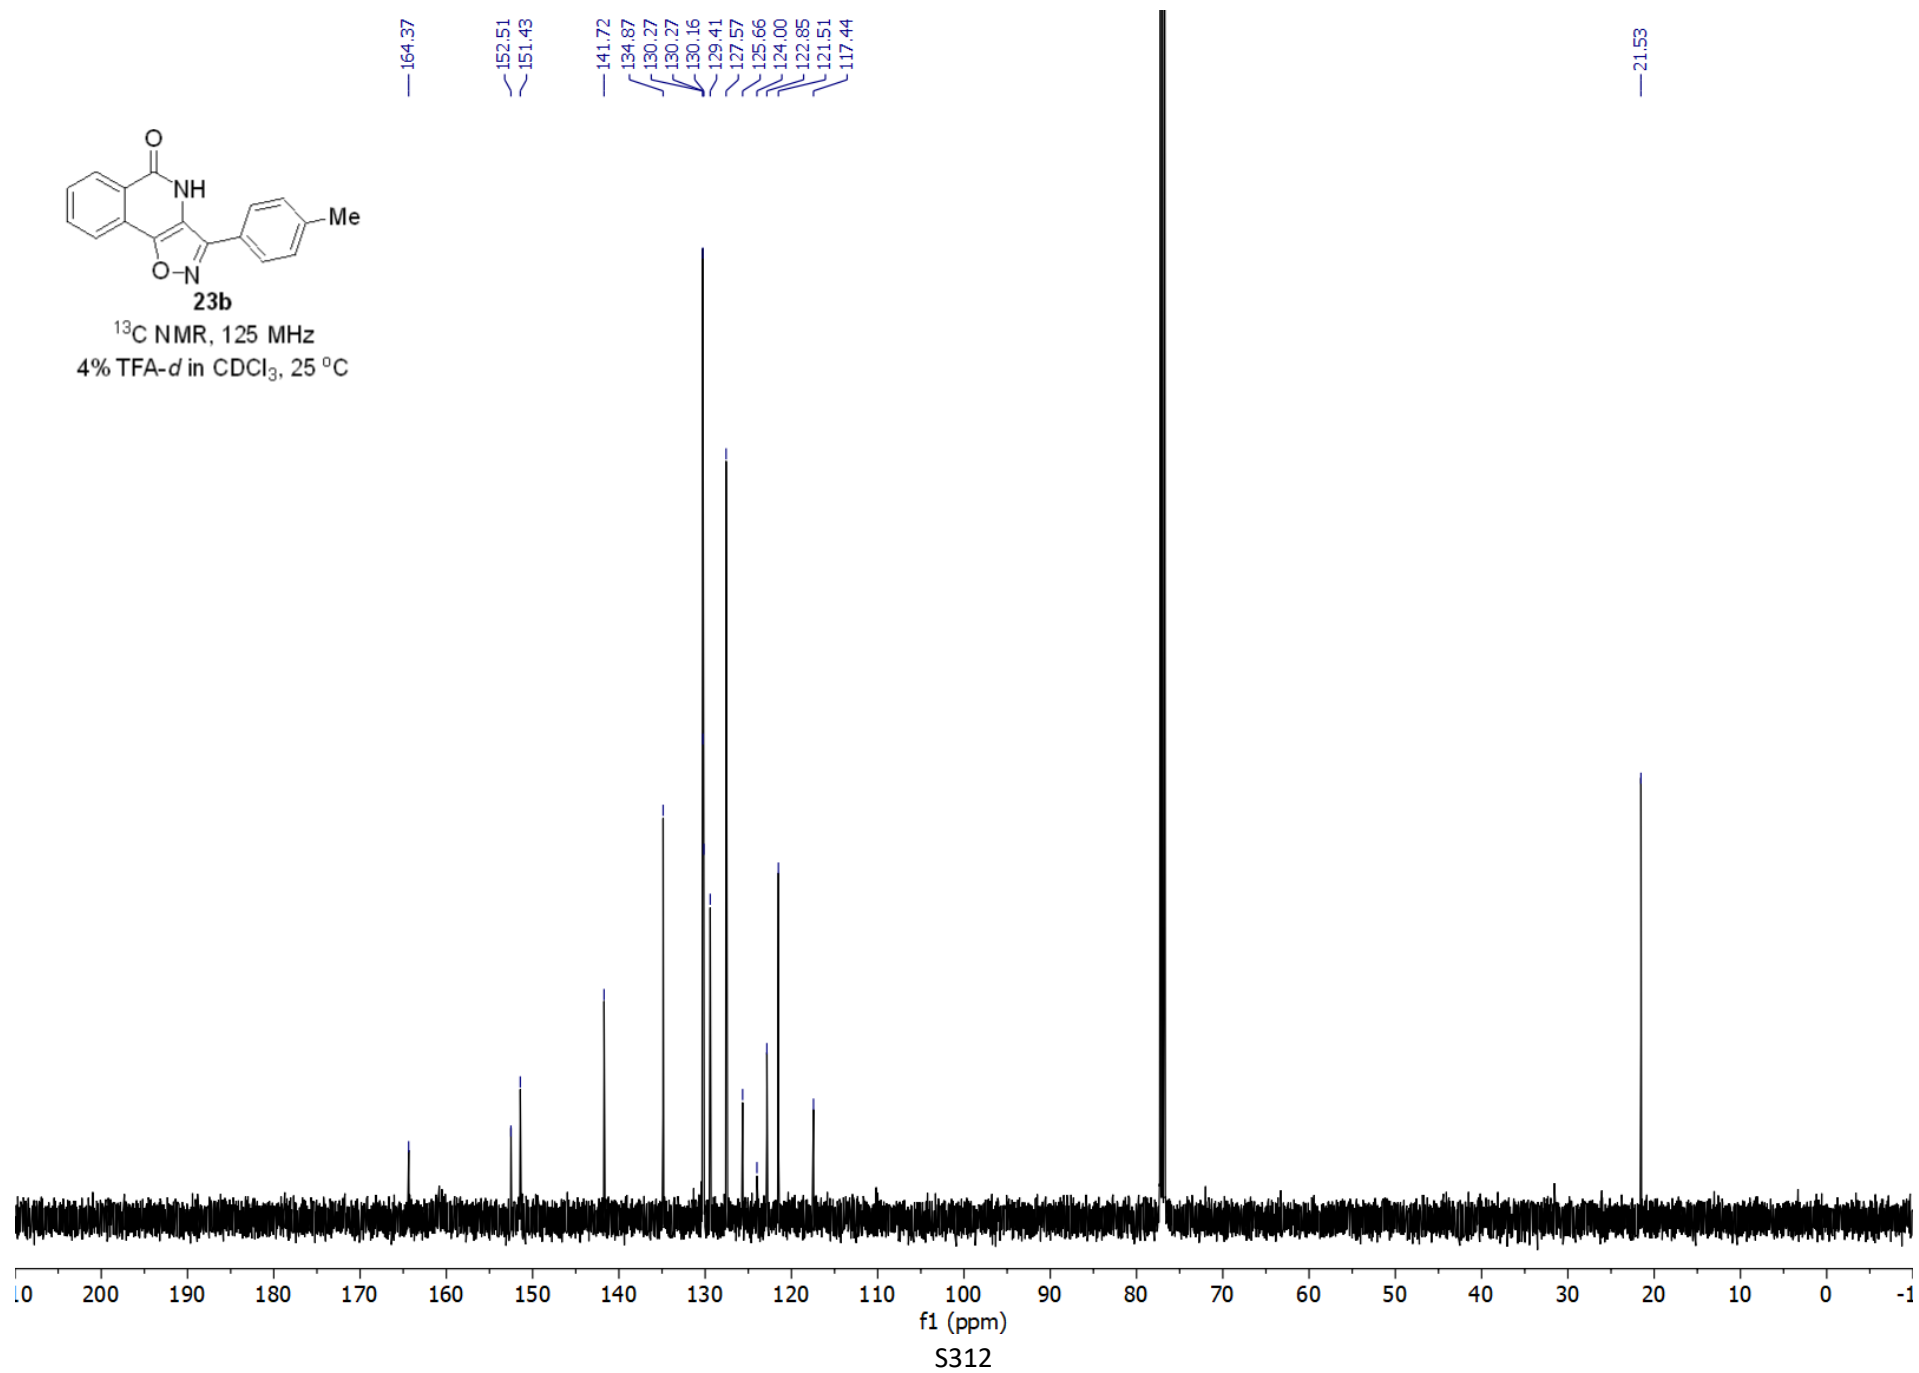

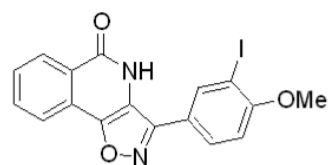

**23c**

<sup>1</sup>H NMR, 500 MHz  
4% TFA-*d* in CDCl<sub>3</sub>, 25 °C

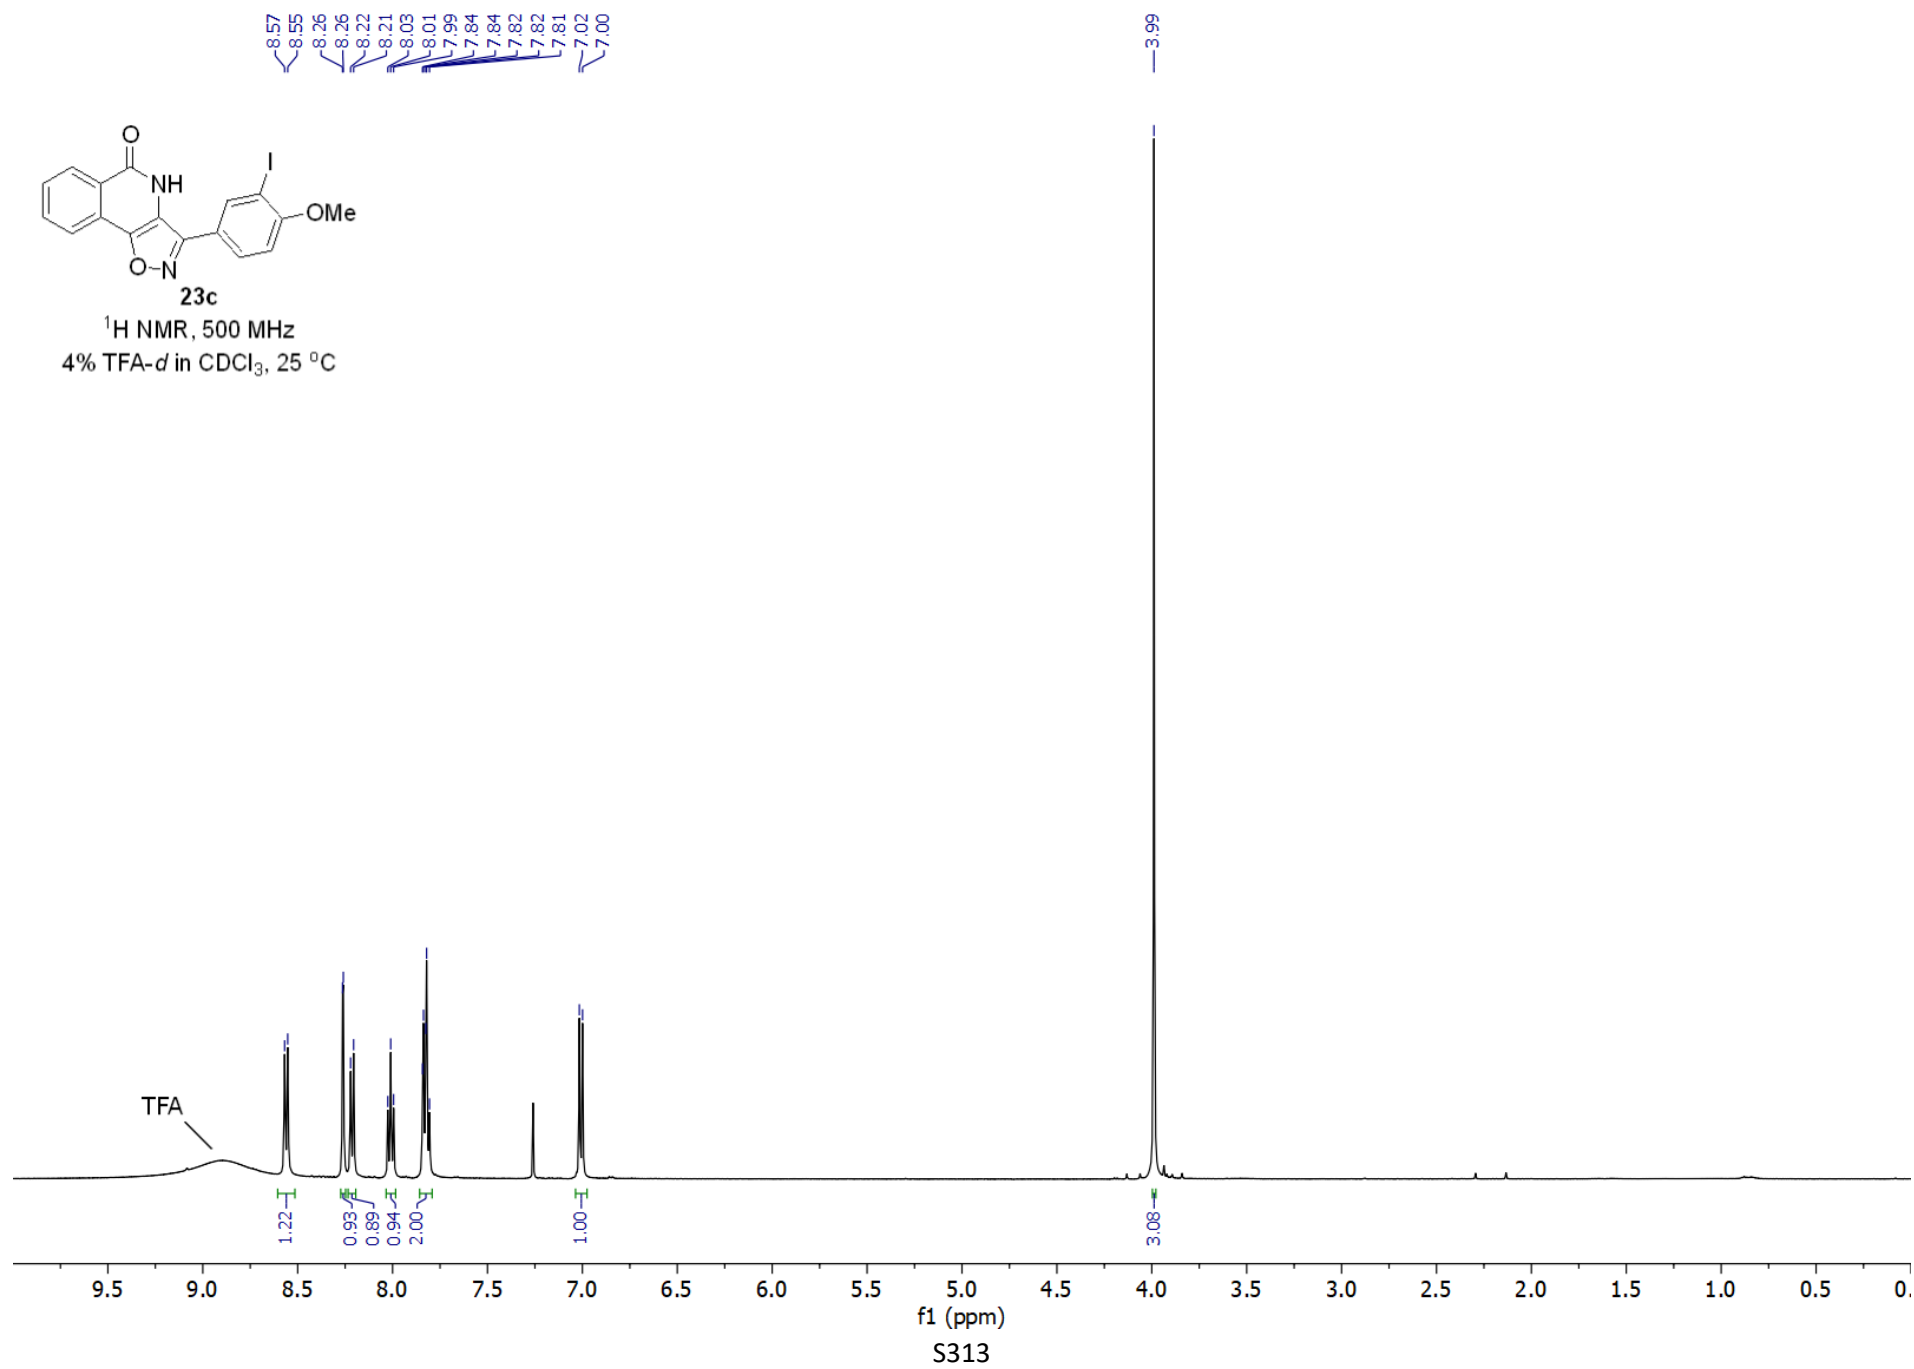

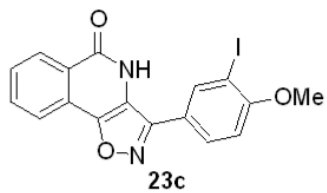

$^{13}\text{C}$  NMR, 125 MHz  
4% TFA-*d* in  $\text{CDCl}_3$ , 25 °C

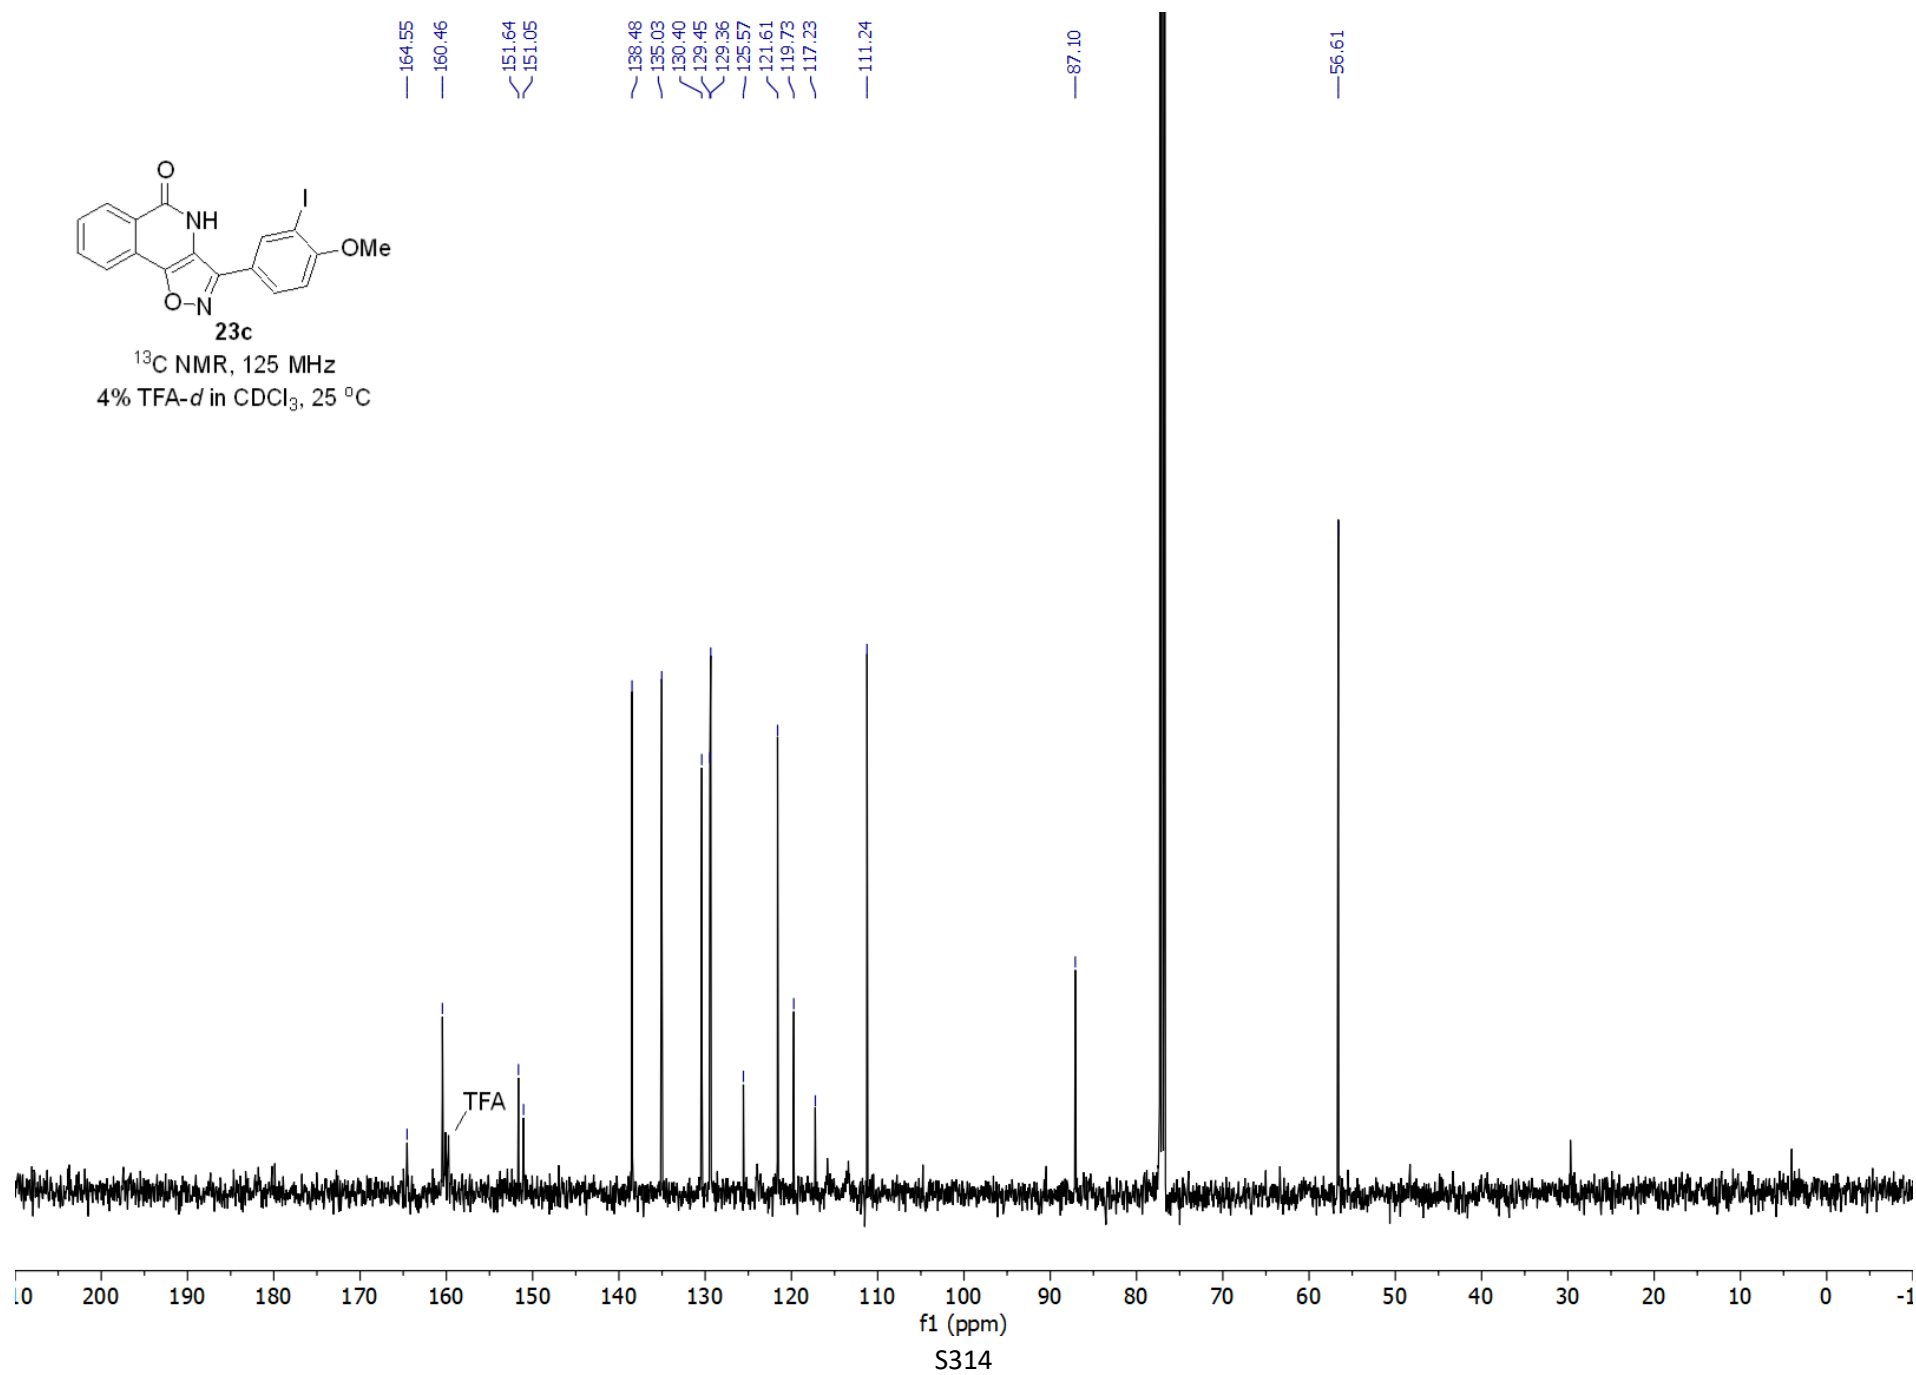

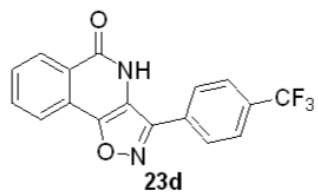

<sup>1</sup>H NMR, 500 MHz  
4% TFA-*d* in CDCl<sub>3</sub>, 25 °C

8.58  
8.56  
8.25  
8.23  
8.05  
8.05  
8.03  
8.03  
8.02  
8.01  
7.88  
7.87  
7.86  
7.85  
7.83  
7.83

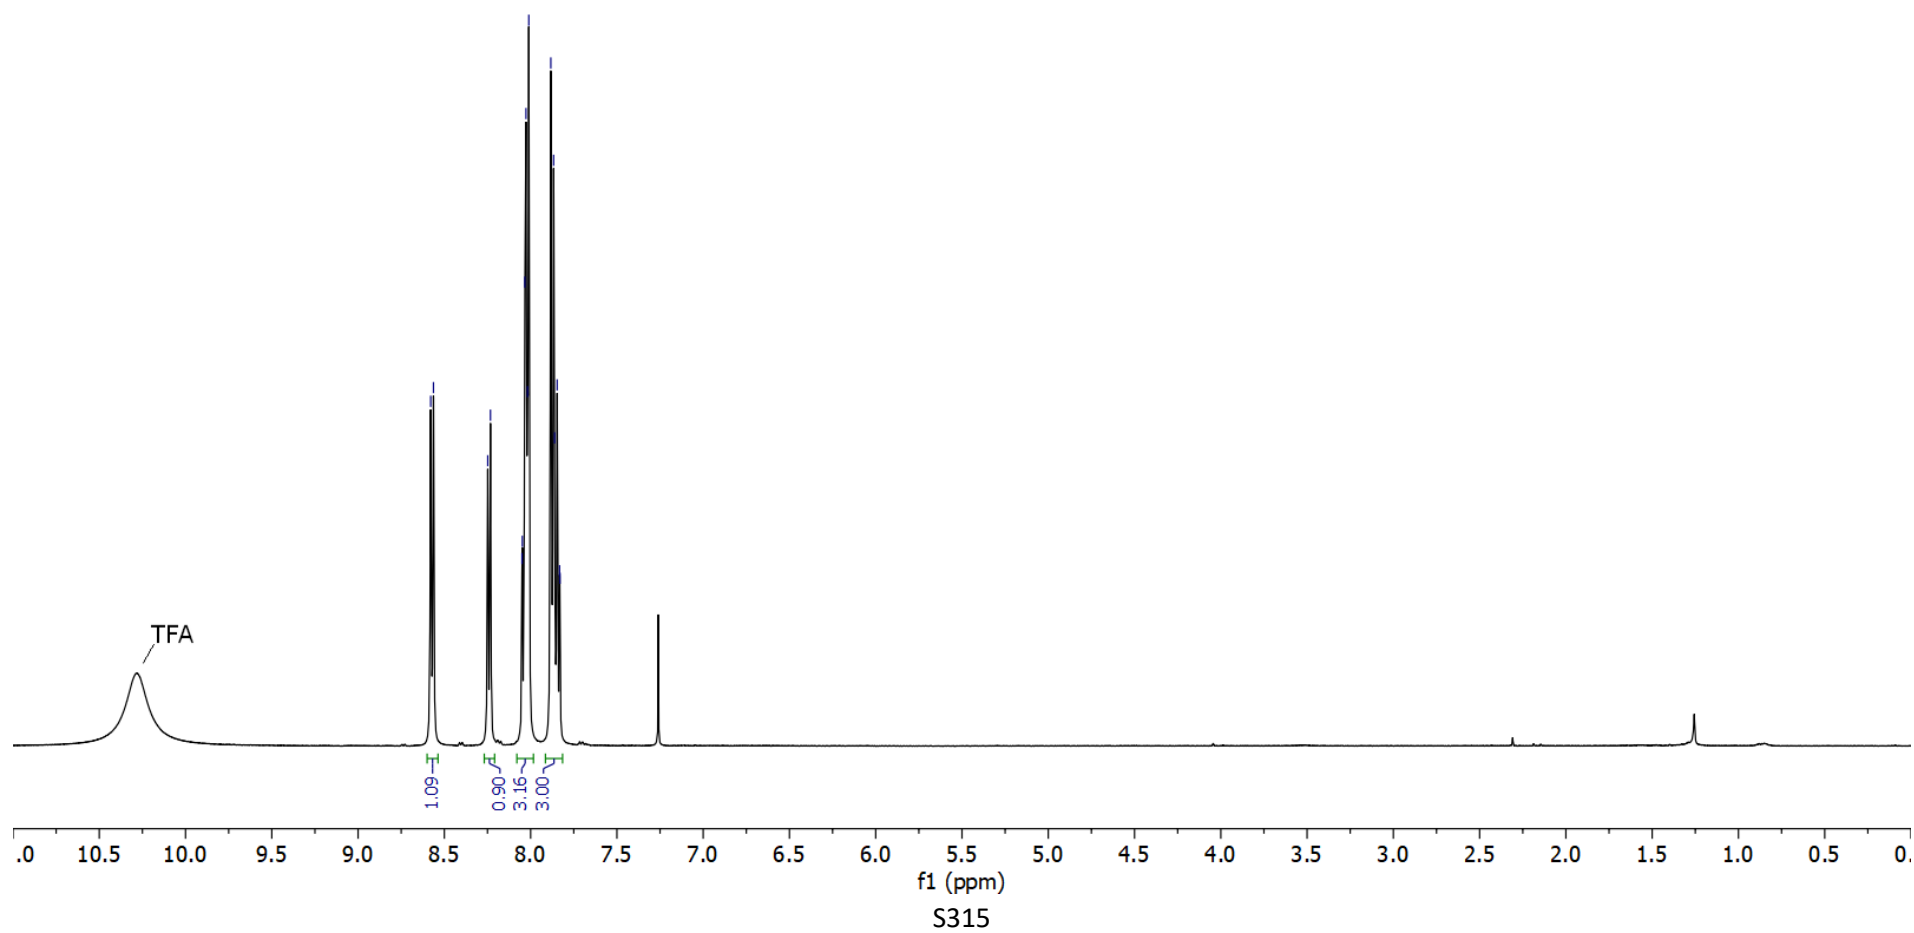

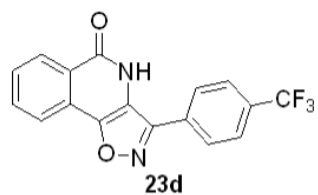

$^{13}\text{C}$  NMR, 125 MHz  
4% TFA-*d* in  $\text{CDCl}_3$ , 25 °C

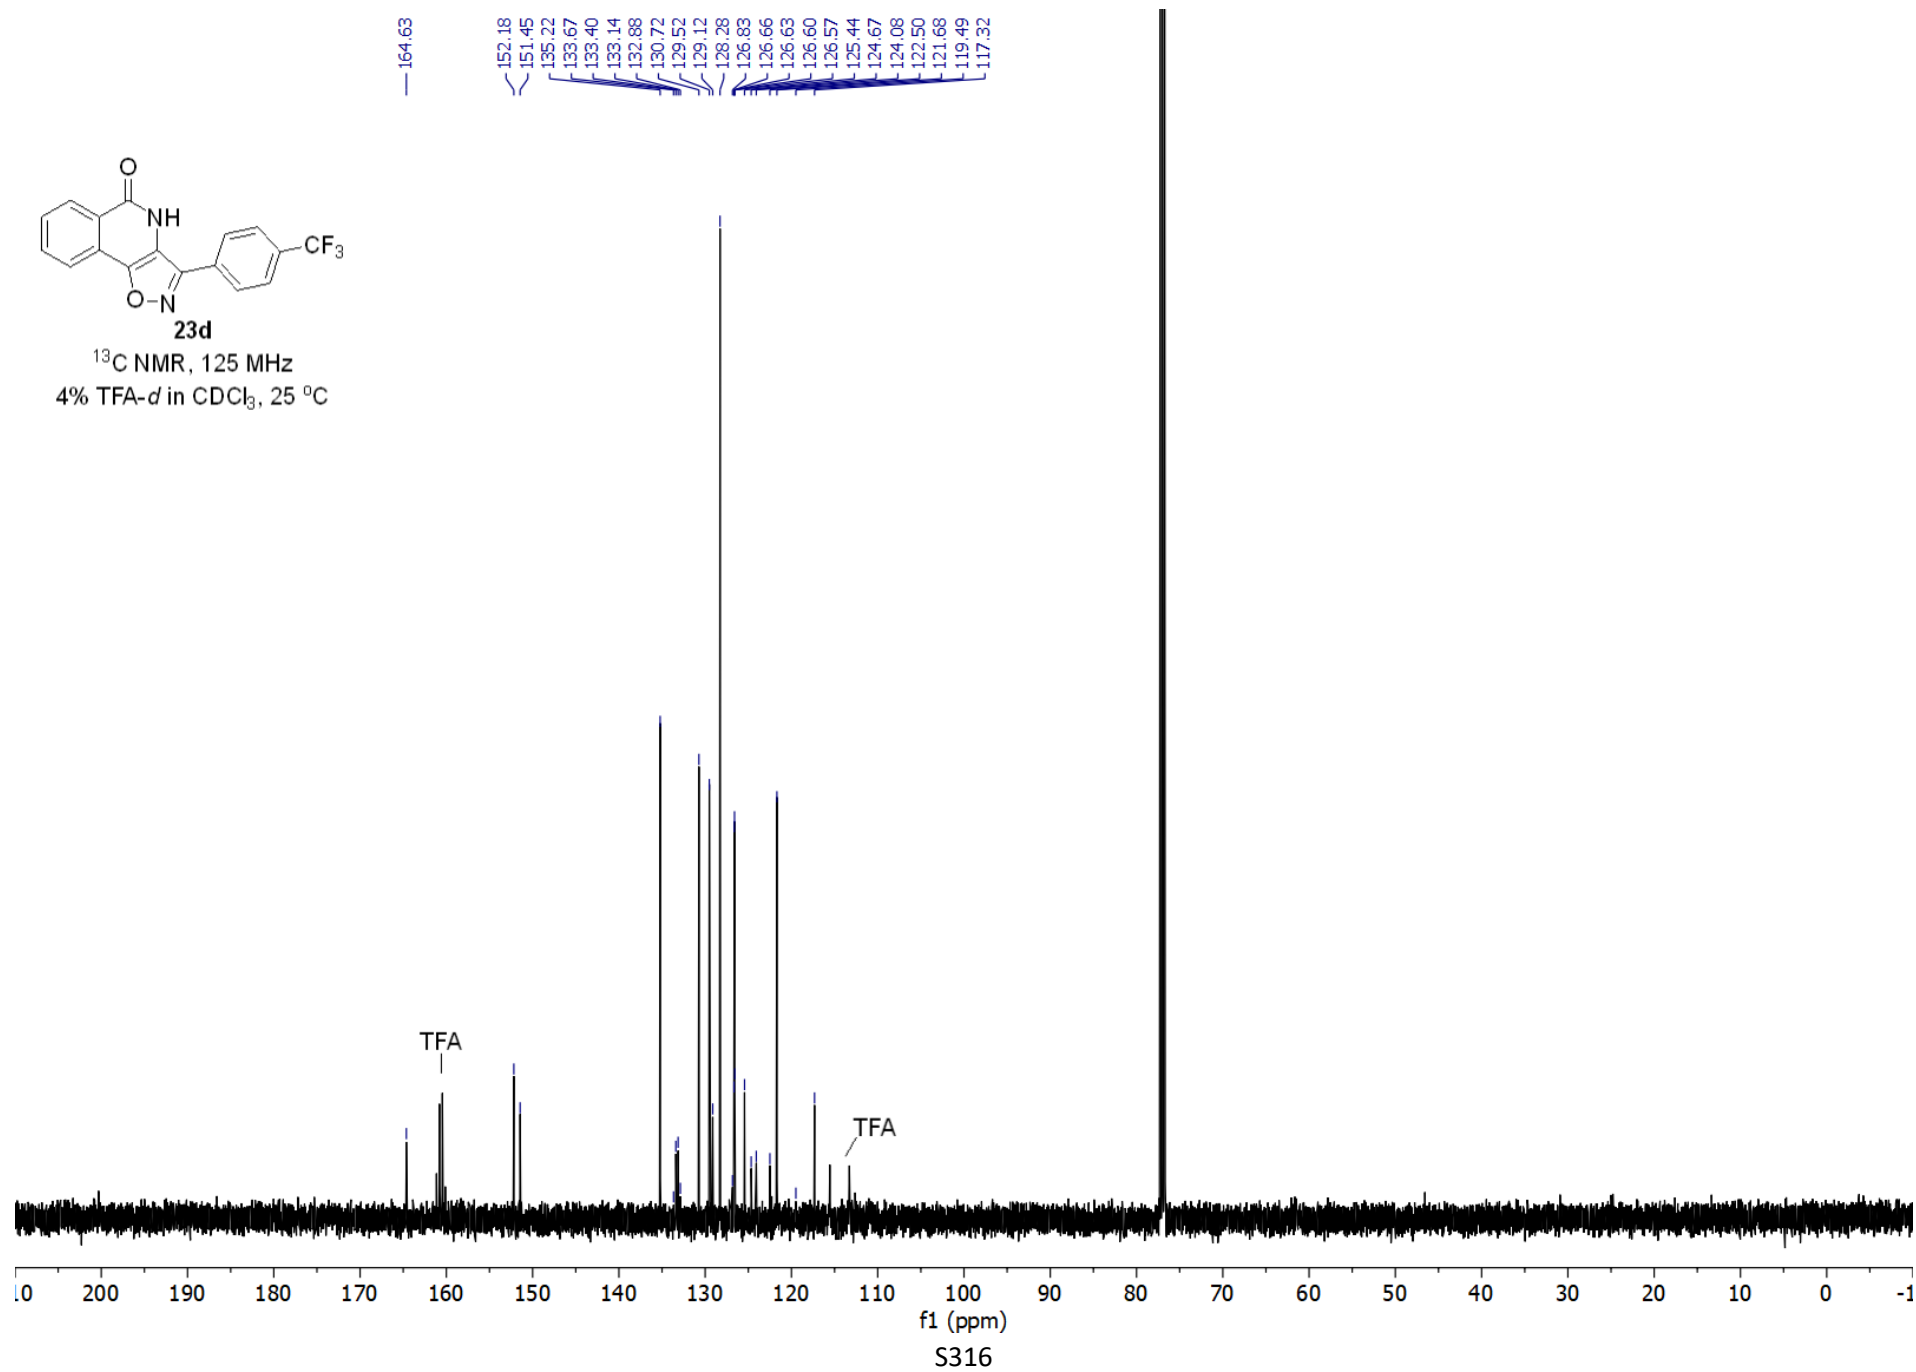

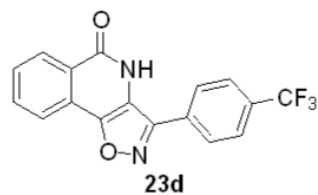

$^{19}\text{F}$  NMR, 470 MHz  
4% TFA-*d* in  $\text{CDCl}_3$ , 25 °C

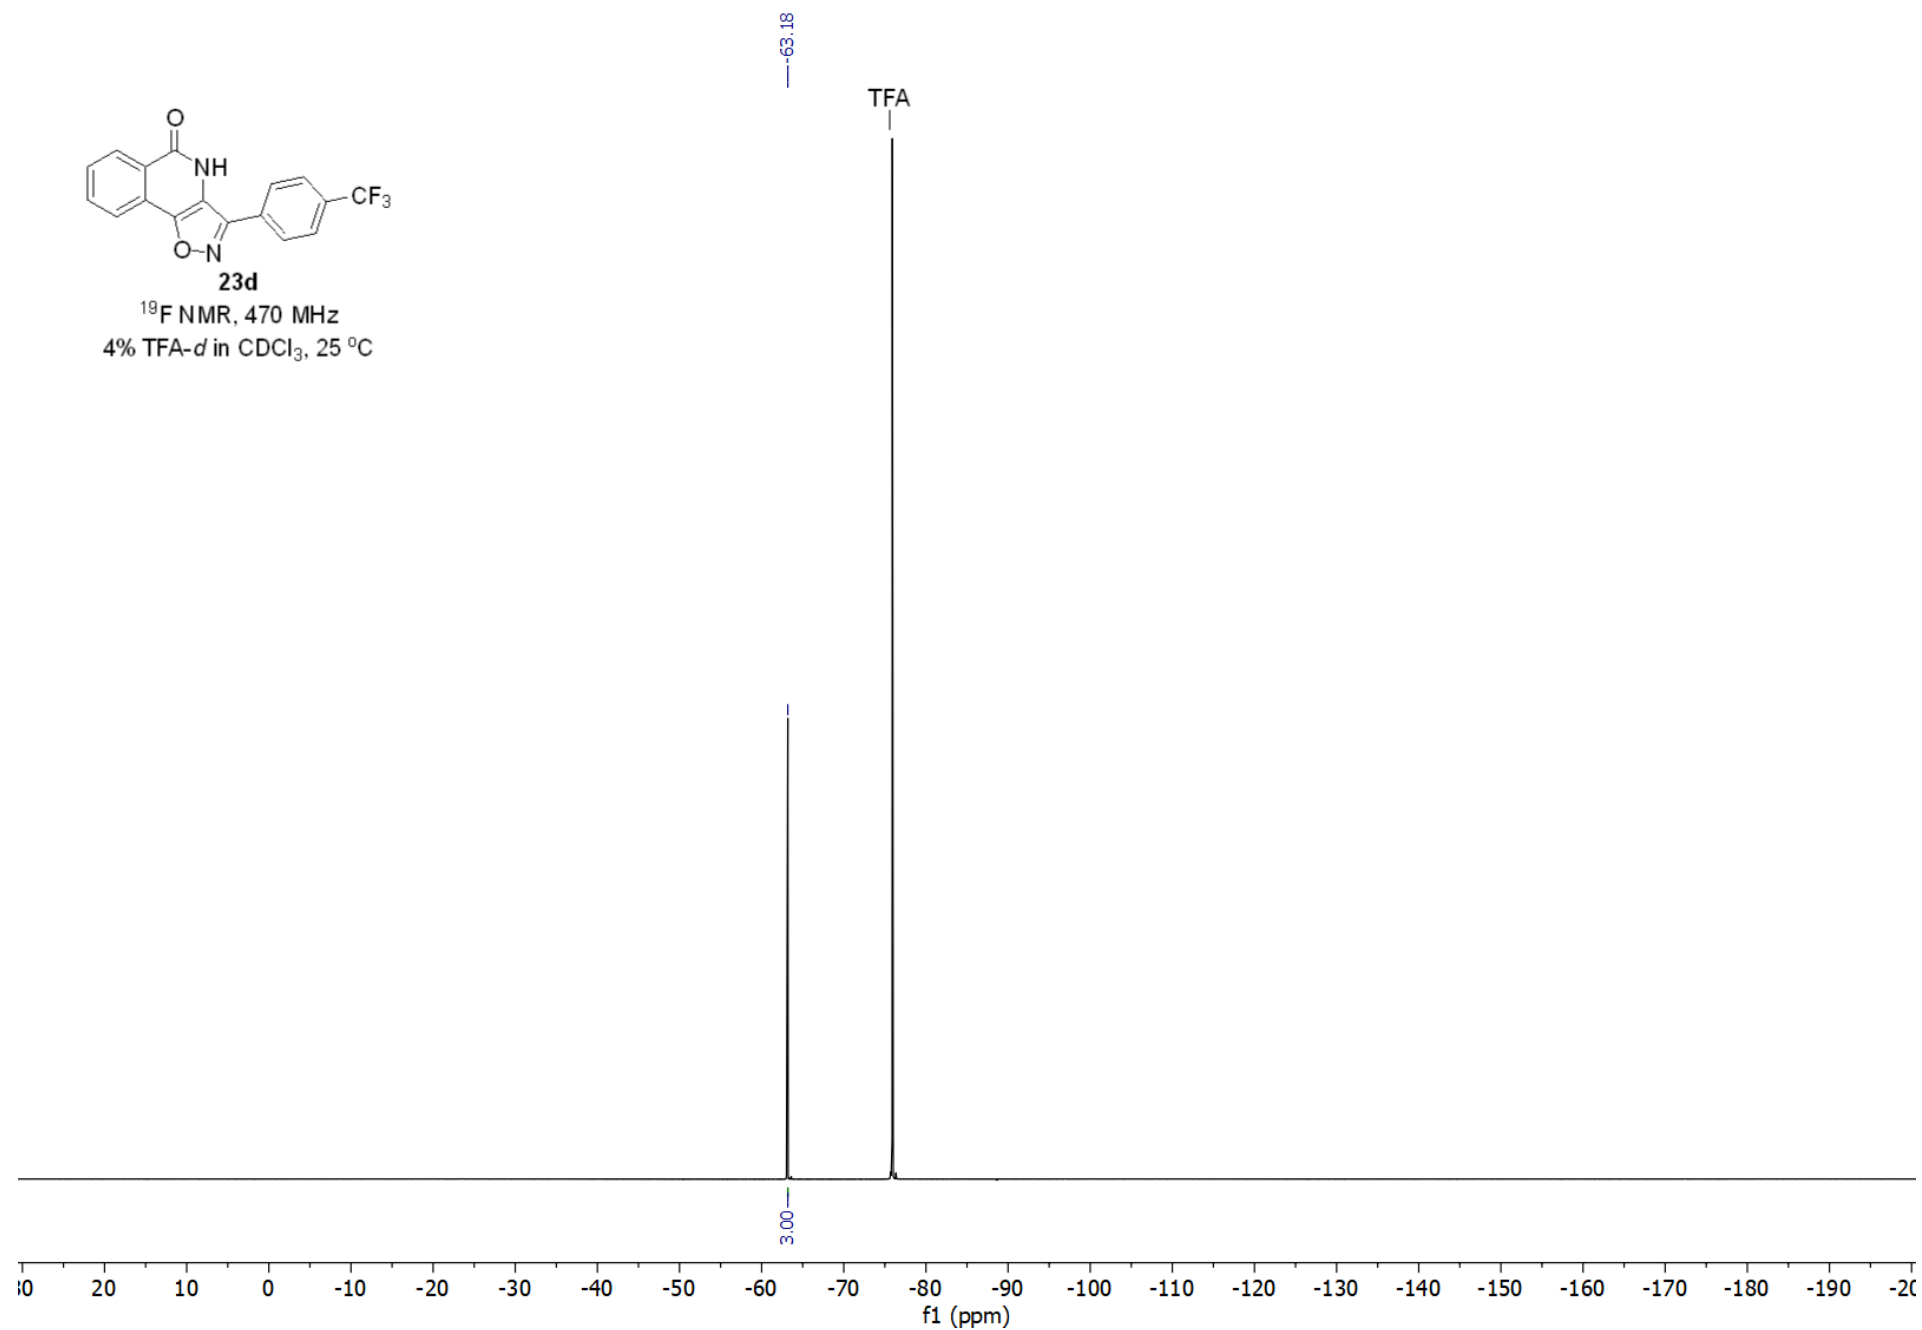

S317

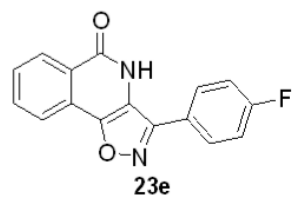

<sup>1</sup>H NMR, 500 MHz  
4% TFA-*d* in CDCl<sub>3</sub>, 25 °C

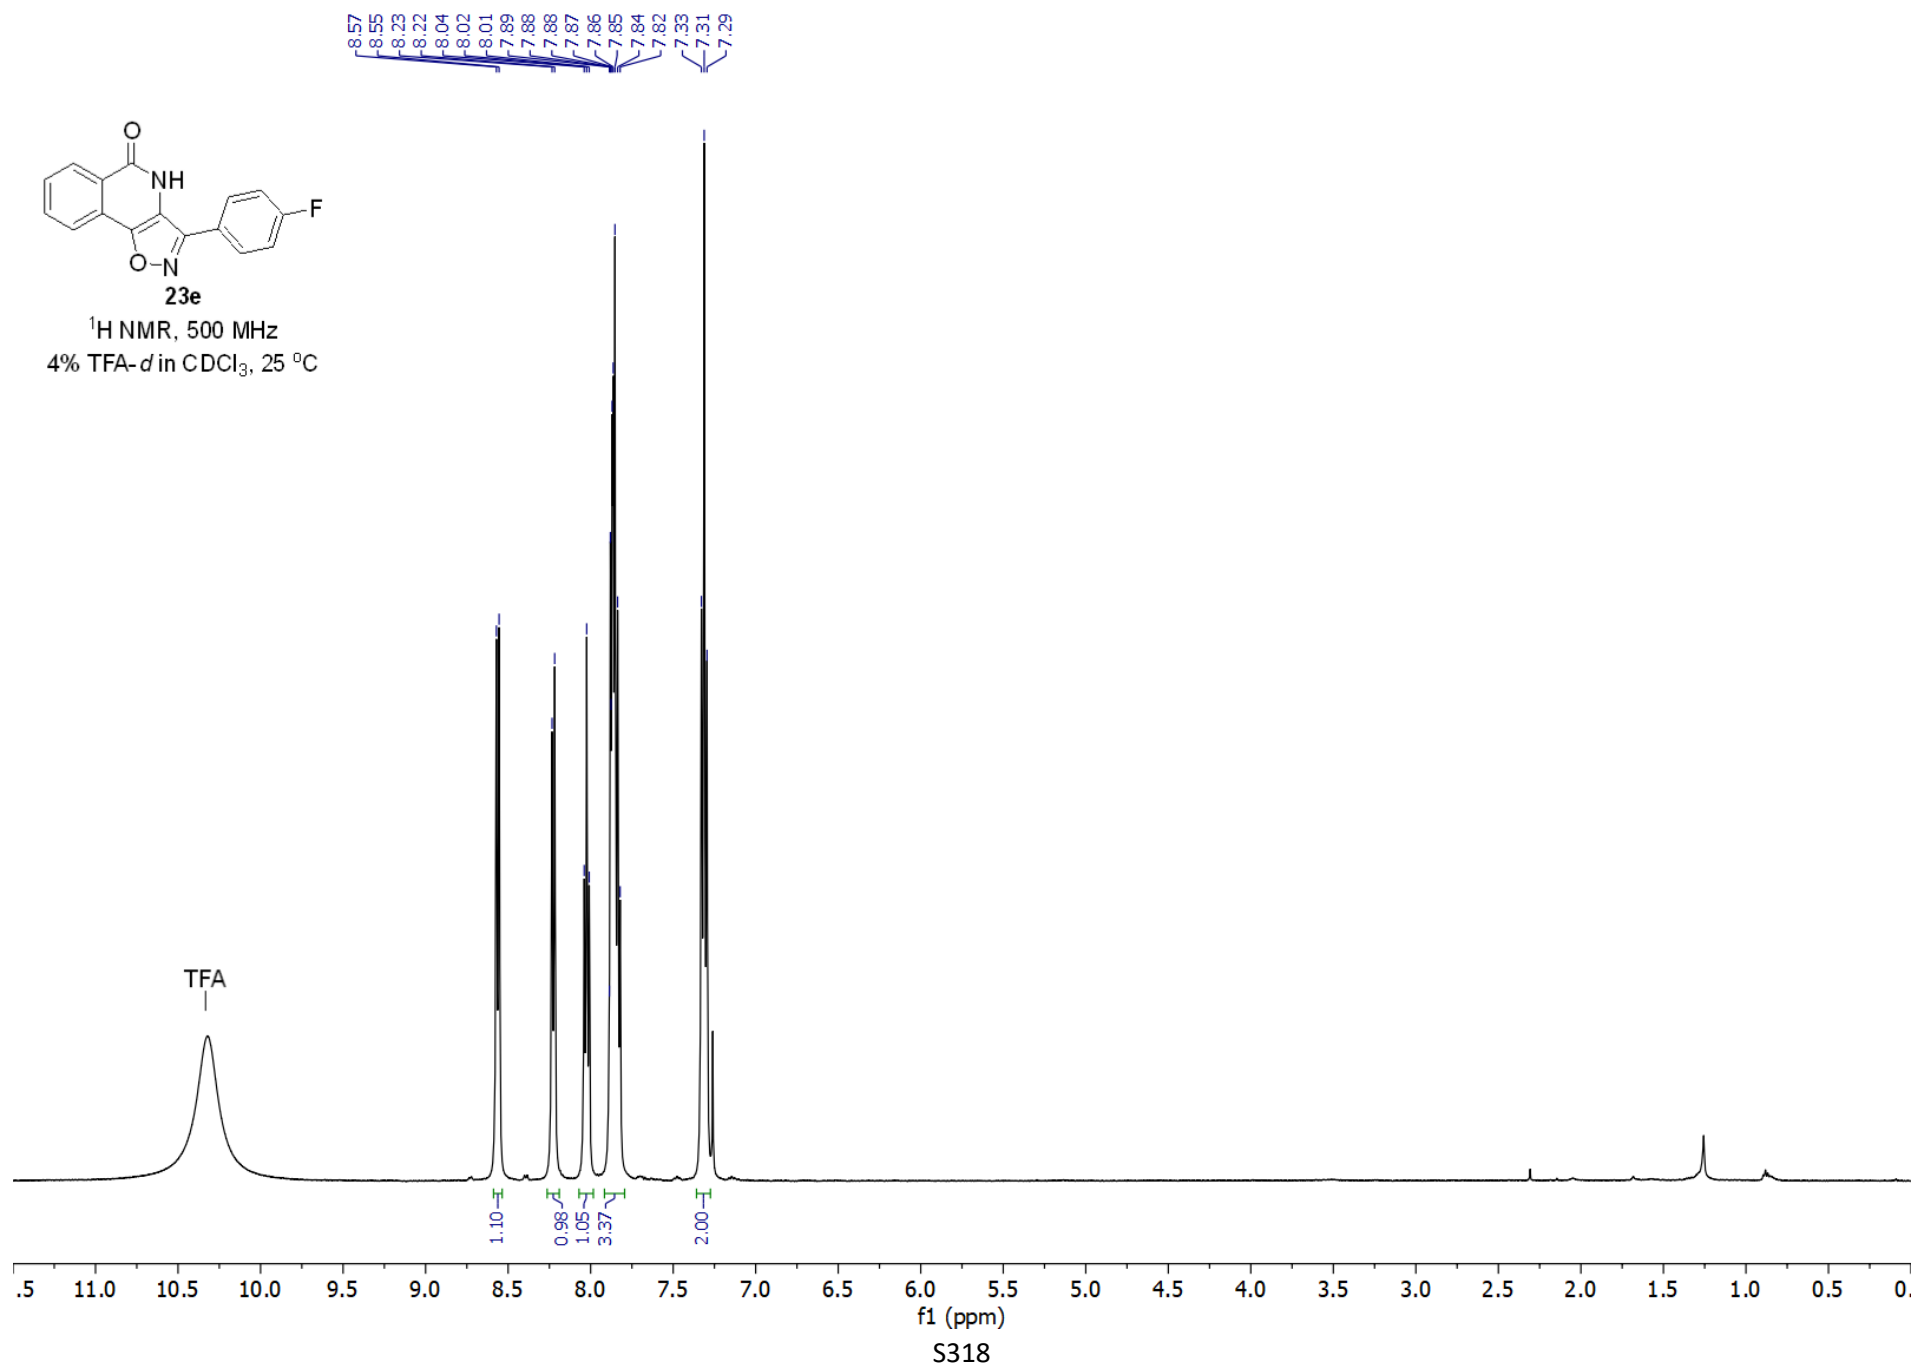

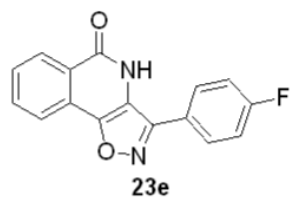

$^{13}\text{C}$  NMR, 125 MHz  
4% TFA-*d* in  $\text{CDCl}_3$ , 25 °C

165.66  
164.60  
163.65  
151.82  
151.77  
135.17  
130.65  
130.06  
129.99  
129.48  
125.46  
124.06  
121.69  
121.55  
121.52  
117.28  
117.13  
116.95

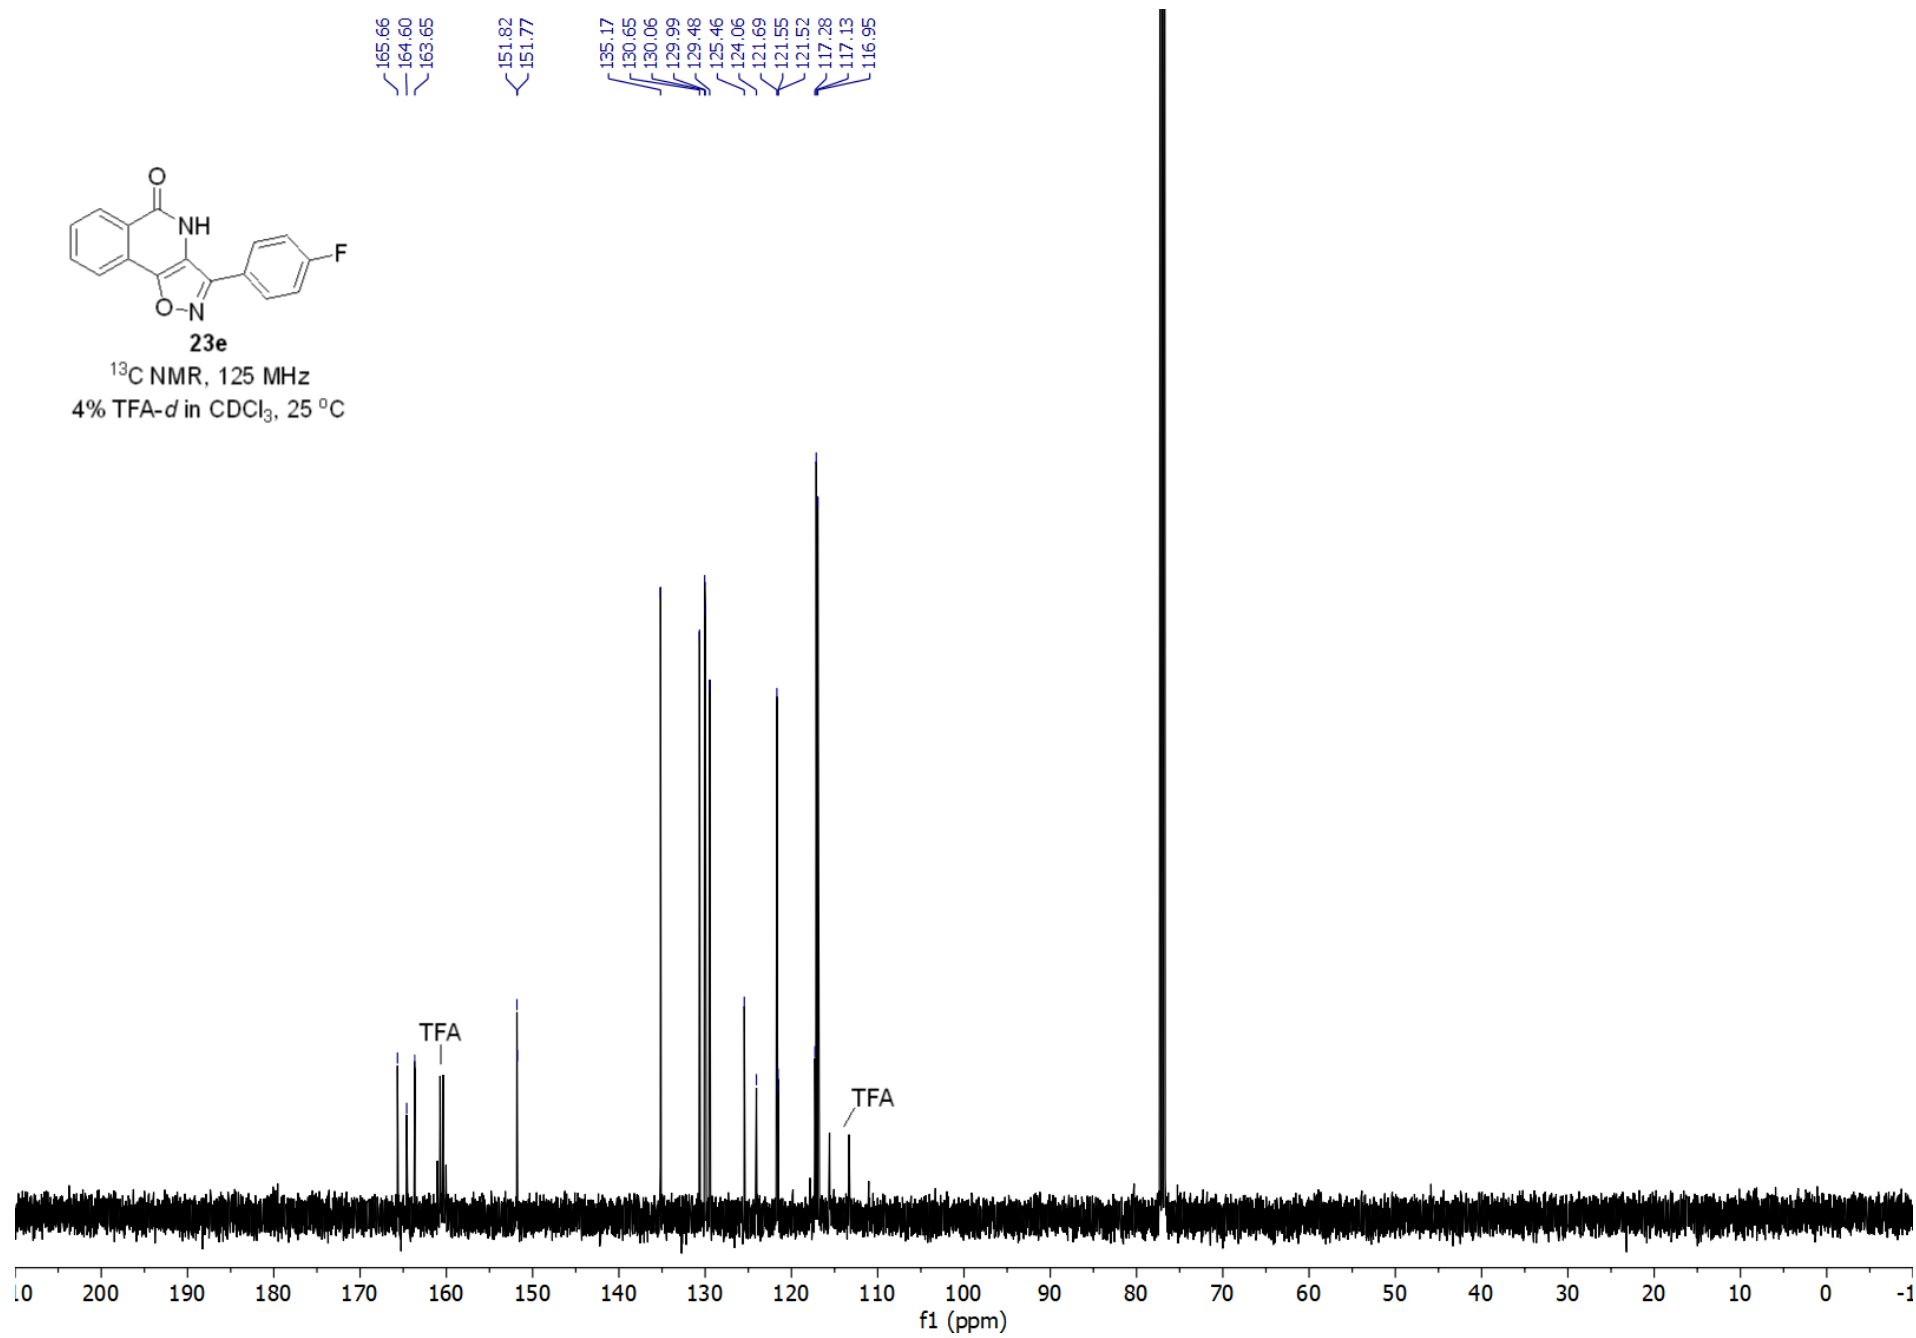

S319

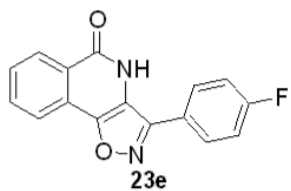

$^{19}\text{F}$  NMR, 470 MHz  
4% TFA-*d* in  $\text{CDCl}_3$ , 25 °C

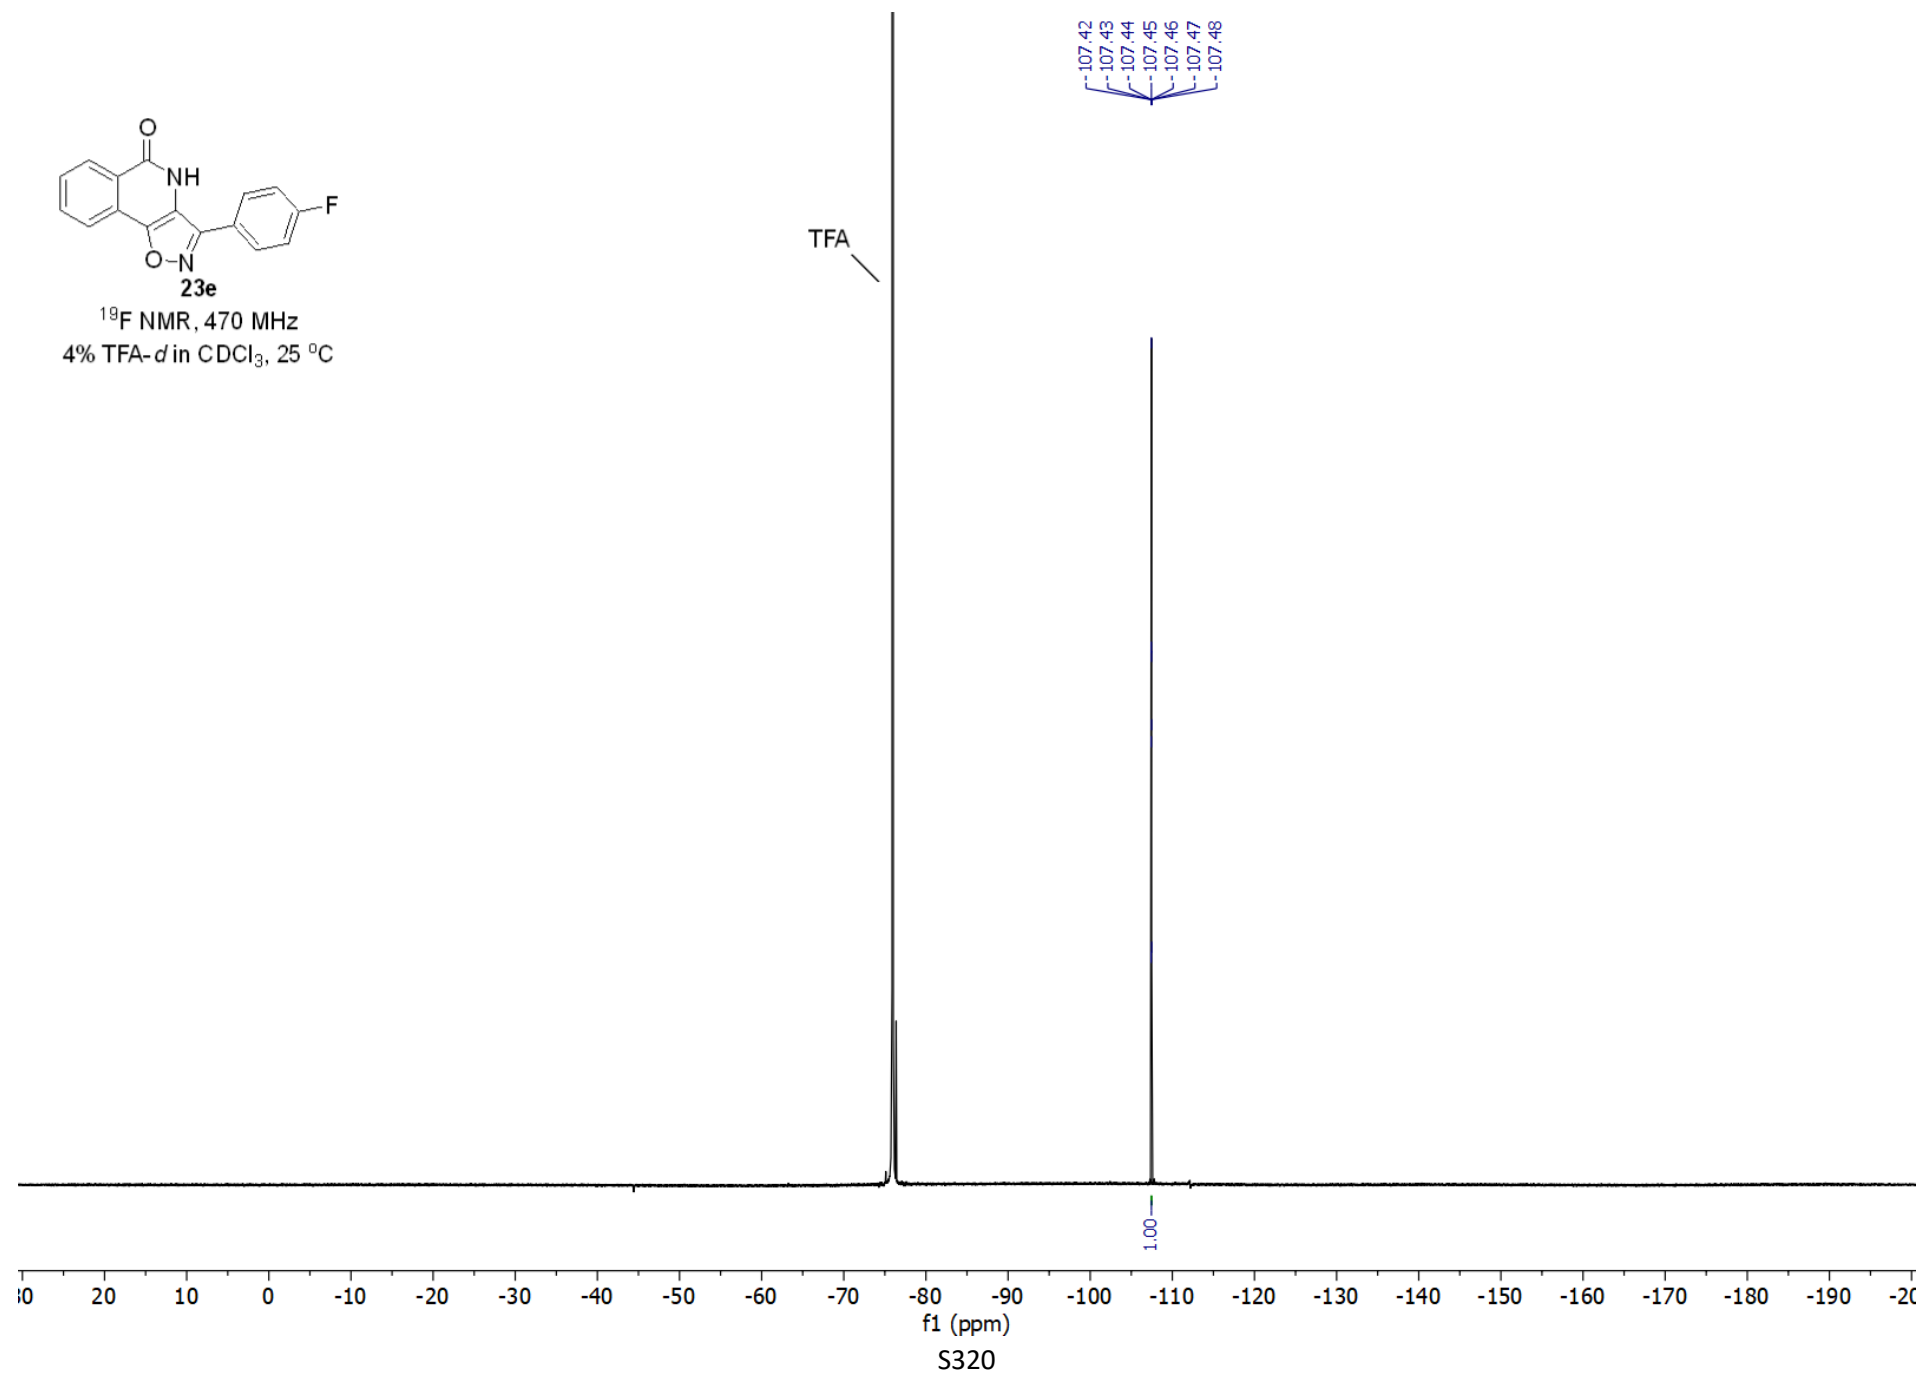

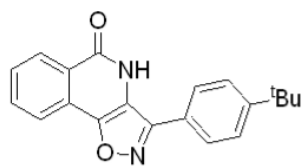

**23f**

$^1\text{H}$  NMR, 500 MHz  
4% TFA-*d* in  $\text{CDCl}_3$ , 25 °C

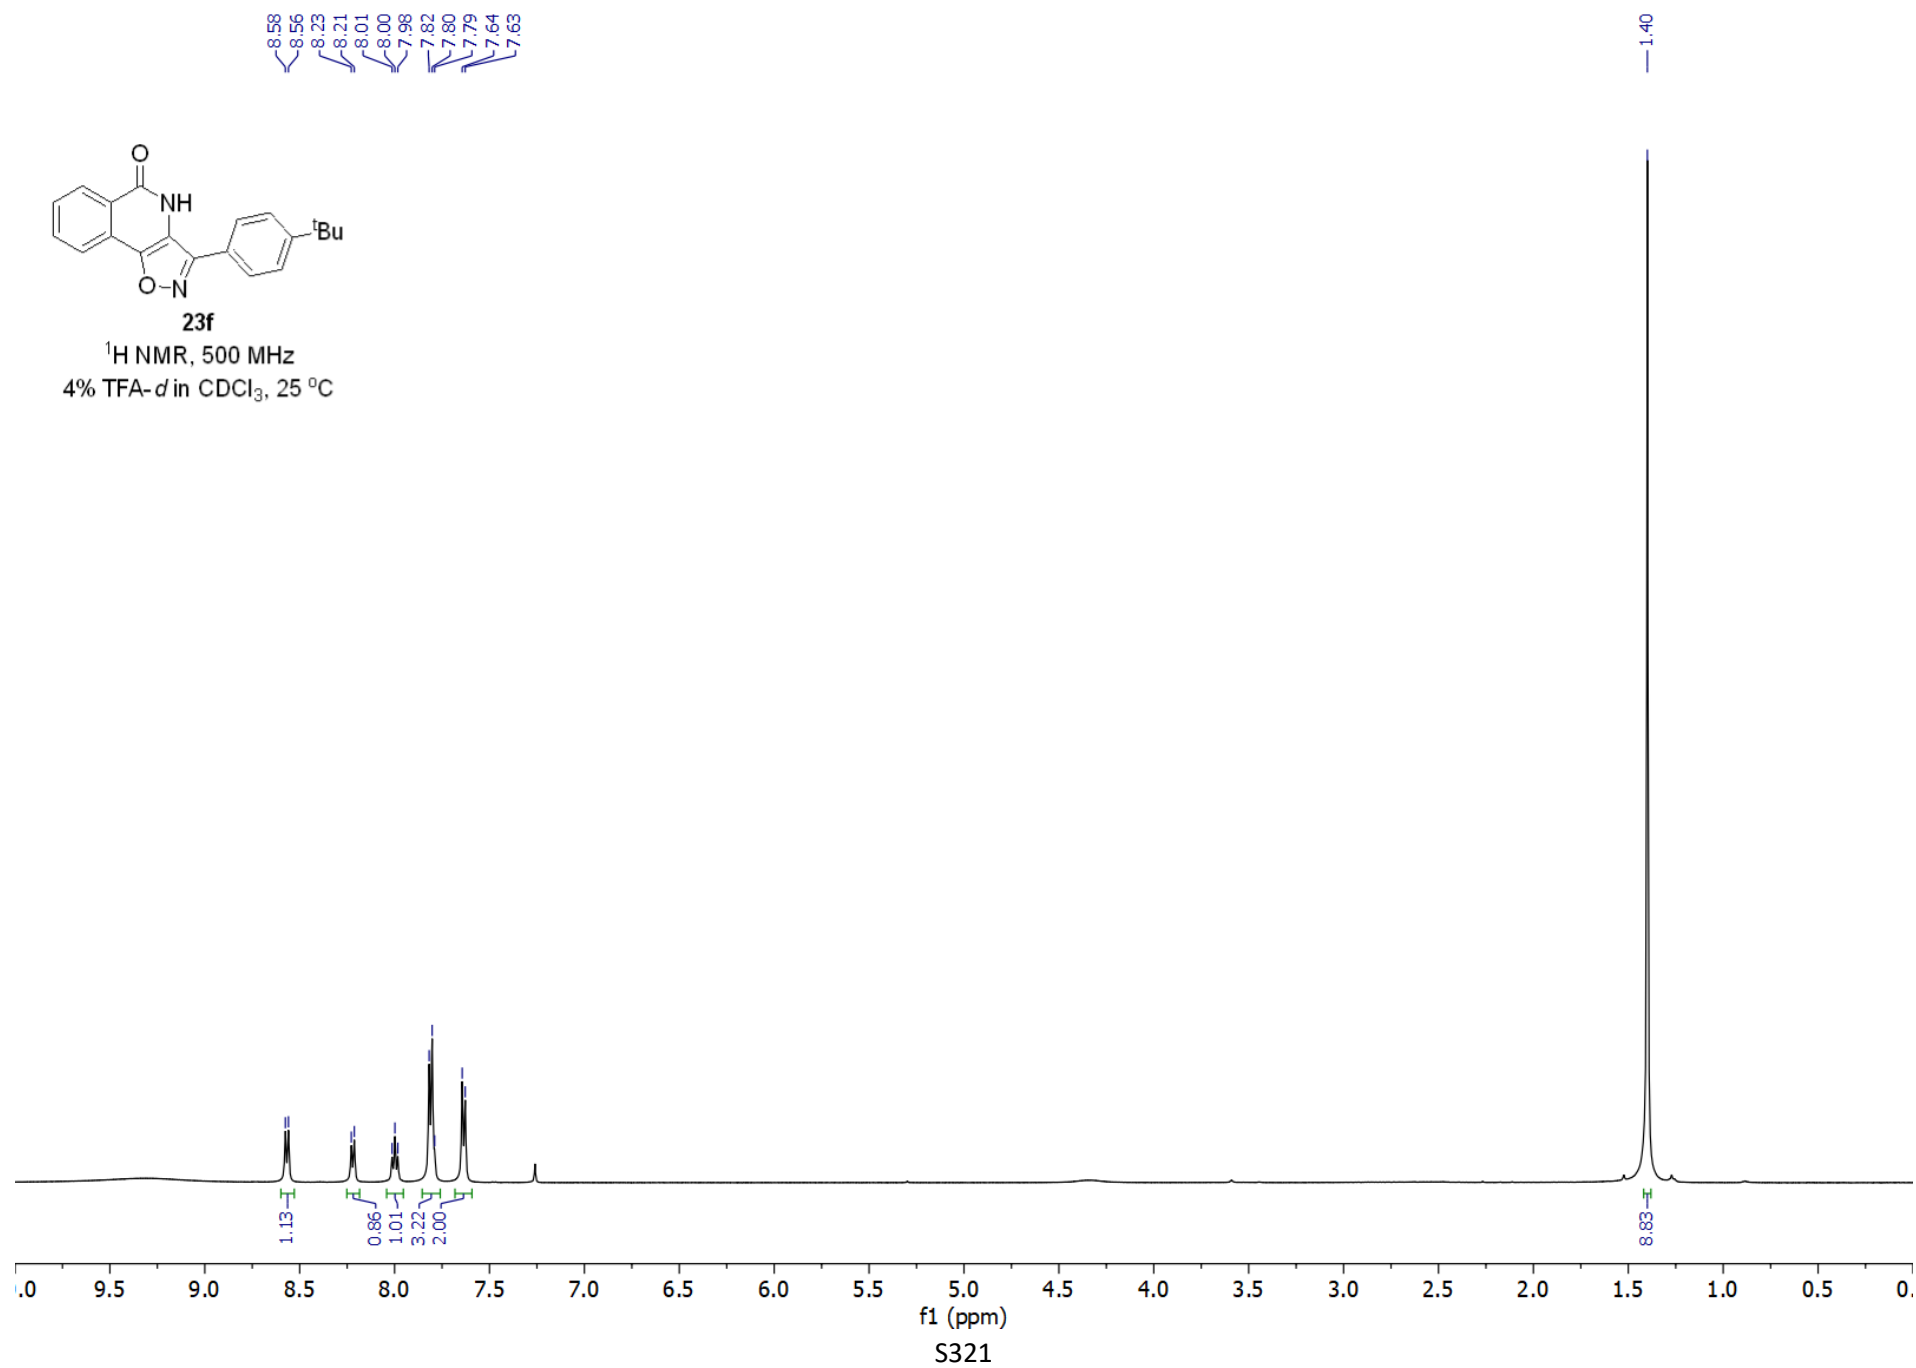

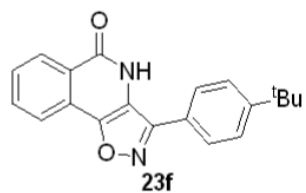

$^{13}\text{C}$  NMR, 125 MHz  
4% TFA-*d* in  $\text{CDCl}_3$ , 25 °C

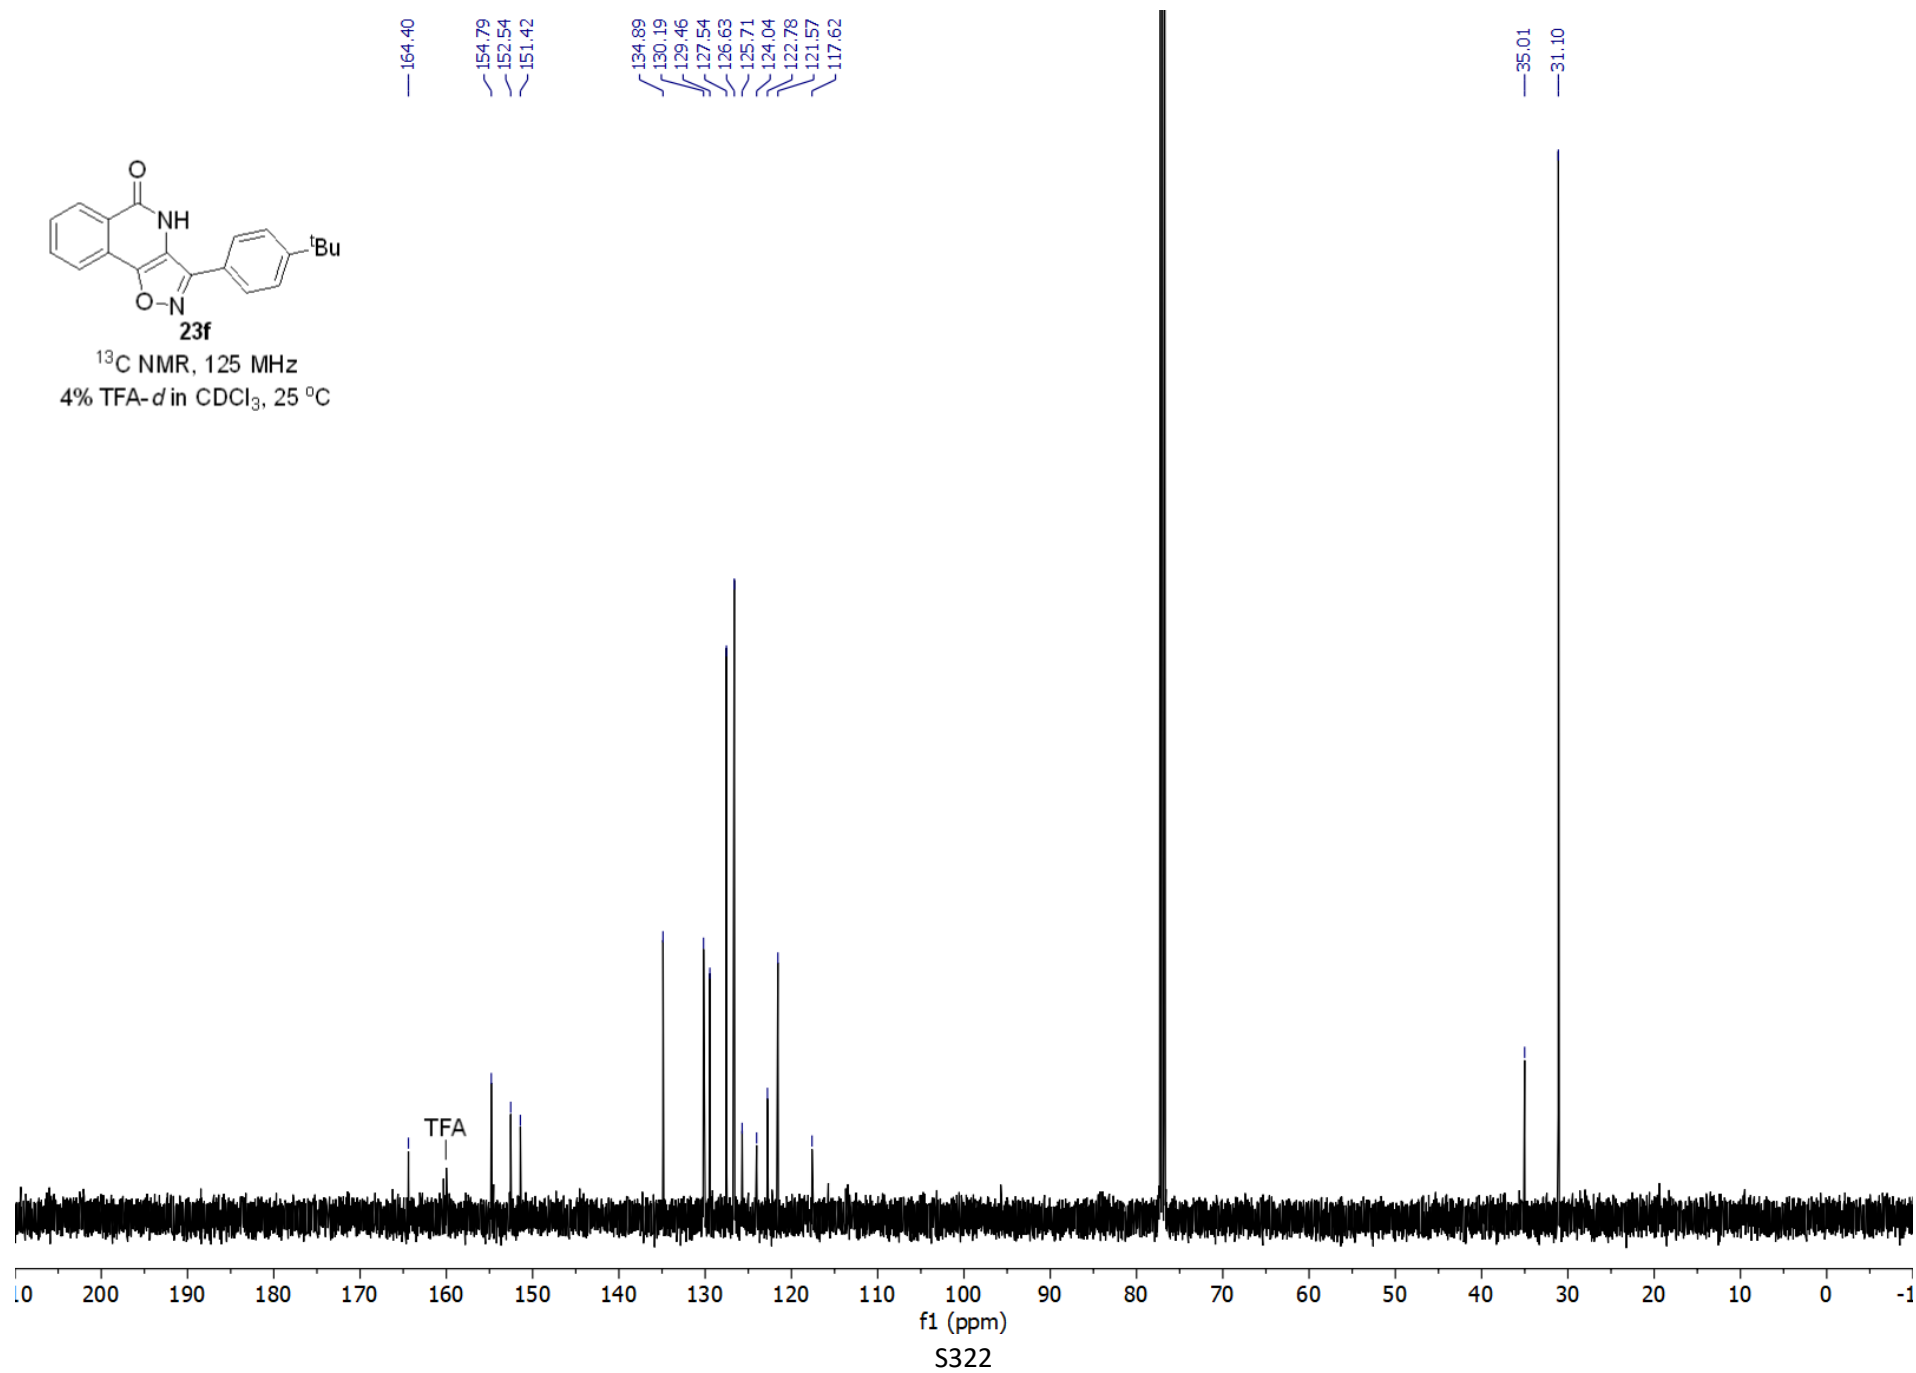

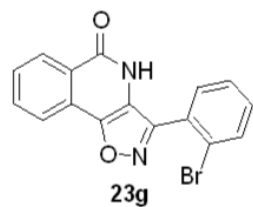

<sup>1</sup>H NMR, 500 MHz  
4% TFA-*d* in CDCl<sub>3</sub>, 25 °C

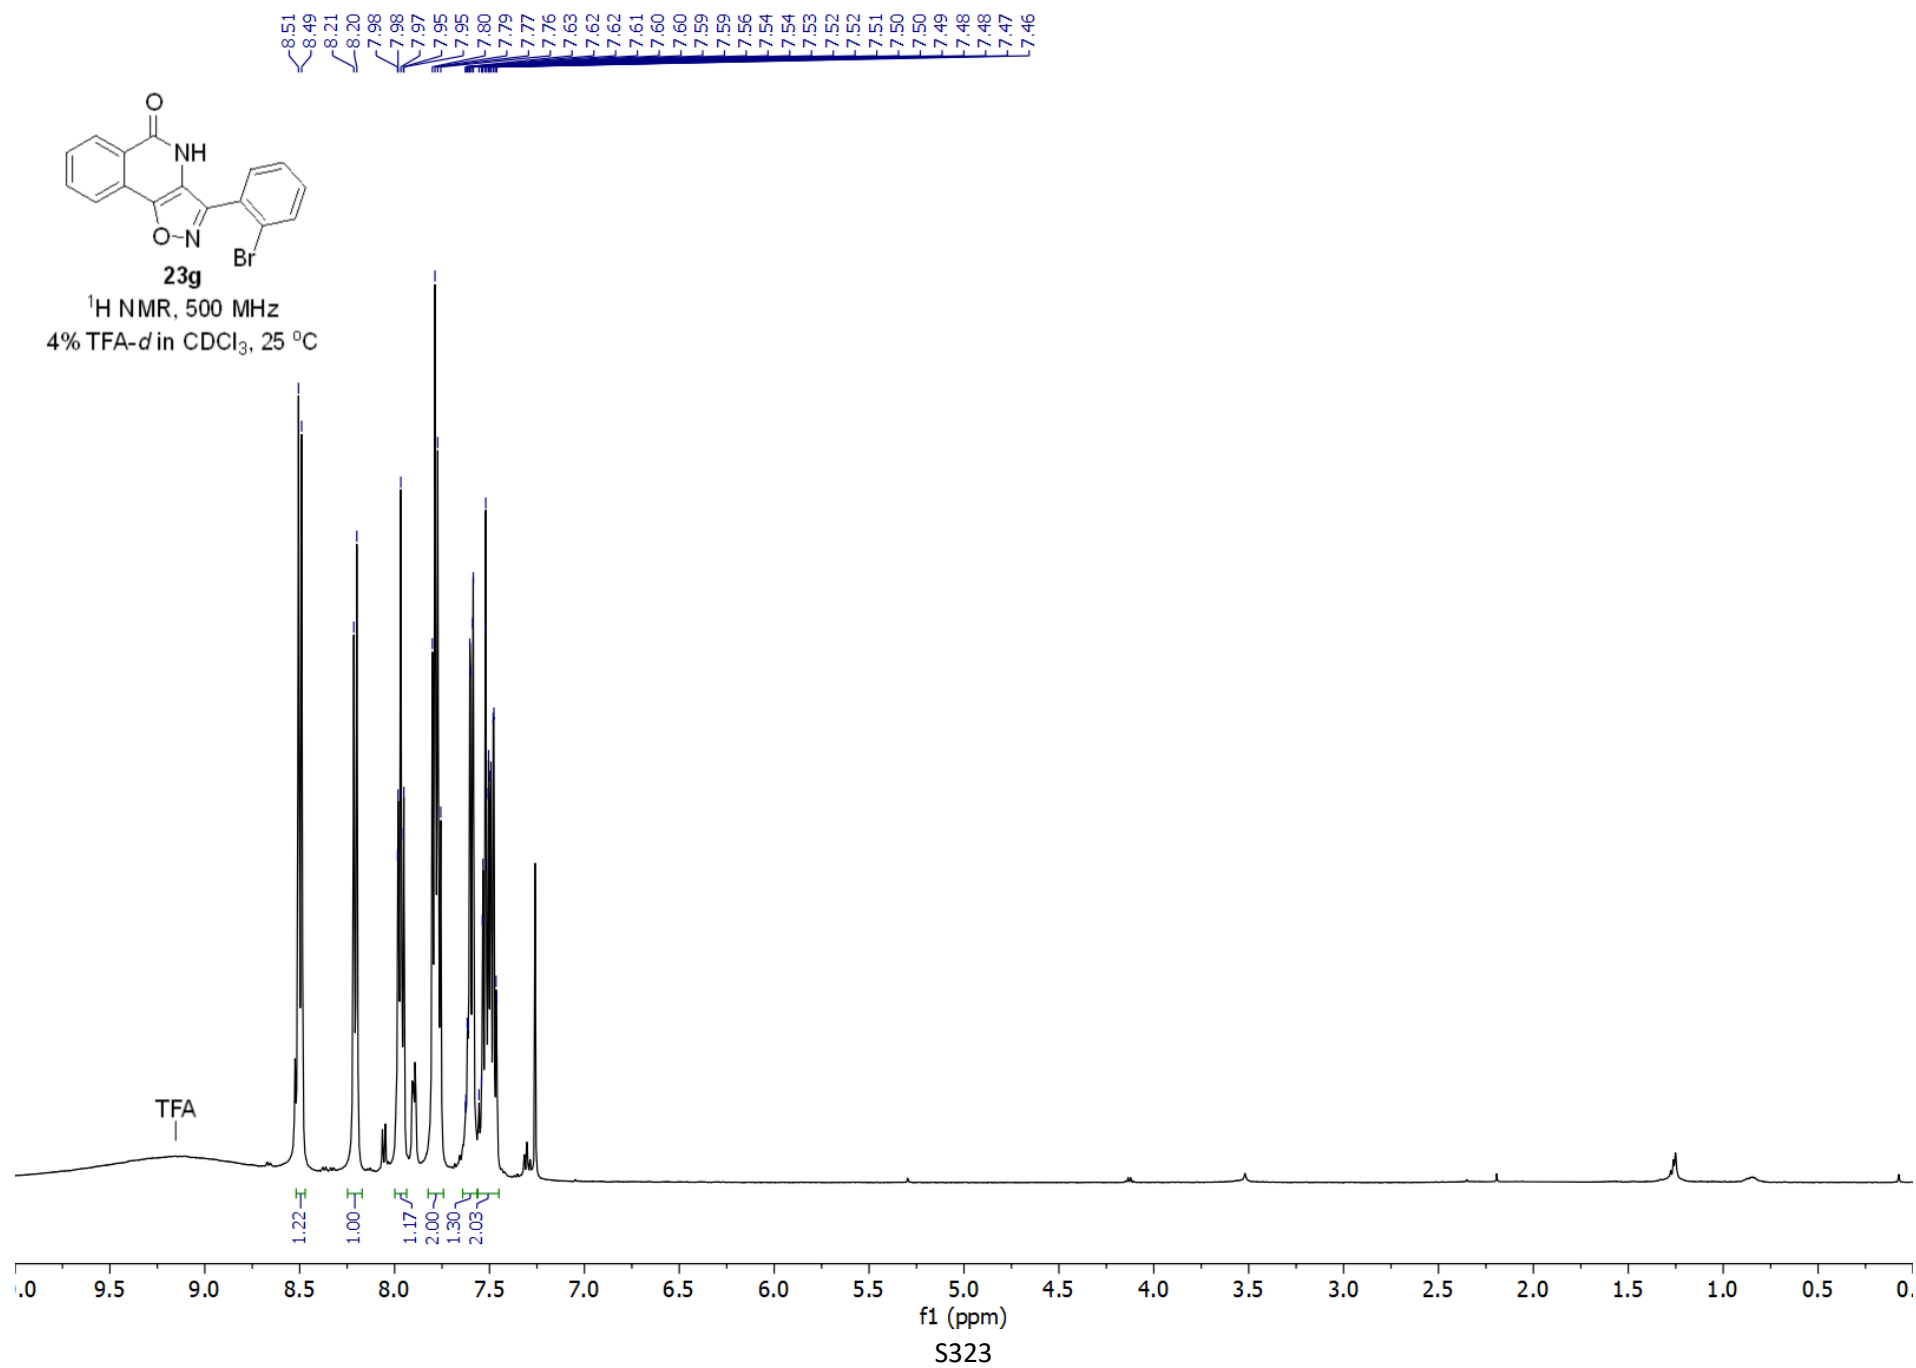

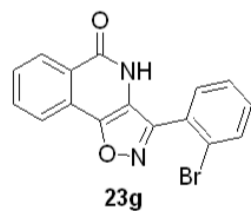

$^{13}\text{C}$  NMR, 125 MHz  
4% TFA-*d* in  $\text{CDCl}_3$ , 25  $^\circ\text{C}$

163.63  
152.91  
150.87  
134.46  
133.60  
132.32  
132.10  
129.92  
129.47  
128.01  
127.81  
127.44  
125.74  
122.76  
121.48  
118.78

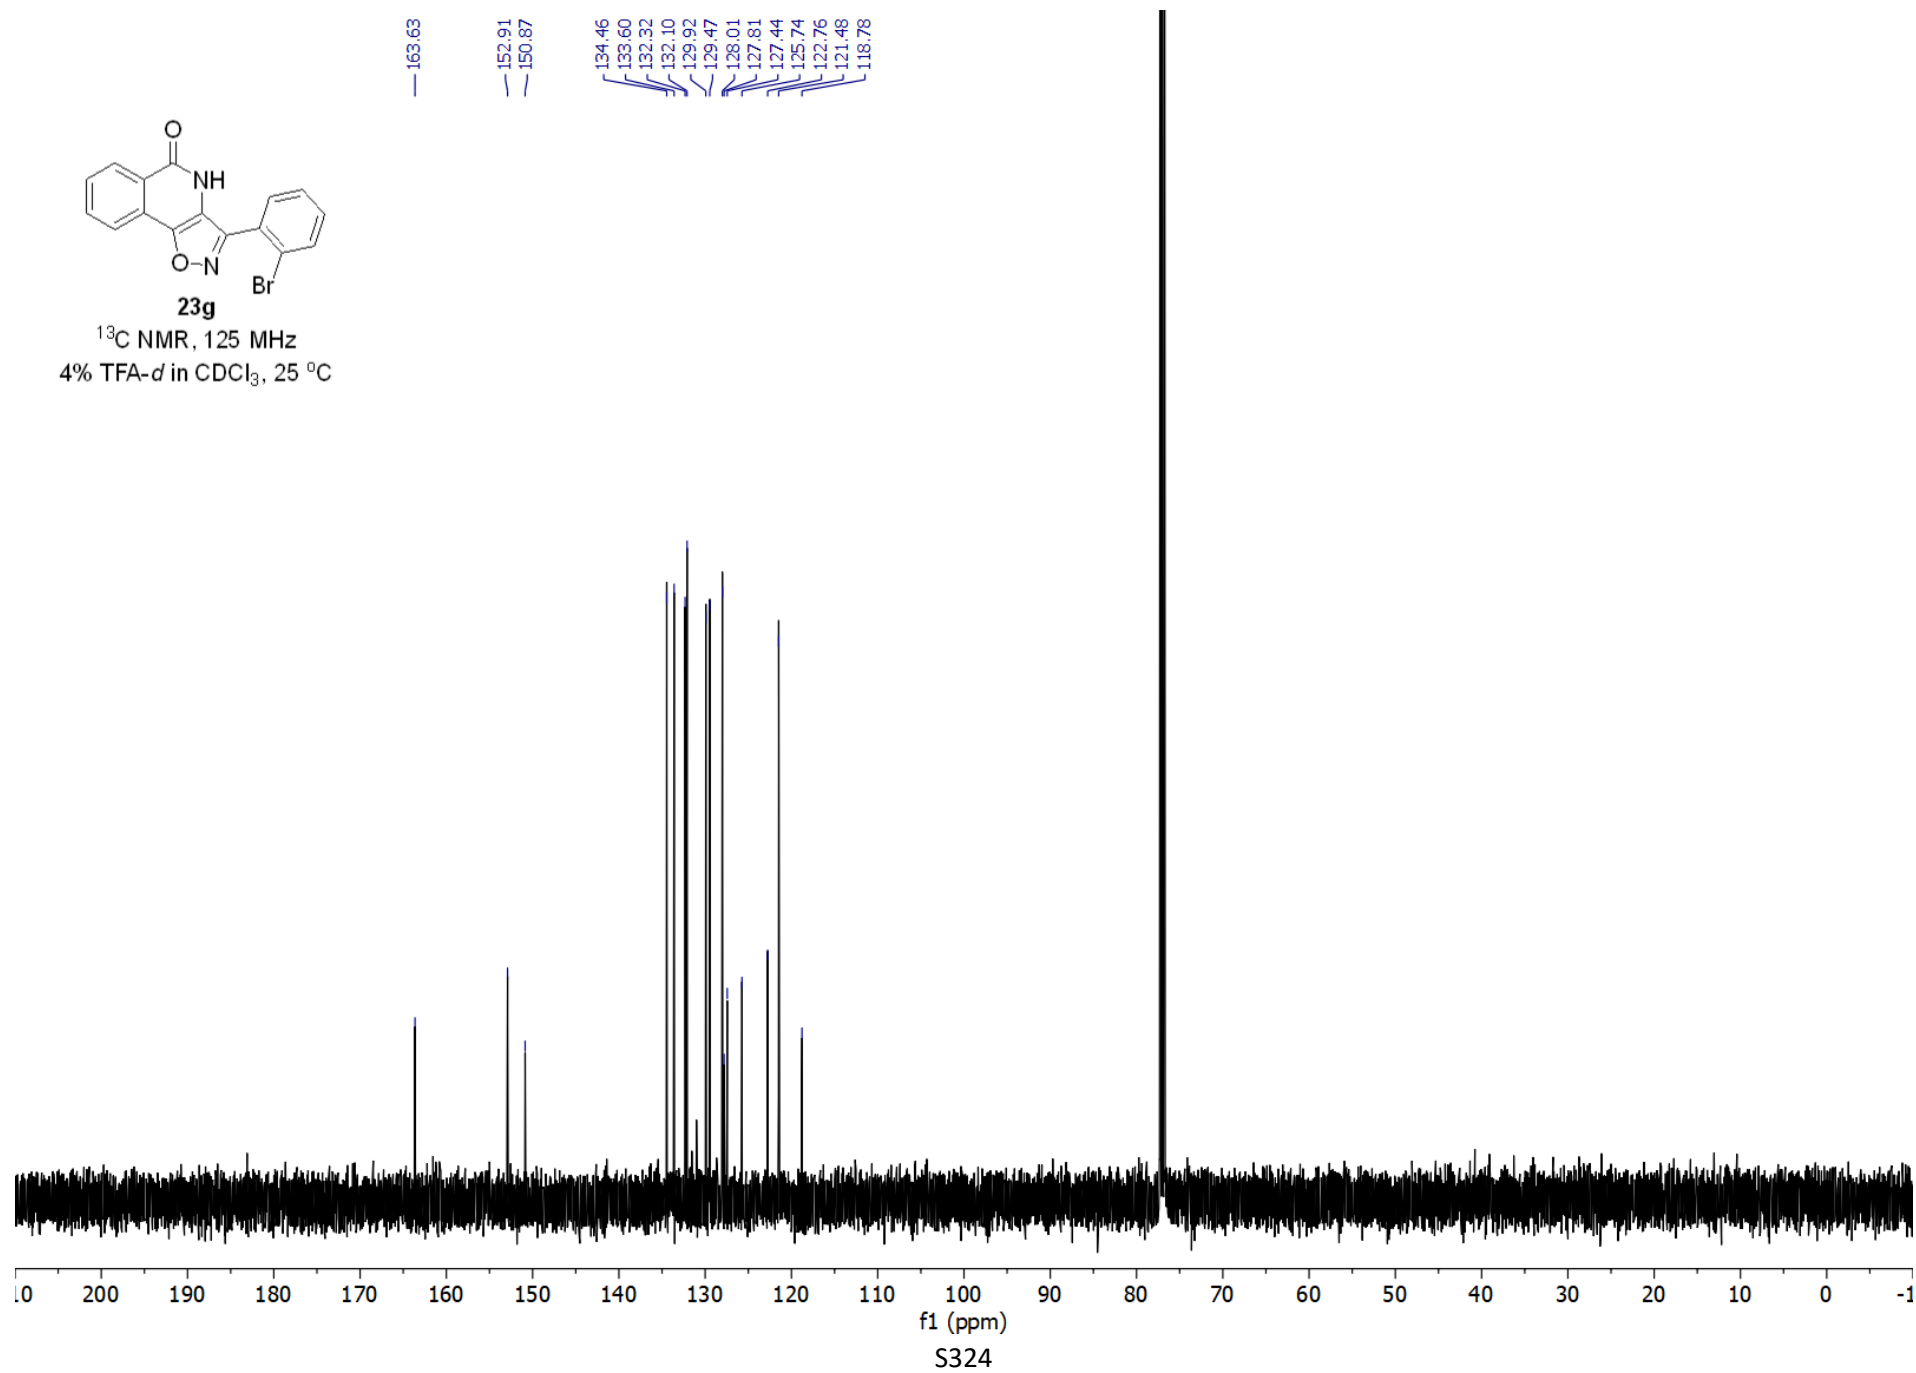

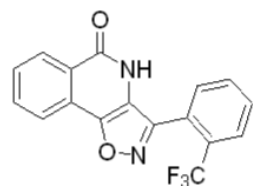

**23h**

$^1\text{H}$  NMR, 500 MHz  
DMSO- $d_6$ , 25  $^\circ\text{C}$

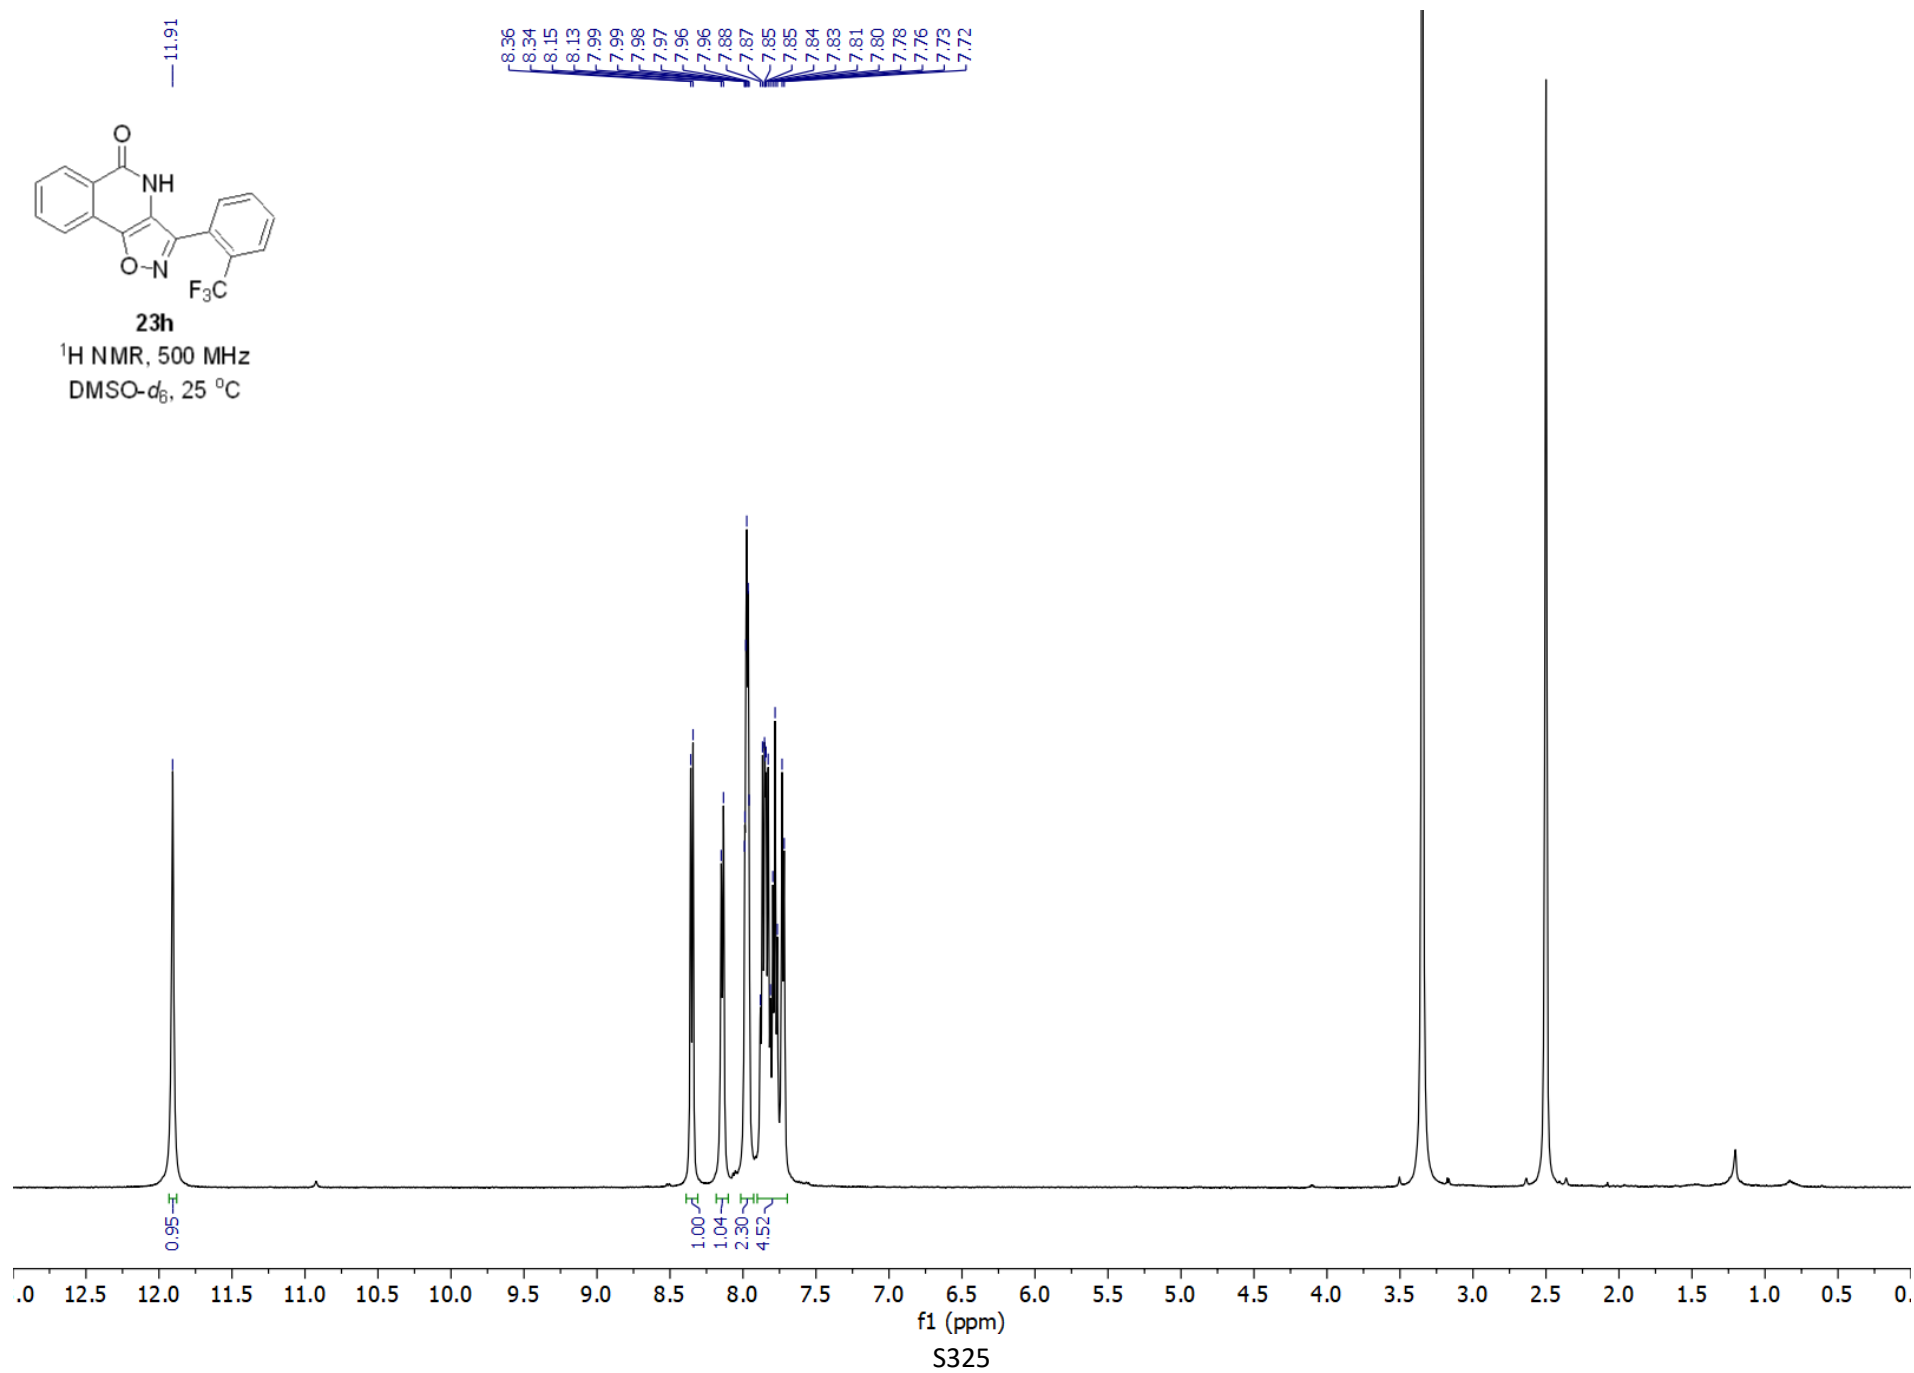

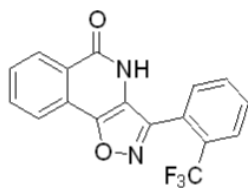

**23h**

$^{13}\text{C}$  NMR, 125 MHz

$\text{DMSO-}d_6$ , 25 °C

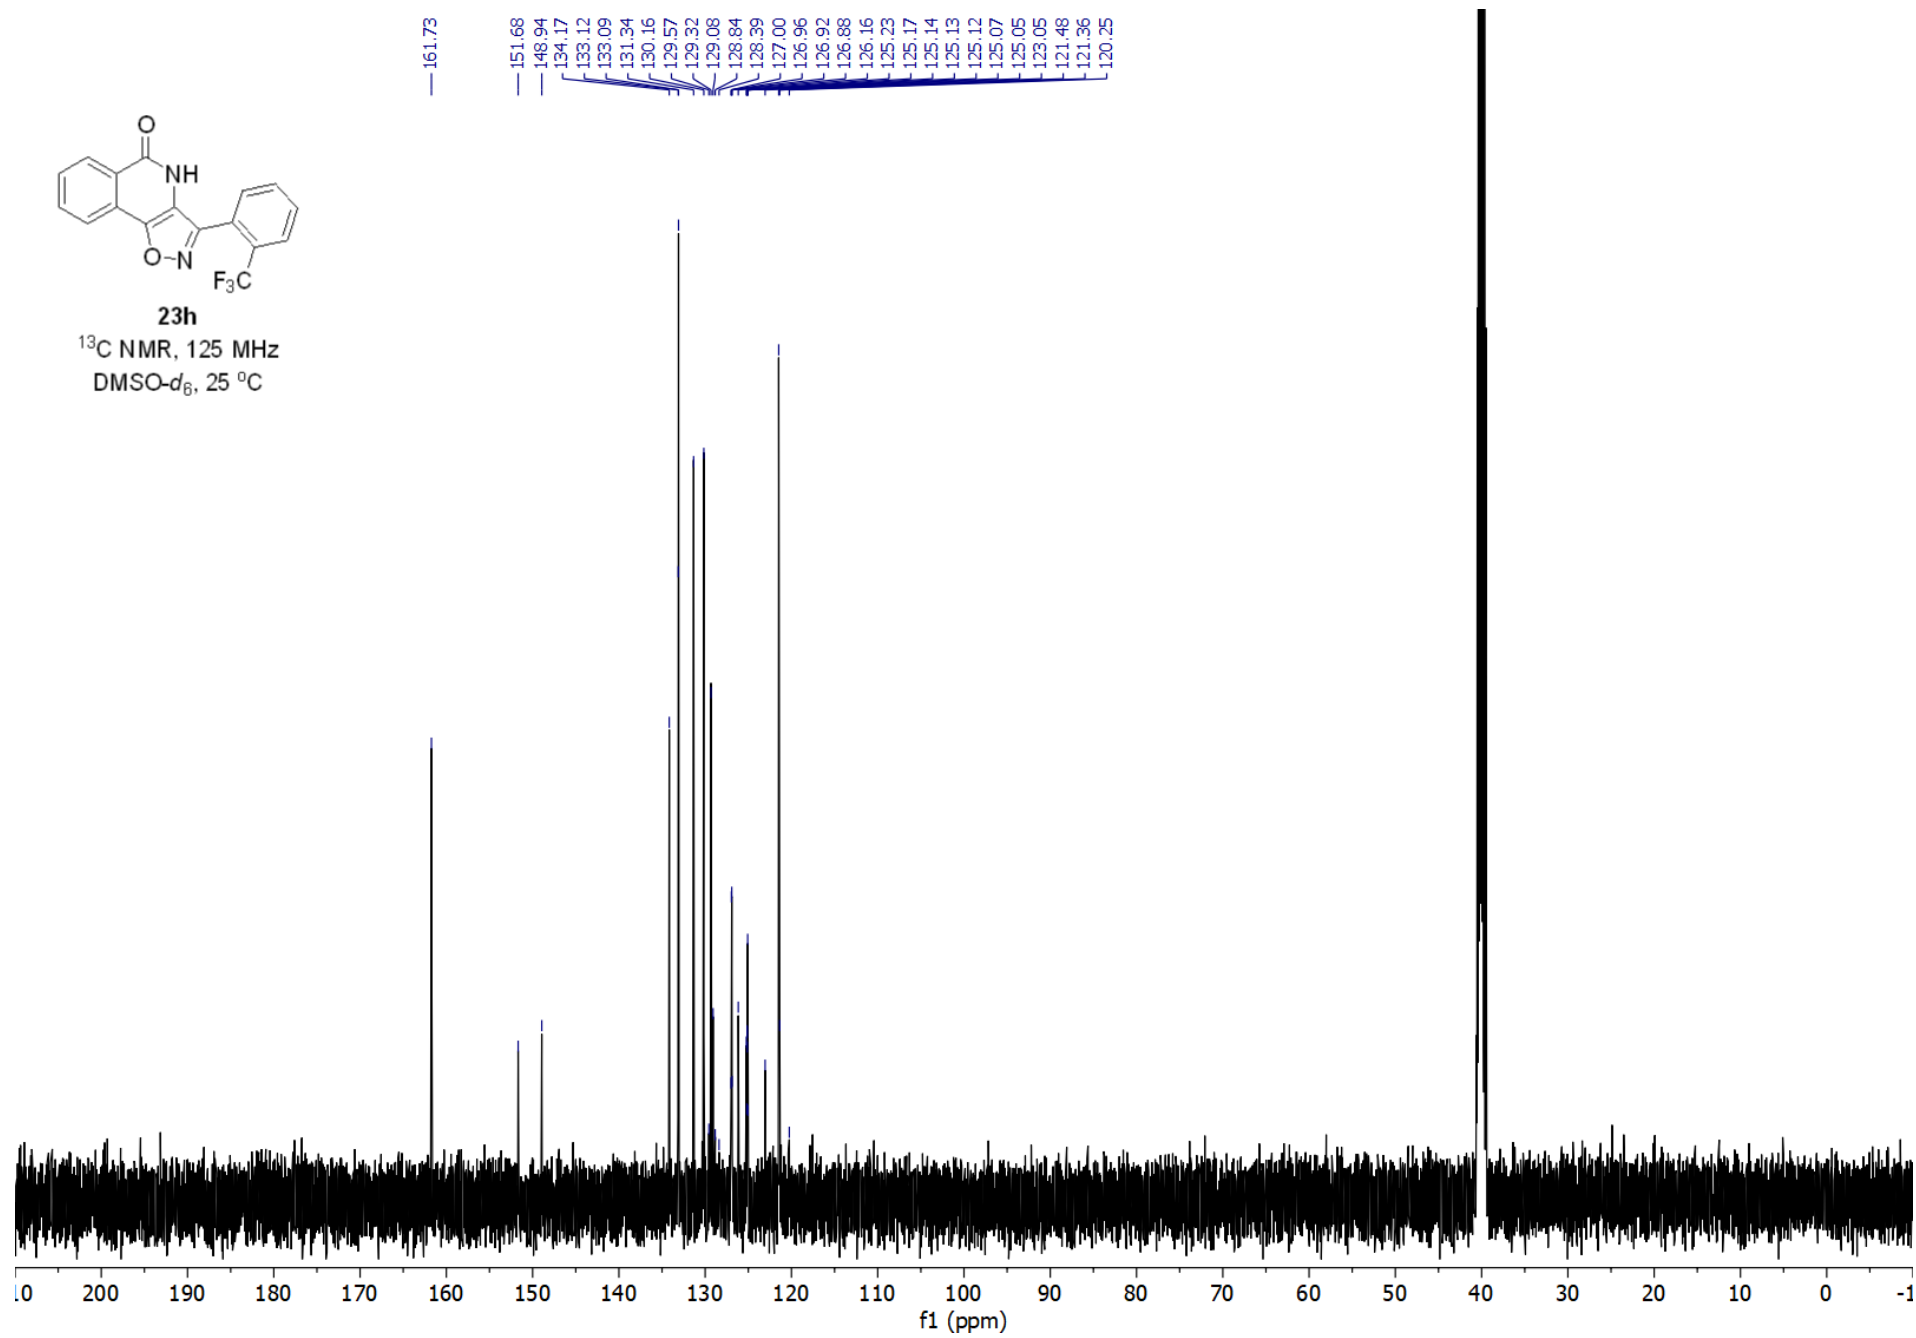

S326

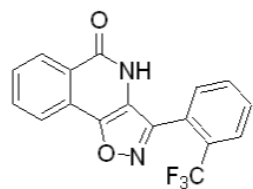

**23h**

$^{19}\text{F}$  NMR, 470 MHz  
DMSO- $d_6$ , 25 °C

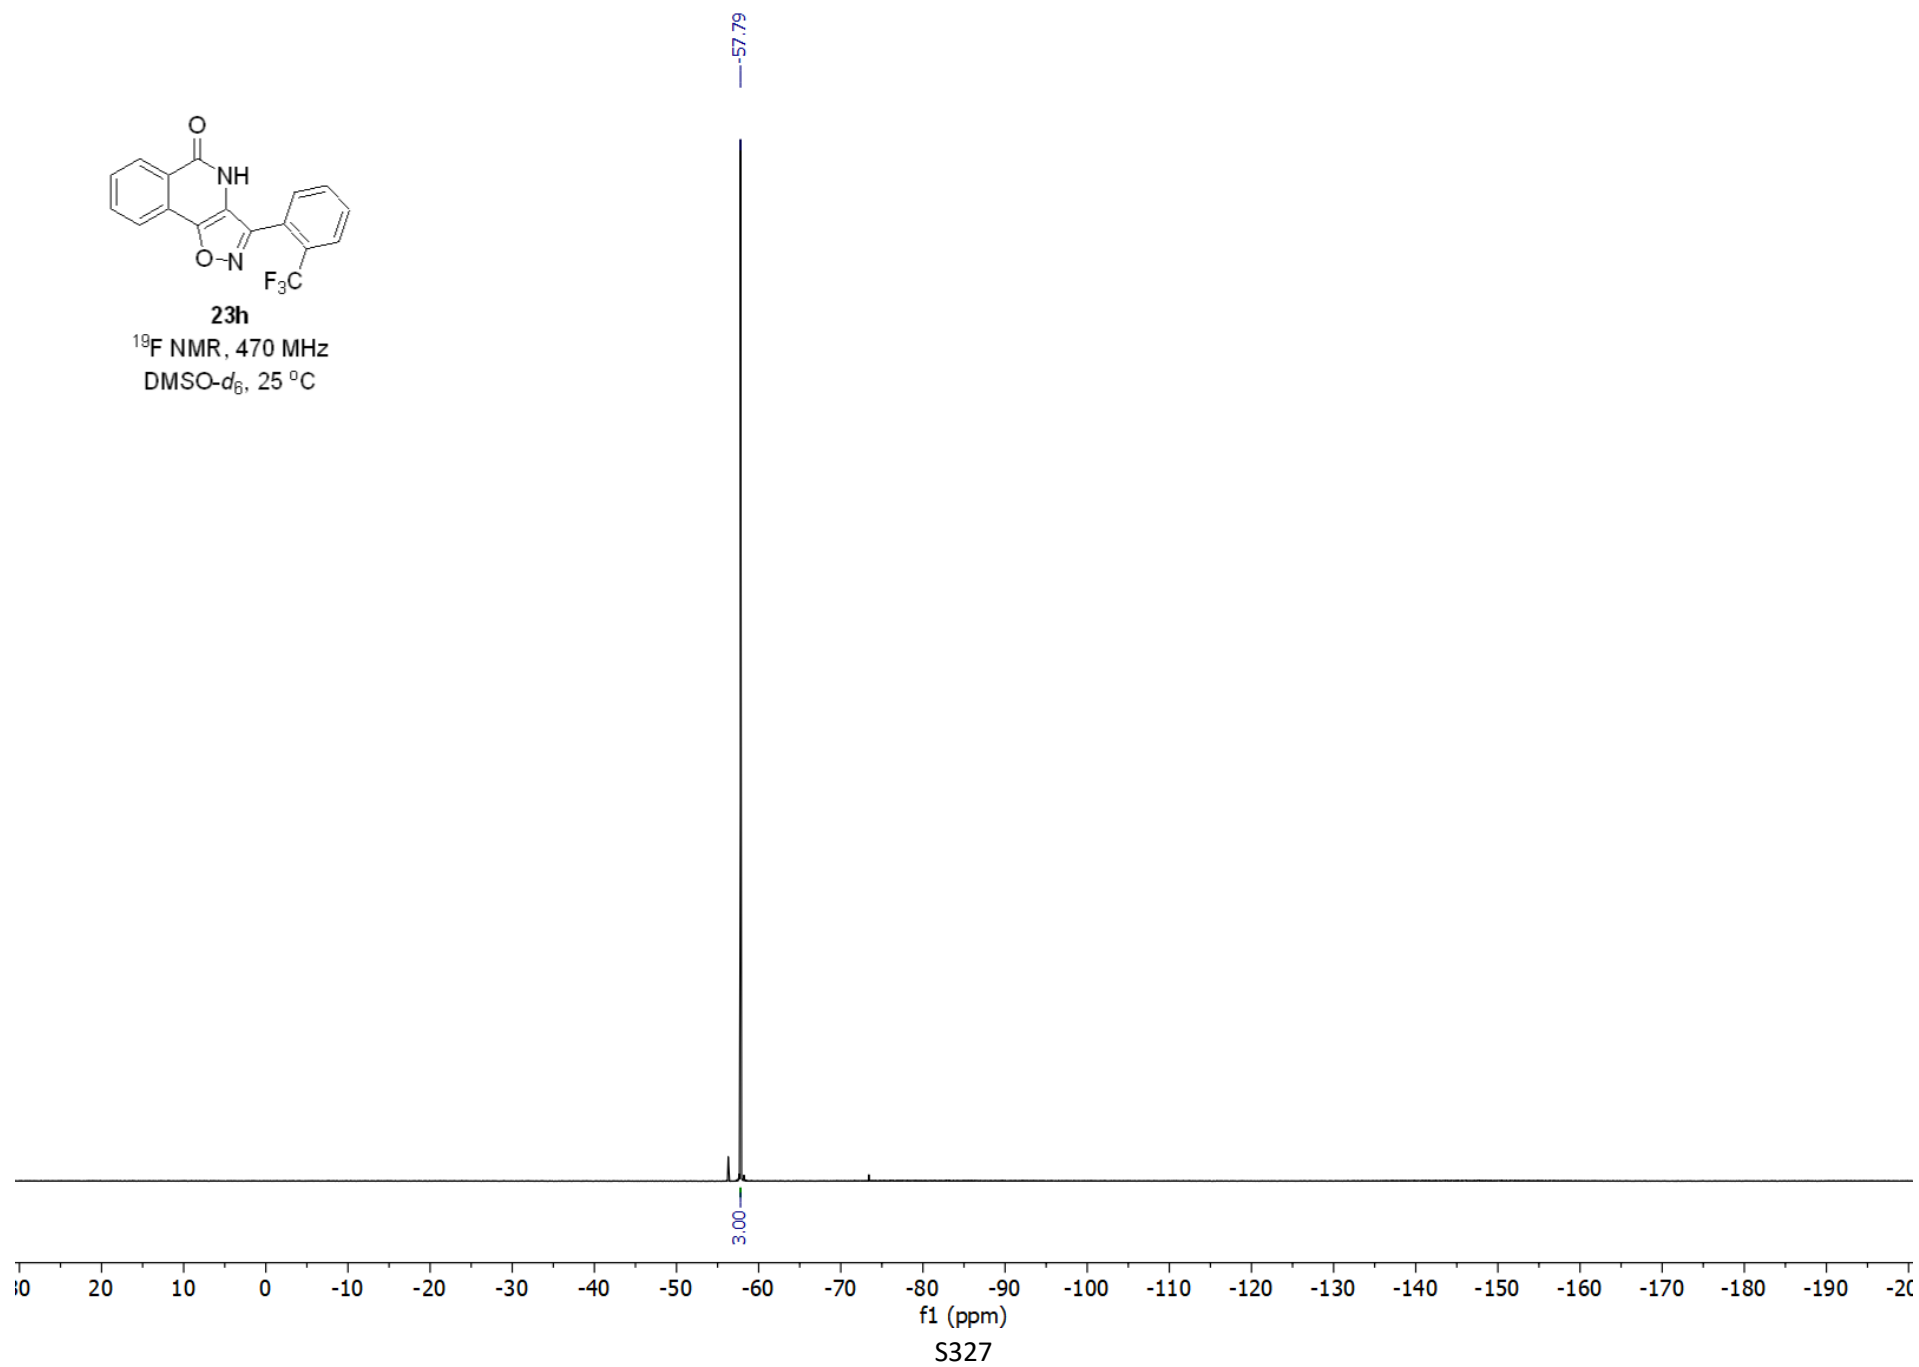

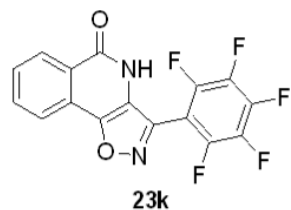

<sup>1</sup>H NMR, 500 MHz  
4% TFA-*d* in CDCl<sub>3</sub>, 25 °C

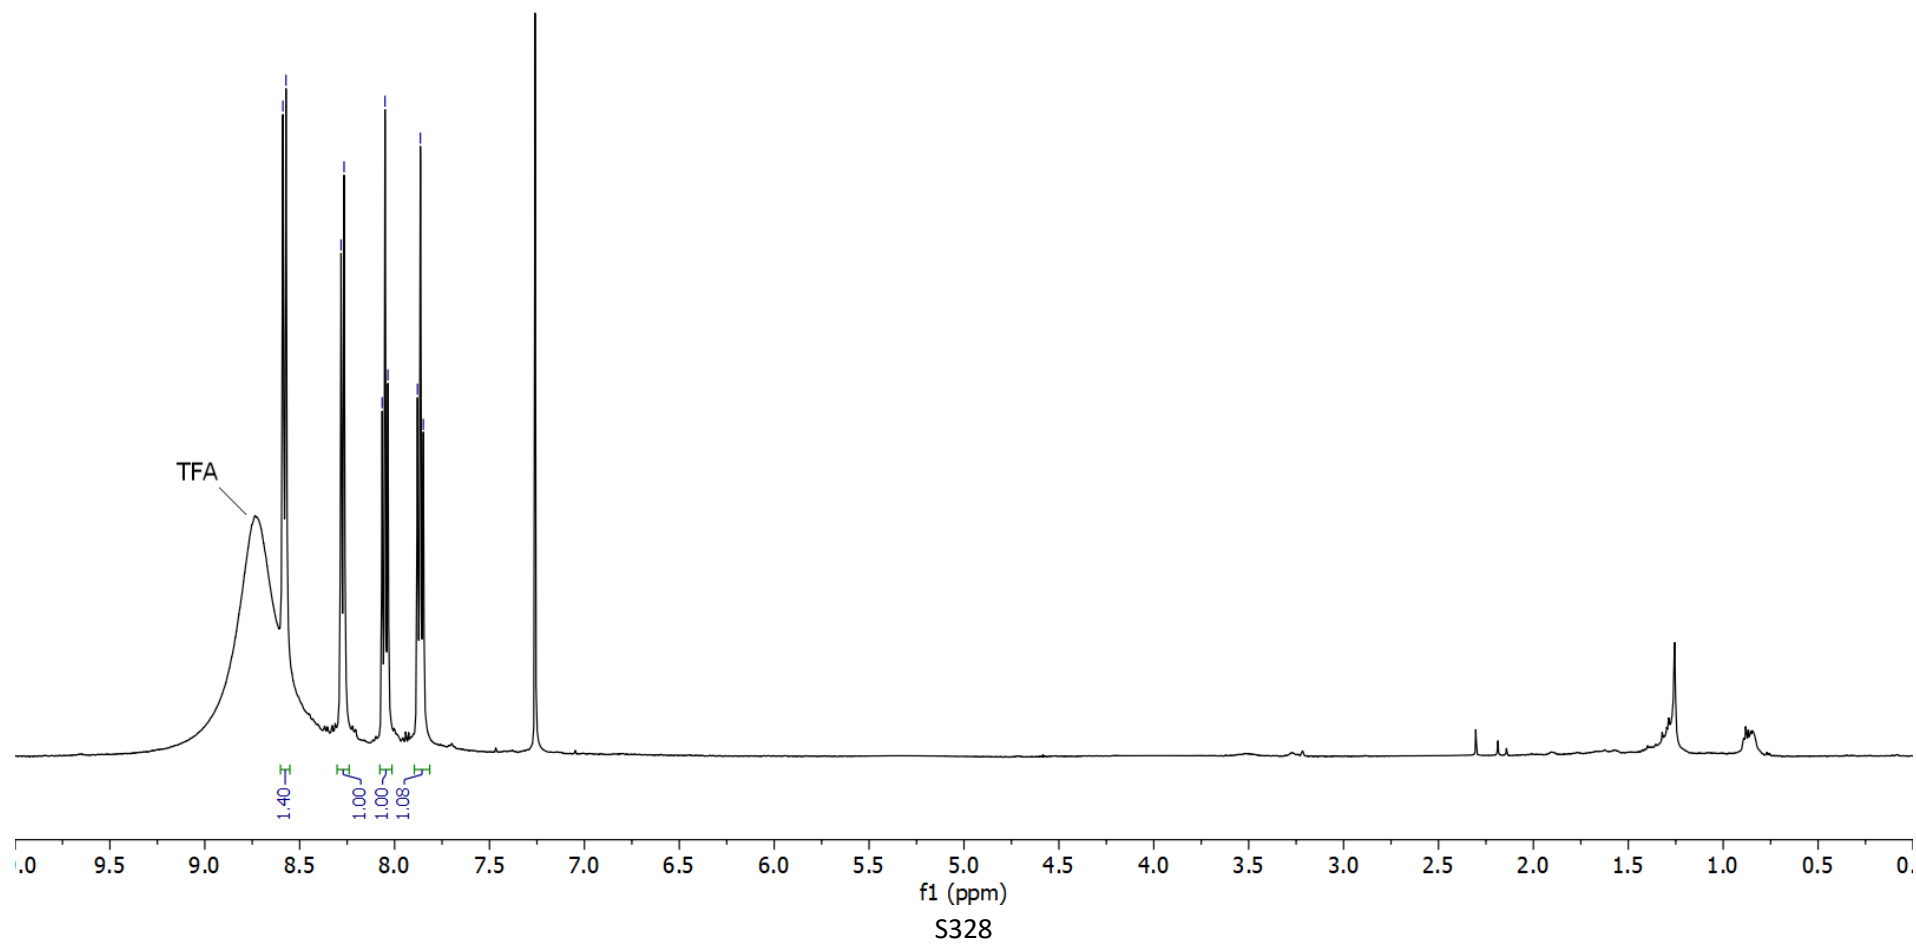

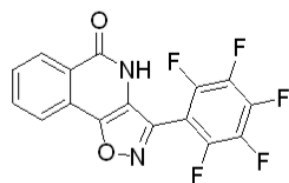

**23k**

$^{13}\text{C}$  NMR, 125 MHz  
4% TFA-*d* in  $\text{CDCl}_3$ , 25 °C

164.50  
152.06  
141.53  
135.12  
130.66  
129.56  
125.32  
124.14  
121.62  
118.61

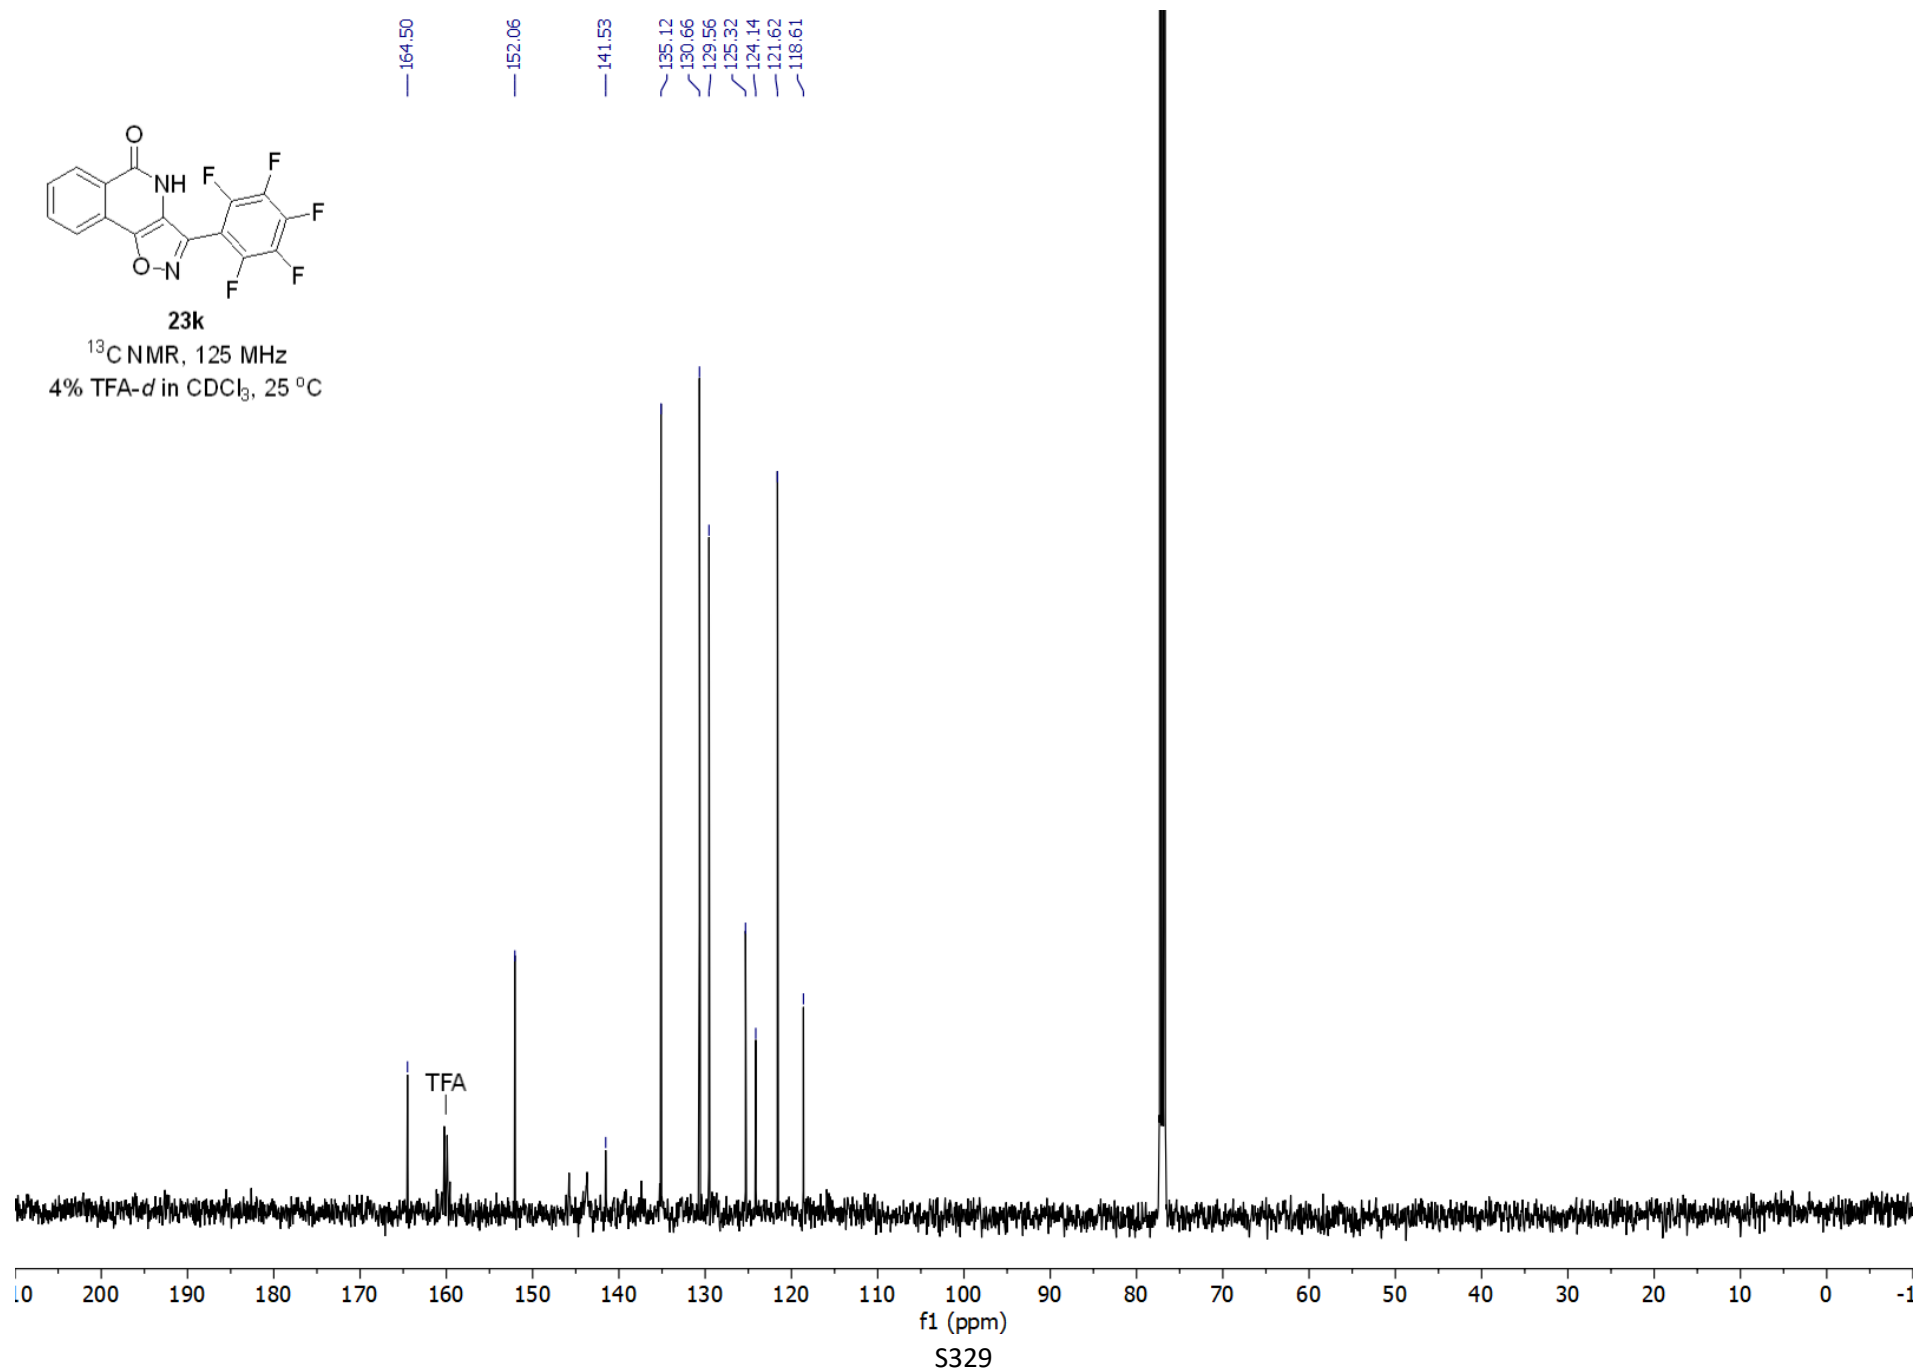

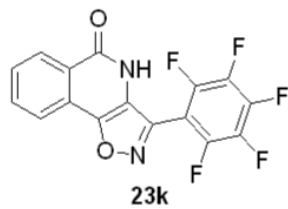

$^1\text{H}$  NMR, 500 MHz  
4% TFA-*d* in  $\text{CDCl}_3$ , 25 °C

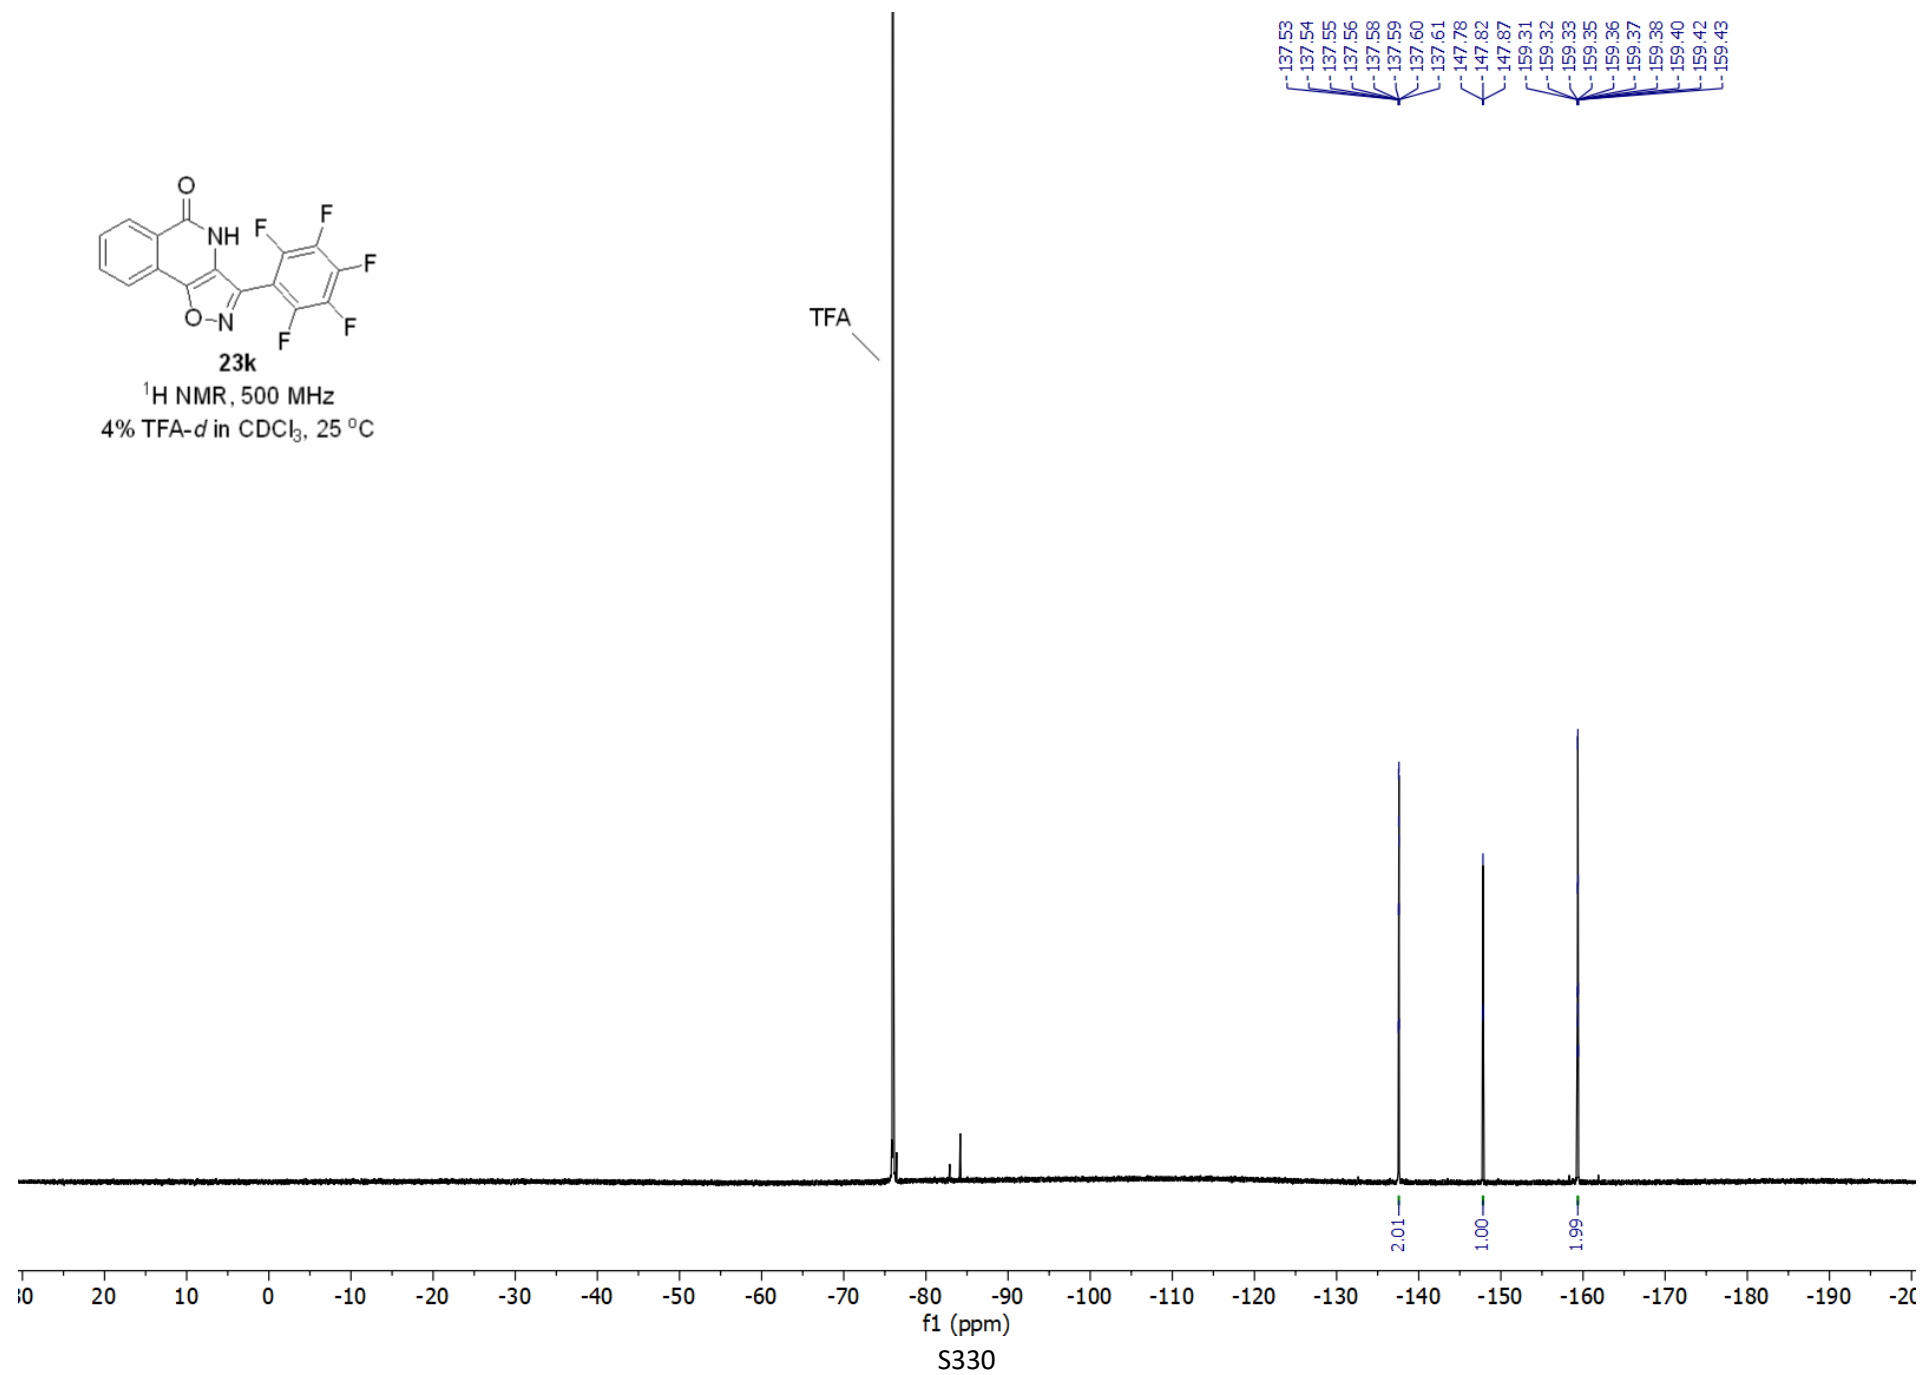

137.53  
137.54  
137.55  
137.56  
137.58  
137.59  
137.60  
137.61  
147.78  
147.82  
147.87  
159.31  
159.32  
159.33  
159.35  
159.36  
159.37  
159.38  
159.40  
159.42  
159.43

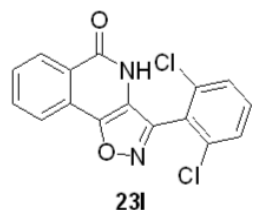

$^1\text{H}$  NMR, 500 MHz  
4% TFA-*d* in  $\text{CDCl}_3$ , 25 °C

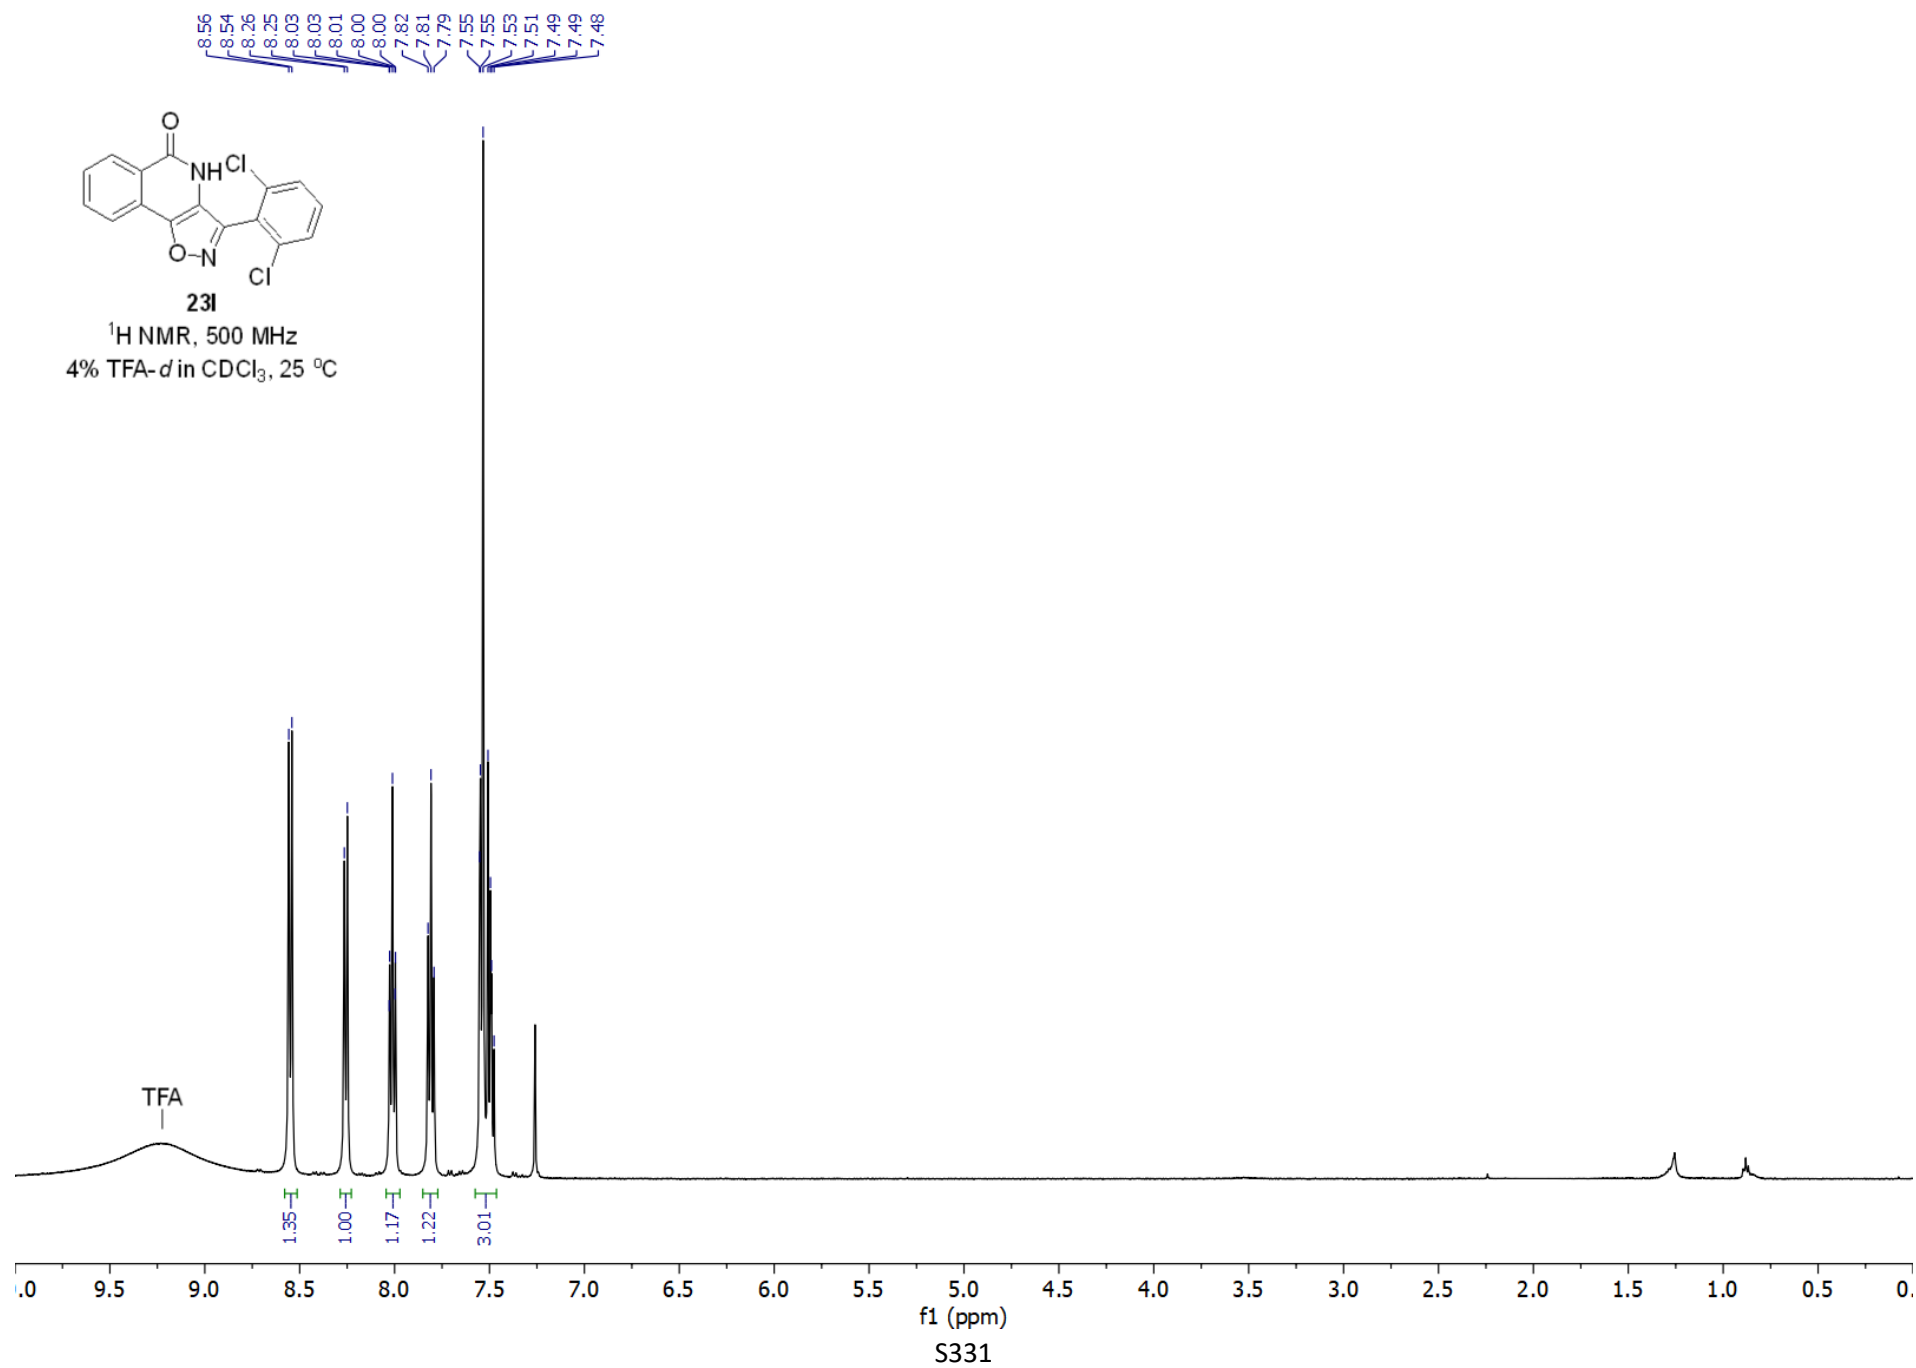

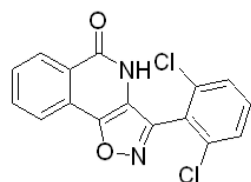

**23I**

$^{13}\text{C}$  NMR, 125 MHz  
4% TFA-*d* in  $\text{CDCl}_3$ , 25 °C

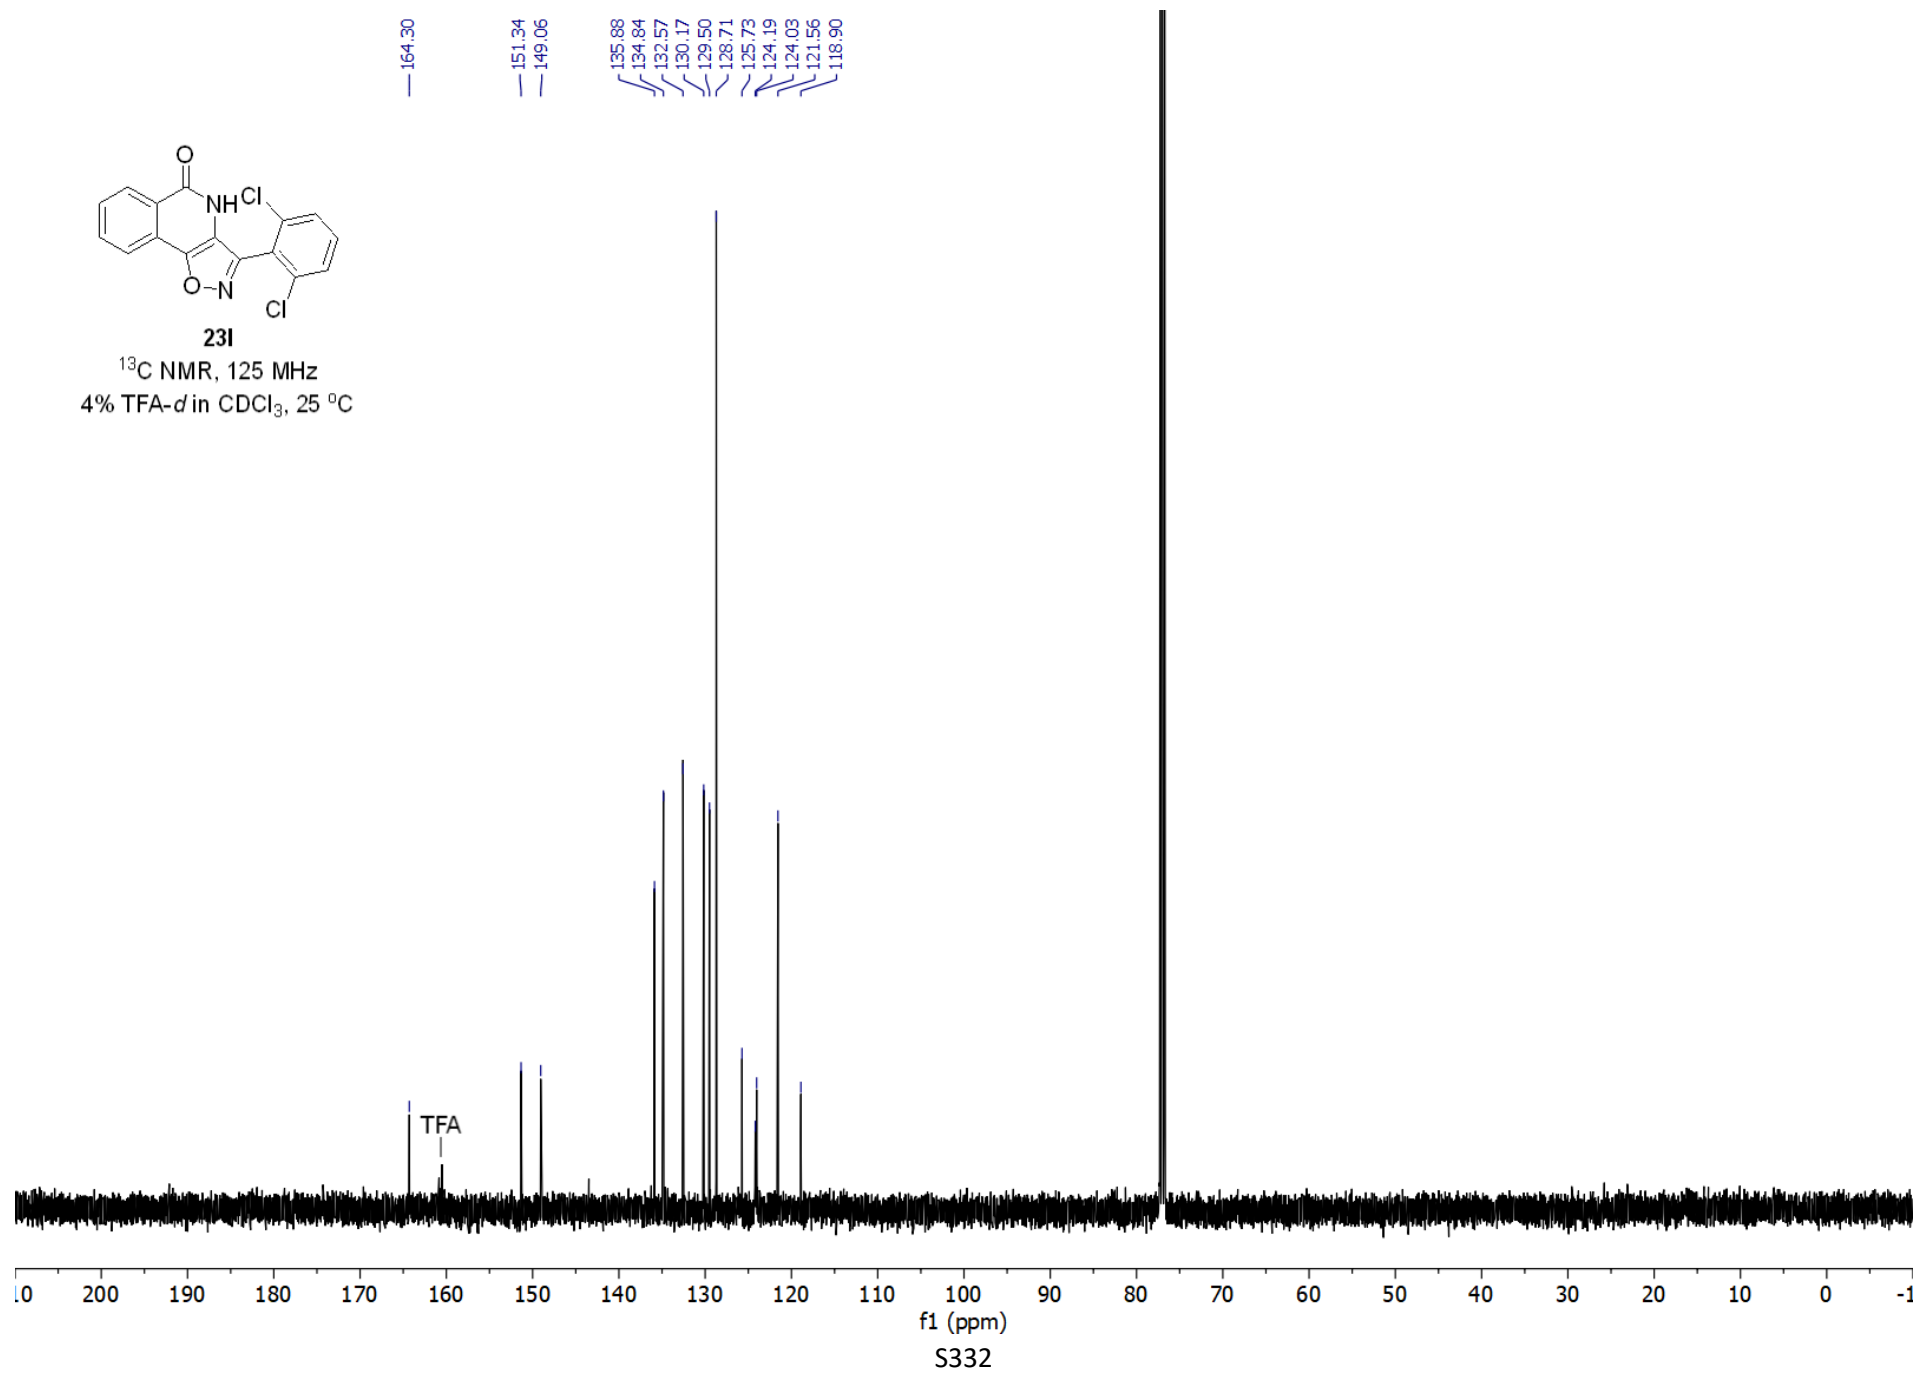

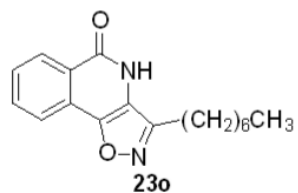

<sup>1</sup>H NMR, 500 MHz  
DMSO-d<sub>6</sub>, 25 °C

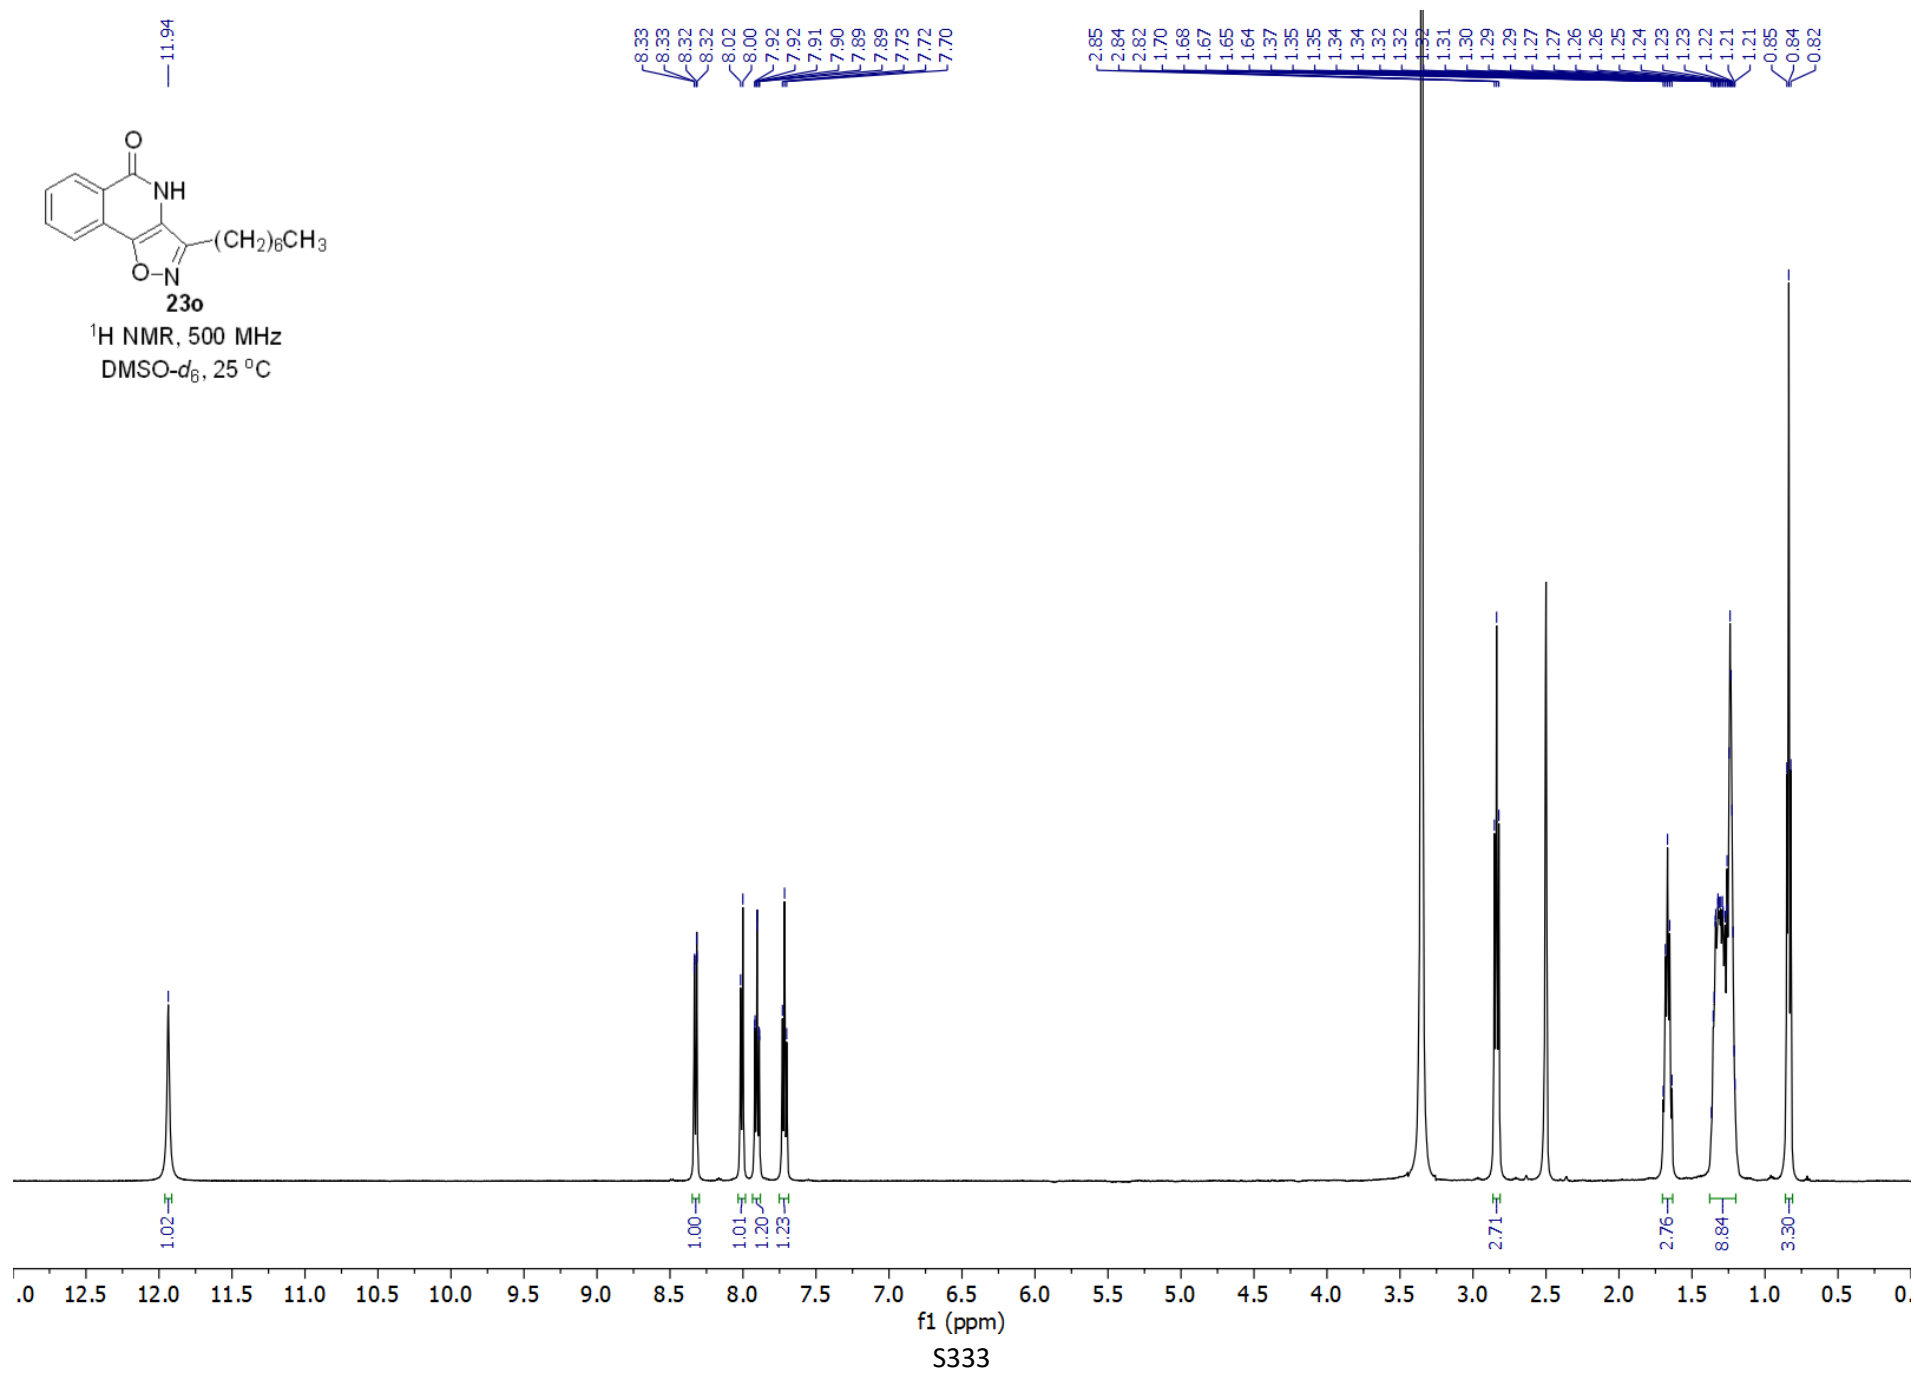

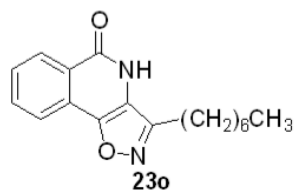

<sup>13</sup>C NMR, 125 MHz  
DMSO-*d*<sub>6</sub>, 25 °C

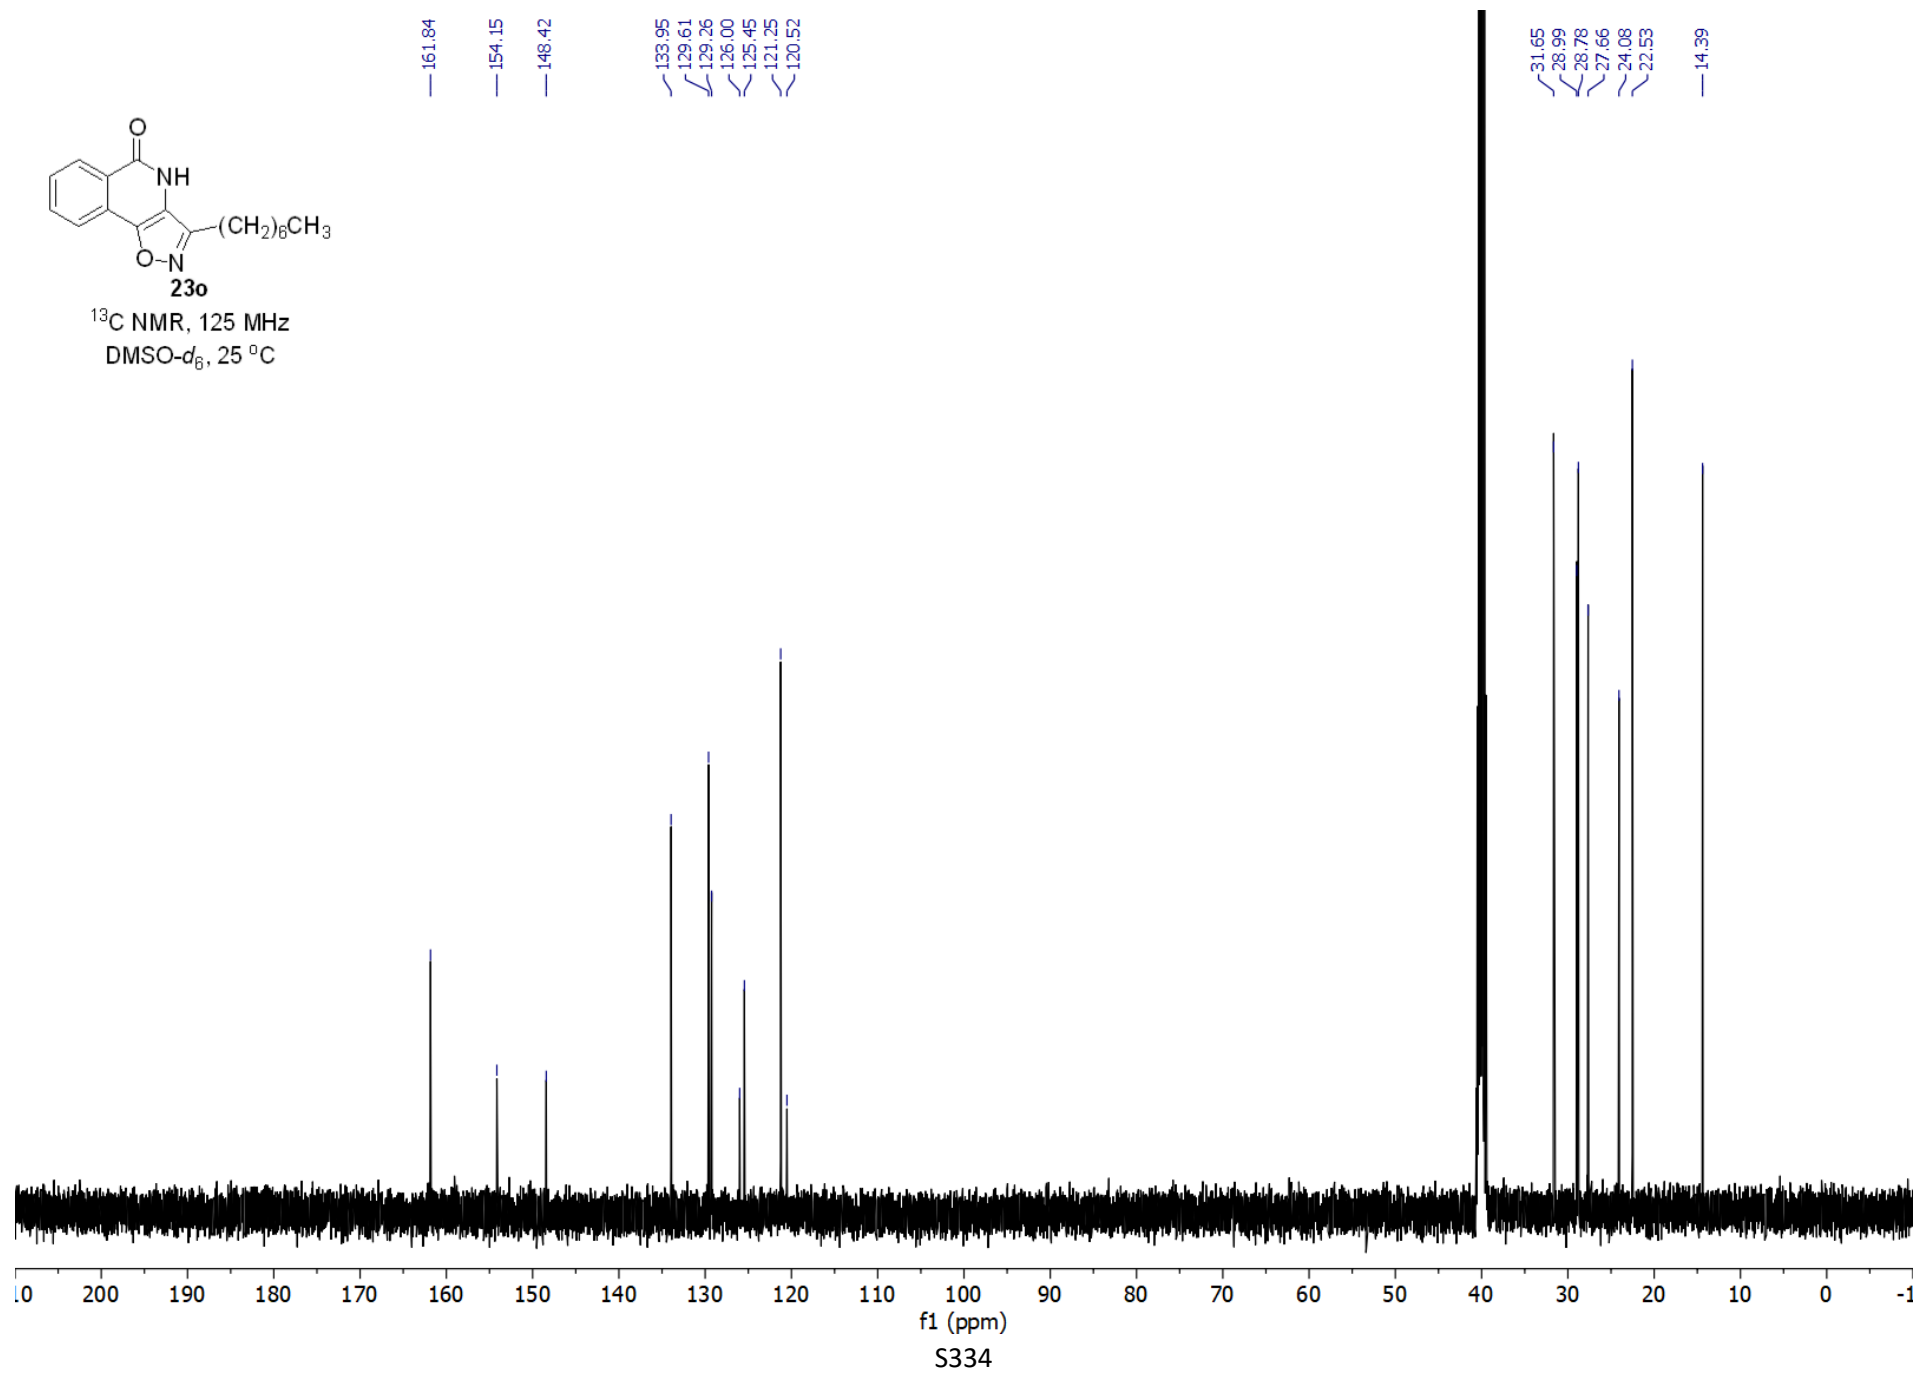

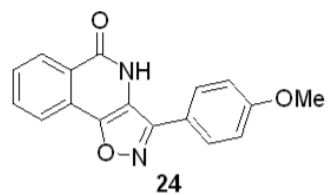

$^1\text{H}$  NMR, 500 MHz  
4% TFA-*d* in  $\text{CDCl}_3$ , 25 °C

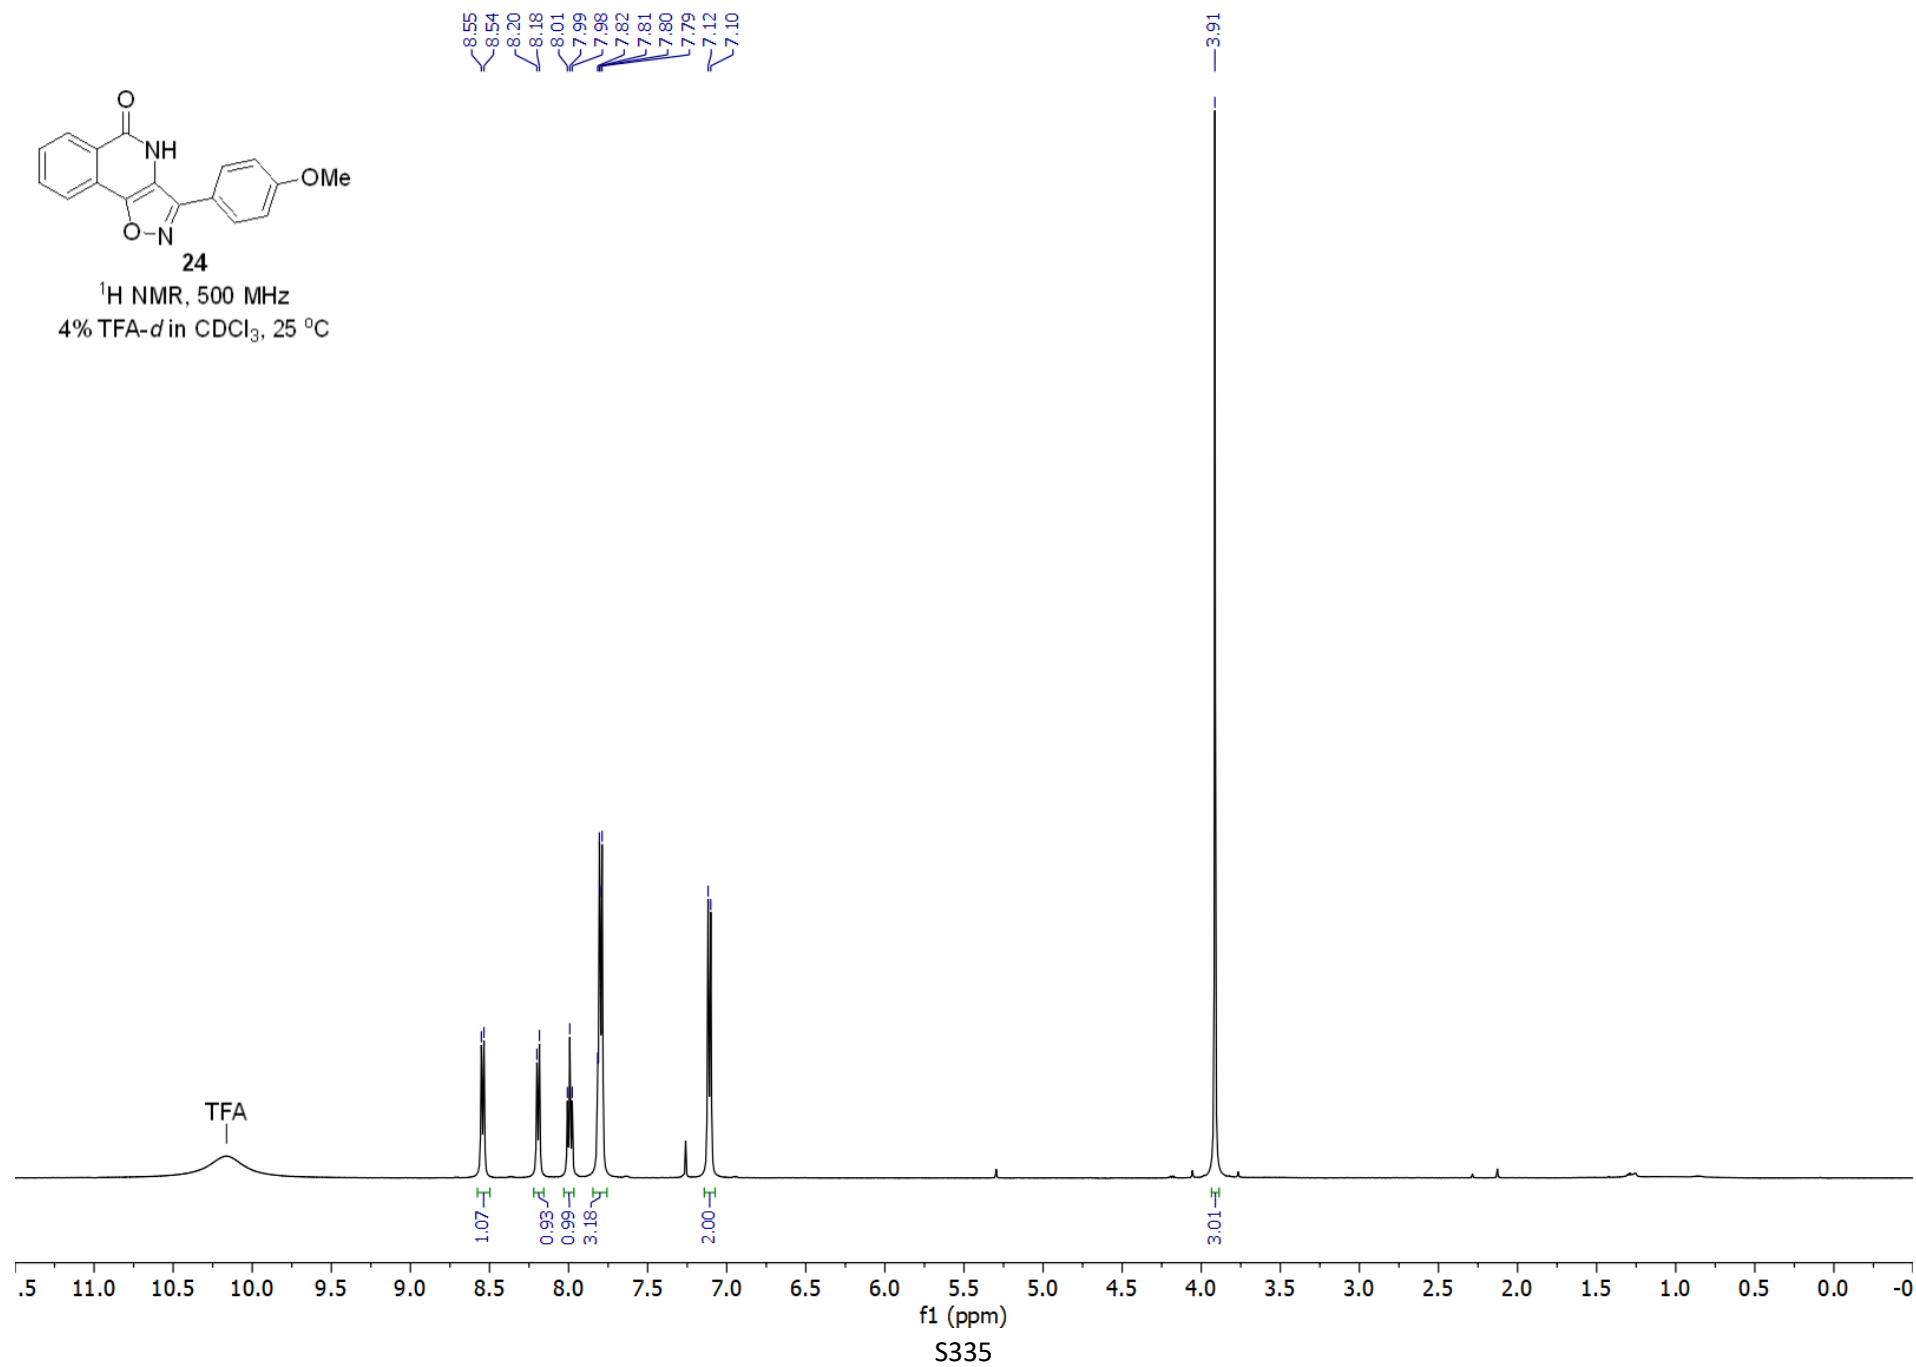

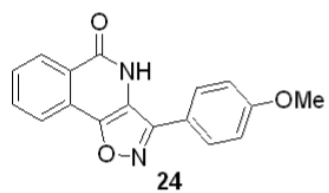

$^{13}\text{C}$  NMR, 125 MHz  
4% TFA-*d* in  $\text{CDCl}_3$ , 25 °C

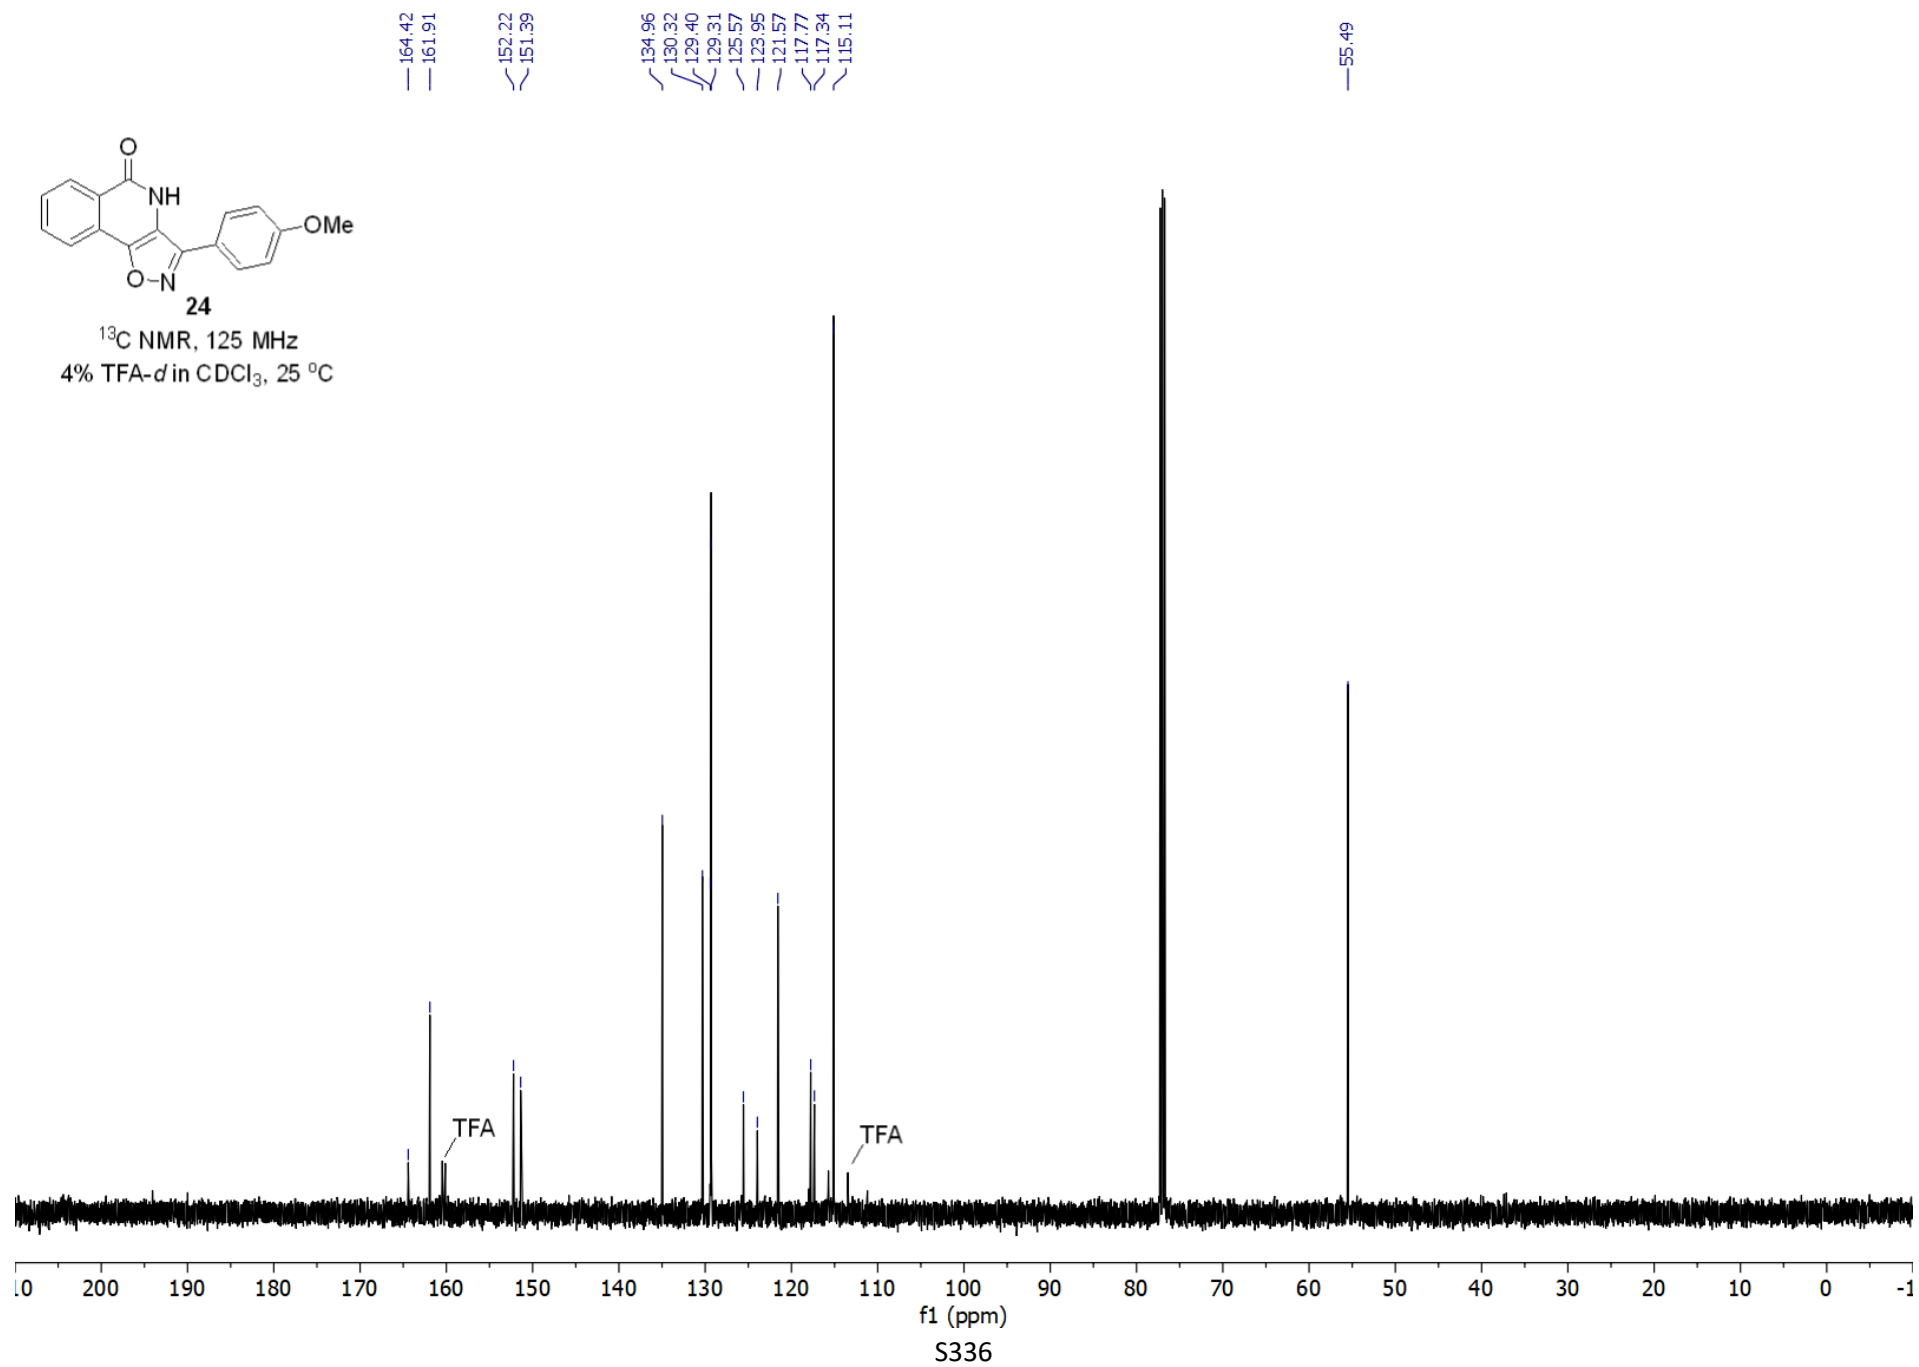

Supplement: s1 [file s1]
